# Supplementary material for: DeepDISE: DNA Binding Site Prediction Using a Deep Learning Method
Source: MDPI journal article supplement (doi:10.3390/ijms22115510), 2021-05-24
Supplement: s1 [file s1]

## Supplementary Materials

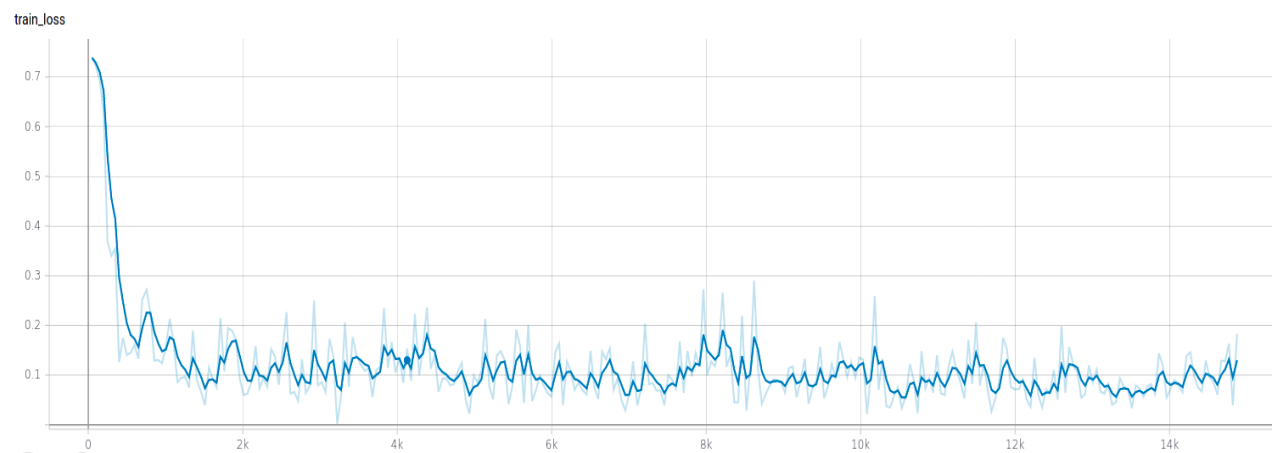

**Figure S1.** The trajectory of the Loss function of the training dataset

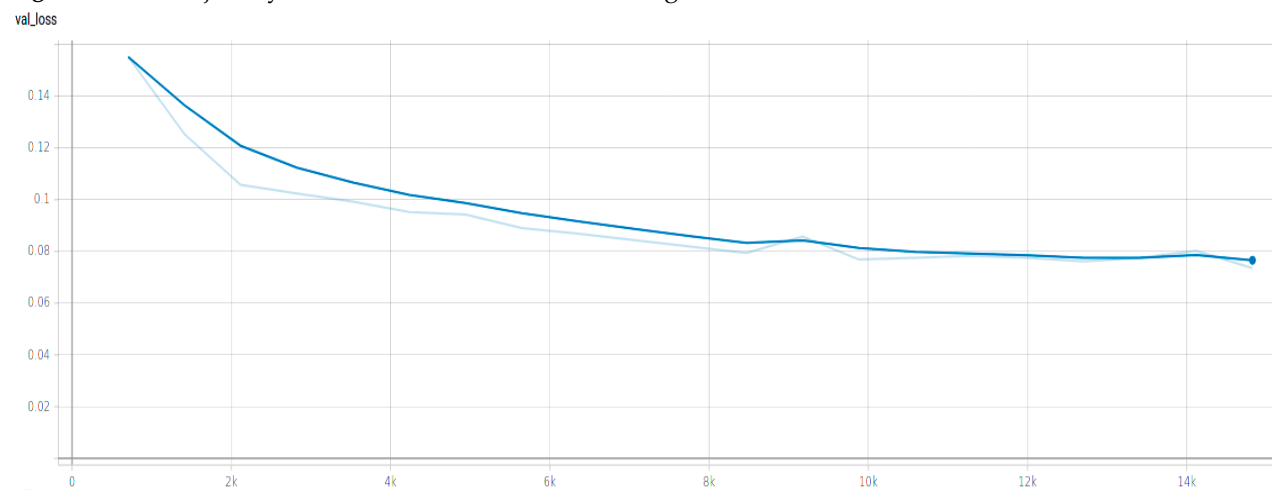

**Figure S2.** The trajectory of the Loss function of the validation set
