# Supplementary material for: DeepDISE: DNA Binding Site Prediction Using a Deep Learning Method
Source: Int J Mol Sci. 2021 May 24;22(11):5510. doi: 10.3390/ijms22115510 (PMC8197219; doi:10.3390/ijms22115510)
Supplement: Supplementary file 1 [file ijms-22-05510-s001.zip]

Archive with 4 entries (4 files):
- ijms-1188006-supplementary.pdf
- Supplementary-1_sequence alignment training set.txt
- Supplementary-2_sequence alignment training vs DNA224.txt
- Supplementary-3_sequence alignment training vs DNA62.txt
