# Supplementary material for: DeepDISE: DNA Binding Site Prediction Using a Deep Learning Method
Source: Int J Mol Sci. 2021 May 24;22(11):5510. doi: 10.3390/ijms22115510 (PMC8197219; doi:10.3390/ijms22115510)
Supplement: Supplementary file 1 [file ijms-22-05510-s001.zip › Supplementary-1_sequence alignment training set.txt]

Supplementary results
All-against-all pairwise sequence alignment inside the training dataset
KVV--PI--A-S--L-T-P-------Y-------Q---S-------K---W---T-I-C-
         |    | | |       |       |   |                 | | 
DALCRELWHACAGPLVTLPREGERVYYFPEGHMEQLEASMHQGLEQQMPSFNLPSKILCK
A-----RV---TNK--SQI----R-TWS--NS-RG---E-GK--LFSL-E-L-V-DES--
      |    |     ||        |   |      |  |    |    |   | |  
VINIQRRAEPETDEVYAQITLLPELDQSEPTSPDAPVQEPEKCTVHSFCKTLTASDTSTH
-G-EI--R-A-TA-----FN-E---Q--V--D----K--F---F---P---LI----E--
 |     | |               |  |  |       |   |   |   |        
GGFSVLRRHADDCLPPLDMSQQPPWQELVATDLHNSEWHFRHIFRGQPRRHLLTTGWSVF
V-N-K-V----YYFSKG-T--LKI-A--N-KQFTAVKNDYEM------T----FNNET--
|   | |      |  |    |         |   |     |      |        |  
VSSKKLVAGDAFIFLRGENEELRVGVRRHMRQPSSVISSHSMHIGVLATAAHAITTGTIF
SVM--P----CE---D-DHHL--PT----V------QFD---FTG-IDDL-ENKSK---D
||   |     |        |   |    |       |    | | |    ||||    |
SVFYKPRTSRSEFIVSVNRYLEAKTQKLSVGMRFKMRFEGKRFSGTIVGVQENKSSVWHD
----SL-V--D----I-----I------------GICK-----------S---------Y
    || |  |                         |                      |
SEWRSLKVQWDEPSSVFRPERVSPWELEPLNLSDALCRELWHACAGPLVTLPREGERVYY
------E--DAT--K-I--TVRS-N--NR---EV---AKR-----N-IY-----L--MD-
      |   |           | |        |     |        |     |   | 
FPEGHMEQLEASMHQGLEQQMPSFNLPSKILCKVINIQRRAEPETDEVYAQITLLPELDQ
---TS--G------K--V------VTA--T-L-WG-----EDA-D---KFDGSRQ-P---
   ||         |  |       ||  |    |       | |     | | | |   
SEPTSPDAPVQEPEKCTVHSFCKTLTASDTSTHGGFSVLRRHADDCLPPLDMSQQPPWQE
-V---L--A------I-KG--AR----------V-S------D---F--G-------G--
 |   |         |  |   |          | |      |   |  |       |  
LVATDLHNSEWHFRHIFRGQPRRHLLTTGWSVFVSSKKLVAGDAFIFLRGENEELRVGVR
---R---SL--SVLSS-S-------T----I----I-A---NP-----D-I-P-----EA
   |       || || |       |    |    |      |       |       ||
RHMRQQTNIPSSVISSHSMHIGVLATAAHAITTGTIFSVFYKPRTSRSEFIVSVNRYLEA
----------YKL------R------G--------WFDAE--G---Q-------------
           |       |      |        | | |      |             
KTQKLSVGMRFKMRFEPEKRFSGTIVGVQENKSSVWHDSEWRSLKVQWDEPSSVFRPERV
--------
        
SPWELEPL
1jmc 4ldx  118  238  668  49.58  17.66
------------K--V----V---P-----I-A--------------S-L-------TP-
            |       |   |     | |              |         || 
PISPIETVPVKLKPGMDGPKVKQWPLTEEKIKALVEICTEMEKEGKISKIGPENPYNTPV
Y----Q-S-KW------------T-----I---C---A-----R-VT-----NK--S---
       | ||            |             |       ||         |   
FAIKKKDSTKWRKLVDFRELNKRTQDFWEVQLGIPHPAGLKKKKSVTVLDVGDAYFSVPL
-Q-IR--T-W---S-NSR--G---------EG-K----LF--S----LE--------LV-
    |  |     | |    |          | |     |  |    ||         | 
DEDFRKYTAFTIPSINNETPGIRYQYNVLPQGWKGSPAIFQSSMTKILEPFKKQNPDIVI
----DE----S----G-------E-----IR-A-TA----------F---N-E-------
    |     |    |       |      |   |           |     |       
YQYIDDLYVGSDLEIGQHRTKIEELRQHLLRWGLTTPDKKHQKEPPFLWMGYELHPDKWT
-Q-----------V-D------K--F----FP----------L-----I-EV--------
 |           | |      |        |          |       ||        
VQPIVLPEKDSWTVNDIQKLVGKLNWASQIYPGIKVRQLSKLLRGTKALTEVIPLTEEAE
-----N----K-----V---------------------Y--Y---F----S-K-----G-
     |    |     |                     |  |   |      |     | 
LELAENREILKEPVHGVYYDPSKDLIAEIQKQGQGQWTYQIYQEPFKNLKTGKYARMRGA
-T-----L---------------------K--I--------------A---------N--
 |     |                     |  |              |         |  
HTNDVKQLTEAVQKITTESIVIWGKTPKFKLPIQKETWETWWTEYWQATWIPEWEFVNTP
---K---Q-----------F---------T----A--V------K--------N---D--
   |   |           |         |    |  |      |        |      
PLVKLWYQLEKEPIVGAETFYVDGAANRETKLGKAGYVTNKGRQKVVPLTNTTNQKTELQ
--Y--------E---MT---F-----------------N---------------------
  |        |    |                     |                     
AIYLALQDSGLEVNIVTDSQYALGIIQAQPDKSESELVNQIIEQLIKKEKVYLAWVPAHK
----NE------T-------S------V-----M--------P------------C----
    ||              |      |     |        |            |    
GIGGNEQVDKLVSAGIRKPISPIETVPVKLKPGMDGPKVKQWPLTEEKIKALVEICTEME
----------E----------------------D---------D---------H------
          |                      |         |         |      
KEGKISKIGPENPYNTPVFAIKKKDSTKWRKLVDFRELNKRTQDFWEVQLGIPHPAGLKK
------------H----L------------P-----T--------V------------Q-
                 |            |     |        |            | 
KKSVTVLDVGDAYFSVPLDEDFRKYTAFTIPSINNETPGIRYQYNVLPQGWKGSPAIFQS
--------F--------------D-F-----------T------------GI---D----
        |              |             |            |    |    
SMTKILEPFKKQNPDIVIYQYIDDLYVGSDLEIGQHRTKIEELRQHLLRWGLTTPDKKHQ
-D---L----E---NK-S--------KDS-LV-DI---IG-------I---CK----S--
     |    |    |          |||  | ||    |       |    |    |  
KEPPFLWMGYELHPDKWTVQPIVLPEKDSWTVNDIQKLVGKLNWASQIYPGIKVRQLSKL
------------------------------------YE---D--A----------T----
                                    |    |  |          |    
LRGTKALTEVIPLTEEAELELAENREILKEPVHGVYYDPSKDLIAEIQKQGQGQWTYQIY
----K-I-T-----VR---SNN-R---E-V------A----------K----R-------
    |   |      |    |      | |                 |            
QEPFKNLKTGKYARMRGAHTNDVKQLTEAVQKITTESIVIWGKTPKFKLPIQKETWETWW
---------------N----I---Y-L----M------------D--T----------S-
               |        | |    |            |  |          | 
TEYWQATWIPEWEFVNTPPLVKLWYQLEDIQMTQTTSSLSASLGDRVTISCSASQDISSY
---------G--K--V---------V----------T--A-T---L--------------
         |  |            |          |    |   |              
LNWYQQKPEGTVKLLIYYTSSLHSGVPSAFSGSGSGTDYSLTISNLEPEDFATYYCQQYS
---W----G---E----D-A----------DK--------------F-----------DG
   |    |   |    | |                          |           ||
KFPWTFGGGTKLEIKRADAAPTVSIFPPSSEQLTSGGASVVCFLNNFYPKDINVAWAIDG
S-------R----Q-------------------------------------P-V--L-A-
|            |                                     | |    | 
SAAANGVLNSWTDQDSKDSTYSMSSTLTLTADEYEAANSYTCAATHKTSTSPIVKSFNAN
---I--K----G----A---RV----SDF-----G-G----R--S------L-SV-----
   |  |    |        |     | |     | |    |  |      |        
ECQITLKESGPGIVQPSQPFRLTCTFSGFSLSTSGIGVTWIRQPSGKGLEWLATIWWDDD
------L-S----S---S---------TI------I------A------NP-D-------
      | |    |   |         |       |      |         |       
NRYNPSLKSRLTVSKDTSNNQAFLNMMTVETADTAIYYCAQSAITSVTDSAMDHWGQGTS
--I-------PEAY--------K---------L-RG---------W-----------F--
          |  |                  |  |         |           |  
VTVSSAATTPPSVYPLAPGSAAQTNSMVTLGCLVKGYFPEPVTVTWNSGSLSSGVHTFPA
----D----------------AE-----------G-----Q-
    |                 |                   
VLQSDLYTLSSSVTVPSSTWPSETVTCNVAHPASSTKVDKKI
1jmc 1j5o  168  238 1422  70.59  11.81
--K-V-VPIA-SLTPY-Q---S----KWTI--CA-RV-TNKSQI-R--TWSNSRG-E-GK
        |  ||    |   |    |  |          |       |     |    |
TSNDACLSIVHSLMCHRQGGESETFAKRAIESLVKKLKEKKDELDSLITAITTNGAHPSK
-L-F--SLE--L-V-DESG--E-I--RA-T-A-F--NE-Q-VD--KF-FPL-IE---VNK
       |   | |    |    |  |         ||   |      | |      || 
CVTIQRTLDGRLQVAGRKGFPHVIYARLWRWPDLHKNELKHVKYCQYAFDLKCDSVCVNP
VYY---FS--KG-T-LKI--A---NKQ------FT--A----V-K-ND-Y-EM-T-FNN-
  |    |       | |        |      |   |    | |      |        
YHYERVVSPTSNDACLSIVHSLMCHRQGGESETFAKRAIESLVKKLKEKKDELDSLITAI
ETS-VMP--C---E-D-DHHLPTV--Q-F-D--FTGI---DDL-EN--KS-K--DSLVDI
 |    |  |       |  |       |            ||  |  |  |      | 
TTNGAHPSKCVTIQRTLDGRLQVAGRKGFPHVIYARLWRWPDLHKNELKHVKYCQYAFDL
-I-GIC-K--SYE-----DA-TKI--T-V--RSNNR-EV-AKR---N-I-YL------MD
     |     ||     ||   |       |     |  |||        |       |
KCDSVCVNPYHYERVVSNDACLSIVHSLMCHRQGGESETFAKRAIESLVKKLKEKKDELD
-------TSG----KVVT--ATLWGE-D-AD-K-FDG---SR--Q-P-V----L------
       | |    | ||   || |    |  | |      |    |      |      
SLITAITTNGAHPSKCVTIQRTLDGRLQVAGRKGFPHVIYARLWRWPDLHKNELKHVKYC
--A--IK--G--A------RVS-D---------F----GG-------RSL-S-V--L---
  |   |            ||| |              ||       |   | |  |   
QYAFDLKCDSVCVNPYHYERVSNDACLSIVHSLMCHRQGGESETFAKRAIESLVKKLKEK
--S-SS--T-IIAN---P----------D----I------PEA-Y-KL-R------G---
     |  | |  |   |          |           |   |  | |          
KDELDSLITAITTNGAHPSKCVTIQRTLDGRLQVAGRKGFPHVIYARLWRWPDLHKNELK
------W-FD--AE----G----Q--
        ||                
HVKYCQYAFDLKCDSVCVNPYHYERV
1jmc 3qsv   97  238  506  40.76  19.17
KVVPIASL-TPY-Q-SK-W--TICARV-TNKSQIRTWSN-S--RGEGKLFSLELVDESGE
|    |     | |  |       |    |   |    |       | ||        | 
KFAHLADIHLGYEQFHKPQREEEFAEAFKNALEIAVQENVDFILIAGDLFHSSR-PSPGT
I-RATAFNEQVDK-F-FPL--IEVN-----K---VY-YFSK-GTLKIANKQFTAVKNDY-
   | |   |  |    |   || |         |       |           | | | 
LKKAIAL-LQIPKEHSIPVFAIEGNHDRTQRGPSVLNLLEDFGLVYVIGMRKEKVENEYL
--EMTFNNETSVMPC-ED-D-HHLPTVQFD-FTGIDD-LEN--KSKDSLVDII--GICK-
  |   | |  |     |   |         |      |       |        |    
TSERLGNGEYLVKGVYKDLEIHGMKYMSSAWFEANKEILKRLFRPTDNAILMLHQGVREV
S--Y-EDATKITVRS--NNR-EVAKRNIY-LMDT--SGK-VV-TATL--W--GE-DAD-K
|    ||   |            |   |     |  ||  ||    |  |  |       
SEARGEDYFEIGLGDLPEGYLYYALGHIHKRYETSYSGSPVVYPGSLERWDFGDYEVRYE
FDGSR-QPVLAI-KGAR-VSDFGGR----S----LSV-L--SSSTI---IAN--PDIPE-
 ||          ||   | ||  |           |    |   |   |    | ||  
WDGIKFKERYGVNKGFYIVEDFKPRFVEIKVRPFIDVKIKGSEEEIRKAIKRLIPLIPKN
AY-KLR-GW---FD-A---E--G-Q---------
||  |  ||   ||     |              
AYVRLNIGWRKPFDLTEIKELLNVEYLKIDTWRI
1jmc 3dsc   73  238  332  30.67  21.99
KVVPIASLTPYQSKWTICARVTNKSQI--RT-WSNSRGEGKLFSLELVDESGEIRATAFN
             |  ||      |||   |   |     |   |  |          ||
--MDLEMMLDEDYKEGICL-I-DFSQIALSTALVNFPDKEKI-NLSMVRHL-ILNSIKFN
-EQVDKF-F-PLIE-V-N-KVYYFSKGTLKIANK-QFTAVKNDY-EMTFN--NE-TSVMP
                 | |  |          |   |     | |       |    ||
VKKAKTLGYTKIVLCIDNAKSGYWRRDFAYYYKKNRSTWDWEGYFESSHKVIDELKAYMP
--CED-D-H----HLPT-V-QFDFTGIDDLENKSK-D-S-LVDIIGICKSYEDA-TK-IT
    | |      |    |  |   |   |   |  |   |       |       |   
YIVMDIDKYEANDHIAVLVKKFSLEGHKILIISSDGDFTQLHKYPNV-KQWSPMHKKWVK
VRSNNREV-AKRNIY---LMDTSGKV-VTATLW-GE-DADKFDGSRQPVL-AI---K-GA
  |   |      |      |    | |    |                  ||      |
IKSGSAEIDCMTKILKGDKKDNVASVKVRSDFWFTRVEGERTPSMKTSIVEAIANDREQA
RV----SDFGG-R-SLSVLSSSTI---IA-N-PDIPEAYKL--RG----WF-DA---E--
 |    |        |       |   || |       |||  ||     |  |      
KVLLTESEYNRYKENLVLIDFDYIPDNIASNIVNYYNSYKLPPRGKIYSYFVKAGLSKLT
---GQ-
      
NSINEF
1jmc 2ihn   59  238  299  24.79  19.73
KVVPIASLTPYQSKWTICARVTNKSQI-RTWSNSRGEGKLFS-LELVDESGEIRATAFNE
    |       |  |       || |    | |  |   |  |    |  |        
AITKINDCFELLSMVTYADKL--KSLIKKEFSIS-FE-E-FAVLTYISENKE-KEYYLKD
QVDKFFPLIEVNKVYYFSKGTLKIANKQFTAVKNDYEMTFNNETSVMPCEDDHHLPTVQF
 | |    |      || |              |        | |              |
IVVKAVK-I-LSQEDYFDKKRNEHDERTVLILVNAQQRK-KIE-SLLSRVAITKINDC-F
DFTGIDDLENKSKDSLVDIIGICKSYEDATKITVRSNNREVAKRNIYLMDTSGKVVTATL
          | | ||        | |     |  | | |  |   || |   | |   |
ELLSMVTYADKLK-SLIK-KEFSISFEEFAVLTYISENKE--K-EYYLKDIVVKAV-KIL
WGEDADKFDGSRQPVLAIKGARVSDFGGRSLSVLSSSTIIANPDIPEAYKLRGWFDAEGQ
     | ||         |  |      |    |          | |   |         
-SQE-DYFD--K------K--R-NEHDERTVLILVNAQ--QRKKI-ESL-L-SRVNKRIT


1jmc 1fzp   50  238  205  21.01  24.39
KVVPIASLTPYQSKWTICARVTNKSQIRTWSNSRGEGKLFSLELVDESGEIRATAFNEQV
   |      |         |       |   |  |  |      |   | |   ||   
---PKTQRGIYHN-LKESEYVASNTDV-TFFFS-SE--LYLNKFLDGYQEYR-KKFNKKI
DKFFPLIEVNKVYYFSKGTL--KIANKQFTA-VKNDYEMTFNNETSVMPCEDDHHLPTVQ
         |        |         | |  | |   |   |  |         |   
ER-VAVTPWN-MDMLADITFYSEVEKRGFHAWLKGD-NATW-REVHVYALR-IMTKPNT-
FDFTGID-D-L-E-NKSKDSLV-DII-GICKS-Y-EDATKIT--VRSN---NREVAKRNI
 |   |    | |  ||       |      | |    |  |    |    |        
LDWSRIQKPRLRERRKSMPKTQRGIYHNLKESEYVASNTDVTFFFSSELYLNKFLDGYQE
YLMDTSGKV--VTATLWGED--AD-KF--DGSRQPVLA-IKGARVSDFGGRSLSVLSSST
|      |   |  | |  |  ||  |          |  ||        |   |     
YRKKFNKKIERVAVTPWNMDMLADITFYSEVEKRGFHAWLKGDNAT-W--REVHVY-ALR
IIANPDIPEAYKLRGWFDAEGQ
|   |       |  |      
IMTKPN---T--L-DWSRIQ-K
1jmc 2fio   53  238  236  22.27  22.46
-KV-VPI-A-----S-L------T-------P-YQSK-WTI--CA-----R--V-T-NK-
  |     |       |      |       |  | |       |        |    | 
VSVQLEMKALWDEFNQLGTEMIVTKAGRRMFPTFQVKLFGMDPMADYMLLMDFVPVDDKR
-------SQ--I--R----T-----W-SNS--RG-EG-K-L--F-SLE----LVDESGE-
       |           |         |   |    |    |  |     | |  |  
YRYAFHSSSWLVAGKADPATPGRVHYHPDSPAKGAQWMKQIVSFDKLKLTNNLLDDNGHI
I-----R-ATAFN-EQVD-K--F--FPLIEV--NKV-YYFS-KGT-LKIA-N---KQF-T
|     |    |    ||    |  |   |     |  |     | |||| |   | |  
ILNSMHRYQPRFHVVYVDPRENFKTFVFEETRFTAVTAYQNHRITQLKIASNPFAKGFRD
-AVKNDYEM-T----FNN-ETSVMPCEDDHHL-PTVQFDFTGIDDL-ENK-SKDSL-V-D
  |    ||      ||   |            || |    | |         |   | |
GGVSVQLEMKALWDEFNQLGTEMIVTKAGRRMFPTFQVKLFGMDPMADYMLLMDFVPVDD
--I-IGI-CKSY----E-D-ATKITVRSNNREVAKRNIYLMD-TS-GKV-VTATLWGEDA
          |       | ||   |       ||         |  |   |  |     
KRYRYAFHSSSWLVAGKADPATPGRVHYHPDSPAKGAQWMKQIVSFDKLKLTNNLLDDNG
D-KFDG-SR-QP---VLAIKGARVSD-FGGRSL-S-VLSSS--T-IIA--NPDIPEAYKL
        | ||   |        |           |      |   |  |  |    | 
HIILNSMHRYQPRFHVVYVDPRKDSEKYAEENFKTFVFEETRFTAVTAYQNHRITQ-LKI
-RGWFDAEG-Q-
    | | |   
ASNPF-AKGFRD
1jmc 4a04   77  238  370  32.35  20.81
K---VV-PIASLTPYQSKWTICARVTN-K-SQI-RT-WSN-S-R-GEGKLF-SL-ELVDE
     |   | |  |    |   |    |     |                 || || | 
STGFLVKQRAFLKLYMITMTEQERLYGLKLLEVLRSEFKEIGFKPNHTEVYRSLHELLDD
SGEIRATAFNEQVDKFFPLIEVNKVYYFSK-GTLKIANKQFTAVKNDYEMTFNNETSVMP
 |            |   | ||   | |      |   ||   |  |       |     
-GILKQIKVKKEGAK---LQEV-VLYQFKDYEAAKLYKKQL-KVELDRSKKL-IEKALSD
-CEDDHHLPTVQFDFTGIDDLENKSKDSL--VDIIGICKSYEDATKITVRSNNREVAKRN
           |  |             |          | |    |    |  ||  | 
NFRSSTGFLVKQRAFLKLYMITMTEQERLYGLKLLEVLRS-E-FKEIGFKPNHTEV-YRS
IY-LMDTSGKVVTATLWGEDADKFDGSR-QPVLAIKGARVSDFGGRSLSVLSSSTIIANP
   | |  |             |  |   | |         |        |         
LHELLD-DG-IL-KQI--K-VKK-EGAKLQEVV-L--YQFKDY--EA-AKLYKKQ-L-KV
DIPEAYKLRGWFDAEGQ
      ||         
ELDRSKKLIEKALSDNF
1jmc 2dpd   47  238  232  19.75  20.26
KVVPIASLTPYQSKWTICARVTNKSQIRTWSNSRGEGKLFSLELVDESGEIRATAFNEQV
             |   |     |       |   |    |      |   ||    | |
E--QACDICRLK-KLK-CSKEKPKC-AKCLKNN-WECR-YSPK-TKRSPLTRA-HLTE-V
DKFFPLIEVNKVYYFSKGTLKIANKQFTAVKNDYEMTFNNETSVMPCEDDHHLPTVQFDF
       |      |    | |    |     |  |      |      |          
ESRLERLE--QL--F---LL-I----F-P-REDLDMILKMD-S-L--Q-D--IKAL---L
TGIDDLENKSKDSLVDIIGI-C-KSYEDATKITVRSNNREVAKRNIYLMDTSGKVVT-AT
||   ||    |         | |      |     || |   |  |   |     | | 
TG---LE-QACD-ICRLKKLKCSKEKPKCAK-CLK-NNWE-C-R--YSPKTKRSPLTRAH
LWGEDADKFDGSRQPVLAIKGARVSDFGGRSLSVLSSSTIIANPDIPEAYKLRGWFDAEG
|  |         |  | |   |  |        |         ||  |  |       |
L-TEVESRLERLEQLFLLI-FPR-EDL---DM-ILKMDS-L-Q-DI-KA--L---L-T-G
Q
 
L
1jmc 3coq   49  238  178  20.59  27.53
KVVPIASLTPYQSKWTICARVTNKSQIRTWSNSRGEGKLFSLELVDESGEIRATAFNEQV
   |   ||   |      |   | |||        |   |  |     |   |  |   
Q--P---LT--SSE-----RI-DK-QIR-YI-L--DG-I-S-AL--RK-E---TC-NKS-
DKFFPLIEVNKVYYFSKGTLKIANKQFTAVKNDYEMTFNNETSVMPCEDDHHLPTVQFDF
     |   |      |     | |            || ||    |     |  |    
N----L---N-L---PK--M--AEKD--GC---FQSGFNEET----C-----L--VKI-I
TGIDDLENKSKDSLVDIIGICKSYEDATKITVRSNNREVAKRNIYLMDTSGKVVTATLWG
||    |      |        | |      |      |    |       |  | |   
TGLLEFE-VYLEYLQN--RF-ESSEEQAR-AVQMSTK-VL---IQFLQ-K-KAIT-T---
EDADKFDGSRQPVLAIKGARVSDFGGRSLSVLSSSTIIANPDIPEAYKLRGWFDAEGQ
 |      |    |        |     |  |  |             ||        
PDPTT-NASLLTKLQAQNQWLQDM-TTHL-IL-RS--F-K-EFLQS-SLRA-L-RQ-M
1jmc 4ni7   48  238  150  20.17  32.00
-----KV--V----PI--A---S-----L-T----------P----Y------QS-----
     |        |   |           |               |      ||     
RMVMGKIKRIEAGLPLTTAKGRTFGYDVIDTKLYINEEEAKQLRLIYDIFEEEQSITFLQ
--------K---------W-T--I-C-------------------A-----RV----T--
        |         | |    |                         ||       
KRLKKLGFKVRTYNRYNNWLTNDLYCGYVSYKDKVHVKGIHEPIISEEQFYRVQEIFSRM
------NK------------S----------Q--I--------R---------T------
      ||            |                      |         |      
GKNPNMNKESASLLNNLVVCSKCGLGFVHRRKDTVSRGKKYHYRYYSCKTYKHTHELEKC
----W-------------SN----SR---------G-----E-G--K-LF----------
    |              |    ||               |    | ||          
GNKIWRADKLEELIIDRVNNYSFASRNIDKEDESLNEKLKIEHAKKKRLFDLYINGSYEV
S-L----------------------EL-----VD-------E------S--------G--
| |                      ||     ||       |      |        |  
SELDSMMNDIDAQINYYEAQIEANEELKKNKTVDFNSLEFREKQLYLKSLINKIYIDGEQ
-------E-------------I-R--A-----TA----F-----------N--E--Q---
       |             | |  |     ||    |           |  |  |   
VTIEWLLEHHHHHHDRMVMGKIKRIEAGLPLTTAKGRTFGYDVIDTKLYINEEEAKQLRL
V-D----------------K--F----------------------F-----------PLI
  |                |  |                                  | |
IYDIFEEEQSITFLQKRLKKLGFKVRTYNRYNNWLTNDLYCGYVSYKDKVHVKGIHEPII
--E----V----------------------N---------------K--V-------Y-Y
  |    |                      |               |  |       | |
SEEQFYRVQEIFSRMGKNPNMNKESASLLNNLVVCSKCGLGFVHRRKDTVSRGKKYHYRY
FS----KGT--L-----KI--ANK--Q----------F---T---------A-VK-----
 |    | |  |     ||  | |             |             |  |     
YSCKTYKHTHELEKCGNKIWRADKLEELIIDRVNNYSFELDSLNEKLKIEHAKKKRLFDL
--------N--D-----Y-----------------E----M-T--FN-------------
        |  |     |                 |      |  ||             
YSELDSMMNDIDAQINYYEAQIEANEELKKNKKIQENLADLATVDFNSLEFREKQLYLKS
--N------E--T------S--VM----------P---CE------D--D---H-H----
  |      |  |         ||          |           |  |          
LINKIYIDGEQVTIEWLLEDRMVMGKIKRIEAGLPLTTAKGRTFGYDVIDTKLYINEEEA
----L---------P-T-VQ-------F-----D-F----T-----G-I---D-------
    |           |  |       |            |     |     |       
KQLRLIYDIFEEEQSITFLQKRLKKLGFKVRTYNRYNNWLTNDLYCGYVSYKDKVHVKGI
-D--L---------E-----------NK---S--KD----S---L--V----DII--G--
              |           ||   |        |   |  |    |    |  
HEPIISEEQFYRVQEIFSRMGKNPNMNKESASLLNNLVVCSKCGLGFVHRRKDTVSRGKK
-----I-CKSY----E-D--------ATK---ITV-R-SN------N--R--------E-
       || |    |          | |       |  |      |           | 
YHYRYYSCKTYKHTHELEKCGNKIWRADKLEELIIDRVNNYSFASRNIDKEDELDSLNEK
--V--A--KR---------N-----I--Y---------L---------M-D--T------
     |  ||         |     |  |         |           |  |      
LKIEHAKKKRLFDLYDSMMNDIDAQINYYEAQIEANEELKKNKKIQENLADLATVDFNSL
----------S--GKV-V---TATL-W-------G-----E------------------D
          |   |        |  |       |     |                  |
EFREKQLYLKSLINKIYIDGEQVTIEWLRDRMVMGKIKRIEAGLPLTTAKGRTFGYDVID
---------A-------D----------------K--F----------------------
         |       |                |  |                      
TKLYINEEEAKQLRLIYDIFEEEQSITFLQKRLKKLGFKVRTYNRYNNWLTNDLYCGYVS
--D-----G------S-----R-Q---------P---------V--LAI--K---G-A--
  |     |      |     | |         |            |    |   |    
YKDKVHVKGIHEPIISEEQFYRVQEIFSRMGKNPNMNKESASLLNNLVVCSKCGLGFVHR
R---VS----------D---F---------GG---RS--L-S-VL------S--S-----
|   ||                        |    |   |           |  |     
RKDTVSRGKKYHYRYYSCKTYKHTHELEKCGNKIWRADKLEELIIDRVNNYSFASRNIDK
--S--------T-I------I-ANPD------IPE--A--------Y-K-L--R----G-
             |      | ||        | |           | | |       | 
ELNEKLKIEIDAQINYYEAQIEANEELKKNKKIQEFNSLEFREKQLYLKSLINKIYIDGE
-----W-FD--AEGQ
     |         
QVTIEWLLEHHHHHH
1jmc 4kis  157  238 1215  65.97  12.92
-----------------K-------V---V------P-I-A---S--LT---P---Y---
                 |       |   |        |     |  |    |       
ARRTSRNVCSNEERKRRKYFHMLYLVCLMVHGFIRNEWINSKRLSRKLSNLVPEKVFELL
--Q--------S--K-WT-I--C-----A--RVTNK--SQ-I--RTW-----S-NSRGEG
  |        |  |       |          | |        |||     | |     
HPQKDEELPLRSTRKLLDGLKKCMELWQKHWKITKKYDNEGLYMRTWKEIEMSANNKRKF
K-L-FS--LELV-----D-E-S--G--E-IRATAFNEQ-V-D-K---FFPL-IE--V---
| |  |  |  |     |   |  |     ||   |           |    |       
KTLKRSDFLRAVSKGHGDPDISVQGFVAMLRACNVNARLIMSCQPPDFTNMKIDTSLNGN
N--K--V-Y--Y-------FS-KG-TLKIAN-K---Q--F-T--A---V----KN-----
|  |  | |          || |  |    | |   |       |   |     |     
NAYKDMVKYPIFWCEVWDKFSKKWITVDPVNLKTIEQVRLHSKLAPKGVACCERNMLRYV
---D--Y---EMT--F----NNETSVMP-CEDD-------------HHLP-T-V-QF-D-
   |  |     |       |          ||             ||   |      | 
IAYDRKYGCRDVTRRYAQWMNSKVRKRRITKDDFGEKWFRKVITALHHRKRTKIDDYEDQ
--F----T-GI-D---DLEN-------KS-KDS-LV-----D-----I---IG-ICKSY-
  |      || |   || |          |    |                |   | | 
YFFQRDESEGIPDSVQDLKNHPYYVLEQDIKQTQIVKPGCKECGYLKVHGKVGKVLKVYA
E-D-A-TK------IT--V-RSNNR--EVAKR----N--IY-LMDT----------SG--
  | |  |                |   | ||        |   ||          ||  
KRDIADLKSARQWYMNGRILKTGSRCKKVIKRTVEEDERLYSFEDTELYIPPLASASGEI
-K-----V-VTA-T-------L-----------W-G-E--DA--D-KFD-GSR-QPVLA-
 |       | | |       |             | |   |    ||  ||   |||  
TKNTFGNIEVFAPTMIPGNCCLVENPVAIKAARFLGVEFAPAVTSFKFERGSTVKPVLSG
I---KGAR--V--S-D---FGGRSL-SVLSSSTIIA-NPD-I-P--E---A-Y-KLR---
|   |  |       |   | |      ||       ||    |  |   | |  ||   
IVVAKWLREAIETAIDGIEFIGLTVEDLLSLRQVVSGNPEALAPLLENISARYPQLREHI
--G--WF-D--AEGQ
      |     |  
MANPEVFVSMLLEAV
1jmc 2qsg  112  238  555  47.06  20.18
-----K-V-V-PIAS-----L-T------PY--QSK--W--T--------I-CAR-VTNK
              |     | |       |    |     |        |  |   |  
MHQDYRELSLDELESVEKQTLRTIVQALQQYSKEAKSIFETTAADSSGEVIVLAEDITQY
S-QI-RTWS-NSR--G--EGK-L-F--S----L-E--LVD-E-SGE-----I-RA----T
      |   | |  |    |      |    |    |||   | |       |      
ALEVAETYPINRRFAGFIDYKRVRWLPSPHGLLPQVLLVDAKASTEKNRDTLQRSQLPMD
A-F-N----EQV--DK-FFP-L-IE-VN---------K--V-YYF-S-K-G---TLK-I-
| | |    | |       | |     |            |  |    | |    || | 
AEFRNTSSGEVVTMEAGVIPHLMLQSANDGVLPAVTTSIFVHFYYRELKEGRYRELKSIY
------AN-KQ-F-----T----AVK-N----D------Y-E-M--T--FN-NE---T--
      |  ||       |    | |             |             |      
VLSLPHARLKQRYNPDPDTSFFGAGKHSPARGEVARIRVYFDRLKEACPWRLQELHYSAD
S--VMP-CED--D-HHLPTVQ--F------DF--TGIDDLEN--K-------------SK
|    |   |  |  |  |    |      |      | ||   |             ||
SEYTQPRWRDLNDAGHEVTKEFLFLERMHQDYRELSLDELESVEKQTLRTIVQALQQYSK
D--SL-----VD----IIGICK--S-Y--EDA-T-----K----I---TVR---S-NN--
   |       |     |        |  | | |          |    ||   |     
EAKSIFETTAADSSGEVIVLAEDITQYALEVAETYPINRRFAGFIDYKRVRWLPSPHGLL
RE---V-AK----RN---I---YL-MD-----T-SGKVVT--A-T---LW---GED----
     | ||     |        | ||     | || |||  |     |      |    
PQVLLVDAKASTEKNRDTLQRSQLPMDAEFRNTSSGEVVTMEAGVIPHLMLQSANDGVLP
A---D---KF------D--GS-RQ--P--VLAIKGARV----S---D---FG-GR-S---
|        |      |  |  |      ||    ||         |   || |  |   
AVTTSIFVHFYYRELKDVEGRYRELKSIYVLSLPHARLKQRYNPDPDTSFFGAGKHSPAR
--LS-V-LSSSTI-IANP-DIPEA-Y----K-LR-GW--F-DA--E---G----Q-
               | |    |  |          |    ||  |          
GEVARIRVYFDRLKEACPWRLQELHYSADSEYTQPRWRDLNDAGHEVTKEFLFLER
1jmc 2ezv  108  238  536  45.38  20.15
K-VVPIASLTPYQSKWTICARV-TNKSQIRTWSN-SRGEGKLFSLELVDESGEIRATAFN
|       |          ||        |   |     |     |      |  | |  
KGHLTRLGLEFFDQPAVPLARAFLGQVLVRRLPNGTELRGRIVETEAY-LGPEDEA-A-H
EQVDKFFPLIEVNKVYYFSKGTLKIANKQFTAVKNDYE-MTFNNETSVMPCEDDHHL-PT
       |    |       |||             |  |          |     | | 
SRGGRQTP--R-NRGMFMKPGTLYV----Y-IIYGMYFCMNISSQGD-GACVLLRALEPL
VQFDFTGIDDLENKSKDSLVDIIGICKSYEDATKI-TVRSNNREVAKRNIYLMDTSGKVV
     |    |       | |    | |     |       |     |     |      
EGLE-T-MRQLRSTLSRVLKD-RELC-S--GPSKLCQALAINKSFDQRDL-AQD---E--
TATLWGEDADKFDGSRQPVLAIKGARVS-DFGGR-SLSVLSSSTIIANPDIPEAYKLRGW
 |  | |       |  |      |||     |      |        |        |  
-A-VWLE-RGPLEPS-EPAV-VAAARVGVGHAGEWARKPL-RFYVRGSPWV-SVVD-R--
FDAEGQ
  ||  
V-AEQD
1jmc 1f6o   45  238  211  18.91  21.33
KV-----V--PI--AS---L-----T-P--Y---QSKW--------T-IC-A----R---
|      |       |           |  |    |          |    |    |   
KAPCKYEVRGKCNRGSECKFNHNYWSWPDRYLLIRSNYLLNQLLRNTDRAGAGREDRTQD
-V---TN--K-----SQ-I-R--T-WS--N------------SR----GEGK--------
 |   ||         | |       |  |             |       |        
FVLGSTNVVQGYIDDNQSITKAAACYSLHNIIKQLQEVEVRQARDNKLSDSKHVALHNLV
L-F--------S-------L--E-------L-VD-ESG---------EI-----RAT-A-
|          |       |  |       |  |   |         |      |     
LSYMEMSKTPASLINNLKRLPREKLKKLAKLIIDLSAGAERKAPCKYEVRGKCNRGSECK
FNEQV----DKF------F---PLI-----------E------V----NKVY-YF----S
||       |             |            |      |    | |  |     |
FNHNYWSWPDRYLLIRSNYLLNQLLRNTDRADGAGREDRTQDFVLGSTNVVQGYIDDNQS
--K--G--TL----K------I--A--NK----QFTAVKN---DY-EM--T----FNN--
  |      |    |         |  ||       |  |    | ||  |     ||  
ITKAAACYSLHNIIKQLQEVEVRQARDNKLSDSKHVALHNLVLSYMEMSKTPASLINNLK
----E-----TS--V-M------PC--E---------D---DH-H--LP----TVQFDF-
    |                  ||  |              |     |           
RLPREKLKKLAKLIIDLSASRKAPCKYEVRGKCNRGSECKFNHNYWSWPDRYLLIRSNYL
TG--I-D-D--L--ENKSKD-SL--VDII-G-------ICK--S-Y--EDATK----ITV
      | |     |    |  |       |       | |    |      |      |
LNQLLRDTDRAAGREDRTQDFVLGSTNVVQGYIDDNQSITKAAACYSLHNIIKQLQEVEV
R-S-NNR--E---VAKRN-I--YL-MD-T--S---G-K-V----V--TATL---W--G-E
|    |       ||  |    |  |  |  |     |          | |      | |
RQARDNKLSDSKHVALHNLVLSYMEMSKTPASLINNLKRLPREKLKKLAKLIIDLSAGAE
-D---AD-KFD--G--SR--Q----------P-----V-----L--AIKGA-----RVSD
 |   |  |    |   |             |           |            |  |
NDSRKAPCKYEVRGKCNRGSECKFNHNYWSWPDRYLLIRSNYLLNQLLRNTDRREDRTQD
F--G------G---------R-----SL-S---------V-------LSSSTIIA--N--
|  |      |               ||           |       || |   |  |  
FVLGSTNVVQGYIDDNQSITKAAACYSLHNIIKQLQEVEVRQARDNKLSDSKHVALHNLV
---------P-D-I------P-EAY-KL-RGWFD----AE--GQ--
         |   |      | |   ||     |    ||      
LSYMEMSKTPASLINNLKRLPREKLKKLAKLIIDLSAGAENDSSYA
1jmc 4csa  111  238  646  46.64  17.18
-KV-VPI---A---S-L---T---PYQ---S-------K------W---T---I-CA---
          |              ||           |      |       |  |   
QELAIQFAAQAVDRNEIEQWVREFAYQGFDARRVIELLKQYGGADWEKDAKKMIVLALTR
-----R----V------T-----N----K----S--Q-----I------RT---------
     |           |     |    |    |               ||         
GNKPRRMMMKMSKEGKATVEALINKYKLKEGNPSRDELTLSRVAAALAGRTCQALVVLSE
W---S-NSR-G-E-G--K--L---F------SL--E-L--V-D-------E-S-------
|         |             |      ||    |    |         |       
WLPVTGTTMDGLSPAYPRHMMHPSFAGMVDPSLPGDYLRAILDAHSLYLLQFSRVINPNL
-G----EIRA--T-----A----F--NE---Q-------VD---K-----------F---
 |    |  |  |     |    |   |           ||   |               
RGRTKEEVAATFTQPMNAAVNSNFISHEKRREFLKAFGLVDSNGKPSAAVMAAAQAYKTA
--F-PL-I----E-V--N---K-V--Y-Y--F-S-------K---GT-----L-K-I--A
     | |      |  |     |    |  |         |   |        | |  |
ANYQELAIQFAAQAVDRNEIEQWVREFAYQGFDARRVIELLKQYGGADWEKDAKKMIVLA
----NK------QFT----A-VK---NDYEM-TFN---NE-T-S-V---M---PC-----
    ||             | |    | |     |    | | | |        |     
LTRGNKPRRMMMKMSKEGKATVEALINKYKLKEGNPSRDELTLSRVAAALAGRTCQALVV
--E---------D--D-----H--H----------LP-----TV---------QF-----
  |         |        |  |          ||                ||     
LSEWLPVTGTTMDGLSPAYPRHMMHPSFAGMVDPSLPGDYLRAILDAHSLYLLQFSRVIN
---------D----FT---------G-I--D---D------L-E-N-K-S----------
              ||           |             |   | | |          
PNLRGRTKEEVAATFTQPMNAAVNSNFISHEKRREFLKAFGLVDSNGKPSAAVMAAAQAY
K------D-SL------VD---I---I------G------I--CKSY-----E-DATK-I
|                ||   |          |      |   | |     | || | |
KTAANYQELAIQFAAQAVDRNEIEQWVREFAYQGFDARRVIELLKQYGGADWEKDAKKMI
--TV-RSN--NR---EVAK--R---N--I--Y-L------MD--T-S-------GKVVTA
     | |   |      |         |  | |       |  | |       |    |
VLALTRGNKPRRMMMKMSKEGKATVEALINKYKLKEGNPSRDELTLSRVAAALAGRTCQA
--TL--W----G-E-D----A-DK------F----D----GSR-QPVL-A-----IKGAR
   |  |    |   |    |         |    |    |      | |         |
LVVLSEWLPVTGTTMDGLSPAYPRHMMHPSFAGMVDPSLPGDYLRAILDAHSLYLLQFSR
V-S-DFGGRSL-SVLSSST--I-IA-NPD-IP-EAYK--LR--GWFDAEG----------
|      ||    |    |     | |   |  |     |   |  |  |          
VINPNLRGRTKEEVAATFTQPMNAAVNSNFISHEKRREFLKAFGLVDSNGKPSAAVMAAA
Q------
|      
QAYKTAA
1jmc 4h5q  121  238  727  50.84  16.64
KVVPIASLTPYQSKWTICARVTNKSQIRTWSNSRGEGKLFSLELVDESGEIRATAFNEQV
                 |   |       |    | |      |    |       | | 
----M-G-R--ECV-N-CG-ATS-TPL--WRRD-GTGH-Y---LCNACG-L-YHKMNGQ-
DKFFPLIE-VNKVYYFSK-GTLKIANKQFTAVKNDYEMTFNNETSVMPCEDDHHLPTVQF
    |||            ||   || | |          |       |     |     
NR--PLIKPKRRLSAARRAGT-SCANCQ-TTTTTLWRRNANGDPVCNACGLYYKLHNINR
DFTGIDDLEN-KSKDSL-VDIIGICKSYEDATKITVRSNNREVAKRNIYLMDTSGKVVTA
  |     |               |      |    |   |       ||    |     
PLT-MKK-EGIQTRNHMGRECVN-C-G-ATSTPLW-R---RD-GTGH-YLCNACG-LY-H
TLWGEDADKFDG-S--R-QPVLAIKGARVSDFGGRSLSVLSSSTIIANPDIPEAYKLRGW
   |       | |    |        |    |              |   |   |  | 
KMNGQNRPLIKGTSCANCQTTTTTLWRRNAN-GDPVCNACGLYYKLHNINRPLTMKKEG-
FDAEGQ
      
IQTR-N
1jmc 4hc7   40  238  204  16.81  19.61
--KVV---P--I-ASLTPYQSKWTICARVTN-KSQ-IRTWSNSRGEG-KLFSL-E-LV-D
                    |   |     |  |   |                |  | |
MLRIIDTETCGLQGGIVEIASVDVIDGKIVNPMSHLVRPDRPISPQAMAIHRITEAMVAD
ESG-E--I-R---A---TAFNEQVD-KFFP-LI-E-V-N-KV-YYFSKGTLKIANKQ-FT
    |  |          | |   |    |    |     |       |  |  |     
KPWIEDVIPHYYGSEWYVAHNASFDRRVLPEMPGEWICTMKLARRLWPG-IKYSNMALYK
AVK-N-DYEMTFNNETSVMPC---ED---D-HHLP--TV-QF-DFTG----IDDLENKS-
  | |               |        |       |  |  | ||    | | |    
TRKLNVQTPPGLHHHRALYDCYITAALLIDIMNTSGWTAEQMADITGRMLRIIDTETCGL
KDSLVDI--IGIC--KSYEDATKITVRSNNREVA-K-RNIY-LMD--TSGK--V--VTAT
    | |        |         ||   |        |          |     |   
QGGIVEIASVDVIDGKIVNPMSHL-VRP-DRPISPQAMAIHRITEAMVADKPWIEDVIPH
LWG-E--DA-D-KFD-G--SRQP---V----LA--I-KGARVSD---FGGRSLSVLSSST
  | |   |    ||       |        ||     |   |       | | |     
YYGSEWYVAHNASFDRRVLPEMPGEWICTMKLARRLWPGIKYSNMALYKTRKLNVQTPPG
I---IANPD--IPEA--YK-LR--GW-FD--AE-GQ
     |  |  |  |         ||     |    
LHHHRALYDCYITAALLIDIMNTSGWTAEQMADITG
1jmc 4fzy   60  238  333  25.21  18.02
KVVPIASLTPYQSKWTICARVTNKSQIRTWSNSRGEGKLFSLELVDESGEIRATAFNEQV
       |||         |   |     |   |             |    |       
S----STLTP-M-H--L--RKA-KLMF-FW--VR-----Y------PS-S--A-VL--KM
DKFFPLIEVNKVYYFSKGTLKIANKQFTAVKNDYEMTFNNETSVMPCEDDHHLPTVQFDF
   ||     |   | |     |  |   ||      | |       |            
--YFP--DI-K---FNK-N-NTA--QL--VK--W---FSN----FR-E-FYYI-QME-KY
TGIDDLENKSKDSLVDIIGICKSYEDATKITVRSNNREVAKRNIYLMDTSGKVVTATLWG
         |   |         |        | |  ||   |         ||  ||  
AR-QAV-TES-E-LYRVLNL--HY-N------RNNHIEV-PQN-FRF-----VVESTL-R
EDADKFDGSRQPVLAIKGARVSDFGGRSLSVLSSSTIIANPDIPEAYKLRGWFDAEGQ
|    |   |    || |           |          |  ||  |    |  | |
E----F--FR----AIQGGKDTEQSWKK-SIYKIISRMDDP-VPEYFKSPN-F-LE-Q
1jmc 1xpx   47  238  144  19.75  32.64
KVVPIASLTPYQSKWTICARVTNKSQIRTWSNSRGEGKLFSLELVDESGEIRATAFNEQV
    |    |                 |   |  ||            |  |      | 
SHM-I-DV-PI-PRFAV-G-IV-IG--R---N--GE--MIK-KIQNDAG-VR---I--QF
DKFFPLIEVNKVYYFSKGTLKIANKQFTAVKNDYEMTFNNETSVMPCEDDHHLPTVQFDF
 |  |                ||  | |    |                |  |  ||  |
-K--P--D-DGT---TP-E-RIA--QITG-PPD-R-A-QHAAEII---TD-LLRSVQQEF
TGIDDLENKSKDSLVDIIGICKSYEDATKITVRSNNREVAKRNIYLMDTSGKVVTATLWG
  |       |  |  |||  |  |  | |   |               ||    |    
NFI--VPT-GKTGL--IIG--KGGE--T-I--KS----ISQQ-------SG----ARI--
EDADKFDGSRQPVLAIKGARVSDFGGRSLSVLSSSTIIANPDIPEAYKLRGWFDAEGQ
|        | |      |   |        |   ||   |     |  |     |  
E----L--QRNP--P-PNA---D---PNMK-L--FTIRGTPQQID-Y-ARQLIE-EKI
1jmc 1j4w   47  238  144  19.75  32.64
-------K------V--V---P-------I--AS---LT-----------P--YQS----
       |         |   |       |        |           |  | |    
MRLFIAEKPSLARAIADVLPKPHRKGDGFIECGNGQVVTWCIGHLLEQAQPDAYDSRYAR
-----------KW--------T---------------I----------------------
           ||        |               |                      
WNLADLPIVPEKWQLQPRPSVTKQLNVIKRFLHEASEIVHAGDPDREGQLLVDEVLDYLQ
-----------C--------A--R-V----TN-K------SQI---RT-W--S-N-----
           |        |  |       |        |     |  |    |     
LAPEKRQQVQRCLINDLNPQAVERAIDRLRSNSEFVPLCVSALARARADWLYGINMTRAY
S---R--G-E-----GK-------L----------F-S---LE----LV---DE------
    |  |       |        |          |      |     |   ||      
TILGRNAGYQGVLSVGRVQTPVLGLVVRRDEEIENFVAKDFFEVKAHIVTPADERFTAIW
--S----------G--------E--I-R-----A--T----------A---F--N----E
  |          |        |    |     |  |          |   |       |
QPSEACEPYQDEEGRLLHRPLAEHVVNRISGQPAIVTSYNDKRESESAPLPFSLSALQIE
---------Q-V-D---------K----------F-----F--------------P--L-
         | | |         |                |              |  | 
AAKRFGLSAQNVLDICQKLYETHKLITYPRSDCRYLPEEHFAGRHAVMNAISVHAPDLLP
-------I------E--V-------------------N--KVY------Y----------
       |         |                   |  |||      |          
QPVVDPDIRNRCWDDKKVDAHHAIIPTARSSAINLTENEAKVYNLIARQYLMQFCPDAVF
-------------F-SK-------G--T-L--K-------------IA--N-----K---
             |  |       |  | |  |              |        |   
RKCVIELDIAKGKFVAKARFLAEAGWRTLLGSKERDEENDGTPLPVVAKGDELLCEKGEV
-----Q----F---------T--A--V--KN--------D--------------------
     |    |         |  |  |  |         |                    
VERQTQPPRHFTDATLLSAMTGIARFVQDKDLKKILRATDGLGTEATRAGIIELLFKRGF
------Y---------------E------M--------T-----------F---------
      |               |      |        |           |         
LTKKGRYIHSTDAGKALFHSLPEMATRPDMTAHWESVLTQISEKQCRYQDFMQPLVGTLY
N--NE---T--------------S--V-------M--------------------P----
        |              |          |                    |    
QLIDQAKRTPVRQFRGIVAPEVGSGAIAHHHHHHMRLFIAEKPSLARAIADVLPKPHRKG
--------------C-----E-------D---------D---------------------
              |     |       |         |                     
DGFIECGNGQVVTWCIGHLLEQAQPDAYDSRYARWNLADLPIVPEKWQLQPRPSVTKQLN
------H------H--------------------L-P-----T----V-----Q------
      |      |                    | |                |      
VIKRFLHEASEIVHAGDPDREGQLLVDEVLDYLQLAPEKRQQVQRCLINDLNPQAVERAI
--------F-------------D-------------------F----------T---G--
        |             |                              |   |  
DRLRSNSEFVPLCVSALARARADWLYGINMTRAYTILGRNAGYQGVLSVGRVQTPVLGLV
I--D-DLEN---K---S-K-------D---------S-----------------L-----
   |   ||   |     |       |         |                 |     
VRRDEEIENFVAKDFFEVKAHIVTPADERFTAIWQPSEACEPYQDEEGRLLHRPLAEHVV
---------V----D---------------I-I------G--------IC-------K--
         |    |                 |      |        ||       |  
NRISGQPAIVTSYNDKRESESAPLPFSLSALQIEAAKRFGLSAQNVLDICQKLYETHKLI
----S---Y--ED----------A-T------------------------K-------I-
    |   |  |           |                          |       | 
TYPRSDCRYLPEEHFAGRHAVMNAISVHAPDLLPQPVVDPDIRNRCWDDKKVDAHHAIIP
TVRSN--N-RE-VAK-RN-I---YLM----D------T-----S-GK-VVTAT-L----W
| ||   |  |  ||  | |   |||    |              || |  |  |    |
TARSSAINLTENEAKVYNLIARQYLMQFCPDAVFRKCVIELDIAKGKFVAKARFLAEAGW
----G------E-D-------A--DK-F-D-G---SR--Q-P-------VL-AIKG-AR-
    |      | |       |  |      |    |  | |        | |  | || 
RTLLGSKERDEENDGTPLPVVAKGDELLCEKGEVVERQTQPPRHFTDATLLSAMTGIARF
V--SD----F----G-G----RS-----L---SVLS--S----ST-----I---I---A-
|   |         | |    |      |     |        ||             | 
VQDKDLKKILRATDGLGTEATRAGIIELLFKRGFLTKKGRYIHSTDAGKALFHSLPEMAT
NPD-----------IPE--A-YK--LR---G--W--FD-A------------E---G---
 ||           | |    |        |      | |            |   |   
RPDMTAHWESVLTQISEKQCRYQDFMQPLVGTLYQLIDQAKRTPVRQFRGIVEVGSGAIA
----Q
     
HHHHH
1jmc 2o5c  163  238 1265  68.49  12.89
KVV-PIA--SLTPYQS-K-W--TICARVTN-KSQIRTWS-NS---RGEG-KLF---SLEL
      |        |         ||  |   |    |  |     || |         
SALHRAADWAKSVFSSAALGDPRRTARLVNVAAQLAKYSGKSITISSEGSKAAQEGAYRF
V-D-E-SGE-IR-ATAFNE-QVDKFFP--L-IE-VNKV-Y-Y-----FSK-GTL--K---
      | | || | |         ||  | ||      |         | |    |   
IRNPNVSAEAIRKAGAMQTVKLAQEFPELLAIEDTTSLSYRHQVAEELGKLGSIQDKSRG
--I-A----N-KQF-T-A-------VK-----N-D-YE----M----T--FN-NE-TS-V
             | |                  |  |         |         | |
WWVHSVLLLEATTFRTVGLLHQEWWMRPDDPADADEKESGKWLAAAATSRLRMGSMMSNV
MP-CE-D-D-H-HL-PTV---Q-F---------DF-TG--I-DDLENKSK-DSL-VDI--
   |    | |  |         |         |   |    | | |          |  
IAVCDREADIHAYLQDKLAHNERFVVRSKHPRKDVESGLYLYDHLKNQPELGGYQISIPQ
IGIC-K--SYED--ATK--ITVRS--------N---N----REV--AK-RN-I-Y-LM--
 |   |        | |     ||        |   |     |    |        |   
KGVVDKRGKRKNRPARKASLSLRSGRITLKQGNITLNAVLAEEINPPKGETPLKWLLLTS
D-T-S---G-KVVTA-T-LWG-ED---ADKFD-GS-RQ----P------V--L---AIK-
    |      |    |  |  |    | |   |  ||    |      |  |   |   
EPVESLAQALRVIDIYTHRWRIEEFHKAWKTGAGAERQRMEKPDNLERMVSILSFVAVRL
-GAR-----V---S-------D----FG----G---R-----SL-----SV--L----SS
   |     |   |       |     |    |   |     ||         |     |
LQLRESFTPVESQSAETVLTPDECQLLGYLDKGKRKRKEKAGSLQWAYMAIARLGGFMDS
S-TIIAN-PDI-P--EA-Y-KLRGWF---D--AEG-Q--
  | ||         ||   || |     |  | |    
KRTGIASWGALWEGWEALQSKLDGFLAAKDLMAQGIKIG
1jmc 4dm0   91  238  459  38.24  19.83
KV-VP-I-A--SL-T-P----YQSKW-----T--ICARV-TNK----S-Q-IR---TW--
 |              |        |          |     |    | |  |       
PVDLGLLEEDDEFEEFPAEHVWEDNWDDDDFSNQLRAELEKHKDLMSSLQSARDLQDMRI
SN-S-R--G-E-GKLF----S-L---EL---V-D---E--S-------G---E-IRATAF
 |   |      | |     | |    |   | |      |       |   | |     
KNKERRHLRLQPGSLYLTKSSTLPRISLQAAVGDRAPSACSPKQLYIYGVSKECINVNSK
N-E--Q--V-D---K--F-----FPLIE----V--N--KV----YY--F--SKGT---L-
| |  |    |   |        | |         |  |      |       |    | 
NAEYFQFDIQDHFGKEDLCAGKGFQLADGGWLIPSNDGKAGKEEFYRALCDTPGVDPKLI
-KI--AN-------K----QFT-----AVK--N-D---------YEMTF-N---N-----
  |  ||       |     |      |    |           |     |         
SSIWVANHYRWIVWKLAAMEFAFPKEFANRCLNPERVLLQLKYRYDVEIDNSRRSALKKI
-E---T-S-VMP-C--E--D-----D--H----HL--P----------TV-QFDFT-G--
 |   |       |     |     |        |  |          || |   | |  
LERDDTAAKTLVLCISDIVDTIELTDGWYAVRAQLDPPLMALVKSGKLTVGQKIITQGAE
-I---D--------D---LE---N-----K--S-----KD---------SL---------
     |        |   |    |        |      |         ||         
LVGSPDACAPLEAPDSLRLKISANSTRPARWHSRLGFFRDPRPFPLPLSSLFSDGGNVGC
VDII---------------G--I--C-----K-S--Y-E------DA--TK-------I-
||||               |  |        |      |       |  ||         
VDIIVQRVYPLQWVEKTVSGLYIFRSEREEEKEALRFAEAQQKKLEALFTKVHTLSRDVT
TV---R--S------N---N--R---EV-A-----KR-NIY-L-MDTS-GK-----V-VT
||   |  |             |            ||  || |    |  |        |
TVWKLRVTSYKKKEKSALLSIWRPSSDLSSLLTEGKRYRIYHLAVSKSKSKFERPSIQLT
AT--L-WGE---DAD---K-F---DG---SR------Q-P---------VLA-IK--G-A
||                           ||      | |         |    |  | |
ATKRTQYQQLPVSSETLLQVYQPRESLHFSRLSDPAFQPPCSEVDVVGVVVSVVKPIGLA
R-V--SD---------FG---GRSLS--VL---S-------S-S---TIIA-NPDI----
  |  ||         ||          ||   |       | |   |  |    |    
PLVYLSDECLNLLVVKFGIDLNEDIKPRVLIAASNLQCQPESTSGVPTLFACHFSIFSAS
P-EAY---K---LR----G---WF-DA--------EG---Q-
| |||   |   |             |        ||     
PKEAYFQEKVNNLKHAIENIDTFYKEAEKKLIHVLEGDSPKW
1jmc 1mje  118  238  642  49.58  18.38
-KVVP-IASL---TP--YQSKW---TICAR-V-TN-K---SQ--IRTWSNSRGE-GK--L
 |       |   |   | | |   |          |   ||  |     |     |  |
SKLDSLLKELPTRTAHLYRSIWHKYTEWLKTMPDDLKLFLSQKYIVKYIASHDDIAKDPL
FSLE-LV------D-ESGE--I-RATAFN-EQVDKF-FP-LIEV-NKV-Y-YFSKGTLKI
             | |                   |     |    |         |   
PTCDAMIWFSRALDIENNDVLVLQQRLYGLVKLLEFDYSNVIAILQKISINLWNPSTDSL
ANKQF-TA---VK--NDYEMTFN-N---E---T-SV--MPC--EDD-------H----H-
  | | |     |   |    || |   |   | |     |   |        |      
QSKHFKTCQDKLKLLLDFQWKFNTNVSFEDRTTVSLKDLQCILDDENGKCGLAHSSKPNF
-L-PTVQ--F--D-FT-GI-DDLE-N--KS--K-D-----S-L--VDII-G-ICKSY--E
 | |  |  |    ||      |     |   | |     | |    || |     |  |
VLVPNFQSPFTCPIFTMAVYYYLRFHGVKKYYKGDGYQILSQLEHIPIIRGKSLDQYPRE
----D--AT--K---I--TVRS--N-NRE------VAK---RN---I---YL--MD-TS-
        |  |      |       | |             |   |   |   |  |  
LTLGNWYPTIFKYCQLPYTKKHWFQVNQEWPQFPDFSESDSENTIGIPDFYIEKMNRTKL
GKV--VTATLWGED--AD-K--FDGSRQP-VLAIKGA-RV--S-D-FGGRSLSVLSS-ST
     |   |   |   |    ||      |       ||    | |   ||        
QPCPQVHVHLFPTDLPPDIQAVFDLLNSVLVTSLPLLYRVFPTHDIFLDPSLKTPQNIAF
IIAN-P-DI-PEAYKLRGWFDAEG--Q
     | ||      |    |  |   
LTGTLPLDIESQEHLLAQLIDKTGTVS
1jmc 3sqi   80  238  387  33.61  20.67
-KVVP-----I--A-SLTP-YQSKWT-I-CAR--VTNK---SQ--I-RTWS--NS-RG-E
 |  |        |  |   |  |          |  |    |          |      
TKKKPLTQEQLEDARRLKAIYEKKKNELGLSQESVADKMGMGQSGVGALFNGINALNAYN
GKLFS--LEL-VDE---S-G-EI----RA-T---AF-NE-Q--V-D--K--FF-P-L--I
  |    |   | |   |   ||     |         |    |        | | |   
AALLAKILKVSVEEFSPSIAREIYEMYEAVSMQPSLRSEYEYPVFSHVQAGMFSPELRTF
-----E--VN---K----VYYFS-KG---TLKIANK-QF-------T----AVK-NDY--
     |  |    |           |   |     |  |            ||   |   
TKGDAERWVSTTKKASDSAFWLEVEGNSMTAPTGSKPSFPDGMLILVDPEQAVEPGDFCI
------EMTFNN--ETS--V-M-PCEDDH-HLP---T----V---QF--D-F--------
      | ||      |  |   |        |        |   |     |        
ARLGGDEFTFKKLIRGSGQVFLQPLNPQYPMIPESCSVVGKVIASQWPEETFGSTKKKPL
T--GIDD---L----E---NK---SKDSLVD--------I--I--GI-C-KSYEDA--TK
|     |   |    |   |    |  |  |              ||     |  |   |
TQEQLEDARRLKAIYEKKKNELGLSQESVADKMGMGQSGVGALFNGINALNAYNAALLAK
I---TV-R-S-N-NREV-----A---K---RN-----IY--L---M---D--T-S-G---
|    |   |    ||      |       |              |      |   |   
ILKVSVEEFSPSIAREIYEMYEAVSMQPSLRSEYEYPVFSHVQAGMFSPELRTFTKGDAE
K-V-VT--A--T-LW----GED--A---DK--F-DGS---RQPVLAIK-G----ARV-SD
  |  |  |     |    |    |    |  | ||      |  |   |    ||   |
RWVSTTKKASDSAFWLEVEGNSMTAPTGSKPSFPDGMLILVDPEQAVEPGDFCIARLGGD
-FGGRSLSVLSSSTI-I--ANPD---IPE--A-Y-K-LRG-W-FDAEGQ
 |    |    |        ||    |||      |     |     | 
EFTFKKL-IRGSGQVFLQPLNPQYPMIPESCSVVGKVIASQWPEETFG-
1jmc 3bdn   93  238  467  39.08  19.91
KVVPIAS-LTPYQSKW-TI-C---AR-V-TNKSQIRTWSNSRGEGKLFSLELVD-ESG-E
 |         |  |     |    | |       |         |    |         
AVLYKSNHNVVYSCKYHIVWCPKYRRKVLVGAVEMRLKEIIQEVAKELRVEIIEMQTDKD
-IRATA-FNEQ--VDKFFPLIE--VNKVY-Y-FS--KGTL-KI-ANKQF--T---AVKND
 |   |       | ||               |   |  |     |  |  |   |  | 
HIHILADIDPSFGVMKFIKTAKGRSSRILRQEFNHLKTKLPTLWTNSCFISTVGGAPLNV
YEMTF-NNETSVMP--CED-DHHLPTVQFDFTGI--DDLEN--KS-KDSLV-------DI
      |   |  |   |         |            |   | |   |         
VKQYIENQQNSNRPKQKEKWKSYVDNLQTKALAVLYKSNHNVVYSCKYHIVWCPKYRRKV
-IG-I---CKS-YEDATK-ITVRSNNREVAKRNIY-L--MDTS-G--KVV-TAT-LWGED
  |      |       |   |        |  |  |   | | |  |   ||       
LVGAVEMRLKEIIQEVAKELRVEIIEMQTDKDHIHILADIDPSFGVMKFIKTAKGRSSRI
-ADKFD--GSRQPVLAIKGARVSDFGGRSLSVLSS-STIIANPDIP-EAYKLRGWFD-AE
    |       | |       |  ||  | |         |   |    |     |   
LRQEFNHLKTKLPTLWTNSCFISTVGGAPLNVVKQYIENQQNSNRPKQKEKWKSYVDNLQ
GQ--
    
TKAL
1jmc 2a6o   56  238  304  23.53  18.42
----------------K-V--V---PI---------A--S-L--T-----P-YQS---K-
                         |          |    |  |     |   |     
PFTYSIEATRNLATTERCIQDIRNAPVRNRSTQFQLAQQNMLAYTFGEVIPGFASAGING
--W--TI---C--A------------RV-TN---K-S----QI-RT---W---S--NS-R
      |      |            ||  |   |       |      |      ||  
MDYRDVIGRPVENAVTEGTHFFRDDFRVDSNAKAKVAGDIFEIVSSAVMWNCAARWNSLM
-GEG-K---LFS---L------E---L-V----D-------ESGE-I---RA--------
 |||       |   |          |      |       || | |   ||        
VGEGWRSQPRYSRPTLSPSPRRQVAVLNLPRSFDWVSLLVPESQEVIEEFRAGLRKDGLG
----T---A-------F-NEQV--DKF--F--P-----------L---I---EVN-----
    |   |       | |             |           |       |       
LPTSTPDLAVVVLPEEFQNDEMWREEIAGLTRPNQILLSGAYQRLQGRVQPGEISLAVAF
K-------VY---Y----FS---KGTL---K----I---A----N-----K--Q-F----
|        |   |          | |   |        |    |               
KRSLRSDRLYQPLYEANVMQLLLEGKLGAPKVEFEVHTLAPEGTNAFVTYEAASLYGLAE
--TAV-K--ND-Y------EM-----TF-N------N-E-T-SV-----M---P-C-EDD
   ||       |              | |      |   | |            |  | 
GRSAVHRAIRELYVPPTAADLARRFFAFLNERMELVNGPFTYSIEATRNLATTERCIQDI
HHLP-----T---V--Q------F-D----F-T-GI---D--D-L----EN---------
   |     |      |      |      |   ||   |  |      ||         
RNAPVRNRSTQFQLAQQNMLAYTFGEVIPGFASAGINGMDYRDVIGRPVENAVTEGTHFF
K-S-K-DS---L-V--DI--I---GI---C--K--S--Y-ED--A----TKITVR-SNNR
      ||     |  ||  |        |     |    |           |   |  |
RDDFRVDSNAKAKVAGDIFEIVSSAVMWNCAARWNSLMVGEGWRSQPRYSRPTLSPSPRR
EVA--K--RNI-Y--LM--DT--------SG--K--V-V-TAT-------L---------
 ||     |      |              |  |      | |       |         
QVAVLNLPRSFDWVSLLVPESQEVIEEFRAGLRKDGLGLPTSTPDLAVVVLPEEFQNDEM
WGED-A-----DK--FDGS------R-QP--V-LAI--K-G--A-R---------VSD--
| |  |           |       | ||    ||   |      |         |    
WREEIAGLTRPNQILLSGAYQRLQGRVQPGEISLAVAFKRSLRSDRLYQPLYEANVMQLL
F-G--G--R-SLSV--L----SSS--T-----I--I-----A-N-P--D--I-PEAYKL-
  |  |       |  |         |              |           | |  | 
LEGKLGAPKVEFEVHTLAPEGTNAFVTYEAASLYGLAEGRSAVHRAIRELYVPPTAADLA
RG-W-F--D-AE--GQ
|    |     |    
RRFFAFLNERMELVNG
1jmc 3dpg  110  238  676  46.22  16.27
KVVPI-AS-LTPY-QSKWTICA----R--VTN-KSQIR-TWSNSRGEGKL-FSLELVDES
   |  |            | |    |      | |     |      |        |  
TLQPTEAAYIAGFLDGDGSIYALLIPRPDYKDIKYQVSLAISFIQRKDKFPYLQDIYDQL
GEIRATAFNEQVDKF--FPLI-EVN-KVYYFS-KGTLKIANKQFTAV-K--NDY-EMTFN
|  |        |       |               | |  ||        | |     |
GK-RGNLRKDRGDGIADYRIIGSTHLSIILPDLVPYLRIKKKQANRILHIINLYPQAQKN
-NE-TSVMPCEDD-HHL-PTV-QFDFTGIDD-LEN--KS-KDSL--VDIIGICKSYE-DA
           ||   |         |  |  ||   |  |  |       |      | 
PSKFLDLVKIVDDVQNLNKRADELKSTNYDRLLEEFLKAGKITLQPTEAAYIAGFLDGDG
T--KITV-R-S-NN-R-EV--A----KR-N-I-YLMD--TS-GKVVTATL-WGED-AD-K
        |         |  |     |     || |     ||        |   ||  
SIYALLIPRPDYKDIKYQVSLAISFIQRKDKFPYLQDIYDQLGKRGNLRKDRGDGIADYR
FDGS-R-Q---P--V--LAI--KGA-RV-S--D-F--GGRSLS-VLSSSTIIAN-PDI-P
  ||       |  |  | |  | | |               |  |    |         
IIGSTHLSIILPDLVPYLRIKKKQANRILHIINLYPQAQKNPSKFLDLVKIVDDVQNLNK
EAYKLRGW-FD---AE----G--Q-
 |  |     |    |    |    
RADELKSTNYDRLLEEFLKAGKIES
1jmc 2fld   62  238  324  26.05  19.14
KVVP------IA----S--LTP------------Y-Q----------S-------K--W-
   |      |     |   ||            | |          |       |  | 
RLSPGEFKTLISKERKSHFITPFALVYKTFCDLGYDQKNSDYFLNNPSEYIIAMRKNCWK
----------T-----------I---C---A-R---V---T--------N---------K
          |           |       | |       |        |         |
EFEPFEKEFTTRMLSYLIDEERIKDMSPYDAIRDFTMEYPTHIYDLALSNTQSRRSRAGK
---S--------------------QI------------------R---------T----W
   |                    ||                  |         |    |
EFESILELLMMGAGIPVDVQGAINQIGKLVDLVMPGVVQYTSNKRNTMLISAKTTLRERW
-----S-N-S--R----------------------G-------E--G---K-----L-F-
       |    |                              |      |     | | 
QEVPEEVNRTGIREMYLATLDDSFSEETINILYEANVVVVTTVENKNFKYKNNNRVLTFE
----S-LEL------V---D--------------E--------------------S-GE-
    |  ||      |   |              |                    | || 
DMLQSAMELSRKWNNVSYTDSEKEEIQQSILKQIEKYSDFPYVVNYYRNRLSARLSPGEF
---I---R-A---T--A-----F-N---EQ--VD--------------K--F--F-P---
   |   |     |  |     |      |   |              |     | |   
KTLISKERKSHFITPFALVYKTFCDLGYDQKNSDYFLNNPSEYIIAMRKNCWKEFEPFEK
---------LI--E-V------N--K---V-Y----Y-----------------F-S---
         ||  |                 |    |                 | |   
EFTTRMLSYLIDEERIKDMSPYDAIRDFTMEYPTHIYDLALSNTQSRRSRAGKEFESILE
-------------------K-------G----------T-L---K---------I---AN
                   |       |          | |   |              |
LLMMGAGIPVDVQGAIQIGKLVDLVMPGVVQYTSNKRNTMLISAKTTLRERWQEVPEEVN
----KQ---------F---T------A-------V-------K--N------D-------
               |   |      |       |       |  |      |       
RTGIREMYLATLDDSFSEETINILYEANVVVVTTVENKNFKYKNNNRVLTFEDMLQSAME
---------Y------E-----M------T-F----N---N-----------E--T----
         |      |              |    |   |           |  |    
LSRKWNNVSYTDSEKEEIQQSILKQIEKYSDFPYVVNYYRNRLSALFDLSPGEFKTLISK
---S--VMP--------CE---D----DHHL--PT---V----------Q-F--DF-T--
   |    |        |    |    |  |  |                 |   | |  
ERKSHFITPFALVYKTFCDLGYDQKNSDYFLNNPSEYIIAMRKNCWKEFEPFEKEFTTRM
-G-------I------D---D--LE-----------N----KS---K--DS----L----
         |      |   |   |           |     |   |   |    |    
LSYLIDEERIKDMSPYDAIRDFTMEYPTHIYDLALSNTQSRRSRAGKEFESILELLMMGA
---VD----I-I---------G-I---C-K------S-----------------------
   ||    | |         |       |      |                       
GIPVDVQGAIQIGKLVDLVMPGVVQYTSNKRNTMLISAKTTLRERWQEVPEEVNRTGIRE
-Y----ED--A--T-----K-----I-TV-------RSNNR----E--V--A-K--R---
 |     |     |             ||         |||    |     |    |   
MYLATLDDSFSEETINILYEANVVVVTTVENKNFKYKNNNRVLTFEDMLQSAMELSRKWN
NI-Y------------L--M----D------------T----S-G--K--V--------V
|  |            |       |                 | |  |            
NVSYTDSEKEEIQQSILKQIEKYSDFPYVVNYYRNRLSALFLSPGEFKTLISKERKSHFI
T--A----T--------------L--------------W---------------G-----
|  |    |              |              |                     
TPFALVYKTFCDLGYDQKNSDYFLNNPSEYIIAMRKNCWKEFEPFEKEFTTRMLSYLIDE
E---D-A--D--K-F---------D-------G--SR---------Q--------PV-L-
|   |    |    |         |          ||                  ||   
ERIKDMSPYDAIRDFTMEYPTHIYDLALSNTQSRRSRAGKEFESILELLMMGAGIPVDVQ
-A-I-K-------G-----A--R----VS------D-F-------G--G-RS--LSVL--
 | | |       |        |     |                   | |   |  |  
GAIIGKLVDLVMPGVVQYTSNKRNTMLISAKTTLRERWQEVPEEVNRTGIREMYLATLDD
S-S-STI-I---AN-PDI-P-E----AYK-----------------L-RGW----F-DA-
| |  || |   ||       |     ||                 | | |      |  
SFSEETINILYEANVVVVTTVENKNFKYKNNNRVLTFEDMLQSAMELSRKWNNVSYTDSE
--E---G---Q----------------------
  |       |                      
KEEIQQSILKQIEKYSDFPYVVNYYRNRLSALF
1jmc 2gb7  159  238 1173  66.81  13.55
KVVPIASLTPYQSKWTICARVTNKSQIRTWSNSRGEGKLFSLELVDESGEIRATAFNEQV
         |       | |  |             |   |       |    |      
-----TQ-CP---R---CQR--N---L-A-ADEFYAGS--S-KMC-K-G-C-MT-W-QNL
DKFFPLIEVNKVYYFSKGTLKIANKQFTAVKNDYEMTFNNETSVMPCEDDHHLPTVQFDF
         ||      |    ||  ||  |           |        |        
-S-Y---NANK-----EG--H-AN-TFT--KATF-LAWYG-LS---AQ--RH---C--GY
TGIDDLENKSKDSLVDIIGICKSYEDATKITVRSNNREVAKRNIYLMDTSGKVVTATLWG
 ||      |        |        |    |  |     |  |     |  |      
CGI------S-EA-----G----F---TSLH-RT-N----PRG-YHIQCLG--V------
EDADKFDGSRQPVLAIKGARVSDF-GGRSLS-VLSSSTIIANPDIPEAYKLRGWFDAEG-
   | | |   |      ||   |   |  |   | |         ||     |    | 
DRSDSFEG-YSP----QNARLACFICNRIKSNIFSASE-M-DV-LGEAIS-KAW-HGRGI
Q
 
A
1jmc 3ldy   44  238  141  18.49  31.21
--K-V-VPIASLTPYQSKWTICARVTNKSQIRTWSNSRGEGKLFSLELVDESGEIRATAF
    |      |       |       |   ||  | ||         |           
DDQLVSMSVRELNRHLRGFTKDEVIRLKQKRRTLKN-RGYAQSCRYKRVQQKHHLE----
NEQVDKFFPLIEVNKVYYFSKGTLKIANKQFTAVKNDYEMTFNNETSVMPCEDDHHLPTV
||   |   ||    |          |     | |   |    |  | |   ||  |  |
NE---K-TQLIQ--QVEQLKQEVSRLARER-DAYKVKSE-KLAN--SGM-FSDD-QL--V
QFDFTGIDDLENKSKDSLVDIIGICKSYEDATKITVRSNNREVAKRNIYLMDTSGKVVTA
         | |     |    |  |   |   |      |    |  |      | |  
--SMS-VREL-N--R-HL-R--GFTK---DEV-IRLKQKRRTLKNRG-YAQSCRYKRVQQ
TLWGEDADKFDGSRQPVLAIKGARVSDFGGRSLSVLSSSTIIANPDIPEAYKLRGWFDA-
    |   |     |  | |    |         |   |   |      |||      | 
KHHLEN-EK---T-Q--L-IQ--QVEQL--KQ-EV---SR-LAR-E-RDAYKVKSEKLAN
EGQ
 | 
SGR
1jmc 2wty   53  238  190  22.27  27.89
KVVPIASLTPYQSKWTICARVTNKSQIRTWSNSRGEGKLFSLELVDESGEIRATAFNEQV
      |      |       | |            | |  | |        |     | 
------S-R-HE-K-SL-GLLTTKF-VSLLQEAK-DGVL-DLKLAADT--L-A-V--RQK
DKFFPLIEVNKVYYFSKGTLKIANKQFTAVKNDYEMTFNNETSVMPCEDDHHLPTVQFDF
      |  | |     |      |     ||                   |       |
RRIYD-I-TN-V--L-EG-IGLIEKK--S-KNSIQ--WKGK-G-L-----RH-------F
TGIDDLENKSKDSLVDIIGICKSYEDATKITVRSNNREVAKRNIYLMDTSGKVVTATLWG
          |   |     |       | |  | | |||                 |  
S----M----K---V-----CEKVQ--RKGTT-SYN-EVAD-EL-VSEFTNS--NNHL-A
EDADKFDGSRQPVLAIKGARVSDFGGRSLSVLSSSTIIANPDIPEAYKLRGWFDAEGQ
 |    |   |    |   || |     | ||    ||      |      |      
ADS-AYD---QK--NIR-RRVYD----ALNVLMAMNIISK----EKKEIK-WIGL--P
1jmc 1cf7   44  238  149  18.49  29.53
------K-------------V---------------------------------------
      |             |                                       
SYQQRLKAAVHYTVGCLCEEVALDKAMQFSKQTIAAISELTFRQCENFAKDLEMFARHAK
--------V-------------------PI--A--------S----L------T------
        |                    |  |        |    |      |      
RTTINTEDVKLLARRSNSLLKYITDKSEEIAQASGFRKELVSRLLHLHFKDDKTKVSGDA
----------------------------------------P-------YQS--K----WT
                                        |       ||   |     |
LQLMVELLKVFVVEAAVRGVRQAQAEDALRVDVDQLEKVLPQLLLDFSYQQRLKAAVHYT
I---C-------A----R-----V---T-----N--KS-QI------R----T-----W-
    |       |              |     |  |          |    |       
VGCLCEEVALDKAMQFSKQTIAAISELTFRQCENFAKDLEMFARHAKRTTINTEDVKLLA
--SNS-------RG-E-----G--K--------L-F-------S----------L-----
  |||          |     |  |        | |       |          |     
RRSNSLLKYITDKSEEIAQASGFRKELVSRLLHLHFKDDKTKVSGDALQLMVELLKVFVV
------------E--L---VD--E----------S-------------G----EI---RA
            |  |   ||  |          |             |    |     |
EAAVRGVRQAQAEDALRVDVDQLEKVLPQLLLDFSYQQRLKAAVHYTVGCLCEEVALDKA
------T--A-----F----N-----E-------------Q-V---------------DK
      |  |     |    |     |               |               ||
MQFSKQTIAAISELTFRQCENFAKDLEMFARHAKRTTINTEDVKLLARRSNSLLKYITDK
---------F------------F----------------P-L-----------I-----E
         |            |                  |                 |
SEEIAQASGFRKELVSRLLHLHFKDDKTKVSGDALQLMVELLKVFVVEAAVRGVRQAQAE
------VN---KV---------Y---------Y----------------F--------S-
      |    ||         |         |                |        | 
DALRVDVDQLEKVLPQLLLDFSYQQRLKAAVHYTVGCLCEEVALDKAMQFSKQTIAAISE
--------------------K----GT-------------L-----K---I--AN-----
                    |     |             |     |   |  ||     
LTFRQCENFAKDLEMFARHAKRTTINTEDVKLLARRSNSLLKYITDKSEEIAQANLERKA
------------------------------K--QF-----------T-------------
                              |  ||           |             
QKKKKSSYQQRLKAAVHYTVGCLCEEVALDKAMQFSKQTIAAISELTFRQCENFAKDLEM
----A---------VK------N-------D-------------------Y-------E-
    |         ||      |       |                   |       | 
FARHAKRTTINTEDVKLLARRSNSLLKYITDKSEEIAQASYQQRLKAAVHYTVGCLCEEV
-----M-------------TF----N-----------------N-E--------------
     |             ||    |                 | |              
ALDKAMQFSKQTIAAISELTFRQCENFAKDLEMFARHAKRTTINTEDVKLLARRSNSLLK
--T-----------------------------S-------------V-------M-----
  |                             |             |       |     
YITDKSEEIAQANLERKAQKKKKSSGFRKELVSRLLHLHFKDDKTKVSGDALQLMVELLK
--------------PCE-------D-----------D-------------H-H-------
                |       |           |             | |       
VFVVEAAVRGVRQAQAEDALRVDVDQLEKVLPQLLLDFSGFRKELVSRLLHLHFKDDKTK
--------------------------------------------LP--------------
                                            ||              
VSGDALQLMVELLKVFVVEAAVRGVRQAQAEDALRVDVDQLEKVLPQLLLDFSGFRKELV
------------T-V-----Q--------F------------------------------
            | |     |        |                              
SRLLHLHFKDDKTKVSGDALQLMVELLKVFVVEAAVRGVRQAQAEDALRVDVDQLEKVLP
----DF------------T-G-----I--D--------------DL-----EN--K----
    ||            | |        |               |     ||  |    
QLLLDFSYQQRLKAAVHYTVGCLCEEVALDKAMQFSKQTIAAISELTFRQCENFAKDLEM
----SK-------D---------S-L--V-D----I------------------------
     |       |         | |    |    |                        
FARHAKRTTINTEDVKLLARRSNSLLKYITDKSEEIAQANLERKAQKKKKSSYQQRLKAA
----IG-IC------------K------S---Y---E----D----A--TK---I-T--V
     |  |            |      |       |    |    |   |   | |  |
VHYTVGCLCEEVALDKAMQFSKQTIAAISELTFRQCENFAKDLEMFARHAKRTTINTEDV
-----RSN----------------------------------------------------
     |||                                                    
KLLARRSNSLLKYITDKSEEIAQASYQQRLKAAVHYTVGCLCEEVALDKAMQFSKQTIAA
----------N-------------R-----E-V---AKR-N--I-YLMD-T------S--
          |             |     | |   | | |    |  |        |  
ISELTFRQCENFAKDLEMFARHAKRTTINTEDVKLLARRSNSLLKYITDKSEEIAQASYQ
-----------G---------------K--V--V---T-----------------A----
           |               |         |                 |    
QRLKAAVHYTVGCLCEEVALDKAMQFSKQTIAAISELTFRQCENFAKDLEMFARHAKRTT
--T-------------L-W------------------------G---E------------
  |             |                          |   |            
INTEDVKLLARRSNSLLKYITDKSEEIAQANLERKAQKKKKSSGFRKELVSRLLHLHFKD
D----A-D---------K-F--D----G--------S-R----Q-----P----------
|      |         | |       |          |    |     |          
DKTKVSGDALQLMVELLKVFVVEAAVRGVRQAQAEDALRVDVDQLEKVLPQLLLDFSGFR
---V-----L------------A----I---K---------G--------A-R-------
   |     |            |        |         |        | |       
KELVSRLLHLHFKDDKTKVSGDALQLMVELLKVFVVEAAVRGVRQAQAEDALRVDVDQLE
-V--S---DFGG-R----S----L---------S-------V--LS----SSTI--I---
 |      || | |    |    |         |       |  |               
KVLPQLLLDFSGFRKELVSRLLHLHFKDDKTKVSGDALQLMVELLKVFVVEAAVRGVRQA
-A-N----P-D----I-P----E-A-Y-K-L--R--------------G-----W-----
 |        |      |          | |  |              |           
QAEDALRVDVDQLEKVLPQLLLDFSGFRKELVSRLLHLHFKDDKTKVSGDALQLMVELLK
-F---------------DA--------E---GQ-----
 |               ||        |    |     
VFVVEAAVRGVRQAQAEDALRVDVDQLEKVLPQLLLDF
1jmc 4ndy  181  238 1718  76.05  10.54
---KVVP-I-AS-LTP-----Y---Q-S----KW--T--I--C-A---R-VT--N-KSQI
    |        |||                |      |    |     ||       |
EADQVIENLQRNELTPREIADFIGRELAKGKKKGDIAKEIGKSPAFITQHVTLLDLPEKI
R-TWSNSR-GE----GKL---F-----SLE--LVDESGEI-RATA--FNEQVDKF--F-P
       |         |   |       |  | |   || | |     |  |       
ADAFNTGRVRDVTVVNELVTAFKKRPEEVEAWLDDDTQEITRGTVKLLREFLDEYNEADQ
LIE-V--N----K-V--YY---FSKGTLK--IA---NKQ--F-TA-VK-NDY-E-M--TF
 ||    |                ||  |  ||    |   | |  |   |  |     |
VIENLQRNELTPREIADFIGRELAKGKKKGDIAKEIGKSPAFITQHVTLLDLPEKIADAF
N----------NE--TSV--MP--CE----DD-HHLP--TVQ-F-DFTG-IDD-LENKSK
|          ||  |     |   |    ||       ||     |    |   ||   
NTGRVRDVTVVNELVTAFKKRPEEVEAWLDDDTQEITRGTVKLLREFLDEADQVIENLQR
DSL----V-DIIG--ICK-SYE-D-A--T-K----IT--V-------R-SN--N----R-
  |      | ||    |     | |    |    ||  |             |    | 
NELTPREIADFIGRELAKGKKKGDIAKEIGKSPAFITQHVTLLDLPEKIADAFNTGRVRD
-----E-V-A--KR--NI--YLMDTSGKVV--TATLWGE--D--ADK-FDG-SR-Q--P-
     | | |  ||       | |        |  |  |  |  ||       |    | 
VTVVNELVTAFKKRPEEVEAWLDDDTQEITRGTVKLLREFLDNEADQVIENLQRNELTPR
VLA--I-----KGARVSDFG---GRS---LS--V--LS-SSTII-A-NP----DIP---E
  |  |     ||    |     | |       |  |     |  | |     |     |
EIADFIGRELAKGKKKGDIAKEIGKSPAFITQHVTLLDLPEKIADAFNTGRVRDVTVVNE
---AYKLR-----GWF--DA-E---G----------Q
   | | |      |   |  |   |           
LVTAFKKRPEEVEAWLDDDTQEITRGTVKLLREFLDE
1jmc 1r71  100  238  457  42.02  21.88
KVVPIASLTPYQSKWTICARVTNKSQIRTWSNSRGEGKLFSLELVDESGEIRATAFNEQV
   |       |   |  |   |               || |       | |        
-MHPFVK-A-LQEHFT--AH-QNPEKAEPMARYMKNHFLF-LG-I-QTPE-RRQLLKD-I
DKFFPLIEVNKVYYFSKGTL-KIANKQFTAVKNDYEMTF--N-NETSVMPCEDDHHLPTV
     |    |        |       | |   |         |||   |        | 
IQIHTLPD-QKDFQIIIRELWDLPEREFQAAALDIMQKYKKHINETHI-PFLEE-LIVTK
QFDFTGIDDL-ENKSKDSLVDIIGICKSYEDATKITVRSNNREVAKRNI-YLMDTSGKVV
       |        |           |    |    | |       |        |  
SW-WDSVDSIVPTFLGDIFLKHPELISAY--IPK-WIASDNIWLQRAAILFQLKYKQKMD
TATL-W--GE-DADKFDGSRQPVLAIKGARVSDFGGRSLSVL-S--SSTIIANP-DIPEA
   | |  |     |     |   || |            |          | |    ||
EELLFWIIGQLHSSK-EFFIQK--AI-GWVLREYAKTNPDVVWEYVQNNELA-PLSKREA
YK-LR-GW-FDAEGQ
 |          |  
IKHIKQNYGINNE-K
1jmc 3jx7   44  238  231  18.49  19.05
KVV---PIA-S-L--T-PYQS-K--W-TIC-A----R----V--T--NKS---QI----R
 |      |   |  |  ||       ||  |    |    |  |   ||   ||     
EVYSQETLAKQVLQETFGYQQFRPGQATIIDAVLEGRDCLVVMPTGGGKSLCYQIPALVK
T--W---SN--S--R---GE----G---K-L--F-SL-E----LVD-ESGEIRATAF-NE
|      |   |            |     |    |  |    |     |  |      |
TGLTIVVSPLISLMKDQVDQLLANGVAAACLNSTQSREEQQAVLAGCRTGQVRLLYIAPE
Q--VDKF-----F-PL--IEVNKVYYFSK-G-TLK---IA--N-K-QFTAVK-NDYEMTF
    | |        |    |      |  |        |       | ||       | 
RLMMDNFIDTLGYWDLAMVAVDEAHCISQWGHDFRPEYAALGQLRARFPAVPFMALTATA
NNET--S-V----M--P-CE-DDHHLPTVQF---D-FTGIDDL-----E--NKS---K-D
   |    |       |  |      |         |   | |     |   ||      
DDTTRRDIVRLLGLDDPLIEISSFDRPNIRYMLMEKFKPLDQLMRYVQEQRGKSGIIYCN
S-L-V-D--I-I---GI-CKSY----E-D--AT---K-------I---TV---RS-N--N
|   | |        ||    |    |    |    |       |   ||      |  |
SRAKVEDTAARLQSRGISAAAYHAGLEHEVRASVQEKFQRDDLQIVVATVAFGMGINKPN
-R-EV---AKRNI---Y----------L----M------D-T---------S-G------
 |  |     |||   |          |    |      |             |      
VRFVVHFDIPRNIESYYQETGRAGRDGLPAEAMLFYDPADMAWLRRCLEEKAPGPLQDIE
--KV--V---T-A-T------L-W-GE---------D-A-D---KFDG--------S---
  |         | |      |   ||         |   |     ||        |   
RHKLNAMGAFAEAQTCRRLVLLNYFGEGRQAPCGNCDICLDPPRRYDGLVDAQKALSAIA
R--Q----P-VL-AIKGA---RV---S-D----FG-GR--S----LSV---L-SSSTI--
|  |      |     ||   |      |     | ||  |     ||   |        
RVEQRFGMGYVVEVLRGANNQRIRELGHDKLKVYGIGRDQSQEHWVSVIRQLIHLGVVTQ
-IA--NP-DIPEAYK--LRG---WFDAEGQ
 ||        ||    |||      |   
NIAQHSALQLTEAARPFLRGEAPLMLAVPR
1jmc 4tmu  106  238  510  44.54  20.78
KVV-PI-A-SLTP-YQSKWTICARVTNKSQIRTWSNSRGE-GKLFSLELVD-ESGEIRAT
           |  |  |          |          |         |    |     
VILTQLNEDGTTSNYFDKRKL--KIAPRSTLQFKVGPPFELVRDY-CPVVESHTGRTLDL
AFNEQVDKFFPLI--E-VN-KVYYFS-KGTLKIANKQF-TAVKNDYEMTFNNETSVM-PC
      |  |  |  | |  |  ||    |   ||    |  |           ||    
RIIPRIDRGFDHIDEEWVGYKRNYFTLVSTFETANCDLDTFLKSSFDLLV-EDSSVEGRL
EDDHH-LP-TVQ--FDFTGIDDLENKSK-DSLVDII-GICKSY-EDATK-ITVR-SNN-R
               | | |       | |         |        |  | |   | |
RVQYFAIKIKAKNDDDDTEINLVQHTAKRDKGPQFCPSVCPLVPSPLPKHQTIREASNVR
EVA--KR--N-IYL-MD-TS-GKV-VTATLWG--EDA-DKFDG-SR-QPVLAIKGARVSD
     |      ||  |        |   |    ||   |     | |    |     | 
NITKMKKYDSTFYLHRDHVNYEEYGVDSLLFSYPEDSIQKVARYERVQFASSISVKKPSQ
FGGR-SLSVLSSSTIIANPDIP--E-A----------Y----K---L--RG-W-FD-AEG
     || |         | ||  | |          |    |   |  ||      |  
QNKHFSLHVILGAVVDPDPGIPYDELALKNGSKGMFVYLQEMKTPPLIIRGRSPSNYASS
Q
|
Q
1jmc 2etw   61  238  297  25.63  20.54
KV-VPIASLTPYQSKWTICARVTNKSQI-R-TWSNSRGEGKLFSLELVDESGEIRATAFN
           | |     ||        |       |   |   |              
ELHFNLELVETYKSN-SQKARILTEDWVYRQSYCPNCGNNPLNHFENNRPVADFYCNHCS
EQVD-KFFP--LIE-VNK-VY-YFSKGTLKIANKQ--F-TAVKNDYEM-TF--NNETSVM
|    |          |   |    |      |    | |  ||  |   |       | 
EEFELKSKKGNFSSTINDGAYATMMKRVQADNNPNFFFLTYTKN-FEVNNFLVLPKQFVT
PCE-DDHH-L-PTV-QFDFTGID-DLEN-KSKDSLVDI-IGICKSYEDATK-I-T-VRSN
|        | ||       |   ||    ||        |     |  ||         
PKSIIQRKPLAPTANRAGWIGCNIDLSQVPSKGRIFLVQDGQVRDPEKVTKEFKQGLFLR
NREVAKR--NIYLMDTSGKVVTATLWGEDADKFDGSRQPVLAIKGARVSDFGGRSLSVLS
      |   |       |        ||   |          |         |    | 
KSSLSSRGWTIEILNCIDKIEGSEFTLEDMYRFESDLKNIF-VKNNHIKE-KIRQ-Q-L-
SSTIIANPDIPEAYKLRGWFDAEGQ
   |     | |  | ||       
-Q-ILRDKEIIE-FKGRGKY-RK-L
1jmc 4kyw   49  238  253  20.59  19.37
KV-VP-IASLTPYQSKWTIC----A--RV----TN-K--SQI-RTWS----N--S-R-G-
      |  |     |   |    |           |  | |    |    |      | 
SLRSDLINALYDENQKYDVCGIISAEGKIYPLGSDTKVLSTIFELFSRPIINKIAEKHGY
---EGK----L--FSL----E----L-VD-E----S--GE-IR----A-TAF--NEQVDK
   | |       | |    |       |          | |       | |  |     
IVEEPKQQNHYPDFTLYKPSEPNKKIAIDIKTTYTNKENEKIKFTLGGYTSFIRNNTKNI
FFPLIE-V-N-KV-Y-Y--F-S-KGTLK---I--AN---KQFTAVK---ND-Y----EM-
  |           | |      |  ||   |   |   |    ||    |         
VYPFDQYIAHWIIGYVYTRVATRKSSLKTYNINELNEIPKPYKGVKVFLQDKWVIAGDLA
----TFN---------N--E-TSVMPCED---DH--HLP-TVQF--D-FTGIDDLEN---
    | |            |       ||   |       | |   |    |    |   
GSGNTTNIGSIHAHYKDFVEGKGIFDSEDEFLDYWRNYERTSQLRNDKYNNISEYRNWIY
---KS-K-D---SL------VDIIG-I-C--KSYE-DA-TKI--TV-R--SN---NR--E
   ||   |    |       |  | |    | |     ||   |     |    |   |
RGRKSLRSDLINALYDENQKYDVCGIISAEGKIYPLGSDTKVLSTIFELFSRPIINKIAE
-----V--AK-RNIY----LMDTS--G-KV-V-TATLW-G-EDAD-KF--DG--S--R--
     |   |  | |    |   |    |      |     |    ||   |  |  |  
KHGYIVEEPKQQNHYPDFTLYKPSEPNKKIAIDIKTTYTNKENEKIKFTLGGYTSFIRNN
-Q----P---VLA--IKG---ARV----SD---F--G--G------RSLSV-LSSS-TI-
      |     |  | |    ||    |                     | |     | 
TKNIVYPFDQYIAHWIIGYVYTRVATRKSSLKTYNINELNEIPKPYKGVKVFLQDKWVIA
--IA---N-PDI-P-EA-YK--L--RG-----------W--F--------D-----AE--
   |   |   |    | ||      |           |           |      |  
GDLAGSGNTTNIGSIHAHYKDFVEGKGIFDSEDEFLDYWRNYERTSQLRNDKYNNISEYR
-----G-Q
     |  
NWIYRGRK
1jmc 1b94   95  238  488  39.92  19.47
KVVPIASLTPYQSKWTICARVTNKSQIRTWSNSRGEGKLFSLELVDESGEIRATAFNEQV
     |       | |   ||       |   ||        ||       | |    | 
EEW-FAA-R-L-GKVT-ASRV---ADVMTKAASR-Q-N-YMAELI--C-Q-RLTG-T-Q-
DKFFPLIEVNKVYYFSKGTLKIANKQFTAVKNDYEMTFNNETSVMPCEDDHHLPTVQFDF
       | |       ||         |     | |    | |     | | ||    |
-------EINAA--MQRGT-EL-EPHARA-RYIIE-TGEIVTEV-GL-ID-H-PTIA-GF
TGIDDLENKSKDS-LVDIIGICKSYEDATKI-TVRSNNREVAKRNIYLMDTSGKVVTATL
 |         |  |   |  |      | | |            |  | |     |   
-GASP-DGLVGDTGLIE-IK-CPN--TWTHIETIKT-GKP-KPEYIKQMQTQ-MACTGRQ
WGEDADKFDGSRQP-VLAIKGARVS-DFGGRSLSVLSS-STIIANPDIPEAYKLRGWFDA
|  |    |  | |        |   |            |   |       | |     |
WC-DFVSYD-DRLPDDMQYFCTRIERD-DALIAEIETEVSAFLAELEAEIEY-LKR-KAA
EGQ
   
KLA
1jmc 3sz5   51  238  193  21.43  26.42
-KVVP--IAS-L-TPYQ-SKWTICARV-TNKS-Q--IRT-WSNS-R-GEGK-L-FS-L-E
    |  |     |     |      |                            | |  
ARFPPARIKKIMQTDEEIGKVAAAVPVIISRALELFLESLLKKACQVTQSRTMTTSHLKQ
LVDESGEI-RATAFNEQVDKFFP-L-I-----E--VN---K-VYYFSKGTLKIANK-Q-F
       | || | |       |         |  ||         |     | ||    
CIEDDLTIPRA-AINKMIKETLPNVRVANDARELVVNCCTEFIHLISSEANEICNKSEKK
T-AVKN--D-YE-MTF-N--NET-SVM-PCED---DHHLPTVQFDFTGI--DD-L----E
|          |   |     |   |   |                 ||     |    |
TISPEHVIQALESLGFGSYISEVKEVLQECKTVALKRRKASSRLENLGIPEEELLRQQQE
--NKSK--DS-LV--D-I---I-GICKSYED--AT-----K--I-TV--RSNNREV-AKR
   |       |           ||         |     |    |   |  | |   ||
LFAKARQQQAELAQQEWLQSHMSGIVPQLQNIVSTVNLGCKLDLKTIALRARNAEYNPKR
--NIYL-M-D---T-----SGKVV-T-A-----T-L----W-------GEDA---D-KF-
             |     ||| | | |       |            |  |   | |  
FAAVIMRIREPRTTALIFSSGKMVCTGAKSEEQSRLAARKYARVVQKLGFPAKFLDFKIQ
D--GS---RQPV-L-A-I-KGARV-S---D-FGG---RSLS---V-L---SSSTIIANPD
   ||     |  |           |     | |   |      | |   |         
NMVGSCDVKFPIRLEGLVLTHQQFSSYEPELFPGLIYRMIKPRIVLLIFVSGKVVLTGAK
I-PEAYK-LRGWFD-AEG--Q-
   | |           |    
VRAEIYEAFENIYPILKGFRKT
1jmc 1jfi   68  238  381  28.57  17.85
-------KV-VP-I-AS--L-TP-----YQ-SK-W---------T---I-CA--------
           |    |  |  |     |     |         |      |        
SSTPSHPRMPKPHVFHSHQLQPPQLKVLYEKERMWTAKKTGYVPTMDDVKAAYGDISDEE
---------RVT-NKSQ-I-------RT-W-S------N----------S-R-G------
             | ||            | |      |          |   |      
EKKQKLELLKLSVNNSQPLTEEEEKMKADWESEGFTNWNKLEFRKFITVSGKYGRNSIQA
---E---GK-L---------F-S-LELV-D-E------SG--E-I-R------A-----T
   |   || |         | |  |   | |          | | |      |      
IARELAPGKTLEEVRAYAKAFWSNIERIEDYEKYLKIIENEEEKIKRVKMQQEALRRKLS
----A-F-----------N-----EQVDKF-----FP--L----I-E-V-NKV-------
      |           |     |  | |     |   |      | |           
EYKNPFFDLKLKHPPSSNNKRTYSEEEDRFILLMLFKYGLDRDDVYELVRDEIRDCPLFE
--YYF-S------------------K----G------T---L-K------I--A----N-
   || |                  |    |      |     |         |    | 
LDFYFRSRTPVELARRGNTLLQCLEKEFNAGIVLDDATKDRMKKEDAHEQVEPALIPSNW
-----------K-QFTAV---KN-D-----Y--E----MTF-N-----------N-----
           | |       ||       |       | | |           |     
TSVIPLLTSDFKNQYSVISRLKNPNMKPVPYAGDIIKLMAFINKFSSFFHSDLQNLSFQD
-ETSV-M----P----C------EDDH-HL-P---T----V--Q------F----D--FT
 |         |           ||    | |        |  |      |    |  ||
FEVGLDLYPGDPNGSAAGIVKGPEDTSLLLYPDFMAIKDIVYCQDKMNLLFLSLLDLTFT
-GID--D------L---EN-K--SKD--S--L--VDII----G--------------IC-
   |         |   || |  ||   |  |          |              |  
ENFDGKSAKKKGPLTTWENLKSSSKKVFSNPLYRLRLVAREWGYPREWRQQLPSDQDISK
-K-S-YE-D-AT--------KI-T--V-----------RSN---NRE-----V-A-K---
 |    | |  |         | |               ||   |||       | |   
PKTALFEQDEQTPVVDPSHPEILTPNIYTWNANEPLPLESNPLYNREMDKNGILALKPMD
-----R--------------N-IY-L-----------------------MD-T-------
     |                || |                        | |       
RVVLLRALTDWCASHSSAIHDEIYKLTHGKKDPVFGIQTQQVPRYTIEGVDNTINQFKKL
-----------S-----------G-------K--V---V-----TA----------TL--
           |           |       |             |           |  
CSLIQSRYEIRSKKKHFVKQLKEGKKPDLSRKLEILKEIKAELKNAVKSEKDELLFSLYD
-W-----GE--D---A----D---K------F--------D---------G-----S---
 |     ||  |   |        |      |        |         |     |   
KWVPLFEGELPDQPLANPFSERLYKLRLQEFFLGRVPHIGDFYMPRLHSYGDSLEMSTFT
--R--QPVL---------A--I-K--G----A--RV------S---DFG-GRSLS--V--
  |  |  |         |       |    |          |   |   ||  |  |  
DLRNLQALLSKFKNNEYNAFTLFENDGQSMSAQFKLFYHDTPSLAHDVARGRNTSGKVYW
--L--SSST-----------II---------A--NPDI-----P-EA-Y-----K---LR
  |   | |           |             || |     |  | |     |   | 
YELCHDSATLLEFLEFLDYKIVKPQDEKKETTDNNPSINTNPLPKDAKYNTARKKLQILK
---G--W-----FD------AE---G---------Q-----
            |       |    |         |     
EFLSDYYFILRQFEQMKVQFADMKPGKRQLRRIQRQTVNYN
1jmc 2y9z  141  238  881  59.24  16.00
---K---VVP-IASLTPYQ-S-KW--TICARVTNKSQIR-TWSNSRG-EG-K-LFSL-EL
   |       |        | |        |        |  |    |  |        
EDFKEGYILGFIEAEGSFSVSIKFQRDVFGGVRLDPVFSITQKNREVLEAIKEHLGIGRI
VDESGE----IRAT-AFNE--Q-V---DKF--FPLIEVNK-VYY--FSKGTL--K-I-AN
    |           |||         |   |                |         |
MEKAGQPNTYVYVVDNFNELVKLINFLNKYADFMIVKKRQFLMFREIANGLVNGEHLHIN
KQFTAVKNDYEMTFNNETSVMPCEDDHHLPTV-QF-----DF-TG-I-D--DLE-N-K-S
     ||  || |   |         | |           ||  | |      |     |
GLKRLVKLAYELTKESEKGYRKYDLNHVLSIIDKWDLGEEDFKEGYILGFIEAEGSFSVS
-K---D---SL-VD-IIGIC-KSYE--DATKITVRSNN-REVA-KRN--IYLMDTSGKVV
 |   |       |    |  |  |   | |         | |   |   |  |     |
IKFQRDVFGGVRLDPVFSITQKNREVLEAIKEHLGIGRIMEKAGQPNTYVYVVDNFNELV
-TATLWGEDAD-KFDGSRQPVL--AIKGARVS-D---FGG--R--SLSV-LS-SSTI-IA
         ||      ||      |    |        |  |   |   |   |     
KLINFLNKYADFMIVKKRQFLMFREIANGLVNGEHLHINGLKRLVKLAYELTKESEKGYR
NPDIPEAYK-LRGWFDAEGQ
  |          | |  | 
KYDLNHVLSIIDKW-DL-G-
1jmc 3e54   60  238  317  25.21  18.93
KVVPIASLTPYQSKWTICARVTNKS-QIRTWSNSR-GEGKLFSLELVDESGEIRATAFNE
         | |    || |    |    |      || | |        |  |  |   
-------MKPFQCR--ICMRNFSRSDHLTTHIRTHTGE-KPFACD-I--CG--RKFARSD
QVDKFFPLIEVNKVYYFSKGTLKIANKQFTAVKNDYEMTFNNETSVMPCEDDHHLPTVQF
   |                  |         || |     ||            |   |
E-RKRH-R-DIQHILPILE-D-KV--EELLS-KN-YHL--ENEVARLKKLVGEMKP---F
DFTGIDDLENKSKDSLVDIIGICKSYEDATKITVRSNNREVAKRNIYLMDTSGKVVTATL
    |    | |  |  |           | |  |    |  |      |  |    |  
Q-CRI-CMRNFSR-S--D--HL--T----THI--RTHTGE--K-P-FACDICGRKF-AR-
WGEDADKFDGSRQPVLAIKGARVSDFGGRSLSVLSSSTIIANPDIPEAYKLRGWFDAEGQ
   |  |     |  | |      |     |  ||      |     |  |         
--SDERKRHRDIQHILPI----LED-KVEEL--LSKNYHLEN-EV--A-RLKK-L-V---


1jmc 1llm   48  238  172  20.17  27.91
----------------K----V------VPIAS-LT--P-----YQ---S--K---W-T-
                |           ||  | |   |          |  |     | 
RLARENHSEIERRRRNKMTAYITELSDMVPTCSALARKPDKLTILRMAVSHMKSLSFLTD
----------------I--C--AR-------VT---N----K---S----Q-----I---
                |  |   |       ||   |        |    |         
QELKHLILEAADGFLFIVSCETGRVVYVSDSVTPVLNQPQSEWFGSTLYDQVHPDDVDKL
R---TWS-NS-----R-G-------E--G--K--LFSL-EL-VDE--S--G-E-I-----
|     |  |     | |          |  |  |     | | |  |    | |     
REQLSTSRRSFICRMRCGTPHFVVVHCTGYIKFCLVAIGRLQVTEFISRHNIEGIFTFVD
-R--AT-AFN-EQ-VDK-F--F--P----LI-----E-VN-K-----VYY-F-SK-GT-L
 |  ||          |    |  |    |        |  |     |   | ||    |
HRCVATVGYQPQELLGKNIVEFCHPEDQQLLRDSFQQVVKLKGQVLSVMFRFRSKTREWL
KIANKQFTAVKNDY--EMTF----N-N----------ETS--VMPC----E-D---D--H
      ||   | |  |       | |          | |     |    |        |
WMRTSSFT-FQNPYSDEIEYIICTNTNVKRSSSELRKEKSRDAARCRRSKETEVFYELAH
H--LP-TV--QFD----------F--T-G-IDDL--ENKS--K-DSLVD---I--I-G-I
   ||  |    |          |  |         || |    |   |        | |
ELPLPHSVSSHLDKASIMRLAISFLRTHKLLSSVCSENESEAEADQQMDNLYLKALEGFI
C---K--S--Y--EDATK---IT-V----RS--------NN---RE---VA-KRNIYL-M
             |   |    | |     |             ||       |     |
AVVTQDGDMIFLSENISKFMGLTQVELTGHSIFDFTHPCDHEEIRENLTLSTERDFFMRM
--D-TS-GK-V-V-TAT---L--WG--------------E--------D--AD-K-F---
    |  |  |    ||   |   |              |        |   | | |   
KCTVTNRGRTVNLKSATWKVLHCTGQVRVYNLSCLIIMCEPIQHPSHMDIPLDSKTFLSR
---D------GSR--Q-----P--VL---AIK--GA----RV--S--DF---G----G--
   |        |        |   |   |     |        |       |    |  
HSMDMKFTYCDDRILELIGYHPEELLGRSAYEFYHALDSENMTKSHQNLCTKGQVVSGQY
RSLS-----V-L-SSSTIIAN--PD-IP-EAY---KLRG--WFDA-EGQ
| |      | |    | | |  |  |    |          |      
RMLAKHGGYVWLETQGTVIYNLQPQCIMCVNYVLSEIKNDVVFSMDQTE
1jmc 4zpk  111  238  588  46.64  18.88
----------------------------------K--VV----P----I--A--S-LTPY
                                  |  ||    |       |    | | 
EMLRKAVGKGAYEMAYSQQENALWLATSQSRKLDKGGVVYRLDPVTLEVTQAIHNDLKPF
--------QSKW---T----I-C--A-------R-V-TN-K-S-QI-----R--------
        |  |   |         |       | |    |          |        
GATINNTTQTLWFGNTVNSAVTAIDAKTGEVKGRLVLDDRKRTEEVRPLQPRELVADDAT
-T------------W-----------S--N----SRG-----EGK-LF--SL--EL--VD
 |            |              |    | |     ||| |       ||   |
NTVYISGIGKESVIWVVDGGNIKLKTAIQNTGKMSTGLALDSEGKRLYTTNADGELITID
--E----S-------G-E-----I-------R--------A------T------------
       |       | |     |       |        |      |            
TADNKILSRKKLLDDGKEHFFINISLDTARQRAFITDSKAAEVLVVDTRNGNILAKVAAP
---A--F----NE------Q-----V-D-K-F-----F-----P-----------L----
   |  |    ||      |     | | |       |     |           |    
ESLAVLFNPARNEAYVTHRQAGKVSVIDAKSYKVVKTFDTPTHPNSLALSADGKTLYVSV
------------------I--E-----V-------------N-------------K---V
                  |  |     |             |             |   |
KQKSTKQQEATQPDDVIRIALEMLRKAVGKGAYEMAYSQQENALWLATSQSRKLDKGGVV
Y-------------------Y------------F-----S------------KG------
|                                |     |            ||      
YRLDPVTLEVTQAIHNDLKPFGATINNTTQTLWFGNTVNSAVTAIDAKTGEVKGRLVLDD
---T----------L---------------K-----------I----A--N--K------
   |          |               |           |    |  |  |      
RKRTEEVRPLQPRELVADDATNTVYISGIGKESVIWVVDGGNIKLKTAIQNTGKMSTGLA
---Q----F------------TA---V----------K-----N---D------Y-----
                     ||              |     |   |            
LDSEGKRLYTTNADGELITIDTADNKILSRKKLLDDGKEHFFINISLDTARQRAFITDSK
--E-M---T------------------FN---NE---T-------------S---V----
  |     |                  ||   ||   |             |   |    
AAEVLVVDTRNGNILAKVAAPESLAVLFNPARNEAYVTHRQAGKVSVIDAKSYKVVKTFD
----------------M----------------P----------------------C---
                                 |                          
TPTHPNSLALSADGKTLYVSVKQKSTKQQEATQPDDVIRIALEMLRKAVGKGAYEMAYSQ
-E-------------D--------D----------HH-L-P---TV----Q---F-----
 |             |        |          |  | |   |     |   |     
QENALWLATSQSRKLDKGGVVYRLDPVTLEVTQAIHNDLKPFGATINNTTQTLWFGNTVN
------DF-T----G--I-DD---------L---E-------NK---S---KDS-L--VD
      |  |    |    ||         |   |       |    |   | |    ||
SAVTAIDAKTGEVKGRLVLDDRKRTEEVRPLQPRELVADDATNTVYISGIGKESVIWVVD
---I-----I--------GIC-----KS-Y------E----D-A----------------
   |     |        |       |  |      |    | |                
GGNIKLKTAIQNTGKMSTGLALDSEGKRLYTTNADGELITIDTADNKILSRKKLLDDGKE
---------T---K--IT---------V--RS-N---------------N--R-E--V--
         |      ||         |  |  |               |  | |  |  
HFFINISLDTARQRAFITDSKAAEVLVVDTRNGNILAKVAAPESLAVLFNPARNEAYVTH
--A-KRN-I----Y-LM---D--T-------S--GK---V-V----T----AT-------
  | |   |    |      |  |       |  ||   | |    |    ||       
RQAGKVSVIDAKSYKVVKTFDTPTHPNSLALSADGKTLYVSVKQKSTKQQEATQPDDVIR
--------------------------LW------------G---E-D--------A---D
                          ||            |     |        |   |
IALEEMLRKAVGKGAYEMAYSQQENALWLATSQSRKLDKGGVVYRLDPVTLEVTQAIHND
-K--------------F-----------D-------G---------S---R--QP-----
 |              |           |       |             |  ||     
LKPFGATINNTTQTLWFGNTVNSAVTAIDAKTGEVKGRLVLDDRKRTEEVRPLQPRELVA
------V-LA-I-K---------G------A-----RVS-----D------F-----G--
      |    | |         |      |       |     |            |  
DDATNTVYISGIGKESVIWVVDGGNIKLKTAIQNTGKMSTGLALDSEGKRLYTTNADGEL
-------------------GR-------SL-----------S----VL---S-SSTIIAN
                   |        ||           |    ||        | | 
ITIDTADNKILSRKKLLDDGKEHFFINISLDTARQRAFITDSKAAEVLVVDTRNGNILAK
---PD---I---P---EAY-------K---L--RGW-----FD-----------AEG---
   |        |   |||       |              ||           | |   
VAAPESLAVLFNPARNEAYVTHRQAGKVSVIDAKSYKVVKTFDTPTHPNSLALSADGKTL
---------------Q---------
               |         
YVSVKQKSTKQQEATQPDDVIRIAL
1jmc 3vh0  172  238 1285  72.27  13.39
KVVPIASLTPYQSKWTIC-ARVTN--KSQI-RTWSN-S-R-GEG-KLFSL-ELVDE-SGE
    |     |          |    |          | |     |     |        
SQGVIGIFGDYAKAHDLAVGEVSKLVKKALSNEYPQLSFRYRDSIKKTEINEALKKIDPD
IRATAF--NEQVDKFFPLIEVNKVYYFSKGTLKIANKQFTAVKNDYEMTFNNETSVMPCE
   | |  |          || |  |        |       | |      |   |    
LGGTLFVSNSSIKPDGGIVEV-KDDYGEWRVVLVAEAKHQG-K-DI-INIRNGLLVGKRG
D-D-HHL-PTVQFDFTGIDDLEN-KSKDSLVDIIGICKSYEDATK-ITV-RSNNREV-AK
| |              |    |     |              |  |   |   | |   
DQDLMAAGNAIERSHKNISEIANFMLSESHFPYVLFLEGSNFLTENISITRPDGRVVNLE
RNIYLMDTSGKVVTATLWG----ED-A-DKFDGSRQPVLAIKGARVSDFG-GRSL-SVLS
 |           ||   |          ||            |     | ||   |   
YNSGILNRLDR-LTAANYGMPINSNLCINKFVNHKDKSIMLQAASIYTQGDGREWDSKIM
SSTIIANPDIPEAYKL-RGWFD-AEGQ
   |           | |  |      
FE-IMFDISTTSLRVLGRDLFEQLTSK
1jmc 1ckq   45  238  261  18.91  17.24
KVVPIASLTPYQSKWTICARV-TNKSQIRTWSNSRGEGKLFSLELVDESGEIRATAFNEQ
  |       |         | | |     |   |  ||  |    |  |     |  | 
-MVKV-KF-KYKGE-E--KEVDTSKIK-KVW---R-VGKMVSF-TYDDNGKTGRGAVSEK
VDKFFPLIEVNKVYYFSKGTLKIANKQFTAVKNDYEMTFNNETSVMPCEDDHHLPTVQFD
 |   |  |                |     |            |   |   |   | | 
-DA--PK-EL--LDMLARAE-R--EKK-GVLK---KL----R-AV---ENELHMVKVKFK
FTGIDDLENKSKDSLVDIIGICKSYEDATKITVRSNNREVAKRNIYLMDTSGKVVTATLW
  |    |   |   ||     |      |   |     |     |  |  ||  |    
YKG--E-E---KE--VD-TS--K-IK---KVW-RV-GKMVS-FT-Y--DDNGK--TGR--
GEDADKFDGSRQPVLAIKGARVSDFGGRSLSVLSSSTIIANPDIPEAYKLRGWFDAEGQ
|    | |      |    ||      |                    |||     |  
GAVSEK-DAPKE-LLDML-AR-AE---R--E--KKG--V----L-K--KLRA-VENELH
1jmc 1wvl   49  238  160  20.59  30.63
--------------------------------------------K------V---V--P-
                                            |      |   |  | 
VEGRFQLVAPYEPQGDQPQAIAKLVDGLRRGVKHQTLLGATGTGKTFTISNVIAQVNKPT
--I------A----S-L-------------T------P--Y--Q-----------S----
  |      |    | |                    |  |  |                
LVIAHNKTLAGQLYSELKEFFPHNAVEYFVSYYDYYQPEAYVPQTDTYIEKDAKINDEID
K--W--T----------I-----C-----A----R-----------VT----------N-
|     |          |     |          |           ||          | 
KLRHSATSALFERRDVIIVASVSCIYGLGSPEEYRELVVIFPASHFVTREEKMRLAIQNI
---------------K---SQ-I--RT-W-----------S---N-SR--G-E--GK---
               |    |    ||             |   | ||       |    
EQELEERLAELRAQGKLLEAQRLEQRTRYDLEMMREMGFCSGIENYSRHLALRPPGSTPY
--L--F--S-LELVDES------------G-----E--I----R---A------T--AF-
  |  |    |  ||||            |             |   |      |   | 
TLLDYFPDDFLIIVDESHVTLPQLRGMYNGDRARKQVLVDHGFRLPSALDNRPLTFEEFE
---N---------------------EQ-V------D-KF-F-P-------L---I-E-V-
   |                     ||        |      |       |   | | | 
QKINQIIYVSATPGPYELEHSPGVVEQIIRPTGLLDPTIDVRPTKGQIDDLIGEIRERVE
-N----------K----V--Y---------Y------------FSK-----G-T-LK---
 |          |       |         |              |     |   |    
RNERTLVTTLTKKMAEDLTDYLKEAGIKVAYLHERIEIIRDLRLGKYDVLVGINLLREGL
---------I--ANKQ-F---------T---AVKN-D-----Y-E-----M------T--
         |  | |  |         |   |  |       |       |      |  
DIPEVSLVAILDADKEGFLRSERSLIQTIGRAARNANGHVIMYADTITKSMEIAIQETKR
-------FN--N----ET------SV-----M--PCE---D---------D-------H-
        |        |       |        | |   |         |       | 
RRAIQEEYNRKHGIVPRTVKKEIRDVEGRFQLVAPYEPQGDQPQAIAKLVDGLRRGVKHQ
-----------------------------H-----------L----P--TVQ-F----D-
                             |           |    |   |  |    | 
TLLGATGTGKTFTISNVIAQVNKPTLVIAHNKTLAGQLYSELKEFFPHNAVEYFVSYYDY
-----F---TG--ID-D--L--E-NK------S-----KD--------------------
         |   |  |     |  |      |      |                    
YQPEAYVPQTDTYIEKDAKINDEIDKLRHSATSALFERRDVIIVASVSCIYGLGSPEEYR
----S---------------LVDI------I----------G----I--------C-K-S
    |               ||||      |          |    |        |    
ELVVSLRVGMEIERNALLRRLVDIQYDRNDIDFRRGTFRVRGDVVEIFPASRDEHCIRVE
-Y--------E-DA-T------K----I-------T----VR-S--N------NR--EV-
          | || |           |       |     |    |       |  |  
FFGDEIERIREVDALTGEVLGEREHVAIFPASHFVTREEKMRLAIQNIEQELEERLAELR
A--K------------------R---------N------I-------Y--L-------M-
|  |                  |         |              |  |         
AQGKLLEAQRLEQRTRYDLEMMREMGFCSGIENYSRHLALRPPGSTPYTLLDYFPDDFLI
--D----T--------SG----K-V-V---------------T---------------AT
  |    |         |    | | |               |               ||
IVDESHVTLPQLRGMYNGDRARKQVLVDHGFRLPSALDNRPLTFEEFEQKINQIIYVSAT
-----L-W--G--E---------D-A-D----K--F-D--G------SR-Q-P-V--L--
     |    |  |         |   |    |    |  |       |     |  |  
PGPYELEHSPGVVEQIIRPTGLLDPTIDVRPTKGQIDDLIGEIRERVERNERTLVTTLTK
--A------IK--G---A--RVS---D--FG------G----R--------SL-SVL-S-
  |       |  |   |        |   |      |    |        ||   |   
KMAEDLTDYLKEAGIKVAYLHIEIIRDLRLGKYDVLVGINLLREGLDIPEVSLVAILDAD
------S--S---TI---I--AN------PD-I--P-E-A-Y--K-LRG-W--FDAE-G-
      |  |   ||      ||       | |    | |    |  |          | 
KEGFLRSERSLIQTIGRAARNANGHVIMYADTITKSMEIAIQETKRRRAIQEEYNRKHGI
-------Q--
          
VPRTVKKEIR
1jmc 2fdc  156  238 1090  65.55  14.31
--KV-V-PIAS-LTPYQSKWTI--C--A-RVTNKSQIRTWSN-SRGEGKLFSLELVDESG
         |   |       |     | ||   ||  | |   |   |  |  |   ||
MEEINTKEVAQRITTELKRYSIPQAIFAQRVLCRSQ-GTLSDLLRNP-KPWS-KL--KSG
-E-IRAT-AFNEQVD-KFFPLIEVNK-VYY-FSKGTLKIANKQFTAVKNDYEMTFNNETS
 |  |                      |       ||    |           |      
RETFRRMWKWLQEPEFQRMSALRLPRLVFTDVQRRTLHAIFKENKRPSKELQITISQQLG
V-MPCEDDHHLPTVQFDFTGIDDLENKS-KDSL-VDI--IGICKSYEDATKITVRSNNR-
                          |              |      |     ||    
LELSTVSNFFMNARRRSLDKMEEINTKEVAQRITTELKRYSIPQAI-FAQRVLCRSQGTL
EVAKRN--IYLMDTSGKVVTATLWGEDADKFDGSRQPVLAIKGARVSDFGGRSL-SVL--
    ||        ||       |          |   |        |   | |      
SDLLRNPKPWSKLKSGRETFRRMW-KWLQEPEFQRMSALRLPRLVFTDVQRRTLHAIFKE
S---SSTI-IA-NPDIP-EAYKLRGWF-DA--EG--Q
    |    |        |       |  |       
NKRPSKELQITISQQLGLELSTVSNFFMNARRRSLDK
1jmc 2d5v   43  238  270  18.07  15.93
KVVPIASLTPYQSKWTICARVTNKSQIRTWSNSRGEGKLFSLELVDESGEIRATAFNEQV
      |     |       | |  |        | |  |    |   |  |        
------S---H-S-----G-V-N--QL-------G-G-VF----V--NG--RPLPDSTR-
DKFFPLIEVNKVYYFSKGTLKIANKQFTAVKNDYEMTFNNETSVMPCEDDHHLPTVQFDF
       |       | |                     |      |     |       
QR---IVEL--A-H-S-GA-RPCD--ISRI---LQV--SN--G---CV-SKIL-G-RYYA
TGIDDLENKSKDSLVDIIGICKSYEDATKITVRSNNREVAKRNIYLMDTSGKVVTATLWG
||                |  |    ||   | |     |    |          |  | 
TG--SI--RPR-A-IG--G-SKP-RVATPEVV-S--K-IA-Q--YKQECP-SIF-A--W-
EDADKFDGSRQPVLAIKGARVSDFGGRSLSVLSSSTIIANPDIPEAYKLRGWFDAEGQ
|     |  |   |   |    |      ||  ||  | |        ||       |
E-I-R-D--R--LLS-EGVCTND--NIP-SV--SS--I-N-RV-----LRNLASEKQQ
1jmc 6pax   44  238  133  18.49  33.08
-KVVPIASLTPYQSKWTICARVTNKSQI-RTWSNSRGEGKLFSLELVDESGE-IRAT--A
 |                   |  | |     |    | |   |    |  |    |   
PKCIE-CHIN-IEMD-PVLHDVF-KLQVCKQCSKEHPE-K-YALLTKTECKEDYFLTDPE
FNEQVDKFFPLIEVN-KVYYFSKGTLKI-ANKQFTAVKN-DYEMTFNNETSVMPCEDD-H
 |   | |  |   |     |    |         | |    |     |      |   |
LNDE-DLFHRLEKPNPHSGTFARMQLFVRCEVEAFAFKKWGGEEGLDEEWQRRE-EGKAH
HLP-TVQFDFTGIDDLENKSKDSLVDIIGICK--SYEDATKITVRSNNREVAKRNIYLMD
  |         |        |        ||  | |   |        |  |   |   
RAPKCIECHI-NI-EMDPVLHD-VFK-LQVCKQCSKEHPEKYALLTKT-E-CKED-YFL-
TSGKVVTATLWGEDADKFDGSRQPVLAIKGARVSDFGGRSLSVLSSSTIIANPDIPEAYK
|        |      |      |      ||   |                    |   
TDPELNDEDLF-HRLEK-P-N--PHSG-TFARMQLFVRCEVEAFAFKKWGGEEGLDEEWQ
LRGWFDAEGQ
 |    |   
RREEGKAHRR
1jmc 5a3d   45  238  228  18.91  19.74
KVVPI---ASL-TPYQS-KWTICARVTNKSQIRTWSNSRGEGKLFSLELVDE-SGEIRA-
   |                |   | |    |        |      |  |       | 
MKCPVCHQGEMVSGIKDIPYTFRGRKTVLKGIHGLYCVHCEESIMNKEESDAFMAQVKAF
TA-FN-EQVDKFFPLIEV-NKVYYFSKGTLKI--AN-KQFTAV-K-N-D-YEMTFN--NE
 |  | | |   |    |  |     |    |       |    | |      |      
RASVNAETVAPEF-IVKVRKKLSLTQKEASEIFGGGVNAFSRYEKGNAQPHPSTIKLLRV
TSVMP-CEDD-HHL--PTV-QFDF-TGIDDLE-N-KS-KDSLVDIIGI-CKSYEDATKIT
    |       |   |   |     || |        |  |  | |  |   |    | 
LDKHPELLNEIRHMKCPVCHQGEMVSGIKDIPYTFRGRKTVLKGIHGLYCVHCEE-S-I-
VRSNNREVAKRNIYLMDTSGKVVTATLWGED-ADKFDGSRQPVLAIKGARVSD-FGGRSL
    | |        |    |   |    |  |  |       |       |  |||   
M---NKE--ESDAF-M-AQVKAFRASVNAETVAPEFIVKVRKKLSLTQKEASEIFGG-GV
SVLSS-STIIANPDIPEAYKLRGWFD--AE--GQ--
   |      | |  |   ||    |   |      
NAFSRYEKGNAQPH-PSTIKLLRVLDKHPELLNEIR
1jmc 3o9x   57  238  263  23.95  21.67
------------------K-VV-----P-I------A------SL-----T---------
                  |        | |             |      |         
IQNMSLEDIMGERFGRYSKYIIQDRALPDIRDGLKPVQRRILYSMNKDSNTFDKSYRKSA
-----------P------Y----Q-SK-W-T--I----------------CA-RVTN-K-
           |      |      |  |    |                 | | |    
KSVGNIMGNFHPHGDSSIYDAMVRMSQNWKNREILVEMHGNNGSMDGDPPAAMRYTEARL
S-------Q-I--RT----W-----------------S---N-SRG-E-G--------KL
|       | |   |    |                     | | |   |         |
SEIAGYLLQDIEKKTVPFAWNFDDTEKEPTVLPAAFPNLLVNGSTGISAGYATDIPPHNL
--------F------S----L-E-L----------V---D------ES--G--------E
                    | | |              |      |   |        |
AEVIDAAVYMIDHPTAKIDKLMEFLPGPDFPTGAIIQGRDEIKKAYETGKGRVVVRSKTE
I------R---A-T--------A-----F------NE-----QV------D---------
|            |        |            |       |      |         
IEKLKGGKEQIVITEIPYEINKANLVKKIDDVRVNNKVAGIAEVRDESDRDGLRIAIELK
K-----------F-F-PL-I----E-V---N---K---V-----Y--Y----------F-
|           |    | |      |   |       |     |             | 
KDANTELVLNYLFKYTDLQINYNFNMVAIDNFTPRQVIVPILSSYIAHRREVILARSRFD
---S-K------G-----T-L-K----I-A--N----KQ-------FT-----A-V----
     |      |       |      | |  |    |        ||     | |    
KEKAEKRLHIVEGLIRVISILDEVIALIRASENKADAKENLKVSYDFTEEQAEAIVTLQL
-K--ND----------Y-E---M---------T-FN---NE-TSV---M-P----CED--
    ||            |   |         |  |    |   |     |     ||  
YRLTNDVVVLQEEEAELREKIAMLAAIIGDERTMYNLMKKELREVKKKFTPRLSSLEDAV
-----------D----HHL-----P-TV-Q-F-D-F--T----G---IDD--LE------
           |    |||        |     |    |    |     |   |      
RKRPGMYIGSTDGAGLHHLVWEIVDNAVDEALSDRIDVTINKDGSLTVQDHTVEVIFTIL
N---K------SK--D---S-L-V----D--I----I---G--------I--C-KS----
    |      |       | | |    |           |        |    ||    
HAGGKFLHGVGSSVVNALSSWLEVEITRDGAVYKQRFENGGKPVTTLKKIGTAPKSKTGT
---Y-EDA-----T--KI-TV--R---S-----N------N-R---------E----VA-
      ||     |  |  |   |   |     |        |         |    |  
KVTFMPDATIFSTTDFKYNTISERLNESAFLLKNVTLSLTDKRTDEAIEFHYEVQDFVSY
----K-----------R-N-----I---Y--------L-----M---D--T--SG-K-VV
    |             |         |        |         |  |   | |   
LNEDKEILTPVLYFEGEDNGFQVEVALQYNDGFSDNILSFVNNVRTKDGGTHETGLKSAI
T------A--T--L-------W--G----------------E----------------D-
|      |  |  |          |                |                | 
TKVMNDYARKTGLLKEKEGSDYREGLAAVLSILVPEEHLQFEGQTKDKLGSPLARPVVDG
--ADK---F--D-G---S-------------------R----Q---P----V-L-----A
  |||   |    |   |                   |    |   |      |     |
IVADKLTFFLMENGELASNLIRKAIKARDAREAARKARLTPAQSKNPAKNELYLVEGDSA
---IK-G------A----R--V--------SD-----------F----G-GR--SL---S
    | |      |    |  |         |                | |   |     
GGSAKQGRDRKFQAILPLRGKVINTAKAKMADILKNEEINTMIYTIGAGVGADFSIEDAN
-----VLS-SST----I----IA------NP--D-----I--P--EAY-----------K
           |    |             |        |  |   ||           |
YDKIIIMTDADTDGAHIQTLLLTFFYRYMRPLVEAGHVYIAPPLYKAYAWTDGELEELRK
L-R----G-------W---------------F-D---AE-------G----------Q--
| |    |       |                 |   ||       |             
LQRYKGLGEMNADQLWETTMNPETRTLIRVTIEDLARAERRVNVLMGDKVEPRRKWIEDN
----
    
VKFT
1jmc 4juo  149  238 1024  62.61  14.55
KVVPIASLTPYQSKWTICARVTNKSQI-RTWSNSR-GEGKL-FSLELVDESGEIRATAFN
     |                       | ||            || |     |     
-YM-VARMQKMKA-GNLGGAFKHNERVFETHSNKDINPSRSHLNYELTDR--D-RSVSYE
EQVDKFFPLIEVNKVYYFSKGTLKIANKQFTAVKNDYEMTFNNETSVMPCEDDHHLPTVQ
 |  |     | |||   |     |  |   ||  | |             |     |  
KQI-KDY-VNE-NKV---S-NR-AI-RKD--AVLCD-EWIITSDKDFFEKLDEEQTRT--
FDFTGIDDLENKSKDSLVDIIGICKSYEDATKITVRSNNREVAKRNIYLMDTSGKVVTAT
| |       |           |   |  |                       ||     
F-F---ETAKNYFAENYGE-SNI--AY--AS-VHLDESTPHM-HMGVVPFE-NGKLSSKA
LWGEDADKFDGSRQPVLAIKGARVSDFGGR-SLSVLSSSTIIANPDIPEAYKLRGWFDAE
    |           |       || |       | |          |  | |    | 
MF--DREELKHIQED-LP-R--YMSDHGFELERGKLNSEA--KHKTVAE-FK-RA-M-A-
GQ
  
--
1jmc 4lvl   42  238  195  17.65  21.54
KVVPIASLTPYQSKW--TICARVTNKSQIRTWSNSRGEGKLFSLEL-----VD--ESGEI
       |    | |  |                  |        |     |     |  
ALTNAQILAVIDS-WEETVGQFPVITHHVPLGGGLQGTLHCYEIPLAAPYGVGFAKNGPT
R---ATAFNEQVDKF----FP-LIEVNKVYYFSKGTLKIA-NKQ-FTAVKNDYEMTFNNE
|       |  |        | | |                |           |    | 
RWQYKRTINQVVHRWGSHTVPFLLEPDNINGKTCTASHLCHNTRCHNPLHLCWESLDDNK
-TSVMPCED-D--HHLPTV-QFD-F-TG--IDDLENK-SK--DSLVD--IIGICKSYEDA
     |       |      |      |          |     |    |     | |  
GRNWCPGPNGGCVHAVVCLRQGPLYGPGATVAGPQQRGSHFVVALTNAQILAVIDSWEET
T-KITVRSNNREV--A-KRNI--Y-L-MDTS-G-KVV-TA-TLWG-E-DADK-FD--GSR
     |                 |        |        | |             || 
VGQFPVITHHVPLGGGLQGTLHCYEIPLAAPYGVGFAKNGPTRWQYKRTINQVVHRWGSH
Q-P-VL-A--IKG--ARVSDF--GGR--S-LSVL-SS-STIIA-N----PD--IPEAYK-
  |  |    | |     |      |    |     |       |    |      |   
TVPFLLEPDNINGKTCTASHLCHNTRCHNPLHLCWESLDDNKGRNWCPGPNGGCVHAVVC
LR-G-WF--DA--EG--Q-------
|| |      |   |  |       
LRQGPLYGPGATVAGPQQRGSHFVV
1jmc 1a73   50  238  324  21.01  15.43
---K-VV-PIA-SL-TPY-QS-KWTIC--AR-VTNK---S-Q-I-R-----T---WSN--
             | | | ||        ||    |   |   | |         | |  
AHQRQTLYQLMDGLNTFYQQSLQQPVATSARQYLEKRGLSHEVIARFAIGFAPPGWDNVL
SR--G--E--------GKL------FS-L-E--L--V-DESGE-I----R--A--T-AF-
 |  |  |        | |           |       |  |  |    |     |    
KRFGGNPENRQSLIDAGMLVTNDRSYDRFRERVMFPIRDKRGRVIGFGGRVLGNDTPKYL
NE-QVD---K----F--F--------P---L-IE--VNKV----Y---Y-F-SKGTLKIA
|    |   |                |   |  |     |    |   |   | ||   |
NSPETDIFHKGRQLYGLYEAQQDNAEPNRLLVVEGYMDVVALAQYGINYAVASLGTSTTA
NK-Q--F--T--AV------K--ND--Y---E-----MT--------F--NNE---T---
   |  |  |              |      |     ||        |    |   |   
DHIQLLFRATNNVICCYDGDRAGRDAAWCALETALPYMTDGRQLRFMFLPDGEDPDTLVR
--------S-V---MP--C--------E-D----D-H-H-------L----P--TVQ-F-
              ||             |    |           |    |  |     
KEGKEAFEARMEQAMPLSAFLFNSLMPQVDLSTPDGRARLSTLALPLISQVPGETLRIYL
--DF-T--GI-DDLE-N---K-S--K--D--------SL---V---------------D-
        || ||   |           |        ||   |                 
RQELGNKLGILDDSQLNAHQRQTLYQLMDGLNTFYQQSLQQPVATSARQYLEKRGLSHEV
I----I-----G---ICKSY----E------DA-TKIT--V-RS-NN-RE-V----A-KR
|    |     |     |      |      ||    |    ||    || |      ||
IARFAIGFAPPGWDNVLKRFGGNPENRQSLIDAGMLVTNDQGRSYDRFRERVMFPIRDKR
-N-I-Y---LM--DT-----SGKV-V--TA-TLWG--E---D-AD--K------F-D---
   |         ||     |           | |  |   | |            |   
GRVIGFGGRVLGNDTPKYLNSPETDIFHKGRQLYGLYEAQQDNAEPNRLLVVEGYMDVVA
----G------S--RQ---P-V--L--A----I---KG--A-R--V--S-D----F--GG
    |      |            |  |    |    |  | |                |
LAQYGINYAVASLGTSTTADHIQLLFRATNNVICCYDGDRAGRDAAWCALETALPYMTDG
RSLS-V-L---SS-ST-I-----------------I-A---N---P--DI--PE--A-YK
| |    |       |                     |   |   |  |   |   |   
RQLRFMFLPDGEDPDTLVRKEGKEAFEARMEQAMPLSAFLFNSLMPQVDLSTPDGRARLS
-----L--R--G-----WFDAE-G-Q
     |     |         | |  
TLALPLISQVPGETLRIYLRQELGNK
1jmc 3b39  111  238  626  46.64  17.73
-KV--V--PIAS-----L----T-PYQ--------S-K-----W------T-IC--A--R
 ||      | |     |      | |        | |            |     |  |
MKVEELAESISSYAVGILKEEELFPPQAEAVEKVFSGKNLLLAMPTAAGKTLLAEMAMVR
--VT-NKS-Q-I--R--------T---W---------S--N--SRGE--G----------
      ||      |            |         |     || |  |          
EAIKGGKSLYVVPLRALAGEKYESFKKWEKIGLRIGISTGDYESRDEHLGDCDIIVTTSE
K---L------F----S-L---E--LVD-ES-G---EI------------R-----ATAF
|   |           | |   |  | | |  |   ||            |     ||| 
KADSLIRNRASWIKAVSCLVVDEIHLLDSEKRGATLEILVTKMRRMNKALRVIGLSATAP
N--E--Q-VD-KFF-------PLIE-V----N-KVY--YF--S---K-GTL--K-IA-N-
|  |     |           || | |            |  |   |   |     | | 
NVTEIAEWLDADYYVSDWRPVPLVEGVLCEGTLELFDGAFSTSRRVKFEELVEECVAENG
--KQF---------TAVK-N----DY---E-M--T-F--N-NETS--VMPC--ED-D-HH
    |         ||||       |   |         |  | |     |       ||
GVLVFESTRRGAEKTAVKLSAITAKYVENEGLEKAILEENEGEMSRKLAECVRKGAAFHH
--LPTVQ---F-D-F-TG-I------DDL-E--N--------KS--K-D--S--L-V---
  |   |     | |  | |        |    |         |    |  |    |   
AGLLNGQRRVVEDAFRRGNIKVVVATPTLAAGVNLPARRVIVRSLYRFDGYSKRIKVSEY
------------D------II-G-----IC-KSY---E-D-AT-K--I-T-VR--S-N--
            |      || |     |  | |   |    | |    |  |  |    
KQMAGRAGRPGMDERGEAIIIVGKRDREIAVKRYIFGEPERITSKLGVETHLRFHSLSII
-N---R---EV----A-----KRN-I---Y-L------MDTSGKVV--T--A-T------
         |     |     | | |   | |          | ||     | |      
CDGYAKTLEELEDFFADTFFFKQNEISLSYELERVVRQLENWGMVVEAAHLAPTKLGSLV
--LW-----G----------E--D--A--------D-------KFDG-----S---R-Q-
  |      |          |  |  |        |       | |          |   
SRLYIDPLTGFIFHDVLSRMELSDIGALHLICRTPDMERLTVRKTDSWVEEEAFRLRKEL
---P----V-----LA-IKGA---R--V----SD-----FG---G---R----S--LS--
   |    |     |   | |            |      |   |   |       ||  
SYYPSDFSVEYDWFLSEVKTALCLKDWIEEKDEDEICAKYGIAPGDLRRIVETAEWLSNA
---V---L--SS-S--T----------------I--I----A----NPDI--PE--A-Y-
           | |  |                |  |    |    |  |   |      
MNRIAEEVGNTSVSGLTERIKHGVKEELLELVRIRHIGRVRARKLYNAGIRNAEDIVRHR
-K---L--RGWFD--AEG---Q-
 |   |  ||      ||     
EKVASLIGRGIAERVVEGISVKS
1jmc 2p6r  134  238  683  56.30  19.62
KV---V--PI-ASLTPYQS--KWT-I-CARVTN-KS---Q--IRTW--SNSR-G--E-GK
|    |        |      |   |  |   |  |       |            |  |
KIQTYVNNNVYEQITDLVTIRKQEGIEEASLSNVSSMLLELGLRVYMIQQEKFNQMEYNK
L-F---S----L--E-L---V-D-E---SG--E---IR-A-TAF-NEQVDKFF-------
|     |       | |   |   |   ||      |  |   |  |||  ||       
LMLENVSRVRAMCTEILKMSVLNQESIASGNFDYAVIKPAIDKFAREQVSIFFPDDEDDQ
PLIE--V-NKVY-YFSK-GTL-K---I--A---N--K---Q--F-T-AV---K-----N-
| |   | | ||       |  |   |  |   |                  |     | 
PKIQTYVNNNVYEQITDLVTIRKQEGIEEASLSNVSSMLLELGLRVYMIQQEKREGGFNQ
-DY-----E-------M-T----FN--N-ET--S------VM-PCED----DH-HL--P-
  |     |       | |        | |   |      |  |  |           | 
MEYNKLMLENVSRVRAMCTEILKMSVLNQESIASGNFDYAVIKPAIDKFAREQVSIFFPK
--T-----V--QF-DF-T-----GIDD--LEN-KSK--D-SL-VDII-------GICK-S
  |     |  |  |  |     ||    | |  |      | |  |       |     
IQTYVNNNVYEQITDLVTIRKQEGIEEASLSNVSSMLLELGLRVYMIQQEKREGGFNQME
Y-----EDATKI----T-V-R-S-NNRE-VAKRNI-Y--L---MD------TS---GKVV
|     |         |     |  | |  |  |  |       |       |    |  
YNKLMLENVSRVRAMCTEILKMSVLNQESIASGNFDYAVIKPAIDKFAREQVSIFFPKIQ
T-A--TLWGE--D-AD--KFDG----SRQPV--LAIK-GARV-S--DFGG---RSLS-VL
|           |     |  |    |   |       | ||              | | 
TYVNNNVYEQITDLVTIRKQEGIEEASLSNVSSMLLELGLRVFNQMEYNKLMLENVSRVR
SSST-II--A--NPD-IPEA---YK-LRGWFD--A-EG-Q---
   | |      |   |      |       |  | |      
AMCTEILKMSVLNQESIASGNFDYAVIKPAIDKFAREQVSIFF
1jmc 3on0   96  238  463  40.34  20.73
K-VVPIASLTPYQSKW-TI-CAR--V-TN---KS-Q-IRTW-SNS--R--G--EGKLFSL
      || ||    |  | | |          | |  | |   |     |        |
MGHRTLAS-TP--ALWASIPCPRSELRLDLVLPSGQSFR-WREQSPAHWSGVLADQVWTL
----E-L---V---DESGEIRATAFN-EQVDKFFPL-IEVNKVY-YF-SKGT-L-KIANK
    | |   |   | |   | |    | | | | |       |    |        | |
TQTEEQLHCTVYRGDKSQASRPTPDELEAVRKYFQLDVTLAQLYHHWGSVDSHFQEVAQK
-Q-FTAVKND-YE-M-TF----NNETS-VM-PCED-DHHL-P-TVQF-DFT--GIDDLEN
 |       |  |    |    ||         |       |   |  | |  |   |  
FQGVRLLRQDPIECLFSFICSSNNNIARITGMVERLCQAFGPRLIQLDDVTYHGFPSLQA
KSKDSL-VDI--IGI-CKS-YEDATKITVRSNNREVA-KRNI--YLMDTSGKVVTATLW-
             |      |  |            |              |        
LAGPEVEAHLRKLGLGYRARYVSASARAILEEQGGLAWLQQLRESSYEEAHKALCILPGV
GE-DADK--FDG-SR-QPV-LAIKGARVS--DFGGR-SLSVLSSSTIIANPDIPEAYK-L
|   |||         | |            |       |         |         |
GTCVADKICLMALDKPQAVPVNVHMWHIAQRDYSWHPTTSQAKGPSPQTNKELGNFFRSL
----RGW-----FDAE-GQ
     ||     | |   |
WGPYAGWAQAVLFSADLRQ
1jmc 2xhi   64  238  315  26.89  20.32
--K---V----V-P------------I-AS------L----------------T------
             |              ||      |                |      
VHSFWDIAGPTARPVRLESLEDKRMAVDASIWIYQFLKAVRDQEGNAVKNSHITGFFRRI
---------P---Y-------------------Q-------S--------K---------
         |                       |       |        |         
CKLLYFGIRPVFVFDGGVPVLKRETIRQRKERRQGKRESAKSDEVTMDMIKEVQELLSRF
---W-T--I-----CA---R-------------V-----T----N----K---------S
     |        ||                 |     |    |    |         |
GIPYITAPMEAEAQCAELLQLNLVDGIITDDSDVFLFGGTKIYKNMFHEKNYVEFYDAES
--Q---I-R--------------T--------------------------W---------
        |              |                          |         
ILKLLGLDRKNMIELAQLLGSDYTNGLKGMGPVSSIEVIAEFGNLKNFKDWYNNGQFDKR
-----------------SN---------S--------R------------G---------
                  |         |        |            |         
KQETENKFEKDLRKKLVNNEIILDDDFPSVMVYDAYMRPEVDHDTTPFVWGVPDLDMLRS
----E-G----K-------L-----F--------------SLE---------------L-
      |    |       |     |              |||               | 
FMKTQLGWPHEKSDEILIPLIGVHSFWDIAGPTARPVRLESLEDKRMAVDASIWIYQFLK
-V-DE-----S---G------E-----IRAT-AFN--------E---Q---V--D--K--
 | |      |   |            ||    |         |   |   |  |  |  
AVRDQNAVKNSHITGFFRRICKLLYFGIRPVFVFDGGVPVLKRETIRQSDEVTMDMIKEV
------F---F---P---------LIEVN------------------KVY--------Y-
      |       |         |   |                  | |        | 
QELLSRFGIPYITAPMEAEAQCAELLQLNLVDGIITDDSDVFLFGGTKIYKNMFHEKNYV
-F----S--K--G-TLK--I--A--------N--K------------QFTAVKN--D-Y-
 |    |  |  |   |  |  |        |  |             |   ||  | | 
EFYDAESILKLLGLDRKNMIELAQLLGSDYTNGLKGMGPVSSIEVIAEFGNLKNFKDWYN
----E---M-T---F---------NNE-------TS--V----M-P-C--E---------
          |   |         |||        |  |    | |              
NGQFDKRKQETENKFEKDLRKKLVNNEIILDDDFPSVMVYDAYMRPEVDHDTTPFVWGVP
D-D-------------H----H-L-P-T-V-QF-DFTG-----I--DDLENK--SKD-S-
| |             |      | |   |  | |  |          || |    | | 
DLDMLRSFMKTQLGWPHEKSDEILIPLIGVHSFWDIAGPTARPVRLESLEDKRMAVDASI
-----L--V-D---I----I-G----ICK-SY---E-----D----A----T----K--I
     |  | |        | |    |||  |         |         |    |   
WIYQFLKAVRDQEAVKNSHITGFFRRICKLLYFGIRPVFVFDGGVPVLKRETIRQRKDEV
T------V-----R----------------S-----N----------------------N
|      |     |                      |                      |
TMDMIKEVQELLSRFGIPYITAPMEAEAQCAELLQLNLVDGIITDDSDVFLFGGTKIYKN
--RE---V----A----K-----R-N-I---YLM--D-TSG-K----V----VTA---TL
   |   |    |    |     | | |    |   | | | |    |    | |    |
MFHEKNYVEFYDAESILKLLGLDRKNMIELAQLLGSDYTNGLKGMGPVSSIEVIAEFGNL
-----W---GE-D---A------D---K---------F----------------D-----
     |   |  |          |   |         |                |     
KNFKDWYNNGQFDKQETENKFEKDLRKKLVNNEIILDFPSVMVYDAYMRPEVDHDTTPFV
-G--------S--R-Q---P--------V-L----A---IKG--AR-V---S--------
 |        |    |   |          |        | |  || |   |        
WGVPDLDMLRSFMKTQLGWPHEKSDEILIPLIGVHSFWDIAGPTARPVRLESLEDKRMAV
D----------------------------------------F-GG--------------R
|                                        | ||              |
DASIWIYQFLKAVRAVKNSHITGFFRRICKLLYFGIRPVFVFDGGVPVLKRETIRQRKER
---S----------LS------V---------------LS------S--S-------T-I
              ||                      |          |       | |
DEVTMDMIKEVQELLSRFGIPYITAPMEAEAQCAELLQLNLVDGIITDDSDVFLFGGTKI
----------I----A------------N---------PD----I----P----E--A-Y
               |            |          |         |    |  |  
YKNMFHEKNYVEFYDAESILKLLGLDRKNMIELAQLLGSDYTNGLKGMGPVSSIEVIAEF
---K-LRGW-----------------------------------F------DA----E--
   |    |                                   |      ||    |  
GNLKNFKDWYNNGQFDKRKQETENKFEKDLRKKLVNNEIILDDDFPSVMVYDAYMRPEVD
--------G-------------Q----------------
        |             |                
HDTTPFVWGVPDLDMLRSFMKTQLGWPHEKSDEILIPLI
1jmc 4q0z  164  238 1239  68.91  13.24
KVVPIASLTPYQSKWTICARVTNKSQIRTWSNSRGEGKLFSLELVDESGEIRATAFNEQV
      |   |  |      |   | |         |       |    |   |   |  
------S---YRDK-----KV--MS-I---------G------IV-K--EL--TGLSE--
DKFFPLIEVNKVYYFSKGTLKIANKQFTAVKNDYEMTFNNETSVMPCEDDHHLPTVQFDF
            ||      |                |       |   |    |     
-R-----QI-R-YY--E---K---R---SL-----L-F-------P---D-R--T---N-
TGIDDLENKSKDSLVDIIGICKSYEDATKITVRSNNREVAKRNIYLMDTSGKVVTATLWG
|||       |           |  |     |     |   |   |||            
TGI-----R-K--------Y--SFSD-----V-----E---R---LMD-----I------
EDADKFDGSRQPVLAIKGARVSDFGGRSLSVLSSSTIIANPDIPEAYKLRGWFDAEGQ
  |   |  |       |   |    |    |      |  |  || |       |  
--A---D--R--I-E-EGVQTSEI--RT-E-L------AKKD--EARKMK-----E--
1jmc 4r24   43  238   84  18.07  51.19
KVVPIASLTPYQSKWTICARVTNKSQIRTWSNSRGE-G-KLF-SL-ELVDESGEIRATAF
    |                 |   |       |    | |    |  ||  |      
-MDSIGE-SEVRALYKAILKFGNLKEILDELIADGTLPVKSFEKYGETYDEMMEAAKDCV
NEQVDKFFPLIEVNKVYYFSKGTLKIANKQFTAVKNDYEMTFNNETSVMPCEDDHHLPTV
 |   |    |   |       |   |       |        |               |
HEE-EKNRKEI-LEKL-E-KHATAYRAKLKSGEIKAENQPK-DNPLTRLSLK-KREKKAV
QFDFTGIDDLENKSKDSLVDIIGICKSYEDATKITVRSNNREVAKRNIYLMDTSGKVVTA
 | | |   | |    ||       | |    |    ||          |     | |  
LFNFKGVKSL-N-A-ESLLSRVEDLK-Y---LKNLINSNYKDDPLK-FSLGNNTPKPV-Q
TLWGEDADKFDGSRQPVLAIKGARVSDFGGRSLSVLSSSTIIANPDIPEAYKL--R-GW-
  |     |           |    |    |    |     |     | |  |  |    
N-WSSNWTKEEDEKLLIGVFKYGYGSWTQIRDDPFLGITDKIFLKKVPGAIHLGRRVDYL
FD-AEGQ
     | 
LSFLRG-
1jmc 3ted   46  238  228  19.33  20.18
KV-V---PIASL-TPY--QSKW--T---ICARV---T-NKS-Q-IRTWS-NS--R---G-
           |      |     |   |  |      |                   | 
ALTARQQEVFDLIRDHISQTGMPPTRAEIAQRLGFRSPNAAEEHLKALARKGVIEIVSGA
-EG-KLF-SLELVDE--SGE-IRATAFNE---QVD-KFF-PLIE-VNKVYYFS-K--GTL
  |  |   | ||     ||   |    |   |||   | |       |   | |  |  
SRGIRLLQGLPLVGRVAAGEPLLAQQHIEGHYQVDPSLFKPNADFLLRVSGMSMKDIGIM
--K-IA-NK-Q-F----TAV-KNDYEMT---F---NNETSVMPCEDDHHLP-TV---QFD
     |  | |        |   | | |        |     | |     |  |   |  
DGDLLAVHKTQDVRNGQVVVARIDDEVTVARLKKQGNKVELLP-ENSEFKPIVVDLRQQS
FT--G--IDDLEN-K---SK--D--SLV-D-I--IGICKS-YEDATKITVRS-N-NRE--
||  |       | |           |  | |   |      | |     || |   |  
FTIEGLAVGVIRNGKALTARQQEVFDLIRDHISQTGMPPTRAEIAQRLGFRSPNAAEEHL
--VAKRN-IYLMD-TS-G-KVV-TA-TLWGED-ADK-FDGSRQ--PVL----A---IK--
   |    |      | |         | |   |     |  |  | |    |       
KALARKGVIEIVSGASRGIRLLQEGLPLVGRVLAQQHIEGHYQVDPSLFKPNADFLLRVS
GARVSDFG---G-----------RS--LSV--LSSS-TI--I---ANP-D-IPE-A-YK-
|    | |   |           |     |       |        |     ||    | 
GMSMKDIGIMDGDLLAVHKTQDVRNGQVVVARIDDEVTVARLKKQGNKVELLPENSEFKP
----LRGW-F--D--A-----EGQ--
    ||   |     |      |   
IVVDLRQQSFTIEGLAVGVIRNGDWL
1jmc 3jsp   81  238  385  34.03  21.04
KVV--PIASLTPYQ-SKWTICARVTNKSQIRTWSNSRGEGKLFSLELVDESGEIRATAFN
          |      | |             |   |  |   |       |       
TMSRRNTDAITIHSILDW-IEDNLESPLSLEKVSERSGYSK-WHLQRMFKK-E-TGHSLG
EQVDKFFPLIEV-NKVYYFSKGTLKIANKQ-FTAVKNDYEMTFNNETSVMPCEDDHHLPT
          |   |        |  |    |         || |   | |         
QYI-RSRKMTEIAQKLKESNEPILYLAERYGFES-QQTLTRTFKNYFDV-P-PHKYRMTN
VQFDFTGIDDLENKSKDSLVDIIGICKSYEDATKITVRSNNREVAKRNIYLMDTSGKVVT
 |        | |    |  | |       |    |||| |   |   |      |  | 
MQGESRFLHPL-N-HYNSF-DPI-LLRPVDD-LELTVRSANCLKAEA-IHYI---GDLVQ
ATLWGEDADKFDGSRQPVLAIKG-ARVSD-FGGRSLSVLSSSTIIAN-PDIPEAYKLRGW
 |   |          | |  |      |    | || |       | |  | |      
RT---E-VE-L--LKTPNLGKKSLTEIKDVLASRGLS-L-GMR-LENWP--P-A-SI-A-
FDAEGQ
 | |  
-D-E--
1jmc 1xs9   50  238  209  21.01  23.92
KVVPIASLTPYQSKWTICARVTNKSQIRTWSNSRGEGKLFSLELVDES-GEIRATAFNEQ
    |  |   |              |  |    || ||   |||    |  |    |  
----I-QL--WQFLLELLTDKDARDCI-SWVGDEGEFKLNQPELVAQKWGQ-R--K-NKP
VDKFFPLIEVNKVYYFSKGTL-KIANKQFT-AVKNDYE-MT-FN-NETS--VMPCEDDH-
      |      ||       |   | |      |          |    |  ||    
TMNYEKLSRALR-YYYDGDMICKVQGKRFVYKFVCDLKTLIGYSAAELNRLVIECEQKKL
-HLPT-VQ-FD-F-TGIDD----L-EN--K-SKDSL-VDIIGICKSY-E-DATKITVRSN
               | ||    |  |      | |          |     |    |  
ARMDLGKKLLEAARAGQDDEVRILMANGAPFTTDWLGTSPLHLAAQYGHFSTTEVLLRAG
-NREV-AK--RN-IYLMDTSG--KVVTATL-WGEDADKFDGSRQPVL--AIK-G-ARVSD
  |    |  |         |    |   |  | |    |      |  |       |  
VSRDARTKVDRTPLHMAASEGHANIVEVLLKHGADVNAKDMLKMTALHWATEHNHQEVVE
FGGR-SLSVLSSSTIIANP-DIPEAYKLRGWFD-AE-GQ
        |   |       ||       |  | ||  |
LLIKYGADVHTQSKFCKTAFDI--SID-NGNEDLAEILQ
1jmc 1awc   57  238  263  23.95  21.67
KVVPIASLTPYQSKWTICARVTNKSQIRTWSNSRGEGKLFSLELVDESGEIRATAFNEQV
      |   |            |    ||         |   |         |      
------S--EYR-RY-Y---I--KG--GTW--------FFTVNLRNRRSQLLTTQY-QML
DKFFPLIEVNKVYYFSKGTLKIANKQFTAVKNDYEMTFNNETSVMPCEDDHHLPTVQFDF
      |   ||    |         |    |        |   | |     ||    ||
-R-H-AI-I-KV----K---R--DRPF-EI-NAW-VVL-PE-H-MHC--IWTLPEGDDDF
TGIDDLENKSKDSLVDIIGICKS-YEDA-TKITVRSNNREVAKRNI-YLMDTSGKVVTAT
      | | |       |  |            | |          |       |    
SS-RWREIK-K-QFTHACGL-KNIWQPRFWEHAIR-NTKDY-RHHVDYIY-IN-PVKHG-
LWGEDADKFDGSRQPVLAIKGARVSDFGGRSLSVLSSSTIIANPDIPEAYKLRGWFDAEG
 |     |   |  |       |  |   | |         |  |        |      
-W---V-K-QVSDWPFSTFH--R--DV-ARGLYPI--DW--AG-DVTD-FS-AG--ERII
Q
 
S
1jmc 4er8   41  238  164  17.23  25.00
--K-V----V-P---I-A-S-------LTPY----Q-------S---K-----------W
           |   |           ||||            |   |            
DYRQLHRWDLPPEEAIKVQNELRKKIKLTPYEGEPEYVAGVDLSFPGKEEGLAVIVVLEY
-T--I---CA-R--VT-----N----K-SQ--IRTW-S-NSR-------GEG-----KL-
    |      |   |                   |             | |     || 
PSFKILEVVSERGEITFPYIPGLLAFREGPLFLKAWEKLRTKPDVVVFDGQGLAHPRKLG
F-S---L--E---L-VDES---G-----E-IRAT-A--FN-EQ----V--DK-----FF-
  |   |  |     |  |   |     |  |         |     |   |      | 
IASHMGLFIEIPTIGVAKSRLYGTFKMPEDKRCSWSYLYDGEEIIGCVIRTKEGSAPIFV
-P--LIEV--NK--VYYFS-KG-TL-KIAN-KQ-FT-AV-KN--DY-EM-TFN-------
 |  |  |   |     |   |             |    |   ||              
SPGHLMDVESSKRLIKAFTLPGRRIPEPTRLAHIYTQRLKKGLMDYRQLHRWDLPPEEAI
---NE--TSV-M-PCE-DDHHLPTVQFDFTGIDD-------LE--N-K-----S-K-D-S
   ||        | |        |   | |          ||    |     |      
KVQNELRKKIKLTPYEGEPEYVAGVDLSFPGKEEGLAVIVVLEYPSFKILEVVSERGEIT
L--V-DII----G-I-CKSYED-ATK--ITV---R--SNNRE--VAKR-NIYL-MDTSGK
            |    |  |   ||    |         |    |          | | 
FPYIPGLLAFREGPLFLKAWEKLRTKPDVVVFDGQGLAHPRKLGIASHMGLFIEIPTIG-
VVTATLWG-----ED--AD-K--FDGSR--QPVLAIK-G-ARVSDFGGRSLSVLSSSTII
|    | |     ||         ||      |   | | |      |    | ||   |
VAKSRLYGTFKMPEDKRCSWSYLYDGEEIIGCVIRTKEGSAPIFVSPGHLMDVESSKRLI
-A-N-PD--IPEAYKLRG-WFD--AEGQ
 |   |   |||   |          | 
KAFTLPGRRIPEPTRLAHIYTQRLKKGL
1jmc 2w35   82  238  447  34.45  18.34
KVVPIASLTPYQSKWTICARVTNKSQIRTWSNSRGEGKLFSLELVDESGEIRATAFNEQV
|            |   |  |     | | |                      |      
K---------F-CK---CG-V--R--IQT-S-A------Y-------------TC-S---
DKFFPLIEVNKVYYFSKGTLKIANKQFTAVKNDYEMTFNNETSVMPCEDDHHLPTVQFDF
 |       |     | |     |       |     ||   |      |    |     
-K----CR-NR----S-G--E--N-------NSF---FNHKHS------D--I-T-K---
TGIDDLENKSKDSLVDIIGICKSYEDATKITVRSNNREVAKRNIYLMDTSGKVVTATLWG
  |   | | |       |  |      |    | |    |  |   |  | |       
SKI-S-E-KMK-------G--K------K-P--S-N--I-KK-I-SCD--G-VI----F-
EDADKFDGSRQPVLAIKGARVSDFGGRSLSVLSSSTIIANPDIPEAYKLRGWFDAEGQ
 |    |  |      |    |   |  | |          |     |   ||     
-DC-AADAARH----FK---IS--SG--L-V--TYR-VKS-D-----KW-NWFYI--N
1jmc 1i3j   45  238   96  18.91  46.88
-K-V-V-P----I---ASL--T----P-----YQ------S--K-WT---I-CARVTN-K
       |             |    |      |         |         |  ||  
QQPLELRPGEYRVLLCVDIGETRGHRPELLRELQRLHVTHTVRKLHVGDFVWVAQETNPR
---S--Q-----I--R-TWSN--SR---G---EGK--L--FSLE----LVDESGEI----
            |  |       |    |   | |  |    ||    || | |      
DPANPGELVLDHIVERKRLDDLCSSIIDGRFREQKFRLKRCGLERRVYLVEEHGSVHNLS
--RAT---AF-NEQV-DKFF---PL-I-E-----------VNKVY--Y-F-SK--GT---
    |   |  | || | ||      | |               |      |   ||   
LPESTLLQAVTNTQVIDGFFVKRTADIKESAAYLALLTRGLQRLYQGHTLRSRPWGTPGP
--L-K-I--------A--NK-Q-----F------T-AV---K--N--D-Y----E-M-TF
  |            |  || |     |         |   |     | |          
NPLCSLLTFSDFNAGAIKNKAQSVREVFARQLMQVRGVSGEKAAALVDRYSTPASLLAAY
N-------NET--SVMPC-EDDHHL-P----TV-Q-F-DF---T--G-IDDL--EN-KS-
         ||  |   |      | |    |  |        |                
DACATPKEQETLLSTIKCGRLQRNLGPALSRTLSQLYCSYGPLTNAALVTRMKAQRPEEC
-K------DS--L-VD----IIG-I----CKS-YE-DAT--KIT--VR---SNNRE--VA
 |      |   |         |      |    |  |     |   |   |  ||  | 
LKHIIVVLDPVLLQMEGGGQLLGALQTMECRCVIEAQAVPCSVTWRRRAGPSEDREDWVE
K-------R-NIYL-M-D---T-SGKV--VTA-T----L-W---G-E-------DADK-F
        |      | |   |  | |   || |    |       |       ||    
EPTVLVLLRAEAFVSMIDNGKTLQGFVTDITAKTAGKALSLVIVDQEKCFVSRVDAEEAL
-D---GSR-Q-P-V-----L-----AI-K--G-A-----R--------V-SDF--G----
 |       |   |     |     |  |    |     |          ||   |    
VDLQLHTEAQAQIVQSWKELADFTCAFTKAVAEAPFKKLRDETTFSFCLESDWAGGVKVD
--GRSLS-V-------L---S---SSTII-A--NPD-IPEAY------K-----L-----
  || |  |       |   |    |    |   |     ||      |     |     
LAGRGLALVWRRQIQQLNRVSLEMASAVVNAYPSPQLLVQAYQQCFSDKERQNLLADIQV
-----R-G-------WFDAEG-Q-----
     | |              |     
RRTSRRIGPELSRRIYLQMTTLQPHLSL
1jmc 4p0q  107  238  568  44.96  18.84
K-------V--VPIA-S-L--TP---Y---QSK-W-T-I-CARV-TNK----S-Q--I--
|           | |   |   |   |     |   |    |   |      | |  |  
KSHFQYSTLENIPKAFDILKDPPKKLYCVGDTKLLDTPLKVAIIGTRRPTPYSKQHTITL
-RTWS-N-----S--R-G------E-G--K---L--FSLELV-DESG-E-IRATAFN---
 |    |     |    |      |    |   |   ||           |   | |   
ARELAKNGAVIVSGGALGVDIIAQENALPKTIMLSPCSLDFIYPTNNHKVIQEIAQNGLI
-EQVDK-FFPL----IEVNK-VYYFS----------K-GTL---KIANK-Q---FT-AVK
     | | |        |  |   |          | |       | | |   |     
LSEYEKDFMPIKGSFLARNRLVIALSDVVIIPQADLKSGSMSSARLAQKYQKPLFVLPQR
-N--D--YE-M----T---FNNETSVMP-CED--DH--H--LPTV-Q-FD-FTG-IDDL-
 |  |   |          ||          |   |     |      ||        | 
LNESDGTNELLEKGQAQGIFNIQNFINTLLKDMKSHFQYSTLENIPKAFDILKDPPKKLY
---ENKSKDS-L-VDIIGICK-S-YEDATKITV-R--S-N-----N--R---E-VAKRN-
     |  |  | | |||      |     ||  |    |               |  | 
CVGDTKLLDTPLKVAIIGTRRPTPYSKQHTITLARELAKNGAVIVSGGALGVDIIAQENA
----IYL----MD----TSG-KVV--TA-T-L-WGE-DAD--KFDGS---R-QPVLAIKG
    | |     |    |   ||    |   |   |   |     ||   |   | |   
LPKTIMLSPCSLDFIYPTNNHKVIQEIAQNGLILSEYEKDFMPIKGSFLARNRLVIALSD
-ARV--SDF-GGRSLSV-LS---SS-T-II---AN-PD-IPEAY-K--LRGWFDAE---G
       |   |   |  |               |  |   |   |    | |       
VVIIPQADLKSGSMSSARLAQKYQKPLFVLPQRLNESDGTNELLEKGQAQGIFNIQNFIN
---Q-
     
TLLKD
1jmc 4ljr   87  238  425  36.55  20.47
-KVVPIAS-LT--PY-Q---SK-W--------TI----C----A----R--------VT-
   |   | |    | |      |         |    |                  |  
MRIVEVYSHLNGLEYIQVHLPHIWEEIQEIIVSIDAEACRTKESKEKTKQGQILYSPVAL
N---KSQI--RTWSNSR------GEGKL----FSL---E---LVDESG-E-IRA---TAF
|   |       |  ||         ||     ||   |        | |       | |
NEAFKEKLEAKGWKESRTNYYVTADPKLIRETLSLEPEEQKKVIEAAGKEALKSYNQTDF
-NEQV--D-KF--FPLI--E--V-NKVYYFS-K---GT--L--KIANKQFTAVKNDYE-M
    |     |           |     | | |   |   |  |   |        ||  
VKDRVAIEVQFGKYSFVAYDLFVKHMAFYVSDKIDVGVEILPMKELSKEMSSGISYYEGE
TFN--NE-TSV--MPCEDDHHLP--TVQ-FD-FTGIDDLE-NKSK--DSLVDII-GI---
  |       |   |       |   |       |                 ||  |   
LYNVIRQGRGVPAVPLVLIGIAPMRIVEVYSHLNGLEYIQVHLPHIWEEIQEIIVSIDAE
-CKSYE--DATK---I--T-VRSNN--RE-V-A---K--R-NIY------LM-DT-S---
 |   |    ||   |    |  |    |   |   |  | | |      |   | |   
ACRTKESKEKTKQGQILYSPVALNEAFKEKLEAKGWKESRTNYYVTADPKLIRETLSLEP
---GKVV-TA---TL--WGE-D-A-DK--FD---GSRQPV---LAIKG-A-RVSD-FG-G
    ||   |    |      |   |        |    |   |  |  |  |||    |
EEQKKVIEAAGKEALKSYNQTDFVKDRVAIEVQFGKYSFVAYDLFVKHMAFYVSDKIDVG
-RSLSV--LS-S-STIIANPDIPEAYK-LR-G-WFDA-E----G--Q
   |    ||   |  |      | |   | |    |      |   
VEILPMKELSKEMSSGISYYE-GELYNVIRQGRGVPAVPLVLIGIAP
1jmc 1vrr   86  238  406  36.13  21.18
KVVPIASLTPYQSKWTICARVTNKSQIRTWSNSRGEGKLFSLELVDESGEIRATAFNEQV
|     ||              |  |  |   |  | |      |     |    |  | 
KST-YFSLSD-EKRNRVYDACLNEFQ--T--HSFHEAKI--MHIV-KALDIPRGSF-YQY
DKFFPLIEVNKVYYFSKGTLKIANKQFTAVKNDYEMTFNNETSVMPCEDDHHLPTVQFDF
  |  |      |  |  || |    |   | |      |  |    |    |       
--FEDLKDA-YFYVLSQETLEIHDLFFNLLK-D------N--SI---EES--L-D-KYKY
TGIDDLENKSKDSLVDIIGICKSYEDATKITVRSNNREVAKRNIYLMDTSGKVVTATLWG
     |||   ||        | |      |     |   | |         ||      
L-L--LENLI-DS-PQ-YKLYK-YR-FLDWTYEL-ERD-WKDN-PISQVLKSVVHNLVY-
EDADKFDGSRQPVLAIKGARVSDFGGRSLSVLSSSTIIANPDIPEAYKLRGWFDAEGQ
     |  |       |                      |      |      |    
R-L--F--S-EN-WTEK-TFIENY-DKEIKLVTEG-LL-N------Y-IT---DRK-N
1jmc 3vok   46  238  175  19.33  26.29
-K------------V-VP--I--------A-S--------L---TP--Y-Q-S-KW-TIC
 |              ||  |        | |        |   |   |     |  |  
KKNLDASITSIIHEIGVPAHIKGYLYLREAISMVYNDIELLGSITKVLYPDIAKKFNTTA
ARVTN--KSQIR-TWS--NSRGEGKLF-----S--LELV-DESG-E--IRA--TA-FNE-
 ||       |   ||  |      ||     |     | |    |    |  |    | 
SRVERAIRHAIEVAWSRGNIDSISSLFAKPTNSEFIAMVADKLRLEHNLDASITSIIHEI
QV--D-K-FFPLIE-VNKVYY-FS-KGTL-KI--AN--KQF--TA--VKN--DY--EMTF
 |    |    | |    ||      |   |       | |  ||  |        |   
GVPAHIKGYLYLREAISMVYNDIELLGSITKVLYPDIAKKFNTTASRVERAIRHAIEVAW
N--N-E--TSVM--P--CE-----DDH-HLPTVQFDFTG-IDDL---EN-KS----KD--
   |     |    |   |      |   |       |  |         |         
SRGNIDSISSLFAKPTNSEFIAMVADKLRLKNLDASITSIIHEIGVPAHIKGYLYLREAI
SLV--DI--IG-ICK-SYED-ATKI--T---V-RS-NNR-EVA-KR-NI--Y--LMD-TS
| |  ||   | | |  | | | |   |   | |      |||  | ||     |   | 
SMVYNDIELLGSITKVLYPDIAKKFNTTASRVERAIRHAIEVAWSRGNIDSISSLFGYTK
GK------V-VTA-TLWGE-DADKFDGS--R--QPV-L-A-IKG---AR--VS----D--
 |          |  |  |  |   | |           | |||    |   |    |  
AKPTNSEFIAMVADKLRLEHKAKNLDASITSIIHEIGVPAHIKGYLYLREAISMVYNDIE
-FGG--RSL--SV---L--SSS----TI---I--A----NPD-IPEAYKLR---GWF-D-
  |     |            |     |   |  |    | | |    |       |   
LLGSITKVLYPDIAKKFNTTASRVERAIRHAIEVAWSRGNIDSISSLFKAKPTNSEFIAM
-AE--G-Q-
 |       
VADKLRLEH
1jmc 1lq1   97  238  429  40.76  22.61
KVVPIASLTPYQSKWTICARV-TNKSQIRTWSNSRGEGKLFSLELVDESGEIRATAFNEQ
     || |   |   |  |  |  | |        |      |         |      
----MAS-T--KSE-LI-ERLATQQSHI-P-AKT-VEDAV-K-EMLEHMASTLAQGGSGG
VDKFFPLIEVNKVYYFSKGTLKIANKQFTAVKNDYEMTFNNETSVMPCEDDHHLPTVQFD
  |     |    | | |  |    |   | |   |  |  |      |           
LTK----AEMSE-YLFDK--LGL-SKR-DA-KELVELFF-EEIR-RALENGEQV-KLS-G
FTGIDDLENKS-KDSLVDIIGICKSYE-DATK-ITVRSNNREVAKRNIYLMDTSGKVVTA
| |  ||  |          |        |    | |       |         |     
F-GNFDLRDKNQRPGRNPKTG--EDIPITARRVVTFRP-GQKL-KSRVENAG-GGERIEI
TLWGEDADKFDGSRQPVLAIKGARVSDFGGRSLSVLSSSTIIANPDIPEAYKLRGWFDAE
   |         |       |  |    |               |    |   |     
RGFGSFSLHYRAPRTGRNPKTGDKV-ELEGKYVPHFKPGKEL-R-DRANIYGGSG-HHHH
GQ
  
HH
1jmc 2iie   44  238  204  18.49  21.57
KVVPIASLTPYQSKWTICARVTNKSQIRTWSNSRGEGKLFSLELVDESGEIRATAFNEQV
         |   |     |     |  |    | | |  |        |       |  
----M-G--P---K-----R---R-QL-TF---R-E-K--S-RII-Q--EV------EE-
DKFFPLIEVNKVYYFSKGTLKIANKQFTAVKNDYEMTFNNETSVMPCEDDHHLPTVQFDF
    |           ||   ||              | |     |       |      
N---P--DL-R-----KG--EIA-R-----R------F-N---I-P-------PST-LS-
TGIDDLENKSKDSLVDIIGICKSYEDATKITVRSNNREVAKRNIYLMDTSGKVVTATLWG
| |  | ||              |  |   | |  |         |    |    |  | 
T-I--LKNK-R-A-I-LASE-RKYGVAS--TCRKTNK-LSPYD-KL-E--GLLI-A--WF
EDADKFDGSRQPVLAIKGARVSDFGGRSLSVLSSSTIIANPDIPEAYKLRGWFD--AEGQ
       |   ||   ||          |            |   |    || |      
QQI-RAAG--LPV---KGIILKE---KALRI-AEE--LGMDDF-TA-S-NGWLDRFRRRR
-
 
S
1jmc 1hlv   45  238  131  18.91  34.35
-KV---VP-I-A-S-----L-T---PYQ-------S--------K-WT----I-C----A
 ||   |  | | |     | |    ||                | |            |
PKVRELVAHIVALSQHPAALGTVAVTYQHIITALATHEDIVGVGKQWSGARALEALLTDA
---R-----V-T----N--K-----S-Q-I---R--------T--W-----S-N------
   |       |       |             |        |        | |      
GELRGPPLQLDTGQLVKIAKRGGVTAMEAVHASRNALTPLNLTPAQVVAIASNNGGKQAL
-S--R---------G------------E-GK--LFSLE--L-V---------DE-----S
    |         |              ||  |      | |         |      |
ETVQRLLPVLCQAHGLTPAQVVAIASHDGGKQALETMQRLLPVLCQAHGLPPDQVVAIAS
---G----E-I-R-------A---T-----AF--N---EQ----VDKFFP-L-----I--
   |    |   |       |   |     |        |    |    | |        
NIGGKQALETVQRLLPVLCQAHGLTPDQVVAIASHGGGKQALETVQRLLPVLCQAHGLTP
-E-V-----N--K-----V---Y-YF--SKG-T----LKIA-N---KQ-F-TA-----V-
   |        |     |           | |      || |   ||   |      | 
DQVVAIASHDGGKQALETVQRLLPVLCQAHGLTPDQVVAIASNGGGKQALETVQRLLPVL
-K-N----DYEMTF-NN------ET-S-VMP--CE------D------DH----------
        |       |      ||     |  |       |       |          
CQAHGLTPDQVVAIASNGGKQALETVQRLLPVLCQAHGLTPDQVVAIASHDGGKQALETV
----------H-L-P--TV---QFD-----F-T------------GI--DD---L-EN--
          | | |   |     |       |            |   |       |  
QRLLPVLCQTHGLTPAQVVAIASHDGGKQALETVQQLLPVLCQAHGLTPDQVVAIASNIG
-K----S--K------DS--LV-D--I-I-----G------------I-CKSY---ED--
 |                  |  |    |     |              |       |  
GKQALATVQRLLPVLCQAHGLTPDQVVAIASNGGGKQALETVQRLLPVLCQAHGLTPDQV
---AT----K--I-TV-R-------SN--NR-E-V--A-----KR---NI--YL--M-D-
   |     |    || |                |  |     |         |      
VAIASNGGGKQALETVQRLLPVLCQAHGLTQVQVVAIASNIGGKQALETVQRLLPVLCQA
---T--------S---GK-----V-----V-------T---------------A--T---
   |        |   ||     |     |       |               |  |   
HGLTPAQVVAIASHDGGKQALETVQRLLPVLCQAHGLTPDQVVAIASNGGGKQALETVQR
LW-G---ED----A--D--K------------------F--D----------G-----S-
|  |   |     |     |                     |          |       
LLPGLTQEQVVAIASNNGGKQALETVQRLLPVLCQAHGLTPDQVVAIASNGGGKQALETV
-R------Q-----P---V-LA--I--K-----------------G---AR-V---SDFG
 |      |     |   |  |  |  |                 |   |  |   |  |
QRLLPVLCQAHGLTPAQVVAIASNIGGKQALETVQRLLPVLCQDHGLTLAQVVAIASNIG
GR-SL-S------VLSSS-T----I-IA-N--------------P----D--I-P-E---
|   |        ||    |      || |              |    |    |     
GKQALETVQRLLPVLCQGLTQDQVVAIASNIGGKQALETVQRLLPVLCQDHGLTPDQVVA
-A--Y--K--L----R---------G-WFD------------A-E-------------G-
 |     |  |    |         |   |            | |             | 
IASNIGGKQALETVQRLLPVLCQDHGLTLDQVVAIASNGGKQALETVQRLLPVLCQDHGL
---Q---------
   |         
TPDQVVAIASNSG
1jmc 3ugm  133  238  853  55.88  15.59
-KVVPIASLTPYQSKWTICARVTNKSQIRTWSNSRGEGKLFSLELVDESGEIRATAFNEQ
  |     |     |     ||   |      |  |  ||  |        | ||   | 
YHVEKFSGLR-IR-K----PRVSS-SEMERKMN--GR-KLIRLAQL-QN-KI-AT---EK
VDKFFPLIEVNKVYYFSKGTLKIANKQFTAVKNDYEMTFNNETSVMPCED-DHHLPTVQF
        |   |  |  |   |  |  |        ||          | |       |
LEE-----E-DWV-TF--G-V-IV-KKITPQSSNNGKTF-SIWRLNDLKDLDKYI-SL-F
DFTGID-DLENKSKDSLVDIIGICKSYEDATKITVRSNNREVAKRNIYLMDTSGKVVTAT
 | | |   |    |     ||         |        ||        |   ||    
LF-G-DVHKEHWKTDQ-GTVIGLLNA--NPMK-P-KEGTDEVCL-SV---DNPQKVL---
LWGEDADKFDGSRQPVLAIKGARVSDFGGRSLSVLSSSTIIANPDIPEAYKLRGWFDAEG
| | ||    |        | ||    |              | |  | |          
LMG-DAVDL-GT-----C-K-ARKKN-GDPCTQMV--N--L-N-DC-E-Y-CQ--YHV--
Q
 
-
1jmc 3h15   53  238  172  22.27  30.81
-K-V-V-----PIASL-TP-Y----------QS----KWTI-CARV-T-----N---K--
   | |     |      | |           |    ||      | |     |   |  
DTIVAVELDTYPNTDIGDPSYPHIGIDIKSVRSKKTAKWNMQNGKVGTAHIIYNSVGKRL
SQ-I---R----T--W----SN---S--R-G---E-G--K-----L---F-S-L-E---L
|           |        |      | |     |  |     |   | | | |   |
SAVVSYPNGDSATVSYDVDLDNVLPEWVRVGLSASTGLYKETNTILSWSFTSKLKETNAL
--V-DE-S-G--E-I-R--A-TAF--N-E--QV-DKFFPL-IEVNK-VYY--FS--KGTL
  |    |      |    | |    | |   |     |    |     |          
HFVFNQFSKDQKDLILQGDATTGTDGNLELTRVSSNGSPQGSSVGRALFYAPVHIWESSA
KIA--NKQFT-AVK-ND-Y--E-MT-F-NN-ETSVMPC-EDDH--HL-P-----T---VQ
  |     ||   |  |         |  |   |  |         | |     |   | 
VVASFDATFTFLIKSSDSHPADGIAFFISNIDSSI-PSGSTGRLLGLFPDANADTIVAVE
FD-F--T--G------ID-DLEN-KSKDSLV-DI----IGICK-SYEDATK-IT-VRS--
 |    |  |      |  |     ||            |     |    |    | |  
LDTYPNTDIGDPSYPHIGIDIKSVRSKKTAKWNMQNGKVGTAHIIYNSVGKRLSAVVSYP
N--NREVA---K-RNI---Y--L-MDTS-GKV-VTAT-L-W---G---E-DA-D-KFDG-
|     |       |            | |    | | | |       |  |    |   
NGDSATVSYDVDLDNVLPEWVRVGLSASTGLYKETNTILSWSFTSKLKETNALHFVFNQF
SR-Q-P-VL---A---IKG----ARV-SD-F--G---GRSL--S-V-L--SS----S---
|  |    |   |     |     || |     |   || |    |    ||    |   
SKDQKDLILQGDATTGTDGNLELTRVSSNGSPQGSSVGRALFYAPVHIWESSAVVASFDA
--T--I----------IA----NPD--IPE-AY-KLRGWFDAEGQ
  |  |          ||    | |  ||      | | |     
TFTFLIKSSDSHPADGIAFFISNIDSSIPSGSTGRLLGLF-PDAN
1jmc 4tzd  100  238  463  42.02  21.60
-K-V-VPIASL---T-------------PYQSKWT-ICARVTNKSQIRT-WSNSRGEGKL
      |   |   |             || || |  |  ||   |           |  
TNYIYTPLNQLKGGTIVNVYGVVKFFKPPYLSKGTDYCSVVTIVDQTNVKLTCLLFSGNY
FSLELVDESGEI-RATAFNEQV-DKFFPLIEVNKVYYFS-KGTL--K-I---ANKQFTAV
  |      | | |      ||  |    |           |||    |     | |   
EALPIIYKNGDIVRFHRLKIQVYKKETQGITSSGFASLTFEGTLGAPIIPRTSSKYFNFT
KNDYEM--TFNNETSV-M-PCEDDHHLPTVQ-FDFTGID-DLENKSK-D--S-LVDI-IG
  |  |        |  | |      |  ||          |  |   |  | |     |
TEDHKMVEALRVWASTHMSP-STLLKLCDVQPMQYFDLTCQLLGKAEVDGASFLLKVWDG
I-C--KSYEDATK-ITVRSNNREVAK-RN--IYLMDTSGKV-VTATL-WGEDADKFD-GS
      |                     |  |        | |   |  |          
TRTPFPSWRVLIQDLVLEGDLSHIHRLQNLTIDILVYDNHVHVARSLKVGSFLRIYSLHT
R-QPVLAIKGARVS-DF---GGRSLSVLSSSTI-IANPDIPEAYK-LRGWFDAEGQ
  |          |  |   || |            | |     | |         
KLQSMNSENQTMLSLEFHLHGGTSYG-RGIRVLPESNSDVDQLKKDLES-ANLTA-
1jmc 3kjp   58  238  292  24.37  19.86
KV-V---PIAS-LTPYQS-K-----WT-IC-AR-----VTNKSQI--RTWS---NS--RG
   |    | | |    |           |        | |      |  |   ||    
CILVGGHEITSGLEVISSLRAIHGLQVEVCPLNGCDYIVSNRMVVERRSQSEMLNSVNKN
---EG-K-LFSL-E----LV--D-------ES------GE-IR-A-TAFNEQ-VD--KFF
   |    | |  |     |  |        |      |  ||       |   |  |  
KFIEQIQHLQSMFERICVIVEKDRRRTKSYDSLLTTLIGAGIRILFSSCQEETADLLKEL
PLIE----V--N--K---V-YYFSKGTLK-I-A-N--KQFTAVK---N----D---Y-EM
 | |    |     |      | |      | | |   ||  ||   |        |   
SLVEQRKNVGIHVPKSEALQFYLSIPNISYITALNMCHQFSSVKRMANSSLQEISMYAQV
TF-N-NET-S-VMPCED-DH--HLP---TVQFD-FTG--I-DDLENKSK----DSLV-DI
|     |         |     | |    |      |         | |    | |  | 
THQKAEEIYRYIHYVFDIQMLVHVPLGHIVANEKWRGSQLAEEMQGKIKLIFEDGLTPDF
-I-G-ICKSY--E-D--A-T---K--ITVR-SNN-R--EVA-K-R-N-IY---LMD-T--
      |  |  | |  |     |    || |||     |  | |    |   |   |  
YLSNRCCILYVTEADLVAGNGYRKRLVRVRNSNNLKGIVVVEKTRMSEQYFPALQKFTVL
S-GKV---V-T---AT-LWGE-DADKF-DGSRQPVLAIK-G-AR-VSDF-G-GR-SLS-V
  | |   |     |  |            |  | |       | |    | |       
DLGMVLLPVASQMEASCLVIQLVQEQTKEPSKNPLLLSEPSLLRTVQQIPGVGKVKAPLL
LSS-STI--IANPDIPEAYKLRGWFDA-E--G---Q-
|     |    |  | |     |   |        | 
LQKFPSIQQLSNASIGELEQVVGQAVAQQIHAFFTQP
1jmc 4bxo   89  238  397  37.39  22.42
---KVV--P----I----------A-SL----------T-P------Y------Q-S---
        |               | |           | |      |        |   
GYVEIIEQPKQRGMRFRYKCEGRSAGSIPGERSTDTTKTHPTIKINGYTGPGTVRISLVT
K--------W-TI---C------A-----R-V-T--N-------K-------SQ-IRTWS
|               |      |     |      |       |       || | |  
KDPPHRPHPHELVGKDCRDGFYEAELCPDRCIHSFQNLGIQCVKKRDLEQAISQRIQTNN
N--------SRG--E--G-KL-F-------S---LEL--V------D-------E-----
|         ||        | |       |   | |  |      |       |     
NPFQVPIEEQRGDYDLNAVRLCFQVTVRDPSGRPLRLPPVLSHPIFDNRAPNTAELKICR
------S---G-EI--------R----A--T-----A---FN--E---QVD-KF----F-
      |   | ||                |     |   |       ||   |      
VNRNSGSCLGGDEIFLLCDKVQKEDIEVYFTGPGWEARGSFSQADVHRQVAIVFRTPPYA
-P-L-----I----------EVNK-V-Y-Y---------F---------S---KG-----
 | |                |        |         |         |    |     
DPSLQAPVRVSMQLRRPSDRELSEPMEFQYLPDAAPRVLFGEWLLGEISSGCYEGLQWLD
---T---L--K-IANK---Q-----F-T-AV---K----N------D-YE----MT-FN-
   |      |  | |         |   ||                  |     | |  
EARTCFRVPWKHFARKDLSEADARIFKAWAVARGRWPPSSRPPPEAETAERAGWKTNFRC
--NET-S-VM--P-CED--D-H--H----------LP-TV------Q-------------
    |   ||      |  | |             ||  |      |             
ALRSTRRFVMLRDNSGDPADQHKVYALSGSLSSDSLPWLVSQLDLGQLEGVAWVNKSRTR
F---------------D---F------TG--I---D--DL---E-N-KS----K------
|               |   |      ||      |  ||     |  |    |      
FRIPWKHGLRQDAQQEDFGIFQAWAEATGAYVPGRDKPDLPTWKRNFRSALNRKEGLRLA
-D-S--------L---V--D-----II------G-----IC-----------------KS
 | |            |  |     |       |      |                 ||
EDRSKDPHDPHKIYEFVNMDGPYLQILEQPKQRGFRFRYVCEGPSHGGLPGASSEKNKKS
Y-E----D----A-------T--------------K-----I-TV----R------SN--
|           |       |              |     | ||            |  
YPQVKICNYVGPAKVIVQLVTNGKNIHLHAHSLVGKHCEDGICTVTAGPKDMVVGFANLG
--N----R--E-V-AK------R--N----I-----YLM-----DTS-G---K-VV-TAT
          |   |       |  |          ||      |   |   |     | 
ILHVTKKKVFETLEARMTEACIRGYNPGLLVHPDLAYLQAEGGGDRQLGDREKELIRQAA
L--WGE-DAD--K-----F--D--GS---R-QPVL--AI---K--GA---R-V-SD----
|    | |          |  |  ||   |  ||   ||   |   |     |  |    
LQQTKEMDLSVVRLMFTAFLPDSTGSFTRRLEPVVSDAIYDSKAPNASNLKIVRMDRTAG
-F-GGRS---L--SV------L-------S--------S-S-T-I-----IA--NP---D
   ||     |   |                         | |       |    |   |
CVTGGEEIYLLCDKVQKDDIQIRFYEEEENGGVWEGFGDFSPTDVHRQFAIVFKTPKYKD
--I--P-EAY-KLRGWFD---AE-------GQ
  |  |      ||   |    |         
INITKPASVFVQLRRKSDLETSEPKPFLYYPE
1jmc 2o61  134  238  812  56.30  16.50
KVVPIASLTPYQSKWTICARVTNKSQIRTWSNSRGEGKL-FSLELVDESGEIRATAFNEQ
   |  ||            |      |  | | |     | ||    |    |  |  |
D--P-NSL--MTNRLVLSGTVC-RAPLRKVSPS-GIPHCQFVLE--HRSVQEEA-GFHRQ
VDKFFP-LI--EVNK-V-YYFSKGTLKIANKQF-TA--VKNDY-EMTFNNETSVMPCED-
     |       |         |   |    |      ||    |    |         
AWCQMPVIVSGHENQAITHSITVGS-RITVQGFISCHKAKNGLSKMVLHAE-QIELIDSV
DHHLPTVQFDFTGIDDLENKSKDSLVDIIG-ICKSYEDATKITVRS-NNREVAKRNIYLM
|               |       ||   |  |       |                   
DKLAAALEHHHHHPNSLMT-NR--LV-LSGTVCRA--PLRKVSPSGIPHCQFVLEHRSVQ
DTSGKVVTATLWGEDADKFDG-SRQPVL-AIK-GARVS-D-F-G-GRSLSVLSSSTIIAN
   |       |        |   |     |  | |     |         ||     | 
EEAG--FHRQAWCQMPVIVSGHENQAITHSITVGSRITVQGFISCHKAKNGLSKMVLHAE
P-DIPEAY-KLRGWFDAEGQ
         ||         
QIELIDSVDKLAAALEHHHH
1jmc 2ccz   44  238  240  18.49  18.33
-K-V-------V-P--I----A----SL-T-PY--QSKW--TIC--A---R---VTNKS-
           | |       |       | |     |   | |  |   |   | |   
ANFIAEFFGHRVYPEVVSTEAARNDQATGTCPFLTAAKLVETSCVKAETSRGVCVVNTAV
-QIR-TW---SN-----------SR---GEG--K-L-F-SL-ELVDES---G--E-I-R-
   |  |    |           ||   | |    | |     | |     |  |   | 
DNERYDWLVCPNRALDPLFMSAASRKLFGYGPTEPLQFIAAPTLADQAVRDGIREWLDRG
--ATA-FNE----Q--V---D---KF-F--PLIEVNKVY-------Y---------F--S
    | | |           |    | |   | ||   |       |         |  |
VHVVAYFQEKLGGELSISKTDSSPEFSFDWTLAEVESIYPVPKIKRYGVLEIQTMDFHGS
-K---GTLKIA--NK-QF-----T-----AV--K----N--D------YEMT--F--N-N
 |   |   ||      |     |     |   |    |         | |   |     
YKHAVGAIDIALVEGIDFHGWLPTPAGRAALSKKMEGPNLSNVFKRTFYQMAYKFALSGH
E----TS-VMP--C-ED-DHHL--PT-V-QFD--FT-G----------I-------D-D-
     |    |         ||  ||     |  |  |          |       | | 
QRCAGTGFAIPQSVWKSWLRHLANPTLIDNGDGTFSLGDTRNDSENAWIFVFELDPDTDA
--------LE---N-----K-S-KDS----L-----V----D-I-------------I--
        ||   |           |    |     |    |               |  
SPRPLAPHLEIRVNVDTLIDLALRESPRAALGPSGPVATFTDKVEARMLRFWPKANFIAE
--G--IC-K--SYE----D-A-------T--K-I-T--VR---S------N----N-R-E
  |        | |    | |       |  |   |  |    |      |    | |  
FFGHRVYPEVVSTEAARNDQATGTCPFLTAAKLVETSCVKAETSRGVCVVNTAVDNERYD
--V-------------AKRNI--Y-----L-------M-D--T-SG------K-V-VTA-
  |             | |    |     |         |     |        | | | 
WLVCPNRALDPLFMSAASRKLFGYGPTEPLQFIAAPTLADQAVRDGIREWLDRGVHVVAY
---TLWGE------D-A-D-KFD---G---S-RQ-P------VLAI---------K---G
    | ||      |      ||       |    |      || |         |   |
FQEKLGGELSISKTDSSPEFSFDWTLAEVESIYPVPKIKRYGVLEIQTMDFHGSYKHAVG
A---R-V-S-DF-G------GR---S-------LS-V-------------LS-----SST
|     |   || |      ||   |       || |             ||       |
AIDIALVEGIDFHGWLPTPAGRAALSKKMEGPNLSNVFKRTFYQMAYKFALSGHQRCAGT
---I---I--------ANP-----------------D-----I------P--E------A
   |            |||                 |     |      |         |
GFAIPQSVWKSWLRHLANPTLIDNGDGTFSLGDTRNDSENAWIFVFELDPDTDASPRPLA
-Y---K----------L----R------G---WF-D-AEG---Q---
                |    |      |    | |  |        
PHLEIRVNVDTLIDLALRESPRAALGPSGPVATFTDKVEARMLRFWP
1jmc 3c25  135  238  707  56.72  19.09
--K-VVPIA--SLTP-YQSKWT--IC-AR---V-T----NKSQI-R-T--W------SNS
        |       | |     |       | |    |||   |           || 
QSRGEKRTAHNAIEKRYRSSINDKIIELKDLVVGTEAKLNKSAVLRKAIDYIRFLQHSNQ
RGEGKLFSLE-LVDESGEI--RA---TAFNEQVDKFFPLIEVN-KVYYFSK---GT-LKI
       ||   |  |     |    || |    |       | |         ||  | 
KLKQENLSLRTAVHKSKSLKSRGEKRTAHN-AIEKRY-RSSINDKIIELKDLVVGTEAKL
ANKQFTAVKN-DYEMTFNNETSVMPCEDDHHLPT-V---QF--D-FTGIDDLE-N-K-S-
 ||     |  ||   |              | | |   |      |     |     | 
-NKSAVLRKAIDY-IRFLQHSNQKLKQENLSLRTAVHKSQSRGEKRTAHNAIEKRYRSSI
KDSLV---D-IIGI-CKSYEDAT--K-IT-VR--S-NNREVAKRNIYLMDTSGKVVT-AT
 |      |   |   |    |   | |   |     |      |  |     |      
NDKIIELKDLVVGTEAKLNKSAVLRKAIDYIRFLQHSNQKLKQENLSLRTAVHKSKSLKD
LW--GE-----DA-DK-FDGS-RQPVLAIKGARV-SDFG-GRSLSVL-SS-STI--I--A
|   ||      |  |    |        |   |        |  ||      |      
LQSRGEKRTAHNAIEKRYRSSINDKIIELKDLVVGTEAKLNKS-AVLRKAIDYIRFLQHS
NPDI-PEAYKLRGWFDAEGQ
|     |   ||        
NQKLKQENLSLR--TAVHKS
1jmc 1am9   67  238  313  28.15  21.41
-K----V-V--P-IAS-LTPY-Q-SK-WT-IC--A-RV-T-NKSQ----I--RT---WS-
 |    |      |   |  |   ||  | |   |    |    |        |      
KKTRGRVKIKMEFIDNKLRRYTTFSKRKTGIMKKAYELSTLTGTQVLLLVASETGHVYTF
NSR-------GE-GK-LF-S-LELVD-ES-G------E-I----RA-TAFN---------
  |        | || |    |   |    |      | |    |  | |          
ATRKLQPMITSETGKALIQTCLNSPDKKTRGRVKIKMEFIDNKLRRYTTFSKRKTGIMKK
--E-------Q----V--D--K-F-F------PLI--EVNK--VY-YF-S---K--G-T-
  |       |    |         |      | |  |  |        |   |  |   
AYELSTLTGTQVLLLVASETGHVYTFATRKLQPMITSETGKALIQTCLNSPDKKTRGRVK
LK---IANK--Q---F----TAV-KNDYEM-TF-NNETSVM-PCEDDH-H------L-P-
 |   | ||      |    |   |  ||  |            |  |        | | 
IKMEFIDNKLRRYTTFSKRKTGIMKKAYELSTLTGTQVLLLVASETGHVYTFATRKLQPM
----T----VQ--F---D----FT-G---ID-D-LENK-------SK-DS-LV----DI-
    |     |      |     | |   |      ||       ||             
ITSETGKALIQTCLNSPDKPGKKTRGRVKIKMEFIDNKLRRYTTFSKRKTGIMKKAYELS
-I-G------IC-KS---YEDAT-K----I---T----VRS--N----N-----R---E-
   |              |  || |    |   |         |                
TLTGTQVLLLVASETGHVYTFATRKLQPMITSETGKALIQTCLNSPDDSAITLWQFLLQL
VAK-RNIYLMD-TS--G--KVV----TATLWG--ED-AD-KFDG-SR--Q--PVL-AI-K
  |  |      ||  |  |       | |||          |  ||      |   | |
LQKPQNKHMICWTSNDGQFKLLQAEEVARLWGIRKNKPNMNYDKLSRALRYYYVKNIIKK
--G---A-R-V--------S--DF---G---G---RSL-S-V---------L----S---
  |       |        |  |    |        || |           |        
VNGQKFVYKFVSYPEILNMSRNDYIHSGLYSSFTLNSLNSAITLWQFLLQLLQKPQNKHM
---SST------I----IA-------N-P----D-IPEA----Y-K--L-R--G----W-
    |             |       | |    |    |    | |       |      
ICWTSNDGQFKLLQAEEVARLWGIRKNKPNMNYDKLSRALRYYYVKNIIKKVNGQKFVYK
F------------D-A-EG--------Q
|            |    |         
FVSYPEILNMSRNDYIHSGLYSSFTLNS
1jmc 1hbx  106  238  568  44.54  18.66
---KVVP-IASLT--PYQSKWTIC-ARVTNKSQIRTWSNSRGEGKLFSLELVD-ESGEIR
           ||  |     |   | | |       |  |      | |  | |    |
AGDTTITVVGNLTADP-ELRFTPSGAAVANFT-V-A-STPRMFDRQ-SGEWKDGEALFLR
ATAFNEQVDKFF-PLIEVNKVYYFSKGTLKIANKQFTAVKNDYEMTFNNETSVMPCEDDH
     |        |     |     | ||     ||      |      | |   | | 
CNIWREAAENVAESLTRGSRV-IVT-GRLK--QRSFT--R-EGE----KRT-VVEVEVDE
HLPTVQFDFTGIDDLENK-SKDSLVDIIG-ICKSYE-DATKITVRSNNREVAKR-NI-YL
  |      |      ||   |      |      |   |       |  ||        
IGPSLRY-ATA--KV-NKMAGDTTITVVGNLTADPELRFTPSGAAVANFTVASTPRMGEW
MDTSGKVVTATLWGEDADKF-DG-SRQPVLAIKGARVSDFGGRSLSVLSSSTIIANPDIP
 |          | | |        |       | |      ||       |        
KDGEALFLRCNIWREAAENVAESLTRGSRVIVTG-RLKQ---RSFETREKRTVV-EVEVD
E-AYKLRGWFDAE-GQ
|    ||    |    
EIGPSLR-YATAKVNK
1jmc 3a5u   52  238  229  21.85  22.71
K-V--V----P-----I----A-S-L-TP-YQ-SKW-----T-I-CA-RVT--NKSQ-IR
  |       |     |    | |   |             |   ||   |     |  |
NDVDLIKRLGPSAMDQIMLYLAFSAMRTSGHRHGAFLDAAATAAKCAIYMTYLEQGQNLR
-T-----W------S--NS-R-G--EGKLFS-L---E---LVD------ES-----GEIR
 |                  |    ||||   |   |   |        |      |  |
MTGHLHHLEPKRVKAIVEEVRQALTEGKLLKMLGSQEPRYLIQFPYVWMEKYPWRPGRSR
--ATAF-N-E--QVD-K-------------F-F-PLIE-VNK-----V---Y-Y-FS---
   |     |  |   |             | |  |||   |              |   
IPGTSLTSEEKRQIEQKLPSNLPDAHLITSFEFLELIEFLHKRSQEDLPKEHQMPLSEAL
----K------GTL-KI-A--NKQF---T----AVKND----Y---EMT---F----N--
    |      ||   |       |   |    |   |    |   | |   |       
AEHIKRRLLYSGTVTRIDSPWGMPFYALTRPFYAPADDQERTYIMVEDTARFFRMMRDWA
----N------ETSVMP-----C--E-D-------D-HH----LPTV-QFDF---TGID-
    |      |    |        | |       |  |     | | |  |      | 
EKRPNTMRVLEELDILPEKMQQAKDELDEIIRAWADKYHQDDGVPVVLQMVFGKKESNDV
DLENKSKDSLVD-I---IGI-C-K-S-Y-E----D--AT--K--I--T-------VR-S-
||      |  | |           |        |  ||  |  |  |        |   
DLIKRLGPSAMDQIMLYLAFSAMRTSGHRHGAFLDAAATAAKCAIYMTYLEQGQNLRMTG
--NN----R------EV--A-------K-------RN-I---YL-MD----TSG--KVV-
        |      ||  |       |       |  |   |  |       |      
HLHHLEPKRVKAIVEEVRQALTEGKLLKMLGSQEPRYLIQFPYVWMEKYPWRPGRSRIPG
TA-T----------L-WG-EDA---------D--KF-------D--GSRQ-PV---LA--
|  |          |     ||             |       |     | |    ||  
TSLTSEEKRQIEQKLPSNLPDAHLITSFEFLELIEFLHKRSQEDLPKEHQMPLSEALAEH
IK------G--ARV-SDFG----G--R---S-L-----S-VLSSST-----II---A--N
||      |   |  |  |       |                  |          |   
IKRRLLYSGTVTRIDSPWGMPFYALTRPFYAPADDQERTYIMVEDTARFFRMMRDWAEKR
P---------DI-PE----AY-KL----RGW---F---D----A-E---G--Q
|         || ||    |   |    | |       |          |   
PNTMRVLEELDILPEKMQQAKDELDEIIRAWADKYHQDDGVPVVLQMVFGKKE
1jmc 4j00  113  238  593  47.48  19.06
-KV---V-PI-A--SLTPYQSKWTIC-----AR-----V--T-N-------KSQ---I--
 |       |     ||  |    ||      |     |            | |   |  
EKLGSEIKKIRVLRGLTQKQLSENICHQSEVSRIESGAVYPSMDILQGIAAKLQIPIIHF
-RT--WSN-SR-----G-------E-G-K-LFS-L--EL-VDE-SGE----I--R--ATA
      |   |                 |        ||   |   |            |
YEVLIYSDIERKKQFKDQVIMLCKQKRYKEIYNKVWNELKKEEYHPEFQQFLQWQYYVAA
F-----N-EQ-V-D--KFF--PL--IEV--N---K-----VY----YFSKG------TLK
        |       |     |  | |  |          |    |  ||       ||
YVLKKVDYEYCILELKKLLNQQLTGIDVYQNLYIENAIANIYAENGYLKKGIDLFEQILK
-I-A---NKQF-TAVK-N-------D--YEMT-F--NN--ETS--V--M-----------
   |   |  |   |  |       |  ||      |   | |     |           
QLEALHDNEEFDVKVRYNHAKALYLDSRYEESLYQVNKAIEISCRINSMALIGQLYYQRG
PC-----------ED---------D----H-H---LPT-VQ-F--D---F-T--GI-D-D
 |           ||         |    |     |                  |     
ECLRKLEYEEAEIEDAYKKASFFFDILEMHAYKEALVNKAEKLGSEIKKIRVLRGLTQKQ
L-EN-----K-SK-DS-LV----DII-GI-CK-S------YE-----D----AT-K---I
| ||       |   |  |    ||  ||  |        ||     |       |   |
LSENICHQSEVSRIESGAVYPSMDILQGIAAKLQIPIIHFYEVLIYSDIERKKQFKDQVI
TV----R--S--N---N---R-----E----------V-A---KR-NI-Y-------LMD
      |     |   |         |          | |   |     |       |  
MLCKQKRYKEIYNKVWNELKKEEYHPEFQQFLQWQYYVAAYVLKKVDYEYCILELKKLLN
--TSG-KV-----V--T-ATL-----W---G----E------DA--D--KFD--------
    |  |          |           |    |       |  |   ||        
QQLTGIDVYQNLYIENAIANIYAENGYLKKGIDLFEQILKQLEALHDNEEFDVKVRYNHA
-G----SR--Q---PV-LAIK-GARV-S-D-FG------GRSLSVL--SSSTI---I--A
      ||       |  ||    |  |    |      |  |  |      |      |
KALYLDSRYEESLYQVNKAIEISCRINSMALIGQLYYQRGECLRKLEYEEAEIEDAYKKA
N--PDIPE--AYK--L--RG-W-FD-AE-G-Q-
    || |  |||  |       |  |      
SFFFDILEMHAYKEALVNKADLPFEFADLPFEF
1jmc 3u3w  107  238  573  44.96  18.67
-KV-VP-I---A----S---L--TPY-QSKWTICARV---TNKS-QI-RTWSNSRG-EG-
  |    |   |    |   |    |   |  ||      | |   |  |  |  |    
MEVEKEFITDEAKELLSKDKLIQQAYNEVKTSICSPIWPATSKTFTINNTEKNCNGVVPI
K-L-FS-L--------E--L-V-D-E---SGEIRA-TAF--N-E--QVD-KF-F-PL--I
| |    |        |  |     |    | |     |  | |   |   |        
KELCYTLLEDTYNWYREKPLDILKLEKKKGGPIDVYKEFIENSELKRVGMEFETGNISSA
--EVNKVYYFSK-GTLKIA----N-KQ---F-T-AVKN----D-Y-EMT------F-N-N
    ||     | |    |      ||     |  | |      | | |      |   |
HRSMNKLLLGLKHGEIDLAIILMPIKQLAYYLTDRVTNFEELEPYFELTEGQPFIFIGFN
-E--TS-V-M-P-CEDDHHLPTV-QF-DFTGID-D-L--ENK---SKDSLV-----DI-I
 |   | |   |   |           |           | |   ||| |          
AEAYNSNVPLIPKGSDGMSKRSIKKWKDKMEVEKEFITDEAKELLSKDKLIQQAYNEVKT
GICKSYEDAT-K-ITV-RS--N-NREV-AKRNIY-LM-DT-S---GKVV-TATL----WG
 ||     || |  |      | |  |  |   | |  ||      |      |     |
SICSPIWPATSKTFTINNTEKNCNGVVPIKELCYTLLEDTYNWYREKPLDILKLEKKKGG
E-DADK-F-DGSR-QPV-LAIK-G----A-R-VSD--FG---GR-SLS-VL---SS-S--
  |  | |   |    |      |    | |       |   |   |   |         
PIDVYKEFIENSELKRVGMEFETGNISSAHRSMNKLLLGLKHGEIDLAIILMPIKQLAYY
-T-IIAN-----P--DI----P--------EAY--------K----L--RG---WFDAEG
 |    |     |        |        |||        |       |    | |   
LTDRVTNFEELEPYFELTEGQPFIFIGFNAEAYNSNVPLIPKGSDGMSKRSIKKWKDKVE
Q
 
N
1jmc 1esg   95  238  421  39.92  22.57
--KVVPIASLTPY-QSKWTICAR-VT--N---KSQIR---T-W-SNSRG----E-GKLFS
       | |         | |  |       | | |   |   |           |   
FHDQLKFAWLAGFVDADGCINAQIVSREDYLLKYQVRVSLTVFQSTTQHFILLDIQKILG
LELV-DES-G--E---IRATAFNEQVDKFFP-L-IE-VN-K-V-YYFSK-GTLKIANKQF
   |     |  |      |       |  | |       | |     |    |      
CGTVRKRNDGMSEFCVVGGTSLQTTLEKLLPYLNLKRAQAKLVLQIIKKLPNTKDPSVLM
-TAVKND-YE-MTFNNE-T----SVMPC-ED-DH--HL-PTVQFDF-TG-ID-D-LEN-K
  |   |     |     |     |  |     |         |    |  | |   |  
EAALLADKVGLLTDGKKRTILAENVRECLKKLGHVVNFHDQLKFAWLAGFVDADGCINAQ
--SK-DSLV--DI-IG--ICKS----Y--EDATKI----TVRS-NN--RE---V---A-K
  |  | |             |        |  ||    |||  |    |   |      
IVSREDYLLKYQVRVSLTVFQSTTQHFILLDIQKILGCGTVRKRNDGMSEFCVVGGTSLQ
RNI-YLMD-TSGKVVTATLWGEDADKFDGSRQPVLAIKGARVSDFGGRSLSVLSSSTIIA
     |      |   | |      |      |      |   |  |  |      || |
TTLEKLLPYLNLKRAQAKLVLQIIKKLPNTKDPSVLMEAALLADKVG-LLTDGKKRTILA
NPDIPEAYKLRGWFDAEGQ
     |  |  |       
E-NVRECLKKLG--HVV-S
1jmc 5a72   63  238  314  26.47  20.06
KVVPIASLTPYQSKWTICARVTNKSQIRTWSNSRGEGKLFSLELVDESGEIRATAFNEQV
    |  | |    |    |    | |     |    |  ||   ||             
----I--L-P-ED-WHL--RFPSGSEIIQYAASH-YVK-NSLD-PDE--QL-LDRRRVEY
DKFFPLI-EVNKVYYFSKGTLKIANKQFTAVKNDYEMTFNNET-SVMPCEDDH-HLP-TV
|  | |  |        ||        | |  |                   |       
D-IFLLVEELHVLDIIRKGFGSV-D-EFIALANSVSNRRKSRAGKSLELHLEHLFIEHGL
Q-FDFTGIDDLENKSKDSLVDIIGICKSYEDATKITVRSNNREVAKRNIYLMDTSGKVVT
  |    |    ||  | |    |    | | |   |  | |  |       |       
RHFATQAITE-GNKKPDFLFPSAG---AYHD-TEFPV-ENLRMLAVKTT-CKDRWRQILN
ATLWGEDADKFDGSRQPV-LAIKGARVSDFGGRSLSVLSSSTIIANPDIPEAYKLR-GWF
          |      | ||         | | | |  ||     |    |     | |
EADKIHQVHLFT-LQEGVSLA-QYREMRESGVR-L-VVPSSLHKKYPEAVRAELMTLGAF
DAE--G---Q--
 ||  |      
IAELTGLYADIP
1jmc 3hqg   55  238  221  23.11  24.89
---K--VV--PIA--SLT---P--YQSKWT-I-C-ARVTNKSQ-I-R-T-WSNS---RGE
   |      |     |          |       | |          | | |      |
CEMKRTTLDSPLGKLELSGCEQGLHEIKLLGVPAPAAVLGGPEPLMQCTAWLNAYFHQPE
G--K-----L----F---S-----L-E-L-VDESGE-I---R-AT-AFN-E--Q-V-D--
         |    |   |     |   | |   || |     |  | |      |    
AIEEFPVPALHHPVFQQESFTRQVLWKLLKVVKFGEVISYQQLAALAGNPKAARAVGGAM
K-F-FP-LI---E-V-NK--V--Y--------Y-FS-KG-TL-KIAN-KQFT--A-V-K-
     | ||     |     |  |              |  | |    |  |      | 
RGNPVPILIPCHRVVCSSGAVGNYSGGLAVKEWLLAHEGHRLGKPCEMKRTTLDSPLGKL
--N--D---YEM-TFN--NETSVM----P---C-E--DDH-H----L-----PTV-Q--F
          |           |     |   |        |          |      |
ELSGCEQGLHEIKLLGVPAPAAVLGGPEPLMQCTAWLNAYFHQPEAIEEFPVPALHHPVF
--D-FT-------------G--I--DD---LE-N-K-SK---DSL----VDI-I---G-I
    ||             |  |       |  | |             | | |      
QQESFTRQVLWKLLKVVKFGEVISYQQLAALAGNPKAARAVGGAMRGNPVPILIPCHRVV
CKS-----YE-D-ATK--ITVRSNNR-EVAKRNI-Y-L--MDTS----G----K------
| |     |    | |         | |         |     |    |    |      
CSSGAVGNYSGGLAVKEWLLAHEGHRCEMKRTTLDSPLGKLELSGCEQGLHEIKLLGGPE
-VVTATLW--G---E-DA-DKFD-GS-RQPVL---A----I--KGARVSDFG---G-RSL
     | |         |   |       ||            |   |  ||       |
PLMQCTAWLNAYFHQPEAIEEFPVPALHHPVFQQESFTRQVLWKLLKVVKFGEVISYQQL
SVLS-S--ST-II--A---NP-D--IP-------E-AYKL--RGWFDA-EG-Q--
  |            |   ||    ||         |  |    |  | ||    
AALAGNPKAARAVGGAMRGNPVPILIPCHRVVCSSGAVGLAVKEWLLAHEGHRLG
1jmc 1yfh   86  238  475  36.13  18.11
--KV--V----PIAS-L-TPYQ--S-K-W---T-----I-CA-R-----V-----TN-KS
   |  |     |   | |             |        | |                
MANVLIVEDEQAIRRFLRTALEGDGMRVFEAETLQRGLLEAATRKPDLIILDLGLPDGDG
-Q-I---RTWS-------NSRG-EG-KLFSLEL-VDE--S-----GEIRA---TAFNEQV
   |   | ||         |  |  |   |    |   |     ||  |    |     
IEFIRDLRQWSAVPVIVLSARSEESDKIAALDAGADDYLSKPFGIGELQARLRVALRRHA
-D---KFFPL-IEV-NKVYYFSKGTLKIANKQF--TAV-KNDY-E-MT----FN-----N
 |   ||          |              |   ||  |      |     |     |
PDPLVKFSDVTVDLAARVIHRGEEEVHLTPIEFRLLAVLLNNAGKVLTQRQLLNQVWGPN
--ETS----V-M-----PCEDD----HH-L-PT-V--QF-----------D------F--
  | |      |       | |     |    |     |           |      |  
AVEHSHYLRIYMGHLRQKLEQDPARPRHFITETGIGYRFMLAMANVLIVEDEQAIRRFLR
T-----G--I-D-D-LE-N--K--S-K-DSLV-DI-I----GI--CKSY-E-DATKITV-
|     |        |          | |    |       ||          |    | 
TALEGDGMRVFEAETLQRGLLEAATRKPDLIILDLGLPDGDGIEFIRDLRQWSAVPVIVL
--RSNNRE-V-A-KRNI--YLMDT-S-GKV---VTATL--W-GEDA-D---KF-DGSRQ-
  ||       |       ||      |         |       | |   || |     
SARSEESDKIAALDAGADDYLSKPFGIGELQARLRVALRRHSATTAPDPLVKFSDVTVDL
PVLAI-KG-ARV--SDFGGRSLSV-LSSS-TIIA-----N----PD-IPEA-Y-KL-RG-
    |  |   |       | | | |             |    |       |     | 
AARVIHRGEEEVHLTPIEFRLLAVLLNNAGKVLTQRQLLNQVWGPNAVEHSHYLRIYMGH
--W-F--D-A-------E---G-Q---
       | |       |   |     
LRQKLEQDPARPRHFITETGIGYRFML
1jmc 4kny   80  238  447  33.61  17.90
KVVPIASLTPYQSKWTICARVTNKSQIRTWSNSRGEGKLFSLELVDESGEIRATAFNEQV
  | |    |   |    |        |       ||   |       |    ||  || 
PYVEITE-QPH-PK----A-L--R--FR-Y-EC--EGR--SAGSI--PG-VNTTA--EQ-
DKFFPLIEVNKVYYFSKGTLKIANKQFTAVKNDYEMTFNNETSVMPCEDDHHLPTVQFDF
 | || | |   |              |           |      |       ||    
-KTFPSIQVHG-YR-GRAVV-VVS-CVTKEGPEHKPHPHNLVGKEGCKKG--VCTVEINS
TGIDDLENKSKDSLVDIIGICKSYEDATKITVRSNNREVAKRNIYLMDTSGKVVTATLWG
|            |   |  |    |      |    |   |     |      |    |
T---TM-SYTFNNL-G-IQ-CVKKKDVEE-ALRL-RQEI--R-V---DPF-R--TG--FG
EDADKFDGSRQPVLAIKGARVSDFGGRSLSVLSSSTIIANPDIPEAYKLRGWFDAEGQ
  | |  ||          |   |    |           |  |         |    
H-A-KEPGS---I-DLNAVRLC-F-QVFLEGQQRGR-FTEPLTPVVSDI--IYD-K-K
1jmc 1bvo   46  238  175  19.33  26.29
KVVPIASLTPYQ-SK-W--TI-CA-RV-TNKSQIRTWSNSR-G-EG-KL---F-SL-E-L
       ||  |  |       ||     |   | |  | |      ||     |     
FDIGV-NLTSSQFAKDRDDVVACAFDAGVNGLLI-TGTNLRESQQAQKLARQYSSCWSTA
-V--DESGEIRATAFNEQ-VD-KFFP-LIEVNKV-YYFSKGTLKIANKQFTAVKNDYEMT
 |    |    | |  |        |           |          |  |        
GVHPHDSSQWQA-ATEEAIIELAAQPEVVAIGECGLDFNR-NFSTPEEQERAFVAQLRIA
FN-NETSVMPCEDDH-HLPTVQFDFTGIDDLENKSKDSL--V-DIIGICKSYEDATKIT-
   |    | | | |    |        | |                 |        || 
ADLNMPVFMHCRDAHERFMTL-LE-PWLDKLPGAVLHCFTGTREEMQACVAHGIYIGITG
-VRSNNREVAKRNIY-LMDTSGKVV-T-AT-LWGED-ADKFDGSR-QPV-LA-IKGARVS
 |    |    |    |         | |  |   |   |    |  |  |  |   |  
WVCDERRGLELRELLPLIPAEKLLIETDAPYLLPRDLTPKPSSRRNEPAHLPHIL-QRIA
DFGGRSLSVLSSSTIIANPDIPEAYKLRGWFDAEGQ
   |     |   |  ||        | |   |   
HWRGEDAAWLAATT-DAN--V-KT--LFG-I-A--F
1jmc 4pe8   56  238  259  23.53  21.62
KVV-----PI-ASL-TPYQSK-WTI-CARVTNKSQIR-TW-SN--SR-GEGKLFSLELVD
           | |     |       |       |         ||     | |     
RLTSKGRYAVTAMLDVALNSEAGPVPLADISERQGISLSYLEQLFSRLRKNGLVSSVRGP
ESGE-IRATAFNEQVDKFFPLIEVNKVYYFSKGTLKIANKQFTAVKNDYEM-TF-NNETS
  |      |    |           |               |   |        ||   
GGGYLLGKDASSIAVGEVISAVD-ESVDALTHALWRDLSDRLTGFLNNITLGELVNNQ-E
VMPCED-DH--HLPTV-QFDFTGIDDLENKSKDSLVDIIGICKSYEDATKITVRSNNREV
|       |   |        |   |    |    |    |                |  
VLDVSGRQHTMRLTSKGRYAVTAMLDVALNSEAGPVPLADISERQGISLSYLEQLFSR-L
AKRNIYLMDTSGKVVTATLWGEDADKFD-GS-RQPVLAI-K-GARVSDFG-GRSL-SVLS
 |         |      | | ||     |     | |  | ||   |      |   ||
RKNGL-VSSVRGP-GGGYLLGKDASSIAVGEVISAVDAQGKGGAQGGDKALTHALWRDLS
SS-TIIANPDIPEAYKLRGWFDAEGQ
   |   |  |     |      |  
DRLTGFLN-NITLG-ELVN--NQEVL
1jmc 4hf1   47  238  257  19.75  18.29
----------K--------------------V-----V-------------P-------I
          |                    |     |             |       |
AWAASAEVANKPRLVFVGDELRYAQGANQRDVELDGFVNYHWLTSPGGLGLPKVMLEAGI
---A-------S---L-------------T-P-------------Y----Q-S-------
   |       |   |             | |             |      |       
NAPAEVVGPDRSRRALIAIRSSPWKAGHETNPWHDEFDLDHGHVRYFGDHKPSTVGLPGE
-K----------------------------W---T------------I--C--A---R--
 |                                |               |  |   |  
TKGNRLLLEAARLHAGTTREERLLAPPLFLFRAVTVHRAGRAVVKGHVEFCGAAIIERLE
--V-----T-------------------------------N-------------------
  |     |                               |                   
HVVQRDPETGRSFPNLSLDLAVVSGGEIDGVDFRWIDDRRNAALAAGETLRHAPESWIRW
-----------------------K-------S------Q---------------------
                       |       |      |                     
VRQGRLAIPGIRRRVLASAVQSSKEQQPASGSAEAATLQTLYKFYDGRKHAFELLASRVA
---------------------------I-R-----------------------T------
                           | |                       |      
AEVFRESGARYKEGWLSRSSGDGGVDFIGRIDMGSLKASTPVVVLGQAKCIQPTSSVSPE
------------W----------S--------------------------------N---
            |          |                                |   
QVARVVARLRRGWIGVYVTTGSFSRQAQVEIIDDQYPVVLIAGGTLAATVRRMVQANYGG
-------------------------------S-------R----G-E-----G---K---
                               |       |    | |     |       
DLDALLASTVDEYGAAVTHRRPEEVISLWAASAEVANKPRLVFVGDELRYAQGANQRDVE
L--F-------S----------L--------E----------L--V--------------
|  |       |          |        |          |                 
LDGFVNYHWLTSPGGLGLPKVMLEAGINAPAEVVGPDRSRRALIAIRSSPWKAGHETNPW
-DE----------------S-----GE-------I---R--A--T------A-----F--
 ||                |     ||           |  |  |      |     |  
HDEFDLDHGHVRYFGDHKPSTVGLPGETKGNRLLLEAARLHAGTTREERLLAPPLFLFRA
-------------N---------E--Q--V--D----KFFP-----L--I---E---V--
                       |     |  |      ||     |      |   |  
VTVHRAGRAVVKGHVEFCGAAIIERLEHVVQRDPETGRSFPNLSLDLAVVSGGEIDGVDF
-------N------------------------------------------K---------
       |                                          |         
RWIDDRRNAALAAGETLRHAPESWIRWVRQGRLAIPGIRRRVLASAVQSSKEQQPASGSA
-------VY--Y------------------F--S----K---------------------
        |  |                  |  |    |                     
EAATLQTLYKFYDGRKHAFELLASRVAAEVFRESGARYKEGWLSRSSGDGGVDFIGRIDM
G-----T----L---K-I---------------A----------------NK--------
|     |    |   | |               |                          
GSLKASTPVVVLGQAKCIQPTSSVSPEQVARVVARLRRGWIGVYVTTGSFSRQAQVEIID
-QF--------T--A-V-K----N-------------D-Y----------E---M-----
 |         |  | |      |             | |          |         
DQYPVVLIAGGTLAATVRRMVQANYGGDLDALLASTVDEYGAAVTHRRPEEVISLIAWAA
T----------F-----------N----------N-E--TS--------VM---------
           |           |          |    ||        ||         
SAEVANKPRLVFVGDELRYAQGANQRDVELDGFVNYHWLTSPGGLGLPKVMLEAGINAPA
------------------P--C---------E---D--------DH--------------
                  |            |   |        ||              
EVVGPDRSRRALIAIRSSPWKAGHETNPWHDEFDLDHGHVRYFGDHKPSTVGLPGETKGN
---------H---------L--P-------T------------VQF--------------
         |         |  |       |            | |              
RLLLEAARLHAGTTREERLLAPPLFLFRAVTVHRAGRAVVKGHVEFCGAAIIERLEHVVQ
-D------F----------T-----G-----IDD-----------L----E---------
 |      |                |     |||           |    |         
RDPETGRSFPNLSLDLAVVSGGEIDGVDFRWIDDRRNAALAAGETLRHAPESWIRWVRQG
------------------NK-------S----------K--D------------------
                   |       |          |  |                  
RLAIPGIRRRVLASAVQSSKEQQPASGSAEAATLQTLYKFYDGRKHAFELLASRVAAEVF
--S--------L--------VD-I--I--G---------I-----C-K-----S------
  |        |        || |  |  |               |       |      
RESGARYKEGWLSRSSGDGGVDFIGRIDMGSLKASTPVVVLGQAKCIQPTSSVSPEQVAR
------------Y------------E---D-------A--T-KITV-R---SN-------
            |            |   |       |  |   || |    |       
VVARLRRGWIGVYVTTGSFSRQAQVEIIDDQYPVVLIAGGTLAATVRRMVQANYGGDLDA
--------------N-R--------------EVA-K-R-----N-I-Y--------L-MD
                |              ||| | |         |           |
LLASTVDEYGAAVTHRRPEEVISLIAWAASAEVANKPRLVFVGDELRYAQGANQRDVELD
--------TS----G--KV-----V-T-A-------T---L-------W--G--------
        ||    |  ||         |           |       |  |        
GFVNYHWLTSPGGLGLPKVMLEAGINAPAEVVGPDRSRRALIAIRSSPWKAGHETNPWHD
E-DAD----K-F-D--------------------------G-SR-Q-----P------V-
| | |      | |                          |  |       |      | 
EFDLDHGHVRYFGDHKPSTVGLPGETKGNRLLLEAARLHAGTTREERLLAPPLFLFRAVT
L-----A-IK------G-A----------------R-----------VS-------DF--
      |  |      | |                |           ||       ||  
VHRAGRAVVKGHVEFCGAAIIERLEHVVQRDPETGRSFPNLSLDLAVVSGGEIDGVDFRW
----------------------------G-----G---R-----------------S---
                            |     |   |                 |   
IDDRRNAALAAGETLRHAPESWIRWVRQGRLAIPGIRRRVLASAVQSSKEQQPASGSAEA
-------------------L-S-----V------------L---S--------------S
                   | |     |            |   |              |
ATLQTLYKFYDGRKHAFELLASRVAAEVFRESGARYKEGWLSRSSGDGGVDFIGRIDMGS
---ST--II---A---NP--DI-PE--A--Y-KL-RGW---------F------------
   ||       |    |     ||  |     | |||         |            
LKASTPVVVLGQAKCIQPTSSVSPEQVARVVARLRRGWIGVYVTTGSFSRQAQVEIIDDQ
---------------------------D---A----E-G---------Q----
                           |   |    | |              
YPVVLIAGGTLAATVRRMVQANYGGDLDALLASTVDEYGAAVTHRRPEEVISL
1jmc 4r28  188  238 1793  78.99  10.49
KVVPIASLTPYQSKWTICARVTNKSQIRTWSNSRGEGKLFSLELVDESGEIRATAFNEQV
    |       |     |    |   |   |   | |       |    |    |    
N-DDI-EV---ES--D--A---DK---RAHHNAL-ERK--R-R--D---HIK-DSFHSLR
DKFFPLIEVNKVYYFSKGTLKIANKQFTAVKNDYEMTFNNETSVMPCEDDHHLPTVQFDF
|   |     |    |     |  |   |    |          |      |  | | | 
DS-VPSLQGEKA---SR-A-QILDK---A--TEY-IQY------M--RRKNH--THQQD-
TGIDDLENKSKDSLVDIIGICKSYEDATKITVRSNNREVAKRNIY-LMDTSGKVVTATLW
  ||||     |   |          |     |   |   |     | | |   |   | 
--IDDLKRQNSDA--D--K--RAHHNA--LE-R-KRRDHIKDSFHSLRD-S---V-PSLQ
GEDADKFDGSRQPVLAIKGARVSDFGGRSLSVLSSSTIIANPDIPEAYKLRGWFDAEGQ
||   |   ||   |  | |                |     ||    | |        
GE---K--ASRAQILD-K-A--TEY-IQYMR-RKNHT--HQQDIDD-LK-R-----Q-N
1jmc 1hlo   52  238  153  21.85  33.99
-----KVV-------P----IA---S-------L---T----------------------
      |        |     |   |       |   |                      
ILLDTNVISEPLRPQPNERVVAWLDSLILEDVYLSAITVAEMRLGVALLLNGKKKNVLHE
-------------------P----Y-Q--S------K-------W---T-----I-CA-R
                   |    | |  |      |           |        | |
RMEQSILPLFAGRILPFDEPVAAIYAQIRSYAKTHGKEIAAADGYIAATAKQHSMTVATR
-----------V----------------TNK-SQ-I------R--TW--S----N---S-
           |                ||  |         |   |  |        | 
DTGSFFAADVAVFNPWHLEHHHHMILLDTNVISEPLRPQPNERVVAWLDSLILEDVYLSA
------R-G-----EG--K--L---F--S-LEL----V---DE---S--GEIR--A-T--
      | |      |  |  |      | | |        ||        ||  | |  
ITVAEMRLGVALLLNGKKKNVLHERMEQSILPLFAGRILPFDEPVAAIYAQIRSYAKTHG
-----A--F---N-EQ----V---D--K-F------F-P--------L----I-E-V---
     |         |    |   |    |      | |        |    | |     
KEIAAADGYIAATAKQHSMTVATRDTGSFFAADVAVFNPWHLEHMILLDTNVISEPLRPQ
-N-K-V-Y---------YFS-------K-G-T--L----K-IAN-K--Q-----------
 |   |           | |         |    |    |        |           
PNERVVAWLDSLILEDVYLSAITVAEMRLGVALLLNGKKKNVLHERMEQSILPLFAGRIL
-F-----T--A-V----K-N-------D-Y------E--MTF-NNET-S-----V-M--P
 |        |      |         | |         ||     | |     |    |
PFDEPVAAIYAQIRSYAKTHGKEIAAADGYIAATAKQHSMTVATRDTGSFFAADVAVFNP
--CEDDHH---LPT-V-------Q-FD-FTG-ID-----D--L------E---------N
   |  ||   | | |       |         |     |  |      |         |
WHLEHHHHMILLDTNVISEPLRPQPNERVVAWLDSLILEDVYLSAITVAEMRLGVALLLN
-KSK-------D-S---L----V---D--I--I-G-I---CKSY--E----D----AT-K
 | |         |   |        |     |   |    |    |    |    || |
GKKKNVLHERMEQSILPLFAGRILPFDEPVAAIYAQIRSYAKTHGKEIAAADGYIAATAK
---ITV--R---S---------N-------N---R---E-----V---AK---RN----I
    ||  |   |         |           |   |         |    |     |
QHSMTVATRDTGSFFAADVAVFNPWHLEHASVVIRNLSEATHNAIKFRARAAGRSTEAEI
YL-MD-------T--------S--------------GK--VV----T-AT---L-W----
 |  |       |        |              |   ||      ||          
RLILDNIAKAQQTVRLGSMLASIGQEIGGVELEDVRGRASVVIRNLSEATHNAIKFRARA
-G-E-DAD-K--FDG-SR--QPV-----LA-I--K--G-----A----R-VSD-------
 |    |      |      | |     || |     |     |    |  |        
AGRSTEAEIRLILDNIAKAQQTVRLGSMLASIGQEIGGVELEDASVVIRNLSEATHNAIK
F----GGRS--------L--------SV-LSS--STI---I--AN-PD-------I---P
|     |||        |         | | |    |   |      |       |    
FRARAAGRSTEAEIRLILDNIAKAQQTVRLGSMLASIGQEIGGVELEDVRGASVVIRNLS
EA-Y---KL--R--G--------W-FD---------------A----E--G---Q
||     |   |  |           |               |    |  |    
EATHNAIKFRARAAGRSTEAEIRLILDNIAKAQQTVRLGSMLASIGQEIGGVELE
1jmc 2bsq  142  238  835  59.66  17.01
KVVPIASLTPYQSKWTICARVTNKSQIRTWSNSRGEGKLFSLELVDESGEIRATAFNEQV
      | |    |   | |   |  |        |    |        |          
------SRT--ACK-R-C-RL--K-KIK--CD-Q-E--FPSCKRCAKL-EVPCVSLDPAT
DKFFPLIEVNKVYYFSKGTLKIANKQFTAVKNDYEMTFNNETSVMPCEDDHHLPTVQFDF
 |  |      |  |       |       |  |       |           |      
GKDVP--R-SYV-FFLE-D-RLA-VMMRVLK-EYGV---DPTKI---R-G-NIP-A----
TGIDDLENKSKDSLVDIIGICKSYEDATKITVRSNNREVAKRNIYLMDTSGKVVTATLWG
|  || |    | |      ||      ||          ||   |       |   |  
TS-DD-E-PF-D-LKSRTA-CKRCR-LKKIKC-DQEFPSCKRCAKL-EV--PCV--SL-D
EDADKFDGSRQPVLAIKGARVSDFGGRSLSVLSSSTIIANPDIPEAYKLRGWFDAEGQ
    | |  |  |         |   | | |             | |   |  |    
PATGK-DVPRSYVF-F----LED---R-LAVM--MRVL-K----E-Y---G-VD-P-T
1jmc 1pyi   46  238  158  19.33  29.11
------K---V--V---P---I-------A--SL-T-PY-------Q--SK--W-TICA-
      |      |   |   |       |  || |             ||  |  |   
NEKSLNKIMLIGRVGCEPDIKILNGGDKVATFSLATNEFWRDRNTNELKSKTDWHRIVVY
-R--V--TN----KS-----Q--IRT--W--SN-SR-GE-------GKL-F------SL-
    |        |      |    |  |  |      |       | | |      || 
DQNIVDLIDKYLRKGRRVYVQGSLHTRKWHTSQPKQITEIILSYNKGDLIFLDMNEKSLN
E--L---V----D-E--S-GE-I---R-AT-AF-----NE---QVD--KF--F-P-LIE-
   |   |    |      |        ||  |     ||     |              
KIMLIGRVGCEPDIKILNGGDKVATFSLATNEFWRDRTNELKSKTDWHRIVVYDQNIVDL
VNK-V----YYFSKGTL---K-IAN---KQFT-AV-K-NDYEMTF-N-NETS---VM---
  |           | |   |   |   || |      |     |   || |    |   
IDKYLRKGRRVYVQGSLHTRKWHTNDQPKQITEIILSYNKGDLIFLDMNEKSLNKIMLIG
--PCEDD-HHL---PTV-QFDF-TG-I--D-DL-ENKSK-D--SL-V-D--IIGICKSY-
   || |   |     |  |   |     |    | ||| |     | |  |      | 
RVGCEPDIKILNGGDKVATFSLATNEFWRDRNTNELKSKTDWHRIVVYDQNIVDLIDKYL
EDATKITVR-S-NNRE--V--AK-RNI--YLMD-TSGKVVTATLWGEDA-DK--FDG--S
       |  |   |           |         |         |    |    |   
RKGRRVYVQGSLHTRKWHTNNSQPKQITEIILSYNKGDLIFLDM-NEKSLNKIMLIGRVG
RQP-VLAIKGA-RVSDF--G-G---RSLSVLSSST----IIA---N-PDIPEAY--K-LR
  |      |   |  |        |    | | |    |     |  |    |  |  |
CEPDIKILNGGDKVATFSLATNEFWRDRNELKSKTDWHRIVVYDQNIVDLIDKYLRKGRR
----G------WF-DA------E-------G-----Q
    |      |          |       |      
VYVQGSLHTRKWHTNSQPKQITEIILSYNKGDLIFLD
1jmc 3ulp   91  238  456  38.24  19.96
-----KV-----V---PI---A------------------S-------L-T-P-YQ----
     ||          |   |                  |       | |   |     
PDKLKKVLDKLRLKRKDISEAAETVNKVVERLLRRMQKRESEFKGVEQLNTGSYYEHVKI
S---KWTI---C-A-RV-------TN-----K-SQI-R-T-WSN-SRGE---G-K-L--F
|              |        |      |   | |    |    ||     | |  |
SAPNEFDVMFKLEVPRIELQEYYETGAFYLVKFKRIPRGNPLSHFLEGEVLSATKMLSKF
-S-L--EL--V-D-E-SGE-IR----A-T-AF-N-EQ--VD-------K-FFP------L
      |     |   | |       | |    | |   ||       |   |      |
RKIIKEEVKEIKDIDVSVEKEKPGSPAVTLLIRNPEEISVDIILALESKGSWPISTKEGL
-IE------V--N--K-VYYF----SK------G-T--L------K-IA-N----K---Q
 |       |  |      |      |      | |  |      | |  |    |    
PIQGWLGTKVRTNLRREPFYLVPKNAKDGNSFQGETWRLSFSHTEKYILNNHGIEKTCCE
FT-A-----------------VKNDY-EM-TF-N-N-ETSV--M-----------P----
   |                  |    |   |      |    |           |    
SSGAKCCRKECLKLMKYLLEQLKKEFQELDAFCSYHVKTAIFHMWTQDPQDSQWDPRNLS
-C---------E----D--DHH-LP--TV--Q--FD-----F-T---------G--I-D-
 |         |       ||   |      |   |     |           |  | | 
SCFDKLLAFFLECLRTEKLDHYFIPKFNLFSQELIDRKSKEFLSKKIEYERNNGFPIFDK
------D-LENKSKD-S--------LVD-II-----------GI--CK--S-Y-------
      | |  | || |         |               |       | |       
KLKKVLDKLRLKRKDISEAAETVNKVVERLLRRMQKRESEFKGVEQLNTGSYYEHVKISA
--E-DAT-K-----I-------T-----V------RSN---N--R-EV--A-----K-RN
  | |   |     |       |     |      | |        ||  |     | | 
PNEFDVMFKLEVPRIELQEYYETGAFYLVKFKRIPRGNPLSHFLEGEVLSATKMLSKFRK
-I---Y--L--MDTS------GK-VVT---------------A----------T---L--
 |          | |      |   ||               |          |   |  
IIKEEVKEIKDIDVSVEKEKPGSPAVTLLIRNPEEISVDIILALESKGSWPISTKEGLPI
--W-G---------E-------DA-D--KFDG-S-R------QP-VL---AI-K------
  | |         |        | |   | |   |          |    | |      
QGWLGTKVRTNLRREPFYLVPKNAKDGNSFQGETWRLSFSHTEKYILNNHGIEKTCCESS
GA---R---VS--DF---G-GR---SLSVL-S-S-ST-I--I-A-NP-DI---P------
||   |                    |    |    | |       | |    |      
GAKCCRKECLKLMKYLLEQLKKEFQELDAFCSYHVKTAIFHMWTQDPQDSQWDPRNLSSC
-E---A-Y-K-LR----G-W-------F-----D-------A-----E---G-----Q
     |     ||              |     |             |   |      
FDKLLAFFLECLRTEKLDHYFIPKFNLFSQELIDRKSKEFLSKKIEYERNNGFPIFDK
1jmc 4o6a  123  238  718  51.68  17.13
--------KVVPIASLTP-Y-Q--SKWT--I----CARVTNKS-Q----I------R---
         ||          |             || |  ||      |      |   
PHMATGQDRVVALVDMDCFFVQVEQRQNPHLRNKPCAVVQYKSWKGGGIIAVSYEARAFG
-T---WS-NS-R-------G---E--GK--L--F---SLELVD-ES--G--E---I-RA-
 |   |                 |  ||  |      | |     |     |   |  | 
VTRSMWADDAKKLCPDLLLAQVRESRGKANLTKYREASVEVMEIMSRFAVIERASIDEAY
---T-AFNEQVDKF--FPL-IE-VNKVYY--FSKG---TL-KIA-NKQ--F----T-AVK
   | |  |   |    |         |      |   |  |    ||  |         
VDLTSAVQERLQKLQGQPISADLLPSTYIEGLPQGPEETVQKEGMRKQGLFQWLDSLQID
N----DYEMTFN----NE--TSV-----MPCE-D-DHH---------L--PTVQFDFT-G
|    |   |       |            |     |          |  |  |     |
NLTSPDLQLTVGAVIVEEMRAAIERETGFQCSAGISHNKVLAKLACGLNKPNRQTLVSHG
-IDDL--E---NK--S---K-D-SLVDIIGICKSYEDATKIT---VRSN----NRE-V-A
    |       |  |   |   |   | ||       |  |     |     |     |
SVPQLFSQMPIRKIRSLGGKLGASVIEILGI-EYMGELTQFTESQLQSHFGEKNGSWLYA
K-RNI-Y--L----M-DT---S----GKVVTAT---L--W----G---ED--A-DKFDGS
  | |            |   |    ||   ||      |        |     |  |  
MCRGIEHDPVKPRQLPKTIGCSKNFPGKTALATREQVQWWLLQLAQELEERLTKDRNDND
R---QPVLAIK--G-ARVSDF----G-GR-SLSVLS-SS-TII--ANPD-I-PE-AYKLR
|   | |  |   |  | |         |      |    | |   |   |  |    | 
RVATQLVVSIRVQGDKRLSSLRRCCALTRYDAHKMSHDAFTVIKNCNTSGIQTEWSPPLT
GWF-DA-E--GQ
  |  |      
MLFLCATKFSAS
1jmc 4ecw   86  238  431  36.13  19.95
-KV--VP-IASL----TP-YQ-SKWTICARVT-----NK-S-Q-I-R-TWSNSRGEGKLF
     |  |  |    |   |    |     |      | |       |  | ||     
DETERVTLIVTLGHADTARIQAAPGTTAGQGTQYFWLSKDSYDFFPPLTIRNRRGTKATY
-SL-EL--VD-E-SG-EIRAT--A-FN-E-QV--DKF-FP-LIEVNKVYYFSK-G-T---
 ||      |        | |  |  |        |         |        |     
SSLINMNYIDINYTDTQCRVTFEAENNFDFRLGTGKLRYTGVAKSNDIAAITRVGDSDYE
LKIANKQFTAV-KN-D-YEMTF--N-NET-SVMPCEDDHHLPTVQF-D-------F-T-G
| |  || |      | |   |  |          |       | | |         | |
LRII-KQGTPEHSQLDPYAVSFIGNRGKRFGYISNEEFGRIIGVTFLDETERVTLIVTLG
-IDD--LE---NKSKDSLVDIIGICK-SYEDATKITVRSNNREV-A--KR--NI-YL-MD
  |                      | ||      | | | |   |      |  |    
HADTARIQAAPGTTAGQGTQYFWLSKDSYDFFPPLTIR-NRRGTKATYSSLINMNYIDIN
TSGKVVTATLWGE-DAD-KF-DGS-RQP-VL-A--IKG-ARVSDFGGRSLSVLSSSTIIA
        |   |   |     |  |   |     |    || |     |      |   
YTDTQCRVTFEAENNFDFRLGTGKLRYTGVAKSNDIAAITRVGD-SDYELRIIKQGT-PE
NPDI-PEA--Y---K-LR-GWF-DAE-GQ------
     | |         | |     | |       
HSQLDPYAVSFIGNRGKRFGYISNEEFGRIIGVTF
1jmc 3zi5   67  238  331  28.15  20.24
K----VV-PI-ASL-T--PYQSKW-TI-CA--R--V-TNK-SQ-IR-TWSNSRGE-G-KL
     |  |          ||     | |   |  |                    |   
SHMTYVILPLEMKKGRGYVYQLEYHLIWCVKYRHQVLVGEVADGLKDILRDIAAQNGLEV
FSLELV-D--E---SG---E-I-------R-ATA---F--NEQV-DK-F----F-P---L
   |   |      |      |         | |   |    |   |        |    
ITMEVMPDHVHLLLSATPQQAIPDFVKALKGASARRMFVAYPQLKEKLWGGNLWNPSYCI
IEV--N-K--V--Y-----Y------FSK--G-T--LK---I--AN-K-Q-FTA-VKN--
  |  |       |     |        |  |    |    |       |     |    
LTVSENTRAQIQKYIESQTYVILPLEMKKGRGYVYQLEYHLIWCVKYRHQVLVGEVADGL
-D-Y-EMTFNNETSVMPCE--DDH-H--L---P--TV-QF-------D----F-T-----
 |        |   |   |   || |  |   |      |            |       
KDILRDIAAQNGLEVITMEVMPDHVHLLLSATPQQAIPDFVKALKGASARRMFVAYPQLK
-----G-I-D-D---L---EN-KS---K--D---S-L--V--DI-I----G---------
     |         |   ||      |      |    |          |         
EKLWGGNLWNPSYCILTVSENTRAQIQKYIESQGSHMTYVILPLEMKKGRGYVYQLEYHL
I-C-K-SY-----E--DATK-I--TVRSNNR-EV-A-K-R--NIY-LM---------D-T
| | |        |  |  | |       |  ||            |          |  
IWCVKYRHQVLVGEVADGLKDILRDIAAQNGLEVITMEVMPDHVHLLLSATPQQAIPDFV
-S--G----KV-VT-----ATLW-G-------------ED--A--DKF-----DGSRQ--
    |       |        || |             |   |   |      |||    
KALKGASARRMFVAYPQLKEKLWGGNLWNPSYCILTVSENTRAQIQKYIESQHDGSHMTY
---P---------V------L--AIK-------G--A---R-V-SDF---GG-R--SLSV
   |         |      |    |       |  |        |     |       |
VILPLEMKKGRGYVYQLEYHLIWCVKYRHQVLVGEVADGLKDILRDIAAQNGLEVITMEV
LSSST--II-ANP-D-IPE---------------AY-----KL-RG--W---F------D
          | |   ||                ||     ||  |  |           
MPDHVHLLLSATPQQAIPDFVKALKGASARRMFVAYPQLKEKLWGGNLWNPSYCILTVSE
---A------EGQ
   |      | |
NTRAQIQKYIESQ
1jmc 2xma   93  238  553  39.08  16.82
KV-VPIASLTPYQSKWTICARV-T----NKS-QI--RTWS-NSRGEGKLFSLEL-VDE--
    |   |    |    |    |    ||   |            | |       ||  
LADHP-GELVRTDSPNFLCSVLPTHWRCNKTLPIAFKVVALGDVPDGTLVTVMAGNDENY
SGEIR-AT-AFNEQVDKFFPLIEVNKVYYFSKG-TLKIANKQFTAVKNDYEM-TFNNETS
| | | || |   ||  |  |  |       |  || |    ||   |     |      
SAELRNATAAMKNQVARFNDLRFVGRSGR-GKSFTLTI-T-VFT---NPPQVATYHRAIK
VMPCEDDHHLPTVQFDFT-GIDDLENKSKDSL-VDIIGICKSYEDATK-ITVRSNNREVA
     |    |     |      ||        |   |            |  |      
I-TV-DGPREPRGSLSFSERLSELEQLRRTAMRVS-SGPIQLWQFLLELLTDKSCQSFIS
-KRNIYLMDTSGKVVTATLWGEDADKFDGSRQPVLAIKGARVSDFGGRSLSVLSSSTIIA
          |     |  ||    |        |   | |                   
WTGDGWEFKLSDPDEVARRWGKRKNK-PKMNYEKLS-RGLRYY-YDKNIIHKTAGKRYVY
NPDIPEAYKLRGWFDAE--GQ
         | |    |    
R-FVCDLQSLLGYTPEELHAM
1jmc 4l0z   51  238  247  21.43  20.65
---K--V--V-PIAS-LTPYQSKW-TI-CARV-TNKSQI--RTWSNSRGEGK---L-F--
   |  |    |    |  | |                |       || |||     |  
NIKKNQVMNLGPNSKLLKEYKSQLIELNIEQFEAGIGLILGDAYIRSRDEGKTYCMQFEW
---S-LE---LV-D----------E--S--GE--IR--A-T----AFNE--Q---V-D-K
          |  |          |     |   |   | |    |||       |   |
KNKAYMDHVCLLYDQWVLSPPHKKERVNHLGNLVITWGAQTFKHQAFNKLANLFIVNNKK
FFP--LIE--VN--KV-YYF---------SK-GTLK-IA-NKQ-FT---A---VK---ND
  |  | |         | |          |  | | |  | | ||       ||   | 
TIPNNLVENYLTPMSLAYWFMDDGGKWDYNKNSTNKSIVLNTQSFTFEEVEYLVKGLRNK
YEMT-F-N-NETS-VMPCED-DH---H-L--P-TV-Q--FDFTGI--D---DL-EN-K-S
         |                  |  |    |       |       |  | |  
FQLNCYVKINKNKPIIYIDSMSYLIFYNLIKPYLIPQMMYKLPNIKKNQVMNLGPNSKLL
KD--S-LVD--I------IG-IC-KSY---EDATK-ITVRSNNREVA-KRNIYLM-D--T
|   | |    |      || |    |    |  |           |      |  |   
KEYKSQLIELNIEQFEAGIGLILGDAYIRSRDEGKTYCMQFEWKNKAYMDHVCLLYDQWV
-S---GK--V--V-TATL-WG-E----DA-DK----F--DGSRQ-P---V---LA-IKGA
 |    |  |         ||       |  |    |        |   |   |     |
LSPPHKKERVNHLGNLVITWGAQTFKHQAFNKLANLFIVNNKKTIPNNLVENYLTPMSLA
R-VSDFGG-----R-SL--S-VLSS-S-T---I---I-A--N--P-D----I----P---
    | ||       |   | ||   | |            |         |    |   
YWFMDDGGKWDYNKNSTNKSIVLNTQSFTFEEVEYLVKGLRNKFQLNCYVKINKNKPIIY
-E--A----YKL-RGWFDAE--GQ--
         | |              
IDSMSYLIFYNLIKPYLIPQMMYKLP
1jmc 1r7m   88  238  446  36.97  19.73
------------------------------K-------VV------P---------IA--
                              |       ||      |         ||  
YVVTAQKPTAVNGCVTGHFTSAEDLNLLIAKNTRLEIYVVTAEGLRPVKEVGMYGKIAVM
--------S---------------L----------------------------T------
        |               |                            |      
ELFRPKGESKDLLFILTAKYNACILEYKQSGESIDIITRAHGNVQDRIGRPSETGIIGII
---------------------------------------------------P-----Y--
                                                   |     |  
DPECRMIGLRLYDGLFKVIPLDRDNKELKAFNIRLEELHVIDVKFLYGCQAPTICFVYQD
-Q---------S-------K--W-------------------------------------
 |         |       |  |                                     
PQGRHVKTYEVSLREKEFNKGPWKQENVEAEASMVIAVPSPFGGAIIIGQESITYHNGDK
------------------------------------------------------------
                                                            
YLAIAPPIIKQSTIVCHNRVDPNGSRYLLGDMEGRLFMLLLEKEEQVTLKDLRVELLGET
---------------------------------------------T----I---------
                                             |    |         
SIAECLTYLDNGVVFVGSRLGDSQLVKLNVDSNEQGSYVVAMETFTNLGPIVDMCVVDLE
---------C---------------------A----------------------------
         |                     |                            
RQGQGQLVTCSGAFKEGSLRIIRNGIGIHEHASIDLPGIKGLWPLRSDPNRETDDTLVLS
-----R-------------V----T----N------------------------------
     |             |    |    |                              
FVGQTRVLMLVEETELMGFVDDQQTFFCGNVAHQQLIQITSASVRLVSQEPKALVSEWKE
---K---------S-------------QI-----R----------------T--------
   |         |             ||     |                |        
PQAKNISVASCNSSQVVVAVGRALYYLQIHPQELRQISHTEMEHEVACLDITPLGDSNGL
--------W-------------------------------------S-------------
        |                                     |             
SPLCAIGLWTDISARILKLPSFELLHKEMLGGEIIPRSILMTTFESSHYLLCALGDGALF
----N------S-R-----G----------------------------------------
    |      | |     |                                        
YFGLNIETGLLSDRKKVTLGTQPTVLRTFRSLSTTNVFACSDRPTVIYSSNHKLVFSNVN
--E--------------------------G------K-------L---------------
  |                          |      |       |               
LKEVNYMCPLNSDGYPDSLALANNSTLTIGTIDEIQKLHIRTVPLYESPRKICYQEVSQC
F----------------------------------S------------------------
|                                  |                        
FGVLSSRIEVQDTSGGTTALRPSASTQALSSSVSSSKLFEEVEVHNLLIIDQHTFEVLHA
---L--E----LV------D-----------------E-----------S----------
   |  |    ||      |                 |           |          
HQFLQNEYALSLVSCKLGKDPNTYFIVGTAMVYPEEAEPKQGRIVVFQYSDGKLQTVAEK
---G------E--------I---------------R----------A----T--------
   |      |        |               |          |    |        
EVKGAVYSMVEFNGKLLASINSTVRLYEWTTEKELRTECNHYNNIMALYLKTKGDFILVG
----------------------------------------------AFN-----------
                                              |||           
DLMRSVLLLAYKPMEGNFEEIARDFNPNWMSAVEILDDDNFLGAENAFNLFVCQKDEERQ
-----------E----------------Q--------------V------------D---
           |                |              |            |   
HLQEVGLFHLGEFVNVFCHGSLVMQTPTQGSVLFGTVNGMIGLVTSLSESWYNLLLDMQN
----------K----F---F-------P-------------L-I------E-V-N----K
          |    |   |       |             | |      | | |    |
RLNKVIKSVGKIEHSFWRSFHTERKTEPATGFIDGDLIESFLDISRPKMQEVVANDDLIK
-V-------------Y-Y-------------------F-----S-K--------------
 |             | |                   |     | |              
VVEELTRIHQTSILHYIYKSSLGQSIHAQLRQCLQEPFIRSLKSYKLHRTASPFDRRVTS
-------------GT------L-------K---I-------A-----------N------
             |       |       |   |       |           |      
LEWHPTHPTTVAVGSKGGDIILWDYDVQNKTSFIQGMGPGDAITGMKFNQFNTNQLFVSS
-------------------K-----------------Q----------------------
                   |                 |                      
IRGATTLRDFSGSVIQVFAKTDSWDYWYCCVDVSVSRQMLATGDSTGRLLLLGLDGHEIF
-------------F---------T----A-VK-----N--D-----------------Y-
             |         |    | ||     |  |                 | 
KEKLHKAKVTHAEFNPRCDWLMATSSVDATVKLWDLRNIKDKNSYIAEMPHEKPVNAAYF
---------------E-----------------------------------M--------
               |                                   |        
NPTDSTKLLTTDQRNEIRVYSSYDWSKPDQIIIHPHRQFQHLTPIKATWHPMYDLIVAGR
--------------------------------------------T---------FN----
                                            |         ||    
YPDDQLLLNDKRTIDIYDANSGGLVHQLRDPNAAGIISLNKFSPTGDVLASGMGFNILIW
N-E-----------------------TS--------------------------------
| |                       ||                                
NREMSYNYVVTAQKPTAVNGCVTGHFTSAEDLNLLIAKNTRLEIYVVTAEGLRPVKEVGM
-----VM----P-----------------C------------------------------
     ||    |                 |                              
YGKIAVMELFRPKGESKDLLFILTAKYNACILEYKQSGESIDIITRAHGNVQDRIGRPSE
---------E------------------D-D--------------H--------------
         |                  | |              |              
TGIIGIIDPECRMIGLRLYDGLFKVIPLDRDNKELKAFNIRLEELHVIDVKFLYGCQAPT
-----------H-------L---------------------------P------------
           |       |                           |            
ICFVYQDPQGRHVKTYEVSLREKEFNKGPWKQENVEAEASMVIAVPSPFGGAIIIGQESI
T--------------V-Q------------------------------------------
|                |                                          
TYHNGDKYLAIAPPIIKQSTIVCHNRVDPNGSRYLLGDMEGRLFMLLLEKEVTLKDLRVE
-------------------F---------------D-------------FT--G-I-D--
                   |               |             ||  | | |  
LLGETSIAECLTYLDNGVVFVGSRLGDSQLVKLNVDSNEQGSYVVAMETFTNLGPIVDMC
--D--------L--------E-------N---------------K------S---K---D
  |        |        |       |               |      |       |
VVDLERQGQGQLVTCSGAFKEGSLRIIRNGIGIHEHASIDLPGIKGLWPLRSDPNRETDD
----S--------------L---V-D----------------I-----------------
    |              |   | |                |                 
TLVLSFVGQTRVLMLNETELMGFVDDQQTFFCGNVAHQQLIQITSASVRLVSQEPKALVS
---------I--------------G-----------------------------I-----
         |              |                             |     
EWKEPQAKNISVASCNSSQVVVAVGRALYYLQIHPQELRQISHTEMEHEVACLDITPLGD
-------C----------------------K-------S-----YE----------D-A-
       |                      |       |      |          | | 
SNGLSPLCAIGLWTDISARILKLPSFELLHKEMLIIPRSILMTTFESSHYLLCALGDGAL
--------T-------K--------I---------T-V-----R-------------SN-
        |       |                  | |     |             || 
FYFGLNIETGLLSDRKKVTLGTQPTVLRTFRSLSTTNVFACSDRPTVIYSSNHKLVFSNV
N-REV-----------------A----------------------------K--------
|  ||                 |                            |        
NLKEVNYMCPLNSDGYPDSLALANNSTLTIGTIDEIQKLHIRTVPLYESPRKICYQEVSQ
---------------------R------------------------N---I---------
                     |                        |   |         
CFGVLSSRIEVQDTSGGTTALRPSASTQALSSSVSSSKLFEEVEVHNLLIIDQHTFEVLH
--------Y--------L-------------M-------------------D----T---
        |        |             |                   |    |   
AHQFLQNEYALSLVSCKLGKDPNTYFIVGTAMVYPEEAEPKQGRIVVFQYSDGKLQTVAE
--------S-----GK----V---V------------T---------A----T-------
        |     ||        |            |         |    |       
KEVKGAVYSMVEFNGKLLASINSTVRLYEWTTEKELRTECNHYNNIMALYLKTKGDFILV
---------L-------------------W-------------G-E----------D--A
         |                   |             | |          |  |
GDLMRSVLLLAYKPMEGNFEEIARDFNPNWMSAVEILDDDNFLGAENAFNLFVCQKDSAA
--D--K---------------------------------F--------------------
  |                                    |                    
TTDEERQHLQEVGLFHLGEFVNVFCHGSLVMQPTQGSVLFGTVNGMIGLVTSLSESWYNL
--D------------G--------S----R--QP---------V---L------------
  |            |        |    |   |             |            
LLDMQNRLNKVIKSVGKIEHSFWRSFHTERKTEPATGFIDGDLIESFLDISRPKMQEVVA
---A----------------------I-K---G---------------------------
   |                      | |   |                           
NATADDLIKVVEELTRIHGQTSILHYIYKSSLGQSIHAQLRQCLQEPFIRSLKSYKLHRT
A-----R---------------V-S----------D------F-----------G-----
|     |               | |          |      |           |     
ASPFDRRVTSLEWHPTHPTTVAVGSKGGDIILWDYDVQNKTSFIQGMGPGDAITGMKFNQ
------------G----R----S-L-------S-------V-LS-S--------ST----
            |    |    |         |       |  | |        ||    
FNTNQLFVSSIRGATTLRDFSGSVIQVFAKTDSWDYWYCCVDVSVSRQMLATGDSTGRLL
--------I---------I--A--NP------------------------D----I---P
        |            |  ||                        |    |   |
LLGLDGHEIFKEKLHKAKVTHAEFNPRCDWLMATSSVDATVKLWDLRNIKDKNSYIAEMP
-E-----AY-------K-L--------R---G--W-------------F-----------
 |     ||       | |        |      |             |           
HEKPVNAAYFNPTDSTKLLTTDQRNEIRVYSSYDWSKPDQIIIHPHRQFQHLTPIKATWH
---D---A-------------------E----G---Q-----------------------
   |   |                        |   |                       
PMYDLIVAGRYPDDQLLLNDKRTIDIYDANSGGLVHQLRDPNAAGIISLNKFSPTGDVLA
-------------
             
SGMGFNILIWNRE
1jmc 4a0b  223  238 2893  93.70   7.71
KVVPIASLTPY-Q-SKW-TI-CA-RVT-NKSQ--I--R-TWS-NS-R--GEGKLFSLELV
   |   | |         |  |   | | |   |  |            | |||     
ILKPGEKL-PQDKLEELKKINDAVKKTKNFSKYLIDLRKLFQIDEVQVTSESKLFLAGFL
D-ESG-EI---R-ATA-FNEQVDKFFPLI-EVN--KV-Y----YF-S-----K-G---T-
  |    |     ||  |   ||  |     ||  || |     |       | |   | 
EGEASLNISTKKLATSKFGLVVDPEFNVTRHVNGVKVLYLALEVFKTGRIRHKSGSNATL
-LKIAN------K------Q----FTA---VKN--DYE--M-TFNN------E--TS-VM
 | | |      |      |    |     ||           |||      |       
VLTIDNRQSLEEKVIPFYEQYVVAFSSPEKVKRVANFKALLELFNNDAHQDLEQLVNKIL
PCED--------DHH-LPTVQ-F-DFT-----G--I-DD-L-E----N----KSKD-S--
|  |             |      ||      |     | | |    |    | |  |  
PIWDQMRKQQGQSNEGFPNLEAAQDFARILKPGEKLPQDKLEELKKINDAVKKTKNFSKY
LVD------I--IGI---CK---S-Y-E-DA-----T-KI-TVRSN---NRE--VAKR-N
| |      |         |       |  |     | |  |         |  |    |
LIDLRKLFQIDEVQVTSESKLFLAGFLEGEASLNISTKKLATSKFGLVVDPEFNVTRHVN
---I-YL-MDT--SGKV---V-T-ATL-WG-ED--A--DK-FDGSRQPVLAIKG-ARVSD
     ||       |         |||            |      | | |      |  
GVKVLYLALEVFKTGRIRHKSGSNATLVLTIDNRQSLEEKVIPFYEQYVVAFSSPEKVKR
FGG-RS-LSVLSS-S--TI--IANPDIP--EAY-KLRG----WF-DAE-GQ----
       |               |   |      |  |     |   |  |    
VANFKALLELFNNDAHQDLEQLVNKILPIWDQMRKQQGQSNEGFPNLEAAQDFAR
1jmc 2ex5   87  238  414  36.55  21.01
---------------------------------------K--VV------------P---
                                       |  ||            |   
MMFVHIADNHLGYRQYNLDDREKDIYDSFKLCIKKILEIKPDVVLHSGDLFNDLRPPVKA
-------------------I-A------------S-----------L-------------
                   | |            |           |             
LRIAMQAFKKLHENNIKVYIVAGNHEMPRRLGEESPLALLKDYVKILDGKDVINVNGEEI
----T----------------------------------------P--Y--Q-------S
    |                                        |  |          |
FICGTYYHKKSKREEMLDKLKNFESEAKNYKKKILMLHQGINPYIPLDYELEHFDLPKFS
--------K------------W---T----------------------------------
        |                |                                  
YYALGHIHKRILERFNDGILAYSGSTEIIYRNEYEDYKKEGKGFYLVDFSGNDLDISDIE
---I-C----------------A-----R------V-------------T-------NK-
   | |                |     |      |             |       || 
KIDIECREFVEVNIKDKKSFNEAVNKIERCKNKPVVFGKIKREFKPWFDTLKDKILINKA
--------------S---------------Q--I--R------TW---------------
              |               |     |                       
IIVDDEFIDMPDRGSHMMFVHIADNHLGYRQYNLDDREKDIYDSFKLCIKKILEIKPDVV
--S----N-------S-R--------------------G--E-----G------------
  |    |         |                    |  |     |            
LHSGDLFNDLRPPVKALRIAMQAFKKLHENNIKVYIVAGNHEMPRRLGEESPLALLKDYV
K-L-------------F---------S--------L-----E----------L-------
| |             |         |        |     |          |       
KILDGKDVINVNGEEIFICGTYYHKKSKREEMLDKLKNFESEAKNYKKKILMLHQGINPY
V--D---E-------S----G---E-I--R------A----T------------------
   |   |       |    |     |  |      |    |                  
IPLDYELEHFDLPKFSYYALGHIHKRILERFNDGILAYSGSTEIIYRNEYEDYKKEGKGF
--A-F--N---------------E--QV---D----------------K---F------F
    |  |               |   |   |                |   |      |
YLVDFSGNDLDISDIEKIDIECREFVEVNIKDKKSFNEAVNKIERCKNKPVVFGKIKREF
-P---------L-----I---E----------V------------N-----K-VY-----
 |         |     |   |          |            |     |  |     
KPWFDTLKDKILINKAIIVDDEFIDMPDNMMFVHIADNHLGYRQYNLDDREKDIYDSFKL
-------------------Y----------------F-----------------------
                                    |                       
CIKKILEIKPDVVLHSGDLFNDLRPPVKALRIAMQAFKKLHENNIKVYIVAGNHEMPRRL
---S--------------K-------------GT-----------L-KI------A-N--
   |              |             ||           | |       | |  
GEESPLALLKDYVKILDGKDVINVNGEEIFICGTYYHKKSKREEMLDKLKNFESEAKNYK
-K-----Q-------------------FT--A---V-K----------------------
 |     |                   |   |     |                      
KKILMLHQGINPYIPLDYELEHFDLPKFSYYALGHIHKRILERFNDGILAYSGSTEIIYR
N---DY--E-------------M------------------------TF----N------
|   ||  |                                       |    |      
NEYEDYKKEGKGFYLVDFSGNDLDISDIEKIDIECREFVEVNIKDKKSFNEAVNKIERCK
N----------E------T---------S--V-----M----------------------
|          |      |            |     |                      
NKPVVFGKIKREFKPWFDTLKDKILINKAIIVDDEHMMFVHIADNHLGYRQYNLDDREKD
-----P-C-----E----------D---D------------------H------------
       |     |          |   |                  |            
IYDSFKLCIKKILEIKPDVVLHSGDLFNDLRPPVKALRIAMQAFKKLHENNIKVYIVAGN
H-----L----P----------------------------T-------------------
|     |    |                            |                   
HEMPRRLGEESPLALLKDYVKILDGKDVINVNGEEIFICGTYYHKKSKREEMLDKLKNFE
---------V----Q--------------FD-------------------F---------
              |              ||                   |         
SEAKNYKKKILMLHQGINPYIPLDYELEHFDLPKFSYYALGHIHKRILERFNDGILAYSG
-T----------------G---ID----DL----------------E-N----KS-----
 |                |    |    ||                | |    ||     
STEIIYRNEYEDYKKEGKGFYLVDFSGNDLDISDIEKIDIECREFVEVNIKDKKSFNEAV
--------------------K---DS-----L------V-D-------I-I-----G---
                    |   |      |      | |         |     |   
NKIERCKNKPVVFGKIKREFKPWFDTLKDKILINKAIIVDDEGSHMMFVHIADNHLGYRQ
---------I------C-------K------S---YED----------A--T--K-----
         |      |       |      |     |          |     |     
YNLDDREKDIYDSFKLCIKKILEIKPDVVLHSGDLFNDLRPPVKALRIAMQAFKKLHENN
I-T--V--------R----S------------------N-N----------------R-E
|    |        |    |                  | |                | |
IKVYIVAGNHEMPRRLGEESPLALLKDYVKILDGKDVINVNGEEIFICGTYYHKKSKREE
----V------A----KR--------N--I----------------Y-L-------M---
           |    |         |  |                | |           
MLDKLKNFESEAKNYKKKILMLHQGINPYIPLDYELEHFDLPKFSYYALGHIHKRILERF
-D--------T-----------------------SG---------K--------V-V---
 |        |                       ||         |        | |   
NDGILAYSGSTEIIYRNEYEDYKKEGKGFYLVDFSGNDLDISDIEKIDIECREFVEVNIK
---T---A------------T---L------W------------G-----E--D------
       |                       |                  |  |      
DKKSFNEAVNKIERCKNKPVVFGKIKREFKPWFDTLKDKILINKAIIVDDEFIDMPSHMM
----A------------D--K-----F------------D-----G---S--RQPV--L-
    |            |  |     |            |     |      | ||  | 
FVHIADNHLGYRQYNLDDREKDIYDSFKLCIKKILEIKPDVVLHSGDLFNDLRPPVKALR
----A--------IK-----G-----ARV---S------DF-------------G-----
    |        ||     |      |    |      |              |     
IAMQAFKKLHENNIKVYIVAGNHEMPRRLGEESPLALLKDYVKILDGKDVINVNGEEIFI
-G--------R-----------S------------------------------L---S--
 |        |           |                              |   |  
CGTYYHKKSKREEMLDKLKNFESEAKNYKKKILMLHQGINPYIPLDYELEHFDLPKFSYY
----------------VLS-S-ST-II--------------------A-N--------P-
                 |  | || ||                      |          
ALGHIHKRILERFNDGILAYSGSTEIIYRNEYEDYKKEGKGFYLVDFSGNDLDISDIEKI
DI---P--E-------AY-----KL-R--------G--------WFDA--E----GQ---
||      |              |  |        |        |||             
DIECREFVEVNIKDKKSFNEAVNKIERCKNKPVVFGKIKREFKPWFDTLKDKILINKAII
-
 
V
1jmc 4tug  187  238 1861  78.57  10.05
KVVP-IA----SLTPYQSKWTI-CARV-TNK--S-QI----RTWS-N-S-RGEGKLFSLE
   | |        |     |  |  |   |    |       |  |   |  |     |
PPRPWITLKERDILP-SASFTVMCYNVLCDKYATRQLYGYCPSWALNWEYRKKG-IME-E
LVD-ESGEIRATAF-NEQ-VDKFFPLIEVNKVY--YFS-KGTLKIANKQ---FT---AV-
 |      |       ||    | |       |   || |   ||   |        |  
IVNCDADIISLQEVETEQYFTLFLPALK-ERGYDGFFSPKSRAKIMSEQERKHVDGCAIF
-KND-YEMT-FNN-E-TSV-MPCED--DHHLPTVQF-DFTGID-DLE-NKS--KDSL-V-
 |            |   | |   |     |  |   |  |    ||  |   |  | | 
FKTEKFTLVQKHTVEFNQVAMANSDGSEAMLNRVMTKDNIGVAVVLEVHKELFKQLLIVA
DI-IGICKSYEDATKI-TVR--SNNREV-AKRNIYL-M--D-TS--GK-VVT-ATLWG-E
         | |   | |    |       |  | |    |  |     ||      |  
NAHMHWDPEYSDVKLIQTMMFVSEVKNILEKASIPLVLCADLNSLPDSGVVEYLSNGGVA
D--AD-K--F-D---G-SR-QPVLAIKGA---R-V-----S-DF-G-------GR---S-
|   | |          ||       | |             || |              
DNHKDFKELYNECLMNFSRITHGFQLKSAYENNLMPYTNYTFDFKGVIDYIFYSKTHMNV
LSVLS--S-STIIA-N------PDIP-EAYKLRGWFDAEGQ
| ||           |      | ||     |         
LGVLGPLDPQWLVENNITGCPHPHIPSDHFSLLTQLELH-P
1jmc 3ngo   73  238  336  30.67  21.73
----------------------------------K------V--V---------------
                                  |      |  |               
QWSGARALEALLTVAGELRGPPLQLDTGQLLKIAKRGGVTAVEAVHAWRNALTGAPLNLT
P-----IAS-------L-T-----P-----Y-----Q-----S----K--W-T------I
|     |||       | |     |           |     |    |    |       
PEQVVAIASHDGGKQALETVQRLLPVLCQAHGLTPQQVVAIASHDGGKQALETVQRLLPV
-C-A------R-V---T-N--K----S-Q----I--R----T--W-----SN--------
 | |        |        |      |            |        ||        
LCQAHGLTPEQVVAIASHDGGKQALETVQALLPVLCQAHGLTPEQVVAIASNGGGKQALE
S--R---------G----E---------GK------------------L-------F-S-
   |         |              ||                  |         | 
TVQRLLPVLCQAHGLTPQQVVAIASNGGGKQALETVQRLLPVLCQAHGLTPQQVVAIASN
------LE-----L-V---------DE-----S---G----E-I-R-------A---T--
      ||     | |                |   |    |   |       |   |  
GGGKQALETVQRLLPVLCQAHGLTPQQVVAIASNNGGKQALETVQRLLPVLCQAHGLTPQ
---AF--N---EQ----VDKFFP-L-----I---E-V-----N--K-----V---Y-YF-
   |   |    |    |    | |           |     |  |     |        
QVVAIASNGGGKQALETVQRLLPVLCQAHGLTPQQVVAIASNNGGKQALETVQRLLPVLC
-SKG-T----LKIA-N---KQ-F-T----------A--------V---KND-----YE--
   | |      || |   ||   |          |        |     |      |  
QAHGLTPEQVVAIASNGGGKQALETVQRLLPVLCQAHGLTPEQVVAIASHDGGKQALETV
------------MT------F-NN-------ETSV--M----P--------------C--
             |         |       |  |       |              |  
QRLLPVLCQAHGLTPQQVVAIASNGGGRPALESIVAQLSRPDPALAALTNDHLVALACLG
-E---D-----D--HH-----------------L---P-----------------T-VQ-
     |        ||                 |   |                 | |  
GRPALDAVKKLEHHHHQWSGARALEALLTVAGELRGPPLQLDTGQLLKIAKRGGVTAVEA
---F-D-FTG------------I---D---D-LE------------N-----K-----S-
        ||            |   |     ||                        | 
VHAWRNALTGAPLNLTPEQVVAIASHDGGKQALETVQRLLPVLCQAHGLTPQQVVAIASH
---K---DS----L-V---------D--I-I-----G------------I-CKSY----E
   |         | |              |     |              |       |
DGGKQALETVQRLLPVLCQAHGLTPEQVVAIASHDGGKQALETVQALLPVLCQAHGLTPE
D----AT----K--I-TV-R--------------------SN--NR---E-------V--
     |     |    || |                    ||       |       |  
QVVAIASNGGGKQALETVQRLLPVLCQAHGLTPQQVVAIASNGGGKQALETVQRLLPVLC
-A-----KR------N---------I--YL--M-D----T--------S---GK-----V
 |             |             |         |        |   ||     |
QAHGLTPQQVVAIASNGGGKQALETVQRLLPVLCQAHGLTPQQVVAIASNNGGKQALETV
-----V-------T---------------A--T-------L---WG---ED----A--D-
     |       |               |  |       |    |         |    
QRLLPVLCQAHGLTPQQVVAIASNGGGKQALETVQRLLPVLCQAHGLTPQQVVAIASNNG
-K--FDG-SR------Q-----P--VLAI--K--G--A-----R---V-------S-D--
 |       |      |     |  | ||     |  |     |   |            
GKQALETVQRLLPVLCQAHGLTPEQVVAIASNGGGKQALETVQRLLPVLCQAHGLTPEQV
--F----GGR-SL-S------VL-SS-S-T----I-IA-N----P--D-I------PEA-
       ||   |        ||      |      || |    |    |      | | 
VAIASHDGGKQALETVQRLLPVLCQAHGLTPQQVVAIASNGGGRPALESIVAQLSRPDAL
---Y--KLR--GW---FDA-EG-Q-
       |   |     ||      
TNDHLVALACLGGRPALDAVKKLEH
1jmc 4gjp  139  238  985  58.40  14.11
KVVPIASLTPYQSKWTICARVTNKSQIRTWSNSRGEGKLFSLELVDESGEIRATAFNEQV
        || |      | |     | ||  |    | | |  |        |  ||  
SFSLLSQITPHQ-RCSFYAQV-----IKTW-YS--D-KNFTL-YV--T-DY--TE-NE-L
DKFFPLIEVNKVYYFSKGTLKIANKQFTAVKNDYEMTFNNETSVMPCEDDHHLPTVQFDF
  |||        |    |                  |          |  |      ||
--FFPM---SP--Y----T-S-SSR-W---RGPFG-RFSIR-CIL-W-DE-H------DF
TGIDDLENKSKDSLVDIIGICKSYEDATKITVRSNNREVAKRNIYLMDTSGKVVTATLWG
       |  |    |     |     |||              ||           | |
--Y--CRNYIKEG--DYV-VMKNVR--TKI----DH--L---G-YL-E----CI---LHG
EDADKFDGSRQPVLAIKGARVSDFGGRSLSVLSSSTIIANPDIPEAYKLRGWFDAEGQ
  | |    |     |    | |    |           |  |    | |        
DSA-K----RYN-MSIE--KV-D----S-E--EPE--L-N-EI-KSRK-R-LY-V---
1jmc 4hio   48  238  138  20.17  34.78
KVVPIASLTPY--QSKW-------TIC-A-R-------V--TN-KS--Q-I-RT-W-SNS
   |      |   | |       ||  | |       |  |      |   |  |    
Q-SPAGFAEEYIIESIWNNRFPPGTILPAERELSELIGVTRTTLREVLQRLARDGWLTIQ
RGE-GKL--F---S----LE-L--VD-ES-GE-I------R---A-----TAFNEQVDKF
 |   |   |   |    || |   | ||    |      |         |||    || 
HGKPTKVNNFWETSGLNILETLARLDHESVPQLIDNLLSVRTNISTIFIRTAFRQHPDKA
FP-L--I-EV----N---KV-Y--Y----FSKGT-L--KIAN--K-QFTAVKNDY----E
   |    ||           |       |  |      | |  |   |     |    |
QEVLATANEVADHADAFAELDYNIFRGLAFASGNPIYGLILNGMKGLYTRIGRHYFANPE
---MT--FNNETSVMPC-E---D---D------H------H-----LPTVQ--FDF-TGI
       |    |   | |   |          |      |     |   |       | 
ARSLALGFYHKLSAL-CSEGAHDQVYETVRRYGHESGEIWHRMQKNLLAIQGRAQSPAGF
-DD--LE----NK----S---KD-SLVDIIGICK-SY-E-------DA--T----KIT-V
      |    |             |   ||       |       |   |    | | |
AEEYIIESIWNNRFPPGTILPAERELSELIGVTRTTLREVLQRLARDGWLTIQHGKPTKV
----R-SN-N-RE-VAK---RNI-YLMD------TS-GKV-V-T--------A--TL-W-
      |  |  |  |         | |      |        |        |   |   
NNFWETSGLNILETLARLDHESVPQLIDNLLSVRTNISTIFIRTAFRQHPDKAQEVLATA
GE--D-ADKF---D-----G----SRQP----VL-AIKG--ARVS-D-F-G--GRSLSV-
 |  | || |   |     |    |  |     |   ||   |     |     |||   
NEVADHADAFAELDYNIFRGLAFASGNPIYGLILNGMKGLYTRIGRHYFANPEARSLALG
L-SS-STIIA-NP-D-IPE-A--Y-KLRG--WFDAE-GQ
     |        |   |    |    |  |       
FYHKLSALCSEGAHDQVYETVRRYGHESGEIWHRMQKNL
1jmc 1h9t   96  238  457  40.34  21.01
KVVPIASLTPYQSKWTICARVTNKSQIRTWSNSRGEGKLFSLELVDESGEIRATAFNEQV
  |  |   || |          |         |     |   | | ||           
R-V-FA---PY-S---V-FK--GKAAL-S-AEPR-L-PTFN-RL-D-SGGVKLNRRGVIM
DKFFPLIEVNKVYYFSKGTLKIANKQFTAVKNDYEMTFNNETSVMPCEDDHHLPTVQFDF
  | |     | |   |         | |     |       | |   |        | |
LTFWPSVGERK-YDWEK-R-QL----F-AL-SATEV--GSLIS-MGTRDS----S-EF-F
TGIDDLENKSKDSLVDIIGICKSYEDATKITVRSNNREVAKRNIYLMDTSGKVVTATLWG
   |     |  |     |                |        |    |  ||   |  
-H-DP-SMLS--S--N-AG--Q-VR-KS-LSIKP-NAD-GS-G-YFISLS--VVNNNL--
EDADKFDGSRQPVLAIKGARVSDFGGRSLSVLSSSTIIANPDIPEAYKLRGWFDA-EGQ
   | |     ||     |    |      |       |    |      || |     
KTNDRF--T-VPV-T-T-A---EF-----AVMRTAFSFA---LP--H-IMGW-DRFTNR
1jmc 3n1i   47  238  160  19.75  29.38
K-VVP----I-A--S------L-T-----------P--Y--------QSKWT--ICA--R
   ||    | |         | |           |             | |  | |   
SGIVPTLQNIVATVTLGCRLDLKTVALHARNAEYNPKRFAAVIMRIREPKTTALIFASGK
--VTN-KSQ----I--RTWSN--SR-G-EGKL--FSLE-LV---DESGEIR--ATAF-N-
  ||  ||        |         |   |   |     |   |    ||    ||   
MVVTGAKSEDDSKLASRKYARIIQKIGFAAKFTDFKIQNIVGSCDVKFPIRLEGLAFSHG
--EQVD-KFFP-LI-E-VN-K-V-YYF-S-K-G-T-LKIANK--Q-FTA---V-----K-
         || ||   |  | |   | | |   |  |      | | |   |     | 
TFSSYEPELFPGLIYRMVKPKIVLLIFVSGKIVLTGAKQREEIYQAFEAIYPVLSEFRKM
-NDYEM----TFNNE-TSVM-P-CED---DHHLP-TV-Q-FDFTGIDDL-EN-KSKDSL-
   ||     |  |           |      |   |   ||      |  |  ||    
PGYYELYRRSTIGNSLVDALDTLISDGRIEASLAMRVLETFDKVVAETLKDNTQSKLTVK
--VDIIGICKS-YEDATK---ITVR--S-NN-REVA-KRNIYLMDTSG--KVVTATLWGE
   |  | |        |    ||   |    | ||          |            |
GNLDTYGFCDDVWTFIVKNCQVTVEVISVDKLRIVACNSKKSNAEASRVYEIIVESVVNE
DADKFD--G-SRQPV--LA-I---K--GARVSDFG-GRSLS--VLS----SSTI-IANPD
    |   |   |    |  |   |     |  |           |             |
VREDFENAGIDEQTLQDLKNIWQKKLTETKVTTFSWDNQFNDYLISEDGPDENLMLCLYD
-I--PEA-YK--LR-G--------W-FD-A--EGQ--
      |  |  |  |          |  |  |    
KVTRTKARWKCSLKDGVVTINRNDYTFQKAQVEAEWV
1jmc 1rm1   84  238  397  35.29  21.16
KVVPIASLTPYQSKWTICARV-TNK-SQIRTWSN-SRGEGKLFSLELVDESGEIRATAFN
     ||       |  |  |   |      |    |         | |   | |     
-----ASI---KD-WIVC-QVNSGKFPGVE-WEDEERTRFRIPVTPLADPCFEWRRD--G
EQVDKFFPLIE-VNKVYYFS-KGTLKIANKQFTAVKNDYEMTFNNETSVMPCEDDHHLPT
|         |  |     | |||         |                   | ||   
E-LGVVY-IRERGNMPVDASFKGT-RGRRRMLAALRRTRGLQEIGK-GI--SQDGHHFLV
VQFDFTGIDDLENKSKDSLVDIIGICKSYEDATKITVRSNNREVAKRNIYLMDTSGKVVT
       | |       |     |     ||      |      |          |    
FRVRKASIKDWIVCQVNS-GKFPGV-E-WEDEERTRFRIPVTPLAD-PCFEWRRDGE-L-
ATLWGEDADKFDGSRQPV-LAIKGARVSDFGGRSLSVLSSSTIIANPDIPEAYKLRG-WF
            |   ||    || |      | |  |   |      |       |  |
GVVY--IRER--GN-MPVDASFKGTR-G--RRRMLAAL-RRT-RGLQEIGKGISQDGHHF
DA-EGQ
      
LVFRVR
1jmc 4hly   45  238  211  18.91  21.33
KVVPIASLTPYQSKWTICARVTNKSQIRTWSNSRGEGKLFSLELVDESGEIRATAFNEQV
           |       |  |   |  |  ||           |     |  |  |  
-----------QDR--V-KRPMN-AFI-VW--SR-----------DQ--R-RKMAL-E--
DKFFPLIEVNKVYYFSKGTLKIANKQFTAVKNDYEMTFNNETSVMPCEDDHHLPTVQFDF
    |    |     |     |  ||       |             |     |   | |
N---PRMR-N-----S----EI-SKQ---L-G-YQ--W--K--ML-TEAE-KWP---F-F
TGIDDLENKSKDSLVDIIGICKSYEDATKITVRSNNREVAKRNIYLMDTSGKVVTATLWG
      |   |  |            |         ||  |   |               
----Q-E-AQK--L----------Q-A----M---HRE--K---Y---PN--------Y-
EDADKFDGSRQPVLAIKGARVSDFGGRSLSVLSSSTIIANPDIPEAYKLRGWFDAEGQ
    |    | |       |           |           |   |          
----KY---R-P----R--R------KA-KML-----------P---K----------
1jmc 1j46   37  238   84  15.55  44.05
K--VVPI--ASLT---P---Y----Q-S-KW-T-----ICA-R-V--T-N-K---SQIRT
|   |    ||||   |   |           |     ||    |  |   |   |   |
KYEYVELAKASLTSAQPQHFYAVVIDATFPYKTNQERYICSLKIVDPTLYLKQDASDYAT
---WS----N----SR-GE-------------G-K-------------LF-----SL--E
               | |              |               ||     |   |
LVLYAKRFEDLPIIHRAGDIIRVHRATLRLYNGQRQFNANVFYSSSWALFSTDKRSVTQE
L-----V-D-------------ESGE--I----R--A---------------TAFNE-QV
      | |             |  |  |    |  |               || |  | 
INNQDAVSDTTPFSFSSKHATIEKNEISILQNLRKWANQYFSSYSVISSDMYTALNKAQA
DK--F--F-P-L-I-EV----N----K-----VYY-FS---K------G-TLKI--A---
 |  |      |   |     |    |     | |  |   |      |    |  |   
QKGDFDVVAKILQVHELDEYTNELKLKDASGQVFYTLSLKLKFPHVRTGEVVRIRSATYD
--N--KQ------F----T-------A--V--K--NDY--EM-TF--N---NE---TSV-
     |            |       |     |   |   |      |   |    | | 
ETSTQKKVLILSHYSNIITFIQSSKLAKELRAKIQDDHSVEVASLKKNVSLNAVVLTEVD
-----MP-CE-DD--HHLPT---V--Q--F--DF--TGID--DL-E-----N-KS-K-DS
      |     |  ||         |  |   |  | |   |  |       |  |  |
KKHAALPSTSLQDLFHHADSDKELQAQDTFRTQFYVTKIEPSDVKEWVKGYDRKTKKSSS
L--V----D-I--IG-ICK--S------------Y-ED---ATKITVRS-N---N---R-
|       | |       |  |            |  |   |    |   |   |   | 
LKGASGKGDNIFQVQFLVKDASTQLNNNTYRVLLYTQDGLGANFFNVKADNLHKNADARK
------E--------V-A---KRN-IYLM-DT--------SG-KVVTATLW-GE-D----
      |        | |    ||  ||  ||        |  |     |   | |    
KLEDSAELLTKFNSYVDAVVERRNGFYLIKDTKLIYPQQQSAFKQLYTELFNNEGDFSKV
-AD---------K-----F---DG--------SR----Q-----P-V-LA-I--K-----
            |     |   ||                    | |       |     
SSNLKKPLKCYVKESYPHFLVTDGYFFVAPYFTKEAVNEFHAKFPNVNIVDLTDKVIVIN
G-A----RV-S-D-F----G--GR----S--------L--S---V-L----S-SSTI---
       || |   |        |    |        |      | |        ||   
NWSLELRRVNSAEVFTSYANLEARLIVHSFKPNLQERLNPTRYPVNLFRDDEFKTTIQHF
----I--A-N-----P---DI---PE-A--Y-K----L------RG-WF-D-A--EG---
       | |         ||      |    |            |  | |    ||   
RHTALQAAINKTVKGDNLVDISKVADAAGKKGKVDAGIVKASASKGDEFSDFSFKEGNTA
---------Q---
         |   
TLKIADIFVQEKG
1jmc 1ph1  127  238  673  53.36  18.87
-K-V------V-P-----I---AS-LT--PYQSKW---T----I--CARV-TN--K--S-
   |      | |         ||  |   |   |            ||   |       
VQLVESGGGLVQPKGSLKLSCAASGFTFNTYAMNWVRQAPGKGLEWVARIRNNYATYYAD
QIR-TWSNSRGEGK-LFSLEL-VDESG--E-I--R-A-TAF-NE----QVD--K-----F
        ||        |               | |  |         |   |      
SVKDRFTISRDDSQSMLYLQMKTEDTAMYYCVRHRGAPLAYWGQGTLVTVSAAKTTPPSV
FPL---I-E-----VNK---VY-YFSKG-TL-----KIANK-Q-FTA-VKND-YEM----
 ||           |     |  ||    |              | |      | |    
YPLAPGCGDTTGSSVTSGCLVKGYFPESVTVTWNSGSLSSSVHTFPALLQSGLYTMSSSV
TF--N---NE--T-SVM-PCED---DHHL-PTVQF-DFT-GID-DLENKSKDSL-V--DI
|        |  | ||  |      |  | |  |    |      |      |     ||
TVPSSTWPSETVTCSVAHPASSTTVDKKLEPDIQMTQSTSSLSASLGDRVTISCRASQDI
IGICKSY-E--DAT-K--I--T--VRSN--NR-EVAKRNI-Y-L-M-DTSGK-VVT----
      |    | | |  |  |   ||    |         | |           |    
SNYLNWYQQKPDGTVKVLIYYTSRLRSGVPSRFSGSGSGTDYSLTISNLEQEDIATYFCQ
-A-TL-W----G---E----D-A-D-K-F----D-----G-S-----RQ--P--V-L--A
   || |    |   |    | |     |          | |         |        
QGNTLPWTFGGGTKLEIKRADAAPTVSIFPPSSEQLTSGGASVVCFLNNFYPKDINVKWK
IKGA-R---V-SDFGGR-SL-SVLS-SSTI-IA-NP-D----IP-EA-YKL-RG----WF
| |  |   |        |  |  | |||                ||  |         |
IDGSERQNGVLNSWTDQDSKDSTYSMSSTLTLTKDEYERHNSYTCEATHKTSTSPIVKSF
DAEGQ
     
NRNEC
1jmc 4z8f   82  238  425  34.45  19.29
---------------------------------------------K-----V-V-----P
                                             |       |     |
HEFIPSNTDYPGPHHFEVTFQQSSTAKSATWTYSPLLKKLYCQIAKTCPIQIKVSTPPPP
---I-----------------------------------A--------------------
   |                                   |                    
GTAIRAMPVYKKAEHVTDVVKRCPNHELGRDFNEGQSAPASHLIRVEGNNLSQYVDDPVT
-----------------------------S----------L---T---------------
                             |          |   |               
GRQSVVVPYEPPQVGTEFTTILYNFMCNSSCVGGMNRRPILIIITLEMRDGQVLGRRSFE
-------------------------P----Y-----------Q-S--K---WT-------
                         |    |           | |  |   ||       
GRICACPGRDRKADEDHYREQHEFIPSNTDYPGPHHFEVTFQQSSTAKSATWTYSPLLKK
----I---C--------------A-R----------VT-------N----K--S--Q---
    |   |              | |          ||       |          |   
LYCQIAKTCPIQIKVSTPPPPGTAIRAMPVYKKAEHVTDVVKRCPNHELGRDFNEGQSAP
----IRT-WSN-SR-------G--------E----G-K----L--F----S---------
    ||    | |        |        |    |      |  |    |         
ASHLIRVEGNNLSQYVDDPVTGRQSVVVPYEPPQVGTEFTTILYNFMCNSSCVGGMNRRP
------LE------L--------V------------D-------E---S-----G----E
      ||      |                     |       |   |     |    |
ILIIITLEMRDGQVLGRRSFEGRICACPGRDRKADEDHYREQHHEFIPSNTDYPGPHHFE
----------------------------------------------IR-------A---T
                                              ||       |   |
VTFQQSSTAKSATWTYSPLLKKLYCQIAKTCPIQIKVSTPPPPGTAIRAMPVYKKAEHVT
-----------A--FN-------------E-----Q-V-D----K---------------
              ||             |     | | |                    
DVVKRCPNHELGRDFNEGQSAPASHLIRVEGNNLSQYVDDPVTGRQSVVVPYEPPQVGTE
F------F-------------P-L--I--E-----V----------------N-KV----
|      |             | |  |  |     |                  |     
FTTILYNFMCNSSCVGGMNRRPILIIITLEMRDGQVLGRRSFEGRICACPGRDRKADEDH
Y-----------Y---------F-------------S------------------K----
|           |         |             |                  |    
YREQEFIPSNTDYPGPHHFEVTFQQSSTAKSATWTYSPLLKKLYCQIAKTCPIQIKVSTP
---GT-LK---I---A-----------N----KQF----T--A-----VK--N------D
   ||          |           |      |       |     |   |      |
PPPGTAIRAMPVYKKAEHVTDVVKRCPNHELGRDFNEGQSAPASHLIRVEGNNLSQYVDD
-----------YE---M-T-F-----N---NETSV--M---P------------------
           ||     | |     |   |   |  |   |                  
PVTGRQSVVVPYEPPQVGTEFTTILYNFMCNSSCVGGMNRRPILIIITLEMRDGQVLGRR
--------C---E---D-DHH----LP--T---------V---Q----------FD----
        |       | ||      |  |         |   |                
SFEGRICACPGRDRKADEDHYREQFIPSNTDYPGPHHFEVTFQQSSTAKSATWTYSPLLK
--F--------------T----G--I-------------D------------D-------
                 |    |  |             |            |       
KLYCQIAKTCPIQIKVSTPPPPGTAIRAMPVYKKAEHVTDVVKRCPNHELGRDFNEGQSA
----L---E-NK-SK---D------S-----------------L---------V------
    |   | |  |    |      |                 |         |      
PASHLIRVEGNNLSQYVDDPVTGRQSVVVPYEPPQVGTEFTTILYNFMCNSSCVGGMNRR
-----------D--II------G-I--C-----KS----Y-E-------D----------
           |          | |  |     |     | |       |          
PILIIITLEMRDGQVLGRRSFEGRICACPGRDRKADEDHYREQFIPSNTDYPGPHHFEVT
---------A--T------K----I--T----VR-S-----NN--R--------E----V
         |  |      |    |  |       |         |        |    |
FQQSSTAKSATWTYSPLLKKLYCQIAKTCPIQIKVSTPPPPGTAIRAMPVYKKAEHVTDV
AKR--N--I---Y----------L-------M-----D-TSGK----V------V-T--A
 ||  |                 |             |   |     |      | |   
VKRCPNHELGRDFNEGQSAPASHLIRVEGNNLSQYVDDPVTGRQSVVVPYEPPQVGTEFT
T-LW----------G------------E--D--------------A----D-K-------
| |           |            |  |              |    | |       
TILYNFMCNSSCVGGMNRRPILIIITLEMRDGQVLGRRSFEGRICACPGRDRKADEDHYR
---------F-----D--G---------------------S----R---Q-----P----
         |     |  |                     |        |     |    
EQHHHHHHEFIPSNTDYPGPHHFEVTFQQSSTAKSATWTYSPLLKKLYCQIAKTCPIQIK
V------------L-----A------IK-------------G----A----RV-----S-
|                  |       |             |    |    ||     | 
VSTPPPPGTAIRAMPVYKKAEHVTDVVKRCPNHELGRDFNEGQSAPASHLIRVEGNNLSQ
---D---------------------------F-------------------------G--
   |                           |                         |  
YVDDPVTGRQSVVVPYEPPQVGTEFTTILYNFMCNSSCVGGMNRRPILIIITLEMRDGQV
-G-RS--------------------------L-S-----------V-L---S---S----
 | ||                            |           |     |   |    
LGRRSFEGRICACPGRDRKADEDHYREQHEFIPSNTDYPGPHHFEVTFQQSSTAKSATWT
-S------------T--I-I----------A-N--P---------D-I---P--------
 |            |  | |          |    |         |     |        
YSPLLKKLYCQIAKTCPIQIKVSTPPPPGTAIRAMPVYKKAEHVTDVVKRCPNHELGRDF
-E-----A-Y--K-----L----------R------------G-------W-F-------
 |     |          |          |            |         |       
NEGQSAPASHLIRVEGNNLSQYVDDPVTGRQSVVVPYEPPQVGTEFTTILYNFMCNSSCV
-----------------D-------A-E-------G------------Q
                 |         |       |            |
GGMNRRPILIIITLEMRDGQVLGRRSFEGRICACPGRDRKADEDHYREQ
1jmc 3vd0  179  238 1609  75.21  11.12
KVVPIASLTPYQSKWTICARVTNKSQIRTWSNSRGEGKLFSLELVDESGEIRATAFNEQV
                  |   | |   |       |     |   | |  |       |
----LGD---FAAEY---AK-SNRS---T---CK--G---CMEKI-EKGQVR-LS-KKMV
DKFFP-LIEVNKVYYFSKGTLKIANKQFTAVKNDYEMTFNNETSVMPCEDDHHLPTVQFD
|   | |       |   |     |         |        |    ||   |   |  
DPEKPQLGMIDR-WY-HPGCF-VKNREELGFRPEYSASQLKGFSLLATEDKEALKK-Q--
FTGIDDLENKSKDSLVDIIGICKSYEDATKITVRSNNREVAKRNIYLMDTSGKVVTATLW
  |    |   |  | |       |      |         |    |   | | |     
LPGM-KAE---K-TLGD-FA-AE-YAKSNRSTCKGCMEKIEKGQVRL---SKKMVDPEK-
GEDADKFDGSRQPVLAIKGARVSDFGGR-SLSVLSSSTIIANPDIPEAYKLRGWFDAEGQ
       |    |    |      |    | | |      |  |  || |          
PQ-LGMIDRWYHPGCFVKNREELGFRPEYSASQLKGFSLLATED-KEALK-K-QLPGV-K


1jmc 3odc   46  238  192  19.33  23.96
-K---V---V----P--I---A----S---L-T----------P-Y-Q-------S----
 |       |           |    |   | |          | | |       |    
SKLSIISWNVDGLDTLNLADRARGLCSYLALYTPDVVFLQELIPAYVQYLKKRAVSYLFF
K-----W-T-ICARVTN-K---SQ-I---RT--WSN---SR-G-EG-KLF---S-LE-LV
        | |  |    |   |  |    |    |         | ||    | ||   
EGSDDGYFTGIMLRKSRVKFLESEIICFPTTQMMRNLLIAQVTFSGQKLYLMTSHLESCK
DESGE----IR--------A--TA---F----N--E-QVDKF--FP--L--I-E-VNK-V
  | |     |        |   |   |    |     |      |       |   |  
NQSQERTKQLRVVLQKIKEAPEDAIVIFAGDTNLRDAEVANVGGLPAGVCDVWEQLGKQE
Y--Y-F-SK---G-TLK-IAN-K--Q-F-----TA--VKNDY-E---M-TFN-NE-TS--
   |    |     |            |     ||  |  |      |        ||  
HCRYTWDTKANSNKTVPYVSRCRFDRIFLRSAKTAPPVTPDHMALIGMEKLDCGRYTSDH
-VMPC--------E-DDHHLPTVQFDFTGID--DLENKSKD--S-L-V---D-I-----I
    |        |  |  |        | |   |        | |     |       |
WGIYCTFNTTAKSEVEDSKLSIISWNVDGLDTLNLADRARGLCSYLALYTPDVVFLQELI
-G-I--C-K---SY---E---DA--TKITVR-SN-N--R-E-V----AK--RNIYLMD-T
        |   ||   |   |   | |  | |       |          ||      |
PAYVQYLKKRAVSYLFFEGSDDGYFTGIMLRKSRVKFLESEIICFPTTQMMRNLLIAQVT
-SG-K--VVT---------A---T------LW----G-EDADK-F--DGS-RQPVLA-IK
 || |    |             |      |       |||   |  |   |    |   
FSGQKLYLMTSHLESCKNQSQERTKQLRVVLQKIKEAPEDAIVIFAGDTNLRDAEVANVG
G--ARVSD-F---G---G-R----S-L-S---V--LS--S-STI-I--A-N-PDI-PE--
|  | | |     |     |        |   |   |      |    |   |   |   
GLPAGVCDVWEQLGKQEHCRYTWDTKANSNKTVPYVSRCRFDRIFLRSAKTAPPVTPDHM
A---Y-KL---R--G--W--FDAEGQ
|     ||   |     |        
ALIGMEKLDCGRYTSDHWGIYCTFNT
1jmc 4fpv  101  238  506  42.44  19.96
KVVPIASLTPYQSKWTICARVTNKSQIRTWSNSRGEGKLFSLELVDESGEIRATAFNEQV
   |    |   |   |         |    |   | |     ||     |   || |  
R--P--KVT--KS--DIVDQIA-LN-IKN-NNLKLE-KKY-IRLV-----I--DAFFEEL
DKFFPLIEVNKVYYF-SKGTLKI-ANK-QFTAVKNDYEMTFNNETSVMPCEDDHHLPTVQ
 |   |   | |  | | ||      |    |  |    |      |     |||     
-K-SNLCS-NNVIEFRSFGTFEVRKRKGRLNA-RNP-Q-T-GEYVKVL----DHHV--AY
FDFTGIDDLENKSKDSLVDIIGICKS-YEDATKITVRSNNREVAKRNIYL-MDTSGKVVT
|   |  ||               ||   |        ||    |  | |  |       
FR-PG-KDLKERVW-G-IKRPKVTKSDIVDQIALNIKNNNLKLEKKYIRLVIDAFFEELK
ATLWGEDADKF-D-GSRQPVLAIKG-ARV-SDFGGRSLSVLSSSTIIANPDIPEAYKLRG
  |       |   |    |   ||         |    ||        |      | | 
SNLCSNNVIEFRSFGTFE-VRKRKGRLNARNPQTGEYVKVLDHHVAYFRPG-KD-LKERV
WFDAEGQ
|      
W-GI--K
1jmc 2np2   56  238  204  23.53  27.45
KVVPIASLTPY-Q-SKWTICARVTN-KSQIRTWSNSRGEGKL-FSLELV----DESG--E
         || |       ||      |       |   |            |  |   
HPRYQQPPVPYRQIDDCPAKARPQHIFYQQFLGKDGRRDPKCQWEFAVIFWGNDPYGLKK
I-RATAF-N-E--QVDKF-FPLIEVNKV-Y--Y-FSKGTLKIANK-QFTAVK-N-DYEMT
   |  |       |     |        |  |           | |             
LSQAFQFGGVKAGPVSCLPHPGPDQSPITYCVYVYCQNA-ATSKKVQMARLEWEASHPLA
FNNETSVMPCEDDHHL---PTV-Q--FDFTGIDDLENKSK-DSL-V-DIIG-ICKSYEDA
 |   |     |   |   |   |       |||   |            |         
GNLQSSIVSFDDPLPLTPHPRYQQPPVPYRQIDDCPAKARPQHIFYQQFLGKDGRRDPKC
T-KITVRS-NNREVA-KRNIYLMDTSG-KV-VTATLWGEDADKFDGSRQPVLAIKGARVS
     |    |     |         | |      |     |              |  |
QWEFAVIFWGNDPYGLKKLSQAFQFGGVKAGPVSCLPHPGPDQSPITYCVYVYCQNAATS
DFGGRSLSVLSSSTIIANPDIPEAYKLRGWFD-AEGQ
            |   |              |     
KKVQMARLEWEASHPLAG-NL-QS-SIVSFDDPLPLT
1jmc 4uzb   41  238  273  17.23  15.02
---------------------------KV--------------V-----P----------
                           ||              |     |          
EKPTPLINSSMLGQYVGQTVRIVGKVHKVTGNTLLMQTSDLGNVEIAMTPDSDVSSSTFV
------------------------------------I--A-----S---L---T------
                                    |  |     |   |   |      
EVTGKVSDAGSSFQANQIREFTTVDVDLTLVENVVQISAAFPNLFSDNTLRPVTIRQILN
-----P-------------------------------Y-------Q-S-K-W---T-I--
     |                               |       |     |     |  
AEQPHPDAEFILDGAELGQLTFVAVVRNISRNATNVAYSVEDGTGQIEVRQWLDASEIRN
-C-ARV--T---------------------N-----------------K-------S--Q
    ||  |                     |                         |  |
NVYVRVLGTLKSFQNRRSISSGHMRPVIDYNEVMFHRLEAVHAHLQVTRIYPIEGLSPYQ
----I--R-T-------WSNSRGEGKLFSLELVDESGEIRATAFNEQVDKFFPLI-E---
    |  | |       ||| ||||||||  | | |||| || ||  || | ||  |   
NRWTIKARVTSKSDIRHWSNQRGEGKLFSVNLLDDSGEIKATGFNDAVDRFYPLLQENHV
-------VN---K----V---Y-----------------------Y-F-------S----
       ||   |        |                       | |       |    
YLISKARVNIAKKQFSNLQNEYEITFENSTEIEECTDATDVPEVKYEFVRINELESVEAN
-K----G---T---L-KI---A----------------N---------K--Q-F-T----
      |       |  |   |                |         |    | |    
QQCDVIGILDSYGELSEIVSKASQRPVQKRELTLVDQGNRSVKLTLWGKTAETFPTNAGV
------A---VK-------------------N-D----------Y--E-M-T-F----N-
      |   ||                   | |          |        |    | 
DEKPVLAFKGVKVGDFGGRSLSMFSSSTMLINPDITESHVLRGWYDNDGAHAQFQPYTNG
-----N--E--T--SV------M---P---------------------------------
     |  |  |   |      |   |                                 
GGAGANMAERRTIVQVKDENLGMSEKPDYFNVRATVVYIKQENLYYTACASEGCNKKVNL
----------C-------E----------D------------D------------H----
          |       |          |            |            |    
DHENNWRCEKCDRSYATPEYRYILSTNVADATGQMWLSGFNEDATQLIGMSAGELHKLRE
----------H------------------------------------------L------
          |                                          |      
ESESEFSAALHRAANRMYMFNCRAKMDTFNDTARVRYTISRAAPVDFAKAGMELVDAIRA
-----PT--V------QF-------------------------------------D----
     ||         |                                      |    
YMMEKPTPLINSSMLGQYVGQTVRIVGKVHKVTGNTLLMQTSDLGNVEIAMTPDSDVSSS
-F---T------G-------I------D-D--L-EN--K-S-------KD-SL--V----
 |   |      |       |      | |  | ||    |        |  |  |    
TFVEVTGKVSDAGSSFQANQIREFTTVDVDLTLVENVVQISAAFPNLFSDNTLRPVTIRQ
---------D---I-----IG----IC--K--S-------Y--EDAT-----K-------
         |   |      |           |       |  || |             
ILNAEQPHPDAEFILDGAELGQLTFVAVVRNISRNATNVAYSVEDGTGQIEVRQWLDASE
I---T-VR------S--N---------------N-----R-E-------V----------
|     ||      |  |               |     | |       |          
IRNNVYVRVLGTLKSFQNRRSISSGHMRPVIDYNEVMFHRLEAVHAHLQVTRIYPIEGLS
---------A----K---R---N------IY---LMDTSG--K-------V---------
         |    |   |   |           | | ||  |       |         
PYQNRWTIKARVTSKSDIRHWSNQRGEGKLFSVNLLDDSGEIKATGFNDAVDRFYPLLQE
--V---T------A----T-L---W------G----E--DA-D----K--F---------
  |          |      |               |  || |    |  |         
NHVYLISKARVNIAKKQFSNLQNEYEITFENSTEIEECTDATDVPEVKYEFVRINELESV
------------D--G------SR--Q-PV------L------AIK----G---------
            |  |      |   | ||      |        |    |         
EANQQCDVIGILDSYGELSEIVSKASQRPVQKRELTLVDQGNRSVKLTLWGKTAETFPTN
A----R-V-S-------DFGGRSLSVLSSST--I---I--A--------N--------P-
|      |         ||||||||  ||||  |   |           |        | 
AGVDEKPVLAFKGVKVGDFGGRSLSMFSSSTMLINPDITESHVLRGWYDNDGAHAQFQPY
--------------------D--I-----PE-----A-----------Y----------K
                    |        |      |           |          |
TNGGGAGANMAERRTIVQVKDENLGMSEKPDYFNVRATVVYIKQENLYYTACASEGCNKK
--L--------------------R-----------G--W---F--D--------A-----
  |                    |           |  |   |  |        |     
VNLDHENNWRCEKCDRSYATPEYRYILSTNVADATGQMWLSGFNEDATQLIGMSAGELHK
-------E---------------------------------------------G-Q----
       |                                             |      
LREESESEFSAALHRAANRMYMFNCRAKMDTFNDTARVRYTISRAAPVDFAKAGMELVDA
-----
     
IRAYM
1jmc 4gnx  180  238 1325  75.63  13.58
KV-----V--P---------I-A----S--------L-TP--Y-QS---K----------
|      |  |                |           |     |   |          
KIRTFGWVQNPGKFENLKRVVQVFDRNSKVHNEVKNIKIPTLVKESKIQKELVAIMNQHD
----W-------T-I-----C-A--RVT-----N-KSQIRTW-SNS--R-----G--E--
            | |     | |    |     | |  |  | |    |     |  |  
LIYTYKELVGTGTSIRSEAPCDAIIQATIADQGNKKGYIDNWSSDGFLRWAHALGFIEYI
GK--LFSL-E--LV-DES--G-----E--IRA--T---A---FN--E--Q-V---D--K-
 |   |      |    |  |     |  | |      |       |  |     |  | 
NKSDSFVITDVGLAYSKSADGSAIEKEILIEAISSYPPAIRILTLLEDGQHLTKFDLGKN
--F-----F---P---LIE-V-N-----K--V---Y------Y------F-SK-GTL---
  |     |   |   |     |     |             |         | |     
LGFSGESGFTSLPEGILLDTLANAMPKDKGEIRNNWEGSSDKYARMIGGWLDKLGLVKQG
-K---I-A--NKQ-----F--T---------A---V-KNDY-EM--T-F-NNE---T--S
 |   |    ||      |  |         |   | |  | ||  |     |   |   
KKEFIIPTPDNKEFISHAFKITGEGLKVLRRAKGSVPKRVYWEMLATNLTDKEYVRTRRA
----VM-PC-----E---D-------DHHLPTVQFD----F-TGI-DDLENK--S-KDSL
              |   |       |    |   |      |||           ||  
LILEILIKAGSLKIEQIQDNLKKLGFDEVIETIENDIKGLINTGIFIEIKGRFYQLKDHI
VD-II---GI----CKS-YED--A-----TK---------ITV-R-S-NNR--E--VAK-
    |   |      ||  |          |         |   | |   |  |  |   
LQFVIPNRGVTKQLVKSELEEKKSELRHKLKYVPHEYIELIEIARNSTQDRILEMKVMEF
-RNI--Y----L----M-D----T--S----GKVV-T-A-T----L-WGE-D-ADKF--D
      |    |      |    |  |    |  | | |      |  |  |        
FMKVYGYRGKHLGGSRKPDGAIYTVGSPIDYGVIVDTKAYSGGYNLPIGQADEMQRYVEE
G-SR-Q---P-----VL--AI---KGARVS-DF-GG-RS-LS-V--LSS-S-TIIANPD-
   |     |     |        |   ||  | |     |                   
NQTRNKHINPNEWWKVYPSSVTEFKFLFVSGHFKGNYKAQLTRLNHITNCNGAVLSVEEL
-I-PEAYK-----L---RGWF-DAE-GQ
 |  |  |     |   |  |   |   
LIGGEMIKAGTLTLEEVRRKFNNGEINF
1jmc 1fok  107  238  568  44.96  18.84
K-V-V-PIASLTP----YQ--S-KWTI-CARVTN--K-SQIRTWSN-SRGEGKLFSLELV
          | |    ||    |  |      |  |  |           |       |
SHPDLNKLLELWPHIQEYQDLALKHGINDIFQDNGGKLLQVLLITGLTVLPGREGN-DAV
DESG-EIRATAFNEQVDK-F-----F-P-LI-EVNKV-YYFS--KGTLKIANKQFTAVKN
|  | |      |    | |       |  |     |   |    |   |          
DNAGQEYELKSINIDLTKGFSTHHHMNPVIIAKYRQVPWIFAIYRG-IAI-EAIYRLEPK
DYEMTFNN-ETS-VMP-CED-DH-HLPTVQFDFT-GIDDLENKSKDSLVDIIGICKSYED
| |      |         |      | |      |           |         | |
DLEFYYDKWERKWYSDGHKDINNPKIP-VKYVMEHGTKIYSHPDLNKLLELWPHIQEYQD
-ATK--IT-V-RSN-NR--EVAK-RNI-YL-----MDTSG-----K-V-VTATL-WG--E
 | |  |      |      |        |      |  |     |      |       
LALKHGINDIFQDNGGKLLQVLLITGLTVLPGNDAVDNAGQEYELKSINIDLTKGFSTHH
DADK-FDGS-RQ-P-VLAI-KG----A--RV--SD--F-GGR-SLSVLSSS-TIIANPDI
          || |   ||  |    |  |    |  |          |     | || |
HMNPVIIAKYRQVPWIFAIYRGIAIEAIYRLEPKDLEFYYDKWERKWYSDGHKDINNPKI
PEAYKLRGWFDAEGQ
|  |           
PVKYVME--HGTKIY
1jmc 1eyu   60  238  309  25.21  19.42
KV--V-P-IASL-TPYQS-KWTICARVTNKSQIRTWSNSRG-E--GKLFS--LE-L--V-
 |    | |  |            ||        |       |  |      || |    
VVAGIDPGITHLGLGVVAVEGALKARLLHGEVVKTSPQEPAKERVGRIHARVLEVLHRFR
DESGEIRATAF---NEQVDK--F-F-P-LI---EVN-KVY-Y--FS-KGTL-K--IA-N-
 |        |   ||   |        |    |    || |     |  | |   |   
PEAVAVQEQFFYRQNELAYKVGWALGAVLVAAFEAGVPVYAYGPMQVKQALAKEEVALMV
KQFTAVKNDYEMT-FNNETSVMPCEDDH-HLPTVQ-FDF--TGID-DLENKSKD--S-L-
      |                         |         |||             | 
RGILGLKEAPRPSHLADALAIALTHAFYARMGTAKPLHMVVAGIDPGITHLGLGVVAVLK
VDII-G-ICK-SYEDATKITV-RSNNR--EVA-K-R-N-IYLMDT-SGKV-VTA-TL-W-
     |   | |     |  | |   |  ||    |                 |    | 
ARLLHGEVVKTSPQEPAKERVGRIHARVLEVLHRFRPEAVAVQEQFFYRQNELAYKVGWA
-GED-ADKFDGSRQPVLAIKGARVSD-FGGR-SLSVLSSSTI-I--A-NPD-IPE--AYK
 |      |     || |     |                      |  |       |  
LGAVLVAAFEAG-VPVYAYGPMQVKQALAAKEEVALMVRGILGLKEAPRPSHLADALAIA
LRGWFDAE-G--Q--
|   | |  |     
LTHAFYARMGTAKPL
1jmc 4ld0   57  238  314  23.95  18.15
KVVPIASLTPYQSKWTICARVTNKSQIRTWSNSRGEGKLFSLELVDESGEIRATAFNEQV
                         | |   | |     | | |        | || |  
-TIK-DKVRAMR-ELLLSDEYA-E-QKRA-VN-R-----FML-LLSTLYSLDAQAFAEAT
DKFFPLIEVNKVYYFS-KGT-LKIANK-QFTAVK-NDYEMTFNNETSVMPCE-DDHHLPT
           ||      | ||  |      |    |    |  |    |    |    
ESLHG--R-TRVYFAADEQTLLKNGNQTKPKHVPGTPYWVITNTNTG-RKCSMIEHIMQS
VQFDFTGIDDL-ENKS-KDSLVDIIGICKSYEDATKITVRSNNR-EVAKRNIYLMDTSG-
 ||    |         ||          | | |     |  ||        |  |    
MQFPAELIEKVCGTITIKDKVRAMRELLLSDEYAEQ-K-RAVNRFMLLLSTLYSLDAQAF
KVVTATLWGEDADKFDGSRQPVLAIKG--ARVSDFGGRSLSVL-SSST-IIANP-D-IPE
   |  | |     |    |  |   |         |    |     |         |  
AEATESLHGRTRVYFAADEQTLLK-NGNQTKPKHVPGTPYWVITNTNTGRKCSMIEHIMQ
AYKLRG-WFDAE-GQ-
             |  
SMQFPAELIEKVCGTI
1jmc 1lrr   48  238  236  20.17  20.34
KVVPIASLTPYQSKW-TICARVTNKSQIRTWSN-SRGEGKLFSL--ELVDESGEIRATAF
   | | | |    |                    | | |         |     | |  
PIIP-ANL-P-ED-WQEALLPEFSAPYFHELTDFLRQERKEYTIYPPAPDVFNALRYTPL
NE-QVDKF--FPLIEVNKVYYFSKGTLKIANKQFTAVKNDY-EMTFNNETSVMPCEDDH-
 |  |      |    |     |               | | | |      | |    | 
GEVKVLILGQDPYHGPNQAHGLS-FSVRPGVRVPPSLRNIYKELTEDIPGFVAP-K--HG
HLPT-VQFDFTGIDD-LENKSKDSLVDIIGICKSYEDATKITVRSNNREVAKRNIYLM-D
 |              |            |  |  |  |       |     |       
YLRSWAEQGVLLLNAVLTVRAAQA-NSHQG--KGWEHFTDAVIKAVNAK-EERVVFILWG
TSGKVVTATLWGEDADKFDGSRQPVLAIKGARVSDFGGRSLSVLSSSTIIANPDIPEAYK
           |        |  |           || |  |        |    |    
SYARKKKKLITGKNHVVIE-SGHP-SPL-SEQYF-FGTRPFSKTNEALEKAGRG-PVEWQ
LRGWFDAEGQ
|     |   
L----PAT-V
1jmc 4uqm   42  238  228  17.65  18.42
KVVPIASLTPYQSKWTICARVTNKSQIRTWSNSRGEGKLFSLELVDESGEIRATAFNEQV
     |     | |   | |       |      |       |    |    | |  | |
RTLQ-A-I-GRQLKAMGCERF-DIG-VRD-ATT-GQ--MMNREW---S----A-A--E-V
DKFFPLIEVNKVYYFSKGTLKIANKQFTAVKND-YEMTFNNETSVMPCEDDHHLPTVQFD
     |   |      |      | |     || |      |       ||  |    ||
-----L-Q-N-TPWL-K---RM-NAQ--G--NDVYIRPAEQERHGLVLVDD--L-S-EFD
FTGIDDLENKSKD-SLVDIIGICKSYEDATKITVRSNNREVAKRNIYLMDTSGKVVTATL
    ||         ||      | |    |        |   |      |      |  
---LDDMKAEGREPALV-VETSPKNYQAWVKVADAAGG-EL--RG-QIARTLASEYDADP
WGEDADKFDGSRQPVLAIKGARVSDFGGRSLSVLSSSTIIANPD-IPEA-YKLRGWFDAE
   |     | |         |        |      |  | |     |           
ASADSRHY-G-R--LAGFTN-RKDKQPWVLLRESKGKTATAGPALVQQAGQQIE-QAQRQ
GQ
  
QE
1jmc 3h25   47  238  187  19.75  25.13
KVVPIASLTPYQSKWTICARVTNKSQIRTWSNSRGEGKLFSLELVDESGEIRATAFNEQV
          |  |    | |     |         ||  |       ||| |      |
R-MD--EF--Y-TK-VYDA-V---CEI-PY------GKV-S---T--YGEI-A-RY---V
DKFFPLIEVNKVYYFSKGTLKIANKQFTAVKNDYEMTFNNETSVMPCEDDHHLPTVQFDF
    |        |           |  | |         || | |    |    |    
G--MP----S---Y-AR---QV-G-Q--AMK--H-L--HPETHV-PW---HR---V----
TGIDDLENKSKDSLVDIIGICKSYEDATKITVRSNNREVAKRNIYLMDTSGKVVTATLWG
  |    | |        |        | |   |      ||     |       |   |
--I----N-SR-------G--------T-I---S------KR-----D-----ISA---G
EDADKFDGSRQPVLAIKGARVSDFGGRSLSVLSSSTIIANPDIPEAYKLRGWFDAEGQ
|   | |  |   |   |           | |       |   || |    |      
EQRQK-D--R---LEEEGVEI--Y--QT-S-LGEYK-L-N--LPE-Y-M--W---K-P
1jmc 3gx4   49  238  107  20.59  45.79
----KV-V--P--IAS---LTP-YQS-K-----W--TI--CARV-TNKS-Q-I-R--TW-
    |          |    |      |     |       | |    |           
ATVFKLGLFKSLFLCSFHDITRLFKNDKTTNQQWVLAVFGLAEVFFEASFELLKKQCSFL
S-NSRG-EGKLFSLELV--D--ESGE-IR---ATAFN--EQVDKFF-PLIE-VN-KVYYF
    |  ||      |       | |  |   |   |  |       | |         |
QMQKRSHEGGTCAVYLICFNTAKSRETVRNLMANMLNVREECLMLQPPKIRGLSAALFWF
--S-K-GTLKI-ANKQF-TA-VK-NDYEMT-FN-N-ETSVMPCE-DD-HHL----PTV--
  |    |||  |      |    |    | |      |   |   |   |     |   
KSSLSPATLKHGALPEWIRAQTTLNGSRATVFKLGLFKSLFLCSFHDITRLFKNDKTTNQ
QFDF-T-GIDDL--E-N-K--SKD-S-L-VD--I-I-GICKSY----EDA-TKITVR---
|      |      |       |  | |         | |  |      |    |||   
QWVLAVFGLAEVFFEASFELLKKQCSFLQMQKRSHEGGTCAVYLICFNTAKSRETVRNLM
SN--N-R-E---V--AK-R--N--I--Y---LMD-T-S-G---K-V---VT--ATLW--G
 |  | | |       | |            |   |   |          |  ||    |
ANMLNVREECLMLQPPKIRGLSAALFWFKSSLSPATLKHGALPEWIRAQTTLNATVFKLG
--ED----A--D--K-F--D-GSRQP-VLAIKG-ARV----S-D-------F--------
           |    |  |    |  |||  | | |    |         |        
LFKSLFLCSFHDITRLFKNDKTTNQQWVLAVFGLAEVFFEASFELLKKQCSFLQMQKRSH
-GGR-S--L---SVLSS-STI--I-ANP-DI-PEA---Y--KLRG------WF----D-A
 ||     |       |  |     ||      |       | ||      ||      |
EGGTCAVYLICFNTAKSRETVRNLMANMLNVREECLMLQPPKIRGLSAALFWFKSSLSPA
--E-G--------Q----
    |        |    
TLKHGALPEWIRAQTTLN
1jmc 1ksy   89  238  438  37.39  20.32
----K-------------V------------------------------V----------
    |             |                              |          
VEDPKDFPSELLSFLSHAVFSNRTLACFAIYTTKEKAALLYKKIMEKYSVTFISRHNSYN
--------P-------I---A---------------------S-LT--PY----QS----
        |       |   |                     | ||  |      |    
HNILFFLTPHRHRVSAINNYAQKLCTFSFLICKGVNKEYLMYSALTRDPFSVIEESLPGG
--------------K---W---------T----I-------------------C------
              |   |         |                        |      
LKEHDFNPEEAEETKQVSWKLVTEYAMETKCDDVLLLLGMYLEFQYSFEMCLKCIKKEQP
----------------A-----R------V-T---NK---S------Q---------I-R
                |            | |    |   |      |           |
SHYKYHEKHYANAAIFADSKNQKTICQQAVDTVLAKKRVDSLQLTREQMLTNRFNDLLDR
-------T-------------W---------S-----------N---SR----------G
       |             |         |           |    |          |
MDIMFGSTGSADIEEWMAGVAWLHCLLPKMDSVVYDFLKCMVYNIPKKRYWLFKGPIDSG
---------E---GK----------L-FSL-----E-L-V--D------E-----SGE-I
         |   ||          | | |       | |  |      |     ||  |
KTTLAAALLELCGGKALNVNLPLDRLNFELGVAIDQFLVVFEDVKGTGGESRDLPSGQGI
------R-----A-------------T-AF-------NE-------Q---V--------D
      |                   |  |       ||       |   |        |
NNLDNLRDYLDGSVKVNLEKKHLNKRTQIFPPGIVTMNEYSVPKTLQARFVKQIDFRPKD
--K-------F-------------------F-P------------------------L--
  |       |                     |                        |  
YLKHCLERSEFLLEKRIIQSGIALLLMLIWYRPVAEFAQSIQSRIVEWKERLDKEFSLSV
-----------I--------------E--------V--N---------------------
           |              |        |  |                     
YQKMKFNVAMGIGVLDKVEDPKDFPSELLSFLSHAVFSNRTLACFAIYTTKEKAALLYKK
---K--V--------Y--------------------Y------FS----KG---------
   |  |        |                    |      ||    ||         
IMEKYSVTFISRHNSYNHNILFFLTPHRHRVSAINNYAQKLCTFSFLICKGVNKEYLMYS
--T--------------L------------------K-I---A-----------------
  |              |                  |     |                 
ALTRDPFSVIEESLPGGLKEHDFNPEEAEETKQVSWKLVTEYAMETKCDDVLLLLGMYLE
---N---------K-Q----------------F-------T----A---V---KN-D---
             | |                |       |    |   |   |  |   
FQYSFEMCLKCIKKEQPSHYKYHEKHYANAAIFADSKNQKTICQQAVDTVLAKKRVDSLQ
Y--E-M-T--FN---N--E-----T-S--V---M---P---C---E-D----D------H
   | | |  ||            | |      |       |     |    |       
LTREQMLTNRFNDLLDRMDIMFGSTGSADIEEWMAGVAWLHCLLPKMDSVVYDFLKCMVY
------H-L---P------T---------------V-----Q--F------D-----F--
        |   |      |               |        |      |     |  
NIPKKRYWLFKGPIDSGKTTLAAALLELCGGKALNVNLPLDRLNFELGVAIDQFLVVFED
---T-----------GI-------D--D------LE----NK---------------S--
   |           ||       |  |      ||    ||               |  
VKGTGGESRDLPSGQGINNLDNLRDYLDGSVKVNLEKKHLNKRTQIFPPGIVTMNEYSVP
---------------KD--------S--LVD--II--G-------I--------C-----
               ||        |  |    ||  |       |              
KTLQARFVKQIDFRPKDYLKHCLERSEFLLEKRIIQSGIALLLMLIWYRPVAEFAQSIQS
----------K----S-Y-----------------E---D--------------------
          |    | |                 |   |                    
RIVEWKERLDKEFSLSVYQKMKFNVAMGIGVLDKVEDPKDFPSELLSFLSHAVFSNRTLA
--A---T---------KI------T-V-R--S-N-N--------R-EV------A-K---
  |   |         ||      |   |  | | |        |  |      | |   
CFAIYTTKEKAALLYKKIMEKYSVTFISRHNSYNHNILFFLTPHRHRVSAINNYAQKLCT
------R--N---I-Y--------------L---M---D--------T---S--------
         |     |              |       |        |   |        
FSFLICKGVNKEYLMYSALTRDPFSVIEESLPGGLKEHDFNPEEAEETKQVSWKLVTEYA
------------G-------------------------------------------K-V-
            |                                           |   
METKCDDVLLLLGMYLEFQYSFEMCLKCIKKEQPSHYKYHEKHYANAAIFADSKNQKTIC
---V-T--A--------------------------------T------------------
   | |  |                                |                  
QQAVDTVLAKKRVDSLQLTREQMLTNRFNDLLDRMDIMFGSTGSADIEEWMAGVAWLHCL
-----------L------------W--------G---------E-------------D--
           |            |        |         |             |  
LPKMDSVVYDFLKCMVYNIPKKRYWLFKGPIDSGKTTLAAALLELCGGKALNVNLPLDRL
------A---------D-K-----------------------F-DGS------------R
      |         | |                         |||            |
NFELGVAIDQFLVVFEDVKGTGGESRDLPSGQGINNLDNLRDYLDGSVKVNLEKKHLNKR
-Q---P---------V---L-A-----I--------------------K-----G-A---
 |   |         |   | |     |                    |     | |   
TQIFPPGIVTMNEYSVPKTLQARFVKQIDFRPKDYLKHCLERSEFLLEKRIIQSGIALLL
-----R-V--------S---------D------------F----G-G--------R----
     | |        |         |            |    | |             
MLIWYRPVAEFAQSIQSRIVEWKERLDKEFSLSVYQKMKFNVAMGIGVLDKVEDPKDFPS
---S-LS--V--------------------L--------S----S---S---------T-
   | ||  |                    |        |    |   |         | 
ELLSFLSHAVFSNRTLACFAIYTTKEKAALLYKKIMEKYSVTFISRHNSYNHNILFFLTP
-------I-------------I------------A----------------------NP-
       |             |            |                      || 
HRHRVSAINNYAQKLCTFSFLICKGVNKEYLMYSALTRDPFSVIEESLPGGLKEHDFNPE
-----------------------D---------------------I----P------E--
                       |                     |    |      |  
EAEETKQVSWKLVTEYAMETKCDDVLLLLGMYLEFQYSFEMCLKCIKKEQPSHYKYHEKH
----A-Y--------------------K--------------------L-R---------
    |                      |                    | |         
YANAAIFADSKNQKTICQQAVDTVLAKKRVDSLQLTREQMLTNRFNDLLDRMDIMFGSTG
---------G-------------------------------W------------------
         |                               |                  
SADIEEWMAGVAWLHCLLPKMDSVVYDFLKCMVYNIPKKRYWLFKGPIDSGKTTLAAALL
-------------------------------F----------------------------
                               |                            
ELCGGKALNVNLPLDRLNFELGVAIDQFLVVFEDVKGTGGESRDLPSGQGINNLDNLRDY
-D------------------------------------A---------------------
 |                                    |                     
LDGSVKVNLEKKHLNKRTQIFPPGIVTMNEYSVPKTLQARFVKQIDFRPKDYLKHCLERS
----E------G----------------------------------------Q-------
    |      |                                        |       
EFLLEKRIIQSGIALLLMLIWYRPVAEFAQSIQSRIVEWKERLDKEFSLSVYQKMKFNVA
-------
       
MGIGVLD
1jmc 4gdf  201  238 1987  84.45  10.12
--------KV---V------P------IASL-----T---PY--Q--S--K----W-TI-
             |      |      || |     |   ||  |  |         |  
TTFAARLNRLFDTVYPPGRGPHTSAEVIAALKAEGITMSAPYLSQLRSGNRTNPSGATMA
C-A---RV-----T-NK--SQI-R--TW-SNSRGEG--KL------F-S-L-E--L--VD
  |   |      |             |    |  |            |      |   |
ALANFFRIKAAYFTDDEYYEKLDKELQWLCTMRDDGVRRIAQRAHGLPSAAQQKVLDRID
E--SGE-IRA-TAFNEQVDK-F---F-P-L-IEVN-KVY-YF-SKG-T-----L-KI-A-
|    | | | | |       |     |         |       | |     |      
ELRRAEGIDASTTFAARLNRLFDTVYPPGRGPHTSAEVIAALKAEGITMSAPYLSQLRSG
NK---Q-FT--AVKNDYEM--T-F-NNE--TSV---MP--C--EDD-------H-H-LPT
|       |  |  |        |   |            |   ||         | || 
NRTNPSGATMAALANFFRIKAAYFTDDEYYEKLDKELQWLCTMRDDGVRRIAQRAHGLPS
-VQFD-FTGIDDL---E--N---KSK-DSLVD-II----GICKSYE--DATK---IT---
  |      || |   |            | |       |   | |   | |   ||   
AAQQKVLDRIDELRRAEGISTTFAARLNRLFDTVYPPGRGPHTSAEVIAALKAEGITMSA
-----VRSNNR---E---VAK-RN---I---YLMDTS-GKVVTATL-W----GED-----
      || ||        |   |   |   |  |          | |      |     
PYLSQLRSGNRTNPSGATMAALANFFRIKAAYFTDDEYYEKLDKELQWLCTMRDDGVRRI
ADKFDG--S--RQPVL-AI----K--G--------ARVS---D--F--G-G-R-S-----
|    |  |   | ||  |       |        ||     |     | |   |     
AQRAHGLPSAAQQKVLDRIDELRRAEGIDASTTFAARLNRLFDTVYPPGRGPHTSAEVIA
-L-------SV--LS---S------S--TI--IAN-PDI-------PEAY-KL-R--GW-
 |       |   ||   |      |  |    ||   |        | | ||     | 
ALKAEGITMSAPYLSQLRSGNRTNPSGATMAALANFFRIKAAYFTDDEYYEKLDKELQWL
--F--D-----AE---G------Q---------------
     |     |    |      |               
CTMRDDGVRRIAQRAHGLPSAAQQKVLDRIDELRRAEGI
1jmc 3qyx  103  238  519  43.28  19.85
----KVV-----P-----IA----S-L-T-P---YQ-----SK-W----------TICA-
      |     |      |          |           | |          |    
FTHAHIVALSQHPAALATVAVKYQDMIAALPEATHEAIVAVAKQWSGARALEALLTVAGE
-R-----V-TNK-SQI--R---T-------WSNS-RG-------E----------GK---
 |       |     |  |   |       | |   |       |          ||   
LRGPPLQLDTGQLLKIAKRGGVTAVEAVHAWRNALTGAPLNLTPEQVVAIASHDGGKQAL
---------------L-------F-S-------LE-----L-V--D------E------S
               |         |       ||     | |         |      |
ETVQRLLPVLCQAHGLTPQQVVAIASNGGGKQALETVQRLLPVLCQAHGLTPEQVVAIAS
---G----E-------I--RA---T-----AF--N---EQ----VDKFFP-L-----I--
   |    |           |   |     |   |    |    |    | |        
NIGGKQALETVQALLPVLCQAHGLTPQQVVAIASNGGGKQALETVQRLLPVLCQAHGLTP
E--V----N---K-----V---Y-YF--SKG-T----LKIA-N---KQ-F-T--A---V-
|  |    |   |     |           | |      || |   ||   |  |   | 
EQVVAIASNIGGKQALETVQALLPVLCQAHGLTPEQVVAIASNIGGKQALETVQALLPVL
-K-NDY--E--MTF-NN-------ET--SVMP--C-------ED-----DH----H-LPT
        |       |       ||     |  |       |       |      | |
CQAHGLTPEQVVAIASNIGGKQALETVQALLPVLCQAHGLTPEQVVAIASHDGGKQALET
VQ--FD-F--T-GI--DD---L-ENK-SKDSL--VD-IIGI-CKSY----ED----AT--
||          |               |  |  |       |             |   
VQRLLPVLCQAHGLTPEQVVAIASHDGGKQALETVQRLLPVLCQAHGLTPQQVVAIASNG
--K--I-TV-R-------SNN-R-E--V--A-----KR---NI--YL--M-D----T---
  |    || |             |  |  |     |         |         |   
GGKQALETVQRLLPVLCQAHGLTPEQVVAIASNIGGKQALETVQALLPVLCQAHGLTPEQ
-----S---GK-VV-T--A---TL---WG---ED----A--D--K--FDG-SR------Q
     |   ||    |  |    |    |   |     |  |  |       |      |
VVAIASNIGGKQALETVQALLPVLCQAHGLTPEQVVAIASHDGGKQALETVQRLLPVLCQ
-----P--VLAI-K---G--A-----R---V-------S-D----F----GGR-SL-S--
     |  | ||     |  |     |   |                   ||   |    
AHGLTPEQVVAIASHDGGKQALETVQRLLPVLCQAHGLTPEQVVAIASHDGGKQALETVQ
----VL-SS-S-T----I-IA-N--------------P---D---I-PE---AYKLR-GW
    ||      |      || |              |         ||   |     | 
RLLPVLCQAHGLTPQQVVAIASNGGGKQALETVQRLLPVLCQAAGLTPEQVVAIASHDGG
FDA-EG-Q------
  | |  |      
KQALETVQRLLPVL
1jmc 2ypf  117  238  674  49.16  17.36
KVV---PIA-SLT--P---Y-Q--SKW--TICA---RV--TN--------K-S-------
      | | | |  |   |          | |   |    |        | |       
FIYDDRPAAVSSTFNPEKGYMDFITAYGKNINADNVRIFFLNHKKAKDSLKGSPKVEVDL
Q--------I-------R---------T----------W------------S--NSR---
|                |         |          |                |    
QFGTLRVKVVNNHNPRNRDNPVADNAITLHRLSGYLAKWCFDEIDHGQIEEAEVKSKVVI
--GE--G-K--------L-F---S---L---E---L-VD-E----SG-EI---------R
   |  | |        | |       |   |   |  |       |  |         |
PLAEAKGCKWGDGVALYLAFAPGAEMFLKDFEFYPLAIDIQRVVKDGMDITFMRKVLKQR
--A-TA--F--NE----Q-----V----------D---K-F---F------P-LI--E--
    ||      |    |     |              | |   |      |  |     
YGTKTADDWMISEVTAIQSAVKVVAKLPWAKAGFTAAAKNFLAKFNISVTGPDFIYDDRP
--V----N--K-----V--Y-----------YF--------S-KGTLKI-ANKQF-T-AV
  |    |  |        |            |        | ||  |     || |  |
AAVSSTFNPEKGYMDFITAYGKNINADNVRIFFLNHKKAKDSLKGSPKVEVDLQFGTLRV
K--------N-D--Y-E--MT------------F---NN------ET-S--VMP------
|        | |        |            |           |  |  | |      
KVVNNHNPRNRDNPVADNAITLHRLSGYLAKWCFDEIDHGQIEEAEVKSKVVIPLAEAKG
CE--DD-H-HL---PTVQ-F--D--F--TGID------D-LE-----N--K----SK---
|   |     |   |    |  |  |    ||      |           |     |   
CKWGDGVALYLAFAPGAEMFLKDFEFYPLAIDIQRVVKDGMDITFMRKVLKQRYGTKTAD
D---S----L---VDII--------G--------ICK---S-----YED---A---T---
|   |        |           |          |   |     | |   |   |   
DWMISEVTAIQSAVKVVAKLPWAKAGFTAAAKNFLAKFNISVPDFIYDDRPAAVSSTFNP
-K-----ITV--RS-N--N-R-------------------EV--------AK--------
 |     ||      |  | |                   ||         |        
EKGYMDFITAYGKNINADNVRIFFLNHKKAKDSLKGSPKVEVDLQFGTLRVKVVNNHNPR
-R------N-I-------YL----MD-TS-G---------KVV---T-AT-L-W------
 |      | |       ||     |    |         |||     |    |      
NRDNPVADNAITLHRLSGYLAKWCFDEIDHGQIEEAEVKSKVVIPLAEAKGCKWGDGVAL
------G-E----D------A-D-----K------F------D--G---------SR---
      | |    |      | |     |      |         |         |    
YLAFAPGAEMFLKDFEFYPLAIDIQRVVKDGMDITFMRKVLKQRYGTKTADDWMISEVTA
-Q---PVLA-I---K-G---------AR----VS--------D--------F----G---
 |    | |     | |         |     ||        |        |    |   
IQSAVKVVAKLPWAKAGFTAAAKNFLAKFNISVSTGPDFIYDDRPAAVSSTFNPEKGYMD
-----G--------R-----------SL--S----V------L-----------------
     |        |           ||  |    |      |                 
FITAYGKNINADNVRIFFLNHKKAKDSLKGSPKVEVDLQFGTLRVKVVNNHNPRNRDNPV
S-SS-T---------------I----I--A---N----P----------D-I-------P
     |               |    |  |        |          |         |
ADNAITLHRLSGYLAKWCFDEIDHGQIEEAEVKSKVVIPLAEAKGCKWGDGVALYLAFAP
---------E----A--------------Y--K-L--R-G------W-F-D--A-E----
         |    |                 | |  | |      |      |      
GAEMFLKDFEFYPLAIDIQRVVKDGMDITFMRKVLKQRYGTKTADDWMISEVTAIQSAVK
----------G----------Q-----
          |                
VVAKLPWAKAGFTAAAKNFLAKFNISV
1jmc 4j1j  147  238  927  61.76  15.86
-KV-VPIASLT---PYQSKW-T--ICAR-VTNKSQIR-T-WSNS-R-GE--GKLFSL-EL
         |    ||   |      || |             |   ||  |        
ADIGSEFYTLNWQPPYDWSWMLGFLAARAVSSVETVADSYYARSLAVGEYRGVVTAIPDI
VDESGEIRATAFNEQVDKFFPLIEVNKVYYFSKGTLKIAN-K--QFTAVKNDYEM--TFN
      |   |  | |     |               | |       |            
ARHTLHINLSAGLEPVAAEC-LAKMSRLFDLQCNP-QIVNGALGRLGAARPGLRLPGCVD
N-ETSVMPCEDDHHLPTVQFDFTG-IDDLENKSKDSLVDIIGI-C-KSYEDATKITVRSN
  |  |                |     |     |     |          |        
AFEQGVRAILGQCVSVAMAAKLTARVAQLYGERLDDFPEYICFPTPQRLAAADPQALKAL
NREV--AKRNIYLMDTSGK-VVTATLWG--EDADK----FDG-SR-QP-VLAIKG--AR-
      |   | |           |  |  | | |    | |  |      |  |  |  
GMPLKRAEALIHLANAALEGTLPMTIPGDVEQAMKTLQTFPGIGRWTANYFALRGWQAKD
V---SDF-GGRSLSVLSSSTI--IANPDIP-EAYK-LRGWFDAEG-Q---
|    |              |   |    |   |  |  |   || |   
VFLPDDYLIKQRFPGMTPAQIRRYAERWKPWRSYALLHIWY-TEGWQPDE
1jmc 3ogd   51  238  287  21.43  17.77
KVVPIASLTPYQSKWTICARVTNKSQIRTWSNSRGEGKLFSLELVDESGEIRATAFNEQV
  ||    | |     |    |               |   || |  |   |     |  
-IVP----T-YNG-Y-I-HN-T-RDALAVIQQVL-D-K--QLEPV--S-R-R--P-HER-
DKFFPLIEVNKVYYFSKGTLKIANKQFTAVKNDYEMTFNNETSVMPCEDDHHLPTVQFDF
     ||    |  |      |   |    |     |     |  |         |    
ERGV-LIVSGSVFVF------I--EQSSGIKR-W--T-DG-ISWSPSRIQGRF-LV---Y
TGIDDLENKSKDSLVDIIGICKSYEDATKITVRSNNREVAKRNIYLMDTSGKVVTATLWG
 |   |  | |  ||      |     | ||      |        |   ||    |   
-G--ELD-K-K-GLV------K--K--T-ITLTTTTKE-----LH-ME--GKAEKQTI--
EDADKFDGSRQPVLAIKGARVSDFGGRSLSVLSSSTIIANPDIPEAYKLRGW-FDAEGQ
        | |    |      |  |  |   | |       |  |  |  |    |  
H-LISY-YSKQD---I------D-SGK-LQRPSESD-LKHVQISPA--L--WTMVQENS
1jmc 4qtj   52  238  153  21.85  33.99
KVVPIASLTPYQSKWTICARVTNKSQIRTWSNSRGEGKLFSLELVDESGEIRATAFNEQV
|  |   |             |  |  |  |     | |            |   |   |
K-EP-EQLRKL-FIGGLSFETTDES-LR--SHFEQWGTLTDCVVMRDPNTKRSRGFG-FV
DKFFPLIEVNKVYYFSKGTLKIANKQFTAVKNDYEMTFNNETSVMPCEDDHHLPTVQFDF
       |   |          |      |  |          |   ||    |      
-T-YATVE--EV---D-AAMN-A-RPH-KV--DGRVV-EPKRAVSR-EDSQR-PGAH--L
TGIDDLENKSKDSLVDIIGICKSYEDATKITVRSNNREVAKRNIYLMDTSGKVVTATLWG
|       | |   |   || |  || |             |  |     ||        
T-V-----K-K-IFVG--GI-K--ED-TE----EHH--L--RD-Y-FEQYGKIEVIEIM-
EDADKFDGSRQPVLAIKGARVSDFGGRSLSVLSS-STIIA-NPDIPEAYKLRGWFDAEGQ
   |   |      |       |       |     |    |     |        |   
--TDRGSGKKRG-FAF--VTFDDHDSVDKIVIQKYHTVNGHNCEVRKALS-KQEM-ASAS


1jmc 1pgz   44  238  183  18.49  24.04
----------K-VVP-I---ASLTPY---------Q----SK--W-T--I-C-A----R-
          |           |            |    |        |   |    | 
EAKFEEASLFKRIIDGFKDCVQLVNFQCKEDGIIAQAVDDSRVLLVSLEIGVEAFQEYRC
---VT---N--K-SQI-R--------TW-S-N---S-----------R-GE-G-KL----
   ||        | | |        |    |   |           |  |   ||    
DHPVTLGMDLTSLSKILRCGNNTDTLTLIADNTPDSIILLFEDTKKDRIAEYSLKLMDID
--F-SL-EL-VD---E--SGE---I-R--A--T-AFN-----E--Q-V---D--------
  |    ||  |      | |   | |         |     |    |   |        
ADFLKIEELQYDSTLSLPSSEFSKIVRDLSQLSDSINIMITKETIKFVADGDIGSGSVII
K-F--F--P---L-IEVNK-V---Y---Y-FS--KG-TL--K--I-------A----N-K
| |     |      |    |       |     ||  |     |       |      |
KPFVDMEHPETSIKLEMDQPVDLTFGAKYLLDIIKGSSLSDRVGIRLSSEAPALFQFDLK
----Q-FTAVK-N-DY-EMT-F----N--NE-TS-V-MPC-E--------DDHH--LPT-
    | | | |      |   |             |   | |        ||    |   
SGFLQFFLAPKLEAKFEEASLFKRIIDGFKDCVQLVNFQCKEDGIIAQAVDDSRVLLVSL
---V---Q-F--D--FT-GID--DLEN--K--SK-D--SLV-----D-IIGI---C-K--
   |   |    |   | | |   |          |   |      | ||       |  
EIGVEAFQEYRCDHPVTLGMDLTSLSKILRCGNNTDTLTLIADNTPDSIILLFEDTKKDR
-S-Y-----E-DA--TKI-------T-----------VR-----S-N-N----RE----V
   |       ||   ||       |           ||     |   |     |    |
IAEYSLKLMDIDADFLKIEELQYDSTLSLPSSEFSKIVRDLSQLSDSINIMITKETIKFV
A-----------K------------R---N--I-------YLMD----TS-G-KV-V---
|           |                           || |     |    |     
ADGDIGSGSVIIKPFVDMEHPETSIKLEMDQPVDLTFGAKYLLDIIKGSSLSDRVGIRLS
T-A-TL--W----G----------------EDA-------D--K-------F----DG--
  |  |       |                | |       |  |       |    ||  
SEAPALFQFDLKSGFLQFFLAPKFNLEAKFEEASLFKRIIDGFKDCVQLVNFQCKEDGII
------SR-------------Q------PV-----L-AI-K----G---------A----
      ||             |      ||     |    |    |         |    
AQAVDDSRVLLVSLEIGVEAFQEYRCDHPVTLGMDLTSLSKILRCGNNTDTLTLIADNTP
-------------RV---S--------DF--------GGR-SL-----S--V--LS--S-
             |    |        ||            ||     |  |  ||  | 
DSIILLFEDTKKDRIAEYSLKLMDIDADFLKIEELQYDSTLSLPSSEFSKIVRDLSQLSD
S--------TI--IA-------N----P--D-------I------P-E----A-Y-----
|        ||   |            |  |       |      |      | |     
SINIMITKETIKFVADGDIGSGSVIIKPFVDMEHPETSIKLEMDQPVDLTFGAKYLLDII
K---L--R-G----------W-FDAE-G--Q------
|   |  | |            ||   |  |      
KGSSLSDRVGIRLSSEAPALFQFDLKSGFLQFFLAPK
1jmc 3k4x  135  238  757  56.72  17.83
KVVPIASLTPYQSKWTIC-ARVTN--KSQ-IRTWSNSRGEGKLFSLELVDESGEIRATAF
                      |    ||  |   | | |  |   |             
-ALQAKQYGDF-DRYVLALSWQTGFCQSQHDRN-RNERDECRL-QTETTNKADFLTVHGL
NEQVDKFFPLIEVN-KVYY-FSKGTLKIANKQFTAVKNDYEMTFNNETSVMPCEDDHHLP
     |      |       |   |  | |    |      |    ||     |    | 
WPGLPKSVAARGVDERRWMRFGCATRPIPNLP-EA-RAS-RMCSSPETG-LSLETAAKLS
TVQFDFTGIDDLENKSKDSLVDIIGICKSYE-DATKIT-VRSNNR-EVAKRNIYLMDTSG
 |     |   ||           | |     ||   | || |           | |  |
EVMPGAGGRSCLE-R-YE-YAK-HGACFGFDPDAYFGTMVRLNQEIKESEAGKFLADNYG
KVVTATLW-GEDADKFDGSR-QPV-LAIKG--ARVSDFGGRSLSV-LSSSTIIANPDIPE
| |         |          | |   |  |        |           ||   | 
KTVSRRDFDAAFAKSWGKENVKAVKLTCQGNPAYLTEI-QISIKADAINAPLSANSFLPQ
AYKLR-G-WF--DAEGQ
      |  |  |  | 
PHPGNCGKTFVIDKAGY
1jmc 2z70   51  238  244  21.43  20.90
------K----------V----VP-I-AS---L-----------T-P--YQ---S-----
      |                |   |    |           |    ||   |     
REALWSKWDNASDSQRRLAEKWLPAVQAADEMLNQGISTKTAFATVAGHYQVSASTLRDK
--------K--W-----T----------I-------------C-------AR-----V--
        |  |                |             |       ||        
YYQVQKFAKPDWAAALVSEFDEDAWQFLIADYLRPEKPAFRKCYERLELAAREHGWSIPS
--T-----------------------------------------------N------KS-
  |                                               |      |  
RATAFRRIQQLDEAMVVACREGEHALMEHLDAMQWINGDGYLHNVFVRWFNGDVIRPKTW
--Q-IRT-----W----S-N------S------R-G--E-----------G---------
  |   |     |    | |      |      | |  |           |         
FWQDVKTRKILGWRCDVSENIDSIRLSFMDVVTRYGIPEDFHITIDNTTGGAPNRYRFKV
-----K-LF----S----L-ELVDE--------SG-------E-I--R---A-----T--
     | ||         | | ||          |            |   |     |  
KEDDPKGLFLLMGAKMHWLEEYVDKHPALAGAYTGPNPQAKPDNYGDRAVDAELFLKTLA
---A-FN-----E-QV--DK--F---F-----------P--------LI--E-VN-----
   | ||     |      |  |   |           |        |   | ||     
EGVAMFNARTGRETEMCGGKLSFDDVFEREYARTIVRKPTEEQKRMLLLPAEAVNVSRKG
-------------K-VYY---------------F--SK--G-----TL--K-I--A----
             | |||               |            ||    |  |    
EFTLKVGGSLKGAKNVYYNLALMLAGVKKVVVRFDPQQLHSTVYCYTLDGRFICEAECLR
-----NKQF---T--AV---KNDYE-M-T-FNNET-S---V----MPC-E--DD------
      ||    |  |    | | |       |   |         |     |       
EYRRRQKQLKSATKAAIKAQKQDREALWSKWDNASDSQRRLAEKWLPAVQAADEMLNQGI
-----------HH-L--PT-------VQ-F---DF-TG-I---D-D----L--E----NK
           |      |       || |   |         | |    |        |
STKTAFATVAGHYQVSASTLRDKYYQVQKFAKPDWAAALVSEFDEDAWQFLIADYLRPEK
-S--K--D--SL-V-D----I---------I-----G--I-CKSYE--DATK-I------
    |      |        |         |          |   |  ||   |      
PAFRKCYERLELAAREHGWSIPSRATAFRRIQQLDEAMVVACREGEHLDAMQWINGDGYL
--T-VR-SN-N--R-------EV-A-K----R-----NI--Y-L--MD--TS-G--K---
    ||  |    |        |   |    |     ||    |  ||  |  |      
HNVFVRWFNGDVIRPKTWFWQDVKTRKILGWRCDVSENIDSIRLSFMDVVTRYGIPEDFH
V-V--T---ATLW---G----------EDADK--F--DG------S----R---Q--P--
     |   |  |   |          ||  |  |   |      |        |  |  
ITIDNTRGAANKWLTGGAPNRYRFKVKEDDPKGLFLLMGAKMHWTSVVAGKGWGQAKPVE
----V--L-A-I-K-----GA-------R-V-SD-F------G--------GR-S-----
    |  |     |     ||       | |    |      |        ||       
RAFGVGGLEEYVDKHPALAGAYTGPYGDRAVDAELFLKTLAEGVAMFNARTGRETEMCGG
-LS---VLS-S-S-TIIANP--D------IP-EA--------Y--K----LRG-----W-
 ||   |       ||   |          | ||           |    | |       
KLSFDDVFEREYARTIVRKPTEEQKRMLLLPAEAVNVSRKGEFTLKVGGSLKGAKNVYYN
--------------F--------------D------AE-----G----------------
              |              |      ||     |                
LALMLAGVKKVVVRFDPQQLHSTVYCYTLDGRFICEAECLAAAGREYRRRQKQLKSATKA
------Q-----------
      |           
AIKAQKQMDALEVAELLP
1jmc 4fcy  144  238  918  60.50  15.69
K-VVPIAS--L-TPY--QSKW-T-ICARVTNK-SQ----I-RT---WS-N------S-RG
|  |      | | |       |   ||      |       |             | | 
KDLVDTTEMYLRTIYELEEEGVTPLRARIAERLEQSGPTVSQTVARMERDGLVVVASDRS
-E----GK-L----F-S--L-E-LV-DESG-EI-RA--TAFN-EQV--DKF-FPLIEV-N
      |  |         | | |  |  |  |      |   | |  |     |  |  
LQMTPTGRTLATAVMRKHRLAERLLTDIIGLDINKVHDEADRWEHVMSDEVERRLVKVLK
K--V-----Y----Y-F-SKG-T-L--KIANK--Q----F--T-A---------VKND--
|  |     |    |     | | |   ||    |       | |         |  |  
KDLVDTTEMYLRTIYELEEEGVTPLRARIAERLEQSGPTVSQTVARMERDGLVVVASDRS
YEMT-F-NN-ETSVM-P---CE---DD-HHLP-T-V--QFD-FTGI--DDLE-N--K-SK
  ||       | ||      |    |   |    |    |       |  |    |  |
LQMTPTGRTLATAVMRKHRLAERLLTDIIGLDINKVHDEADRWEHVMSDEVERRLVKVLK
DSLVDIIGI-CKS-YE-DATKIT-VRSN--NR-E---------VAK--RN-IYLM--D--
  |||         ||      |  |     | |         ||   |        |  
KDLVDTTEMYLRTIYELEEEGVTPLRARIAERLEQSGPTVSQTVARMERDGLVVVASDRS
---T-SGK-VVT--------A----T-LWG-E-----D-ADKF-----DG-S-R------
   |  |    |        |    |   |       | ||       |    |      
LQMTPTGRTLATAVMRKHRLAERLLTDIIGLDINKVHDEADRWEHVMSDEVERRLVKVLK
QP-V------L-AI-----KG-----ARVSD-F--GGRSLS--V--LS-SS-TIIANP-D
   |      |  |      |     ||        |   |  |           |    
KDLVDTTEMYLRTIYELEEEGVTPLRARIAERLEQSGPTVSQTVARMERDGLVVVASDRS
I---P--E----A----YKL--R------G------------W---F-D-AE----G--Q
    |       |      |  |      |            |     |  |        
LQMTPTGRTLATAVMRKHRLAERLLTDIIGLDINKVHDEADRWEHVMSDEVERRLVKVLK


1jmc 1f5t   96  238  480  40.34  20.00
KVVPIASLTPYQSKWTICARVTNKSQIRTWSNSRGEGKLFSLELVDESGEIRATAFNEQV
     |   |          | ||     |  |            | |        ||  
----MA--RP--A-F-----V-NK--L--W--S-----M--VN--DKS--------NE--
DKFFPLIEVNKVYYFSKGTLKIANKQFTAVKNDYEMTFNNETSVMPCEDDHHLPTVQFDF
 | |  |        |  |          | |  |  |     |   |    ||     |
-K-F--I-----HW-S--T---SGESI-VVPN-RE-RF-----VQ--E---VLP--KY-F
TGIDDLENKSKDSLVDIIGICKSYEDATKITVRSNNREVAKRNIYLMDTSGKVVTATLWG
          | |             |    |    |     | |     |       | 
----------KHS---------NF--AS-F-V----RQL---NMY-----G-------W-
EDADKFDGSRQPVLAIKGARVSDFGGRSLSVLSSSTIIANPDIPEAYKLRGW-FDAEGQ
                |   |                  | |       | | |  |  
----------H-----K---V-----Q-------N----N-D---S---R-WEFENE-R
1jmc 3hts   42  238   82  17.65  51.22
KVV-PIA-S-LTPYQSKWTICARVTNKSQIRTWSNSRGEGKLFSLELVDESGEIRATAFN
    |         |        | |    |              |||   | |    ||
SSPGPTCYGYIDDEQDLALVFQGVFN-GNLRCIERRPYDAE--KVELVN-PGNI--FVFN
EQVDKFFPLIEVNKVYYFSKGTLKIANKQFTAVKNDYEMTFNNETSVMPCEDDHHLPTVQ
|   |    |       ||     |  | |  |   |     |          |  |   
E--EK-SG-IK-RWTDGFSWSPSRISGK-F-LV---YR-EY-NR---L---GSHNVP--E
FDFTGIDDLENKSKDSLVDIIGICKSYEDATKITVRSNNREVAKRNIYLMDTSGKVVTAT
     |   |           |  |     |      |     |    |  |      | 
YN---I--FE-RAHRKYF-YTGLLK--K--T-FSLKFNMTDSTK----L-ETF-HLI-A-
LWGEDADKFDGS-RQPVLAIKGARVSDFGGRSLSVLSSSTIIANPDIPEAYKLRGWFDAE
   |  |   || | |           |  |     |     |      |    |     
YYTE-KDIHQGSLRRP--S-ENPFFHKF--R--P--SQKLLDALQKV--AVG-NG--RSN
GQ
  
PS
1jmc 4m8b   47  238  181  19.75  25.97
KVVPIASLTPYQSKWTICARVTNKSQ-I-RTWSNSRGEGKLFSL-ELVDESGEIR--ATA
|      |     ||            | |   ||        |  |  |         |
KYQQLENLES-GWKWAYLVKKHREGEAITRHIENSAAQDAVEQLMKLENEPVKVQEWIDA
-FNEQV-DKFFPLIEVNKVYYF-S--KGTLKIA-NKQFTAVKN-D-Y-EMTFN--NETSV
  |          |       |      | |      |              |    | |
HMNVNLATRMKQTIRARRKRHFNAEHQHTRKKSIDLEFLVWQRLAVLARRRGNTLSDTVV
MPCEDDHHLPTVQFDFTGI-DDL-E--NKSK-DSLVDI-IG-----ICKSY-E-DA-TK-
   ||                ||     | |   |     |       |   |  | |  
QLIEDAERKEKYASQMSSLKQDLKDILDKEKYQQLENLESGWKWAYLVKKHREGEAITRH
I-TVRSNNR-E-VAK-RN--IYLMD-TSGKV-VT-ATLWGED--A-DK--FDG----SR-
|         |   |  |              |  ||       |  |  |       | 
IENSAAQDAVEQLMKLENEPVKVQEWIDAHMNVNLATRMKQTIRARRKRHFNAEHQHTRK
QPV-LA-IKGARVSDFGGRSLSVLSSSTI--IANPDIPEAY--KLRGW-FDAEG-Q
    |      |      |    ||      |      | |         |     
KSIDLEFLVWQRLAVLARRRGNTLSDTVVQLIEDAERKEKYASQMSSLKQDLKDIL
1jmc 3veb   53  238  295  22.27  17.97
-------------------K--------V---V-------P-------------------
                   |                    |                   
GSQFLLSVREFMQTRYYAKKTIEAYLHWITRYIHFHNKKHPSLMGDKEVEEFLTYLAVQG
-I-------A----S------L-TP------YQ-S----K----WT--------------
         |    |      | ||       | |    |     |              
KVATKTQSLALNSLSFLYKEILKTPLSLEIRFQRSQLERKLPVVLTRDEIRRLLEIVDPK
----I------------C-------------A-----------R-VT-------N-KSQI
    |            |             |           | ||         | ||
HQLPIKLLYGSGLRLMECMRLRVQDIDFDYGAIRIWQGKGGKNRTVTLAKELYPHLKEQI
--------R-------------T--------------W--------------S-------
        |             |              |              |       
ALAKRYYDRDLHQKNYGGVWLPTALKEKYPNAPYEFRWHYLFPSFQLSLDPESDVMRRHH
-N------S--R-G-E-G--K------L---F-S--LE----L--V-------D----E-
 |         |   | |  |      |   |    ||       |       |      
MNETVLQKAVRRSAQEAGIEKTVTCHTLRHSFATHLLEVGADIRTVQEQLGHTDVKTTQI
----------S---G--------E-I--R--A--T--A----------F-N---------
          |   |        |    |  |  |  |          | |         
YTHSGVLSPLSRLMGSQFLLSVREFMQTRYYAKKTIEAYLHWITRYIHFHNKKHPSLMGD
----E-------Q--V-DK----------F---------------F---------P--L-
    |       |  |  |          |               |         |  | 
KEVEEFLTYLAVQGKVATKTQSLALNSLSFLYKEILKTPLSLEIRFQRSQLERKLPVVLT
---I----E-VN-K----V---Y--------------------Y-----F-SK-G-----
   |    | |  |        |                    |        | |     
RDEIRRLLEIVDPKHQLPIKLLYGSGLRLMECMRLRVQDIDFDYGAIRIWQGKGGKNRTV
T--------LK--I--A----NK---Q--F------TAV--K--N-DYE-----M--TF-
|        ||  |  |         |         ||   |  |  ||         | 
TLAKELYPHLKEQIALAKRYYDRDLHQKNYGGVWLPTALKEKYPNAPYEFRWHYLFPSFQ
-------------N-NET--------S-----V---MPC------------E---D----
               |||        |           |            |   |    
LSLDPESDVMRRHHMNETVLQKAVRRSAQEAGIEKTVTCHTLRHSFATHLLEVGADIRTV
-D---H----------H---------L-P-------------------------TVQ---
     |          |         | |                         |     
QEQLGHTDVKTTQIYTHVLDRGASGVLSPLSRLMGSQFLLSVREFMQTRYYAKKTIEAYL
--------F----------D-----F-T-----G-I---------D-------D------
        |          |     | |     |                          
HWITRYIHFHNKKHPSLMGDKEVEEFLTYLAVQGKVATKTQSLALNSLSFLYKEILKTPL
-LE---NKS----K-------DS----L--VD------I--I---G--I--C--------
 ||     |    |       |     |  ||      |      |     |        
SLEIRFQRSQLERKLPVVLTRDEIRRLLEIVDPKHQLPIKLLYGSGLRLMECMRLRVQDI
---------------K------S---Y----E-----------DA-TK----I---T-V-
               |          |    |           |   |        |   
DFDYGAIRIWQGKGGKNRTVTLAKELYPHLKEQIALAKRYYDRDLHQKNYGGVWLPTALK
----------R----------S----NN---R----E-V---A-KRN-----I-------
          |          |         |    | |   |  |      |       
EKYPNAPYEFRWHYLFPSFQLSLDPESDVMRRHHMNETVLQKAVRRSAQEAGIEKTVTCH
-----Y---LM----D--T---S-G----K------------V---------------V-
         |     |  |     |    |            |               | 
TLRHSFATHLLEVGADIRTVQEQLGHTDVKTTQIYTHRGASGVLSPLSRLMGSQFLLSVR
----T---A--T----L-W----------------G----ED-----A-D-----K----
    |   |  |    | |                |    |      |       |    
EFMQTRYYAKKTIEAYLHWITRYIHFHNKKHPSLMGDKEVEEFLTYLAVQGKVATKTQSL
------F---D----G-S------R-Q-----P-V---------L--A-------IK---
      |          |      | |     | |         |          ||   
ALNSLSFLYKEILKTPLSLEIRFQRSQLERKLPVVLTRDEIRRLLEIVDPKHQLPIKLLY
GA----------RV-S-DF-----------GG--R--SLS----------V-LS------
|           ||   ||           ||  |   |             |       
GSGLRLMECMRLRVQDIDFDYGAIRIWQGKGGKNRTVTLAKELYPHLKEQIALAKRYYDR
---SST---I-I--A------N-P-D-------------I-PEA------Y-------K-
              |      | |                 ||               | 
DLHQKNYGGVWLPTALKEKYPNAPYEFRWHYLFPSFQLSLDPESDVMRRHHMNETVLQKA
L-R-----G-----------W-F---------D---A-E--G-------Q----------
  |     |             |         |     |  |       |          
VRRSAQEAGIEKTVTCHTLRHSFATHLLEVGADIRTVQEQLGHTDVKTTQIYTHVLDRGA
----------
          
SGVLSPLSRL
1jmc 2a3v  163  238 1270  68.49  12.83
KVVPIASLTPYQSKWTICARVTNKSQIRTWSNSRGEGKLFSLELVDESGEIRATAFNEQV
        |     |  |      ||      |  |  |        | |       |  
E-------T--DCRWDGC------SQ-E-F-DSQ-E-QL--VHHIN-S-E-H--IHGER-
DKFFPLIEVNKVYYFSKGTLKIANKQFTAVKNDYEMTFNNETSVMPCEDDHHLPTVQFDF
 | |    |        |        | |    |             |  |   |  |  
-KEF----V--CHW-G-GCSR-ELRPFKA-Q--YMLVVHMRRHT-G-EKPHKC-T--FE-
TGIDDLENKSKDSLVDIIGICKSYEDATKITVRSNNREVAKRNIYLMDTSGKVVTATLWG
 |      ||  |        |     |    ||   |  |   |     |    |    
-G---C-RKSY-SRLE--NL-K-----THL--RSHTGE--K-P-YMCEHEG-CSKA--FS
EDADKFDGSRQPVLAIKGARVSDFGGRSLSVLSSSTIIANPDIPEAYKLRGWFDAEGQ
   |      |          |         |   |     | |            | 
NASDR--AKHQ---N-R-TH-SN-EKPYVCKLPGCT-KRYTD-PSSLR-KHVKTVHG-
1jmc 2gli   43  238  155  18.07  27.74
--KV--V---P------IAS-LT---PY-QS-K-WT-ICAR-VTNKSQIRTWSNSRGEGK
  |       |          ||         |       |  ||         | |  |
GVKCHNTDSEPLKNEDLLKNLLTMGVDIDMARKRQPGVFHRMITNEQDLKMFLLSKGASK
-LF-S-L----E-L--VDE--S--GEI-R--ATA---F-N--EQ-VDKFF-P---L-IEV
    |             |  |      |   |      |  |     ||     |  | 
EVIASIISRYPRAITRTPENLSKRWDLWRKIVTSDLEIVNILERSPESFFRSNNNLNLE-
NKV-YYFSKG-T---L-K-IAN--KQFT-AVKNDYEMT-FNNETSV-MPCED--D--HH-
|      | | |   |     |    |         |  |           |  |     
NNIKFLYSVGLTRKCLCRLLTNAPRTFSNSLDLNKQMVEFLQAAGLSLGHNDPADFVRKI
L---PTVQFDFT-GID-DLE-NKSKDSL--VD-IIGIC-KSYE--DATKITVRSNNREVA
    |      |       |   |   |        ||    |  |      |       
IFKNPFILIQSTKRVKANIEFLRSTFNLNSEELLVLICGPGAEILDLSNDYARRSYANI-
KRNIY-L--MDTS-GK-VVT-A-TLW-GEDA--DKFD-----G-S-RQ----P-VL--AI
|     |        | |          |    || |       |  |    | ||   |
KEKLFSLGCTEEEVQKFVLSYPDVIFLAEKKFNDKIDCLMEENISISQIIENPRVLDSSI
K--GARVSDF--GGRSLSVLSSSTIIA-NPDIPEAYKLRGWFDAEGQ
     |       |  || |   |         || ||         
STLKSRIKELVNAGCNLSTL-NITLLSWSKKRYEA-KLKKLSRFAHH
1jmc 3n6s   67  238  343  28.15  19.53
KVVPIASLTPYQSKWTICARVTNKSQIRTWSNSRGEGKLFSLELVDESGEIRATAFNEQV
    |        |     |    |   |     | |  |     | |   |   |   |
----I------E-K-----RLA--SLL-T-----GQGLAFRVQ--DASLPGRPD-F--VV
DKFFPLIEVNKVYYFSKGTLKIANKQFTAVKNDYEMTFNNETSVMPCEDDHHLPTVQFDF
|       |     |  |        |      |   |     | |        |  |  
DE-Y-RC-V--I--FTHG----C---FWHHHHCY-L-F--K--V-PA--T-R--T-EF-W
TGIDDLENKSKDSLVDIIGICKSYEDATKITVRSNNREVAKRNIYLMDTSGKVVTATLWG
     ||   |      ||  |  |       |   |    |   |      |     | 
-----LE---K------IG--KNVE-------R-DRRDIS-R---LQELGWRVL--IVW-
EDADKFDGSRQPVLAIKGARVSDFGGRSLSVLSSSTIIANPDIPEAYKLRGWFDAEGQ
| |    | |   |    |       | |         |   |       |       
ECA--LRG-REK-LTDE-A-LTE---R-LEEWICGE-GASAQI-DT---QG-IHLLA-
1jmc 1odg   48  238  133  20.17  36.09
KVVPIASLTPYQSKWTICARVTNKSQIRTWSNSRGEGKLFSLELVDESGEIRATAFNEQV
   | |        |   |                |   |    | |     | |     
D--PLAEVV---A-W---A-L--E-HL----H---E-Q-F--D-V-ET--L-A-A-----
DKFFPLIEVNKVYYFSKGTLKIANKQFTAVKNDYEMTFNNETSVMPCEDDHHLPTVQFDF
             | |  |       |         |     |  |      | | |   
----------RA-YMSRRT--F-DRRF---RS---LT--G--SA-PLQ---WLIT-Q---
TGIDDLENKSKDSLVDIIGICKSYEDATKITVRSNNREVAKRNIYLMDTSGKVVTATLWG
     |       |          |     |  |          |  |     | |   |
R-V--LQ--AQ-RL-----L----E-----T--S---D------YSVD---E-V-A---G
EDADKFDGSRQPVLAIKGARVSDFGGRSLSVLSSSTIIANPDIPEAYKLRGWFDAEGQ
     |   | || |  |     |  |    | ||   |      ||  |      | 
R-CG-F---RSPV-ALRG-H---F--RR-Q-LGSSP--A-A-YRAAYRAR---RPQG-
1jmc 3w6v   46  238  110  19.33  41.82
-K-VVPIAS-LTP-YQS-KWTICARV--TNKS--Q--I-RTWSNS-R--G--EGKLF---
      | |     |         |    | |       |  |             |   
NENRIQIMSTIAKIYRAMSRELNRRLGELNLSYLDFLVLRATSDGPKTMAYLANRYFVTQ
S-LEL-VDESGEIR-ATAFNEQVDKFFPLIEV-NK-VYYFSKG-TL--KIANKQFTA-VK
|     ||   |           |    |||   |    | ||     | ||   |    
SAITASVDKLEEMGLVVRVRDREDRRKILIEITEKGLETFNKGIEIYKKLAN-EVTGDLS
ND-YEMTFNNETSVMP-CED-DHHLPTVQFDFTGIDDL-ENKSKDSLVDIIG-ICKSYED
 |                |         |   | |       |   |    |    || |
EDEVILVLDKISKILKRIEEISQNENRIQIMST-IAKIYRAMSRE-LNRRLGELNLSYLD
ATKITVRSNN-REVA-KRNIYLMDTSGKVVTATLWG-EDAD---KF-D-GSRQPVL-AI-
       |      |   | |   |     ||     |         |   |   |  | 
FLVLRATSDGPKTMAYLANRYFV-TQ-SAITASVDKLEEMGLVVRVRDREDRRKILIEIT
-KGARVSDFGGRSLSVLSSS-T-IIANPDIPEAY-KLRGWFD--AE-GQ
 ||      |      |    |             |         |  |
EKGLETFNKGIEIYKKLANEVTGDLSEDEVILVLDKISKILKRIEEISQ
1jmc 3gfi   56  238  284  23.53  19.72
KVVPIASLTPY-QS--KW-TIC-A-R-VTNKSQI-R-----TW-SN--SRGEGK--LFSL
|            |  |   |    |     |   |     ||       |  |  |  |
KGGWFGKHRGQGGSNPKFENIAEGLRALLARSHVERTTDEGTWVAGVFVYGGSKTSLYNL
EL-VDES-GEIRAT--A---FN-EQ-V-DKFFPLIEVNKVYYFSKG-TLKI-ANKQFTAV
           | |      |           || |   | ||       | |     | 
RRGTALAIPQCRLTPLSRLPFGMAPGPGPQPGPLRE-SIVCYFMVFLQTHIFAEVLKDAI
KNDYEMTFNNET-SV-MP-CE-DDH-HLPT-VQF-DFTGIDDLENKSKDSLVD-IIG-IC
| |  ||    |       |  ||   ||    |    |     |               
K-DLVMTKPAPTCNIRVTVCSFDDGVDLPKGGWFGKHRG-QGGSNPKFENIAEGLRALLA
KSY-EDAT-KIT-VRS-NNREVAKRNIY-L-MDTS-G--KV-VT--ATL-WG-EDA-DKF
 |  |  |   | |         |   | |   |         |    |  |        
RSHVERTTDEGTWVAGVFVYGGSKTSLYNLRRGTALAIPQCRLTPLSRLPFGMAPGPGPQ
DGS-RQPVLAIKGARV-SDFGGRSLSVLSSSTIIANPDIPEA-YKLRGW-FDAEG-Q--
 |  |                   |           |  |          ||  |    
PGPLRESIVCYFMVFLQTHIFAEVLKDAIKDLVMTKP-APTCNIRVTVCSFD-DGVDLP
1jmc 1b3t   58  238  294  24.37  19.73
KV--VPIASL-TPY-QSKWTICARVTNKS-QIR-T-WSNSR-G---E--GKLFS-LEL-V
       | |     | |    |     |   |             |    |   |   |
LIRRLKDARLRAGISQEKLGVLAGIDEASASARMNQYEKGKHAPDFEMANRLAKVLKIPV
-------DESGEIRAT--AFNEQVDK---FF--PLI-EV-N-KVYY-FS--K-GTLK-I-
       |    |  |    |||  |   |    ||            |  | | |  | 
SYLYTPEDDLAQIILTWNELNEQERKRINFYIRMLIRRLKDARLRAGISQEKLGVLAGID
-----A--N---K-Q----F---T--A-V-K---ND-Y--E-------MTFN--N--E--
     |  |   |      |      | | |      |  |        | |  |  |  
EASASARMNQYEKGKHAPDFEMANRLAKVLKIPVSYLYTPEDDLAQIILTWNELNEQERK
-TS--V-MPC-E-DDHHLPT-V-Q--FD-FTGIDD----LE-N---KSK---D-SLVD-I
       |      |  |     |       |||        |   | |   |       
RINFYIRMLIRRLKDARLRAGISQEKLGVLAGIDEASASARMNQYEKGKHAPDFEMANRL
IGICK---S--Y--E-DATKITVRSN--NREVAKR-NIYLMDTS---GKVVTATL-WGED
    |   |  |  | |   |    |  |    || | |             | |  |  
AKVLKIPVSYLYTPEDDLAQIILTWNELNEQERKRINFYIRKKAMLIRRLKDARLRAGIS
ADKFD---G-SRQPVLA-I----KGARVSDF--GGRSLSVLS-SSTIIANPDIPEAYKLR
  |     |       |      ||    ||    |   ||         |    |    
QEKLGVLAGIDEASASARMNQYEKGKHAPDFEMANRLAKVLKIPVSYLYTPEDDLAQIIL
GW--F-DAE----G-Q-
 |      |        
TWNELNEQERKRINFYI
1jmc 4jqd   79  238  377  33.19  20.95
KVVPIASLTPYQSKWTICARVTNKSQIRTWSNSRGEGKLFSLELVDESGEIRATAFNEQV
   |    |         ||   |       |  |   ||   |  |    |   |  ||
E-HPFI-VTE-PGE--V-AR--GK---K---N--GLDYLF--HLY-E--QCR--EFLLQV
DKFFPLIEVNKVYYFSKGTLKIANKQFTAVKNDYEMTFNNETSVMPCEDDHHLPTVQFDF
                |   |  |  |   |        |    |     |         
-Q--TIAK-DR---GEKCPTKVTNQVFRYAKKS-GASYINKPK-M--R--HYV-HC-YAL
TGIDDLENKSKDSLVDIIGICKSYEDATKITVRSNNREVAKRNIYLMDTSGKVVTATLWG
   |  |  |   |                 | |  |        |            | 
HCLDE-E-AS-NAL----R--RAFKERGE-NVGS-WRQACYKP--LVNIACR--HG--WD
EDADKFDGSRQPVLAIKGARVSDFGGRSLSVLSSSTIIANPDIPEAYKLRGWFDAEGQ
 ||  |     | | |    |     | |  |       |     |        |   
IDA-VFN-A-HPRLSI-W-YVPT-KLRQLCHLERN----NA-V--A----A---A-AA
1jmc 2vy2   45  238  162  18.91  27.78
K-V---V--P-I-----ASLTPYQS-KWTI-CARVTN-K--S-Q-IRTW-SNSR--GEGK
         |       |   | |   |     |    |  | |    | |  |    | 
QNITARIGEPLVLKCKGAPKKPPQRLEWKLNTGRTEAWKVLSPQGGGPWDSVARVLPNGS
LF--SLELVDESGEIRATAFNEQ-VD-K--F----F-----P-LI----E----V-NKV-
||       || |  |  | |      |             |       |    | ||| 
LFLPAVGIQDE-GIFRCQAMNRNGKETKSNYRVRVYQIPGKPEIVDSASELTAGVPNKVG
YYFSK-----GT----L--K--IANKQFTAVKND---Y-E--M-TFNNE---T-S----V
   |      ||    |  |    |     ||       |    |   |   |       
TCVSEGSYPAGTLSWHLDGKPLVPNEKGVSVKEQTRRHPETGLFTLQSELMVTPARGGDP
MP---CE-D---D-HH-LPT--VQ---F----D---FTG-I-DD--LENK-S--K-----
 |   |        |  | |   |        |    |  |     |  |    |     
RPTFSCSFSPGLPRHRALRTAPIQPRVWEPVVDAQNITARIGEPLVLKCKGAPKKPPQRL
D-SL----VD---II-----G----ICK-----S-YEDATKI--T-V-R--S-N-N-REV
   |                |            |    |  |      |    | |  | 
EWKLNTGRTEAWKVLSPQGGGPWDSVARVLPNGSLFLPAVGIQDEGIFRCQAMNRNGKET
-AK-R-NIY-------LMD-----TSG---KV---V---T--A-TL-W---GED-A--DK
    |   |         |     | |   ||   |      | || |   |       |
KSNYRVRVYQIPGKPEIVDSASELTAGVPNKVGTCVSEGSYPAGTLSWHLDGKPLVPNEK
---F-DGSRQ-P-V-L-AIKG-ARVSDF-GG--R-SLSVLSSSTIIANPDIPEA-YKLRG
        |  |   |        |    ||  |   |   |           |    | 
GVSVKEQTRRHPETGLFTLQSELMVTPARGGDPRPTFSCSFSPGLPRHRALRTAPIQPRV
WFDAEGQ
|      
W-EPVPL
1jmc 4oi7   87  238  425  36.55  20.47
---------K---V-V----PIA---SL-TPYQ-SKW--TI--CA-RV----TNKSQI--
         |   |      ||          |  |       |   |    |  | |  
APPSSFSAAKQQAVKIYQDHPISFYCGCDIEWQGKKGIPNLETCGYQVRKQQTRASRIEW
R----TW--SNSR------G-E--GK---LFSL-E--L--VDES-GEIRA-TA-FN-EQ-
      |     |      |     |    | | |  |       ||       ||  | 
EAVVPAWQFGHHRQCWQKGGRKNCSKNDQQFRLMEADLHNLTPAIGEVNGDRSNFNFSQW
--VD--KFFPL-IEVN----KVY--YFSKGTL-K--I-ANKQ--FTAVKNDYE-M-TFNN
  ||          ||    ||       |              |   |     |   | 
NGVDGVSYGRCEMQVNFKQRKVMPPDRARGSIARTYLYMSQEYGFQLSKQQQQLMQAWNK
ETSV--MPC-EDD-------HHLPTVQFDF-T-G-IDDLE-NK--S-K---D---SL---
   |    |  ||        | | ||    |          |    |   |   |    
SYPVDEWECTRDDRIAKIQGNHNPFVQQSCQTQAPPSSFSAAKQQAVKIYQDHPISFYCG
VDI-----IGI-----C----KSYED-ATKI----TV---R-SNNREV-AK--R-NIYLM
 ||      ||     |          |  |     |        |    |  | |    
CDIEWQGKKGIPNLETCGYQVRKQQTRASRIEWEAVVPAWQFGHHRQCWQKGGRKNCSKN
DTSGKVVTA---TLW---GE-DADK----F------DG-S--R-QPVLAIKGARV--SD-
|       |    |    ||   |     |      || |  |       |   |   | 
DQQFRLMEADLHNLTPAIGEVNGDRSNFNFSQWNGVDGVSYGRCEMQVNFKQRKVMPPDR
F-G--GRS-L--S----V-LS--SSTII-A-N---P-D----I-PEAY-KLRG-W--FDA
  |   |  |  |      ||        | |   | |           |  |    |  
ARGSIARTYLYMSQEYGFQLSKQQQQLMQAWNKSYPVDEWECTRDDRIAKIQGNHNPFVQ
EGQ
   
QSC
1jmc 1oup   87  238  423  36.55  20.57
KV--VP-I-----A----S------LT---PYQ----S--------KWTIC-AR--VTN-
     |       |    |      ||          |        |      |    | 
RIKGIPKLDDANDAGGRNSTECTLILTEGDSAKTLAVSGLGVVGRDKYGVFPLRGKILNV
K--S--QI-RTWS-NS--R--G-E-GKLF----SLE-L------V----DESG-EIRA-T
   |  ||      |      |    |      ||  |           |  |  |    
REASHKQIMENAEINNIIKIVGLQYKKNYEDEDSLKTLRYGKIMIMTDQDQDGSHIKGLL
A-F---N-EQ-V-DKF---F--PLIEV--NK--V-YY----F-----S------------
  |   |        |   |  |   |  ||     |    |     |            
INFIHHNWPSLLRHRFLEEFITPIVKVSKNKQEMAFYSLPEFEEWKSSTPNHKKWKVKYY
K--G--T---LK--IAN-K----QF-----------T-A-----V---K----N------
|  |  |    |   |  |    ||             |         |    |      
KGLGTSTSKEAKEYFADMKRHRIQFKYSGPEDDAAISLAFSKKQIDDRKEWLTNFMEDRR
---------D--Y-E----MT-----------F-N--NE-T--S-V--M-P--------C
         |  |       |           | |  ||    | |    |        |
QRKLLGLPEDYLYGQTTTYLTYNDFINKELILFSNSDNERSIPSMVDGLKPGQRKVLFTC
-E--D--------------D----HH----L-PT-V---Q-F------D-------F-T-
    |                   ||    |  |     | |              | | 
FKRNDKREVKVAQLAGSVAEMSSYHHGEMSLMMTIINLAQNFVGSNNLNLLQPIGQFGTR
---G--------I---------------DD-----L--EN-K-SKD---SLVD-I-I---
   |        |               ||     |   |                |   
LHGGKDSASPRYIFTMLSSLARLLFPPKDDHTLKFLYDDNQRVEPEWYIPIIPMVLINGA
-GI-----CK--SY---E---------DA--------T-K-I--TV-R-S-N--------
 ||     ||       |         |           |    |      |        
EGIGTGWSCKIPNFDVREIVNNIRRLMDGEEPLPMLPSYKNFKGTIEELAPNQYVISGEV
---N----R--E--V-----A-K-R------N--------I--Y--L-MD---------T
   |       |  |       |        |        |  |     |         |
AILNSTTIEISELPVRTWTQTYKEQVLEPMLNGTEKTPPLITDYREYHTDTTVKFVVKMT
------S---G--KV--V-TA-T-----LW---G---E-D-A-D--K--FD------GSR
          |  ||    |  |     |    |     |   |     |       | |
EEKLAEAERVGLHKVFKLQTSLTCNSMVLFDHVGCLKKYDTVLDILRDFFELRLKYYGLR
-Q---PVL-A--IK--G-AR-VSD-F-G-----G---RSL-SVL-----SSSTIIA----
       | |   |    ||       |           |  ||      |    |    
KEWLLGMLGAESAKLNNQARFILEKIDGKIIIENKPKKELIKVLIQRGYDSDPVKAWKET
-N--PDIP----------E-A-Y---K------L-R---G--W------F----DA-EG-
 |   | |          |       |      | |      |      |     | |  
FNYLLDMPLWYLTKEKKDELCRLRNEKEQELDTLKRKSPSDLWKEDLATFIEELEAVEAK
-----Q
     |
EKQDEQ
1jmc 4fm9  123  238  726  51.68  16.94
--KVVPIAS-LTPYQS-KWTICAR-VTNKSQI----RTWS-NS--R-GE-GKLFS--LEL
       |         |   |      |       ||          | || ||    |
FSRSDHLAEHQRTHKPYKCPECGKSFSDKKDLTRHQRTHTGEKPYKCPECGKSFSQRANL
-VDE---SGEIRATAFNEQVDKFFPL--IEVNKVYYFSKGTLKI--ANKQFTAVKN--DY
        ||    |  |    |  |                |     | |    |    
RAHQRTHTGE-KPYACPECGKSFSQLAHLRAHQRTHTGEKPYKCPECGKSFSREDNLHTH
EMTFNNETSV-MP-C-E-----D--D-H---HLP-TV-QF--DFTGIDDL-EN-KSKDSL
  |   |     | |       |    |   | |         |   | | |        
QRTHTGEKPYKCPECGKSFSRRDALNVHQRTHKPYACPECGKSFSRSDHLAEHQRTHTGE
VDI-IGIC-KSYEDATKITVRSNNREVAKRNIYLMDTSGKVVT--ATLWG-E---DADK-
       | ||  |    | |           |     ||     | |          | 
KPYKCPECGKSFSDKKDLT-RHQRTHTGEKP-YKCPECGKSFSQRANLRAHQRTHTGEKP
F---D-GSRQPVLA-IKGARVSDFGGRSLSVLSSSTIIANPD-IPEAYKLRGWFDAEGQ
      |     ||          |                |            ||   
YACPECGKSFSQLAHLRAHQRTHTGEKPYKCPECGKSFSREDNLHTHQRTHTRRDAL-N
1jmc 2i13   53  238  295  22.27  17.97
-K--VV-PI---ASL--TPY-Q----S-K-WTICAR-VTN--KS-Q-IRTW-SNS----R
                  |  |    |               |          |      
MRTELLSKLYDDFGIDQLPHTQHGVTSDRLGKLYEKYILDIFKDIESLKKYNTNAFPQEK
G-EGK-L--FSLEL---VD-ESG--EI-R--A-----T-A-----FNEQVDKFFPL-IE-
    | |    | |    |  |      |  |     | |     |  |     || |  
DISSKLLKALNLDLDNIIDVSSSDTDLGRTIAGGSPKTDATIRFTFHNQSSRLVPLNIKH
VN--KV----Y--------Y-FSKGTLK--I---ANKQ----FTAV-K----N--D-Y-E
    ||    |           | | ||  |    | |    || | |         | |
SSKKKVSIAEYDVETICTGVGISDGELKELIRKHQNDQSAKLFTPVQKQRLTELLEPYRE
------MTFNNETS---VM-P---C--E--DDHHLP-TVQ----F--D------------
       |   | |      |         |      |         |            
RFIRWCVTLRAEKSEGNILHPDLLIRFQVIDREYVDVTIKNIDDYVSDRIAEGSKARKPG
F-TGID------D----LE--N-K----SK--DSL-VD-I--I--GI----C-KSYE---
| ||                        ||  |    |       |       | ||   
FGTGLNWTYASGSKAKKMQFKGMRTELLSKLYDDFGIDQLPHTQHGVTSDRLGKLYEKYI
-DATK-I-TVRS-N-N---RE--V-AK--R--NI-Y--LMD-TSGKV-VTATL-WG--E-
 |  | |      | |    |     |     |       |  |       |   |    
LDIFKDIESLKKYNTNAFPQEKDISSKLLKALNLDLDNIIDVSSSDTDLGRTIAGGSPKT
DAD-K--F-D-GSR-QPVLAIK-GA--RVS----D---F----G---G------R-----
||     |    ||  | | ||      ||    |        |   |      |     
DATIRFTFHNQSSRLVP-LNIKHSSKKKVSIAEYDVETICTGVGISDGELKELIRKHQND
-S--L-S-V----LS---S---ST-I---I---A-----N---PD-------IP-E----
 |  |   |    |           |       |     |   ||       |  |    
QSAKLFTPVQKQRLTELLEPYRERFIRWCVTLRAEKSEGNILHPDLLIRFQVIDREYVDV
A------Y---------KLR------G--W-F---D-AEG-Q---
       |         | |      |  |       |   |   
TIKNIDDYVSDRIAEGSKARKPGFGTGLNWTYASGSKAKKMQFKG
1jmc 1sa3   99  238  524  41.60  18.89
--KV-V-P---I--A--SL-TPYQ-SK---W--T--ICA-----R----V-TNKSQI--R
       |          |   |   |           |          |  ||      
LTQLSLPPGFRFYPTDEELMVQYLCRKAAGYDFSLQLIAEIDLYKFDPWVLPNKALFGEK
TW---S-----N----S---R--G-------E----G--K-L-F-----------S--L-
 |   |     |    |      |       |    |  | | |                
EWYFFSPRDRPNRVAGSGYWKATGTDKIISTEGQRVGIKKALVFYIGKAPKGTKTNWIMH
E--LVDESGE-I--R------AT--A------F---NEQ--VD----K---F-F--PLI-
|  |   |      |       |         |    |   |     |     |   || 
EYRLIEPSDDWVLCRIYKKQPLTQLSLPPGFRFYPTDEELMVQYLCRKAAGYDFSLQLIA
E---------V--NK-V------YYF----------S---K--GTLK-IANK-QFTAVKN
|         |  ||        | |          |   |  || | |    |    | 
EIDLYKFDPWVLPNKALFGEKEWYFFSPRDPNRVAGSGYWKATGTDKIISTEGQRVGIKK
D---Y--E--M-T-FN---NETSVM-PCED----D-H--HL-------PT-----VQ---
    |       |  |    |     |  |          |       ||     ||   
ALVFYIGKAPKGTKTNWIMHEYRLIEPSDDWVLCRIYKKQLPPGFRFYPTDEELMVQYLC
-----FDFT----G-ID----D---LENKS----KD----SLVDIIG-ICKS-Y-E-DAT
      ||       ||    |   | ||     |     |  |       | |     |
RKAAGYDFSLQLIAEIDLYKFDPWVLPNKALFGEKEWYFFSPRDRPNRVAGSGYWKATGT
-K-I-T--VRSN-NRE-V-----A-K--R-N-I---Y-LMDTS-G----KV-----VT-A
 | | |   |       |     | |    | |   | |   |              |  
DKIISTEGQRVGIKKALVFYIGKAPKGTKTNWIMHEYRLIEPSDDWVLCRIYKKQPLTQL
TL-WG-------ED--AD----K---FDGS-R---Q-------P-VL---AIKGAR----
 |  |       |         |    | |             | ||   |  |      
SLPPGFRFYPTDEELMVQYLCRKAAGYDFSLQLIAEIDLYKFDPWVLPNKALFGEKEWYF
VS--D---F-G-G--RSL-S--VLSS--STI-I--A------N-P-----D-IPEAYKL-
 |  |     | |           |       |  |        |       |   | | 
FSPRDPNRVAGSGYWKATGTDKIISTEGQRVGIKKALVFYIGKAPKGTKTNWIMHEYRLI
R-G--W-F-DA-EGQ
     |        |
EPSDDWVLCRIYKKQ
1jmc 3swm  106  238  555  44.54  19.10
KVVPIASLTPYQSKWTICARVTNKSQIRTWSNSRGEGKLFSLELVDESGEIRATAFNEQV
                                       |  ||  | |   |  |    
-IGRLRGII-IEKQPPLVL-I-EVGGV-GY-EVHMPMTCF-YEL-PEAGQ-EAIVFT-H-
DKFFPLIEVNKVYYFSKGTLKIANKQ-FTAVKNDYEMTFNNETSVMPCEDDHHLPTVQFD
  |    |     |   |     |||  |  |     | |                 |  
--FV-VREDAQLLY---G-FN--NKQERTLFK-ELIKT-NGVGPKLALAILSGM-SAQ-Q
FTGIDDLENKSKDSLVDIIGICKSYEDATKITVRSNNR-EVAKRNIYLMDTSGKVVTATL
|      |      ||   || |    |    |    |                | |   
F--VNAVEREEVGALVKLPGIGK--KTAERLIVEMKDRFKGLHGDLF-TPAADLVLTSAT
WGEDADKFDGSRQPVLAIKGARVSDFGGRSLSVLSSSTIIANPDIPEAYKLRGWFDAEGQ
   ||           |  |        |   |  |   || ||       |    |   
--DDAEQ-E-AVAALVAL-GYKPQE-ASR-M-V--SK--IARPDASSETLIREALRA-AL


1jmc 1c7y   44  238  198  18.49  22.22
K-V-------V------P---IA--S-LT--PYQ-S-----K------W--T--------
  |       |      |   ||    |   ||  |     |                  
RIVAADTGGAVLDESFQPVGLIATVAVLVEKPYKTSKRFLVKYADPYNYDLSGRQAIRDE
I--C---AR-VT------NKS----QIR-----TW-S-N-S-RG-E-GK-LF-SLE-LV-
|      || |       |        |     |      | || |  | |   |  |  
IELAIELAREVSPDVIHLNSTLGGIEVRKLDESTIDALQISDRGKEIWKELSKDLQPLAK
---DESG-E---I-------R-A-T-A--F-------N--E------------QV----D
    | | |   |       | |   |  |       |  |             |    |
KFWEETGIEIIAIGKSSVPVRIAEIYAGIFSVKWALDNVKEKGGLLVGLPRYMEVEIKKD
K-F---F-P----L---I--EV--N-K--VY-------Y--F---S-K-------G-TL-
|       |    |      ||    |   |          |   |         |  | 
KIIGKSLDPREGGLYGEVKTEVPQGIKWELYPNPLVRRFMVFEITSMRIVAADTGGAVLD
---K----I---A---NKQF-TA----VK-ND---YEMT----F-NN-ETSV-MPCE-D-
        |   |    |   |     ||  |   |            |       |   
ESFQPVGLIATVAVLVEKPYKTSKRFLVKYADPYNYDLSGRQAIRDEIELAIELAREVSP
D-HHL-PT-----V-QFD-FT---------G--I--D---DLE---NK----------S-
|  ||  |     |   |  |         |  |      ||     |            
DVIHLNSTLGGIEVRKLDESTIDALQISDRGKEIWKELSKDLQPLAKKFWEETGIEIIAI
-KDSL-VDI--I--GI-----C------K-----S---Y-E-D--ATK-I--TV--R--S
 | |  | |  |  ||            |         | |      | |      |   
GKSSVPVRIAEIYAGIFSVKWALDNVKEKGGLLVGLPRYMEVEIKKDKIIGKSLDPREGG
--NN-R-EV--A-K-R---N-------IY-L--M-----DTSG-------K-V--V-T-A
       ||    |     |             |     || |         |    | |
LYGEVKTEVPQGIKWELYPNPLVRRFMVFEITSMRIVAADTGGAVLDESFQPVGLIATVA
TL----W--GE----D-AD--KFD--G--S-RQPV-LAIKGAR-VS-D-------FGG--
 |               ||    |  |    |    |||  || || |        ||  
VLVEKPYKTSKRFLVKYADPYNYDLSGRQAIRDEIELAIELAREVSPDVIHLNSTLGGIE
-R----S----L--S-----V---LS-----------------------SS-----T-I-
 |    |    |  |         ||                       ||       | 
VRKLDESTIDALQISDRGKEIWKELSKDLQPLAKKFWEETGIEIIAIGKSSVPVRIAEIY
--I-----A--N-----------P---------D--I-----P-E-A-Y---K--L-RG-
  |     |  |           |         |  |     | |   |   |     | 
AGIFSVKWALDNVKEKGGLLVGLPRYMEVEIKKDKIIGKSLDPREGGLYGEVKTEVPQGI
-W--F-D-------A-E-GQ
 |              |   
KWELYPNPLVRRFMVFEITS
1jmc 4yow  132  238  680  55.46  19.41
KVVPIASLTPYQSKWTICARVTNKSQIRTWSNSRGEGKLFSLELVDESGEIRATAFNEQV
            |   |  |              | |  | |  |  ||           
----------H-S---I--R-----EL-------GIGLNF-LK-V--SG-M---SYKD-I
DKFFPLIEVNKVYYFSKGTLKIANKQFTAVKNDYEMTFNNETSVMPCEDDHHLPTVQFDF
 |     | |     |      | |  |         |    || |             |
AK--K--E-N-L---S----R-A-K-VT--R-----AF-QAASV-P-Q-E--I--ISL-F
TGIDDLENKSKDSLVDIIGICKSYEDATKITVRSNNREVAKRNIYLMDTSGKVVTATLWG
  |         |            |  ||     |    |    |     |   |    
P-I------A--S--E---L--NFND-YKI-L-F-N--YYK-G--L-E---K---A---N
EDADKFDGSRQPVLAIKGARVSDFGGRSLSVLSSSTIIANPDIPEAYKLRGWFDAEGQ
|       |  | |  |     |        |    |     |    |          
E-S--L-SSTLPIL--K-EEIKDL-D-T-N-LPPD-IY-KKEILNIIK-K----SK-N
1jmc 3vwb   42  238  115  17.65  36.52
-KV--VP-I--A-SLTP------Y-Q-----------SKWTI-C---A---RV-TNKS-Q
     ||         |      | |           || |  |   |   |     |  
IHLDPVPSFEDRHEIKPWLQKIFYPQGIDIVIERSDSSKVTFKCRSVACPFRIRAAYSVR
IRTW-----SN--S---R-G-----EG-KLF--SL-----E--L-V-D--E---S-G-E-
   |      |  |   |          | |   |     |      |  |   |     
LQKWNVVVMNNIHSHELRFDLITKTDDYKKFKENLRQKNDEKAIKTFDELEYKASLNLPL
IR---ATAF---NE-Q--VDK-FFP----L-IE------VN-K---V---Y-----Y---
|       |    |      | | |      ||      |  |   |         |   
IHLDPVPSFEDRHEIKPWLQKIFYPQGIDIVIERSDSSKVTFKCRSVACPFRIRAAYSVR
FSK-G--TL-KI-ANK-QFTAV-K-NDY----E-M----------TFNN-E--TSV-MP-
  |        |      |    |  ||    |            ||   |   |   | 
LQKWNVVVMNNIHSHELRFDLITKTDDYKKFKENLRQKNDEKAIKTFDELEYKASLNLPL
-CE-D------D-HHL-PTVQ-FDF-TGIDDLENKSKDSLVDI-I-GI-C----K-SYE-
    |      | |   |  |      |||     |  | |        |       |  
LIHLDPVPSFEDRHEIKPWLQKIFYPQGIDIVIERSDSSKVTFKCRSVACPFRIRAAYSV
DATK--ITVRSN---N--R-E-VAKRNIY------LMDTSG-KVV-T-------ATL-WG
   |    |  |      |     |   |      |      |   |       | |   
RLQKWNVVVMNNIHSHELRFDLITKTDDYKKFKENLRQKNDEKAIKTFDELEYKASLNLP
---E-D-ADKF-DGSR-QPVL-AI---KGAR-V---SD-----FGGRS-----L----SV
     |    | |     | |  |    |   |   ||     |  ||          ||
LLIHLDPVPSFEDRHEIKPWLQKIFYPQGIDIVIERSDSSKVTFKCRSACPFRIRAAYSV
-LSS-STIIA-N----P---D-IPEA--Y---K--LR------G--WFD-AE---G-Q--
 |         |        | |     |   |  ||          ||  |        
RLQKWNVVVMNNIHSHELRFDLITKTDDYKKFKENLRQKNDEKAIKTFDELEYKASLNLP
-
 
L
1jmc 4lmg   97  238  481  40.76  20.17
--K-----V----VP---IA-------S---LT----PY---QS---K-W----T-I---
  |           |    |           |      |        |      |     
IAKNDFSDIELAAIPFNTLADHYGERLAREQLALEHESYEMGEARFRKMFPLITTLLPKM
CAR-------V--------T------N-KSQ------IR-T----WS--N-------S--
 ||       |        |        |        |  |     |  |       |  
IARINDWFEEVKAKRGKRPTAFQFLQEIKPEAVAYITIKTTLACLTSADNTTVQAVASAI
-RG---E---G--K-L----F--SL-E-L---------------V--D------------
 |    |   |    |    |     | |               |  |            
GRAIEDEARFGRIRDLEAKHFKKNVEEQLNKRVGHVYKKAFMQVVEADMLSKGLLGGEAW
-----E-S---G----E--I---------R--A--------T---A--FNE---------
     | |   |    |  |         |  |        |   |    |         
SSWHKEDSIHVGVRCIEMLIESTGMVSLHRQNAGVVGQDSETIELAPEYAEAIATRAGAL
-------Q---V-DK---------FF-----P--LIEV-N-K-------VY----Y----
       |   |  |                |  |      |       ||    |    
AGISPMFQPCVVPPKPWTGITGGGYWANGRRPLALVRTHSKKALMRYEDVYMPEVYKAIN
------F--S-K-----G--T-----------------L--K---I--------------
           |        |                 |  |   |              
IAQNTAWKINKKVLAVANVITKWKHCPVEDIPAIEREELPMKPEDIDMNPEALTAWKRAA
-A----N---K-----------Q---F-T--AV--K-N-D-----YEMT-FN---NE-T-
 |        |           |   |    |     | |     |    ||   |  | 
AAVYRKDKARKSRRISLEFMLEQANKFANHKAIWFPYNMDWRGRVYAVSMFNPQGNDMTK
S-V-M----P---------------C---------E-----DD-H-H-L-----P---T-
         |               |         |        |         |   | 
GLLTLAKGKPIGKEGYYWLKIHGANCAGVDKVPFPERIKFIEENHENIMACAKSPLENTW
-V-Q----------FDFTGID--DLE-N--------------K--S---KD-------S-
   |          |   |     |  |                 |    |         
WAEQDSPFCFLAFCFEYAGVQHHGLSYNCSLPLAFDGSCSGIQHFSAMLRDEVGGRAVNL
L----V-DIIGI-CKSY-E----DA---T--K-ITVR-SN-NR--E-V------------
|    | || ||  |   |    ||   |     ||   |     | |            
LPSETVQDIYGIVAKKVNEILQADAINGTDNEVVTVTDENTGEISEKVKLGTKALAGQWL
A--------KRNI----Y----------LM-DT------S-------------G---K--
|        ||      |             ||      |             |   |  
AYGVTRSVTKRSVMTLAYGSKEFGFRQQVLEDTIQPAIDSGKGLMFTQPNQAAGYMAKLI
---V-VT---A--TL-W---------GE--D-----------A------D---------K
   | ||   |     |          |  |           |      |         |
WESVSVTVVAAVEAMNWLKSAAKLLAAEVKDKKTGEILRKRCAVHWVTPDGFPVWQEYKK
---------FDGS-R-QP-V-L---A-I---K---G-A-R-V-S-D---------FG---
         | |  | ||         |   |   | |   | | |              
PIQTRLNLMFLGQFRLQPTINTNKDSEIDAHKQESGIAPNFVHSQDGSHLRKTVVWAHEK
-G-RSLSVL-SS-STI---IAN---P--D--I-P-E-----A--Y-------------K-
 |  |      |  ||    ||             |     |  |             | 
YGIESFALIHDSFGTIPADAANLFKAVRETMVDTYESCDVLADFYDQFADQLHESQLDKM
--L--RG-W-F-D-AEGQ----
  |   |     |  |      
PALPAKGNLNLRDILESDFAFA
1jmc 1cez  137  238  862  57.56  15.89
-KVVPIASLTPYQSKWTICARVTNKSQIRTWSNSRGEGKLFSLELVDESGEIRATAFNEQ
    ||      |     |     |   |          ||   |        |      
SSATPI--V-QFQGE-SNC--L--KC-FR-YRLNK-HRHLF--DLISSTWH-WASP--KA
VDKFFPLIEVNKVYYFSKGTLKIANKQFTAVKNDYEMTFNNETSVMPCEDDHHLPTVQFD
  |      |   |  |         ||    |             |     |       
PHK-HAIVTV--TYH-SE---E-QRQQF--L-N---VV---K--I-P-PTIRH----KLG
FTGIDDLENKSKDSLVDIIGICKSYEDATKITVRSNNREVAKRNIYLMDTSGKVVTATLW
|     |   |    |   |   |     |   |   |   |    | |        | |
FMSM-HLLS-SATPIVQFQG--ES--NCLK-CFR--YR-LNKHR-HLFD----LISST-W
GEDADKFDGSRQPVLAIKGARVSDFGGRSLSVLSSSTIIANPDIPEAYKLRGWFDAEGQ
     |                |    |    |     |  | |    || |       
HWASPKAP-HKHAIVTVT-YH-SE-EQRQ-QFL-NVVKIP-PTI-R-HKL-GFMSMHLL
1jmc 2ayb   43  238  172  18.07  25.00
-K--V-----------V----------PI--------A----SL--T-------------
 |  |           |          ||        |    ||  |             
MKFTVEREHLLKPLQQVSGPLGGRPTLPILGNLLLQVADGTLSLTGTDLEMEMVARVALV
-PYQ-------S-K-WTIC---------A------R--V----------T-------N--
 |           |   ||         |      |  |          |       |  
QPHEPGATTVPARKFFDICRGLPEGAEIAVQLEGERMLVRSGRSRFSLSTLPAADFPNLD
--KS-------Q--I-R----T-WS----------N-----SRG-E-------G-KL---
   |       |    |    |  |          |       | |       |  |   
DWQSEVEFTLPQATMKRLIEATQFSMAHQDVRYYLNGMLFETEGEELRTVATDGHRLAVC
---F--SL-------------EL---VD--ES------G--EIRA-TA---FNEQ-VD-K
      ||             ||    |          |   |||      |    ||  
SMPIGQSLPSHSVIVPRKGVIELMRMLDGGDNPLRVQIGSNNIRAHVGDFIFTSKLVDGR
F--F-------P---------LI-E------V--N-K---V-YYFSKGTLKI-A-N-KQ-
|          |         |            | |   |  | |   ||| | |  | 
FPDYRRVLPKNPDKHLEAGCDLLKQAFARAAILSNEKFRGVRLYVSENQLKITANNPEQE
-----F--T---A-VK---N-DY----------E----M-T--FNN---E---T-S----
        |   |      |  |          |    | |        |     |    
EAEEILDVTYSGAEMEIGFNVSYVLDVLNALKCENVRMMLTDSVSSVQIEDAASQSAAYV
VMP-------CEDDH------H----L---PT--V------QF-D----FTGID-DLENK
|||        |  |           |   ||         |  |     || |   |  
VMPMRLMKFTVEREHLLKPLQQVSGPLGGRPTLPILGNLLLQVADGTLSLTGTDLEMEMV
SKDSLV---D-----I-----IGICKSY-E--D-AT-----KITV-----R---S-----
    ||                 ||    |    |         |     |   |     
ARVALVQPHEPGATTVPARKFFDICRGLPEGAEIAVQLEGERMLVRSGRSRFSLSTLPAA
---N--N-R-EV------A--KR------------NI--YL--M--DTSGKVV-T-AT--
   |      ||      |  ||                ||  |   | |    | ||  
DFPNLDDWQSEVEFTLPQATMKRLIEATQFSMAHQDVRYYLNGMLFETEGEELRTVATDG
--L----W--GED--A-D-----K--------FD-G-S--R-Q--P--VLA-----I---
  |       |            |         | |    | |       |     |   
HRLAVCSMPIGQSLPSHSVIVPRKGVIELMRMLDGGDNPLRVQIGSNNIRAHVGDFIFTS
K---G-----ARV---S-D--F--G--------GR-S-LS------V-L--SSSTI-I-A
|   |      ||     |     |         |   ||      | |  |     | |
KLVDGRFPDYRRVLPKNPDKHLEAGCDLLKQAFARAAILSNEKFRGVRLYVSENQLKITA
-NPDIPEA-------Y---KLR-GW---F--D---A-------------------E---G
 ||   ||       |       |       |   |                   |    
NNPEQEEAEEILDVTYSGAEMEIGFNVSYVLDVLNALKCENVRMMLTDSVSSVQIEDAAS
Q-----------
|           
QSAAYVVMPMRL
1jmc 3bep  133  238  732  55.88  18.17
KVVPIASLTPYQSKWTICARVTNKSQIRTWSNSRGEGKLFSLELVDESGEIRATAFNEQV
           |          |     |          |     |  |     |     
-----------Q----V---I-N-----T----------F-----D--G-V---A-----
DKFFPLIEVNKVYYFSKGTLKIANKQFTAVKNDYEMTFNNETSVMPCEDDHHLPTVQFDF
|    |      |   |  |           |||  |   |           |  |    
D--Y-L-Q---TYH--K--L----------PNDY-IT-KSE-A----Q---ALGWVA-S-
TGIDDLENKSKDSLVDIIGICKSYEDATKITVRSNNREVAKRNIYLMDTSGKVVTATLWG
 |   |     |  |   |  ||      |   | |||  |    |   ||     | | 
KG--NL---A-D--V-APG--KSI-GG-DI-F-S-NRE-GK----LPGKSGR----T-WR
EDADKFDGSRQPVLAIKGARVSDFGGRSLSVLSSSTIIANPDIPEAYKLRGWFDAEGQ
| ||             | | ||   |     ||   |        |     |     
E-AD-I--N-Y-T-S--GFRNSD---R-I-LYSSDWLIYK--TTDHYQ-T--F-TKIR
1jmc 1rnb   50  238  109  21.01  45.87
------------------K-----V--VP-------IA-SL-TP--Y--------Q--SK
                  |         |       ||    |            |  | 
PHRYRPGTVALREIRRYQKSTELLIRKLPFQRLVREIAQDFKTDLRFQSSAVMALQEASE
-W-------T-IC---A-RVT--NKS-Q----IR--T-WS--N-S--R-G-EG--K----
         |  |   | |||   |  |    ||             |    |  |    
AYLVALFEDTNLCAIHAKRVTIMPKDIQLARRIRGERGGAKRHRKVLRDNIQGITKPAIR
-L-----FS-LE-LV-DES-G------E--IR-ATAFNE----Q-V---D-----K----
 |           |   |  |      |  || |    |      |   |     |    
RLARRGGVKRISGLIYEETRGVLKVFLENVIRDAVTYTEHAKRKTVTAMDVVYALKRQGR
----F--------------FP------LI------E-V--N-KVY------YF-S---K-
    |              ||      |       | |     ||      |        
TLYGFGAKAKTRSSRAGLQFPVGRVHRLLRKGNYAERVGAGAPVYLAAVLEYLTAEILEL
-G--------T----------------L-K------IA------N----------KQ---
 |        |                | |      ||      |          |    
AGNAARDNKKTRIIPRHLQLAVRNDEELNKLLGRVTIAQGGVLPNIQSVLLPKTRKESYA
---F---------TAV--K---------ND-Y-----E---MT-FN------N-E--TSV
             |    |         ||       |       |        |  | |
IYVYKVLKQVHPDTGISSKAMSIMNSFVNDVFERIAGEASRLAHYNKRSTITSREIQTAV
---MPCE-DDH-----------H----L-P-TV--------Q-----------F------
    | |   |                  | ||        |           |      
RLLLPGELAKHAVSEGTKAVTKYTSARYRPGTVALREIRRYQKSTELLIRKLPFQRLVRE
---DF-T-------GI----D--D-----L-E--N------K--S---KD-SL-------
   || |                      | |  |      |      ||  |       
IAQDFKTDLRFQSSAVMALQEASEAYLVALFEDTNLCAIHAKRVTIMPKDIQLARRIRGE
---------V--D-I--I---GI---C-----K--S---Y-----------E----DA--
         |  | |  |    |         |  |   |           |    ||  
RGGAKRHRKVLRDNIQGITKPAIRRLARRGGVKRISGLIYEETRGVLKVFLENVIRDAVT
-T-----K-IT----V--------------------R-S------------------N--
 |     |  |    |                    | |                  |  
YTEHAKRKTVTAMDVVYALKRQGRTLYGFGGAKAKTRSSRAGLQFPVGRVHRLLRKGNYA
---------------------------N--RE------V------A--------K---R-
                           |  |              |        |   | 
ERVGAGAPVYLAAVLEYLTAEILELAGNAARDNKKTRIIPRHLQLAVRNDEELNKLLGRV
---------N---------------I--Y--L----------------M-----D-----
         |               |  |  |                |     |     
TIAQGGVLPNIQSVLLPKTRKESYAIYVYKVLKQVHPDTGISSKAMSIMNSFVNDVFERI
----------------TS------------G---K--V------V---T--A-T---L--
                ||            |   |  |      |   |  | |   |  
AGEASRLAHYNKRSTITSREIQTAVRLLLPGELAKHAVSEGTKAVTKYTSAAKTLKDLDG
W--------G---ED-------------------AD-----K-----F-D----------
|        |    |                    |     |     | |          
WQVIITDDQGRVIDDNNRRRSRKRGGENVFLKRISDGLSFGKGESVIFNDNVTETYSVYL
----------G-------S--R-----------Q----------P-----------V---
                  |  |           |          |           |   
IHEIRLNTLNNVVEIWVFSYLRWFELKPKLYYEQFRPDLIKEDHPLEFYKDKFFNEVNKS
---L-A----I--K-----G------------------------------A---------
   | |    |  |     |                              |         
ELYLTAELSEIWLKDFIAVGQILPESQWNDSSIDKIEDRDFLVRYACEPTAEKFVPIDIF
-------------------R--VS------DF-G---------G---------RS-----
                   |  ||      |  |         |         ||     
QIIRRVKEMEPKQSNEYLKRVSVSVAKTLKDLDGWQVIITDDQGRVIDDNNRRRSRKRGG
----LS-V---LS-----S-------S-T-----I--I---A--N---------------
    |      ||     |         |     |  |      |               
ENVFLKRISDGLSFGKGESVIFNDNVTETYSVYLIHEIRLNTLNNVVEIWVFSYLRWFEL
----------PD-I----P-EAY---------K-------------LR-----G------
          || |    | | |         |             |      |      
KPKLYYEQFRPDLIKEDHPLEFYKDKFFNEVNKSELYLTAELSEIWLKDFIAVGQILPES
-W------------F------D--AE-----G--------------Q-----------
 |            |         ||                    |           
QWNDSSIDKIEDRDFLVRYACEPTAEKFVPIDIFQIIRRVKEMEPKQSNEYLKRVSVS
1jmc 3tu4  163  238 1198  68.49  13.61
KVVPIASLTPYQSKWTICARVTNKSQIRTWSNSRGEGKLFSLELVDESGEIRATAFNEQV
   | |           |   |             |    |  | |     |  | |  |
-AEP-A-M--I-AE---C-K-T-RTEV--F-----E--I-SRRLID-----RTNA-NFLV
DKFFPLIEVNKVYYFSKGTLKIANKQFTAVKNDYEMTFNNETSVMPCEDDHHLPTVQFDF
    |  ||      | |     |       |       |   |  |      || |   
--WPPCVEVQRC---S-G---CCN-------N------RN---VQ-C----R-PT-Q---
TGIDDLENKSKDSLVDIIGICKSYEDATKITVRSNNREVAKRNIYLMDTSGKVVTATLWG
     |        |      |  |    | |    |   |  |       |  | ||  
--V-QL----R-P-VQ-VR--K-IE----I-V----R---KKPIF----K-K-ATVTL--
EDADKFDGSRQPVLAIKGARVSDFGGRSLSVLSSSTIIANPDIPEAYKLRGWFDAEGQ
|     |      || |                  |                      
E-----D---H--LACK-C---E------------T----------------------
1jmc 4hqu   44  238   94  18.49  46.81
-K--VVPIASL-TPYQSKWTICARVTNKSQIRTW-SNSRG-E-G--KL--F---SL----
 |      |     |   |   |                | | |   |      ||    
YKRYICSFADCGAAYNKNWKLQAHLCKHTGEKPFPCKEEGCEKGFTSLHHLTRHSLTHTG
E--LV-DESG-EIR-AT-A-FNEQVDKFFPL-IEVNKVYYFSK-G-TLKIAN--K--QF-
|     |  |   |  | |        |    | |  |  |   |   |  |  |  || 
EKNFTCDSDGCDLRFTTKANMKKHFNRFHNIKICV-YVCHFENCGKAFKKHNQLKVHQFS
-T-AV--K--N---D--YEM-T-F-NNE-TSV-MPC-EDD-----------H--HL----
 |            |            |      ||  ||              |     
HTQQLPYECPHEGCDKRFSLPSRLKRHEKVHAGYPCKKDDSCSFVGKTWTLYLKHVAECH
PTV--QF--DFTGIDDLENKS-K-DS-LVDIIG---I-CK--SYEDA-TKI--TVRSNNR
| |       |       ||  |    |    |     ||    |   |      |    
PVVYKRYICSFADCGAAYNKNWKLQAHLCKHTGEKPFPCKEEGCEKGFTSLHHLTRHSLT
EVAKRNIYLMDTSG---KVVT-ATL---WGEDAD-K-------FD--G-S-RQ-PVLAI-
     |    |  |      | |            |       |   |        |   
HTGEKN-FTCDSDGCDLRFTTKANMKKHFNRFHNIKICVYVCHFENCGKAFKKHNQLKVH
K-G-A-RVS-D--F-G-G-R-SL-SVLS-SSTIIAN-P-DIPEAYKLRG--W--F--D-A
               |   | || | |       |  |          |  |       |
QFSHTQQLPYECPHEGCDKRFSLPSRLKRHEKVHAGYPCKKDDSCSFVGKTWTLYLKHVA
EGQ
|  
ECH
1jmc 1tf6   70  238  361  29.41  19.39
KVVPIASLTPYQSKWTICARVTNKSQIRTWSNSRGEGKLFSLELVDESGEIRATAFNEQV
      |       |                  |    | |    |  |   ||    ||
H--G-SSV--FHN-W-L-LEIACENYF-VYI-KR----L-SAN--D-TG---ATG-GHQV
DKFFPL-IEVNKVYYFSKGTLKIANKQFTAVKNDYEMTFNNETSVMPCEDDHHLPTVQFD
    |  | | |       |    |     |      |     |   | |          
GLYIPSGI-VEKLFPSINHTREL-N---PSV---F-LT-AHVSS-HDCPDS-EARAIYYN
FTGIDDLENKSKDSLVDIIGICKSYEDATKITVRSNNREVAKRNIYLMDTSGKVVTATLW
        |  |       |      |    |        |     |    |       |
SRHFGKTRNE-K-RITR-WGRGSPLQDPEN-T-GALT-LLAFK---LDEQGGDCKEVNIW
GEDADKFDGSRQPVLAIKGARVSDFGGRSLSVLSSSTIIANPDIPEAYKLRGWFDAEGQ
   |   |     |  |  |      |    |      |  |       | |     | 
-VCAST-D--EEDV--IETA-I----G---EVIPGA-LISGP-AGQ-I-L-G-----GL
1jmc 3hqf   43  238  172  18.07  25.00
KVVPIASLTPYQSKWTICARVTNKSQIRTWSNSRGEGKLFSLELVDESGEIRATAFNEQV
      |        |       |               |      |    |        
EFSVCDSVSVWVGDKTTATDIKGK-EVMVLGEV-NI-SVFK-QYFFET-KCRDSGC-RGI
D-KFFPLIEVNKVYYFSKGTLKIANKQFTAVKNDYEMTFNNETSVMPCEDDHHLPTVQFD
| |            | |  |    ||  |            |    |    | |   | 
DSKHWNSY-CTTTHTFVK-ALTMDGKQ-AAWR--F-IRI--DTACV-CVLSRH-P-I-F-
FTGIDDLENKSKDSLVDI-IGICKSYEDATKITVRSNNREVAKRNIYLMDTSGKVVTATL
  |         || |    |  |    || |       ||      |      |     
HRG--EF-SVC-DS-VSVWVG-DKT--TATDI--K--GKEV--M-V-LGEVN-SVFKQYF
WGEDADKFDGSRQPVLAIKGARVSDFGGRSLSVLSSSTIIANPDIPEAYKLRGWFDAEGQ
  |      | |      |    |             |  |   |               
F-ETKCRDSGCR-GIDS-KHWN-S-YCTTTHTFVKALTMAAWRFI-R-ID-TACVCVLSR


1jmc 4zbn   40  238  196  16.81  20.41
KV-V---P----------------I---------------AS-------L---T-P---Y
       |                |               ||       |   |     |
SIWMHPEPAGRRSARSHRTLSRDQIVRAAVKVADTEGVEAASMRRVAAELGAGTMSLYYY
-QSK------W-------T-I---CA---R--VT---N-K-S-QIR-----T-W-S----
   |              |          |   |   | |     |     | |      
VPTKEDLVELMVDEVIGETRLPDRPGPDWRAALTLAANEKRALWLRHPWLATAWRNGHPV
---NS-R-GE---GKL--F--------S---L-----------E---L-------VD--E
   || |  |   | |  |        |   |           |   |       ||  |
WGPNSLRQQEFVLGTLGVFDLQVDELLSLIGLYNGYVESFVRNEVGWLEEARRTKVDMRE
--------------SGE--I--R--A-T-A--------F-N--EQ----V----D-K-FF
              |||     |  | | |        |    |          |     
WMRRSGPYAQQLVDSGEYPMFARVLAETVAPHMGPDQRFRSGLERLLDSIGASLDVSIWM
---P-L----I----------E-V---N--KV-----------YYF--SK----------
   | |    |          | |       |           ||    |          
HPEPTLSRDQIVRAAVKVADTEGVEAASMRRVAAELGAGTMSLYYYVPTKEDLVELMVDE
--G-T-L--------K----I-AN-K-----Q--F--TA------V--KN---DYE--M-
  | | |               || |           ||      |   |     |    
VIGETRLPDRPGPDWRAALTLAANEKRALWLRHPWLATAWRNGHPVWGPNSLRQQEFVLG
T---F--------------N--------N------E---TSV-----M----P-C-E--D
|   |              |        |      |   | |     |    |      |
TLGVFDLQVDELLSLIGLYNGYVESFVRNEVGWLEEARRTKVDMREWMRRSGPYAQQLVD
--DH----H-L-PTV--QF--D--F-TG----ID------D----L--E---------NK
          |  ||      |  |  |     |      |       |           
SGEYPMFARVLAETVAPHMGPDQRFRSGLERLLDSIGASLDVSIWMHPEPAGRRSARSHR
--SKD-----SL-V-D---I-------I----GI-CKS---Y----ED-A---T-K-I--
  | |        | |                |    |   |    ||         |  
TLSRDQIVRAAVKVADTEGVEAASMRRVAAELGAGTMSLYYYVPTKEDLVELMVDEVIGE
T-V--------R------SN--N----RE--VA-K-RN---I----------Y-L--M--
|          |       |       |    |   ||                |     
TRLPDRPGPDWRAALTLAANEKRALWLRHPWLATAWRNGHPVWGPNSLRQQEFVLGTLGV
-D--T----S------G--K--V---V----TA--T---L--W----G----E--D----
 |       |      |     |   |     |  |      |    |       |    
FDLQVDELLSLIGLYNGYVESFVRNEVGWLEEARRTKVDMREWMRRSGPYAQQLVDSGEY
-----------A-----D-KF--------D--G-----S---R-QP------VL--AIK-
           |     |  |        |  |     |      |          | | 
PMFARVLAETVAPHMGPDQRFRSGLERLLDSIGASLDVSIWMHPEPTLSRDQIVRAAVKV
----G---A---RV-SDFG-G-RSL-----S----V-L--------S-----------SS
    |   |   ||    | |  ||          | |                      
ADTEGVEAASMRRVAAELGAGTMSLYYYVPTKEDLVELMVDEVIGETRLPDRPGPDWRAA
-T----------I----I--A--N------P----------------D--IPE--A----
 |                  |  |      |                |    |       
LTLAANEKRALWLRHPWLATAWRNGHPVWGPNSLRQQEFVLGTLGVFDLQVDELLSLIGL
---Y-K--LR---G--------------W------F-----D-----------AE-----
   |     |   |              |            |           ||     
YNGYVESFVRNEVGWLEEARRTKVDMREWMRRSGPYAQQLVDSGEYPMFARVLAETVAPH
-G--Q------------------
 |  |                  
MGPDQRFRSGLERLLDSIGASLD
1jmc 3zql  141  238  923  59.24  15.28
----KV-VPIASL-TPYQ-SKWTICARVTNKSQIRTWS-N-SRGEGKLFSLELVD--ESG
    ||     |         |     |   |   |         |  |  |     || 
GLEDKVSKQLESKGIKFEYEEWKV-PYVIPASN-HTYTPDFLLPNG-IF-VETAGLWESD
EIRATAFNEQVDKFFPLIEVNKVYYFSKGTLKIANKQFTAVKNDY-EM-TFNNETSVMPC
  |            |         ||    |      |       |           | 
D-RKKHLLIR-EQ-HPELDI-RI-VFSSSRTKLYKGSPTSY-GEFCEKHGIKFADKLIPA
E-DDHHLPTVQFD-F-TGIDDLENK-SKDSLVDIIGICK-SYED-ATKITVRSNNREVAK
|        | ||        || | ||  |    || |  ||           |     
EWIKEPKKEVPFDRLKRKRSGLEDKVSK-QL-ESKGI-KFEYEEWKVPYVIPASNHTYTP
RNIYLMDTSGKVV-TATLW-GEDADKFDGSR-Q-P-V-LAI--KGARVSDF-GG-RSL-S
    |    |  | || ||   |  |    | | |     |     |     |   |   
-D-FLL-PNGIFVETAGLWESDDRKKHLLIREQHPELDIRIVFSSSRTKLYKGSPTSYGE
VLSSSTI-IANPDIP-EAYK--LRGW-FD-AEGQ
      |  |   || |  |       ||     
FCEKHGIKFADKLIPAEWIKEPKKEVPFDRLKRK
1jmc 2pfj   60  238  258  25.21  23.26
KVVPIASLTPYQSKWTICARVTNKSQIRTWSNSRGEGKLFSLELVDESGEIRATAFNEQV
                 || |             |     |       |  | |   |  
------------GR---CA-V-----------C-GD-NA-SCQ---HYG-VR-TC--EGC
DKFFPLIEVNKVYYFSKGTLKIANKQFTAVKNDYEMTFNNETSVMPCEDDHHLPTVQFDF
 |            | | |     |   | |  |     |      |      | |    
-K-------G---FF-KRT--V-QK--SA-K--Y-ICLANK-D---C------P-V----
TGIDDLENKSKDSLVDIIGICKSYEDATKITVRSNNREVAKRNIYLMDTSGKVVTATLWG
    |               |       |         |       |     ||  |   
----D-KRR-RNR-CQ---FCR-FQ---K-CL-A----V---G---M-VK-EVV-RT---
EDADKFDGSRQPVLAIKGARVSDFGGRSLSVLSSSTIIANPDIPEAYKLRGWFDAEGQ
      | |    |  || |     ||    |           |   |          
------D-S----L--KG-R-R---GR----L-----------P-S-K---------P
1jmc 1cit   40  238   89  16.81  44.94
-KVVPIA-SLT-PYQ-SKWTICAR-VTNKSQIRTW-SNSRG-EGKLFSLE-LVD-ESGEI
      | |              |  |    |        |   |      | | |    
YPKTGVATSIVEKIERAEFNTAGRKPTVLLRIADFIAAMNGMDAKQ-DMQALWDAEIAIM
--RA-TAFNEQVDKFFPLI-EV----NKVYYFSKG--TL-KIANK-QFTAVKNDY-EM-T
  || |       |    | |             |       |         |      |
NGRAQTTIISYITKYRNAIREAFGDDHPMLKIATGDAAMYDEARRVKMEKIANKHGALIT
FNNETSVMP-CED---DHH-LPT-V-QFDFTG-----I-DDLE-NKS---KD-SLVDII-
| |   |   |||       |         ||          |       |  |   |  
FENYRQVLKICEDCLKSSDPLMIGIGLIGMTGRAPYEVFTQAEFSPAPYGKGVSKWSILF
-GICKSYE-DATK--IT--VRSNNR-E-V--A-K--R-N----I-Y-L-M-D-TS-GKVV
 |  |      ||  ||       | | |  | |  |              |  |     
NGQAKTKQGEGTKFGITYEIPVLTRSETVLAAYKRLRESGQGKLWHGMSIDDFSSETRLL
TA-TLWG--EDA-DKFDGSRQPV-LAIKGARVS--DFGGRSLSVLS-SSTIIA--NPDI-
   |     ||   |      |  |    | |    |        |    |    | |  
LRDTVFNLFEDVWPK-EELPKPYGLRHLYAEVAYHNFAPPHVTKNSYFAAILGHNNNDLE
PE-A---YKLRGWFD-AEGQ-
       | |    | |    
TSLSYMTYTLPEDRDNALARL
1jmc 4f43   64  238  319  26.89  20.06
--K---V------VP-IAS-LTPYQ-S-K---W-----T--------------I---C--
  |   |      || |   |   |   |   |                    |   |  
KIKRIEVLINNGSVPGIPMILNEIQDAIKTVSWPEGNNSFVINPVRKGNGVKPIKNSCMR
-------A-----RV-TN-K-----S-Q-I--R--T--W-S-N---S-R-------G--E
       |     |               |        |   |   | |       |  |
HLHQKGWALEHPVRIKAEMRPGPLDAVKMIGGKAFALEWETGNISSSHRAINKMVMGMLE
-----GKL-F-S--L-E-LVDESG-----E----I-R------A-TAF-N-E------QV
     | |   |      | |  |     |      |      |  |    |      ||
RVIIGGVLILPSRDMYNYLTDRVGNFRELEPYFSVWRQFNLKDAYLAIVEIEHDSVDAQV
-------D--------K-----F-------FPLI--EV-N--K-V-Y-----YF--S---
       |        |              | |  |     | |        |      
SLIPKGTDGRAIRMKIKRIEVLINNGSVPGIPMILNEIQDAIKTVSWPEGNNSFVINPVR
KGT-LK-IAN---K---Q--FT----A-VK-----N--D-YEM----TF-------N---
||   | | |       |           |        |   |     |       |   
KGNGVKPIKNSCMRHLHQKGWALEHPVRIKAEMRPGPLDAVKMIGGKAFALEWETGNISS
-----N-------E-T---SV--MPCED------D---H--HL-P--TV--QF---D-FT
     |       |      |   |  |      |       | |   |  ||   |   
SHRAINKMVMGMLERVIIGGVLILPSRDMYNYLTDRVGNFRELEPYFSVWRQFNLKDAYL
G---I--D--D----L---------------E---NK-S-----------KDSL--V---
    |  |  |    |               |   |  |            |    |   
AIVEIEHDSVDAQVSLIPKGTDGRAMKIKRIEVLINNGSVPGIPMILNEIQDAIKTVSWP
D------I--I----G---I---C------K--S--Y------E------DATK-I----
       |       |   |   |      |            |      || | |    
EGNNSFVINPVRKGNGVKPIKNSCMRHLHQKGWALEHPVRIKAEMRPGPLDAVKMIGGKA
------T-------------V-----R----------S----N-------N-REV----A
      |             |     |          |    |       | ||      
FALEWETGNISSSHRAINKMVMGMLERVIIGGVLILPSRDMYNYLTDRVGNFRELEPYFS
--KR-NI---YL---------MD---------TSG-------K---V-V-TATLWG----
     |    ||          |         | |       |   |        |    
VWRQFNLKDAYLAIVEIEHDSVDAQVSLIPKGTDGRAIRMKIKRIEVLINNGSVPGIPMI
--E--DADK---F-DG--S------R-----QPV----LA-I--KG-A-----RV-S---
  |  || |      |  |      |      |           || |     |      
LNEIQDAIKTVSWPEGNNSFVINPVRKGNGVKPIKNSCMRHLHQKGWALEHPVRIKAEMR
----D----FGGR--SL--SV--LSSS--TI---IANP-D--------I-P--EAYK-L-
    |     ||    |       |||   |                 | |    |  | 
PGPLDAVKMIGGKAFALEWETGNISSSHRAINKMVMGMLERVIIGGVLILPSRDMYNYLT
-R-G-----------W--F---D---A----E----------------G---Q
 | |           |  |   |   |    |                |    
DRVGNFRELEPYFSVWRQFNLKDAYLAIVEIEHDSVDAQVSLIPKGTDGRAIR
1jmc 3odh  132  238  773  55.46  17.08
--K--V-----V----P-I--ASLTPYQ-S---K-WTICAR-VTNKSQIRTWSNSRGEGK
  |  |          | |  | |  |  |     |       | ||         | | 
TFKDYVRDRADLNKDKPVIPAAALAGYTGSGPIQLWQFLLELLTDKS-CQSFISWTGDGW
LFSLELVDESGEIR-ATAFNEQVDKFFPLIEVNKVYYFSKGTL-KIANKQFT-AVKNDYE
 | |   ||    |     |        |      ||  |    | | |        |  
EFKLSDPDEVAR-RWGKRKNKPKMNYEKLSRGLR-YYYDKNIIHKTAGKRYVYRFVCDLQ
MTFNNETSVMPCEDDHHLPTV-QF-DFT-GIDDLENKSKDSLVDIIGICKSYEDATKITV
              |   |    | |      || || |            |     |  
SLLGYTPEELHAMLDVK-PDAGTFKDYVRDRADL-NKDK-PVIPAAALA-GYTGSGPIQL
RSNNRE-VAKRNIY-LMDTSGKVVTATLWGED--ADKFDGSR--QPVLAI-KGAR-VSDF
     |              |      |   |  |    | |   |     |  |     
WQFLLELLTDKSCQSFISWTGDGWEFKLSDPDEVARRW-GKRKNKPKMNYEKLSRGLRYY
GGRS-LSVLSSSTIIAN-P-DIPE--AY---KLRGWFDAEGQ
                    |      |    |    |    
YDKNIIHKTAGKRYVYRFVCDLQSLLGYTPEELHAMLDVK-P
1jmc 3mfk   53  238  273  22.27  19.41
--------------------------K---------V-------------------V-P-
                          |                             | | 
QLTGLCDRFRGFYPVVIDVETAGFNAKTDALLEIAAITLKMDEQGWLMPDTTLHFHVEPF
I-A-----SL-------T-P-------YQS-----KWT---I----C--A-RVT-N-K--
  |      |         |       |       |     |    |  |  |  |    
VGANLQPEALAFNGIDPNDPDRGAVSEYEALHEIFKVVRKGIKASGCNRAIMVAHNANFD
-S------Q---I-R-------TWSN-S-RG-E-G-----K------L-F------S-L-
 |            |       |       |   |     |        |      | | 
HSFMMAAAERASLKRNPFHPFATFDTAALAGLALGQTVLSKACQTAGMDFDSTQAHSALY
--E----L----V--------------DE-----SG--E-IR--------A-TA-FN---
  |    |    |               |      |     |          || ||   
DTERTAVLFCEIVNRWKRLGGWPLSAAEEVNAQLTGLCDRFRGFYPVVIDVETAGFNAKT
--------------EQ---V-D---KF----F------P--L----IEVN---K--V--Y
              ||     |    |    |      |  |    |  |      |  |
DALLEIAAITLKMDEQGWLMPDTTLHFHVEPFVGANLQPEALAFNGIDPNDPDRGAVSEY
---Y--FS---KG---T-L-K-I-----AN---------------KQ--------F-T--
      |    ||         |     ||               |         | |  
EALHEIFKVVRKGIKASGCNRAIMVAHNANFDHSFMMAAAERASLKRNPFHPFATFDTAA
----A----V--K-----N-DYEMT------FNNE-TS------V-----M---P-----
    |    |  |       |   |         | |       |         |     
LAGLALGQTVLSKACQTAGMDFDSTQAHSALYDTERTAVLFCEIVNRWKRLGGWPLSAAE
----C-------------E--------D------------DHH--L-P--T----VQ-F-
    |             |        |            |    | |  |    |  | 
EVGLCDRFRGFYPVVIDVETAGFNAKTDALLEIAAITLKMDEQGWLMPDTTLHFHVEPFV
------D---FTGI---D-D---------L-E-------N-K-S---K----------D-
          | ||   | |         | |         | |              | 
GANLQPEALAFNGIDPNDPDRGAVSEYEALHEIFKVVRKGIKASGCNRAIMVAHNANFDH
----------SL---------V-D------I-IG--I----CK-S-YE-DATK----I--
          ||           |         |       |       | |        
SFMMAAAERASLKRNPFHPFATFDTAALAGLALGQTVLSKACQTAGMDFDSTQAHSALYD
TVR-S----N--NR-E------V-A----K-RNIY--LMD--TSG---K----V-VTA-T
| |         ||          |      |  |    |  | |   |        | |
TERTAVLFCEIVNRWKRLGGWPLSAGLCDRFRGFYPVVIDVETAGFNAKTDALLEIAAIT
L------W-GEDAD-KF--D---GSR-QP-VLAIKG-----A-R--VS------D-F---
|      |   |    |      |   ||  ||  |       |  ||        |   
LKMDEQGWLMPDTTLHFHVEPFVGANLQPEALAFNGIDPNDPDRGAVSEYEALHEIFKVV
--G----G--RSLSVL--SS---STII-----A----N---P----D---IPE-AY-K--
  |    |  |   |        |        |    |   |    |       |     
RKGIKASGCNRAIMVAHNANFDHSFMMAAAERASLKRNPFHPFATFDTAALAGLALGQTV
L-R-----GW-F----------D----A----E---------G---Q--
|       |  |          |    |    |         |      
LSKACQTAGMDFDSTQAHSALYDTERTAVLFCEIVNRWKRLGGWPLSAA
1jmc 3v9x  131  238  829  55.04  15.80
------KVV----PIA-S-L------T--PYQS-----K--W-TIC--AR--V-------
      |      |     |         |  |     |  |          |       
KRNKPGKATGKGKPVGDKWLDDAGKDSGAPIKSFDDFRKAVWEEVSKDPKSSVSKGYSPF
TNKS-QI--R-TWS-NS-R--GE-GKLFSLE-L-V-------D---ES--GEI-RATAFN
| |  |   |              |         |       |   ||       ||   
TPKNQQVGGRKVYELHADKPISQGGEVYDMDNIRVTTPKRHIDIHMESKRNKPGKATGKG
EQV-DKFF---------PL---I-E-V-NKVY--Y--F--------SKG-TL-K-I--AN
  | ||           |    |      |       |        ||   | |     |
KPVGDKWLDDAGKDSGAPIPDRIADKLRDKEFKSFDDFRKAVWEEVSKDPELSKNLNPSN
K----Q-FTA-V-KN-D------YEM-T---FN--NET----SV-M--PCED-D-H----
|            ||        ||           |           |    | |    
KSSVSKGYSPFTPKNQQVGGRKVYELHADKPISQGGEVYDMDNIRVTTPKRHIDIHRGKS
--HLP---T-----V--QF--DF---TG--I-D---D-LENKS-K--DSL---V--DII-
    |   |     |      |     |  | |   | |  |  |  |     |      
KRNKPGKATGKGKPVGDKWLDDAGKDSGAPIPDRIADKLRDKEFKSFDDFRKAVWEEVSK
G--ICKSYEDATKITV-R--S----NNREVAKRNIY-L-MD--TS--GKV-----VTATL
     |      |  |    |     |  |  |  | |  |   |  | |        | 
DPELSKNLNPSNKSSVSKGYSPFTPKNQQVGGRKVYELHADKPISQGGEVYDMDNIRVTT
-WGE-DA-D-KFD--G--S-R-QPV----L--AIK--GA----RVS----D--F-G--G-
     |    |    |       ||    |  | |  ||    |      |  |      
PKRHIDIHESKRNKPGKATGKGKPVGDKWLDDAGKDSGAPIPDRIADKLRDKEFKSFDDF
R-------S----LSV-L--SS-STII-A-NPDIP---E-----AY-----K-L-R-G--
|       |    ||  |  |  |       |  |          |     |     |  
RKAVWEEVSKDPELSKNLNPSNKSSVSKGYSPFTPKNQQVGGRKVYELHADKPISQGGEV
W-FD-----A-----E---GQ
   |               | 
YDMDNIRVTTPKRHIDIHRGK
1jmc 1v15   94  238  501  39.50  18.76
KVVPIASLTPYQSKWTICARVTNKSQIRTWSNSRGEGKLFSLELVDESGEIRATAFNEQV
     |  |      |  |         |    || ||     |   |  |      |  
S----AA-T-IMAA-T--AEYFD-T---TVEELRGPGK--TRALA-QSRQIAMYLCRELT
DKFFPLIEVNKVYYFSKGTLKIANKQFTAVKNDYEMTFNNETSVMPCEDDHHLPTVQFDF
|   |         |          |        ||    |  |     | |   |    
DLSLP--KIGQA--FGRDHTTVMYAQ-RKILS--EMAERRE--VF----D-H---VK-EL
TGIDDLENKSKDSLVDIIGICKSYEDATKITVR--SNNREVAK-RNIYLMDTSGKVVTAT
|        || |   |      | | |    |     |  |  | |  |          
T--TRIRQRSKISAATIMAATAEYFDTTVEELRGPGKTRALAQSRQI-AMYLCRELTDLS
LWGEDADKFDGSRQPVLAIKGARVSDFGGRSLSVLSSSTIIANPDIPEAYKLRGWFDAEG
|       | | |        |         ||              |    |       
L-PKIGQAF-G-RDHT-TVMYAQ-R----KILSEMAERREVFD-HVKE-LTTR--I-RQR
Q
 
S
1jmc 3pvp   47  238  190  19.75  24.74
KVVPIASLTPYQSKWTICARVTNKSQIRTWSNSRGEGKLFSLELVDESGEIRATAFNEQV
   |        |  |       |    |      ||  |  |        | |     |
-YDPF--VR-H-SV-TV--KADRKTAFKTF--L--EG--FP-EWW-PN-NFR-T--T-KV
DKFFPLIEVNKVYYFSKGTLKIANKQFTAVKNDYEMTFNNETSVMPCEDDHHLPTVQFDF
    ||  | |     ||               ||     |      |   |  |  |  
GA--PL-GVDK-----KG-----GR-W------YEI---DEQG----E-E-H--T--FGL
TGIDDLENKSKDSLVDIIGICKSYEDATKITVRSNNREVAKRNIYLMDTSGKVVTATLWG
  |        | ||  ||          |    |  |         |   |        
--IRKVD-E-PDTLV--IG-WR-LNGFGRID-PDNSSEFTV-T-FVAD-GQKKTRVDVEH
EDADKFDGSRQPVLAIKGARVSDFGGRSLSVLSSSTIIANPDIPEAYKLRGWFDAEGQ
   |   |              |  |     |  |       | |     |   |   
THFDRM-GTKH-AKRVRNG-M-D-KGWP-TIL-QS--FQD-KIDE--E--G---AK-K
1jmc 2gkd   46  238  154  19.33  29.87
------------------K-VV-----P-I------A------SL-----T---------
                  |        | |             |      |         
IQNMSLEDIMGERFGRYSKYIIQDRALPDIRDGLKPVQRRILYSMNKDSNTFDKSYRKSA
-----------P------Y----Q-SK-W-T--I----------------CA-RVTN-K-
           |      |      |  |    |                 | | |    
KSVGNIMGNFHPHGDSSIYDAMVRMSQNWKNREILVEMHGNNGSMDGDPPAAMRYTEARL
S-------Q-I--RT----W-----------------S---N-SRG-E-G----------
|       | |   |    |                     | | |   |          
SEIAGYLLQDIEKKTVPFAWNFDDTEKEPTVLPAAFPNLLVNGSTGISAGYATDIPPHNL
-------------------K----L----F--------------------------S---
                   |    |    |                          |   
AEVIDAAVYMIDHPTAKIDKLMEFLPGPDFPTGAIIQGRDEIKKAYETGKGRVVVRSKTE
---L--------------E-----L------------------V-DES---G-----EI-
   |              |     |                  | |||   |     |  
IEKLKGGKEQIVITEIPYEINKANLVKKIDDVRVNNKVAGIAEVRDESDRDGLRIAIELK
R-A-T--A----F--NE-Q-------V--DKF------F-P-------------------
  | |       |     |       |  | |        |                   
KDANTELVLNYLFKYTDLQINYNFNMVAIDNFTPRQVGIVPILSSYIAHRREVILARSRF
--------------L-----I--EV---------------N-KV-Y--------------
              |     |  ||               | || |              
DKEKAEKRLHIVEGLIRVISILDEVIALIRASENKADAKENLKVSYDFTEEQAEAIVTLQ
-Y---------F----S----K--------G---T---L--K----I----A--------
 |                   |        |   |   |  |         |        
LYRLTNTDVVVLQEEEAELREKIAMLAAIIGDERTMYNLMKKELREVKKKFATPRLSSLE
---N---K----Q-F---T-------A----------V---------K--N--D--Y---
   |          |           |          |         |  |  |  |   
NIQNMSLEDIMGERFGRYSKYIIQDRALPDIRDGLKPVQRRILYSMNKDSNTFDKSYRKS
-E-----M-TF-----------------N--N-----E------------------T---
       |  |                 |  |     |                  |   
AKSVGNIMGNFHPHGDSSIYDAMVRMSQNWKNREILVEMHGNNGSMDGDPPAAMRYTEAR
-S-V----M--------P-C---ED-----------------------------D---HH
 |               |      |                             |   | 
LSEIAGYLLQDIEKKTVPFAWNFDDTEKEPTVLPAAFPNLLVNGSTGISAGYATDIPPHN
L-------------PT--V----QF----DF-TG--I---D-------------------
|             ||        |    || ||  |   |                   
LAEVIDAAVYMIDHPTAKIDKLMEFLPGPDFPTGAIIQGRDEIKKAYETGKGRVVVRSKT
--D-L--------------E----------------NK----------S-----------
    |              |                ||          |           
EIEKLKGGKEQIVITEIPYEINKANLVKKIDDVRVNNKVAGIAEVRDESDRDGLRIAIEL
-KD--S-LV--------D--I--------I--------G---ICKSY-------------
 ||    ||        |  |        |        |   |  ||             
KKDANTELVLNYLFKYTDLQINYNFNMVAIDNFTPRQVGIVPILSSYIAHRREVILARSR
-------------E---------D-------AT----------KI----T-------V--
             |         |       |           |     |       |  
FDKEKAEKRLHIVEGLIRVISILDEVIALIRASENKADAKENLKVSYDFTEEQAEAIVTL
---R-SN-------------------------------N------REV------------
   |  |                               |      |||            
QLYRLTNTDVVVLQEEEAELREKIAMLAAIIGDERTMYNLMKKELREVKKKFATPRLSSL
-----A--K---RN-IYLM--DT---S----------------GKVV-T-----A-----
     |  |    |  ||   |    |                |||  |     |     
EKLTPAQSKNPAKNELYLVEGDSAGGSAKQGRDRKFQAILPLRGKVINTAKAKMADILKN
----T-LW----G-----E----------DA--D--------------------------
    |       |     |          ||  |                          
EEINTMIYTIGAGVDFSIEANYDKIIIMTDADTDGAHIQTLLLTFFYRYMRPLVEAGHVY
--------------K----F---D------------G-S--R----------Q-------
              |        |            |    |          |       
IALPPLYKMSKKGKKEEVAYAWTDGELEELRKQFGKGATLQRYKGLGEMNADQLWETTMN
P-------V----L--A---IK---G--A---R--VSD---F------------------
|       |    |  |        |      |    |   |                  
PETRTLIRVTIEDLARAERRVNVLMGDKVEPRRKWIEDNVKFTKLTPAQSKNPAKNELYL
-------G----G--R---S---L------------S-VL-S---SS---TI-------I
       |    |  |       |               |          ||       |
VEGDSAGGSAKQGRDRKFQAILPLRGKVINTAKAKMADILKNEEINTMIYTIGAGVDFSI
-AN------------------------------P--D-----I---P-----------E-
 ||                              |        |   |           | 
EANYDKIIIMTDADTDGAHIQTLLLTFFYRYMRPLVEAGHVYIALPPLYKMSKKGKKEEV
AY---------------K---L-R----G-------W---------------F-D---AE
||               |   | |    |       |                 |   ||
AYAWTDGELEELRKQFGKGATLQRYKGLGEMNADQLWETTMNPETRTLIRVTIEDLARAE
-------G----------Q------
       |                 
RRVNVLMGDKVEPRRKWIEDNVKFT
1jmc 3k9f  171  238 1405  71.85  12.17
-KV--V-PI-ASLT---PYQS----------K--WT---I-C-A-R--VTNK-----SQI
          |  |      |             ||   |          |      | |
LQIEFITDLGARVTVNVEHESRLLDVQRHYGRLGWTSGEIPSGGYQFPIENEADFDWSLI
--RTWSNSRG-E-----G-----K-L--F-S--LEL-----------V-D-----E-S-G
  | |    | |     |       |    |  | |           | |     |   |
GARKWKSPEGEELVIHRGHAYRRRELEAVDSRKLKLPAAIKYSRGAKVSDPQHVREKADG
EIR-AT-A-F--NEQVDKF-FP-L-IE----------VN-----K---V---Y-------
 |     | |           | | ||          ||         |   |       
DIEYVSLAIFRGGKRQERYAVPMLQIEFITDLGARVTVNVEHESRLLDVQRHYGRLGWTS
-------Y---------F--S-------K---G-TLKI----A--NKQF---TAV-----
       |         |  |       |   |  | |    |          |      
GEIPSGGYQFPIENEADFDWSLIGARKWKSPEGEELVIHRGHAYRRRELEAPAAIKYSRG
-K-ND---------Y-EMT-F----NNET-SV-M-PCE---D---------DH--HLPTV
 |  |         |     |      |   | |   |   |          |   |  |
AKVSDPQHVREKIEYVSLAIFRGGKRQERYAVPMLQIEFITDLGARVTVNVEHESRLLDV
Q--F---DFT-G-I-D---D--LENKSK-D-SLV---D--II--G---------I-----
|        | | |         ||    | ||        |  |         |     
QRHYGRLGWTSGEIPSGGYQFPIENEADFDWSLIGARKWLVIHRGHAYRRRELEIKYSRG
CK-S---Y--EDATKITV-RSNNR-E---V------------AK-R-NI-Y---LMD---
 | |      |        |   | |   |            |    |      | |   
AKVSDPQHVREEYVSLAIFRGGKRQERYAVPMLQIEFITDLGARVTVNVEHESRLLDVQR
-------TSGKV--------V-T-A----TL-----W----GED-------A--D-KFD-
       |||              |     |     |    ||        |    |   
HYGRLGWTSGEIPSGGYQFPIENEADFDWSLIGARKWKSPEGEELVIHRGHAYRRIKYSR
G--S--------RQ-----P-VLAIK-----GAR----V---S---D----FG--G-RS-
|  |        ||     |  | |      |||    |   |   |     |  |  | 
GAVSLAIFRGGKRQERYAVPTMLQIEFITDLGARVTVNVEHESRLLDVQRHYGRLGWTSG
-L-S----V-L-S-S--S-TII-A----NP---D--I--PEAY-------------KL--
   |                 | |     |      |    ||             ||  
EIPSGGYQFPIENEADFDWSLIGARKWKSPEGEELVIHRGHAYRRRELEAVDSRKLKLPA
-----RG-WFD-A--E-G--Q-------
     ||     |    |  |       
AIKYSRGEYVSLAIFRGGKRQERYAVPG
1jmc 4hqb  117  238  628  49.16  18.63
KVVPIASLTPYQSKWTICARVTNKSQIRTWSNSRGEGKLFSLELVDESGEIRATAFNEQV
   |                 |    |        ||     |      |  ||      
S-DPVRQYL-HEI-GQV-PLLTLEEEI-DLARKVEEG----MEAIKKLSE--ATGLDQEL
DKFFPLIEVNKVYYFSKGTLKIANKQFTAVKNDYEMTFNNETSVMPCEDDHHLPTVQFDF
          |      ||  |  |     |   |      | |   |       |  | 
IR--EVVRA-KI--L--GTARI-QK-IPGLK---EKP-DPKT-V---E-E-----V--D-
TGIDDLENKSKDSLVDIIGICKSYEDATKITVRSNNREVAKRNIYLMDTSGKVVTATLWG
 |   |    |  |     |    | |       | | |    |    | |      |  
-G--KLKSLPKE-LKRYLHIAREGEAARQHLIEANLRLVV--SIAKKYT-GRGL-SFL--
EDADKFDGSRQPVLAIKGARVSDFGGRSLSVLSSSTIIANPDIPEAYKLRGWFDAEGQ
 |     |  |  | |  | |  |          ||  |   |  |   |   |    
-DLIQ-EGN-QG-L-IR-A-VEKFEYKR-R-FKFST-YATWWIRQAIN-RAIAD-QAR
1jmc 3ugo   50  238  179  21.01  27.93
------K---V--------V---P----IA--SL-T--PY----------QSKW--TI--
      |   |        |   |     |   | |              |  |      
ASRGVNKVILVGNLGQDPEVRYMPNGGAVANITLATSESWRDKATGEMKEQTEWHRVVLF
--CARV-T---NK-SQ--I----RT--WSN-S---R--GE------G--K-LFS--L-E-
   | |      | ||  |    ||  |   |   |   |      |    | |      
GKLAEVASEYLRKGSQVYIEGQLRTRKWTDQSGQDRYTTEVVVNVGGTMQMLASRGVNKV
-LV-----D-E-----S-G---EIR-ATAFN-EQVD--K--FF-PL--I--E-VNK---V
 ||     | |       |    |  ||    ||        |  |     |   |   |
ILVGNLGQDPEVRYMPNGGAVANITLATSESWEQTEWHRVVLFGKLAEVASEYLRKGSQV
YYFSK-GTLKIANK--Q--F-T-AVKN---DYEM---TFN-NETSVM-PC-ED-D-HHLP
|      | |      |    |  | |      |       |          |      |
YIEGQLRTRKWTDQSGQDRYTTEVVVNVGGTMQMLGASRGVNKVILVGNLGQDPEVRYMP
--------TV---Q-F-D-FTG-I-DDLE-NK----SK--D--S--L---VDI-I-G-I-
        |        |  ||      |        |     |  |       | |   
NGGAVANITLATSESWRDKATGEMKEQTEWHRVVLFGKLAEVASEYLRKGSQVYIEGQLR
C-K----SYED--ATKITVR-SNNRE-VAKR--N-IYL---M--D--T----S-GKV--V
  |    |  |   |   |         | |  |   |      |         | |   
TRKWTDQSGQDRYTTEVVVNVGGTMQMLASRGVNKVILVGNLGQDPEVRYMPNGGAVANI
T-AT--LWGEDADKFDGS-RQPVLAIKGARV-SDF---GGR-SL-SVL-SSS-TIIANPD
| ||   |   | |        ||  | | | |     |        |     |     |
TLATSESWRDKAMKEQTEWHRVVLFGKLAEVASEYLRKGSQVYIEGQLRTRKWTDQSGQD
--IPE-AYKLRGWFD-AEGQ
    |      |      | 
RYTTEVVVNVGGTMQMLGGR
1jmc 1eyg   91  238  440  38.24  20.68
-K--V-V-PIA-SLTP-Y--QS-K-------W--TI---C---A--R-V--TN----K--
                 |     |          |    |            |    |  
DEFYISIETVGNNIVERYIDENGKERTREVEYLPTMFRHCKEESKYKDIYGKNCAPQKFP
S-Q-IRTW-SNSR--G-E--G----KL-F-S--L--EL--------V---D-E-SG----
|    | |       | |  |    ||   |     |         |   | |  |    
SMKDARDWMKRMEDIGLEALGMNDFKLAYISDTYGSEIVYDRKFVRVANCDIEVTGDKFP
-------EIRA-T---A-------F---N-----------------------E--Q-V-D
       || | |           |   |                       |  |   |
DPMKAEYEIDAITHYDSIDDRFYVFDLLNSMYGSVSKWDAKLAAKLDCEGGDEVPQEILD
K--FFP-------LIE-VN----K---VY--Y----F------S--K---G--TLK----
     |       | |  |    |            |         |   |    |    
RVIYMPFDNERDMLMEYINLWEQKRPAIFTGWNIEGFDVPYIMNRVKMILGERSMKRFSP
I----A----N----KQ-FT--AVK--N--D-Y-E--MT----F---N---NET---SV-
|         |    |       |      | |     |    |        ||      
IGRVKSKLLQNMYGSKEIYSIDGVSILDYLDLYKKFAFTNLPSFSLESVAQHETKKGKLP
M--P---C-EDDH-----H--L--PTVQ-FD-FTG-ID-DLE-N---K-------S--K-
   |     |  |             ||  |   | ||  |      |       |  | 
YDGPINKLRETNHQRYISYNIIDVESVQAIDKIRGFIDLVLSMSYYAKMPFSGVMSPIKT
-D-----SL--VD---I-I---G--ICKSY--E---DATK-I----TV-R-----SN---
 |     ||   |   | |   |  |   |  |     |       |  |      |   
WDAIIFNSLKGEDEFYISIETVGNNIVERYIDENGKERTREVEYLPTMFRHCKEGKNCAP
NR--EV--A----KR--N---I-YLMDTSG-------K---V------VT----------
        |    ||  |     |  || |       |   |      ||          
QKFPSMKDARDWMKRGMNDFKLAYISDTYGSEIVYDRKFVRVANCDIEVTGDKFPDPMKA
-----A-T--------------L---------W------------G-E---D-ADK----
     | |              |         |            | |      |     
EYEIDAITHYDSIDDRFYVFDLLNSMYGSVSKWDAKLAAKLDCEGGDEVPQEILDRVIYM
-FDGSR-----------Q--P-VL-A--IKG--A-----RV-------S-D-FG--GR--
 ||  |           |  |       | |        ||       |   |   ||  
PFDNERDMLMEYINLWEQKRPAIFTGWNIEGFDVPYIMNRVKMILGERSMKRFSPIGRVK
S-LS--VLS----S-----------S-T------I--IA-N-------P-D--I-P--E-
| ||    |    |             |          |         | |  |    | 
SKLSKEIYSIDGVSILDYLDLYKKFAFTNLPSFSLESVAQHETKKGKLPYDGPINKLRET
------AY------------KLRGWFD--------AE----G-----Q----------
       |            | ||  |        |     |                
NHQRYISYNIIDVESVQAIDKIRGFIDLVLSMSYYAKMPFSGVMSPIKTWDAIIFNSL
1jmc 1noy  125  238  718  52.52  17.41
K--VVPI--ASLTPYQSK--W-TIC-AR--V-TN--K---S-QI--RT-W-SNSRGEG--
|   |    ||||  |          |     ||      |  |   |       | |  
KYEYVELAKASLTSAQPQHFYAVVIDATFPYKTNQERYICSLKIVDPTLYLKQQKGAGDA
K------LFS--LE-L--VDESGE-I---RAT--AFN-E-QVD-K-FF----PL------
       |     | |      |  |   |||    |   |     |      |      
SDYATLVLYAKRFEDLPIIHRAGDIIRVHRATLRLYNGQRQFNANVFYSSSWALFSTDKR
-I--EV-NK--V-----YYF-SK-GTL-K--IA---N--K---Q-F-----------T--
    |  |   |       | ||  |  |  |    |  |   | |           |  
SVTQEINNQDAVSDTTPFSFSSKHATIEKNEISILQNLRKWANQYFSSYSVISSDMYTAL
----A-------V-K----N--D-Y--E--M---------T------F------------
    |       | |       | |  |            |      |            
NKAQAQKGDFDVVAKILQVHELDEYTNELKLKDASGQVFYTLSLKLKFPHVRTGEVVRIR
N---NETS----V--M-------------P-C-E------DDH-----------------
     |||    |                    |      |||                 
SATYDETSTQKKVLILSHYSNIITFIQSSKLAKELRAKIQDDHSVEVASLKKNVSLNAVV
-------H--LP-T-VQ--F------------D-----F--TGID--DL-E-----N-KS
       |  || |  |  |            |     |  | |   |  |       | 
LTEVDKKHAALPSTSLQDLFHHADSDKELQAQDTFRTQFYVTKIEPSDVKEWVKGYDRKT
-K-DSL--V----D-I--IG-ICK--S------------Y-ED---ATKITVRS-N---N
 |  ||       | |       |  |            |  |   |    |   |   |
KKSSSLKGASGKGDNIFQVQFLVKDASTQLNNNTYRVLLYTQDGLGANFFNVKADNLHKN
---R-------E--------V-A---KRN-IYLM-DT-------SG-KVVTATLW-GE-D
   |       |        | |    ||  ||  ||       |  |     |   | |
ADARKKLEDSAELLTKFNSYVDAVVERRNGFYLIKDTKLIYQQQSAFKQLYTELFNNEGD
-----AD---------K-----F---DG--------SR----Q-----P-V-LA-I--K-
                |     |   ||                    | |       | 
FSKVSSNLKKPLKCYVKESYPHFLVTDGYFFVAPYFTKEAVNEFHAKFPNVNIVDLTDKV
----G-A----RV-S-D-F----G--GR----S--------L--S---V-L----S-SST
           || |   |        |    |        |      | |        |
IVINNWSLELRRVNSAEVFTSYANLEARLIVHSFKPNLQERLNPTRYPVNLFRDDEFKTT
I-------I--A-N-----P---DI---PE-A--Y-K----L------RG-WF-D-A--E
|          | |         ||      |    |            |  | |    |
IQHFRHTALQAAINKTVKGDNLVDISKVADAAGKKGKVDAGIVKASASKGDEFSDFSFKE
G------------Q---
|            |   
GNTATLKIADIFVQEKG
1jmc 2i0q  128  238  677  53.78  18.91
KVVPIASLTPYQSKWTICARVTNKSQIRTWSNSRGEGKLFSLELVDESGEIRATAFNEQV
         |                       ||   | |    |   | |  |   | 
---------P-----------------------RGSA-L-S----D-T-E-R--A---QL
DKFFPLIEVNKVYYFSKGTLKIANKQFTAVKNDYEMTFNNETSVMPCEDDHHLPTVQFDF
|    |  |      |    ||                           |   | |    
D-VMKLLNVS-LHEMSR---KISRSRH-CIR----V-Y------L--K-D---P-V--SY
TGIDDLENKSKDSLVDIIGICKSYEDATKITVRSNNREVAKRNIYLMDTSGKVVTATLWG
 |       ||               |    ||    |   ||            |    
-G-----T-SK-R-AP-----RR-K-A--LSVR--D-E---RNV-I-----R--AAS---
EDADKFDGSRQPVLAIKGARVSDFGGRSLSVLSSSTIIANPDIPEAYKLRGWFDAEGQ
    |    |     |   |        ||  |  ||  |       | |      | 
NSC-K-T-ARD----I---R-NEL--Q-LSA-SKRTIL-N--V---IK-R----S-G-
1jmc 1u78   42  238  103  17.65  40.78
------------K-V-------V-P----IAS-L--T-P-Y-Q--S--------------
                      | |    ||  |    |   |  |              
MNELVDTTEMYLRTIYDLEEEGVTPLRARIAERLDQSGPTVSQTVSRMERDGLLRVAGDR
-----------------K---------------W-TI----C------A-----R---V-
                 |               |       |            |   | 
HLELTEKGRALAIAVMRKHRLAERLLVDVIGLPWEEVHAEACRWEHVMSEDVERRLVKVL
----T----N-------------K-------S-------Q----IR------T-W--S--
    |    |                     |       |            |       
NNPTTSPFGNPIPGLDELGVGLVRLTELPAGSPVAVVVRQLTEHVQGDIDLITRLKDAGV
--NSR----------------G--------E---G----K----L------F--S---L-
  | |                |        |        |    |             | 
VPNARVTVETTPGGGVTIVIPGHENVTLPHEMAHAVKVEKVMNELVDTTEMYLRTIYDLE
-E----L---V----DESG----------E----IR-A-------T--------------
 |    |        | ||          |     | |       |              
EEGVTPLRARIAERLDQSGPTVSQTVSRMERDGLLRVAGDRHLELTEKGRALAIAVMRKH
---------------------A--------------------------F-N---------
                     |                          | |         
RLAERLLVDVIGLPWEEVHAEACRWEHVMSEDVERRLVKVLNNPTTSPFGNPIPGLDELG
-------E------------Q----V----D-----K---------------------F-
       |            |    |    |     |                       
VGLVRLTELPAGSPVAVVVRQLTEHVQGDIDLITRLKDAGVVPNARVTVETTPGGGVTIV
FP------L---------IE-V-NK-V-----Y----Y-F-SKG-T-L--KIA---NK--
 |      |          | | |  |     |    |     | | |   ||       
IPGHENVTLPHEMAHAVKVEKVMNELVDTTEMYLRTIYDLEEEGVTPLRARIAERLDQSG
----Q--------------------FT--------AV--KN--------D----------
    |                     |        ||  |         |          
PTVSQTVSRMERDGLLRVAGDRHLELTEKGRALAIAVMRKHRLAERLLVDVIGLPWEEVH
-----YE--M----------------T--F-N----------------------------
      |  |                |  | |                            
AEACRWEHVMSEDVERRLVKVLNNPTTSPFGNPIPGLDELGVGLVRLTELPAGSPVAVVV
------------------------N--------------------E--T-----------
                        |                    |  |           
RQLTEHVQGDIDLITRLKDAGVVPNARVTVETTPGGGVTIVIPGHENVTLPHEMAHAVKV
----S--V----M--------------P-----C-----------------E-D------
       |    |              |                       | |      
EKVMNELVDTTEMYLRTIYDLEEEGVTPLRARIAERLDQSGPTVSQTVSRMERDGLLRVA
-D-H-----------------H------------LP---------------T--VQ----
 | |                 |            ||                  |     
GDRHLELTEKGRALAIAVMRKHRLAERLLVDVIGLPWEEVHAEACRWEHVMSEDVERRLV
----------F-------D--------FT----G-------------I--D-D----L--
          |       |         |    |                | |    |  
KVLNNPTTSPFGNPIPGLDELGVGLVRLTELPAGSPVAVVVRQLTEHVQGDIDLITRLKD
--------------------------EN-----------K-SK-----------------
                          ||           |  |                 
AGVVPNARVTVETTPGGGVTIVIPGHENVTLPHEMAHAVKVEKVMNELVDTTEMYLRTIY
------------------D----------S-------L-V--D-------------I---
                  |          |       | |  |             |   
DLEEEGVTPLRARIAERLDQSGPTVSQTVSRMERDGLLRVAGDRHLELTEKGRALAIAVM
-------------IG-----I----C---------------K-------S-Y--------
             ||          |               |       |          
RKHRLAERLLVDVIGLPWEEVHAEACRWEHVMSEDVERRLVKVLNNPTTSPFGNPIPGLD
E---------D--A-T------K-IT--V--------R---SN---N-R-----------
|            |           |  |        |        | |           
ELGVGLVRLTELPAGSPVAVVVRQLTEHVQGDIDLITRLKDAGVVPNARVTVETTPGGGV
-------E-V--------A-K--R--N------------IY---------L-------MD
       | |        | |     |            ||         |        |
TIVIPGHENVTLPHEMAHAVKVEKVMNELVDTTEMYLRTIYDLEEEGVTPLRARIAERLD
--------T-S-----G--KV-------VT----------------A------T--L---
        | |     |   |        |                |         |   
QSGPTVSQTVSRMERDGLLRVAGDRHLELTEKGRALAIAVMRKHRLAERLLVDVIGLPWE
--------W-----------------------------------------------G---
        |                                               |   
EVHAEACRWEHVMSEDVERRLVKVLNNPTTSPFGNPIPGLDELGVGNLVRLTELPAGSPV
--------E-------------D-------------------------------------
        |             |                                     
AVVVRQLTEHVQGDIDLITRLKDAGVVPNARVTVETTPGGGVTIVIPGHENVTLPHEMAH
A-----------D------K--FD----G--------S-R--Q--P--------------
|           |          |    |          |  |  |              
AVKVEKVMNELVDTTEMYLRTIYDLEEEGVTPLRARIAERLDQSGPTVSQTVSRMERDGL
--V--------------LAI----K------------G---------A-R---V-S-D--
  |              |||    |            |         | |   | | |  
LRVAGDRHLELTEKGRALAIAVMRKHRLAERLLVDVIGLPWEEVHAEACRWEHVMSEDVE
--------------F----------G-G--R-------S--------LS--V--------
              |          | |  |       |        |   |        
RRLVKVLNNPTTSPFGNPIPGLDELGVGLVRLTELPAGSPVAVVVRQLTEHVQGDIDLIT
-L-----------S--SS-----TI-I-A--N---P------------------------
 |                     || |    |   |                        
RLKDAGVVPNARVTVETTPGGGVTIVIPGHENVTLPHEMAHAVKVEKVMNELVDTTEMYL
----D------------I--------P---------E-------A---Y-----------
    |            |        |         |       |               
RTIYDLEEEGVTPLRARIAERLDQSGPTVSQTVSRMERDGLLRVAGDRHLELTEKGRALA
-----K--L--R------G------------W-----------------------F----
     |  |  |      |            |                       |    
IAVMRKHRLAERLLVDVIGLPWEEVHAEACRWEHVMSEDVERRLVKVLNNPTTSPFGNPI
---------------------------------------------D------A----E--
                                             |      |    |  
PGLDELGVGNLVRLTELPAGSPVAVVVRQLTEHVQGDIDLITRLKDAGVVPNARVTVETT
----------G----------------Q--
          |                   
PGGGVTIVIPGHENVTLPHEMAHAVKVEKV
1jmc 1u8r  175  238 1770  73.53   9.89
-----KV---VP-I-AS--------L--T----P---YQ-SKW--TIC-------A----
     ||      | ||        |       |   |        ||       |    
MVDMSKVKLRIENIVASVDLFAQLDLEKVLDLCPNSKYNPEEFPGIICHLDDPKVALLIF
---R--VTN-KS-Q-I-RTWSN-S-R-GE-GKLFS-L-EL-VDE---SGEI-R-------
      ||  || | | |            |  |       |     || | |       
SSGKLVVTGAKSVQDIERAVAKLAQKLKSIGVKFKRAPQIDVQNMVFSGDIGREFNLDVV
A-TAFN-EQVDKFFP-LI-EV-N-K-V-YYFSKGTLKIAN-K-Q---FTAV-K---N-D-
| |  | |     ||  |  |   | |   || |       |       || |     | 
ALTLPNCEYEPEQFPGVIYRVKEPKSVILLFSSGKIVCSGAKSEADAWEAVRKLLRELDK
YEMTFNNETSV-MP-CE-D--D-H-HLPT-VQFD----F-TGI-DDL-ENKSKDS-LVD-
|      |        | |       ||  |               |    |  |     
YMVSDAAERNLAFALSELDRITAQLKLPRHVEEEAARLYREAVRKGLIRGRSIESVMAAC
IIGICKSYE-DAT--KIT-V-RSNNREVAK--RNIYL-MD-TSGKV-VTATLW-GEDADK
    |       |   |    |    |     | |      |  |  |  |      || 
VYAACRLLKVPRTLDEIADIARVDKKEIGRSYRFIARNLNLTPKKLFVKPTDYVNKFADE
FDG-S----RQ--PVL--AIK-G--ARVSDFG--GRSL---SVL-SSS-T---I--IAN-
  | |    |     |  | | |     |  |     |   | |     |       |  
L-GLSEKVRRRAIEILDEAYKRGLTSGKSPAGLVAAALYIASLLEGEKRTQREVAEVARV
PDIP--EAYK-L-RGW-FDAEGQ
        || |           
TEVTVRNRYKELVEKLKIKVPIA
1jmc 1d3u   83  238  382  34.87  21.73
--KV--V-------PI-ASL---T--PYQSKW--T---I---C--A--R-VTNK-SQ---
   |  |            |      |    |      |   |       |  |      
LLTVDAVLFTYHDQQLKVLLVQRSNHPFLGLWGLPGGFIDETCDESLEQTVLRKLAEKTA
-----I-R--T-WSNSR-GEG-K-------L--F-S--LEL--V-D-E--S-GEI-R-AT
     |    |   |||   |         |            | |              
VVPPYIEQLCTVGNNSRDARGWSVTVCYTALMSYQACQIQIASVSDVKWWPLADVLQMPL
AF-N----EQV-D----K--F-F-P---LIE---VNKVYYFSKGTL-K-IANKQF-TAVK
||      ||       |      |   | |              | | |  | |   | 
AFDHLQLIEQARERLTQKALYSLVPGFALSEPFTLPELQHVHEVLLGKPIQGKSFRRRVE
N-DYEM-T-F-NNETS--V-MPC-E-D--DHH-LPTV-Q-F--D---FTGID-DLE----
  |    |     |        |   |      |    |    |   ||  |  |     
QADLLIDTGLKRTERGRPANLYCLKPDTASYRFLRNLEQLLTVDAVLFTYHDQQLKVLLV
NKSKDSLVDI--I--G-I---C-KSYEDAT--KI---T--V-----R--S--NN-REV-A
  |            | |   |  | |     |    |  |           || |    
QRSNHPFLGLWGLPGGFIDETCDESLEQTVLRKLAEKTAVVPPYIEQLCTVGNNSRDARG
-KRNI-Y--LMDTSG-KV-V-TAT-L--WG-ED------A-D--K-FD-G-SR--QPVL-
      |  ||                 |   |      | |          |  |  | 
WSVTVCYTALMSYQACQIQIASVSDVKWWPLADVLQMPLAFDHLQLIEQARERLTQKALY
A-IKGARVSD-F--GG-RSL-SV-L----SSSTI---IANPD--IPEAYK-L-RG-----
    |   |  |          | |                |  |    |   ||     
SLVPGFALSEPFTLPELQHVHEVLLGKPIQGKSFRRRVEQADLLIDTGLKRTERGRPANL
W-F--D-A-----EG-Q
     | |         
YCLKPDTASYRFLRNLE
1jmc 3gz6   78  238  437  32.77  17.85
--------------------------------K---V--------V-P--IA-----S--
                                |            | |         |  
PRRAPAFPLSDIKAQMLFANNIKAQQASKRSFKEGAIETYEGLLSVDPRFLSFKNELSRY
LT---P---------Y----Q-S----K-----------W--------------------
||   |         |                       |                    
LTDHFPANVDEYGRVYGNGVRTNFFGMRHMNGFPMIPATWPLASNLKKRADADLADGPVS
---------------T--------I------C----------------------------
                        |      |                            
ERDNLLFRAAVRLMFSDLEPVPLKIRKGSSTCIPYFSNDMGTKIEIAERALEKAEEAGNL
-----------------------------A--------------R--------VT-----
                             |              |        ||     
MLQGKFDDAYQLHQMGGAYYVVYRAQSTDAITLDPKTGKFVSKDRMVADFEYAVTGGEQG
-----NK--S----Q---------------------------I-------R---------
      |  |    |                           |       |         
SLFAASKDASRLKEQYGIDVPDGFFCERRRTAMGGPFALNAPIMAVAQPVRNKIYSKYAY
-----T----------WS-----N-S-R-----G--------E----G------KLF---
     |          ||       |       |        |    |      |||   
TFHHTTRLNKEEKVKEWSLCVATDVSDHDTFWPGWLRDLICDELLNMGYAPWWVKLFETS
----------------------S---LE----------------------LV--------
                      |   ||                      ||        
LKLPVYVGAPAPEQGHTLLGDPSNPDLEVGLSSGQGATDLMGTLLMSITYLVMQLDHTAP
-------D--------ES---G--EIR-------A----T--------------------
       |         |   |  |||       |    |                    
HLNSRIKDMPSACRFLDSYWQGHEEIRQISKSDDAMLGWTKGRALVGGHRLFEMLKEGKV
-------------------------------A-F---------N----E---Q--V-D--
                               | |         |    |   |  | |  
NPSPYMKISYEHGGAFLGDILLYDSRREPGSAIFVGNINSMLNNQFSPEYGVQSGVRDRS
--K--F-----------F---PL---I-E-V-----N--------------K-----V--
  |  |               |      |       |              |        
KRKRPFPGLAWASMKDTYGACPIYSDVLEAIERCWWNAFGESYRAYREDMLKRDTLELSR
Y----------------------------Y-F-----S----K----G-----T------
|                            |       |         |     |      
YVASMARQAGLAELTPIDLEVLADPNKLQYKWTEADVSANIHEVLMHGVSVEKTERFLRS
------------L---K---I-A-N-K--Q-----F------T-----AV-------KN-
            |   |     | | |  |     |      |      |       || 
VMPRPRRAPAFPLSDIKAQMLFANNIKAQQASKRSFKEGAIETYEGLLSVDPRFLSFKNE
------D-Y-----E--------M-T--F-----N-------------N-----------
      |       |          |  |     |             |           
LSRYLTDHFPANVDEYGRVYGNGVRTNFFGMRHMNGFPMIPATWPLASNLKKRADADLAD
----E-------TSV--M-------P---------C-----------------------E
    |         |  |       |         |                       |
GPVSERDNLLFRAAVRLMFSDLEPVPLKIRKGSSTCIPYFSNDMGTKIEIAERALEKAEE
----------DD----H---------H---------L-P-T----------------V--
          ||    |                   | | |                |  
AGNLMLQGKFDDAYQLHQMGGAYYVVYRAQSTDAITLDPKTGKFVSKDRMVADFEYAVTG
--Q---F------------------D--F-----T---G------------------I--
  |   |                  |  |     |   |                  |  
GEQGSLFAASKDASRLKEQYGIDVPDGFFCERRRTAMGGPFALNAPIMAVAQPVRNKIYS
--------------------------------D--------DL---E--N--------K-
                                |        ||   |  |        | 
KYAYTFHHTTRLNKEEKVKEWSLCVATDVSDHDTFWPGWLRDLICDELLNMGYAPWWVKL
---S-K------------------D-S---L-V---------DIIG--------------
   | |                  | |   | |         |  |              
FETSLKLPVYVGAPAPEQGHTLLGDPSNPDLEVGLSSGQGATDLMGTLLMSITYLVMQLD
---------I------CK---SY-----E--------DA----T----------------
         |      |    ||     |        ||    |                
HTAPHLNSRIKDMPSACRFLDSYWQGHEEIRQISKSDDAMLGWTKGRALVGGHRLFEMLK
----------KIT----------V------R------------S--NNR---E------V
          ||                  |            |  ||    |      |
EGKVNPSPYMKISYEHGGAFLGDILLYDSRREPGSAIFVGNINSMLNNQFSPEYGVQSGV
---------------A--K-----------------R---N-I------Y----------
               |  |                 |   |        |          
RDRSKRKRPFPGLAWASMKDTYGACPIYSDVLEAIERCWWNAFGESYRAYREDMLKRDTL
-L------M------------------D--------T----S---------G----K---
 |      |                  |        |    |         |    |   
ELSRYVASMARQAGLAELTPIDLEVLADPNKLQYKWTEADVSANIHEVLMHGVSVEKTER
----V------------------------------------------------V------
    |                                                |      
FLRSVMPRPRRAPAFPLSDIKAQMLFANNIKAQQASKRSFKEGAIETYEGLLSVDPRFLS
---------T----A--------------T-------------L---W------------
         |    |              |                 |            
FKNELSRYLTDHFPANVDEYGRVYGNGVRTNFFGMRHMNGFPMIPATWPLASNLKKRADA
----G---E-D------A----------------------------D-------------
    |   | |      |                            |             
DLADGPVSERDNLLFRAAVRLMFSDLEPVPLKIRKGSSTCIPYFSNDMGTKIEIAERALE
------------KF-D--------GS-----R-Q--------P-----------------
            || |        |      | |        |                 
KAEEAGNLMLQGKFDDAYQLHQMGGAYYVVYRAQSTDAITLDPKTGKFVSKDRMVADFEY
-V-------L------A--IK---------------------G-----------------
 |       |      |   |                     |                 
AVTGGEQGSLFAASKDASRLKEQYGIDVPDGFFCERRRTAMGGPFALNAPIMAVAQPVRN
------A-------R-----------------VS--D-F--G-------------G----
      |       |                 ||  | |  |             |    
KIYSKYAYTFHHTTRLNKEEKVKEWSLCVATDVSDHDTFWPGWLRDLICDELLNMGYAPW
--R----S------------------L---S-----V-LSS-------------S-T--I
       |                  |   |     | |||             | |   
WVKLFETSLKLPVYVGAPAPEQGHTLLGDPSNPDLEVGLSSGQGATDLMGTLLMSITYLV
--I---A---N------P------D-----------I-----------------------
      |   |      |      |           |                       
MQLDHTAPHLNSRIKDMPSACRFLDSYWQGHEEIRQISKSDDAMLGWTKGRALVGGHRLF
-----------P-----------------------E---A-----------------Y--
           |                       |   |                 |  
EMLKEGKVNPSPYMKISYEHGGAFLGDILLYDSRREPGSAIFVGNINSMLNNQFSPEYGV
----------K-----L-----R---G----------------W--F-------------
          |     |         |                |  |             
QSGVRDRSKRKRPFPGLAWASMKDTYGACPIYSDVLEAIERCWWNAFGESYRAYREDMLK
-------------------------------------------D--A---E----G----
                                           |  |   |    |    
RDTLELSRYVASMARQAGLAELTPIDLEVLADPNKLQYKWTEADVSANIHEVLMHGVSVE
--Q---------
            
KTERFLRSVMPR
1jmc 1hht  198  238 1992  83.19   9.94
KVVPIASL-TPYQSKWTI-CARVTNKSQIRTWSNSRG---EGKLFSLELVDESGEIRATA
       | |           |       |      |          | ||  |      
ILKELQALNTEEAAEQRAEVDRMLSEDPWRAAKMIKGYMQQHNIPQREVVDVTG-LNQSH
FNEQVDKFFPL-IEVN-KVY--YFSK--GTLK-----I--AN--K------Q--FTAV--
      |  |         |  |  |    |          |  |      |    |   
LSQHLNKGTPMKTQKRAALYTWYVRKQREILRQFNQTVMRRNRFKWGPASQQILYQAYDR
-KN----DYE-MT--FNN-E---TSVMP--CED-DHHLPT-VQ-FD-FTG--IDD---L-
 ||      |      |  |     | |         | | |     |          | 
QKNPSKEEREALVEECNRAECLQRGVSPSKAHGLGSNLVTEVRVYNWFANRRKEEASILK
E-N--KSKDSLVDIIGICKSY-ED---ATK-IT--VRSNN---REVAK-R--N-IYL-MD
|                     ||   | | |       |   |||      |   |   
ELQALNTEEAAEQRAEVDRMLSEDPWRAAKMIKGYMQQHNIPQREVVDVTGLNQSHLSQH
-TSG-KVVT---ATL--W-----GE-----D---ADKFD-G-SRQPVL--AI---KG-A-
   |    |   | |  |      |            |  |   |  |  |    |    
LNKGTPMKTQKRAALYTWYVRKQREILRQFNQMRRNRFKWGPASQQILYQAYDRQKNPSK
--R---VSDFG-GRSLS-VLSSSTIIA-NPDIPEAYKLRGWF-D---AEG-Q
  |   |        |    | |                 ||      |   
EEREALVEECNRAECLQRGVSPSKAHGLGSNLVTEVRVYNWFANRRKEEAFR
1jmc 2h8r   63  238  351  26.47  17.95
K---V--VPI--A-----S---LTPY-------QSKW-T--ICA-R-----V---T----
       |    |     |   |||        ||      |   |     |   |    
RDSLIFLVDASKAMFESQSEDELTPFDMSIQCIQSVYISKIISSDRDLLAVVFYGTEKDK
---N-KS----Q---------I-------------R-------------T---W------
   | |     |         |             |                 |      
NSVNFKNIYVLQELDNPGAKRILELDQFKGQQGQKRFQDMMGHGSDYSLSEVLWVCANLF
-------S---------------N-----S--R---G---E-G---------K-------
       |               |     |  |   |     |         |       
SDVQFKMSHKRIMLFTNEDNPHGNDSAKASRARTKAGDLRDTGIFLDLMHLKKPGGFDIS
L---------F---S-LE--L--V-------------------D-E-S-G-----E----
|         |   | ||  |  |                   |   | |          
LFYRDIISVHFEESSKLEDLLRKVRAKETRKRALSRLKLKLNKDIVISVGIYNLVQKALK
---I---R-------A-T-AFN---------------E-----Q-V-------D-K-F--
   |   |         |  ||                     |           | |  
PPPIKLYRETNEPVKTKTRTFNTSTGGLLLPSDTKRSQIYGSRQIILEKEETEELKRFDD
-------F-------------P-L-I---E--V-------N--------K-V-----Y--
       |             | |     |  |                | |     |  
PGLMLMGFKPLVLLKKHHYLRPSLFVYPEESLVIGSSTLFSALLIKCLEKEVAALCRYTP
------YF-S-----------K------G---T-LKIA-NK-Q--F------T-------
      ||             |      |     |  |  |    |      |       
RRNIPPYFVALVPQEEELDDQKIQVTPPGFQLVFLPFADDKRKMPFTEKIMATPEQVGKM
-A-V-K------ND-YE---M-T-F-N------N----E-----T------------S-V
 | | |       |  |       | |           |     |            | |
KAIVEKLRFTYRSDSFENPVLQQHFRNLEALALDLMEPEQAVDLTLPKVEAMNKRLGSLV
-----M---P---------CED-----DHH---L--P--------T--V--Q-F----D-
         |         | |              |        |  |  | |    | 
DEFKELVYPPDYNKAAVVLCMDVGFTMSNSIPGIESPFEQAKKVITMFVQRQVFAENKDE
-----F----T------G-----I---------D-D-L---ENK----S-K----DSL-V
     |    |      |     |         | | |   | |    |      | | |
IALVLFGTDGTDNPLSGGDQYQNITVHRHLMLPDFDLLEDIESKIQPGSQQADFLDALIV
--D-I----IG---------I--------CKS------Y---E-D---------A-----
  | |    ||         |         ||            |               
SMDVIQHETIGKKFEKRHIEIFTDLSSRFSKSQLDIIIHSLKKCDISLQFFLPFSLGGPF
-------T---K-IT---------VR----------------S-N-N-RE--V-AK----
           | ||         |                 |     |   |  |    
RLGGHGPSFPLKGITEQQKEGLEIVKMVMISLEGEDGLDEIYSFSESLRKLCVFKKIERH
------R-----N----I--Y---LMD----T-S---GK-V----V---T--A------T
      |     |    |  |   |      |      |          |         |
SIHWPCRLTIGSNLSIRIAAYKSILQERVKKTWTVVDAKTLKKEDIQKETVYCLNDDDET
--L---------WGED----A--D----------K-FD--G----S----R-----Q---
  |          | |       |          | |   |    |    |     |   
EVLKEDIIQGFRYGSDIVPFSKVDEEQMKYKSEGKCFSVLGFCKSSQVQRRFFMGNQVLK
----------PV-----------L---AI------K------G-A----R--------V-
           |           |   ||      |      | |             | 
VFAARDDEAAAVALSSLIHALDDLDMVAIVRYAYDKRANPQVGVAFPHIKHNYECLVYVQ
----SD-----FGG-R-S---------L-SV--L--S-S-S-----T-IIAN--P--DI-
     |     |     |         |  |  |  | |       |       |   | 
LPFMEDLRQYMFSSLKNSKKYAPTEAQLNAVDALIDSMSLAKKDEKTDTLEDLFPTTKIP
-P--E-AYK--L-RG--------------W--FD--AE----GQ----------------
 |         | |               |      ||     |                
NPRFQRLFQCLLHRALHPREPLPPIQQHIWNMLNPPAEVTTKSQIPLSKIKTLFPLIEAK
--
  
KK
1jmc 1jey  154  238 1022  64.71  15.07
----------------K----V---------V---P-------------------I----
                |    |         |   |                   |    
MIVSAIAANALLESVTKFHCGVIYDYSTAEYVSYRPSDFGAYLDALEAEVARGGLIVFHN
------------A--------------------------S-L--T----------P----
            |                          | |  |          |    
GHKYDVPALTKLAKLQLNREFHLPRENCIDTLVLSRLIHSNLKDTDMGLLRSGKLPGKRF
---------Y-------Q---S-K----------------W----------------T--
         |             |                |                |  
GSHALEAWGYRLGEMKGEYKDDFKRMLEEQGEEYVDGMEWWNFNEEMMDYNVQDVVVTKA
---------------I--------------C-A-----R----VT----N------K---
               |                |     |          |      |   
LLEKLLSDKHYFPPEIDFTDVGYTTFWSESLEAVDIEHRAAWLLAKQERNGFPFDTKAIE
----------SQ-IR----T---W--------------------------S---------
          |   |    |   |                                    
ELYVELAARRSELLRKLTETFGSWYQPKGGTEMFCHPRTGKPLPKYPRIKTPKVGGIFKK
--N-S-R-G---------E---G------K--LF---S-------L--------------
  |   | |         |   |          |   |       |              
PKNKAQREGREPCELDTREYVAGAPYTPVEHVVFNPSSRDHIQKKLQEAGWVPTKYTDKG
------E-L----V---------D---E----------S--G---------E---I----
      | |    |         |   |          |  |         |   |    
APVVDDEVLEGVRVDDPEKQAAIDLIKEYLMIQKRIGQSAEGDKAWLRYVAEDGKIHGSV
--------RAT-AF-N------------EQ-------------------V----D-----
        ||| || |            ||                   |    |     
NPNGAVTGRATHAFPNLAQIPGVRSPYGEQCRAAFGAEHHLDGITGKPWVQAGIDASGLE
-K----F---F-------P-L---------I--EV----N-K--VY---Y----------
      |   |         |         |  |     | |   |   |          
LRCLAHFMARFDNGEYAHEILNGDIHTKNQIAAELPTRDNAKTFIYGFLYGAGDEKIGQI
--------------F---------------------S----------------------K
              |                     |                      |
VGAGKERGKELKKKFLENTPAIAALRESIQQTLVESSQWVAGEQQVKWKRRWIKGLDGRK
-----------------G----------T--------LK---------------------
                 |          |        ||                     
VHVRSPHAALNTLLQSAGALICKLWIIKTEEMLVEKGLKHGWDGDFAYMAWVHDEIQVGC
---------I-----A--------N---------K---------Q--------F-T----
         |     |        |         |                  | |    
RTEEIAQVVIETAQEAMRWVGDHWNFRCLLDTEGKMGPNWAICHKIIHLTDDSFDTDVLK
---------------------------A--------V-K-N-D--------Y--E-M-T-
                           |        | | | |        |      | 
ADGAILVDFWAEWCGPCKMIAPILDEIADEYQGKLTVAKLNIDQNPGTAPKYGIRGIPTL
--F-NNE---T-----S--------------V--------M----P--C---------E-
  | | |   |     |              |                |         | 
LLFKNGEVAATKVGALSKGQLKEFLDANLMIVSAIAANALLESVTKFHCGVIYDYSTAEY
------D-----D--------------H--H---LP--T----VQ----F----------
      |     |              |  |    |  |     |    |          
VSYRPSDFGAYLDALEAEVARGGLIVFHNGHKYDVPALTKLAKLQLNREFHLPRENCIDT
--------------D-------------F-T------G--I--------DD----L----
              |             |        |           ||    |    
LVLSRLIHSNLKDTDMGLLRSGKLPGKRFGSHALEAWGYRLGEMKGEYKDDFKRMLEEQG
--------------E----N------------K--S-K----------D---------SL
              |    |            |  | |          |         ||
EEYVDGMEWWNFNEEMMDYNVQDVVVTKALLEKLLSDKHYFPPEIDFTDVGYTTFWSESL
--VDI-------I------G-------I--------C-------K------S-YE-----
  |||              |       |                |      | |      
EAVDIEHRAAWLLAKQERNGFPFDTKAIEELYVELAARRSELLRKLTETFGSWYQPKGGT
D--A---T-----K---I-T--V--------R--------S-------N--NR-------
       |     |   | |  |        |                |   |       
EMFCHPRTGKPLPKYPRIKTPKVGGIFKLDTREYVAGAPYTPVEHVVFNPSSRDHIQKKL
-E---V--------A-----------------KR---N-I--YLM-----------D---
 |   |        |                 |      |  |||           |   
QEAGWVPTKYTDKGAPVVDDEVLEGVRVDDPEKQAAIDLIKEYLMIQKRIGQSAEGDKAW
---TS--GK----V-----VT--AT-----L---------W--------G-E---D----
       ||    |     ||  ||     |                  | |   |    
LRYVAEDGKIHGSVNPNGAVTGRATHAFPNLAQIPGVRSPYGEQCRAAFGAEHHLDGITG
-----A--D--------------KFD----------G---SR-Q-----P--------V-
     |  |               ||          |      |     |          
KPWVQAGIDASGLELRCLAHFMARFDNGEYAHEILNGDIHTKNQIAAELPTRDNAKTFIY
--L--A-------I----K--G---------------A-R-------V--S-----D---
  |  |       |    |  |               | |       |  |         
GFLYGAGDEKIGQIVGAGKERGKELKKKFLENTPAIAALRESIQQTLVESSQWVAGEQQV
-----F--G--G-----RS--------L-S-----------------V---L--------
        |  |     ||        | |                 |   |        
KWKRRWIKGLDGRKVHVRSPHAALNTLLQSAGALICKLWIIKTEEMLVEKGLKHGWDGDF
S--S--------S--T--I----I-----A--------N------------P--------
               |  |    |     |        |            |        
AYMAWVHDEIQVGCRTEEIAQVVIETAQEAMRWVGDHWNFRCLLDTEGKMGPNWAICHKI
---------------------D-----------I-P---E-A--Y--KL---R-------
                     |           | |   | |  |  ||           
IHLTDDSFDTDVLKADGAILVDFWAEWCGPCKMIAPILDEIADEYQGKLTVAKLNIDQNP
G----W----------F---D-------A--EGQ---------
|               |           |   ||         
GTAPKYGIRGIPTLLLFKNGEVAATKVGALSKGQLKEFLDANL
1jmc 2ajq  188  238 1603  78.99  11.73
KVVPIASLTPYQSKWTICARVTNKSQIRTWSNSRGEGKLFSLELVDESGEIRATAFNEQV
    | |       | |     |            |  | ||| |  | | |        
DAITIHSI--L-D-W-I--E-DN---L--------ESPL-SLEKV--S-E-R-SGYS---
DKFFPLIEVNKVYYFSKGTLKIANKQFTAVKNDYEMTFNNETSVMPCEDDHHLPTVQFDF
 |   |        | | |      |         ||   |            |      
-KWH-L-Q--RM--FKKETGHSLG-QY--IRS-RKMT---EIA-QKLKESNE-P-I-L-Y
TGIDDLENKSKDSLVDIIGICKSYEDATKITVRSNNREVAKRNIYLMDTSGKVVTATLWG
      |           |   |    |  | |       | | |  |     |      
--L--AE---R------YGF-ES-QQ-T-LT-RT----F-K-N-Y-FD-----V-PP---
EDADKFDGSRQPVLAIKGARVSDFGGRSLSVLSSSTIIANPDIPEAYKLRGWFDAEGQ
    |    |       |   |    |    |           |    |         
H---KY---R--MTNMQG-E-S----R-F--L-------H---P----L---------
1jmc 1bl0   43  238  116  18.07  37.07
KVVPIASLTPYQSKWTICARVTNKSQIRTWSNSRGEGKLFSLELVDESGEIRATAFNEQV
     |       | |   |  |   | |      |  | || |    |     ||  | 
-----ADV--H-DKAT---RSKNMRAIAT-RDTAIEKRLASL-LTGQ-G-L---AFRVQ-
DKFFPLIEVNKVYYFSKGTLKIANKQFTAVKNDYEMTFNNETSVMPCEDDHHLPTVQFDF
|   |            |        |  |   |       |    |   ||       |
DASLP------------G--R-PD--F-VV-DEYRCVI--FTH--GCFWHHH--HC-YLF
TGIDDLENKSKDSLVDIIGICKSYEDATKITVRSNNREVAKRNIYLMDTSGKVVTATLWG
                 ||  |  |       |   |    |   |      |     | 
K-V-P-ATRT-EFWLEKIG--KNVE-------R-DRRDIS-R---LQELGWRVL--IVW-
EDADKFDGSRQPVLAIKGARVSDFGGRSLSVLSSSTIIANPDIPEAYKLRGWFDAEGQ
| |    | |   |    |       | |         |   |       |       
ECA--LRG-REK-LTDE-A-LTE---R-LEEWICGE-GASAQI-DT---QG-IHLLA-
1jmc 1cw0   48  238  155  20.17  30.97
----KV-------V-PIA-S-LTPYQS---K----W--TIC-ARVT-N-KSQ--IRTW--
    |           |         |   |    |    |    | |      ||    
MLIKKIEELKNSEIKDIIDKRIQEFKSFKNKSNEEWFKELCFCILTANFTAEGGIRIQKE
-SN---S--R---GE-----G-----K------L---F-SL-ELVD--ES---G-E--IR
         |    |     |     |      |   |      |   |      |   |
IGDGFLTLPREELEEKLKNLGHRFYRKRAEYIVLARRFKNIKDIVESFENEKVAREFLVR
---------ATAF--N---EQV---D----K--F---F----P--------------L--
         |  |  |     |   |                |              |  
NIKGIGYQEASHFLRNVGYDDVAIIDRHILRELYENNYIDEIPKTLSRRKYLEIENILRD
I--EVN-K-----VY--Y---------------------------------F-S-KG-T-
|  ||| |      |  |                                 | | |    
IGEEVNLKLSELDLYIWYLRTGKVLKMMLIKKIEELKNSEIKDIIDKRIQEFKSFKNKSN
---LK-----I--AN----------KQ----F-T--------AVKN--D--Y----E---
    |     |  ||          |     | |          ||     |    |   
EEWFKELCFCILTANFTAEGGIRIQKEIGDGFLTLPREELEEKLKNLGHRFYRKRAEYIV
MT--F-N---------NE-TS----V--MP-C---E-----------D----D-H-----
    | |         ||       |         |           |    | |     
LARRFKNIKDIVESFENEKVAREFLVRNIKGIGYQEASHFLRNVGYDDVAIIDRHILREL
----H---LP-T-------------------V-----QFD----F--TG-----------
         | |                   |       |       ||           
YENNYIDEIPKTLSRRKYLEIENILRDIGEEVNLKLSELDLYIWYLRTGKVLKLIKKIEE
-----I-D--D--L-E-----NKS-----KD---S-L-----VD----I---I--G----
     | |  |    |     |||     |      |           |   |  |    
LKNSEIKDIIDKRIQEFKSFKNKSNEEWFKELCFCILTANFTAEGGIRIQKEIGDGFLTL
----I---CKS-----Y-E--D----A-T-K-I--TVRS--N-N--RE--V---------
         |      |         |   | |   | |  |    ||  |         
PREELEEKLKNLGHRFYRKRAEYIVLARRFKNIKDIVESFENEKVAREFLVRNIKGIGYQ
-AK---RNI-Y----------L--M------D----T-S--------------G-KV---
 |    ||  |          |         |    | |              |  |   
EASHFLRNVGYDDVAIIDRHILRELYENNYIDEIPKTLSRRKYLEIENILRDIGEEVNLK
VT-ATL--W----G----------------E--D-AD------------------K----
     |  |    |                |  |  |                  |    
LSELDLYIWYLRTGKVLKMLIKKIEELKNSEIKDIIDKRIQEFKSFKNKSNEEWFKELCF
------F--DGS-R-Q----------P--VL--AIK--G-------------A-R-----
      |   |  | |          |   |    |  |             | |     
CILTANFTAEGGIRIQKEIGDGFLTLPREELEEKLKNLGHRFYRKRAEYIVLARRFKNIK
--V-S--------DF------G-G-R--S--L-SV-LSS-STI---I-----ANP--D-I
  | |         |      | |    |  |  |       |   |      |   | |
DIVESFENEKVAREFLVRNIKGIGYQEASHFLRNVGYDDVAIIDRHILRELYENNYIDEI
PE--A---Y---K--LR--G--------------WFDAEG---Q
|       |      ||  |              |    |    
PKTLSRRKYLEIENILRDIGEEVNLKLSELDLYIWYLRTGKVLK
1jmc 3knt  133  238  824  55.88  16.14
KVVPI-AS-LTPY-QSKWTICAR-V--TN-KS-QIR-TWSNSRGEGK-LFS-L-ELVDES
   |  |            | |        |          |    |  |  |    |  
TLQPTEAAYIAGFLDGDGSIYAKLIPRPDYKDIKYQVSLAISFIQRKDKFPYLQDIYDQL
GEIRATAFNEQVDKF--FPLI-EVN-KVYYFS-KGTLKIANKQFTAV-K--NDY-EMTFN
|  |        |       |               | |  ||        | |     |
GK-RGNLRKDRGDGIADYTIIGSTHLSIILPDLVPYLRIKKKQANRILHIINLYPQAQKN
-NE-TSVMPCEDD-HHL-PTV-QFDFTGIDD-LEN--KS-K-DSL-VDI-IG-----I--
           ||   |         |  |  ||   |  |  |       |        
PSKFLDLVKIVDDVQNLNKRADELKSTNYDRLLEEFLKAGKIESSPTGSGSGSKKNTLQP
CK-SY-----E-D-A--TKITVR-S-NN-R-EV--A----KR-N-I-YLMD--TS-GKVV
    |       |     |   |         |  |     |     || |     ||  
TEAAYIAGFLDGDGSIYAKLIPRPDYKDIKYQVSLAISFIQRKDKFPYLQDIYDQLGKRG
TATL-WGED-AD-KFDGS-R-Q---P--V--LAI--KGA-RV-S--D-F--GGRSLS-VL
      |   ||    ||       |  |  | |  | | |               |  |
NLRKDRGDGIADYTIIGSTHLSIILPDLVPYLRIKKKQANRILHIINLYPQAQKNPSKFL
SSSTIIAN-PDI-PEAYKLRGW-FD---AE----G--Q
    |          |  |     |    |    |   
DLVKIVDDVQNLNKRADELKSTNYDRLLEEFLKAGKIE
1jmc 3fd2   64  238  337  26.89  18.99
KVVPIA----SLTPYQSKWTICARV-T----NKS-QI--RTWS-NSRGEGKLFSLEL-VD
 |   |     |    |    |    |    ||   |            | |       |
MVEVLADHPGELVRTDSPNFLCSVLPTHWRCNKTLPIAFKVVALGDVPDGTLVTVMAGND
E--SGEIR-AT-AFNEQVDKFFPLIEVNKVYYFSKG-TLKIANKQFTAVKNDYEM-TFNN
|  | | | || |   ||  |  |  |       |  || |    ||   |     |   
ENYSAELRNATAAMKNQVARFNDLRFVGRSGR-GKSFTLTI-T-VFT---NPPQVATYHR
ETSVMPCEDDHHLP-TVQ-FDFTGIDDLENKSKDSLVDIIGICKSYEDATKITVRSNNRE
        |    |   |   |     |  ||  |     |     |   |    |   |
AIKI-TV-DGPREPRPIQLWQFL-LELLTDKSCQSFISWTG--DGWE--FKL---SDPDE
VAKRNIYLMDTSGKVVTATLWGEDADKFDGSRQPVLAIKGARVSDFGGRSLSVLSSSTII
|| |         |     |                   | |      |    |  |   
VARR-WGKRKNKPKMNYEKL-SRGL-RYYYDKNIIHKTAGKRYV-Y--RFVCDL-QS-LL
ANPDIPEAYKLRGWFDAEGQ
     ||   |    |    
GY--TPE--ELHAMLDVK-P
1jmc 4l0y   59  238  231  24.79  25.54
KVVPIASLTPYQSKWTICARVTNKSQIRTWSNSRGEGKLFSLELVDESGEIRATAFNEQV
              |       |   |  |       |  |   |  |      | ||  
TNKQV-EIS--MAEWDV---M-N---I-IW-D-K---K--S---V--S------A-NE-I
DKFFPLIEVNKVYYFSKGTLKIANKQFTAVKNDYEMTFNNETSVMPCEDDHHLPTVQFDF
       |  |  |  |       |  |            |                |  
-----VVEIQK--Y--K---EVSDK--T-IRTLITRLYKKE--II--K-RYKSENIYF-Y
TGIDDLENKSKDSLVDIIGICKSYEDATKITVRSNNREVAKRNIYLMDTSGKVVTATLWG
        |  |   | |   |    | | |    |    |   |     |        |
S--SNI--K-ED---D-IKM-KT---A-K-TF-L-N----K--LY-----G--------G
EDADKFDGSRQPVLAIKGARVSDFGGRSLSVLSSSTIIANPDIPEAYKLRGWFDAEGQ
 |  |   |   ||    |            |    |  | ||    |          
-DM-K---S-L-VLNF--AKNEELNNKEIEEL-RD-IL-N-DI--S-K-K--------
1jmc 1xsd   44  238  125  18.49  35.20
KVVPI-ASLTPY-Q-SKWTIC-ARVTNKSQI-RTWSNSRGEGK-LFSL-ELVDESGEIRA
   |       |    |     |       |         |            | |    
E-EPLYVNAKQYHRILKRRQARAKLEAEGKIPKERRKYLHESRHRHAMARKRGEGGRFFS
TAFNEQVDKFFPLIEVNKVYYFS-KGTLKIANKQFTAVKNDY-E-MTF-NNETSVMPCED
  | || |   |   |          | |||      |     |   |   | |   |  
PKFREQ-DIYLPIANVARIMKNAIPQTGKIAKDAKECVQECVSEFISFITSEASER-CHQ
DHHLPTVQFDFTGIDDLENKSKDSLVDIIGICKSYEDATKITVRSNNREVAKRNIYLMDT
     |      |  |             |   ||    |       |||      |   
EKR-KTI--N--G-EDI--LF--AM-STLGF-DSYVEPLKLYLQ-KFREV--QELPLARI
SGKVVTATLWGEDADKFDGSRQPVLAIKGAR--VSDFGGRS-LSVLSSS--TIIANPDIP
  |     |  ||  |      |||  | |         |           |   | || 
K-KIM--KL-DEDV-KMISAEAPVLFAKAAQIFITELTLRAWIHTEDNKRRTLQRN-DIA
EAY-KLRGW-FDAE-GQ
 |  |     |      
MAITKFDQFDFLIDIVP
1jmc 4awl   53  238  233  22.27  22.75
KVVP-IAS-LTPYQSKWTICAR-V-TNKSQIRTWSNSRGEGKLFSLELVDESGE-IRATA
   | |       |           |     |    | | |   |       ||   |  
SIQPWIEKFIKQAQQQRSQSTKDYPTSYRNLRV-KLSFGYGNFTSIPWFAFLGEGQEASN
FNEQVDKFF-PLIEVNKVYYFSKGTLKIANKQFTA-V-KNDYEMTFNNETSVMPCE--DD
    |        |    |  |      |  ||     |   |  |     | |      
GIYPVILYYKDFDELVLAYGISDTNEPHAQWQFSSDIPKTIAEY-FQATSGVYPKKYGQS
HH-L-PTV-Q-FDFTGIDD-LENKSKD-SLVDIIG-ICKSY-EDATK-I-TVRS-NNRE-
       | |  | |     | |   |  |    |       |   |     ||      
YYACSQKVSQGIDYTRFASMLDNIINDYKLIFNSGKSIQPWIEKFIKQAQQQRSQSTKDY
-VAKRNIYL-MDTS-GKVVTATLW----GEDADKFDGSRQPV-LAIK--G----A-RVSD
    ||         |   |   |    ||      |   || |  |       |   ||
PTSYRNLRVKLSFGYGN-FTSIPWFAFLGEGQEASNGI-YPVILYYKDFDELVLAYGISD
FG-GRSLSVLSS---STI---I-ANPDI-P----EA-Y----KL-RG--W--F----D--
          ||    ||     |     |       |    |   |     |    |  
TNEPHAQWQFSSDIPKTIAEYFQATSGVYPKKYGQSYYACSQKVSQGIDYTRFASMLDNI
A-EGQ-
      
INDYKL
1jmc 3ssd   63  238  302  26.47  20.86
------K---VVPIAS--LTPYQSKWT-ICAR-V-TNKSQIRTWSNS-RGE-GKLFS-LE
      |      | |  |       |   |  |   ||||  |          |   ||
GSHMANKRNEALRIESALLNKIAMLGTEKTAEAVGVDKSQISRWKRDWIPKFSMLLAVLE
--LVDES-GEI-R-ATA-F-NE--QV-DK-FFPL-IE---VNKVYYF-SKGTLK-I-ANK
   ||       |   |   |       |    | ||    ||        |       |
WGVVDDDMARLARQVAAILTNKGSHMANKRNEALRIESALLNKIAMLGTEKTAEAVGVDK
-QFTAVKNDYEMTFNNETSVMP---CEDD-HHLP-TVQFDFTGIDDLENKS-K-DS-LVD
 |    | |    |     |       ||   |   |    |      |      | |  
SQISRWKRDWIPKFSMLLAVLEWGVVDDDMARLARQVAAILTNKANKRNEALRIESALLN
-I--IGICKSYE--DATKITVRSNNRE-VAKRNIYLMDTS-GKV--VTATLWGEDADKF-
 |   |  |  |     |       |    |    |     | |    | |    |    
KIAMLGTEKTAEAVGVDKSQISRWKRDWIPKFSMLLAVLEWGVVDDDMARLARQVAAILT
DGSRQPVLAIKGA---RVSDFG-GRSL-SV-LSSSTIIA-NPD-IPE-AYKLR--GW--F
   |   | |  |        |       |    | |     | ||     |    |   
NKKRNEALRIESALLNKIAMLGTEKTAEAVGVDKSQISRWKRDWIPKFSMLLAVLEWGVV
--D-AE-G-Q------
  | |    |      
DDDMARLARQVAAILT
1jmc 1zs4   70  238  316  29.41  22.15
KVV-PIASLTPYQSKWTICARVTNKSQIRTWSNSRGEGKLFSLELVDESGEIRATAFNEQ
    ||   |  |   ||       | |       | |         |||   |      
GAMGPI--ITT-Q-V-TIPKDLAG-S-I-I---GKG-GQRIK-QIRHESG---A-SI--K
VDKFFPLIEVNKVYYFSKGTLKIANKQFTAVKN-DYEMTFNNETSVMPCEDDHHLPTVQF
 |   || |             |   |     |  |     |  ||             |
IDE--PL-EGSE----DR-IITITGTQ-DQIQNAQY-L-LQN--SV---K--QY--SGKF
DFTGIDDLENKSKDSLVDIIGICKSYEDATKITVRSNNREVAKRNIYLMDTSGKVVTATL
 | |            |  |   |    |  |      |   |  |     ||    |  
-F-G--PIIT-TQ---V-TIP--KDL--AGSIIGKGGQR-I-KQ-I-RHE-SG----ASI
WGEDADKFDGSRQPVLAIKGARVSDFGGRSLSVLSSSTIIANPDIPEAYKLRGWFDAEGQ
   |     ||      | |    |                |      |   | |     
-KID-EPLEGSEDRIITITGTQ--D---Q-IQ--NAQYLLQN-SVKQ-YS--GKF-F---


1jmc 1zzi   49  238  161  20.59  30.43
-KVVPIASLT--P-YQSKWTICARVTN-K--SQIRTW--S---N-----S-RG---EG-K
   |   | |          |  |  | |  |    |      |     |       | |
MNLVELGSKTAKDGFKNEKDIADRFENWKENSEAQDWLVTMGHNLDEIKSVKAVVLSGYK
L-FSLE-LV---D--E-SG-EIR--AT--AFNEQVDK-----F-----F-P--L-I----
       ||   |                 || | ||           |    | |    
SDINVQVLVFYKDALDIHNIQVKLVSNKRGFN-QIDKHWLAHYQEMWKFDDNLLRILRHF
--EV-----N---K--VYY--FS---KG---T-L-K----I-AN--K-Q--FTA----V-
  |      |   |       ||          | |               | |    | 
TGELPPYHSNTKDKRRMFMTEFSQEEQNIVLNWLEKNRVLVLTDILRGRGDFAAEWVLVA
-K--NDYEMTF-N-NET-----S--V-M-P----------CE----DD--H--H-L----
 |  |       | ||      |      |                |        |    
QKVSNNARWILRNINEVLQHYGSGDISLSPRGSINFGRVTIQRKGGDNGRETANMLQFKI
-PTVQFD------F---T---GI----D--D-LEN-K--S--KDSLV------D-I--I-
 ||  ||          |   |     |  |  || |  |   | ||      | |    
DPTELFDIMNLVELGSKTAKDGFKNEKDIADRFENWKENSEAQDWLVTMGHNLDEIKSVK
GICKS-YE-DA-TKITV--R-S---NN-R-E-VA-KR--N-I---YL-----M---DTS-
    | |  |      |         |     |  ||  | |    |     |   |   
AVVLSGYKSDINVQVLVFYKDALDIHNIQVKLVSNKRGFNQIDKHWLAHYQEMWKFDDNL
GKVV---TATL--WGEDA-DK---F--DGSR--QP-VLA-I-KG-ARV-SD-F-G-GR-S
       |  |        ||   |    |   |  ||    |    |  |   | |   
LRILRHFTGELPPYHSNTKDKRRMFMTEFSQEEQNIVLNWLEKNRVLVLTDILRGRGDFA
LS-VL-----SSST--II--AN-------P-DI---PE-A--Y-K--L-R-----G----
   ||     |     |    |         ||   |            |     |    
AEWVLVAQKVSNNARWILRNINEVLQHYGSGDISLSPRGSINFGRVTIQRKGGDNGRETA
-W--F--D-AE-GQ-
    |  |  |    
NMLQFKIDPTELFDI
1jmc 2fkc  100  238  494  42.02  20.24
KVVPIASLTPYQSKWTICARVTNKSQIRTWSNSRGEGKLFSLELVDESGEIRATAFNEQV
               |   |  |     |         | | || |      |     | 
---------------T---RI-N---L-T---------LVS-ELADQ--HLMA-EY-RQL
DKFFPLIEVNKVYYFSKGTLKIANKQFTAVKNDYEMTFNNETSVMPCEDDHHLPTVQFDF
   |    | |      |  |        |  |        |         |  |  | |
PRVFG--AVRK--HVANG--K---R----VR-DFKI---SPTFILGA--G-HV-T--F-F
TGIDDLENKSKDSLVDIIGICKSYEDATKITVRSNNREVAKRNIYLMDTSGKVVTATLWG
   | ||   |        |    |   |   |  |    |      | |         |
--YDKLEFLRKRQ-IE-L-I--A-E-CLK---RGFN--I-K-DTTVQDIS-D-IPQEFRG
EDADKFDGSRQPVLAIKGARVSDFGGRSLSVLSSSTIIANPDIPEAYKLRGWFDAEGQ
   |           |  |  |    |    |     ||    |  ||  |   |   
---D-YI-PHE-A-SI--A-ISQ--AR----LDEK--IAQ-R-PTWYKYYG--KAIYA
1jmc 1vas   49  238  137  20.59  35.77
---K----V---VP----IA---------S--L---------T-P---------------
   |         |     |            |           |               
GVPKFFRYISERYPCLSELAREHCIPEFDNLYLDMNGIVHNCSHPFHLEEEQIFQEIFNY
-----Y----Q-----S--------K--------W-T--------I-CA--R-----V--
     |    |     |        |          |           |  |        
VDKLFYLIKPQRLFFLSVDGVAPRAKMNQQRSRRFRTAREAEQQEAKAAQRRFDSNCITP
-TN---KSQ--IR--------T---WS--N---S-R---GEG-----------K------
 |      |   |        |   |       |     |||           |      
GTEFMVRLQEGLRAFLKTKISTDPLWQRCTVILSGQEAPGEGEHKIMDYIRYMKTQPDYD
------LF----S-----L---EL---V--DE-S-G-EI-R-A---T-------A-----
      |           |   ||   |   |   |    |     |             
PNTRHCLYGLDAALIILGLCTHELHFVVLREEVKFGRNVKRTSVEETRFFLLHLGLLREY
----F-----NE------Q-V-D---K-F-----F-P-L--IEV--N--K-VY--Y---F
    |      |      |   |     |     | | |       |     |  |    
LELEFDALRTDEHKLDIAQLIDDWVLMGFLVGNDFIPHLPCLHISSNALPLLYRTYIGIY
-------SK-G--------------T---L---K-IA----N----K--Q-----F--TA
          |              |   |   |  |    |    |  |     |    
PTLGGNINENGKLNLRRLQIFISALTEVELDHFKEHADDDENAVLLKEFQNYKRNFYRNK
VK---ND---------Y----E--M------------------T-F--N--N----E---
 |   ||         |                          | |     |    |   
FKRDPNDELIEELCHHYVNALQWVLDYYYRGVQSWDWYYPFHYTPFISDLKNIEQVEIAF
---T---------SVMP---CE--D-DHH----LPT--V-QF---DF-T---G-------
   |          | |           |    |||     |    |     |       
HMGTPFLPFQQLLAVLPAASAKLLPVAYHDLMLLPTSPLAEFYPLEFESDLNGKKHDWEA
------IDD-------L--ENK-S---KD-S----L-V---D-II-G------------I
      ||        |  |   |             |        |             
VVLIPFIDEGRLLAAMLPCEAQLSLEERERNRHGPMYVYKYSTVAQGPMPAYPPLRALPV
--C----K-S--------Y----E--DATK-I------T--------------VR-----
  |    | |        |    |   |          |              |      
LYCTEVAKWSHEIAVNLPYSVCIELPNAARTVFFPGFPTMQHLPFDFELRNDRVKVFEQV
S-N-N-------R--E-----VA-K---R--NI---YL--------------MD----T-
| | |       |  |     ||              |               |    | 
SRNQNIVLKPRKRQLEDTLTAVASQYLGKVIHVGWPHLVKAIVVRVATRDQRVDSEGITL
-------S-------------G-K-------V-V-T-A---T-------L-----W----
       |             |         | | | |   |       |     |    
NDSRRFDSECKALQEHFINRMGIQFANYDVLVYVRTFAGNSTEFRDKGALMVRDSWSSSV
-G---ED--AD------K---------------F---D---GS--------R-Q------
 |       ||      |               |   |   ||        | |      
TGYPAQGVVADLTVWERKNFLNVEHYFPVGSTIFLITDPYYGSEGTVQDPRRIQVSIMVR
--P---------------------V-------------LA--------I----K------
  |                     |             |         |    |      
PEPKVNAARQLQEERDRDYLSTFQVCNLLRISGRTLGRLSGTVWVVHNIGLQLKYPRQNE
---G--------------A---------R---VSD-FG---G--R--SL-S---------
   |              |         |   | | ||   |  |   |           
ERAGYCFRTNNQWYYSSLAVDLMRNYCQRYPDVIDFFGDSNGHRRVEELANWVRQQPHMK
V--LS--S-S----TI---I-A--------------------N---PDI-----P----E
|   |  |      ||   | |                    |   ||      |     
VERISCGSKTVCRETIELLIAAVDDLRKHVKLQVKPHLLIKPNVTLPDVYRSKRPVRLFD
------A-Y------K-----L---------R-----G---W----FDA--------E-G
        |      |               |              ||         |  
RVVIVRTIYMVPVGTKGTVIGIHPVTDPNPVRLECVHAVDTFCKVLFDSPVRVYKVPEIA
----Q
     
LVIIK
1jmc 2y35  145  238 1025  60.92  14.15
----------------------K-----V----V---P-----------I-A--------
                      |     |    |   |             |        
KAKIVLVGSGMIGGVMATLIVQKNLGDVVLFDIVKNMPHGKALDTSHTNVMAYSNCKVSG
S-----L------------T--PYQS-K-W---------T---------I---C--A---
|     |            |  |  | | |                   |   |  |   
SNTYDDLAGADVVIVTAGFTKAPGKSDKEWNRDDLLPLNNKIMIEIGGHIKKNCPNAFII
RVTN----------------KSQ-I---------R-T-W-S---N--SR-------G-EG
 |||                |   |         |     |   |   |       |  |
VVTNPVDVMVQLLHQHSGVPKNKIIGLGGVLDTSRLKYYISQKLNVCPRDVNAHIVGAHG
------K---------L--F--S-L----EL--V-D-------E------S---------
      |         |  |    |    ||    |       |      |         
NKMVLLKRYITVGGIPLQEFINNKLISDAELEAIFDRTVNTALEIVNLHASPYVAPAAAI
---GE-----I-R----AT--------A--F---------N--EQV--------D--KF-
    |             |           |         |  |||           || 
IEMAESYLKDLKKVLICSTLLEGQYGHSDIFGGTPVVLGANGVEQVIELQLNSEEKAKFD
-----------F-P------------------LI-----------E-V-N----K-----
             |                  ||             | |    |     
EAIAETKRMKALAPKAKIVLVGSGMIGGVMATLIVQKNLGDVVLFDIVKNMPHGKALDTS
---V--Y----------Y--------------FSKG--T------L--K----I-AN-KQ
   |  |          |              | |          |  |    |    | 
HTNVMAYSNCKVSGSNTYDDLAGADVVIVTAGFTKAEWNRDDLLPLNNKIMIEIGGHIKK
-----F----T-------------A-V-KN---------D------Y----------E--
     |    |               | ||         |      |             
NCPNAFIIVVTNPVDVMVQLLHQHSGVPKNKIIGLGGVLDTSRLKYYISQKLNVCPRDVN
----------M-------T--------F-NN--------E--------T---------S-
          |       |        | ||        |        |         | 
AHIVGAHGNKMVLLKRYITVGGIPLQEFINNKLISDAELEAIFDRTVNTALEIVNLHASP
-VMP--------------------C----EDDH-H--L----P-------T--V---Q--
 | |                    |    |    |       |          |   |  
YVAPAAAIIEMAESYLKDLKKVLICSTLLEGQYGHSDIFGGTPVVLGANGVEQVIELQLN
------FD--F--T----------------------G-----I------D----DL-EN-
      ||     |                      |     |      |    |   | 
SEEKAKFDEAIAETKRMKALAAPKAKIVLVGSGMIGGVMATLIVQKNLGDVVLFDIVKNM
---K------------S--K-------DSL-------V------------------D---
   |            |  |       | |       |                  |   
PHGKALDTSHTNVMAYSNCKVSGSNTYDDLAGADVVIVTAGFTKAPGKSDKEWNRDDLLP
------I-I-G-I---C----------------------------K----------S---
      | | | |   |                            |          |   
LNNKIMIEIGGHIKKNCPNAFIIVVTNPVDVMVQLLHQHSGVPKNKIIGLGGVLDTSRLK
-Y--E-------D-------A-----T--K--ITV-----RS--NNR-----EV-A--KR
 |          |       |        |  |||         ||      |  |   |
YYISQKLNVCPRDVNAHIVGAHGNKMVLLKRYITVGGIPLQEFINNKLISDAELEAIFDR
--N----I-------Y-------L-M------D--------T--------S---------
  |    |       |         |      |        |        |         
TVNTALEIVNLHASPYVAPAAAIIEMAESYLKDLKKVLICSTLLEGQYGHSDIFGGTPVV
----G----------------------------------K-V-V-T-------ATL----
    |                                  | | |         |||    
LGANGVEQVIELQLNSEEKAKFDEAIAETKRMKALAPKAKIVLVGSGMIGGVMATLIVQK
-WGE----D---------A-D------------K------F------D------G-----
  |     |         | |            |             |      |     
NLGDVVLFDIVKNMPHGKALDTSHTNVMAYSNCKVSGSNTYDDLAGADVVIVTAGFTKAP
----SR------------Q-------------------P----V--L---A-I---K---
     |                                |    |  |         |   
DKEWNRDDLLPLNNKIMIEIGGHIKKNCPNAFIIVVTNPVDVMVQLLHQHSGVPKNKIIG
--G----AR----VS--------D----F-G--G-------R--S-----L-S-V---L-
  |     |     |        |      |  |       |        |       | 
LGGVLDTSRLKYYISQKLNVCPRDVNAHIVGAHGNKMVLLKRYITVGGIPLQEFINNKLI
S-S---S----TI-----IAN----PDI-P-----E-A--Y-K-L-R---------G-W-
|          |      | |    |   |     | |  | | |           |   
SDAELEAIFDRTVNTALEIVNLHASPYVAPAAAIIEMAESYLKDLKKVLICSTLLEGQYG
--------------------------------FD---AE-----G-Q
                                ||   ||        
HSDIFGGTPVVLGANGVEQVIELQLNSEEKAKFDEAIAETKRMKALA
1jmc 3zh2  167  238 1247  70.17  13.39
-------K----V--VPIA----S--L---TPY--------Q-SKW-TICARVTNKSQIR
       |               |        |        | ||   | |   |   | 
SLSDQLSKQTLLISQLQVGKNRFSFKFEGRVVYKSSTFQNQQDSKYFFITAQDANNQEIN
-T-W-----S-NS-R-GE------G--KLF--SLEL---V-D------E----S-G----
   |     |      |       |  | |   |||     |      |    | |    
LSFWQKVDQSYQTLKVGQYYYFIGGEVKQFKNNLELKFKFGDYQIIPKETLGGSGGSTLL
--EI-R-A----T--A----F-----N-E-QV-D-------K--FFP-L-IE------VN
  |            |          |      |       |   || |  |       |
ISEVLKTSKQYLSVLAQVVDIQSSDKNIRLKICDNSCNQELKVVIFPDLCYEWRDKFSIN
K-------V---Y----------Y------------------------------FS-K--
|       |   |                                         || |  
KWYYFNEFVRQIYNDEVQLKNNIHSSIKESDDSLSDQLSKQTLLISQLQVGKNRFSFKFE
G-------TL------K---I----A-----N-----K--Q-F-T-----------A-V-
|       |       |   |    |     |     |  |   |             | 
GRVVYKSSTFQNQQDSKYFFITAQDANNQEINLSFWQKVDQSYQTLKVGQYYYFIGGEVK
--K-N--------DY-------------------E-M-T---F-----------------
  | |        ||                   |   |                     
QFKNNLELKFKFGDYQIIPKETLGGSGGSTLLISEVLKTSKQYLSVLAQVVDIQSSDKNI
------N--N-ETS-VM-P--C-E--D-------------------D------H-H----
      |  | |   |  |  | |  |                   |        |    
RLKICDNSCNQELKVVIFPDLCYEWRDKFSINKWYYFNEFVRQIYNDEVQLKNNIHSSIK
--------L--PT--V---Q-----FD--FTG--I----------D---------DL---
        |   |      |     |   | |             |         |    
ESGSLSDQLSKQTLLISQLQVGKNRFSFKFEGRVVYKSSTFQNQQDSKYFFITAQDANNQ
E-NKS---K-D-S---L------------V--------------D--II---------G-
| | |   | | |   |            |              |  ||         | 
EINLSFWQKVDQSYQTLKVGQYYYFIGGEVKQFKNNLELKFKFGDYQIIPKETLGGSGGS
---I---CK-S--Y-----E--D--AT------KI---T-------V---------R---
   |    | |  |        |          ||           |         |   
TLLISEVLKTSKQYLSVLAQVVDIQSSDKNIRLKICDNSCNQELKVVIFPDLCYEWRDKF
S-N-----N---R-----EV-AKRNIY--L----M-D-----T---S----G------K-
| |     |   |     ||  | ||          |     |   |    |      | 
SINKWYYFNEFVRQIYNDEVQLKNNIHSSIKESSLSDQLSKQTLLISQLQVGKNRFSFKF
---VV----T------A-----T----------L--WGE-D-A-D--K------F-DGS-
   ||    |            |          |  |   |      |      |  |  
EGRVVYKSSTFQNQQDSKYFFITAQDANNQEINLSFWQKVDQSYQTLKVGQYYYFIGGEV
RQ-P--V-LAIK-G-AR-V-SD-FGGR--S--L-S-VL--S----S---------ST---
 |      |  | |          ||   |  | | ||  |    |         |    
KQFKNNLELKFKFGDYQIIPKETLGGSGGSTLLISEVLKTSKQYLSVLAQVVDIQSSDKN
I---I---A-NPD----I-PE-AY----K--LRGW-----F------D-AE-------G-
|   |     |      | |   |    |     |     |      |            
IRLKICDNSCNQELKVVIFPDLCYEWRDKFSINKWYYFNEFVRQIYNDEVQLKNNIHSSI
-Q-
   
KES
1jmc 3u58  142  238  843  59.66  16.84
KVVPIASLTPYQSKWTICARVTNKSQIRTWSNSRGEGKLFSLELVDESGEIRATAFNEQV
    |    |  |     | |             | |       |      |  ||    
R--RI-R-RPF-S---V-AEV--EALVEAVEHL-GTGR-WR-D-V----KMR--AF-DNA
DKFFPLIEVNKVYYFSKGTLKIANKQFTAVKNDYEMTFNNETSVMPCEDDHHLPTVQFDF
|                 |  ||  |                 |               |
D-HRTYVDLKDKWKTLVHTASIAPQQRRGEPVPQDL-L--D-RVLAAH-AYWSQRIRRPF
TGIDDLENKSKDSLVDIIGICKSYEDATKITVRSNNREVAKRNIYLMDTSGKVVTATLWG
      |       |   |      |  |      |     |  |  |   |    ||  
S-VAEVE-ALVEA-VEHLGTGR-WRD-VKMRA-FDNAD--HRT-Y-VDLKDK--WKTL-V
EDADKFDGSRQPVLAIKGARVSDFGGRSLSVLSSSTIIANPDIPEAYKLRGWFDAEGQ
  |       |      |  |       |  |      |      ||    |     |
HTA-SI-APQQ---R-RGEPV-P---QDL--L--DRVLA----AHAY----W--S--Q
1jmc 2qhb   41  238  171  17.23  23.98
-KV-VP--IASLTPYQ--S--KWTICA-R--V----TN-KS-Q--I--R-T-WSNS-RG-
    |          |     |    | |        | |     |    |    |    
GHMNVKRRTHNVLERQRRNELKRSFFALRDQIPELENNEKAPKVVILKKATAYILSVQAE
EGKLFS----L----E-L---VDE-SG-EIRA--TAF----NEQV-DKF--F----P-LI
| || |    |    | |        |   ||   |          | |       | | 
EQKLISEEDLLRKRREQLKHKLEQLGGCDKRAHHNALERKRRDHIKDSFHSLRDSVPSLQ
-E-VNKVYYFSKGT--LK-IANKQFTAVKNDY-EMTFNN---ETSV--M-PC---E-DDH
 |         | |        |  |    |       |   |  |     |       |
GEKASRAQILDKATEYIQYMRRKNHTH-QQDIDDLKRQNALLEQQVRALGGCMNVKRRTH
H-L--P--T-VQFDFTGI-D---DLENKSKDSLVDIIGICKSY--E-DA--TK-ITVRS-
  |           |    |    |||  |   | |      |     |   | |     
NVLERQRRNELKRSFFALRDQIPELENNEKAPKVVILKKATAYILSVQAEEQKLISEEDL
--NNREVAKRNIYLMDTSGKVVTATLWGEDADKFDGSRQPVLAIKG--A-R--VSDFGGR
    ||  |                      | |   |  |    |  | |    |    
LRKRREQLKHKLEQLRAHHNALERKRRDHIKDSFHSLRDSVPSLQGEKASRAQILDKATE
SLSVLSSSTIIANPDIPEAYKLRGWFD----A-EGQ
              ||               |  | 
YIQYMRRKNHTHQQDIDDLKRQNALLEQQVRALGGC
1jmc 1nkp   64  238  335  26.89  19.10
-------KV------V-P----IAS-L--T--P-Y--Q-S-KWTI-CARVTNKSQIRTW-
        |        |     |  |  |    |  |    |       | |    |  
EPDDDLERVRATLYSLDPDGDRTAGVLRDTLDQLYDGQRTGRWNFDQLHKTEKTHMGTLV
S-N-SR------G-----E--G-KL---FSL-E---LV-DES-GE----I-----R-A-T
  |  |      |     |  |      ||          || |     |       | |
EINLHREFQFGDGFETDYEIAGVQVDCKFSMSQGAWMLPPESIGHICLVIWASDQQCAWT
A--------F----N---------E---Q-V----D--K------F-FP--L---I----
|        |    |         |   | |    |  |         |      |    
AGLVKVIPQFLGTANRDLKRRLTPEGRAQVVKLWPDHGKLQENLLLHIPGDVRDQIFSAK
--------E--VN----KVY--------------Y--F-----------S--K--G--TL
           ||     |                  |           |     |   |
SSRGNQHGQARVNELFRRVHGRLIGRAVIATVAQQDDFMKRVRGSGGARSILRPEGIIIL
-------KIAN--------K-Q-FTA--V---KND--Y--EM---TF-----NN---ETS
       | ||        | |   |  |     |     |                |  
GHQDNDPKVANDLGLPVPRKGQVVAARVVPADEGDQRQTAEIQGRRWAVAVPGDPIVEAP
VMPCE--DD----H---H-L-P----T--V------Q-FD--FTG---ID-----D----
| | |  ||          | |    |  |      |  |   ||    |          
VVPREPDDDLERVRATLYSLDPDGDRTAGVLRDTLDQLYDGQRTGRWNFDQLHKTEKTHM
--L-E-N--KS-K--DSL-VD--IIG--I-CK-SY-EDA------T--KI--TV-RSNNR
  | | |        |    |  | |    || |    |          |      |   
GTLVEINLHREFQFGDGFETDYEIAGVQVDCKFSMSQGAWMLPPESIGHICLVIWASDQQ
-E-VA--KRNI--YL----MD-----T-SGKVVTATLW---G---E--------DA-DK-
    |     |   |     |     |  |      ||   |   |        |  |  
CAWTAGLVKVIPQFLGTANRDLKRRLTPEGRAQVVKLWPDHGKLQENLLLHIPGDVRDQI
FD--GSR-----QP-V--L--AI--K--G----ARVS---DF-------GG-RS-L---S
|    ||     |  |  |         |    | |    ||       || || |    
FSAKSSRGNQHGQARVNELFRRVHGRLIGRAVIATVAQQDDFMKRVRGSGGARSILRPEG
--VL---SSSTIIAN------P---D------IP--EA-YK----LRG--W---F--D--
   |         ||      |           |  |          |  |      |  
IIILGHQDNDPKVANDLGLPVPRKGQVVAARVVPADEGDQRQTAEIQGRRWAVAVPGDPI
AEG----Q
 |      
VEAPVVPR
1jmc 1iaw  116  238  608  48.74  19.08
KV-V-PIA-S---LT-P-Y--Q--S---K---W-TICA---R----V----T--------
       | |   |       |  |   |        |   |    |    |        
VLDANTAAQSGVGLARAHFEKQPPSNLRKSNFFHFVLALYDRQGQPVEIERTAFVGFVEK
----N--K-SQ-I--R---TWSNS-RGE-G---KLF-SL--E-LV----DESGEI-RA--
    |  |    |  |     ||  | |      |  |      |    |   |  |   
EKEANSEKTNNGIHYRLQLLYSNGIRTEQDFYVRLIDSMTKQAIVYEGQDKNPEMCRVLL
T-AFN-EQ-VD-K-F-----FPL--IEVNKVY--YFSK-G-T-LKIA-N----KQF-TAV
|         | |        |             | |     || | |      |   |
THEIMCSRCCDKKSCGNRNETPSDPVIIDRFFLKFFLKCNQNCLKNAGNPRDMRRFQVVV
K---N-D-Y--EMT---F--NN------E--T---S-V-M---------P--C-EDD--H
    | |          |  ||         |   | |           |         |
STTVNVDGHVLAVSDNMFVHNNSKHGVLDANTAAQSGVGLARAHFEKQPPSNLRKSNFFH
H---L------PT-VQ---F-DF-----------T--GID---D-L-EN--KS-KD---S
    |      |       |  |           |  ||      |  |      |    
FVLALYDRQGQPVEIERTAFVGFVEKEKEANSEKTNNGIHYRLQLLYSNGIRTEQDFYVR
LVD------II--G------ICK---SYE-------D--A------T-K--ITV-R----
| |      |   |       |      |       |         |        |    
LIDSMTKQAIVYEGQDKNPEMCRVLLTHEIMCSRCCDKKSCGNRNETPSDPVIIDRFFLK
-------S---N--N-----R-E--VAKR-NI--Y-L-M-D------TS--GK-V-VTAT
           |  |     |    |    |     |   |       |  |        
FFLKCNQNCLKNAGNPRDMRRFQVVVSTTVNVDGHVLAVSDNMFVHNNSKHGENLYFQVR
LW--GE---DAD---KFD-G-SR-----Q-P-----------VLAI--K-GARVS-D---
 |  |    ||        |  |     | |           |||     |  |      
TWMQGAGVLDANTAAQSGVGLARAHFEKQPPSNLRKSNFFHFVLALYDRQGQPVEIERTA
F-G---G---R-S-L-S----------V-L-SS--S---T--II-A-NP-D---IP----
| |   |   |   | |          | |  |      |  |     | |   |     
FVGFVNGIHYRLQLLYSNGIRTEQDFYVRLIDSMCRVLLTHEIMCSETPSDPVIIDRFFL
EAY-K-----L--RGW--F--------D-----A--EG---Q
    |     |  |    |              |        
KFFLKCNQNCLKPRDMRRFQVVVSTTVNVGHVLAVSDNMFVH
1jmc 3mln  106  238  582  44.54  18.21
KVVPI-AS-L--------T-PY---------Q--SK---WTI----C---A-R-VTN---
   |   |          |            |  |      |    |   |   |     
NLSPLERSKIEKQYGGATTLAFISNKQQELAQILSRADILKIASYDCAAHALQAVLDCGP
---K---SQ--I-RTWSN-----S-RG----E---GKL-FS----------L---E-L--
   |   ||  |     |             |   ||  ||                |  
MLGKRGFSQSDIVKIAGNIGGAQALQAVLDLESMLGKRGFSRDDIAKMAGNIGGAQTLQA
V-D-ES-----G----EI-R---------A---------T----AF----------N---
| | ||     |     |           |         |     |          |   
VLDLESAFRERGFSQADIVKIAGNNGGAQALYSVLDVEPTLGKRGFSRADIVKIAGNTGG
EQ----V-D------K--F--FPLIEV---N---K----V--Y---Y----FSKGTL-KI
 |    | |      |  |           |        |           ||  |  ||
AQALHTVLDLEPALGKRGFSRIDIVKIAANNGGAQALHAVLDLGPTLRECGFSQATIAKI
A-N------------------KQ-FT-A-V-K---N-----------DYE--M-------
| |                  |  |  |   |   |           | |          
AGNIGGAQALQMVLDLGPALGKRGFSQATIAKIAGNIGGAQALQTVLDLEPALCERGFSQ
-T---F--NN---ET--SV--M-PC-------E-D-------D----------HHLPTV-
 |      ||        |    |          |       |           | ||  
ATIAKMAGNNGGAQALQTVLDLEPALRKRDFRQADIIKIAGNDGGAQALQAVIEHGPTLR
Q--F---D---FTG-I------D---D----L-ENK-SK-D--SL---V------D-I--
|  |   |     | |          |    | |   |  |                   
QHGFNLADIVKMAGNIGGAQALQAVLDLKPVLDEHGFSQPDIVKMAGNIGGAQALQAVLS
IG--IC-KSY-E-D----A--T------K-I-----T-----------VR-SNNR-----
 |           |    |  |              |           ||   ||     
LGPALRERGFSQPDIVKIAGNTGGAQALQAVLDLELTLVEHGFSQPDIVRITGNRGGAQA
-E-V-A-----K-R------------N------IY-LMD---T--S-G--K--VV-TA--
   | |       |            |           |   |    |      |  |  
LQAVLALELTLRERGFSQPDIVKIAGNSGGAQALQAVLDLELTFRERGFSQADIVKIAGN
---T--LWG--E-D---ADK-F---D-----GSR---Q---PV------L-------A-I
   |  |           |  |   |     |     |    |      |       | |
DGGTQALHAVLDLERMLGDRGFSRADIVNVAGNNGGAQALKAVLEHEATLNERGFSRADI
-K------G--A-R-V-----S-D---F------------GG-RSL-SVL----S-S---
 |      |  |   |       |   |            ||   |  ||          
VKIAGNGGGAQALKAVLEHEATLDERGFSRADIVRIAGNGGGAQALKAVLEHGPTLNERG
-S-T-II---AN--------------P----------DIPE--------AYK--LR-G--
   | |    ||              |          || |        | |  |  |  
FNLTDIVEMAANSGGAQALKAVLEHGPTLRQRGLSLIDIVEIASNGGAQALKAVLKYGPV
WFDA-----E-----------G---Q------
   |     |           |          
LMQAGRSNEEIVHVAARRGGAGRIRKMVAPLL
1jmc 4cja  126  238  752  52.94  16.76
-----------------KV-V-PI-A--SL----TP---Y-QS--K---WT--IC-AR--
                 |    |  |   |    ||         |          |   
NLTNSNCVEEYKENGKTKIRIKPFNALIELYHHQTPTGSIKENLDKLENYVKDVVKAKGL
-V-TN-K-SQIR-TW--------S-NSR--GE-G-----KL-----FSL-ELVD-ESGE-
   |    |  | ||        | | |   |       |      |      | |  | 
AIPTSGAFSNTRGTWFEVMIAIQSWNYRVKRELNDYLIIKMPNVKTFDFRKIFDNETREK
---I-RA--T----A--F--N-E-----QVD--K--F-FP---L----IEV--N--K-V-
         |          |       | |  |     |   |    | |     |   
LHQLEKSLLTHKQQVRLITSNPDLLIIRQKDLIKSEYNLPINKLTHENIDVALTLFKDIE
---YYFS--KGT-LK--I-AN-K-QFT--A-V-KN--DY-EMTF-N-N-E------TS--
      |   |  ||         |        |       |   |   |       |  
GKCKWDSLVAGVGLKTSLRPDRRLQLVHEGNILKSLFAHLKMAYWNPKAEFKYYGASSEP
VMPCEDD-------H---HL---P--TV-Q-FDFTG---ID---D-----L---------
|    ||       |        |   |   |  |    ||   |     |         
VSKADDDALQTAATHTIVNVNSTPERAVDDIFSLTSFEDIDKMLDQIIKNLTNSNCVEEY
-EN-KS----K--DSLVDI------IG-I---C-K--SY-ED-A-TK---I-T--VRSNN
 || |     |    |          | |     |   |  |    |   | |    || 
KENGKTKIRIKPFNALIELYHHQTPTGSIKENLDKLENYVKDVVKAKGLAIPTSGAFSNT
R----EV--A--------KR--NIYL---M------------D--T---------S---G
|    ||  |        ||  | ||   |            |  |         |    
RGTWFEVMIAIQSWNYRVKRELNDYLIIKMPNVKTFDFRKIFDNETREKLHQLEKSLLTH
K--V--VTAT----------L----W----G----E--D-A-----D-----KFD----G
|  |   |            |              |  | |     |     | |    |
KQQVRLITSNPDLLIIRQKDLIKSEYNLPINKLTHENIDVALTLFKDIEGKCKWDSLVAG
-S-R---QP---V-L---A-I-KG--A--RV------SDF---GGRS--LS-----VL--
        |     |     | |   |            |   |  |   |      |  
VGLKTSLRPDRRLQLVHEGNILKSLFAHLKMAYWNPKAEFKYYGASSEPVSKADDDALQT
SSS-TII-AN--PD--IPEAYKLRGWFDAE---GQ---
    ||   |  |         |    |      |   
AATHTIVNVNSTPERAVDDIFSLTSFEDIDKMLDQIIK
1jmc 3v1z  110  238  578  46.22  19.03
----K-----V--VPIASL-TPYQ-S-K----W-TI--CARVTNKSQ--IRTWSNSR--G
             ||   |        |       |      |   |  ||        |
SDPVRQYLHEIGQVPLLTLEEEIDLARKVEEGMEAIKKLSEATGLDQELIREVVRAKILG
EGKL--F-SL-E-----LVDE-SGEIRA--TAFNE--QV--D-KFF-P-LIEVN-K--V-
         | |      | |  |                         ||| |    | 
TARIQKIPGLKEKPDPKTVEEVDGKLKSLPKELKRYLHIAREGEAARQHLIEANLRLVVS
Y---YFSKG-T-LK-I--ANK-QFTAV-KNDYE--MTFNN-ET-----SV-MPCED---D
    |   |   |  |   |     || |  |     |    |            |   |
IAKKYTGRGLSFLDLIQEGNQGLIRAVEKFEYKRRFKFSTYATWWIRQAINRAIADQASD
----H-H-L---P--TV--QFDFT-GIDD-LE--NK-SK----D-SLV-D-I---I-G--
      |     |  |     |         |   | |     |  |        | |  
PVRQYLHEIGQVPLLTLEEEIDLARKVEEGMEAIKKLSEATGLDQELIREVVRAKILGTA
-ICK--SY-E--D-AT--KI--TVRS---N-NR--EVAKR-N-I--YLMDTSGK-VVT-A
 | |     |  |  |         |      |    |         |       ||  |
RIQKIPGLKEKPDPKTVEEVDGKLKSLPKELKRYLHIAREGEAARQHLIEANLRLVVSIA
---T---L-W------G-ED---A-DKFD-GSR-Q-PVLA---IKGA--R-VSDFG-G-R
   |   |        |      |  ||    |      |   |  |  |   |     |
KKYTGRGLSFLDLIQEGNQGLIRAVEKFEYKRRFKFSTYATWWIRQAINRAIADQARTIR
-SL-SV--LSS-S-T---I---IA-NPDIPE-AYKL-RGWFDA----EG-Q--
     |      | |           |   | |     || ||    |     
IPVHMVETINKLSRTARQLQQELGREPSYEEIAEAMGPGW-DAKRVEETLKIA
1jmc 4ki2   80  238  412  33.61  19.42
--KVVPI--AS-LTPYQSKWTICA-RVTNKSQIRTWSNSRGE-GKLFSLELVD-ES-GEI
  |   |     |          | ||         |    | |  |     |      |
VNKKTKIRHRNELNHTLAQLPLPAKRVMYMALALIDSKEPLERGRVFKIRAEDLAALAKI
R-ATAFNEQVDKFFPLIEVNKVYYFSKGTLKIANKQFTAVKNDYEMTFNNETSVMPCEDD
    |   |      |    |           | |                    | |  
TPSLAY-RQLKEGGKLLGASKISLRGDDIIALA-KELNS-E-ELDLNIIEWIAYSPDEGY
HHLP-TVQFD-F-TGIDDLENKSKDSLVDI-IGICKSYEDATKITVRSNNREVAKRNIYL
  |  |              ||    |          |        |       | |   
LSLKFTRTIEPYISSLIGKKNKFTTQLLTASLRLSSQYSSSLYQLIRKHYSNFKKKNYFI
MDTSG-K-VVTATLWGEDAD-KFDGSRQPVL-A-IKGARVSDFGGRS-LSVLSSSTIIAN
      |    |     |          |                    |     |    
ISVDELKEELIAYTFDKDGNIEYKYPDFPIFKRDVLNKAIAEIKKKTEISFV-GFT-VHE
PDIPEAYKLRGWFDAEGQ
       ||   |     
KEGRKISKLKFEFVVDED
1jmc 2nra   38  238  252  15.97  15.08
-KV-VPIASLTPYQSKWTICAR-V-TNKSQIR-TWSNSRGEGKLFSLELVDESGEIRATA
 |            |      |   |       |  | |   |     |  |    |   
YKIRRERNNIAVRKSRDKAKMRNLETQHKVLELTAENERLQKKV-E-QLSRELSTLR-NL
FNEQVDKFFPL-IEVNKV-YYFSKGTLKIANKQFTAVKNDYEMTFNNETSVMPCED-DHH
|  |         | |      |    |  |   |  |   | |  ||      |     
F-KQLPEEYKIRRERNNIAVRKSRDKAKMRNLE-TQHK-VLELTAENERLQKKVEQLSRE
LPTVQFDFTGI-DDLENKSKDSL-VDII-GICKSYEDATKITVRSNNREVAKR-NIYLMD
| |    |              |    | |     ||              ||       
LSTLRNLFKQLPEQCQHRWQKVLNPELIKGPWTKEED-QRV-IKLVQKYGPKRWSVIAKH
TSGKV-VTA-TLW-GE-DAD--KFDGSRQPVLAIKGARVSDFGGRSLSVLSSSTIIANPD
  |         |         |          |  |     | |              |
LKGRIGKQCRERWHNHLNPEVKKTSWTEEEDRIIYQAH-KRLGNR-WAEI-AKLLPGRTD
IPEAYKLRGWFDAEGQ
   | |   |      
--NAIK-NHWNSTMRR
1jmc 1h89   46  238  242  19.33  19.01
----KVVP-I-A-SLT--PYQ-S-K-WTICA--R----V-T-NKSQ-IR--T----WSNS
              ||    |   |     |  |      |      |   |    |   
GLERRLLAGLQGLGLTINQAQRAVKHFGADALDRLEKDLFTLTEVEGIGFLTADKLW-QA
R-G--EG--KL-----FSLELV-DESG---------E---I---RAT---A-FN-E-QVD
| |       |       | |     |         |       | |   |    |  | 
RGGALDDPRRLTAAAVYALQLAGTQAGHSFLPRSRAEKGVVHYTRVTPGQARLAVETAVE
--KF----FPLI-E---V--NKVY--Y-F-S--K--G---T-L------------KIANK
         ||  |         |         |      | |            | | |
LGRLSEDDSPLFAEAAATGEGRIYLPHVLRAEKKLASLIRTLLATPPADDDWAVPKKARK
-----Q---F--TA-----V--------KN-------D------YE--M---T---F-N-
     |       |     |        |        |       |      |       
GLSEEQASVLDQLAGHRLVVLTGGPGTGKSTTTKAVADLAESLGLEVGLCAPTGKAARRL
NE----T-S-V---M---PCEDDH-HLPTVQFDFTGID------D-LE-N--KS--KDS-
 |    | | |       |    | ||     |    |      | |             
GEVTGRTASTVHRLLGYGPQGFRHNHLEPAPYDLLIVDEVSMMGDALMLSLLAAVPPGAR
--LV---D-I--I--GI-CKSY-EDA-T-KIT-V-R--S-N------N---R-EV-A---
  ||   |       |         | | | | | |    |            |  |   
VLLVGDTDQLPPVDAGLPLLALAQAAPTIKLTQVYRQAAKNPIIQAAHGLLHGEAPAWGD
KR-N---I--------Y-LM--DTSGK-VV-TAT-L----WGED-AD---K--F---DGS
|| |   |          ||     |   |   |       | |         |    | 
KRLNLTEIEPDGGARRVALMVRELGGPGAVQVLTPMRKGPLGMDHLNYHLQALFNPGEGG
-R----Q--P----V---------LA-I-K--GARVS-D----------FG---GRSLSV
 |       |    |         |    |  |||   |          |    |  | |
VRIAEGEARPGDTVVQTKNIFNGTLGMVLKAEGARLTVDNVVELTGAELFNLQLGYALTV
--L--SS-STI--I---AN-PDIP-E-AY-KL-----R----G----W-F------D---
     |   |       |  |       |  |     |    |    |            
HRAQGSEWGTVLGVLHEAHMPMLSRNLVYTALTRARDRFFSAGSASAWQIAAARQREARN
-A--E---GQ-
 |  |      
TALLERIRAHL
1jmc 3gp8  101  238  550  42.44  18.36
KVVPIASLTPYQSKWTICARVTNKSQIRTWSNSRGEGKLFSLELVDESGEIRATAFNEQV
  |       ||  |    |             |  |          |    |  |   |
--VS-SEI--YQ--W-V--R--D--ELK-----RA-G-------I--S-Q--A-VF-ARV
DKFFPLIEVNKVYYFSKGTLKIANKQFTAVKNDYEMTFNNETSVMPCEDDHHLPTVQFDF
   |     |       | |                    |      | |   |      
-A-F-----NR----TQG-L-L-S-E---I-----L--RKE------E-D---P--K---
TGIDDLENKSKDSLVDIIGICKSYEDATKITVRSNNREVAKRNIYLMDTSGKVVTATLWG
|        |  ||                 |  | |  |  |  |           |  
TA-------SQ-SL---------------L-V--NLR--AMQN-FL-----Q-----L-P
EDADKFDGSRQPVLAIKGARVSDFGGRSLSVLSSSTIIANPDIPEAYKLRGWFDAEGQ
| |   |  |         |      |       |             ||        
E-AER-D--R--I--YQDER--E---R-------S-------------LR--------
1jmc 2o49   39  238   83  16.39  46.99
------------------K-----V--VP-------IA-SL-TP--Y--------Q--SK
                  |         |       ||    |            |  | 
PHRYRPGTVALREIRRYQKSTELLIRKLPFQRLVREIAQDFKTDLRFQSSAVMALQEASE
-W-------T-IC---A-RVT---------------------N-----------------
         |  |   | |||                     |                 
AYLVALFEDTNLCAIHAKRVTIMPKDIQLARRIRGERKVLRDNIQGITKPAIRRLARRGG
-K--S---------------Q--I----------------------------RT-W----
 |  |                  |                            ||      
VKRISGLIYEETRGVLKVFLENVIRDAVTYTEHAKRKTVTAMDVVYALKRQGRTLYGFGA
------S------------------N-S-R---G-----------------E--G-----
      |                  |   |   |                 |  |     
KAKTRSSRAGLQFPVGRVHRLLRKGNYAERVGAGAPVYLAAVLEYLTAEILELAGNAARD
----------------------K------------L--F-S--L-----E---------L
                      |            |    |  |     |         |
NKKTRIIPRHLQLAVRNDEELNKLLGRVTIAQGGVLPNIQSVLLPKTRKESYAIYVYKVL
--------------------V-D--E--SG-----------------EI----R------
                    | |  |   |                 ||    |      
KQVHPDTGISSKAMSIMNSFVNDVFERIAGEASRLAHYNKRSTITSREIQTAVRLLLPGE
------------------A-----T-A------F--N-E--------Q--V-----D-K-
                  |     | |           |        |  |     | | 
LAKHAVSEGTKAVTKYTSARYRPGTVALREIRRYQKSTELLIRKLPFQRLVREIAQDFKT
---F-------------------F------------------------------------
   |                   |                                    
DLRFQSSAVMALQEASEAYLVALFEDTNLCAIHAKRVTIMPKDIQLARRIRGERRHRKVL
---------P----------------LI--E------V---N--------------K---
         |                ||  |      |   |              |   
RDNIQGITKPAIRRLARRGGVKRISGLIYEETRGVLKVFLENVIRDAVTYTEHAKRKTVT
----VY---------Y-F---------S----------------K---------G-----
    ||         | |         |                |         |     
AMDVVYALKRQGRTLYGFGGAKAKTRSSRAGLQFPVGRVHRLLRKGNYAERVGAGAPVYL
-------T-----L---------K---I------A-------NK----------------
       |     |         |   |      |       ||                
AAVLEYLTAEILELAGNAARDNKKTRIIPRHLQLAVRNDEELNKLLGRVTIAQGGVLPNI
Q---F--T-----A---------V--------K---------ND-Y-----E---MT-FN
|      |     |         |        |         ||       |       |
QSVLLPKTRKESYAIYVYKVLKQVHPDTGISSKAMSIMNSFVNDVFERIAGEASRLAHYN
------N-E--T---------------S-----V------------MP-----------C
        |  |               |     |             |           |
KRSTITSREIQTAVRLLLPGELAKHAVSEGTKAVTKYTSAIAFHLELPKRRTVLGNVLVC
---------------E-----------D--D------HHLP-T----V-QF---D---F-
               |           |  |      | |  |       |   |     
GNGDVGQLGLGEDILERKRLSPVAGIPDAVDISAGGMHNLVLTKSGDIYSFGCNDEGALG
--T---G-------ID-----------D------LEN-K-----S-KDS-----L-VD--
  |   |       ||           |      ||        |  ||     |  |  
RDTSEDGSESKPDLIDLPGKALCISAGDSHSACLLEDGRVFAWGSFRDSHGNMGLTIDGN
----I----------I--G-----I-----------C-----------KSY--E------
    |          |  |     |           |            |   |      
KRTPIDLMEGTVCCSIASGADHLVILTTAGKVFTVGCAEQGQLGRLSERSISGEGRRGKR
D----A----T--K----I------T-VR-S----------NN-R----EV-----A---
|         |  |    |      |  | |          ||      |      |   
DLLRPTQLIITRAKPFEAIWATNYCTFMRESQTQVIWATGLNNFKQLAHETKGKEFALTP
-----K--R-------N--I--------------Y--L-M----D-----------T---
     |  |          |              |  |      |           |   
IKTELKDIRHIAGGQHHTVILTTDLKCSVVGRPEYGRLGLGDVKDVVEKPTIVKKLTEKI
-S---GKVVT-A-T----L--W--G---E----DA-D--------------K--------
 |   | |   | |    |  |  |        |  |              |        
VSVGCGEVCSYAVTIDGKLYSWGSGVNNQLGVGDGDDELEPIVVVSKNTQGKHMLLASGG
-----F----D--------------------GS--------------R-Q--PV--L--A
     |    |                    |               |    ||     |
GQHAIFLVKADIAFHLELPKRRTVLGNVLVCGNGDVGQLGLGEDILERKRLSPVAGIPDA
--I-----------K------------GA--R----------------------V-----
  |           |            ||  |                            
VDISAGGMHNLVLTKSGDIYSFGCNDEGALGRDTSEDGSESKPDLIDLPGKALCISAGDS
-S-----D--------F-------G----G--R------------SL-S-----------
 |     |        |       |    |  |            |  |           
HSACLLEDGRVFAWGSFRDSHGNMGLTIDGNKRTPIDLMEGTVCCSIASGADHLVILTTA
-----V----------LS--S-S-------------T--II--ANP--------------
     |          ||  | |             |  ||  | |              
GKVFTVGCAEQGQLGRLSERSISGEGRRGKRDLLRPTQLIITRAKPFEAIWATNYCTFMR
D-----I-----------------------P---E-------A-----------------
      |                       |   |       |                 
ESQTQVIWATGLNNFKQLAHETKGKEFALTPIKTELKDIRHIAGGQHHTVILTTDLKCSV
-----Y-------------------KL--R-----------------G----W-------
     |                   ||                    |    |       
VGRPEYGRLGLGDVKDVVEKPTIVKKLTEKIVSVGCGEVCSYAVTIDGKLYSWGSGVNNQ
F---DA----E--------------------G-----------Q-
    |     |                    |           | 
LGVGDGDDELEPIVVVSKNTQGKHMLLASGGGQHAIFLVKADKQD
1jmc 3mvd  183  238 1545  76.89  11.84
KVVPIASLTPYQSKWTICA-RVTNKSQIRTWSNSRG-EGKLFSLELVDESGEIRATAFNE
     |          ||  |   |      |   |  |  |    |        |    
----CA----------ICGDRSSGK-HYGVYS-CEGCKG-FFK-RTV-RK-DLTYTC-RD
QVDKFFPLIEVNKVYY--FSKGTLKIANKQFTAVKNDYEMTFNNETSVMPCEDDHHLPTV
  |        |   |    |  |         |  |   |         ||        
NKDCLIDKRQRNRCQYCRYQK-CLAMGMDELCVVCGD-KAT-GYHYRCITCE-G--CKGF
QFDFTGID-DLENKSKDSLVDIIGICKSYEDATKITVRSNNREVA-KRNIYLMDTSGKVV
 |  | |   |   |  |     | |    |  | | |    |   |  ||     |   
-FRRT-IQKNL-HPSY-S-CKYEGKC-VI-D--KVT-RNQCQECRFKKCIY-V---G--M
TATLWGEDADKFDGSRQPVLAIKGARVSDFGGRSLSVLSSSTIIANPDIPEAYKLRGWFD
 ||    |    | |    || |  |        |          |    |  | |    
-AT----DL-VLDDSKR--LA-K--R------K-L-I--EE----N---RE--KRRR-EE
AEGQ
 |  
LE-K
1jmc 2nll   53  238  169  22.27  31.36
KVVPIASLTPYQSKWTICARVTNKSQIRTWSNSRGEGKLFSLELVDESGEIRATAFNEQV
      |        ||      |   |  |||            |    |         
---D-NSV---E---TI--EL--K---R-GSNS-----VY-VQ-YD---DI--------M
DKFFPLIEVNKVYYFSKGTLKIANKQFTAVKNDYEMTFNNETSVMPCEDDHHLPTVQFDF
  ||   |       |  | |       |          |       |         |  
--FF---E-S-----S--T-K-SHR-LIA----H-L--DNR-QI---E---------F-Y
TGIDDLENKSKDSLVDIIGICKSYEDATKITVRSNNREVAKRNIYLMDTSGKVVTATLWG
 |   |   |   | |    |          |   ||     ||     |          
-G--NLKELSQ--LDDRFFRC--H-NSF-V-V---NR----HNI---E-S---I------
EDADKFDGSRQPVLAIKGARVSDFGGRSLSVLSSSTIIANPDIPEAYKLRGWFDAEGQ
 |  |    |     |    |  |          |    |       |          
-DS-K-E--R-----I----VY-FKNKE-HCY-AS--VRN--V-K--KI---------
1jmc 3bs1   41  238  102  17.23  40.20
KVVPIASLTPYQSKWTICARVTNKSQIRTWSNSRGEGKLFSLELVDESGEIRATAFNEQV
|  |     |  |                |         | |     ||     |    |
KWTP-----P-RSPFNLVQEIL--FH-DPW-KLL-IATIF-LNRT--SGKM---AI--PV
DKFFPLIEVNKVYYFSKGTLKIANKQFTAVKNDYEMTFNNETSVMPCEDDHHLPTVQFDF
       |  | |  |      |     |   |         |    |    |       
--LWEFLE--K-YP-S--A-EVA-R---AA--DW-----RDVS----E----L--LK-PL
TGIDDLENKSKDSLVDIIGICKSYEDATKITVRSNNREVAKRNIYLMDTSGKVVTATLWG
 |  ||    |      | | |   |    |          |  |     |        |
-GLYDL--RAK-T----I-I-K-FSD-EYLT-----KQ--WR--YPIELHG--I-GK-YG
EDADKFDGSRQPVLAI-KGARVSDFGGRSLSVLSSSTIIANPDIPEAYKLRGWFDAEGQ
   |     |           |       |          |    |  ||         
-N-DSY---R--IFCVNEWKQVHP-ENHKLNKY-HDWLWEN-H--E--KL-S-L-S---
1jmc 4evv   42  238  144  17.65  29.17
KVVPIASLTPYQSKWTICARVTNKSQIRTWSNSRGEGKLFSLELVDESGEIRATAFNEQV
        |  | |     |              || |      |   |   |    | |
--------TS-Q-K----HR--D-F-V---AEPMGE-K----P-V---GSL-A-GIGE-V
DKFFPLIEVNKVYYFSKGTLKIANKQFTAVKNDYEMTFNNETSVMPCEDDHHLPTVQFDF
     |    |     |  |      |     |          |        |   ||  
-----L---GK-----K--LE--ERGF-----D-K-AY-----VV-------L-G-QF-L
TGIDDLENKSKDSLVDIIGICKSYEDATKITVRSNNREVAKRNIYLMDTSGKVVTATLWG
     |  | |    |        ||          ||       | || |    |    
--V--L--K-K----D--------ED---L-F----RE------WLKDTCG----A----
EDADKFDGSRQPVLAIKGARVSDFGGRSLSVLSSSTIIANPDIPEAYKLRGWFDAEGQ
  | |   ||             | |     |            |      | ||   
-NA-K-Q-SRD-------C----F-G----CL-------R----E------WCDA-FL
1jmc 2bzf   46  238   87  19.33  52.87
KVVPIASLTPYQSKWTICARVTNKSQIRTWSNSRGEGKLFSLELVDESGEIRATAFNEQV
        |     |           |      |         |     |      ||  
--------T-H--LW--------EF-I------R-D-----I-LI-HP-EL-----NEGL
DKFFPLIEVNKVYYFSKGTLKIANKQFTAVKNDYEMTFNNETSVMPCEDDHHLPTVQFDF
 |     | |       |        |   |         |  |        |       
MK-W---E-NR--H--EG---V----F---K--F-L--RSE-AV--AQ----L------W
TGIDDLENKSKDSLVDIIGICKSYEDATKITVRSNNREVAKRNIYLMDTSGKVVTATLWG
 |      | | |          ||   |    |  |  | |  |            |  
-G----Q-KKKNS--N---M--TYE---KL---S--R--AMR--YYY--K-REI---L--
EDADKFDGSRQPVLAIKGARVSDFGGRSLSVLSSSTIIANPDIPEAYKLRGWFDAEGQ
|     || |   |  |      | |       ||               ||   |  
E---RVDG-RR--LVYK------F-GK-----NSS---------------GWKEEE-V
1jmc 3jtg   43  238   94  18.07  45.74
---K----VVP-IASL--T-PYQSK--W-TIC--AR-VT-N-K---S---QIR----T--
   |     ||       |     |     |   ||    | |        ||    |  
DLSKHPSGIVPTLQNIVSTVNLDCKLDLKAIALQARNAEYNPKRFAAVIMRIREPKTTAL
-WSNSR----G---E--GKL----FS-L-E-L---V---D---ES--G--E----IR---
          |   |   |            |       |       |       ||   
IFASGKMVCTGAKSEDFSKMAARKYARIVQKLGFPAKFKDFKIQNIVGSCDVKFPIRLEG
-A-T--AFNEQVDKFFP-LI---EVNK-V-YYF-S-K-G-T-LKIANKQFTAVKNDYEMT
 |    ||       || ||    | | |   | | |   |  |       |  | |   
LAYSHAAFSSYEPELFPGLIYRMKVPKIVLLIFVSGKIVITGAKMRDETYKAFENIYPV-
FNNETSVMPCE-DDH-H-L-PTVQ-FDFT-GID---DLE--N-KSKDSLVD---IIG-IC
   |    |     |     || |    |   |   ||                    | 
L-SEFRKIPVDLSKHPSGIVPTLQNIVSTVNLDCKLDLKAIALQARNAEYNPKRFAAVIM
KSYEDATKITVRSNNREV---AK-RNIYLMDT-S-GKVVTATLW-GEDAD-KF-D--GS-
   |  |          |   ||      |        |          | |     || 
RIREPKTTALIFASGKMVCTGAKSEDFSKMAARKYARIVQKLGFPAKFKDFKIQNIVGSC
--RQPV----LAIKGARV-S---D-FGG---R-SL-S-V-L---SSSTIIANPDI-PEAY
    |     ||   |   |     | |   |      | |   |    |       | |
DVKFPIRLEGLAYSHAAFSSYEPELFPGLIYRMKVPKIVLLIFVSGKIVITGAKMRDETY
K-LRGWFD--AE-GQ-
|          |    
KAFENIYPVLSEFRKI
1jmc 1qne   77  238  374  32.35  20.59
-K-VVP-I--AS--L-T-PY--Q--S--K--W----TI-C----A------R-V------
       |  ||       |  |        |     | |    |      | |      
IQGLLQFIKEASEPIHVRKYKGQVVAVDTYCWLHKGAIACAEKLAKGEPTDRYVGFCMKF
TN-------K-----------S--QI-RT-----WSN-SRG-----EGKL------F--S
 |       |           |     |        |   |     |||       |  |
VNMLLSHGIKPILVFDGCTLPSKKEVERSRRERRQANLLKGKQLLREGKVSEARECFTRS
--L-E-L---V-D--ES-G-E--I---RA-T--AF-NE----Q--V--DK----F-----
          |     | |         |    |  |     |     |     |     
INITHAMAHKVIKAARSQGVDCLVAPYEADAQLAYLNKAGIVQAIITEDSALLAFGCKKV
------F--PL-I------------EV---NKV-Y--------YF-S-KGT-L----KI-
      |   | |             |    |  |        |  |  |  |    |  
ILKMDQFGNGLEIDQARLGMCRQLGDVFTEEKFRYMCILSGCDYLSSLRGIGLAKACKVL
--ANK-QFT-AV-K-NDY-EM--T----F-N-----NET---S-V-------M-P--C-E
  ||         |   |  |  |      |     | |     |         |    |
RLANNPDIVKVIKKIGHYLKMNITVPEDYINGFIRANNTFLYQLVFDPIKRKLIPLNAYE
-D-D-----H---HL-PTV--Q----------F----DF---T-GIDD-L-------E--
 | |                 |          |    |    | ||   |       |  
DDVDPETLSYAGQYVDDSIALQIALGNKDINTFEQIDDYNPDTAGIQGLLQFIKEASEPI
N--KSK------DS---L----V------------D-IIGIC-K------SY--E-----
   | |      |    |                 |   | | |      |         
HVRKYKGQVVAVDTYCWLHKGAIACAEKLAKGEPTDRYVGFCMKFVNMLLSHGIKPILVF
D-AT---KITV-RS-------N-----N--RE--V--AK----R--N---------I---
|  |   |  | ||       |        ||  |  |     |  |         |   
DGCTLPSKKEVERSRRERRQANLLKGKQLLREGKVSEARECFTRSINITHAMAHKVIKAA
-----------Y-----L--MDTSG--K-VVT------A-----T-L----W--G-E-D-
           |     |      |      |      |       |       | | | 
RSQGVDCLVAPYEADAQLAYLNKAGIVQAIITEDSALLAFGCKKVILKMDQFGNGLEIDQ
A---------D-----KF---------D--------G---S----R---QP-VL-AI-K-
|         |     ||         |        |        |    |     | | 
ARLGMCRQLGDVFTEEKFRYMCILSGCDYLSSLRGIGLAKACKVLRLANNPDIVKVIKKI
G--AR----V-SDF-GG--R---S-L-S-V---LSSSTI-I-A-NPDI-PE----A--Y-
|        |  |   |  |     |   |        |   |   |  ||    |  | 
GHYLKMNITVPEDYINGFIRANNTFLYQLVFDPIKRKLIPLNAYEDDVDPETLSYAGQYV
--K--LR---G-----WFD-A-E-G-Q-
     |    |      |          
DDSIALQIALGNKDINTFEQIDDYNPDT
1jmc 3qe9  123  238  688  51.68  17.88
------KVV--PI---A--SL-----T-----P----Y--QSK-WT---IC-A--R----
                |   |     |          |  |    |   |  |  |    
TYSYLFRMISHEMKQKADQKLEQFDITNEQGHTLGYLYAHQQDGLTQNDIAKALQRTGPT
VTN--KS-Q----I-R-T-WSNS-R---G---EG-KL---F-S----LE--LV----DES
| |          | |        |   |    | ||   | |     |  ||     | 
VSNLLRNLERKKLIYRYVDAQDTRRKNIGLTTSGIKLVEAFTSIFDEMEQTLVSQLSEEE
GE-IRA------------T-A--F----NE--Q-VD-K---F-------------F----
 |   |            |    |     |  |  | |   |                  
NEQMKANLTKMLSSLQEFTYSYLFRMISHEMKQKADQKLEQFDITNEQGHTLGYLYAHQQ
P-L----I----E-----V-----N----K-VY-YF----S--K--G--T--LK-I-A-N
  |    |          |     |    |  | |        |  |  |   |   |  
DGLTQNDIAKALQRTGPTVSNLLRNLERKKLIYRYVDAQDTRRKNIGLTTSGIKLVEAFT
KQF-----TAV-K-N--DYE-M----T--FNN--E-T-S-----V---M--PC----E--
  |     | |        | |    |       | | |         |        |  
SIFDEMEQTLVSQLSEEENEQMKANLTKMLSSLQEFTYSYLFRMISHEMKQKADQKLEQF
D---D--H-------H-------------L----PTV-------Q-------F--D----
|      |       |             |    |||                  |    
DITNEQGHTLGYLYAHQQDGLTQNDIAKALQRTGPTVSNLLRNLERKKLIYRYVQDTRRK
--------------FTGI-D--D------L---EN---K---SK--------D---S-L-
              || | |         |   ||   |    |            | | 
NIGLTTSGIKLVEAFTSIFDEMEQTLVSQLSEEENEQMKANLTKMLSSLQSNEFTYSYLF
--V--------D--I----I----G--I--CKSY-EDA-TK--I--TV-R-----SN---
           |       |    |           |  |   |     |     ||   
RMISHEMKQKADQKLEQFDITNEQGHTLGYLYAHQQDGLTQNDIAKALQRTGPTVSNLLR
N--R-E-----V-AK--R-N-------I-----Y--L---MD-T-----S---G---KV-
|  |       | |   | |       |            |  |     |       |  
NLERKKLIYRYVDAQDTRKNIGLTTSGIKLVEAFTSIFDEMEQTLVSQLSEEENEQMKAN
VT----A----T---LW---G-E--D-AD-K---F------------------DG-----
 |         |   |      |    || |   |                  ||     
LTKMLSSLQEFTYSYLFRMISHEMKQKADQKLEQFDITNEQGHTLGYLYAHQQDGLTQND
-SR--Q---P-V---LA-I--KG-A-R-V-S-D-----FG----G-R-------------
     |   | |   |     |    | |   |      |    |               
IAKALQRTGPTVSNLLRNLERKKLIYRYVDAQDTRRKNIGLTTSGIKLVEAFTSIFDEME
----S-LS-------------VLSS-S---T---I---I-------A----------N--
    | ||              ||| |   |       |       |          |  
QTLVSQLSEEENEQMKANLTKMLSSLSNEFTYSYLFRMISHEMKQKADQKLEQFDITNEQ
----------------P-DI--------P---------E------AY--------K---L
                  ||        |         |       |        |   |
GHTLGYLYAHQQDGLTQNDIAKALQRTGPTVSNLLRNLERKKLIYRYVDAQDTRRKNIGL
--RG------W---FD----------A----E-----------G-Q
   |          ||               |             |
TTSGIKLVEAFTSIFDEMEQTLVSQLSEEENEQMKANLTKMLSSLQ
1jmc 4lln  138  238  826  57.98  16.71
--------------------------------------K------V--------------
                                      |      |              
ASSDLTDYVIRQLGRTKNKRYEAYVVSRIIHLLNDFTLKFVTQQFVRLSNKKIALTDLYF
--------V---------------------P---I------A-------SLT--------
        |                     |   |      |       | |        
PQLGIHIEVDEGHHFLRNSKMEYSLNQIDEPLYSISQTESDAMREEDIISITGHKIFRVN
--------P------Y-Q------------------S--K-W---------T-I-CAR--
        |        |                  |  | |         | |   |  
VFKNQEGQPQNLENIHQQIDKIIEEIKTAKNKLIEASTFKEWNIETEYNPQTYIDLGRIS
-----V---T----N------KS-Q----I----R-T--W------S----N--S-RG--
     |   |    |      |  |           |  |           |  |  |  
LADNVVLKTTKDVCNCFGYSYKNYQRGGALHPYKKDTLIWFPRLYENKDWINTISPDGLT
----------------E---G--K-L-F--------S--------L-E-----L------
                |   |  |   |        |        | |     |      
ITEKSTDETITLKKLEEWKNGPQKRIVFARVKDNLSSRAMYRFMGLYEFQKADLKDGAVW
--V-DE--------SG---E--IR--A-T------AF---------N--------EQ-V-
  |  |        |       ||    |      |          |         | | 
KRVKSEVQTYSPKASSDLTDYVIRQLGRTKNKRYEAYVVSRIIHLLNDFTLKFVTQQFVR
--D-K------FFP-L---IEV--------N-KV-Y---------Y--------------
    |       || |   |||        | |  |         |              
LSNKKIALTDLYFPQLGIHIEVDEGHHFLRNSKMEYSLNQIDEPLYSISQTESDAMREED
---------F--S--K---G---TL--------K----I--A-NK--Q---F--------
         |     |   |    |        |    |  | ||      |        
IISITGHKIFRVNVFKNQEGQPQNLENIHQQIDKIIEEIKTAKNKLIEASTFKEWNIETE
----T---------A---V----K---N-------DYE----M------T---F-----N
    |         |   |    |   |        |            |   |     |
YNPQTYIDLGRISLADNVVLKTTKDVCNCFGYSYKNYQRGGALHPYKKDTLIWFPRLYEN
----N---------------E--T-------------------------S--V---M---
    |               |  |                         |      |   
KDWINTISPDGLTITEKSTDETITLKKLEEWKNGPQKRIVFARVKDNLSSRAMYRFMGLY
------------------------PCE----D--D----------------H------H-
                        | |    |  |                       | 
EFQKADLKDGAVWKRVKSEVQTYSPKEKASSDLTDYVIRQLGRTKNKRYEAYVVSRIIHL
L-P-T---V--QF-----------D--F--TG--I--DD----LEN-K---S--K-D---
|   |   |  ||           |  |   |  |  |     | | |   |    |   
LNDFTLKFVTQQFVRLSNKKIALTDLYFPQLGIHIEVDEGHHFLRNSKMEYSLNQIDEPL
-SL-------V---D-I-I-G--I----C-K----------S-Y-E-D------------
 |            | | | |  |      |                |            
YSISQTESDAMREEDIISITGHKIFRVNVFKNQEGQPQNLENIHQQIDKIIEEIKTAKNK
---A-T-K---I-------T-V---R-S--NN------REV------A-K---R-N-I--
   | | |   |       |     | |   |        |        |   |      
LIEASTFKEWNIETEYNPQTYIDLGRISLADNVVLKTTKDVCNCFGYSYKNYQRGGALHP
Y----L-----M----D---T-S--G-----K-V-VTAT---L--W--G-E---------
|    |          |   | |  |     |    | |   |  |  |           
YKKDTLIWFPRLYENKDWINTISPDGLTITEKSTDETITLKKLEEWKNGPQKRIVFARVK
D-----A--------D--K--F-DGS---R-----Q---P-V---L---AIK--G-----
|     |           |    ||    |     |   |     |    |   |     
DNLSSRAMYRFMGLYEFQKADLKDGAVWKRVKSEVQTYSPKASSDLTDYVIRQLGRTKNK
---A----R-----------------V--S-------D--F---G-------G----R-S
   |    |                 |  |       |  |   |       |    | |
RYEAYVVSRIIHLLNDFTLKFVTQQFVRLSNKKIALTDLYFPQLGIHIEVDEGHHFLRNS
-L--S---V---L---S---S---------S-T---I--I-A--N----P----------
    |       |   |   |         | |   |       |    |          
KMEYSLNQIDEPLYSISQTESDAMREEDIISITGHKIFRVNVFKNQEGQPQNLENIHQQI
D-----------------------I-----P-----------------------------
|                       |     |                             
DKIIEEIKTAKNKLIEASTFKEWNIETEYNPQTYIDLGRISLADNVVLKTTKDVCNCFGY
-----E---A---Y-K--L----R--------------G-------------------W-
         |   | |  |    |              |                   | 
SYKNYQRGGALHPYKKDTLIWFPRLYENKDWINTISPDGLTITEKSTDETITLKKLEEWK
--------F----D-----A--------E--------G----------Q-----
        |    |     |        |        |          |     
NGPQKRIVFARVKDNLSSRAMYRFMGLYEFQKADLKDGAVWKRVKSEVQTYSPK
1jmc 4par  176  238 1254  73.95  14.04
------K--V--------V----P-I------A----SL--T--------PY----Q--S
                       |        |     |  |        |         
LPHGHMQTLIFLNLEATGLPSSRPEVTELCLLAVHRRALENTSISQGHPPPVPRPPRVVD
KWT--I-----C---A-RVT--NKS--QI--R-TW-SN-S---RG------E--------
|    |     |   |   |   |       |     |     |                
KLSLCIAPGKACSPGASEITGLSKAELEVQGRQRFDDNLAILLRAFLQRQPQPCCLVAHN
G-KL-FS-L--E---------L-----VD--------E--S-G--E------I--R----
|    |  |  |         |     ||        |  | |         |  |    
GDRYDFPLLQTELARLSTPSPLDGTFCVDSIAALKALEQASNGSRKSYSLGSIYTRLYWQ
A-----TA------------FN-E---Q-VD---K-F------F----P------LI---
|     ||                   | ||     |           |      ||   
APTDSHTAEGDVLTLLSICQWKPQALLQWVDEHARPFSTVKPMYGTTLPHGHMQTLIFLN
--------------E-----V------N-KV---Y----------Y--FS------K---
              |     |      |                     |      |   
LEATGLPSSRPEVTELCLLAVHRRALENTSISQGHPPPVPRPPRVVDKLSLCIAPGKACS
-G----T-L-K----IANKQ-F--T-AV-------K----------N-D-Y-------E-
 |    | | |        | |    |                   | | |       | 
PGASEITGLSKAELEVQGRQRFDDNLAILLRAFLQRQPQPCCLVAHNGDRYDFPLLQTEL
--------M--TF--NN-------E---------T--SV---M----P------------
           ||           |            |         |            
ARLSTPSPLDGTFCVDSIAALKALEQASSPRKSYSLGSIYTRLYWQAPTDSHTAEGDVLT
----C--------E--DDH-H----L-P---T-----VQ---F-DF--TGI-----D--D
    |           | |        |   |      |   |     ||          
LLSICQWKPQALLQWVDEHARPFSTVKPMYGTLPHGHMQTLIFLNLEATGLPSSRPEVTE
----------LEN-K-S-----------K--D--SL-V-----------DIIGICKS---
          |||   |              |  ||              | |  |    
LCLLAVHRRALENTSISQGHPPPVPRPPRVVDKLSLCIAPGKACSPGASEITGLSKAELE
------YED--ATKI-T-V-R--------S-N-NR--------E---------------V
        |  |        |          |  |        |               |
VQGRQRFDDNLAILLRAFLQRQPQPCCLVAHNGDRYDFPLLQTELARLSTPSPLDGTFCV
----A-K---------R------NIY--L--M---D--TS-GKVVT----------ATL-
    | |         |       ||  |      |  |  | | |          | | 
DSIAALKALEQASSGSRKSYSLGSIYTRLYWQAPTDSHTAEGDVLTLLSICQWKPQALLQ
W-GEDA---D--K----------------F---D--G---S--------------R----
|  | |      |                |      |   |              |    
WVDEHARPFSTVKPMYGTTLPHGHMQTLIFLNLEATGLPSSRPEVTELCLLAVHRRALEN
----Q---------P--V--LA--I---K----GA-RV---S--DF---G-GR---SLSV
    |         |  |  |   |   |    ||      |       |  |    |  
TSISQGHPPPVPRPPRVVDKLSLCIAPGKACSPGASEITGLSKAELEVQGRQRFDDNLAI
-L-S----S-S--TIIA-N-P--DIP----E-A-----------Y--------K-L----
 |              | |    | |    | |                    | |    
LLRAFLQRQPQPCCLVAHNGDRYDFPLLQTELARLSTPSPLDGTFCVDSIAALKALEQAS
R-----G-------W---FD---AEG-----------------Q----------------
|     |       |    |   |||                 |                
RKSYSLGSIYTRLYWQAPTDSHTAEGDVLTLLSICQWKPQALLQWVDEHARPFSTVKPMY
--
  
GT
1jmc 4ynq  133  238  902  55.88  14.75
KVVPIASLTPYQSKWTICARVTNKSQIRTWSNSRGEGKLFSLELVDESGEIRATAFNEQV
 |  |  | |       |    |       | | | |  |              | |   
MVEDI--LAP-GLRVVFCG-I-NPG-L---S-SAGTG--F--PF---A---H-PA-N---
DKFFPLIEVNKVYYFSKGTLKIANKQFTAVKNDYEMTFNNETSVMPCEDDHHLPTVQFDF
  |           |    ||    |      ||       |       |   ||||   
-RFWK-V-IYQA-GFTDRQLKPQEAQH-LL--DYR-C--GVTKLV----D-R-PTVQANE
TGIDDLENKSKDSLVDIIGICKSYEDATKITVRSNNREVAKRNIYLMDTSGKVVTATLWG
     |       |     |   |                |   |    |     |  ||
VSKQELHAGGR-KLIE--KI-EDYQPQA-LAI------LGKQ-AYEQGFSQR--GAQ-WG
EDADKFDGSRQPVLAIKGARVSDFGGRSLSVLSSSTIIANPDIPEAYKLRGWFD-AEGQ
       || |          |   |  ||  |           |||  |   | |   
KQTLTI-GSTQ-IWVLPNP--S---G--LSRVSLEK-L----V-EAY--RE-LDQALVV
1jmc 1mwi   50  238  165  21.01  30.30
KVVPIASLTPYQSKWTICARVTNKSQIRTWSNSRGEGKLFSLELVDESGEIRATAFNEQV
      |     | |    |          | |     ||      |  ||        |
------S---H-S-WR-HIR-A-EG-L-D-S-SY-T-VLFG-K-A-EADEI-FQELEKEV
DKFFPLIEVNKVYYFSKGTLKIANKQFTAVKNDYEMTFNNETSVMPCEDDHHLPTVQFDF
   |       |  | |       || |        ||   |   |       | |    
E-YF-TGALARVQVFGKWH-SVPRKQATYGDAGLTYTFSGLT-LSP-K-P-WIP-V-LER
TGIDDLENKSKDSLVDIIGICKSYEDAT-KI-TVRSNNREVAKRNIYLMDTS-GKVVTAT
   |                   | |    |   |   || |         | |      
IR-DHVSGVTGQTF-NFV-LINRYKDGSDHIGEHRDDCRELAPGS-PIASVSFGASRDFV
LWGEDA-DKFDGSRQPVLAIKGARVSDFGGRSLSVLSSSTIIA-NPDIPEAYK-L--R-G
    |   |   ||  | |    |     | ||      |        |   | |  |  
FRHKDSRGK-SPSRR-V-AV--VRLPLAHG-SLLMMNHPTNTHWYHSLPVRKKVLAPRVN
-WFDAEGQ
  |     
LTFRKILL
1jmc 3h8o   51  238  205  21.43  24.88
----K-----V---VPIAS----L---T------PY---QS---KW--T----IC-A--R
              |   |    |   |      |     |    |  |           
SAAQRQGALAIMSRVYVGSIYYELGEDTIRQAFAPFGPIKSIDMSWDVTKHKGFAFVEYE
VTNKSQIR-TWSNS-R-GEG-KL-F-S-L---E-LVDE-SGEIRA-T-AF--N-EQ-V--
|    |      ||   |   |    |         |    | ||          |    
VPEAAQLALEQMNSVMLGRNIKVGRPSNIGQAQPIIDQLAEEARAFNRIYVASVHQDLSD
-D-K--F--F-PL----I--E--V--NKVY-Y--FSKG-TLK--I-A-N--K---QFTAV
 | |  |  |                 | |      |           |      |   |
DDIKSVFEAFGKIKSATLARDPTTGKHKGYGFIEYEKAQSSQDAVSSMNLFDLGGQYLRV
-K--N-DYE-MT---FNNE-T-SVMP-C-EDD-HH-L--PTV-Q-F-DF---TGID---D
 |         |            |           |   |  | |  |     ||   |
GKAVTPPMPLLTPSAAQRQGALAIMSRVYVGSIYYELGEDTIRQAFAPFGPIKSIDMSWD
-LENKSKD-SLVDI-I-GICK-SYEDATKITVRSNNREVAK-RNI---Y-LMDTSGKVVT
    | |    |            |          |  |    ||       |       
SVTMKHKGFAFVEYEVPEAAQLALEQMNSVMLGGRNIKVGRPSNIGQAQPIIDQLAEEAR
A-T-LW-GE-DADKFDGSRQPVL-A---IKGARVS-D--FG---GRS-L---SVLSS-ST
|           |  |     |  |   || |    |   |   |          ||   
AFNRIYVASVHQDLSDDDIKSVFEAFGKIKSATLARDPTTGKHKGYGFIEYEKAQSSQDA
IIA-NP-DIPEAYKLR-G-WFDAE-G-Q
    |  |    | || |          
VSSMNLFDLGGQY-LRVGKAVTPPMPLL
1jmc 2qfj   69  238  387  28.99  17.83
--KV-----VPIA-S------L-------TP---Y--------------------Q--SK
         |||         |        |   |                    |  ||
TYRIGNGASVPISNTGELIKGLRNYGPYEVPSLKYNQIALIHNNQFSSLINQLKSQISSK
----W-------T--I--C----A-R--V-----T------------N-------K----
    |          |            |     |            |       |    
IDEVWHIHNINISEFIYDSPHFDSIKSQVDNAIDTGVDGIMLVLPEYNTPLYYKLKSYLI
----SQ-----I---R--T------------------W-SN---SRG-E-----G--K--
    ||     |   |  |                  |  |     |       |     
NSIPSQFMRYDILSNRNLTFYVDNLLVQFVSKLGGKPWILNVDPEKGSDIIIGTGATRID
---L------F-----------S-L----E----L-------V----------D-E----
   |      |           |      |    |       |          | |    
NVNLFCFAMVFKKDGTMLWNEISPIVTSSEYLTYLKSTIKKVVYGFKKSNPDWDVEKLTL
--S--------GE--I---------------R----A------T-AF---N-E--QV---
  |        ||  |               |    |      |  |     |   |   
HVSGKRPKMKDGETKILKETVEELKKQEMVSRDVKYAILHLNETHPFWVMGYEGTKVKLS
DK-F----------F-PL-IE-V--N----K----V-------YYFSK----G-------
 |              ||  | |  |         |       || ||    |       
SKRYLLTLLQMVTPIKPLSVEIVSDNWTSEEYYHNVHEILDEIYYLSKMNWRGFRSRNLP
-TL---K-----IA--N-------K--Q----F--T------A-V---------K---N-
 |    |     ||  |          |    |  |      | |         |   | 
VTVNYPKLVAGIIANVNRYGGYPIRSLQTNPWFLLTYRIGNGASVPISNTGELIKGLRNY
-DYEM-T--F-------NNE-TS-V--MPCE-----DD--H-H-------L---P---TV
  ||             ||   |             |   | |           |     
GPYEVPSLKYNQIALIHNNQFSSLINQLKSQISSKIDEVWHIHNINISEFIYDSPHFDSI
--QFD--F-TGIDD----L-E-N-------K--------S---K-D-SL---VD--IIG-
  | |    || |     | | |       |        |     |  |   ||      
KSQVDNAIDTGVDGIMLVLPEYNTPLYYKLKSYLINSIPSQFMRYDINLTFYVDNLLVQF
ICK---S-Y--E-DATK-----I-T--VR-SN-N----REVAKR------N----I----
  |          |  |     | |   |  | |      | |       |    |    
VSKLGGKPWILNVDPEKGSDIIIGTGATRIDNVNLFCFAMVFKKDGTMLWNEISPIVTSS
-YL--M-DTSGKVV----TATL-WG-E------DA--DKF-DG-S---RQPV--L-----
 ||     |  |||         |  |           |  ||        |  |     
EYLTYLKSTIKKVVYGFKKSNPDWDVEKLTLHVSGKRPKMKDGETKILKETVEELKKQEM
-A--IKGA--RVSD---F---G--G---R--S----LSVL--S--S--ST-IIA-N----
     | |         |   |  |      |    |  |        |  |   |    
VSRDVKYAILHLNETHPFWVMGYEGTKVKLSSKRYLLTLLQVTPIKPLSVEIVSDNWTSE
P------DI-PEAYKL-R-GW--F---------D---------A---E--G-----Q---
        |  | | |    |  |                   |      |     |   
EYYHNVHEILDEIYYLSKMNWRGFRSRNLPVTVNYPKLVAGIIANVNRYGGYPISLQTNP
---
   
WFL
1jmc 2w42  134  238  783  56.30  17.11
KVV--PI--ASLTP-Y--QS-KWTICARVTNKS-QI-R-TWSNS-RG-E-GKLFS-L-EL
               |  |  |  || |  |   |           |   ||    |  |
MLLTGKLYKEEKQKFYDAQNGKCLICQRELNPDVQANHLDHDHELNGPKAGKVRGLLCNL
VDES-GEIRATAFNEQ-V-DKFFPLIE-V-NKV-YY---FSKGTL--K-IA--NKQFTAV
 |   |      ||            |   |   |                   | |   
CDAAEGQMK-HKFNRSGLKGQGVDYLEWLENLLTYLKSDYTQNNIHPNFVGDKSKEFSRL
-KND-Y-EM--T-FN-NE--TSV-MPCEDDHHL-PTVQFDFTGIDDLENKSK--DSLVDI
 |     ||    |  ||  |           |        ||    | | |  |     
GKEEMMAEMLQRGFEYNESDTKTQLIASFKKQLRKSLKMLLTGKLYKEEKQKFYDAQNGK
IGIC-KSYE-D--ATKIT-VRS-NNREVAK-RNIY--LMDTS-G--K-VVTAT-LWGEDA
  ||      |  |         |     | |     | |   |  |       | |   
CLICQRELNPDVQANHLDHDHELNGPKAGKVRGLLCNLCDAAEGQMKHKFNRSGLKGQGV
DKFDGSRQPVLAIKG--AR--V-SDF-GGRS--LSVLSSSTIIAN--P---DIPEA-YK-
|            |           | |  |   | |      |          |   | 
DYLEWLENLLTYLKSDYTQNNIHPNFVGDKSKEFSRLGKEEMMAEMLQRGFEYNESDTKT
-LRGWF--D-AEG-Q
 |   |         
QLIASFKKQLRKSLK
1jmc 2qnc   61  238  314  25.63  19.43
----KV---V----PI--A-----S-LTP------Y-------------Q--SKW----T
    |          |  |       | |      |             |  | |    |
MGSTKLKGDIAQQAAIMRALKMGWGVLKPLGDRLSYDLVFDVEGILLKVQVKSSWKSEKT
---IC--ARV-TNKSQI-RT-W-SN--S-R-G--EG-KL--------F-SL--E--LV--
        |  ||   | |     |         |   |        | |   |  ||  
GNYVVDNRRTRTNRRNIVRSPYRGNDFDFAVAYVEELELFYVFPVDVFISYGSEIHLVET
D--E----S-G--E----I--R--A-----TAF--N--EQ--V--D-KF-FPLIE-V-NK
|       | |  |    |     |     |        |       |            
DKRQRKPRSFGYREAWHLILQKGAAQKEGSTKLKGDIAQQAAIMRALKMGWGVLKPLGDR
V-Y--YFS-KG-TLKIANK-QFTAVK--N---DYEMTFNNETSVM--PC--ED-DH---H
  |   |   |  ||   |      |  |   |   |  |       |    | |     
LSYDLVFDVEGILLKVQVKSSWKSEKTGNYVVDNRRTRTNRRNIVRSPYRGNDFDFAVAY
LPTVQ----F--D-F-T-G--I---D-D--------L---E--N----K--S-KD---S-
         |  | |   |  |     |            |       |    |    | 
VEELELFYVFPVDVFISYGSEIHLVETDKRQRKPRSFGYREAWHLILQKGAAQKETMGST
-LV-DI-----I--------GICK------SYE---D--A--TKITV----RS----N--
 |  ||     |        |  |      ||    |      |  |     |    |  
KLKGDIAQQAAIMRALKMGWGVLKPLGDRLSYDLVFDVEGILLKVQVKSSWKSEKTGNYV
--N---R----E--VA--KR-NI-YL--MDT--S-G-KV--V-T-------ATL-----W
  |   |       ||        |    |   | |     | |               |
VDNRRTRGNDFDFAVAYVEELELFYVFPVDVFISYGSEIHLVETDKRQRKPRSFGYREAW
------G----E-DADKFDG--SRQ-PVL-AIK---G-----A-RVS-D--FG--GRSLS
      |    |    |  |    |     | |   |       | | |  |   |  | 
HLILQKGAAQKETSSTKLKGDIAQQAAIMRALKMGWGVLKPLGDRLSYDLVFDVEGILLK
V-L-SS--S--T---II---ANP-D-------------I-P-E---AY--K--L------
|   ||  |  |         |  |               |      |     |      
VQVKSSWKSEKTGNYVVDNRGNDFDFAVAYVEELELFYVFPVDVFISYGSEIHLVETDKR
----R--G----W-FDAE-G--Q----
    |  |    |      |  |    
QRKPRSFGYREAWHLILQKGAAQKETS
1jmc 2ost  109  238  567  45.80  19.22
---K----------V---V--P----I----A----------------S-LT--------
   |              |  |         |                | ||        
SFIKPIYQDINSILIGQKVKRPKSGTLSGHAAGEPFEKLVYKFLKENLSDLTFKQYEYLN
------P--------YQ-----------S--K-----W------------T--I-CAR--
      |        |            |  |     |            |  |      
DLFMKNPAIIGHEARYKLFNSPTLLFLLSRGKAATENWSIENLFEEKQNDTADILLVKDQ
------V-T-N--KS-Q----I---R---T---------------------WS-N-----
      | | |  || |    |       |                     |  |     
FYELLDVKTRNISKSAQAPNIISAYKLAQTCAKMIDNKEFDLFDINYLEVDWELNGEDLV
----S-----RGE-GKLF-----SLEL---V-D-ESG-E-IR---A-T--A-F--N-EQ-
    |       |   |             | |   |    |   |      |    || 
CVSTSFAELFKSEPSELYINWAAAMQIQFHVRDLDQGFNGTREEWAKSYLKHFVTQAEQR
----VD---K-F------F--P--------LI---------------------E--V---
     |   | |      |  |        ||                     |  |   
AISMIDKFVKPFKKYILSFIKPIYQDINSILIGQKVKRPKSGTLSGHAAGEPFEKLVYKF
---N------KVY-Y----FSK-----G-----------T----L---KIA--N-K-Q--
   |      | | |    | |     |           |    |   | |  |      
LKENLSDLTFKQYEYLNDLFMKNPAIIGHEARYKLFNSPTLLFLLSRGKAATENWSIENL
F------TA----VKND-YE-M---TFN---N-E--T--SV--M--PC-------E-D--
|      ||    ||   ||     | |           |       |       | |  
FEEKQNDTADILLVKDQFYELLDVKTRNISKSAQAPNIISAYKLAQTCAKMIDNKEFDLF
D--H-------H-------------L----PT-----------VQF-----D--FTG---
|                        |    |             ||     |  | |   
DINYLEVDWELNGEDLVCVSTSFAELFKSEPSELYINWAAAMQIQFHVRDLDQGFNGTRE
----------I---D-------D--LE--NK--S--K----D--S-LV-D-I-------I
                      |       |  |  |    |  | |             
EWAKSYLKHFVTQAEQRAISMIDKFVKPFKKYISFIKPIYQDINSILIGQKVKRPKSGTL
-----G------I---CK---S------YE---D------A-----T--KI----T----
     |           |   |      ||   |      |        |     |    
SGHAAGEPFEKLVYKFLKENLSDLTFKQYEYLNDLFMKNPAIIGHEARYKLFNSPTLLFL
V-R--------S--N------N--------R----E---V-----AK--R--N-I--Y-L
  |        |  |      |             |   |      |     | |  | |
LSRGKAATENWSIENLFEEKQNDTADILLVKDQFYELLDVKTRNISKSAQAPNIISAYKL
------M---------D-----T----SGK--V-V-T--A-------T-L---W------
      |         |           |   | | |  |         |   |      
AQTCAKMIDNKEFDLFDINYLEVDWELNGEDLVCVSTSFAELFKSEPSELYINWAAAMQI
------------G---E-------------D--A----D-------K----F------D-
            |   |                |    |       |    |      | 
QFHVRDLDQGFNGTREEWAKSYLKHFVTQAEQRAISMIDKFVKPFKKYILSFIKPIYQDI
-----G---SR------------QP----V-------LA------------I--K-----
     |    |             |    |       |                |     
NSILIGQKVKRPKSGTLSGHAAGEPFEKLVYKFLKENLSDLTFKQYEYLNDLFMKNPAII
G--AR--V--S-D--F--G-GR------S---L--------S----V-------L-----
|  ||     |    |    |       |   |             |       |     
GHEARYKLFNSPTLLFLLSRGKAATENWSIENLFEEKQNDTADILLVKDQFYELLDVKTR
--S-S-------S------T----I---------I----A----N-PD---I--------
  | |       |      |    |         |         |  |            
NISKSAQAPNIISAYKLAQTCAKMIDNKEFDLFDINYLEVDWELNGEDLVCVSTSFAELF
---P-E-------A----Y--K-L-R---G----W-------F--DAE----G-------
   | |       |         |     |    |       |   ||            
KSEPSELYINWAAAMQIQFHVRDLDQGFNGTREEWAKSYLKHFVTQAEQRAISMIDKFVK
---Q-
     
PFKKY
1jmc 1tw8  153  238 1025  64.29  14.93
--KVVPIASLT-PYQSKWTICARVTNKSQIRTWSNSRGEGKLFSLELVDES-GEIRATAF
  ||     ||     |            |     ||     |     |   ||     |
FNKVIMVGRLTRNVELKY-LPSG-SAAATIGL-ATSR---R-FKKQ--DGTLGE-E-VCF
NEQVDKFFPLIEVNKVYYFSKGTLKIANKQFTAVKNDYEMTFNNETSVMPCEDDHHLPTV
      |    |     | |||         |     ||      |         |  | 
ID-ARLFGRTAEIAN-QYLSKGSSVLIEGRLT-----YE-SWMDQTG--K-KNSRH--TI
QFDFTGIDDLENKSKDSLVDIIG-ICKSYEDATKITVRSNNREV--A-KRNIYLMD-TSG
  |         ||    |   |      |        |       |  |     | | |
TAD-S-LQFMDKKSMFNKVIMVGRLTRNVE-LKYLPSGSAAATIGLATSRRFKKQDGTLG
-KV--VTATLWGEDADKFDGSRQPVLAIKGARVSDFGGR-SLSVLSSSTIIANP-DIPEA
  |    | | |  |       |  |  ||  |    ||         |   |      |
EEVCFIDARLFGRTAE-I--ANQ-YLS-KGSSVL-IEGRLTYESWMDQTGKKNSRHTITA
YKLRGWFDAEGQ
  |   |     
DSLQ--F-MD--
1jmc 2vw9   54  238  214  22.69  25.23
KVVPIASLTPYQSKWTICARVTNKSQIRTWSNSRGEGKLFSLELVDES-GEIRATAFNEQ
 |    | |   |       || |   |  |        |   |              |
[truncated: 82,528,050 more chars]
