# Supplementary material for: DeepDISE: DNA Binding Site Prediction Using a Deep Learning Method
Source: Int J Mol Sci. 2021 May 24;22(11):5510. doi: 10.3390/ijms22115510 (PMC8197219; doi:10.3390/ijms22115510)
Supplement: Supplementary file 1 [file ijms-22-05510-s001.zip › Supplementary-3_sequence alignment training vs DNA62.txt]

C. Pairwise sequence alignment between structures in the training set and PDNA62 test set

KVVPIASLTPYQSKWTICARVTNKSQIRTWSNSRGEGKLFSLELVDESGEIRATAFNEQV
    | |       | |     |            |  | ||| |  | | |        
DAITIHSI--L-D-W-I--E-DN---L--------ESPL-SLEKV--S-E-R-SGYS---
DKFFPLIEVNKVYYFSKGTLKIANKQFTAVKNDYEMTFNNETSVMPCEDDHHLPTVQFDF
 |   |        | | |      |         ||   |            |      
-KWH-L-Q--RM--FKKETGHSLG-QY--IRS-RKMT---EIA-QKLKESNE-P-I-L-Y
TGIDDLENKSKDSLVDIIGICKSYEDATKITVRSNNREVAKRNIYLMDTSGKVVTATLWG
      |           |   |    |  | |       | | |  |     |      
--L--AE---R------YGF-ES-QQ-T-LT-RT----F-K-N-Y-FD-----V-PP---
EDADKFDGSRQPVLAIKGARVSDFGGRSLSVLSSSTIIANPDIPEAYKLRGWFDAEGQ
    |    |       |   |    |    |           |    |         
H---KY---R--MTNMQG-E-S----R-F--L-------H---P----L---------
1jmc 1bl0   43  238  116  18.07
KVVPIASLTPYQSKWTICARVTNKSQIRTWSNSRGEGKLFSLELVDESGEIRATAFNEQV
               |    |    |   |           | | |   |   ||  | |
---------------T----V----Q---W-----------L-L-D-NYE---TA--EGV
DKFFPLIEVNKVYYFSKGTLKIANKQFTAVKNDYEMTFNNETSVMPCEDDHHLPTVQFDF
    |          |  ||           | |                 |    |   
-S-LP-----R----S--TL------Y----NHY-L--------L------H--S-Q---
TGIDDLENKSKDSLVDIIGICKSYEDATKITVRSNNREVAKRNIYLMDTSGKVVTATLWG
      |   |  |        |     |   ||    |       |   |      |  
------E-Q-K--L-EPVN-AASF--G-KL-IRS----V-----F-M---G------L--
EDADKFDGSRQPVLAIKGARVSDFGGRSLSVLSSSTIIANPDIPEAYKLRGWFDAEGQ
         |   |   | |     |       |            | ||    |   
----R---TRR--L---GTR-----G------NSK--Y-H--Y---YGLR--IKA---
1jmc 1dp7   41  238   76  17.23
KVVPIASLTPYQSKWTICARVTNKSQIRTWSNSRGEGKLFSLELVDESGEIRATAFNEQV
   |    |   |     ||   |   |   |   |       |     | |      | 
R--P--R-TAFSSE-QL-ARL--K---REF-N---ENR-Y---L---T-E-R--R-RQQL
DKFFPLIEVNKVYYFSKGTLKIANKQFTAVKNDYEMTFNNETSVMPCEDDHHLPTVQFDF
     |   |      |      ||   | |           |  |        |    |
SS--EL-GLNEA-QI-K--IWFQNKR--A-K----I---KK-S-RP-----R--TA---F
TGIDDLENKSKDSLVDIIGICKSYEDATKITVRSNNREVAKRNIYLMDTSGKVVTATLWG
     |       |       |  |          | |   |  ||          |   
SS-EQL---AR--L-------KR-E----F-----N-E--NR--YL----------T---
EDADKFDGSRQPVLAIKGARVSDFGGRSLSVLSSSTIIANPDIPEAYKLRGWFDAEGQ
|        ||  |       |   |  |       |        | |          
E---R---RRQQ-L----S--SEL-G--LNE-AQIKIWFQ-N-KRA-KIK-----K-S
1jmc 1hdd   44  238  114  18.49
KVVPIASLTPYQSKWTICARVTNKSQIRTWSNSRGEGKLFSLELVDESGEIRATAFNEQV
       |     | |     ||    |     |   |              ||   |  
----M-EL---KRK-T-----TN-AD-R-----R---K---------A----AT-MRER-
DKFFPLIEVNKVYYFSKGTLKIANKQFTAVKNDYEMTFNNETSVMPCEDDHHLPTVQFDF
     |  ||    |   |||      |   |       |     |      |       
-R--RLSKVNEA--F-E-TLK---RS-TS-SN----P--NQ-R-LP-KVE-ILRNA-IRY
TGIDDLENKSKDSLVDIIGICKSYEDATKITVRSNNREVAKRNIYLMDTSGKVVTATLWG
  |  |     |              |   | |   |   | |     |  |    |   
--IEGLQALLRDT-TN-AD--RR-K-AA--TMR-ERRRLSKVN-EAFETL-K--RST---
EDADKFDGSRQPVLAIKGARVSDFGGRSLSVLSSSTIIANPDIPEAYKLRGWFDAEGQ
         | |    |         |          |       |  ||   |    
-SSNP-N-QRLP----K-VEI--L--RN-AI----RYI-E-GL-QAL-LR---D----
1jmc 1mdy   44  238  130  18.49
KVVPIASLTPYQSKWTICARVTNKSQIRTWSNSRGEGKLFSLELVDESGEIRATAFNEQV
    | |     ||     |     |     |   |  |     |   |    |      
S---ISS-R-VKSK-----RI----QLGL--N-QAE--L-A-QKV---G----TT-QQSI
DKFFPLIEVNKVYYFSKGTLKIANKQFTAVKNDYEMTFNNETSVMPCEDDHHLPTVQFDF
     | | |      | | |     |       |        |     |  |       
EQ---L-E-N-----GK-T-K--RPRF--L--P-ELA--SALGV-SV--D-WL--LN-G-
TGIDDLENKSKDSLVDIIGICKSYEDATKITVRSNNREVAKRNIYLMDTSGKVVTATLWG
| |     |||       |     | | |  |             |    ||    |   
TSISS-RVKSK-R-IQ-LGLNQA-ELAQK--VGTTQQSI-EQ---L-E-NGK----T---
EDADKFDGSRQPVLAIKGARVSDFGGRSLSVLSSSTIIANPDIPEAYKLRGWFDAEGQ
     |     | ||   |      |    |   |      |         |    | 
K-RPRF----LPELA--SA-L----G----V---S--V---D---------WL-LNGT
1jmc 1per   48  238  126  20.17
KVVPIASLTPYQSKWTICARVTNKSQIRTWSNSRGEGKLFSLELVDESGEIRATAFNEQV
         |                       ||   | |    |   | |  |   | 
---------P-----------------------RGSA-L-S----D-T-E-R--A---QL
DKFFPLIEVNKVYYFSKGTLKIANKQFTAVKNDYEMTFNNETSVMPCEDDHHLPTVQFDF
|       |       |  |   |     |            |        |        
D-------V--M----K--L-L-N-----V------------S-L------H--------
TGIDDLENKSKDSLVDIIGICKSYEDATKITVRSNNREVAKRNIYLMDTSGKVVTATLWG
      |               |     ||  ||  |    |  |            |  
------E------M--------S-R---KIS-RS--RHCI-R-VY------------L--
EDADKFDGSRQPVLAIKGARVSDFGGRSLSVLSSSTIIANPDIPEAYKLRGWFDAEGQ
    | |    |        ||   |         |                      
----K-D----P--------VS-Y-G---------T------------------S---
1jmc 1tc3   35  238   51  14.71
KVVPIASLTPYQSKW--TICARVTNKSQIRTWSNSRGEGKLFSLEL-----VD--ESGEI
       |    | |  |                  |        |     |     |  
ALTNAQILAVIDS-WEETVGQFPVITHHVPLGGGLQGTLHCYEIPLAAPYGVGFAKNGPT
R---ATAFNEQVDKF----FP-LIEVNKVYYFSKGTLKIA-NKQ-FTAVKNDYEMTFNNE
|       |  |        | | |                |           |    | 
RWQYKRTINQVVHRWGSHTVPFLLEPDNINGKTCTASHLCHNTRCHNPLHLCWESLDDNK
-TSVMPCED-D--HHLPTV-QFD-F-TG--IDDLENK-SK--DSLVD--IIGICKSYEDA
     |       |      |      |          |     |    |     | |  
GRNWCPGPNGGCVHAVVCLRQGPLYGPGATVAGPQQRGSHFVVALTNAQILAVIDSWEET
T-KITVRSNNREV--A-KRNI--Y-L-MDTS-G-KVV-TA-TLWG-E-DADK-FD--GSR
     |                 |        |        | |             || 
VGQFPVITHHVPLGGGLQGTLHCYEIPLAAPYGVGFAKNGPTRWQYKRTINQVVHRWGSH
Q-P-VL-A--IKG--ARVSDF--GGR--S-LSVL-SS-STIIA-N----PD--IPEAYK-
  |  |    | |     |      |    |     |       |    |      |   
TVPFLLEPDNINGKTCTASHLCHNTRCHNPLHLCWESLDDNKGRNWCPGPNGGCVHAVVC
LR-G-WF--DA--EG--Q-------
|| |      |   |  |       
LRQGPLYGPGATVAGPQQRGSHFVV
1jmc 1a74   50  238  324  15.43
KVVPIASLTPYQSKWTICARVTNKSQIRTWSNSRGEGKLFSLELVDESG-EIRATAFNEQ
|         |    ||           |    |        |    ||     |     
KDL-VDTTEMY-LR-TI-YELEEEG-V-T-P-LR--ARI-A-ERLEQSGPTVSQTV--AR
VDKFFPLIEVNKVYYFSKGTLKIANKQFTAVKNDYEMTFNNETSVMPCEDDHHL-PTVQF
      |  |  |   |   |     | |        |    | ||     | |      
MER-DGLV-V--V--ASDRSL-----QMTPT-G--R-TL--ATAVM--R-KHRLAERLLT
DFTGIDDLENKSKDSLVDIIGICKSYEDATKITVRSNNREVAKRNI-YLMDTSGKVVTAT
|  |  |  ||  |        |   |        |   ||  |    | | |       
DIIGL-DI-NKVHD---E--A-CR-WE---HV-M-S-D-EVERRLVKVLKDVSRSPFGNP
LWGEDADKFDGSRQPVLAIKGARVSDFGGRSLSVLSSSTIIANPDIPEAYKLRGWFDAEG
  |   |   |       |       |    |  |         |   |   |       
IPG--LDEL-GVIVQINEIFQVETDQF--TQL--LDAVELL-D-DL--AHTIR--I----
Q
 
-
1jmc 1c0w   48  238  173  20.17
KVVP-I-ASLTPYQSKWTI-CARV-TNKSQI-RTWS--N-SR-GE-GKLFSLELVDESG-
  |               |  |     |    |  |        |   |   |     | 
DLVDRLNTTFRQMEQELAIFAAHLEQHKLLVARVFSLPEVKKEDEHNPLNRIEVKQHLGN
EIRATAFNEQVDKFF-PLIE--VNKVYYFSKGTL--KIAN-KQ--FTA-VK--NDYEMTF
     |       |     |    |      | |     |  |          |    ||
DAQSLALRHFRHLFIQQQSENRSSKAAVRLPGVLCYQVDNLSQAALVSHIQHINKLKTTF
NN-ET--SVMP--CE-D-DH-HLP---TVQ-F-DFTGI-D--DLE----NKS--KDSLVD
    |  |  |        | |||   |       |   |   |     ||   |    |
EHIVTVESELPTAARFEWVHRHLPGLITLNAYRTLTVLHDPATLRFGWANKHIIKNLHRD
-IIG-ICKSYEDATKIT--VRSN-NREVAK--RNI-YL-MDTS-G-K--V-V--TATLWG
       ||           |    |        |  |        |  | |   |  | 
EVLAQLEKSLKSPRSVAPWTREEWQRKLEREYQDIAALPQNAKLKIKRPVKVQPIARVWY
E-DADKFD-GSRQPVLA-I-K--GARVSDFGGRSLSVLSSSTIIANPDIPEAYKLR---G
  |          |  | |    || | |  |  |              | |  ||    
KGDQKQVQHACPTPLIALINRDNGAGVPDV-GELLN-YDADN-VQHRYKPQAQPLRLIIP
WFDA-EGQ
        
RLHLYVAD
1jmc 1ecr   61  238  305  20.00
KVVPIASLTPYQSKWTICARVTNKSQIRTWSNSRGEGKLFSLELVDESGEIRATAFNEQV
    |       |     |    |   |   |   | |       |    |    |    
N-DDI-EV---ES--D--A---DK---RAHHNAL-ERK--R-R--D---HIK-DSFHSLR
DKFFPLIEVNKVYYFSKGTLKIANKQFTAVKNDYEMTFNNETSVMPCEDDHHLPTVQFDF
|   |     |    |     |  |   |    |          |      |  | | | 
DS-VPSLQGEKA---SR-A-QILDK---A--TEY-IQY------M--RRKNH--THQQD-
TGIDDLENKSKDSLVDIIGICKSYEDATKITVRSNNREVAKRNIY-LMDTSGKVVTATLW
  ||||     |   |          |     |   |   |     | | |   |   | 
--IDDLKRQNSDA--D--K--RAHHNA--LE-R-KRRDHIKDSFHSLRD-S---V-PSLQ
GEDADKFDGSRQPVLAIKGARVSDFGGRSLSVLSSSTIIANPDIPEAYKLRGWFDAEGQ
||   |   ||   |  | |                |     ||    | |        
GE---K--ASRAQILD-K-A--TEY-IQYMR-RKNHT--HQQDIDD-LK-R-----Q-N
1jmc 1hlo   52  238  153  21.85
KVVPIASLTPYQSKWTICARVTNKSQIRTWSNSRGEGKLFSLELVDESGEIRATAFNEQV
         ||  |   |                  || ||      |        |   
----M-E-KPY--K---C------PE------C---GKSFS-----QS------S-N---
DKFFPLIEVNKVYYFSKGTLKIANKQFTAVKNDYEMTFNNETSVMPCEDDHHLPTVQFDF
     |    |       |        |  |  |            |      |      
-----L-Q--K--H-QR-T----H---TGEK-PY------K-----C------P----E-
TGIDDLENKSKDSLVDIIGICKSYEDATKITVRSNNREVAKRNIYLMDTSGKVVTATLWG
 |      ||  |         |  |              |             | |  |
CG------KS-FS--------QS-SD---L-------Q--K---H----Q-R--THT--G
EDADKFDGSRQPVLAIKGARVSDFGGRSLSVLSSSTIIANPDIPEAYKLRGWFDAEGQ
|   |      |     |   | |  ||   |  |              |       |
E---K-P-YKCP--EC-G-K-S-F-SRS-DHL--S---------R-HQ-R----TH-Q
1jmc 1mey   40  238   84  16.81
KVVPIASLTPYQSKWTICARVTNKSQ-I-RTWSNSRGEG-K-L-F--S-L--EL-VDESG
     |      |  |    | ||         |      | |    |     | |    
TIKDVAKRANV-STTTV-SHVINKTRFVAEETRNAVWAAIKELHYSPSAVARSLKVNHTK
EIRATAFNEQVDKFFPLIE-VNKVYYFSKG-TLKI--A--N--KQ--F-T--AVKN-DYE
 |   |       |   || | |   | || ||    |  |  ||       | |  |  
SIGLLATSSEAAYFAEIIEAVEK-NCFQKGYTLILGNAWNNLEKQRAYLSMMAQKRVDGL
MTFNNE-TS-VMP-CEDDHHLP-TV-QF-----DFT-G-IDD-LE-N-KSKDSLVD----
     |         |   | |  |        |||   ||   |        |      
LVMCSEYPEPLLAMLEEYRHIPMVVMDWGEAKADFTDAVIDNAFEGGYMAGRYLIERGHR
IIGICKS-YE-D--ATKIT--VRSNNREVAK-RNIYLM--D---TSG-K----VV-----
 ||      |    |               |         |    ||             
EIGVIPGPLERNTGAGRLAGFMKAMEEAMIKVPESWIVQGDFEPESGYRAMQQILSQPHR
-TATLWGED--A-DKF---D--GSRQP--V-L-A---IKGAR-----VSDF-GGR-SLSV
 ||   | |  |       |  | | |  | |        ||              ||  
PTAVFCGGDIMAMGALCAADEMGLRVPQDVSLIGYDNVRNARYFTPALTTIHQPKDSLGE
LS-SSTI--IANP-DIP---EAY-KL---RGWFDA---EGQ
         | |    |   |    |   |   |       
TAFNMLLDRIVNKREEPQSIEVHPRLIERRSVADGPFRDYR
1jmc 1pnr   73  238  338  21.60
-K--V-------------------V---------P-------------------------
 |                                |                         
MKRYICSFADCGAAYNKNWKLQAHLSKHTGEKPFPCKEEGCEKGFTSLHHLTRHSLTHTG
------------I-----A-------------------S-----------------L---
                  |                   |                 |   
EKNFTCDSDGCDLRFTTKANMKKHFNRFHNIKMKRYICSFADCGAAYNKNWKLQAHLSKH
T-----P---------Y---------------Q---------------------------
|     |                                                     
TGEKPFPCKEEGCEKGFTSLHHLTRHSLTHTGEKNFTCDSDGCDLRFTTKANMKKHFNRF
----------S---------K-W--------------------------------T---I
          |         | |                                |    
HNIKMKRYICSFADCGAAYNKNWKLQAHLSKHTGEKPFPCKEEGCEKGFTSLHHLTRHSL
---------C-A-----R-VT--N--K--SQ---I---R---T-----------W-----
         |       |  |  |  |       |   |               |     
THTGEKNFTCDSDGCDLRFTTKANMKKHFNRFHNIKMKRYICSFADCGAAYNKNWKLQAH
-S-N------------------S-----R------GE--------G-------K--L---
 |                    |     |      ||        |       |      
LSKHTGEKPFPCKEEGCEKGFTSLHHLTRHSLTHTGEKNFTCDSDGCDLRFTTKANMKKH
---F----------S-------------LE--L---V---------D--E----------
   |          |             |   |                |          
FNRFHNIKMKRYICSFADCGAAYNKNWKLQAHLSKHTGEKPFPCKEEGCEKGFTSLHHLT
--S----GE-----------IR-AT-A--------F-N---EQ-V----D------K-F-
  |    ||            |  | |        | |           |      |   
RHSLTHTGEKNFTCDSDGCDLRFTTKANMKKHFNRFHNIKMKRYICSFADCGAAYNKNWK
-------------FP---------------L----I----E-----------V------N
             ||               |         |                  |
LQAHLSKHTGEKPFPCKEEGCEKGFTSLHHLTRHSLTHTGEKNFTCDSDGCDLRFTTKAN
--K-------V----Y----------Y-----------------------------F---
  |            |          |                             |   
MKKHFNRFHNIKMKRYICSFADCGAAYNKNWKLQAHLSKHTGEKPFPCKEEGCEKGFTSL
------S------K-------G------T---------------LK--I--------A--
      |      |       |      |                |  |        |  
HHLTRHSLTHTGEKNFTCDSDGCDLRFTTKANMKKHFNRFHNIKMKRYICSFADCGAAYN
-N-K-Q----------------------F------T--AV-----KN--------D----
 | | |                      |      |         ||        |    
KNWKLQAHLSKHTGEKPFPCKEEGCEKGFTSLHHLTRHSLTHTGEKNFTCDSDGCDLRFT
-----------Y---EM-----TF-------N-N--------------------------
                |      |       | |                          
TKANMKKHFNRFHNIKMKRYICSFADCGAAYNKNWKLQAHLSKHTGEKPFPCKEEGCEKG
----------------E---T--S----------------------V-M-----------
                |   |  |                        |           
FTSLHHLTRHSLTHTGEKNFTCDSDGCDLRFTTKANMKKHFNRFHNIKMKRYICSFADCG
----------------------P-----C-------------------E-------D--D
                      |     |                   |       |  |
AAYNKNWKLQAHLSKHTGEKPFPCKEEGCEKGFTSLHHLTRHSLTHTGEKNFTCDSDGCD
----------------H--------------------------HL---------P-----
                |                          ||         |     
LRFTTKANMKKHFNRFHNIKMKRYICSFADCGAAYNKNWKLQAHLSKHTGEKPFPCKEEG
-----------T---V----Q--F-------D--F-T------------G------I---
           |           |       |  | |                   |   
CEKGFTSLHHLTRHSLTHTGEKNFTCDSDGCDLRFTTKANMKKHFNRFHNIKMKRYICSF
-D-------D------L-------------E--NK-----------S------K----DS
 |              |             |   |           |      |    ||
ADCGAAYNKNWKLQAHLSKHTGEKPFPCKEEGCEKGFTSLHHLTRHSLTHTGEKNFTCDS
----L-----------------------V----D----------I---I----G---I--
    |                            |                   |      
DGCDLRFTTKANMKKHFNRFHNIKMKRYICSFADCGAAYNKNWKLQAHLSKHTGEKPFPC
----C-K-----------S--Y--E-----DA--------T-----K-------ITV-R-
    | |           |     |     |         |     |       |   | 
KEEGCEKGFTSLHHLTRHSLTHTGEKNFTCDSDGCDLRFTTKANMKKHFNRFHNIKMKRY
--S--------N-N----------------------------------R-------E---
  |        | |                                  |       |   
ICSFADCGAAYNKNWKLQAHLSKHTGEKPFPCKEEGCEKGFTSLHHLTRHSLTHTGEKNF
--------V-----A---K---R--NI----YL--M-D------------------T---
              |   |   |  ||    |     |                  |   
TCDSDGCDLRFTTKANMKKHFNRFHNIKMKRYICSFADCGAAYNKNWKLQAHLSKHTGEK
------SG--K----V--VT--A---------T-------L-------------------
       |  |        |            |       |                   
PFPCKEEGCEKGFTSLHHLTRHSLTHTGEKNFTCDSDGCDLRFTTKANMKKHFNRFHNIK
------------------W----------------------------------------G
                  |                                        |
MKRYICSFADCGAAYNKNWKLQAHLSKHTGEKPFPCKEEGCEKGFTSLHHLTRHSLTHTG
E-----DA---D---------------------K-----F-D-G-------------SR-
|     |    |                     |     | | |             |  
EKNFTCDSDGCDLRFTTKANMKKHFNRFHNIKMKRYICSFADCGAAYNKNWKLQAHLSKH
--Q---P------------V--L---AI-----K-------G--------A---------
      |               |          |       |        |         
TGEKPFPCKEEGCEKGFTSLHHLTRHSLTHTGEKNFTCDSDGCDLRFTTKANMKKHFNRF
------R-V-S--D-----------------------F-----G---G--------R-SL
      |   |  |                       |     |   |        | ||
HNIKMKRYICSFADCGAAYNKNWKLQAHLSKHTGEKPFPCKEEGCEKGFTSLHHLTRHSL
-----------S----------------------------V-------------------
           |                                                
THTGEKNFTCDSDGCDLRFTTKANMKKHFNRFHNIKMKRYICSFADCGAAYNKNWKLQAH
L---------------------S-------S------------S--------T-------
|                     |       |            |        |       
LSKHTGEKPFPCKEEGCEKGFTSLHHLTRHSLTHTGEKNFTCDSDGCDLRFTTKANMKKH
------I-----I--------A---N----------------P-----------------
      |     |        |   |                |                 
FNRFHNIKMKRYICSFADCGAAYNKNWKLQAHLSKHTGEKPFPCKEEGCEKGFTSLHHLT
-------------------D------------------------I---------------
                   |                        |               
RHSLTHTGEKNFTCDSDGCDLRFTTKANMKKHFNRFHNIKMKRYICSFADCGAAYNKNWK
--------------P-------------------------E-----------------A-
              |                         |                 | 
LQAHLSKHTGEKPFPCKEEGCEKGFTSLHHLTRHSLTHTGEKNFTCDSDGCDLRFTTKAN
-------Y---KL-R--------G------W-----------------------------
           |  |        |      |                             
MKKHFNRFHNIKMKRYICSFADCGAAYNKNWKLQAHLSKHTGEKPFPCKEEGCEKGFTSL
---------------F--DAEG---------------------Q
               |  |  |                      
HHLTRHSLTHTGEKNFTCDSDGCDLRFTTKANMKKHFNRFHNIK
1jmc 1tf3  173  238 2024   8.55
KVVPIASLTPYQSKWTICARVTNKSQIRTWSNSRGEGKLFSLELVDESGEIRATAFNEQV
   | |   |  |    |         |    ||    |           |  |    | 
R--PYA--CPVES----C----DR---R-F--SRSD-EL-TRH-I----RIH-T--G-Q-
DKFFPLIEVNKVYYFSKGTLKIANKQFTAVKNDYEMTFNNETSVMPCEDDHHLPTVQFDF
 |  |                  |  |     |   |    |         |  |     
-K--P-FQC-RI------CMR--N--F-S-RSDH-LT----T---------HIRT-H---
TGIDDLENKSKDSLVDIIGICKSYEDATKITVRSNNREVAKRNIYLMDTSGKVVTATLWG
||    |   |         |    |   |      |   |              |    
TG----E---K----P-FA-C----D---I---C-GR---K---F----------A----
EDADKFDGSRQPVLAIKGARVSDFGGRSLSVLSSSTIIANPDIPEAYKLRGWFDAEGQ
   |     |      |  |               |      |     ||        
R-SD--E--R------K--R------H--------T---K--I---H-LR--------
1jmc 1aay   39  238   85  16.39
K-VVPIASLTPYQSKWTI-CARVTNKS-QIRTWSNSRGEGKLFSLELVDESGEIRATAFN
   ||   |    |     |     |    |   |     | |         | | ||  
SGIVP--QLQNIVSTVNLGC-KLDLKTIALRA-RNAEYNPKRFA-AVIMRIREPRTTAL-
EQVDKFFPLIEVNKVYYFSKGTLKIANKQFTAVKNDYEMTFNNETSVMPCEDDHHLPTVQ
      |      |      |     |    |    |           |          |
--I---FS--S-GKM-VCT-GAKSEENSRL-AARK-YARVV-QKLG-FPAK-FLDF-KIQ
FDFTGIDDLENKSKDSLVDIIGICKSYEDATKITVRSNNREVAKRNIYLMDTSGKVVTAT
    |  |   |    |    |              |   |     || |      |   
-NMVGSCDV--KFPIRL-E--GLVLTHQ---QFS--SYEPELFPGLIYRM-IKPRIV-LL
LWGEDADKFDGSRQPVLAIKGARVSDFGGRSLSVLSSSTIIANPDIPEAYKLRGWFDAEG
          |    |    || |     |            |   |    | | |    
IF---V---SG-K--VV-LTGAKV-----RA-EIY-EA--FEN-IYP--I-LKG-F--R-
Q
 
K
1jmc 1cdw   44  238  179  18.49
KVVPIASLTPYQSKWTICARVTNKSQIRTWSNSRGEGKLFSLELVDESGEIRATAFNEQV
|    |  |   |    |   |       |   |      |       |           
K--R-AG-T-VCS--N-C-Q-TSTTTL--W---R---R--S-PM----G-----------
DKFFPLIEVNKVYYFSKGTLKIANKQFTAVKNDYEMTFNNETSVMPCEDDHHLPTVQFDF
|   |    |       | |             |                 |    |   
D---P-V-CN-A---C-G-L-------------Y---Y--K---L------H----Q---
TGIDDLENKSKDSLVDIIGICKSYEDATKITVRSNNREVAKRNIYLMDTSGKVVTATLWG
       |     |                |     |   |      |  |     |   
--V----N--R-PL----------------TM----R---K------D--G--I-QT---
EDADKFDGSRQPVLAIKGARVSDFGGRSLSVLSSSTIIANPDIPEAYKLRGWFDAEGQ
         |      |             |  ||                       
----R---NR------K-------------V--SS-----------------------
1jmc 1gat   31  238   60  13.03
KVVPIASLTPYQSKWTICARVTNKSQIRTWSNSRGEGKLFSLELVDESGEIRATAFNEQV
                   ||  |   |   |       |    |  |   |        
------------D------RV--K---RP-MNA------F---IV-WS---R--------
DKFFPLIEVNKVYYFSKGTLKIANKQFTAVKNDYEMTFNNETSVMPCEDDHHLPTVQFDF
|                   |       |  |   |   |  |    |            
D------Q--R-----R---KM------ALENP-RM--RN--S----E------------
TGIDDLENKSKDSLVDIIGICKSYEDATKITVRSNNREVAKRNIYLMDTSGKVVTATLWG
  |      ||  |    |    |    |        | |           |      | 
--I------SK-QL----G----YQ--WKM-L-T---E-A-------E---K------W-
EDADKFDGSRQPVLAIKGARVSDFGGRSLSVLSSSTIIANPDIPEAYKLRGWFDAEGQ
     |    |  |    |       |             |     ||          
-PF--FQ-EAQK-L--Q-A-M--H--R------EK--Y--PN----YK----Y----R
1jmc 1hry   36  238   73  15.13
KVVPIASLTPYQSKWTICARVTNKSQIRTWSNSRGEGKLFSLELVDESGEIRATAFNEQV
   ||        |     |         |    ||          |  |         |
---PI--V-----K-----RL-----L-GW--KKGE-Q--N-G--QE--E-K-WC-EKAV
DKFFPLIEVNKVYYFSKGTLKIANKQFTAVKNDYEMTFNNETSVMPCEDDHHLPTVQFDF
 |   |  | |     |  ||   |  |    | |     |             | |   
-K--SL--V-K-----K--LK---K--TG-QLD-EL----EKAI----------TTQ-N-
TGIDDLENKSKDSLVDIIGICKSYEDATKITVRSNNREVAKRNIYLMDTSGKVVTATLWG
       |  |     |  |  |  |     | |  |   |    |      |    || 
--V----N-TK---C-IT-IPRSL-DG-RLQV-S-HR---K-G--L---P-HVIYCRLW-
EDADKFDGSRQPVLAIKGARVSDFGGRSLSVLSSSTIIANPDIPEAYKLRGWFDAEGQ
   |    |    |         |               ||     |  |     |  
RWPD-LH-SHHE-L--RAMELCEF---AFN-MKKDEVCVNP-Y-H-YQ-R----VE-T
1jmc 1mhd   47  238  123  19.75
KVVPIASLTPYQSKWTICARVTNKSQIRTWSNSRGEGKLFSLELVDESGEIRATAFNEQV
|   |  |  ||               |    | |          | |  |        |
K---I-RL--YQ--F-L---L-D--LLR----S-GD-----MK--D-S--I----W--WV
DKFFPLIEVNKVYYFSKGTLKIANKQFTAVKNDYEMTFNNETSVMPCEDDHHLPTVQFDF
||              |||      ||   |         |          |        
DK-----D--------KGT--F---QFSS-K--HK-----E-A-L-A----H----R--W
TGIDDLENKSKDSLVDIIGICKSYEDATKITVRSNNREVAKRNIYLMDTSGKVVTATLWG
 ||    |  |            ||   |       |  | || |     ||    |  |
-GIQK-GNR-K-KM--------TYE---K--M-A--R--ALRN-Y-----GK----T--G
EDADKFDGSRQPVLAIKGARVSDFGGRSLSVLSSSTIIANPDIPEAYKLRGWFDAEGQ
|   |       |   |              |   |          |     |  |  
E-V-K----K--V---K--K------K----L---T----------Y--Q--FSGEVL
1jmc 1pue   47  238   89  19.75
KVVPIASLTPYQSKWTICARVTNKSQIRTWSNSRGEGKLFSLELVDESGEIRATAFNEQV
     |        |    |           |      |  | |     | |  |    |
SPYSAAMAEERHQEW-L--RFVDLLK-NAYQNDL-HLPLLNLMLTPD--E-R-EALGTRV
DKFFPLIEVNKVYYFSKGTLKIANKQFTAVKNDYEMTFNNETSVMPCEDDHHLPTVQFDF
       |       |   ||  |               |     | |    |  |    
-R-I-VEELLR-GEMSQRELK--NELGAGIAT-ITRG-SNSLKAAPVELRQWLEEV-L-L
TGIDDL-ENKSKDSLVDIIGICK-SYEDATKITVRSNNREVA-KRNIYLMDTSGKVVTAT
   |   |      |       |  |          |       |   |  |    |   
KS-DAMAEERHQEWL-RFVDLLKNAYQNDLHLPL-LNLMLTPDEREA-L-GTRVRIVEEL
LWGEDADKFDGSRQPVLAIKGARVSDFGGRSLSVLSSSTIIANPDIPEAYKLRGWF-DA-
| ||            |   ||       |     | |   | |   |   || |     
LRGEMSQR-E-LKNE-L---GAGIATI-TR--G--SNS-LKAAP-V-E---LRQWLEEVL
-EGQ
    
LKSD
1jmc 1tro   46  238  203  19.33
KVVPIASLTPYQSKWTICARVTNKSQIRTWSNSRGEGKLFSLELVDESGEIRATAFNEQV
  |          |      |  |          || |    | ||       |      
-MV----------K------V--K--FK-Y---KGEEK----E-VD-------T--S---
DKFFPLIEVNKVYYFSKGTLKIANKQFTAVKNDYEMTFNNETSVMPCEDDHHLPTVQFDF
 |    |   ||                  |    |       |               |
-K----IK--KV-W------RV------G-K----M-------V----------S----F
TGIDDLENKSKDSLVDIIGICKSYEDATKITVRSNNREVAKRNIYLMDTSGKVVTATLWG
|  ||  |          |         | |          |        |    |    
T-YDD--N----------G---------K-T--------G-R--------G----A-V-S
EDADKFDGSRQPVLAIKGARVSDFGGRSLSVLSSSTIIANPDIPEAYKLRGWFDAEGQ
|   | |    |    |           |  |      |      |   |     |  
E---K-D-A--P----K-----E-----L--L--D-MLA-----RA-E-R-----EKK
1jmc 1azq   40  238   66  16.81
KVVPIASLTPYQSKWTICARVTNKSQIRTWSNSRGEGKLFSLELVDESGEIRATAFNEQV
      |      |       | |            | |  | |        |     | 
------S-R-HE-K-SL-GLLTTKF-VSLLQEAK-DGVL-DLKLAADT--L-A-V--RQK
DKFFPLIEVNKVYYFSKGTLKIANKQFTAVKNDYEMTFNNETSVMPCEDDHHLPTVQFDF
      |  | |     |      |     ||                   |       |
RRIYD-I-TN-V--L-EG-IGLIEKK--S-KNSIQ--WKGK-G-L-----RH-------F
TGIDDLENKSKDSLVDIIGICKSYEDATKITVRSNNREVAKRNIYLMDTSGKVVTATLWG
          |   |     |       | |  | | |||                 |  
S----M----K---V-----CEKVQ--RKGTT-SYN-EVAD-EL-VSEFTNS--NNHL-A
EDADKFDGSRQPVLAIKGARVSDFGGRSLSVLSSSTIIANPDIPEAYKLRGWFDAEGQ
 |    |   |    |   || |     | ||    ||      |      |      
ADS-AYD---QK--NIR-RRVYD----ALNVLMAMNIISK----EKKEIK-WIGL--P
1jmc 1cf7   44  238  149  18.49
KVVPIASLTPYQSKWTICARVTNKSQIRTWSNSRGEGKLFSLELVDESGEIRATAFNEQV
           |       |    |  ||   |       |  | ||  | |  || |  
-----------Q-------R---RS--RT-TFS---A---S-QL-DEL-E-R--AF-ERT
DKFFPLIEVNKVYYFSKGTLKIANKQFTAVKNDYEMTFNNETSVMPCEDDHHLPTVQFDF
    |        |             |            |      |    |   |   
-Q-YP--D---I-Y-------------T--R---------E------E----L--AQ-R-
TGIDDLENKSKDSLVDIIGICKSYEDATKITVRSNNREVAKRNIYLMDTSGKVVTATLWG
|      |     |                |      | | | |         |    | 
T------N-----L----------------T------E-A-R-I-------Q-V----W-
EDADKFDGSRQPVLAIKGARVSDFGGRSLSVLSSSTIIANPDIPEAYKLRGWFDAEGQ
     |   |        ||      |        |                      
-----FQ-NR------R-ARL-----R-----KQHT---S--V-----------S---
1jmc 1fjl   38  238   64  15.97
KVVPIASLTPYQSKWTICARV-TNKSQ-IRTW-SN-SR-GE---GKLFSLELV-D-ESGE
   |  | |        |        |   |         |         ||  | |   
R-IPL-SCTICRKRKVKCDKLRPHCQQCTKTGVAHLCHYMEQTWAEEAEKELLKDNELKK
IRATAFN-EQ-VDK--FFPL---I----EV--NKV--Y--YFSK-GTLKIAN-KQFT-AV
 |      |    |    ||   |     |   |         | |          | | 
LRERVKSLEKTLRKRNRIPLSCTICRKRKVKCDKLRPHCQQCTKTGVAHLCHYMEQTWAE
KNDYEMTFNNE----TS-VMPCEDDHHLP---TV-QFDFTGIDDLENKSKD-SLVDIIGI
    |    ||       |   |     |   |         | |               
EAEKELLKDNELKKLRERVKSLEKTLRIPLSCTICRKRKVKCDKLRPHCQQCTKTGVAHL
C----KSY-EDATKITVRSNN-REVAKRNIYLMDT-S-GKV-VTATLWGEDADKFDGSRQ
|        | | |     |       |   |  |          |       | |  | 
CHYMEQTWAEEAEKELLKDNELKKLRERVKSLEKTLKRNRIPLSCTICRKRKVKCDKLRP
PV-LAIK-G-ARVSDFGGRSLSVLSSSTIIANPDIPEAYKLRGWFDA-EGQ-
      | | |                      |  |  |||      |   
HCQQCTKTGVAHLCHYMEQTWAEEAEKELL-K-D-NELKKLRERVKSLEKTL
1jmc 1hwt   53  238  287  18.47
-K---VVPIASL-TPYQSKWTICAR---VTNKS-QIRTWSNSR------GE-GKL--FS-
 |      |           |   |      |                  | |    || 
QKERRKIEIKFIENKTRRHVTFSKRKHGIMKKAFELSVLTGTQVLLLVVSETGLVYTFST
--LE-LV-DESG-E-IRATAFNEQVD--KF-FPLIEVNKV--YY-FSKGTLKIANKQF-T
   |  |    |   | |   |   |  |     || ||      |||    |  | |  
PKFEPIVTQQEGRNLIQA-CLNAPDDRRKIEIKFIE-NKTRRHVTFSKRKHGIMKKAFEL
AVKNDYE-MTF-NNETS-VMPCEDDHHLPTV-QFDFTG-IDDLENKSKDSLV-DII--G-
 |            ||  |         | | |      |    |   | ||        
SVLTGTQVLLLVVSETGLVYTFSTPKFEPIVTQQEGRNLIQACLN-APDGLVFNVVTQDM
ICKS---YE-DA-TKITVRSNNREVAK--RNIYLMDTSG-K-VV--TA-T---L--W--G
| ||   |     ||  ||      ||   | || || |       |         |   
INKSTKPYRGHRFTKENVRILESWFAKNIENPYL-DTKGLENLMKNTSLSRIQIKNWVSN
-EDADK----FDGSRQPVL--AIKGARVSDFGGRSLSVLSS--STIIANP--DIP--E-A
     |    |    |       |  |   |       | |     | ||  |    |  
RRRKEKTGLVFNVVTQDMINKSTKPYRGHRFTKENVRILESWFAKNIENPYLDTKGLENL
YK---L-R----GWF-D---AEGQ
 |   | |     |       |  
MKNTSLSRIQIKNWVSNRRRKEKT
1jmc 1mnm   75  238  320  23.44
KVVPIASLTPYQSKWT-ICA-R-VTNKSQIRTWSNSRGEGKLFSLELVDESGEIRATAFN
   |   |      |  |        |  |       | |||    |            |
S-HP--DLNKLLELWPHIQEYQDLALKHGINDIFQDNG-GKLLQVLLITGLTVLPGREGN
EQVDKFFPLIEVNKVYY-FSKG--TLKIANKQFTAVKNDYEMTFNNETSVMPCEDDHHL-
  ||      |         ||  |    |    |        |         |    | 
DAVDNAGQEYELKSINIDLTKGFSTHHHMNPVIIAKYRQVPWIFAIYRGI-AIEAIYRLE
P-TVQF--D------FT-GIDDLEN-KSKDSLVDIIGI-CKSYEDATK-ITV--R-SNNR
|    |  |         |  |  | |     |   |    |  |  |            
PKDLEFYYDKWERKWYSDGHKDINNPKIPVKYVMEHGTKIYSHPDLNKLLELWPHIQEYQ
EVA-KRNIY-L-MDTSGK---V--VTA-T-LWG-EDADKFD--GSR-Q--PV-LAI-KG-
  | |  |     |  ||   |   |  | | | |  |  |  |             || 
DLALKHGINDIFQDNGGKLLQVLLITGLTVLPGREGNDAVDNAGQEYELKSINIDLTKGF
A---RVSD--FGG-RSLS-VLS-SSTI-I-A----NP-DIPEAY-KL-RGWF-----D--
              |           | | |     | |    | |  | |      |  
STHHHMNPVIIAKYRQVPWIFAIYRGIAIEAIYRLEPKDLEFYYDKWERKWYSDGHKDIN
--------A-E-G-Q--
          | |    
NPKIPVKYVMEHGTKIY
1jmc 1pvi   65  238  312  20.83
KVVPIASLTPYQSKWTICARVTNKSQIRTWSNSRGEGKLFSLELVDESGEIRATAFNEQV
  ||    | ||       |            | |  |  |      |       |  | 
S-VP-SQKT-YQGSYGF--RL-G-F-L----HS-GTAK--SVTCT-YSPALN-KMFC-QL
DKFFPL-IEVNKVYYFSKGTLKIANKQFTAVKNDYEMTFNNETSVMPCEDDHHLPTVQFD
 |  |    |        ||           |    ||   |  |  |   ||      |
AKTCPVQLWVDST-P-PPGT-RV--RAMAIYKQSQHMT---EV-VRRC--PHH-ERCS-D
FTGIDDLENKSKDSLVDIIGICK-SYEDATKITVRSNNREVAKRNIYLMDTSGKVVTATL
    | |       |    |     | |    | |     |     |     |   | | 
-S--DGLA-PPQ-HLIRVEGNLRVEYLD-DRNTFR-HS-VVVP---YEPPEVGSDCT-TI
-WG-E-DADKFDG-SRQPVLAIKGARVSDFGGRSLSVLSSSTIIANPDIPEAYKLRGWFD
            |  | | | |      |  |  |    |         |     |    
HYNYMCNSSCMGGMNRRPILTI--ITLEDSSGNLLG-RNSFEVRVCA-CP-G-RDRR-TE
AEGQ
 |  
EENL
1jmc 1tsr   52  238  194  21.85
KVVPIASLTPY-QS--KW-TIC-A-R-VTNKSQI-R-----TW-SN--SRGEGK--LFSL
|            |  |   |    |     |   |     ||       |  |  |  |
KGGWFGKHRGQGGSNPKFENIAEGLRALLARSHVERTTDEGTWVAGVFVYGGSKTSLYNL
EL-VDES-GEIRAT--A---FN-EQ-V-DKFFPLIEVNKVYYFSKG-TLKI-ANKQFTAV
           | |      |           || |   | ||       | |     | 
RRGTALAIPQCRLTPLSRLPFGMAPGPGPQPGPLRE-SIVCYFMVFLQTHIFAEVLKDAI
KNDYEMTFNNET-SV-MP-CE-DDH-HLPT-VQF-DFTGIDDLENKSKDSLVD-IIG-IC
| |  ||    |       |  ||   ||    |    |     |               
K-DLVMTKPAPTCNIRVTVCSFDDGVDLPKGGWFGKHRG-QGGSNPKFENIAEGLRALLA
KSY-EDAT-KIT-VRS-NNREVAKRNIY-L-MDTS-G--KV-VT--ATL-WG-EDA-DKF
 |  |  |   | |         |   | |   |         |    |  |        
RSHVERTTDEGTWVAGVFVYGGSKTSLYNLRRGTALAIPQCRLTPLSRLPFGMAPGPGPQ
DGS-RQPVLAIKGARV-SDFGGRSLSVLSSSTIIANPDIPEA-YKLRGW-FDAEG-Q--
 |  |                   |           |  |          ||  |    
PGPLRESIVCYFMVFLQTHIFAEVLKDAIKDLVMTKP-APTCNIRVTVCSFD-DGVDLP
1jmc 1b3t   58  238  294  19.73
-K---------------------------V-------V----------P--I----A---
 |                           |       |          |       |   
MKPVTLYDVAEYAGVSYQTVSRVVNQASHVSAKTREKVEAAMAELNYIPNRVAQQLAGKQ
SL-TP-------------Y--------Q----S-----K---------W-----------
||  |             |        |    |     |                     
SLMKPVTLYDVAEYAGVSYQTVSRVVNQASHVSAKTREKVEAAMAELNYIPNRVAQQLAG
--------T---IC--A--------R-------V---T---------------N------
        |       |        |       |   |               |      
KQSLMKPVTLYDVAEYAGVSYQTVSRVVNQASHVSAKTREKVEAAMAELNYIPNRVAQQL
-------K-------------S-Q-I-R-----------T-------WS--N---SR---
       |             | |   |           |           |    |   
AGKQSLMKPVTLYDVAEYAGVSYQTVSRVVNQASHVSAKTREKVEAAMAELNYIPNRVAQ
---G--------------E--G----------------------K-------L-F-----
   |              |  |                      |       |       
QLAGKQSLMKPVTLYDVAEYAGVSYQTVSRVVNQASHVSAKTREKVEAAMAELNYIPNRV
S--L---E-L---V---D--E-SG---E-I-R---------A-T--------A---F--N
   |     |   |   |  |  |       |         | |        |      |
AQQLAGKQSLMKPVTLYDVAEYAGVSYQTVSRVVNQASHVSAKTREKVEAAMAELNYIPN
----E----Q-----V---D--KF----F---P--L-----I-----E-V----------
         |     |   |                           | |          
RVAQQLAGKQSLMKPVTLYDVAEYAGVSYQTVSRVVNQASHVSAKTREKVEAAMAELNYI
-N-------------K-V--Y----Y----F---SK---------G-TL-KI----A---
 |             | |  |    |        |            |  |     |   
PNRVAQQLAGKQSLMKPVTLYDVAEYAGVSYQTVSRVVNQASHVSAKTREKVEAAMAELN
---N--------KQ------------------F-T-------A--V------K-------
   |        ||                    |       |  |      |       
YIPNRVAQQLAGKQSLMKPVTLYDVAEYAGVSYQTVSRVVNQASHVSAKTREKVEAAMAE
-----N-------------------D--------Y---------------------E--M
     |                   |        |                     |  |
LNYIPNRVAQQLAGKQSLMKPVTLYDVAEYAGVSYQTVSRVVNQASHVSAKTREKVEAAM
T-FN---N----E-T---SVM-PCE--D--D-----H-----------H-----------
   |   |          | | |    |                    |           
AELNYIPNRVAQQLAGKQSLMKPVTLYDVAEYAGVSYQTVSRVVNQASHVSAKTREKVEA
----L---PT-V-------Q--------FD---FTG---------------I-----D--
    |   |  |       |         |     |                        
AMAELNYIPNRVAQQLAGKQSLMKPVTLYDVAEYAGVSYQTVSRVVNQASHVSAKTREKV
D--L-E-----N--------K-S--K-----D-------------------S-L------
     |     |        | |  |     |                   |        
EAAMAELNYIPNRVAQQLAGKQSLMKPVTLYDVAEYAGVSYQTVSRVVNQASHVSAKTRE
-V-----D---I---I-----G---ICK--S-YE--D-A-----T--K-I---T-V----
 |         |         |     |    |     |     |          |    
KVEAAMAELNYIPNRVAQQLAGKQSLMKPVTLYDVAEYAGVSYQTVSRVVNQASHVSAKT
R-------S--N---NR---------------------E------------------V-A
|          |   ||                     |                  | |
REKVEAAMAELNYIPNRVAQQLAGKQSLMKPVTLYDVAEYAGVSYQTVSRVVNQASHVSA
K-R-NI--------Y--------------LM------D----------T-----------
| |           |              ||      |          |           
KTREKVEAAMAELNYIPNRVAQQLAGKQSLMKPVTLYDVAEYAGVSYQTVSRVVNQASHV
SG----KV-------------VT---A---------TL-----W-G--------------
|     ||             |    |         ||       |              
SAKTREKVEAAMAELNYIPNRVAQQLAGKQSLMKPVTLYDVAEYAGVSYQTVSRVVNQAS
-------E--D---AD-------------------K----FD-----G------SR---Q
       |      |                    |     |     |      ||   |
HVSAKTREKVEAAMAELNYIPNRVAQQLAGKQSLMKPVTLYDVAEYAGVSYQTVSRVVNQ
----------------------P--V---LA----I-K-----------G----------
                      |  |   ||      |           |          
ASHVSAKTREKVEAAMAELNYIPNRVAQQLAGKQSLMKPVTLYDVAEYAGVSYQTVSRVV
-------A--R--V----SD--F---------GGR-SL-S-V-L--------------S-
       |  |  |                   |  ||   | |              | 
NQASHVSAKTREKVEAAMAELNYIPNRVAQQLAGKQSLMKPVTLYDVAEYAGVSYQTVSR
-----S--S--T---I---IA--N--PD-I------------P-------E-A---Y---
     |  |  |        |  |  |               |       | |   |   
VVNQASHVSAKTREKVEAAMAELNYIPNRVAQQLAGKQSLMKPVTLYDVAEYAGVSYQTV
----------------K-------L-----R------G----W-----FD----------
                |       |     |      |           |          
SRVVNQASHVSAKTREKVEAAMAELNYIPNRVAQQLAGKQSLMKPVTLYDVAEYAGVSYQ
------------------------AE-------------G-Q--
                        ||             | |  
TVSRVVNQASHVSAKTREKVEAAMAELNYIPNRVAQQLAGKQSL
1jmc 1cjg  159  238 1364  11.66
KVVPIASLTPYQSKWTICARVTNKSQIRTWSNSRGEGKLFSLELVDESGEIRATAFNEQV
|         |        |     | | |      || |         |||        
K-----H---YRG---V--R-----Q-RPW------GK-FA------A-EIR--------
DKFFPLIEVNKVYYFSKGTLKIANKQFTAVKNDYEMTFNNETSVMPCEDDHHLPTVQFDF
|   |     |      |    |      |                      | |  |  
D---P---A-K----N-G----A-R----V---W------------------LGT--FE-
TGIDDLENKSKDSLVDIIGICKSYEDATKITVRSNNREVAKRNIYLMDTSGKVVTATLWG
|                       |||            |    |  |       |    
T---------------------A-EDA------A----LA----Y--D---R---A----
EDADKFDGSRQPVLAIKGARVSDFGGRSLSVLSSSTIIANPDIPEAYKLRGWFDAEGQ
  |  |   |       |   |    | |  |       |   |    ||        
--A--F---R---M--RG---S----RAL--L-------N--FP----LR----V---
1jmc 1gcc   41  238   63  17.23
KVVPIASLTPYQSKWTICARV-TNKSQ-I-R-TWSNSRGEGKLFSLELVDESGEIRATAF
   |        |   |      ||   |    |      |        |     |  | 
RMRPWLEM-QINSN-QIPGLIWINKEEMIFQIPWKHAAKHG--WDIN-KD-ACLFRSWAI
NEQVDKFFPLIEVNKVYYFSKGTLKIANKQFTAVKNDYEMTFNNETSVMPCEDDHHLPTV
           |  |     | | | ||  |    |        |  |           |
H--TGR-YKAGE--K-EPDPK-TWK-AN--FRCAMN--SLP-DIE-EVKDQSRNKGSSAV
QFDFTGIDD-LENK-SKDSLVDIIGICKSYEDATKITVRSNNREVAKRNIYLMDTSGKVV
          ||           | | |  |    |         ||      |      
RV-YRMMRPWLEMQINSNQIPGLIWINK--EE--MI-FQIPWKHAAKHG-W--DINKDAC
TATLWGEDADKFD-GSRQPVLAIKGARVSDFGGRSLSVLSSSTIIANPDIPEAYKLRGWF
    |         |   |    |      |  |     |   |    |     |     
LFRSWAIHTGRYKAGEKEPD-P-KTWK-ANF--R-CAMNSLPDIEEVKD-QSRNKGSSAV
DAEGQ
     
RVYRM
1jmc 1if1   43  238  209  18.07
KVVPIASLTPYQSKWTICARVTNKSQIRTWSNSRGEGKLFSLELVDESGEIRATAFNEQV
    |    |    |      | |         |         ||   |  |       |
-ML-IKG--P----W------T-K-E----EDQR----V--IKLVQKYGPKR---WS--V
DKFFPLIEVNKVYYFSKGTLKIANKQFTAVKNDYEMTFNNETSVMPCEDDHHLPTVQFDF
      |   |     ||   |  ||        |    |     | |      |     
------I-A-K--HL-KG--RI-GKQ--C-R---E-RWHNHLN--P-E--VK-KT---SW
TGIDDLENKSKDSLVDIIGICKSYEDATKITVRSNNREVAKRNIYLMDTSGKVVTATLWG
|     |    |     | |   |  |             ||   |    |       | 
T--EE-E----DR----I-I---YQ-A--------H----KR---L----G---N-R-WA
EDADKFDGSRQPVLAIKGARVSDFGGRSLSVLSSSTIIANPDIPEAYKLRGWFDAEGQ
| | |        |   | |  |                |         |        
EIA-K--------L-LPG-R-TD----N-AI-KNHW---N-----S-TMR----RK-V
1jmc 1mse   44  238  105  18.49
KVVPIASLTPYQSKWTICARVTNKSQIRTWSNSRGEGKLFSLELVDESGEIRATAFNEQV
      | |    |   | |   |  |        |    |        |          
------SRT--ACK-R-C-RL--K-KIK--CD-Q-E--FPSCKRCAKL-EVPCVSLDPAT
DKFFPLIEVNKVYYFSKGTLKIANKQFTAVKNDYEMTFNNETSVMPCEDDHHLPTVQFDF
 |  |      |  |       |       |  |       |           |      
GKDVP--R-SYV-FFLE-D-RLA-VMMRVLK-EYGV---DPTKI---R-G-NIP-A----
TGIDDLENKSKDSLVDIIGICKSYEDATKITVRSNNREVAKRNIYLMDTSGKVVTATLWG
|  || |    | |      ||      ||          ||   |       |   |  
TS-DD-E-PF-D-LKSRTA-CKRCR-LKKIKC-DQEFPSCKRCAKL-EV--PCV--SL-D
EDADKFDGSRQPVLAIKGARVSDFGGRSLSVLSSSTIIANPDIPEAYKLRGWFDAEGQ
    | |  |  |         |   | | |             | |   |  |    
PATGK-DVPRSYVF-F----LED---R-LAVM--MRVL-K----E-Y---G-VD-P-T
1jmc 1pyi   46  238  158  19.33
KVVPIASLTPYQSKWTICARVTNKSQIRTWSNSRGEGKLFSLELVDESGEIRATAFNEQV
    ||   |   |   |   | |   |   ||    |   |      |  |     |  
--T-IA--CPH--K-G-C---T-K-MFR--DNS-AMRK--HLH-T-H-GP-RVHVCAE-C
DKFFPLIEVNKVYYFSKGTLKIANKQFTAVKNDYEMTFNNETSVMPCEDDHHLPTVQFDF
 | |   |       ||  ||    |   |      |   |    |        |  |  
GKAF--VE-S-----SK--LK-RH-QL--V---H--T--GE-K--PFQ----C-T--FE-
TGIDDLENKSKDSLVDIIGICKSYEDATKITVRSNNREVAKRNIYLMDTSGKVVTATLWG
 |      |   || |                |     |  | |            |  |
-G---C-GK-RFSL-D-------F-N---L--RT-H--V--R-IH-----------T--G
EDADKFDGSRQPVLAIKGARVSDFGGRSLSVLSSSTIIANPDIPEAYKLRGWFDAEGQ
      |  | |        |  | |        ||   |        |     |   
------D--R-P---Y----VCPFDGCN-KKFAQST---N--L-KSHILT---HA---
1jmc 1ubd   51  238  114  21.43
KVVPIASLTPYQSKWTICARVTNKSQIRTWSNSRGEGKLFSLELVDESGEIRATAFNEQV
   |   |    |   |      ||   |     || |   |      |   |       
---P--TLEWFLSHCHI-HKYPSKS---TLIH-QGE-KAETLYYI-VKGSV-AVLIKDEE
DKFFPLIEVNKVYYFSKGTLKIANKQFTAVKNDYEMTFNNETSVMPCEDDHHLPTVQFDF
 |    |      |   |   |            |           ||           |
GK--EMI-LS---YLNQGDF-I-G-ELGLFEEGQERSAWVRAKT-ACE-VAEI-SYK-KF
TGIDDLENKSKDSLVDIIGICKSYEDATKITVRSNNREVAKRNIYLMDTSGKVVTATLWG
       |   |          |   |    | |    |   |    |  |     ||  
RQLIQV-N--PD--I-LMRL--SAQMARRLQVTS-EK-VG--NLAFLDVTGR-IAQTLLN
EDADKFDGSRQP-VLAIKGARVSDFGGRSLSVLSSSTI--IANP-DIPEAYKLRG-WFDA
  |   |    |    ||  |     |      |  |   |             |     
L-AKQPDAMTHPDGMQIKITR-QEI-GQIVG-CSRETVGRILKMLEDQNLISAHGKTIVV
EGQ
 | 
YG-
1jmc 1ber   46  238  199  19.33
KVVPIASLTPYQSKWTICARVTNKSQIRTWSNSRGEGKLFSLELVDESGEIRATAFNEQV
         ||         |  |  | |   |    |     | ||             
AEWSGEYISPYAEHGKKSEQV--K-KI-T-V-SI-PLKVLKI-LTDERTRRQVNNLRHAT
DKFFPLIEVNKVYYFSKGTLKIANKQFTAVKNDYEMTFNNETSVMPCEDDHHLPTVQFDF
     | |      |    |            | |         |  |     |      
NSEL-LCEA-FLHAFTGQPLP-DDADLRKERSD-EIP-EAAKEIMR-EMGIN-PET-WEY
TGIDDLENKSKDSLVDIIGICKSYEDATKITVRSNNREVAKRNIYLMD-TSGKVVTATLW
      |  |        |  || |   |||| |    | |  | | |      |   | 
AEWSG-EYIS--PYAE-HG-KKS-EQVKKITV-SIPLKVLK--I-LTDERTRRQVN-NL-
GEDADKFDGSRQPVLAIKGARVSDFGGRSLSVLSSSTIIANPDIPEAYK--LRGW-FDAE
   |     |    |    |    | |  |             |||| |   |      |
-RHA-T-N-S-E-LLC-E-AFLHAFTGQPLPDDADLRKERSDEIPEAAKEIMREMGINPE
-GQ-
    
TWEY
1jmc 1cma   52  238  208  21.85
-KVVPIASL-TPYQS-KWTICA-RVTN-K-SQI---R-TWSNS-R-GEGKL-FSL-E---
      |   |  ||      |      |   |       | | | |   |     |   
MRLFGYARVSTSQQSLDIQVRALKDAGVKANRIFTDKASGSSSDRKGLDLLRMKVEEGDV
-LV---DESG----E-IR-ATAFNEQ-VD-KFF-P-L-I--EVNKVYYFSKGTLKIANKQ
 ||   |  |      |     |  | |   |         |  |           |  |
ILVKKLDRLGRDTADMIQLIKEFDAQGVSIRFIDDGISTDGEMGKMVVTILSAVAQAERQ
FTAVK-ND--YE-M----TF---NN-E-TSVMPC-ED--D-HHL-PT--V-QFD-FTGI-
      |    | |     |          |           |   |           | 
RILERTNEGRQEAMAKGVVFGRKRKIDRDAVLNMWQQGLGASHISKTMNIARSTVYKVIN
D-D--L----E-NKSKDSL-VDI--I---GI-C-KSYED-AT-KITVRSN-N--R-EVAK
     |        |  ||          |        | |      |      |  |  
ESNMRLFGYARVSTSQQSLDIQVRALKDAGVKANRIFTDKASGSSSDRKGLDLLRMKVEE
RNIYL---MDTSGK-VV-TATLWGE-DA---D-KF--DG-S------RQ--PVL-AIKGA
    |    |  |        |  | ||      |  || |            | |   |
GDVILVKKLDRLGRDTADMIQLIKEFDAQGVSIRFIDDGISTDGEMGKMVVTILSAVAQA
---RVSD-FG-GR--SLS--VL-S-SSTI----IAN--PD-IPEAY--K---L-RGW-FD
   |       ||       |       |      |            |     |     
ERQRILERTNEGRQEAMAKGVVFGRKRKIDRDAVLNMWQQGLGASHISKTMNIARSTVYK
A--EGQ
   |  
VINESN
1jmc 1gdt   67  238  366  18.31
KVVPIASLTPYQSKWTICARVTNKSQIRTWSNSRGEGKLFSLELVDESG-EIRATAFNEQ
|    || |       |   |  |   |            |       |  ||   |   
K----ASFTDEEDEF-I-LDVVRKNPTRRTTHTLYD-EI-SHYVPNHTGNSIR-HRFRVY
VDKFFPLIEVNKVYYFSKGTLKIANKQFTAVKNDYEMTFNNETSVMPCEDDHHLPTVQFD
  |   | |   | |      |   |    |  |        | | |            |
LSK--RL-EY--V-Y--E-VDKF-GK-L--VRDD-DGNL-IKTKVLPPSIKRKF-SADED
FTGIDDLENKSKDSLVDIIGICKSYEDATKITVRSNNREVAKRNIYLMDTSGKVV-TATL
 |       | |    |   |         |   |     | |             |   
YT-L-AIAVK-KQFYRDLFQIDPD-TGRSLIRTQSRRGPIA-REFFKHFAEEHAAHTENA
WGEDADKFDGSRQPVLAIKGARVSDFGGRSLSVLSSSTIIANPDIPEAYKLRGWFDAEGQ
|    | |   |   ||  |    |      |         |   |      |       
W-R--DRF---RKFLLAY-G--IDDY----ISYYEAEEPMKNL-TP-T-P--GNYNS---


1jmc 1ign   48  238  189  20.17
KVVPIASLTPYQSKWTICARVTNKSQIRTWSNSRGEGKLFSLELVDESGEIRATAFNEQV
       |   |      |  | | | |     |   ||         |     |     
---DLEEL-E-Q--F---AK-TFK-Q-R-----R-I-KL-G--FT-Q-GDV-GLA----M
DKFFPLIEVNKVYYFSKGTLKIANKQFTAVKNDYEMTFNNETSVMPCEDDHHLPTVQFDF
 |   |   |    ||  |  |    | |  |     | |    | |      |      
GK---LYG-ND---FSQ-T-TI-SR-FEAL-N---LSFKN----M-CK--LK-PLLE-KW
TGIDDLENKSKDSLVDIIGICKSYEDATKITVRSNNREVAKRNIYLMDTSGKVVTATLWG
    | | |   |      |    |  | | |          |     ||    |     
--LNDAERKKRTS------I----E--TNIRV-ALEKSFLE-N-Q-KPTS-EEIT-MI--
EDADKFDGSRQPVLAIKGARVSDFGGRSLSVLSSSTIIANPDIPEAYKLRGWFDAEGQ
  ||        |  |   ||  |  |          | |   |              
--ADQLNMEKE-V--I---RVW-FCNRR-Q--KEKR-I-N---P--------------
1jmc 1oct   51  238  131  21.43
--KVVPIASLTPYQSKWTICARVTNKSQIRTWSNS-R-G-EGKLFSLELVDESGEIRATA
    |    ||          |   |          |    |       |    ||    
SPRIVQSNDLT--EAAYSL-SR-DQKRMLYLFVDQIRKSHDG-ICEIH-VAKYAEIFGLT
FNEQVDKFFPLIEVNKVYYFSKGTLKIANKQFT-AVKNDYEMTFN-NETSVMPCEDDHHL
      |        |   |  |        |    |               |       
-SAEASK--DIRQALK--SFA-GKEVVFYESFPWFIKPAHSPSRGLYSVHINPYLIPFFI
PTVQFDFTGIDDLENKSKDSLVDIIGICKSYEDATKITVRSNNREVAKRNI-YLMDTSGK
   |  ||    |    |            ||                  |         
-GLQNRFTQF-RL-SETKE-ITNPYAM-RLYESLCQYR-KPDGSGIVSLKIDWIIERY-Q
VVTATLWGEDADKFDGSRQPVLAIKGARVSDFGGRSLSVLSSSTIIANPDIPEAYKLRGW
           | |   |   |      |     |       | |               
-LPQS-YQRMPD-F--RRR-FLQV--C-VNEINSRT-P-MRLSYIEKKKGRQTTHIVFS-
FDAEGQ
|     
F-RDIT
1jmc 1rep   34  238  214  14.29
KVVPIASLTPYQSKWTICARVTNKSQIRTWSNSRGEGKLFSLELVDESGEIRATA-FNEQ
      ||      ||     ||   | |  |  |    |    |  ||     |     
E-LKV-SLEE-RDLWTRFKELTNE-MIVT-KN--GR-RMFPVLKVSMSG-LDPNAMYTVL
VDKFFPLIEVNKVYYFSKGTLKIANKQFTAVKNDYEMTFNNETSVMPCEDDHHLPTVQFD
 | |      |      |      |     |          |     |    | |     
LD-FV-AAD-N--HRW-K--Y-V-NGEW--VPGG-K-P---EPQAPSCV-YIH-PDSP-N
FTGIDDLENKSKDSLVDIIGICKSYEDATKITVRSNNREVAKRNIYLMDTSGKVVTATLW
| |          | |      |       |   |       | |      |   |    
F-GAHWMKDPVSFSKVKLTN--K-MNGGGQIMLNSLHK-YEPR-IHIVRVGG---TQRM-
GEDADKFDGSRQPVLAIKGARVSDFGGRSLSVLSSSTIIANPDIPEAYKLRGWFDA-EGQ
      |    |    |  | |          |    |  ||    |  |    || |  
-ITSHSFP-ETQ--F-I--A-VTAYQNEEITAL--K-IKHNP-FAKAF-L----DAKERN


1jmc 1xbr   50  238  184  21.01
---------K---V---V-----PIAS---L-TPY-------QS-------K-WTIC--A
         |   |   |      | |   |   |       |        |        
LDKQKELDSKVRNVKDKVMCIEHEIKSLEDLQDEYDFKCKTLQNREHLLLKKMYLMLDNK
R--VT-------N--K-SQ---I--R-T-W---SNSR---G--EG---KL---FSL--E-
|  |        |     |   |      |     |    |        |   |    | 
RKEVVHKIIELLNVTELTQNALINDELVEWKRRQQSACIGGPPNACLDQLQNWFTIVAES
L--V-DE--S-GEI--RAT----AF--NEQV--DK-F--F-PLIE----VNK---V--Y-
|  |        |     |        | ||  |  |  |  ||     |          
LQQVRQQLKKLEELEQKYTYEHDPITKNKQVLWDRTFSLFQQLIQSSFVVERQPCMPTHP
Y--F-SK-G---T--LKIANK-Q---FT-AVK---N-DY-EM-T------FN---NETSV
      | |   |  |    | |       ||     |  |  |      ||     | |
QRPLVLKTGVQFTVKLRLLVKLQELNYNLKVKVLFDKDVNERNTVKGFRKFNILGTHTKV
MPCED--------D--H-HL-------------P---T--V-QFDF-T-----G-IDDLE
|  |            |  |             |   |       | |     |   |||
MNMEESTNGSLAAEFRHLQLKEQKNAGTRTNEGPLIVTEELHSLSFETQLCQPGLVIDLE
NKSKDSLV--DI--I--GICK-S-Y-----E--DAT-KIT---VR----SN--N-R--EV
  |    |         |      |     |        |    |    |         |
TTSLPVVVISNVSQLPSGWASILWYNMLVAEPRNLSFFLTPPCARWAQLSEVLSWQFSSV
AKR--NI-YL-M--D------TS--G--------KV-VT-AT----LWGED-AD---K--
 ||  |   | |          |  |        |           || |       |  
TKRGLNVDQLNMLGEKLLGPNASPDGLIPWTRFCKENINDKNFPFWLWIESILELIKKHL
---F-D----G--S----R------QP---VL----AIK-GA---R-V--SDFGGR-SL-
     |    |  |    |      ||    |        ||     |  |  ||     
LPLWNDGCIMGFISKERERALLKDQQPGTFLLRFSESSREGAITFTWVERSQNGGEPDFH
SV-------LSSST---II-------A-N-PDIP-E-AY-KL-R----G-WFD----AE-
 |       ||  |   ||       | | |  |    |         |         | 
AVEPYTKKELSAVTFPDIIRNYKVMAAENIPENPLKYLYPNIDKDHAFGKYYSRGIKTEL
-G-Q
    
ISVS
1jmc 1bf5  107  238  544  19.67
---KV--VPIASL--T-PYQSKWTIC-A-----R-VT-NK-SQIRT-WSN--SRGEG-K-
          | |      |       |       |   |                  | 
LSGRLNWQALAGLKASGAEQNLYNVFNAVFEGTKYVLYEKPKHLKNLYAQVVLPDDVIKE
LFS-L-EL-VDESGEIRATAF-NEQVDK-FFPLI---E--V-NKVYYFSKGTL-KIANKQ
 |  |  |     |   | |  |    |  |  |      |  |      |       | 
IFNPLIDLSTTQWGVSPAFAIENTETHKILFGEIKRQDGWVEGKDPSAGRGNAHERSCKL
FT-AVKNDYEMTFN-NETSVMP---C-E-D---D-HHLPTVQFDFTGI-DD--L-E-NKS
||      |      |     |     | |   |        |      |       | |
FTPGLLKAYRTIGGINDEEILPFWVVFEGDITRDPKRVREITFWYDHYQDNYFMWRPNES
KDSLVDIIG-ICKSYEDATKITVRSNNREVA--K-----RNIY-LMD-T-SG-K-VV---
   ||       | | |      | |    |  |      | |        | | |    
GEKLVQHFNEKLKKYLDKSELSGRLNWQALAGLKASGAEQNLYNVFNAVFEGTKYVLYEK
---TATLWG-----EDADK--F----D-GSRQ----PVLAI------K---G--AR----
      |        |  |  |    |    |    |  ||      |   |   |    
PKHLKNLYAQVVLPDDVIKEIFNPLIDLSTTQWGVSPAFAIENTETHKILFGEIKRQDGW
V--SD--FG-G----RS--L-S--VLSS-STI--IANPDI-P-----EA-Y----K-LR-
|   |   | |    ||  |     |    ||  |    | |     |       |  | 
VEGKDPSAGRGNAHERSCKLFTPGLLKAYRTIGGINDEEILPFWVVFEGDITRDPKRVRE
-G-W---F-D------A-E-G----Q-----------
   |     |        | |    |           
ITFWYDHYQDNYFMWRPNESGEKLVQHFNEKLKKYLD
1jmc 1d02   80  238  397  20.15
-K-V--VPIAS--LTPYQ-SKWTI--C-A---R-VT--NKSQI-RT--WS-N-SRGEG-K
 |              |    |    | |   |     |      |        |     
MKETRYCAVCNDYASGYHYGVWSCEGCKAFFKRSIQGHNDYMCPATNQCTIDKNRRKSCQ
LFSLELVDESG--EIRATAF-NEQVDKF-FPL--IEVNKVYY-FS-KG-T-LKI-ANKQF
   |    | |    |  |  |             |  |     |  |       |  | 
ACRLRKCYEVGMMKTRYCAVCNDYASGYHYGVWSCEGCKAFFKRSIQGHNDYMCPATNQC
TAVKN---DYE-MTFNN--ETSVMPCEDDHHLPTVQFDF-TGID-DLEN-KS-KDSLV-D
|  ||              |   |          |  |   |           |      
TIDKNRRKSCQACRLRKCYEVGMMKMKETRYC-AVCNDYASGYHYGVWSCEGCKAFFKRS
IIGICKSYE-DAT-KITVRSNNREVAKR-NIYLMDTSGKVVTATLWGEDADKF-DGSRQP
| |    |   ||   |   | |              |     |           |    
IQG-HNDYMCPATNQCTIDKNRRKSCQACRLRKCYEVGMMKKETRYCAVCNDYASGYHYG
VLAIKGARV--S-DFGGRSL-SVLSSSTIIAN-PDIPEAYKLRGWFDAEG--Q
|    |          |          ||  |      |  ||      |   
VWSCEGCKAFFKRSIQGDYMCPATNQCTIDKNRRKSCQACRLRKCYEV-GMMK
1jmc 1hcq   51  238  290  17.59
KVVPIASLTPYQSKWTICARVTNKSQIRTWSNSRGEGKLFSLELVDESGEIRATAFN-EQ
     |      |           |  |       |  |   ||  |  |||    | ||
ALTK-AEM----SEY-LFDKL-GLSK-R---DAK-E--L--VELFFE--EIRRALENGEQ
VDKFFPLIEVNKVYYFSKGTLKIANKQFTAVKNDYEMTFNNETSVMPCEDDHHLPTVQFD
| |       |      |      |   |    |   |        |      |      
V-KLSG-FG-N-FDLRDKNQRPGRNPK-TG-E-DIPITARRVVTFRP---GQKLKS-RVE
FTGIDDLENKSKDSLVDIIGICKSYEDATKITVRSNNREVAKRNIYLMDTSGKVVTATLW
         ||   |        |   | | ||     |            |        
-NASPKM-TKS-E-LIERLATQQSHIPA-K-TVEDAVKEMLEHMASTL-AQGERIEIRGF
GEDADKFDGSRQPVLAIKGARVSDFGGRSLSVLSSSTIIANPDIPEAYKLRGWFDAEGQ
|         | |     | |    |      |        |       ||      | 
GSFSLHY---RAP--R-TG-RNPKTGDK-VE-LEGK-YV--PHFKPGKELRDRANIYG-
1jmc 1ihf   46  238  190  19.33
KVVPIASLTPYQSKWTICARVTNKSQIRTWSNSRGEGKLFSLELVDESGEIRATAFNEQV
         | |          |    | |   | |     | ||      |  |  |  
-MKGMSKM-P-Q--F-------N---LR-W--PR-E--V--LDLV------RKVA--E--
DKFFPLIEVNKVYYFSKGTLKIANKQFTAVKNDYEMTFNNETSVMPCEDDHHLPTVQFDF
       | |       |           | |  |        ||  |           |
-------E-N-------G------R---SV-NS-EI-Y--Q-RVM--E------S----F
TGIDDLENKSKDSLVDIIGICKSYEDATKITVRSNNREVAKRNIYLMDTSGKVVTATLWG
        | |      ||  |      |             |  |            | 
--------K-KEG--R-IGM-KG---MSK--M-P---QF---N--L-----R------WP
EDADKFDGSRQPVLAIKGARVSDFGGRSLSVLSSSTIIANPDIPEAYKLRGWFDAEGQ
      |      |      |    ||  ||  |  |       |  |  |     | 
REV--LD------L-VR--KVAEENGR--SV-NSE-IYQR--VMESFKKEG--RI-GA
1jmc 1par   45  238  105  18.91
KVVPIASLTPYQSKWTICARVTNKSQIRTWSNSRGEGKLFSLELVDESGEIRATAFNEQV
             |        ||   |         |           |   |    ||
--TR-GRV---KIKMEF---IDNK--LRRYT-TFSKRKT-GI-M-KKAYEL-STLTGTQV
DKFFPLIEVNKVYYFSKGTLKIANKQFTAVKNDYEMTFNNETSVMPCEDDHHLPTVQFDF
       |   || |   | |    |        | |         |      |    | 
-LLLVASETGHVYTFA--TRKL---Q-PMI-TS-E-T--GKALIQTCLNS---P----DT
TGIDDLENKSKDSLVDIIGICKSYEDATKITVRSNNREVAKRNIYLMDTSGKVVTATLWG
 |      | |    |       |   |  |  |  |   |  |  |    |   |    
RG--RV--KIKMEFID-NKL-RRY---T--TF-S-KR---KTGI--M--K-K---A--Y-
EDADKFDGSRQPVLAIKGARVSDFGGRSLSVLSSSTIIANPDIPEAYKLRGWFDAEGQ
|      |  | ||    |  |   |    |    |    | |               
E-LSTLTGT-Q-VLLLV-A--SE-TGH---VYTFATRKLQPMITSETG-KALIQT-CL
1jmc 1srs   47  238  164  19.75
KVVPIASLTPYQSKWTICARVTNKSQIRTWSNSRGEGKLFSLELVDESGEIRATAFNEQV
    | |  | |      |        |           |   |             || 
----I-S--P-Q------A--------R----A------F---L-------------EQ-
DKFFPLIEVNKVYYFSKGTLKIANKQFTAVKNDYEMTFNNETSVMPCEDDHHLPTVQFDF
           |  |         ||                |                 
-----------V--F-R---R---KQ----------------S-----------------
TGIDDLENKSKDSLVDIIGICKSYEDATKITVRSNNREVAKRNIYLMDTSGKVVTATLWG
     | | ||          |  |            ||||         |     |   
-----L-N-SK----E-----K--E------------EVAKK-------CG--I--T---
EDADKFDGSRQPVLAIKGARVSDFGGRSLSVLSSSTIIANPDIPEAYKLRGWFDAEGQ
           | |     ||  |             | |         |        
-----------P-LQV---RVW-F-------------I-N----K--RMR----S---
1jmc 1yrn   35  238   49  14.71
KVVPIASLTPYQSKWTICARVTNKSQIRTWSNSRGEGKLFSLELVDESGEIRATAFNEQV
  |     |    |         |  |    |   | |  |      |  |   |     
MEVEKEFITD-EAK-ELLSK--DK-LIQQAYN---EVKT-S--IC--S-PI-WPA----T
DKFFPLIEVNKVYYFSKGTLKIANKQFTAVKNDYEMTFNNETSVMPCEDDHHLP-TVQFD
 | |  |  |       |   |     |     |             |     |  |   
SKTF-TI--NNTEKNCNGVVPIKELCYTLLEDTYNWYREKPLDILKLEKKKGGPIDVYKE
FTGIDDLENKSKDSLVDIIGICKSYEDATKITVRSNNREVAKRNIYLMDTSGKVVTATLW
|  |   | |          |        |        |     | ||    |     | 
F--IENSELKRVGMEFETGNISSAHRSMNKLLLGLKHGEIDLA-IILMPI--KQLAYYL-
GEDADKFDGSRQPVLAIKGARVSDFGGRSLSVLSSSTIIANPDIPEAYKLRGWFDAEGQ
      |     |           | |       |      | ||   |  |  |  | 
TDRVTNFE-ELEPYFELTEGQPFIFIGFNAEAYNSN--V--PLIP---K--G-SD--GM
1jmc 1bhm   47  238  198  19.75
KVVPIASLTPYQSKWTICARVTNKSQIRTWSNSRGEGKLFSLELVDESGEIRATAFNEQV
           |    || |   |             |   |     |         |  
E----------QA-CDIC-RL--K-------------K---LK-C--S---K-----E--
DKFFPLIEVNKVYYFSKGTLKIANKQFTAVKNDYEMTFNNETSVMPCEDDHHLPTVQFDF
 |  |     |     |  ||  |       |  |      |   |     || |     
-K--P-----KC---AK-CLK--N-------N-WECRYSPKTKRSPL-TRAHL-T-EVE-
TGIDDLENKSKDSLVDIIGICKSYEDATKITVRSNNREVAKRNIYLMDTSGKVVTATLWG
     ||        |   ||       |        |  |          |      | 
SRLERLE---Q-A-CD---ICR-LK---KL--KC-SKE--KPK-----CA-KCLKNN-W-
EDADKFDGSRQPVLAIKGARVSDFGGRSLSVLSSSTIIANPDIPEAYKLRGWFDAEGQ
|       |  |    |  | |    |    |   |        |   |      |  
E-C-RY--S--P--KTK--R-SPL-TRA-H-L---T-----EV-ES-RL------ERL
1jmc 1d66   45  238  114  18.91
KVVPIASLTPYQSKWTICARVTNKSQIRTWSNSRGEGKLFSLELVDESGEIRATAFNEQV
         |         |      |    |     |        |          || 
------G-RP---------R----A-I----N-----K----H---E--Q-------EQI
DKFFPLIEVNKVYYFSKGTLKIANKQFTAVKNDYEMTFNNETSVMPCEDDHHLPTVQFDF
     | |        ||                           |      |      |
SR---LLE--------KG---------------H-----------P-R--QQL-AI-I-F
TGIDDLENKSKDSLVDIIGICKSYEDATKITVRSNNREVAKRNIYLMDTSGKVVTATLWG
 |               ||   |       |             |               
-G---------------IGV--S-------T------------LY------R------Y-
EDADKFDGSRQPVLAIKGARVSDFGGRSLSVLSSSTIIANPDIPEAYKLRGWFDAEGQ
     |     |      |              ||       |    | |        
-----F-----P------A--------------SS-------I-K--K-R--MN----
1jmc 1hcr   29  238   52  12.18
KVVPIASLTPYQSKWTICARVTNKSQIRTWSNSRGEGKLFSLELVDESGEIRATAFNEQV
      | |    |         |    |      |     ||  |      |    |  
------S-T----K-----K---K-PL-T----Q-E-Q---LE--D-ARRLKA-IY-EK-
DKFFPLIEVNKVYYFSKGTLKIANKQFTAVKNDYEMTFNNETSVMPCEDDHHLPTVQFDF
 |       |       | |     |   |  |  |       |        |    |  
-K-----K-NEL-----G-L---S-Q-ESVA-D-KMGM-GQSGV-GA-----L----FN-
TGIDDLENKSKDSLVDIIGICKSYEDATKITVRSNNREVAKRNIYLMDTSGKVVTATLWG
 ||    |     |         |  |            ||  | |     | |      
-GI----N----AL-N------AY-NAA-L--------LAK--I-L-----K-V--SV--
EDADKFDGSRQPVLAIKGARVSDFGGRSLSVLSSSTIIANPDIPEAYKLRGWFDAEGQ
|    |  |  |   |  |       |               |   |       |   
E--E-F--S--P--SI--A-------R--------------EI---YEM---YEAV-S
1jmc 1lmb   44  238   92  18.49
KVVPIASLTPYQSKWTICARVTNKSQIRTWSNSRGEGKLFSLELVDESGEIRATAFNEQV
           |       || |  |        | |  |        |  |    |   
-----------Q------GRV-N--QL-------G-G-VF----I--NG--RPLP-N-NI
DKFFPLIEVNKVYYFSKGTLKIANKQFTAVKNDYEMTFNNETSVMPCEDDHHLPTVQFDF
       |         |   |                    |   |     |   |   
-R-LKIVEM--A---ADG---I--RP-CVISR--QL----RVS-HGCV-SKILNRYQ-E-
TGIDDLENKSKDSLVDIIGICKSYEDATKITVRSNNREVAKRNIYLMDTSGKVVTATLWG
||            |  ||  |    ||       ||       |     |       | 
TG--SI----RPG-V--IGGSKP-RIATP-EI--ENR-I-E-E-YKRSSPG-MF--S-W-
EDADKFDGSRQPVLAIKGARVSDFGGRSLSVLSSSTIIANPDIPEAYKLRGWFDAEGQ
|        |   | |   |     |    |   ||  | |    |   |        
E----I---REK-L-I---R--E--G----VCDRST--A-PSV-SAIS-R--L-V---
1jmc 1pdn   44  238  123  18.49
---KVV--P-IASLT-PY--Q--SKWTI--CARVTN-KS--QIRTWSNSRGEGKLFSLEL
        |        |     |           | ||  |     |  |  |     |
PYLQILEQPKQRGFRFRYVAEGPSHGGLPGASSEKNKKSYPQVKI-CNYVGPAKVI-VQL
V-D-ESGEIRA-TAFNEQVDKFFPLIEVN-K--VYYFSK-GTLKIANKQ-F-T--A-V-K
|         |                   |  |  |   | |    |  | |  |    
VTNGKNIHLHAHSLVGKHCEDGICTVTAGPKDMVVGFANLGILHVTKKKVFETLEARMTE
---NDYE--MTFNNETSVMPCE--DDHHLPTVQFDFTGIDDL-ENKSKD-SLVDII--G-
     |               |   |  |            |   |  | | |       
ACIRGYNPGLLVHPDLAYLQAEGGGDRQLGDREKELIRQAALQQTKEMDLSVVRLMFTAF
ICKSYEDAT-KI-TVRSN---NREVAK-RNI-YL-MD-TSGKVVTA-TLWGE-D-ADKFD
   |    |     | |            |     || | | |          |   | |
LPDSTGSFTRRLEPVVSDAIYDSKAPNASNLKIVRMDRTAGCVTGGEEIYLLCDKVQKDD
-GSRQPVLAIKGARVSDFGGRS-LSVLSSSTII-ANP---D--I--P-EAY-KLRGWFD-
   |       |     ||  |   |     |    |   |  |  |      ||   | 
IQIRFYEEEENGGVWEGFGDFSPTDVHRQFAIVFKTPKYKDINITKPASVFVQLRRKSDL
--AE-------GQ
   |         
ETSEPKPFLYYPE
1jmc 1svc   59  238  311  18.97
KVVPIASLTPYQSKWTICARVTNKSQIRTWSNSRGEGKLFSLELVDESGEIRATAFNEQV
|  | | |     |    || |     |  |  |   |     |       |      | 
K-DP-AAL-----K-R--ARNTEAAR-R--SRAR---K-----L-----Q-R---M-KQ-
DKFFPLIEVNKVYYFSKGTLKIANKQFTAVKNDYEMTFNNETSVMPCEDDHHLPTVQFDF
     | |  ||       |          || |     ||  |        |       
-----L-E-DKV---EE--L-L------S-KN-YHL--ENE--V--A----RL---K-KL
TGIDDLENKSKDSLVDIIGICKSYEDATKITVRSNNREVAKRNIYLMDTSGKVVTATLWG
 |    |   ||         |     |    |   |  | |    |    |     |  
VG----E-RMKDP-A---AL-KRARN-TE-AAR-RSR--A-RKLQRM----K----QL--
EDADKFDGSRQPVLAIKGARVSDFGGRSLSVLSSSTIIANPDIPEAYKLRGWFDAEGQ
|  ||        |  |              |       |     |  |       | 
E--DKVE---E-LLS-K-----NY--H----L--E----N-EV--A-RLKK-L-V-GE
1jmc 1ysa   50  238  114  21.01
KVVPIASLTPYQSKWTICARVTNKSQIRTWSNSRGEGKLFSLELVDESGEIRATAFNEQV
         |   |    |    |   |         |          |    |   |  
---------P---K----A----K---R----A----K----H---PPG----T---E--
DKFFPLIEVNKVYYFSKGTLKIANKQFTAVKNDYEMTFNNETSVMPCEDDHHLPTVQFDF
 |  |          |         |  |            |    |      |      
-K--P-----R----SR-S-Q--SEQ-PA------------T----C------P------
TGIDDLENKSKDSLVDIIGICKSYEDATKITVRSNNREVAKRNIYLMDTSGKVVTATLWG
                   ||  |  |         |    ||              |  
-------------------IC--Y--A--V-I----RQ-S-RN--------------L--
EDADKFDGSRQPVLAIKGARVSDFGGRSLSVLSSSTIIANPDIPEAYKLRGWFDAEGQ
         |   |     |   |              |    |      |       
----R----RH--LEL---R--HF--------------AK---P------G---V---
1jmc 1yui   32  238   54  13.45
KVVPIASLTPYQSKWTICARVTNKSQIRTWSNSRGEGKLFSLELVDESGEIRATAFNEQV
            |    |                     |   |   ||    || | | 
------------S----C---------------------FA--LI--SG----TA-N-Q-
DKFFPLIEVNKVYYFSKGTLKIANKQFTAVKNDYEMTFNNETSVMPCEDDHHLPTVQFDF
        | | | |     |  |         ||    |      |       |    |
--------V-KCYRF-R--VK-KN-H----RHRYE----N------C-------TTTW-F
TGIDDLENKSKDSLVDIIGICKSYEDATKITVRSNNREVAKRNIYLMDTSGKVVTATLWG
|   |  |          |     |       |      |   | |          |   
T-VAD--N----------G---A-E-------R-QG-Q-A-Q-I-L-------I--T---
EDADKFDGSRQPVLAIKGARVSDFGGRSLSVLSSSTIIANPDIPEAYKLRGWFDAE-GQ
     | ||  |       |  ||       |        |  |      | | |    
-----F-GS--P--S-Q--R-QDF-------L-KH--V--P-LPPGMNISG-FTASLDF
1jmc 2bop   45  238   85  18.91
KVVPIASLTPYQSKWTICARVTNKSQIRTWSNSRGEGKLFSLELVDESGEIRATAFNEQV
                            |        |        | ||   |      
----------F-----------------T--------K--------E-GE-H-T-Y--RC
DKFFPLIEVNKVYYFSKGTLKIANKQFTAVKNDYEMTFNNETSVMPCEDDHHLPTVQFDF
 |         | |    |            |     |        |   |    |    
-K----V-CSRV-Y----T----H-----ISN-----F--------CR--HY---V----
TGIDDLENKSKDSLVDIIGICKSYEDATKITVRSNNREVAKRNIYLMDTSGKVVTATLWG
|                     |     |   |  |  | |   |               
T---------------------SH----K---R--N--V-K--VY---PC-P-F-C--F-
EDADKFDGSRQPVLAIKGARVSDFGGRSLSVLSSSTIIANPDIPEAYKLRGWFDAEGQ
     |   |      |     |            |  |        |          
K--E-F--TR------K-----D------N-M---T--AH--V----KI---I--H-K
1jmc 2drp   30  238   63  12.61
----------------------------------------K------------------V
                                        |                  |
KPPYSYIALITMAILQSPQKKLTLSGICEFISNRFPYYREKFPAWQNSIRHNLSLNDCFV
------------------------------------V--P------I--A---S----LT
                                    |  |      |  |   |    ||
KIPREPGNPGKGNYWTLDPQSEDMFDNGSFLRRRKRVKPPYSYIALITMAILQSPQKKLT
------------P-Y-------Q-------S----------------K---W--------
            | |       |       |                |   |        
LSGICEFISNRFPYYREKFPAWQNSIRHNLSLNDCFVKIPREPGNPGKGNYWTLDPQSED
------------------------------------T---IC---------------A--
                                    |   ||               |  
MFDNGSFLRRRKRVKPPYSYIALITMAILQSPQKKLTLSGICEFISNRFPYYREKFPAWQ
---R---------V---------------T----------N----------K--------
   |         |               |          |          |        
NSIRHNLSLNDCFVKIPREPGNPGKGNYWTLDPQSEDMFDNGSFLRRRKRVKPPYSYIAL
-------S-Q-----------I-------R----TW--S---N-S---------R-----
       | |           |       |     |  |   | |         |     
ITMAILQSPQKKLTLSGICEFISNRFPYYREKFPAWQNSIRHNLSLNDCFVKIPREPGNP
--G---------E-----G-----------------------------K--L-----F-S
  |         |     |                             |  |     | |
GKGNYWTLDPQSEDMFDNGSFLRRRKRVKPPYSYIALITMAILQSPQKKLTLSGICEFIS
--L----E------------L-V-D-------E--S---G---------E--------I-
       |            |   |       |      |         |          
NRFPYYREKFPAWQNSIRHNLSLNDCFVKIPREPGNPGKGNYWTLDPQSEDMFDNGSFLR
---R--------A--T-A----------------F--N------E-----Q--V------
   |        |  | |                |  |      |     |         
RRKRVKPPYSYIALITMAILQSPQKKLTLSGICEFISNRFPYYREKFPAWQNSIRHNLSL
-D-------------K-------------F----F------------------------P
 |             |             |    |                        |
NDCFVKIPREPGNPGKGNYWTLDPQSEDMFDNGSFLRRRKRVKPPYSYIALITMAILQSP
-----L--I-E-V-NKV-YY---F-----------S----------------K-------
     |  | |   |   ||   |           |                |       
QKKLTLSGICEFISNRFPYYREKFPAWQNSIRHNLSLNDCFVKIPREPGNPGKGNYWTLD
---------G-------------------T---L-----K---------I----------
         |                   |   |     |         |          
PQSEDMFDNGSFLRRRKRVKPPYSYIALITMAILQSPQKKLTLSGICEFISNRFPYYREK
--A-----------------------N--K--------Q---------F-----------
  |                       |  |        |         |           
FPAWQNSIRHNLSLNDCFVKIPREPGNPGKGNYWTLDPQSEDMFDNGSFLRRRKRVKPPY
------T-A-----------------V---------K--------------ND-------
      | |                           |              ||       
SYIALITMAILQSPQKKLTLSGICEFISNRFPYYREKFPAWQNSIRHNLSLNDCFVKIPR
---------Y-------E--------------------------M----------T----
         |       |                          |          |    
EPGNPGKGNYWTLDPQSEDMFDNGSFLRRRKRVKPPYSYIALITMAILQSPQKKLTLSGI
--------------F---------N---N--------E----------T-----------
              |         |   |        |          |           
CEFISNRFPYYREKFPAWQNSIRHNLSLNDCFVKIPREPGNPGKGNYWTLDPQSEDMFDN
-S-------V-----------M-----P---------CE----------D------D---
 |       |           |     |         ||                     
GSFLRRRKRVKPPYSYIALITMAILQSPQKKLTLSGICEFISNRFPYYREKFPAWQNSIR
HH--L-------------P------TV--Q----FD---F--------------------
|   |             |      |   |    ||   |                    
HNLSLNDCFVKIPREPGNPGKGNYWTLDPQSEDMFDNGSFLRRRKRVKPPYSYIALITMA
---------T--G----I--------D----------------D----L--E--N--K--
         |  |    |                         |       |  |  |  
ILQSPQKKLTLSGICEFISNRFPYYREKFPAWQNSIRHNLSLNDCFVKIPREPGNPGKGN
-------SK---D--S-L-----V----D----I---I-----------GIC--------
       |    |  | |     |         |   |           |||        
YWTLDPQSEDMFDNGSFLRRRKRVKPPYSYIALITMAILQSPQKKLTLSGICEFISNRFP
----K------------S-------------------Y-------E---D----------
    |            |                   |       |   |          
YYREKFPAWQNSIRHNLSLNDCFVKIPREPGNPGKGNYWTLDPQSEDMFDNGSFLRRRKR
--------A--T---------KIT-------V-------R--------S---N---N---
        |  |         | |               |        |   |   |   
VKPPYSYIALITMAILQSPQKKLTLSGICEFISNRFPYYREKFPAWQNSIRHNLSLNDCF
----R-----------------E--------------V------------A-------K-
    |                 |              |            |       | 
VKIPREPGNPGKGNYWTLDPQSEDMFDNGSFLRRRKRVKPPYSYIALITMAILQSPQKKL
----------------R-------N-I-Y-L-M-D------------------T----S-
                |       | |   |   |                  |    | 
TLSGICEFISNRFPYYREKFPAWQNSIRHNLSLNDCFVKIPREPGNPGKGNYWTLDPQSE
-----G------K-V---------VT-A---------TL--------------------W
     |      | |          | |         ||                    |
DMFDNGSFLRRRKRVKPPYSYIALITMAILQSPQKKLTLSGICEFISNRFPYYREKFPAW
--------------------------G---------E---D-------------------
                          |         |   |                   
QNSIRHNLSLNDCFVKIPREPGNPGKGNYWTLDPQSEDMFDNGSFLRRRKRVKPPYSYIA
-----------------------------------A------------D-----------
                                   |            |           
LITMAILQSPQKKLTLSGICEFISNRFPYYREKFPAWQNSIRHNLSLNDCFVKIPREPGN
--K-------------FD-GS------R-Q-P---V-L---AI------K----G-----
  |             || ||      |   |     |   ||      |    |     
PGKGNYWTLDPQSEDMFDNGSFLRRRKRVKPPYSYIALITMAILQSPQKKLTLSGICEFI
------------A-----R--VS--D-F-------G--GR-----------------S-L
            |     |   |  | |       |  |                  | |
SNRFPYYREKFPAWQNSIRHNLSLNDCFVKIPREPGNPGKGNYWTLDPQSEDMFDNGSFL
----------S-V-L-S-S---S-----T---I---I------------A----------
          |   |       |     |   |   |            |          
RRRKRVKPPYSYIALITMAILQSPQKKLTLSGICEFISNRFPYYREKFPAWQNSIRHNLS
------------------N-----P------D------------------------I---
                  |     |      |                        |   
LNDCFVKIPREPGNPGKGNYWTLDPQSEDMFDNGSFLRRRKRVKPPYSYIALITMAILQS
P----------E--A-----Y--K-------------L--------R-------G--W-F
|          |        |  |             |        |       |  |  
PQKKLTLSGICEFISNRFPYYREKFPAWQNSIRHNLSLNDCFVKIPREPGNPGKGNYWTL
D--AE-----G-------Q
|   |     |        
DPQSEDMFDNGSFLRRRKR
1jmc 2hdc  204  238 1939  10.52
KVVPIASLTPYQSKWTICARVTNKSQIRTWSNSRGEGKLFSLELVDESGEIRATAFNEQV
        |     |  |      ||      |  |  |        | |       |  
E-------T--DCRWDGC------SQ-E-F-DSQ-E-QL--VHHIN-S-E-H--IHGER-
DKFFPLIEVNKVYYFSKGTLKIANKQFTAVKNDYEMTFNNETSVMPCEDDHHLPTVQFDF
 | |    |        |        | |    |             |  |   |  |  
-KEF----V--CHW-G-GCSR-ELRPFKA-Q--YMLVVHMRRHT-G-EKPHKC-T--FE-
TGIDDLENKSKDSLVDIIGICKSYEDATKITVRSNNREVAKRNIYLMDTSGKVVTATLWG
 |      ||  |        |     |    ||   |  |   |     |    |    
-G---C-RKSY-SRLE--NL-K-----THL--RSHTGE--K-P-YMCEHEG-CSKA--FS
EDADKFDGSRQPVLAIKGARVSDFGGRSLSVLSSSTIIANPDIPEAYKLRGWFDAEGQ
   |      |          |         |   |     | |            | 
NASDR--AKHQ---N-R-TH-SN-EKPYVCKLPGCT-KRYTD-PSSLR-KHVKTVHG-
1jmc 2gli   43  238  155  18.07
KVVPIASLTPYQSKWTICARVTNKSQIRTWSNSRGEGKLFSLELVDESGEIRATAFNEQV
                         |  |              |   | | |        
-------M-----------------Q--T--------------L---S-E-R--------
DKFFPLIEVNKVYYFSKGTLKIANKQFTAVKNDYEMTFNNETSVMPCEDDHHLPTVQFDF
     |    |     |    |      | |    ||    |     |    |       
-----L----K-----K-R-RI------ALK----MT---QT-----E----L--A----
TGIDDLENKSKDSLVDIIGICKSYEDATKITVRSNNREVAKRNIYLMDTSGKVVTATLWG
|         |       |  |           |           |    |  |  |   
T---------K-A-----GV-K--Q-------QS----I--Q---LIE-AG--V--T---
EDADKFDGSRQPVLAIKGARVSDFGGRSLSVLSSSTIIANPDIPEAYKLRGWFDAEGQ
    |    | |       |   |    |          | | |    |         
----K----R-P-------R---F----LFEIAMA--L-NCD-P-VW-LQ--Y-GT-K
1jmc 3cro   36  238   66  15.13
DALCRELWHACAGPLVTLPREGERVYYFPEGHMEQLEASMHQGLEQQMPSFNLPSKILCK
       |     ||      |    |  |      |         | |    |      
-------W-----PL-S-SQSGS---Y--E--L-RIE------V--Q-P--K-P------
VINIQRRAEPETDEVYAQITLLPELDQSEPTSPDAPVQEPEKCTVHSFCKTLTASDTSTH
      ||  || |               ||    ||        |              
--H--HRAHYET-E--G--S-RGAV-KA-PTG-GHPV--VQ---LHGY---M---ENKPL
GGFSVLRRHADDCLPPLDMSQQPPWQELVATDLHNSEWHFRHIFRGQPRRHLLTTGWSVF
 |       ||     |      |     |        | | |  |       ||  |  
-GLQIFIGTADERI--L----K-P--H--A--FY--QVH-R-I-TG--KT-VTTT--S-Y
VSSKKLVAGDAFIFLRGENEELRVGVRRHMRQPSSVISSHSMHIGVLATAAHAITTGTIF
    | | |     |  |   |       ||     |       | |     |     | 
---EKIV-GNTKV-L--E-IPLE--PKNNMR--AT-IDC-A---GIL-KLRNA----DI-
SVFYKPRTSRSEFIVSVNRYLEAKTQKLSVGMRFKMRFEGKRFSGTIVGVQENKSSVWHD
      |    |      |     |        |         || ||  |         
EL----R--KGE--TDIGR--K-NT-RVRL-V-FRVHIP-ES-SGRIVSLQ---TA----
SEWRSLKVQWDEPSSVFRPERVSPWELEPLNLSDALCRELWHACAGPLVTLPREGERVYY
|          |  |     | |  || |        |     |      |      | |
S---N-PI---E-CS----QR-SAHEL-PM-V-E---RQDTDSC------L------V-Y
FPEGHMEQLEASMHQGLEQQMPSFNLPSKILCKVINIQRRAEPETDEVYAQITLLPELDQ
   |   |       |   |   |   |    ||       |  ||    |     |   
---GG-QQM-I-L-TG---Q--NFT--SE--SKVV-F---TEKTTD---GQ-QIW-EM--
SEPTSPDAPVQEPEKCTVHSFCKTLTASDTSTHGGFSVLRRHADDCLPPLDMSQQPPWQE
 | |  |     |       |           |       |       |           
-EAT-VDKDKSQP-N-ML--FVE-I-PEYRNKH----I--R-T-----PVKVN----F--
LVATDLHNSEWHFRHIFRGQPRRHLLTTGWSVFVSSKKLVAGDAFIFLRGENEELRVGVR
 |     |     |   | ||  |   |     |              |  |        
YV---I-NGK---RK--RSQP-QH-F-T-YHP-V--RR-IRRE-----R--N-KMAAAKS
RHMRQQTNIPSSVISSHSMHIGVLATAAHAITTGTIFSVFYKPRTSRSEFIVSVNRYLEA
|  |                   |     |  |  |     |    |       ||    
RN-RRR-EL-TDTLQAET---DQLEDEKSALQT-EIANLL-KEKEKRKR--MR-NRIAAS
KTQKLSVGMRFKMRFEPEKRFSGTIVGVQENKSSVWHDSEWRSLKVQWDEPSSVFRPERV
|  |     |   | | ||    |    | |       ||   |           | | |
KSRKRKL-ERI-ARLE-EK-VK-TL-KAQ-N-------SE---L-A---STANMLR-EQV
SPWELEPL
       |
A----Q-L
4ldx 1a02  128  668  385  19.16
DALCRELWHACAGPLVTLPREGERVYYFPEGHMEQLEASMHQGLEQQMPSFNLPSKILCK
       |                           |       |                
-TV--Q-W---------------------------L-------LD---------------
VINIQRRAEPETDEVYAQITLLPELDQSEPTSPDAPVQEPEKCTVHSFCKTLTASDTSTH
  |            |            | |   |     |                   
--N------------Y------------E-T---A-----E-------------------
GGFSVLRRHADDCLPPLDMSQQPPWQELVATDLHNSEWHFRHIFRGQPRRHLLTTGWSVF
 |  |              |            |              | |    |     
-G--V--------------S------------L--------------P-R---ST-----
VSSKKLVAGDAFIFLRGENEELRVGVRRHMRQPSSVISSHSMHIGVLATAAHAITTGTIF
     |            |                    |      |    |        
-----L-------Y----N--------------------H--YL--L----H--------
SVFYKPRTSRSEFIVSVNRYLEAKTQKLSVGMRFKMRFEGKRFSGTIVGVQENKSSVWHD
               |         |            |           |  |      
---------------S---------Q------------E-----------Q--K------
SEWRSLKVQWDEPSSVFRPERVSPWELEPLNLSDALCRELWHACAGPLVTLPREGERVYY
     |     |      |  |        |           | |               
-----L-----E------P--V--------N-----------A-A----S----------
FPEGHMEQLEASMHQGLEQQMPSFNLPSKILCKVINIQRRAEPETDEVYAQITLLPELDQ
|              |            | |     |  |                    
F--------------G------------K-L-----I--R--------------------
SEPTSPDAPVQEPEKCTVHSFCKTLTASDTSTHGGFSVLRRHADDCLPPLDMSQQPPWQE
    |            |  |             |   | |                   
----S------------V--F---M---------G---L-R-------------------
LVATDLHNSEWHFRHIFRGQPRRHLLTTGWSVFVSSKKLVAGDAFIFLRGENEELRVGVR
   |                 ||  |  |                          | |  
---T-----------------RR--L--G------T-------------------R-G--
RHMRQQTNIPSSVISSHSMHIGVLATAAHAITTGTIFSVFYKPRTSRSEFIVSVNRYLEA
       |       |            |           |               |   
-------N-------S-K-Y--------H-----------Y---------------Y---
KTQKLSVGMRFKMRFEPEKRFSGTIVGVQENKSSVWHDSEWRSLKVQWDEPSSVFRPERV
       |           |    |                   |               
-------G----L------R----I-------------------K---------------
SPWELEPL
        
A-------
4ldx 1dp7   61  668   76   9.13
DALCRELWHACAGPLVTLPREGERVYYFPEGHMEQLEASMHQGLEQQMPSFNLPSKILCK
    |             ||       |     ||| |     |      ||        
----R-------------PR---TA--F-SS--EQL-A---R-LKRE---FN-------E
VINIQRRAEPETDEVYAQITLLPELDQSEPTSPDAPVQEPEKCTVHSFCKTLTASDTSTH
  |   |        |        |     |         |                   
--N---R--------Y--------L-----T---------E--------R----------
GGFSVLRRHADDCLPPLDMSQQPPWQELVATDLHNSEWHFRHIFRGQPRRHLLTTGWSVF
      ||                 |                    |     |       
------RR-----------------Q--------------------Q-----L-------
VSSKKLVAGDAFIFLRGENEELRVGVRRHMRQPSSVISSHSMHIGVLATAAHAITTGTIF
 ||                 ||                      | |             
-SS-----------------EL----------------------G-L-------------
SVFYKPRTSRSEFIVSVNRYLEAKTQKLSVGMRFKMRFEGKRFSGTIVGVQENKSSVWHD
                 |   ||  |        |       |       | ||      
-----------------N---EA--Q---I----KI-W----F-------Q-NK------
SEWRSLKVQWDEPSSVFRPERVSPWELEPLNLSDALCRELWHACAGPLVTLPREGERVYY
   |  |       |     |       |        |           |          
---RA-KIK--K--S-----R-------P--------R-----------T-------A--
FPEGHMEQLEASMHQGLEQQMPSFNLPSKILCKVINIQRRAEPETDEVYAQITLLPELDQ
|          |     | |     |    | |      |                    
F---------SS-----E-Q-----L-AR-L-K------R--------------------
SEPTSPDAPVQEPEKCTVHSFCKTLTASDTSTHGGFSVLRRHADDCLPPLDMSQQPPWQE
             |                     |                        
-------------E---------------------F------------------------
LVATDLHNSEWHFRHIFRGQPRRHLLTTGWSVFVSSKKLVAGDAFIFLRGENEELRVGVR
       | |   |           | |                         |     |
-------N-E-N-R--Y--------L-T-------------------------E-----R
RHMRQQTNIPSSVISSHSMHIGVLATAAHAITTGTIFSVFYKPRTSRSEFIVSVNRYLEA
|  |||         | |     |         |                    |   ||
R--RQQ-------L-S-S-E---L---------G----------------L---N---EA
KTQKLSVGMRFKMRFEPEKRFSGTIVGVQENKSSVWHDSEWRSLKVQWDEPSSVFRPERV
  |        |        |       | ||         |  |               
--Q---I----KI-W-----F-------Q-NK---------RA-K--------I-K--K-
SPWELEPL
|       
S-------
4ldx 1hdd   81  668  114  12.13
DALCRELWHACAGPLVTLPREGERVYYFPEGHMEQLEASMHQGLEQQMPSFNLPSKILCK
                                       |    |            | |
---------------------------------------M----E------------L-K
VINIQRRAEPETDEVYAQITLLPELDQSEPTSPDAPVQEPEKCTVHSFCKTLTASDTSTH
      |                                  | |      |  | |    
------R----------------------------------K-T------T-NA-D----
GGFSVLRRHADDCLPPLDMSQQPPWQELVATDLHNSEWHFRHIFRGQPRRHLLTTGWSVF
      || |                   ||         |   |   ||  |       
------RRKA-------------------AT-M-------RE--R---RR--L-------
VSSKKLVAGDAFIFLRGENEELRVGVRRHMRQPSSVISSHSMHIGVLATAAHAITTGTIF
  | | |           | |                               |       
--S-K-V-----------N-E-------------------------------A-------
SVFYKPRTSRSEFIVSVNRYLEAKTQKLSVGMRFKMRFEGKRFSGTIVGVQENKSSVWHD
            |        |  |  |            || | |              
------------F--------E--T--L------------KR-S-T--------------
SEWRSLKVQWDEPSSVFRPERVSPWELEPLNLSDALCRELWHACAGPLVTLPREGERVYY
|   |       |       |  |   |       | |      |           |  |
S---S-----N-P-N----QRL-P-KVE---I---L-R---N--A---I-------R--Y
FPEGHMEQLEASMHQGLEQQMPSFNLPSKILCKVINIQRRAEPETDEVYAQITLLPELDQ
         |     ||  |     |    |        |                  | 
--------IE-----GL--Q--A--L----L--------R------------------D-
SEPTSPDAPVQEPEKCTVHSFCKTLTASDTSTHGGFSVLRRHADDCLPPLDMSQQPPWQE
   |            |         | |          || |                 
---T------------T--N------A-D----------RRKA-----------------
LVATDLHNSEWHFRHIFRGQPRRHLLTTGWSVFVSSKKLVAGDAFIFLRGENEELRVGVR
  ||         |   |   ||  |         | | |   |  |   |   |     
--AT-M-------RE--R---RR--L---------S-K-V-NEA--F---ET--L-----
RHMRQQTNIPSSVISSHSMHIGVLATAAHAITTGTIFSVFYKPRTSRSEFIVSVNRYLEA
   |  |   ||           |                  |     | |    |   |
K--R-ST---SS--NP-NQR---L------------------PKV---E-I--L-R--NA
KTQKLSVGMRFKMRFEPEKRFSGTIVGVQENKSSVWHDSEWRSLKVQWDEPSSVFRPERV
         |       |    |     |              |    |           
------I--RY-I----E----G-L---Q----AL--------LR---D-----------
SPWELEPL
        
--------
4ldx 1mdy   90  668  130  13.47
DALCRELWHACAGPLVTLPREGERVYYFPEGHMEQLEASMHQGLEQQMPSFNLPSKILCK
               |       |          ||      |              |  
-S----I--S-S--RV---K-SKRI---------QL------G--------------L--
VINIQRRAEPETDEVYAQITLLPELDQSEPTSPDAPVQEPEKCTVHSFCKTLTASDTSTH
  | |           |      ||         |  |   |  |           | | 
--N-Q-----------A------EL---------A--Q---K--V---------G-T-T-
GGFSVLRRHADDCLPPLDMSQQPPWQELVATDLHNSEWHFRHIFRGQPRRHLLTTGWSVF
                     |   |         |      |   |             
---------------------Q---Q---------S------I-E-Q-------------
VSSKKLVAGDAFIFLRGENEELRVGVRRHMRQPSSVISSHSMHIGVLATAAHAITTGTIF
              |  ||     |     | |                          |
--------------L--EN-----G-KT-KR-P------------------R-------F
SVFYKPRTSRSEFIVSVNRYLEAKTQKLSVGMRFKMRFEGKRFSGTIVGVQENKSSVWHD
     |     |        | |     |                   ||     ||  |
-L---P-----E--------L-A-----S--------------A--L-GV-----SV--D
SEWRSLKVQWDEPSSVFRPERVSPWELEPLNLSDALCRELWHACAGPLVTLPREGERVYY
  |  |        |       |         |    |          |       |   
--W--L-L--N-GTS------IS---------S----R----------V---K-SKRI--
FPEGHMEQLEASMHQGLEQQMPSFNLPSKILCKVINIQRRAEPETDEVYAQITLLPELDQ
       ||      |              |    | |           |      ||  
-------QL------G--------------L----N-Q-----------A------EL--
SEPTSPDAPVQEPEKCTVHSFCKTLTASDTSTHGGFSVLRRHADDCLPPLDMSQQPPWQE
       |  |   |  |           | |                      |   | 
-------A--Q---K--V---------G-T-T----------------------Q---Q-
LVATDLHNSEWHFRHIFRGQPRRHLLTTGWSVFVSSKKLVAGDAFIFLRGENEELRVGVR
        |      |   |                           |  ||     |  
--------S------I-E-Q---------------------------L--EN-----G--
RHMRQQTNIPSSVISSHSMHIGVLATAAHAITTGTIFSVFYKPRTSRSEFIVSVNRYLEA
                                  |      | |  |  |          
---K------------------------------T------K-R-PR--F----------
KTQKLSVGMRFKMRFEPEKRFSGTIVGVQENKSSVWHDSEWRSLKVQWDEPSSVFRPERV
    |           ||        ||     ||  |  |  |                
----L-----------PE--LASAL-GV-----SV--D--W--L-L-----NG-------
SPWELEPL
        
T-------
4ldx 1per   86  668  126  12.87
DALCRELWHACAGPLVTLPREGERVYYFPEGHMEQLEASMHQGLEQQMPSFNLPSKILCK
                  |    |                  |           |     
------------------P----R------------------G-----------S-----
VINIQRRAEPETDEVYAQITLLPELDQSEPTSPDAPVQEPEKCTVHSFCKTLTASDTSTH
                |       |      | |                  |       
----------------A-------L------S-D------------------T--E----
GGFSVLRRHADDCLPPLDMSQQPPWQELVATDLHNSEWHFRHIFRGQPRRHLLTTGWSVF
       | |               | |   |                          | 
-------R-A---------------Q-L---D--------------------------V-
VSSKKLVAGDAFIFLRGENEELRVGVRRHMRQPSSVISSHSMHIGVLATAAHAITTGTIF
    ||        |   |                |    |     |    |        
M---KL--------L---N----------------V----S-----L----H--------
SVFYKPRTSRSEFIVSVNRYLEAKTQKLSVGMRFKMRFEGKRFSGTIVGVQENKSSVWHD
                     |             |                        
---------------------E-------------M------------------------
SEWRSLKVQWDEPSSVFRPERVSPWELEPLNLSDALCRELWHACAGPLVTLPREGERVYY
|  |  |       |     |           |                       |   
S--R--KI------S-----R-----------S-----------------------R---
FPEGHMEQLEASMHQGLEQQMPSFNLPSKILCKVINIQRRAEPETDEVYAQITLLPELDQ
             |                 |    |  |       ||           
-------------H-----------------C----I--R-------VY-----------
SEPTSPDAPVQEPEKCTVHSFCKTLTASDTSTHGGFSVLRRHADDCLPPLDMSQQPPWQE
                                                            
------------------------------------------------------------
LVATDLHNSEWHFRHIFRGQPRRHLLTTGWSVFVSSKKLVAGDAFIFLRGENEELRVGVR
                         |           |    |                 
-------------------------L-----------K----D-----------------
RHMRQQTNIPSSVISSHSMHIGVLATAAHAITTGTIFSVFYKPRTSRSEFIVSVNRYLEA
                                          |        ||   |   
------------------------------------------P--------VS---Y---
KTQKLSVGMRFKMRFEPEKRFSGTIVGVQENKSSVWHDSEWRSLKVQWDEPSSVFRPERV
                      ||                                    
----------------------GT------------------------------------
SPWELEPL
|       
S-------
4ldx 1tc3   48  668   51   7.19
DALCRELWHACAGPLVTLPREGERVYYFPEGHMEQLEASMHQGLEQQMPSFNLPSKILCK
 ||        |     |      |        |  |     |   |   |  |      
-AL---T-N--A-Q-I-L---A--V--I-DS-WE--E-TV--G---Q---F--P------
VINIQRRAEPETDEVYAQITLLPELDQSEPTSPDAPVQEPEKCTVHSFCKTLTASDTSTH
|  |       |          | |            |     | |  |           
V--I-------T---H-HV---P-L--G---G--G-LQ---G-TLH--C-----------
GGFSVLRRHADDCLPPLDMSQQPPWQELVATDLHNSEWHFRHIFRGQPRRHLLTTGWSVF
               ||      |    |          |     | |     |  |   
--Y--------E-I-PL--A--APY-G-V------G---FAK--NG-P-----TR-WQ-Y
VSSKKLVAGDAFIFLRGENEELRVGVRRHMRQPSSVISSHSMHIGVLATAAHAITTGTIF
   |        |     |    | |  | |             |      |  |    |
---KR-----T-I-----N-Q--V-V--H-R----------W--G-----SH--TV-P-F
SVFYKPRTSRSEFIVSVNRYLEAKTQKLSVGMRFKMRFEGKRFSGTIVGVQENKSSVWHD
     |           |     ||                    |      |     | 
-LL-EP-----D---NIN----GKT--CTAS-H--L-C---H-N-T--RC-HN--PL-HL
SEWRSLKVQWDEPSSVFRPERVSPWELEPLNLSDALCRELWHACAGPLVTLPREGERVYY
  | ||    |         |   |   | |     |    |  |   | | | |    |
C-WESL----DD--N--K-GR-N-WCPGP-N-G-G-C--V-H--A--VVCL-RQGP-L-Y
FPEGHMEQLEASMHQGLEQQMPSFNLPSKILCKVINIQRRAEPETDEVYAQITLLPELDQ
 | |      |    |  ||       |     |      |   |    |||  |   | 
GP-G------ATV-AG-PQQ--R-G--SH-F--V--V---A--LTN---AQI--LAVIDS
SEPTSPDAPVQEPEKCTVHSFCKTLTASDTSTHGGFSVLRRHADDCLPPLDMSQQPPWQE
 | |      | |   | |     |         |   |  |   |          |   
WEET---VG-QFP-VIT-H-HV-PL-GG--GLQ-G-T-L--H---C---YEI----P---
LVATDLHNSEWHFRHIFRGQPRRHLLTTGWSVFVSSKKLVAGDAFIFLRGENEELRVGVR
| |         |     | |     |  |      |        |     |    | | 
L-AAP-Y-GV-GFAK--NG-P-----TR-WQ-Y---KR-----T-I-----N-Q--V-VH
RHMRQQTNIPSSVISSHSMHIGVLATAAHAITTGTIFSVFYKPRTSRSEFIVSVNRYLEA
|     |  |           |   || |     |       |         |    |  
R-WGSHT-VP-FLLEPDNIN-GKTCTASH-LCHNT--RC-HNP-LHLC-W-ES----LD-
KTQKLSVGMRFKMRFEPEKRFSGTIVGVQENKSSVWHDSEWRSLKVQWDEPSSVFRP-ER
   |   | |      |     |   |       |      |           |  |  |
-DNK---G-R---NWCPGP--NG---GC-VH-AVV---C-LRQGPL-YGPGATVAGPQQR
VSPWELEPL
 |       
GSHF-V--V
4ldx 1a74  125  668  324  18.71
DALCRELWHACAGPLVTLPREGERVYYFPEGHMEQLEASMHQGLEQQMPSFNLPSKILCK
      |          | |      |  |   |  |     |          |   |  
----KDLVDT-T-EMY-L-R---TI-Y--E--LE--E----EG----V-T---P---L--
VINIQRRAEPETDEVYAQITLLPELDQSEPTSPDAPVQEPEKCTVHSFCKTLTASDTSTH
      ||        |    | |  |    |       |   || |   |  |      
------RA-----RI-AE-R-L-E--Q----S--G----P---TV-S--QTV-A------
GGFSVLRRHADDCLPPLDMSQQPPWQELVATDLHNSEWHFRHIFRGQPRRHLLTTGWSVF
       |          |       |    |             |      |     | 
-------R----------M-------E---RD-------------G------L-----V-
VSSKKLVAGDAFIFLRGENEELRVGVRRHMRQPSSVISSHSMHIGVLATAAHAITTGTIF
|     || |     |     |         |         |      |      ||   
V-----VASD-----R--S--L---------Q---------M------T-----PTG---
SVFYKPRTSRSEFIVSVNRYLEAKTQKLSVGMRFKMRFEGKRFSGTIVGVQENKSSVWHD
      ||            | | |    |     |     |           |    | 
------RT------------L-A-T---AV-----M-----R-----------K----H-
SEWRSLKVQWDEPSSVFRPERVSPWELEPLNLSDALCRELWHACAGPLVTLPREGERVYY
   | |             ||        | | |           | |         |  
---R-L--------A----ER--------L-LTD-I---I-----G-L-DI----NKV--
FPEGHMEQLEASMHQGLEQQMPSFNLPSKILCKVINIQRRAEPETDEVYAQITLLPELDQ
    |    ||                    |       |      |           | 
----H-D--EA--------------------C-------R----W-E-H--V--M-S-D-
SEPTSPDAPVQEPEKCTVHSFCKTLTASDTSTHGGFSVLRRHADDCLPPLDMSQQPPWQE
 |       | |     |    | |   |       |   |           |   |   
-E-------V-E-RR-LV----KVL--KD--V----S---R-----------S---P---
LVATDLHNSEWHFRHIFRGQPRRHLLTTGWSVFVSSKKLVAGDAFIFLRGENEELRVGVR
                | | |       |         |   |          ||  || 
----------------F-GNP----I-PG---------L---D----------EL--GV-
RHMRQQTNIPSSVISSHSMHIGVLATAAHAITTGTIFSVFYKPRTSRSEFIVSVNRYLEA
        |   |       |              || |     |    |          
--------I---V------QI-------N-----EIFQV--E--T--DQF----------
KTQKLSVGMRFKMRFEPEKRFSGTIVGVQENKSSVWHDSEWRSLKVQWDEPSSVFRPERV
 || |                      | |       |     |              | 
-TQ-L-------L----D---A-----V-E----LL-D-D---L-A---H--TI----RI
SPWELEPL
        
--------
4ldx 1c0w  105  668  173  15.72
DALCRELWHACAGPLVTLPREGERVYYFPEGHMEQLEASMHQGLEQQMPSFNLPSKILCK
|   | |         |  |  |      |       |  |  || |        | |  
DLVDR-L-N------TTF-RQMEQ-----E--L-AIFAA-H--LE-Q----H---KLL--
VINIQRRAEPETDEVYAQITLLPELDQSEPTSPDAPVQEPEKCTVHSFCKTLTASDTSTH
|      |      |      |||    |    |      |    |     |        
V------A-----RVF---S-LPEV-KKE----D------E----HN---PL-----N-R
GGFSVLRRHADDCLPPLDMSQQPPWQELVATDLHNSEWHFRHIFRGQPRRHLLTTGWSVF
    |   |    |   |       | | |  |     |||| |  |             
--IEV-KQH----LGN-D-A-----QSL-A--L---R-HFRHLFI-Q-QQ---SEN-R--
VSSKKLVAGDAFIFLRGENEELRVGVRRHMRQPSSVISSHSMHIGVLATAAHAITTGTIF
 || |  |  |    |     |          |  |          |   | |       
-SS-K--A--A-V--R-----L----------P-GVL-CYQVD-N-L-SQA-AL----V-
SVFYKPRTSRSEFIVSVNRYLEAKTQKLSVGMRFKMRFEGKRFSGTIVGVQENKSSVWHD
|            |   |  |  ||            ||       || | |  |     
S--H---------IQHINK-L--KT---T--------FE--H----IVTV-E--SEL-PT
SEWRSLKVQWDEPSSVFRPERVSPWELEPLNLSDALCRELWHACAGPLVTLPREGERVYY
   |     |     | |     |  |  ||    |   | |    |  ||     |   
AA-R-F--EW-----VHR--HL-P-GLITLNAYRTL-TVL-H---DP-ATL-----R---
FPEGHMEQLEASMHQGLEQQMPSFNLPSKILCKVINIQRRAEPETDEVYAQITLLPELDQ
|  |      |  |               |  |  |   |     ||| ||  |   |  
F--G-W----ANKH---------------II-K--NL-HR-----DEVLAQ--LEKSL-K
SEPTSPDAPVQEPEKCTVHSFCKTLTASDTSTHGGFSVLRRHADDCLPPLDMSQQPPWQE
| | |  ||    |        | |              |    |    |      | | 
S-PRSV-APWTR-EE-W-QR--K-L---E----------REY-QD-IAAL------P-QN
LVATDLHNSEWHFRHIFRGQPRRHLLTTGWSVFVSSKKLVAGDAFIFLRGENEELRVGVR
  |  |       |     ||        |       |   ||               | 
--A-KL-KIK---RPV-KVQP---IARV-W--Y----K---GD-------Q-KQ----V-
RHMRQQTNIPSSVISSHSMHIGVLATAAHAITTGTIFSVFYKPRTSRSEFIVSVNRYLEA
 |    |  |   |      |        |   |    |   |     |     | |  |
QH-ACPT--P--LI---AL-IN--RDNG-A---G----V---PDV--GE-L--LN-Y-DA
KTQKLSVGMRFKMRFEPEKRFSGTIVGVQENKSSVWHDSEWRSLKVQWDEPSSVFRPERV
      |  | |    |  |                |      |               |
--D--NVQHRYKPQAQP-LR----LI-I-P-R--L-H------L----------Y----V
SPWELEPL
        
A----D--
4ldx 1ecr  138  668  305  20.66
DALCRELWHACAGPLVTLPREGERVYYFPEGHMEQLEASMHQGLEQQMPSFNLPSKILCK
                      | |    |       |  |  ||              |
N----D-------D-I------E-V----ESDADK-RAH-HNALE----------R---K
VINIQRRAEPETDEVYAQITLLPELDQSEPTSPDAPVQEPEKCTVHSFCKTLTASDTSTH
     ||     |     |              |            ||           |
-----RR-----D--H--I---------K----D------------SF-----------H
GGFSVLRRHADDCLPPLDMSQQPPWQELVATDLHNSEWHFRHIFRGQPRRHLLTTGWSVF
   | | |  |    |   |            |             |        |    
---S-L-R--DS-V-P---S------------L-------------Q--------G----
VSSKKLVAGDAFIFLRGENEELRVGVRRHMRQPSSVISSHSMHIGVLATAAHAITTGTIF
    |     |           |        |           |  |             
---EK-----A-------S---R--A-----Q-----------I--L-------------
SVFYKPRTSRSEFIVSVNRYLEAKTQKLSVGMRFKMRFEGKRFSGTIVGVQENKSSVWHD
    |  |   | |     |           ||   |   |           |     | 
D---K-AT---EYI----QY-----------MR---R---K-----------N-HT--H-
SEWRSLKVQWDEPSSVFRPERVSPWELEPLNLSDALCRELWHACAGPLVTLPREGERVYY
          |         |         | |||                     |   
-Q-QD--I--DD---L-K--R------Q--N-SDA---D-------------K---R---
FPEGHMEQLEASMHQGLEQQMPSFNLPSKILCKVINIQRRAEPETDEVYAQITLLPELDQ
    |        |  ||              |     ||     |     |        
---AH--------HNALE----------R---K-----RR-----D--H--I--------
SEPTSPDAPVQEPEKCTVHSFCKTLTASDTSTHGGFSVLRRHADDCLPPLDMSQQPPWQE
      |            ||           |   | | |  |    |   |       
-K----D------------SF-----------H---S-L-R--DS-V-P---S-------
LVATDLHNSEWHFRHIFRGQPRRHLLTTGWSVFVSSKKLVAGDAFIFLRGENEELRVGVR
     |             |        |        |     |           |    
-----L-------------Q--------G-------EK-----A-------S---R--A-
RHMRQQTNIPSSVISSHSMHIGVLATAAHAITTGTIFSVFYKPRTSRSEFIVSVNRYLEA
     |              |  |                 |  |   | |     |   
-----Q--------------I--L-------------D---K-AT---EYI----QY---
KTQKLSVGMRFKMRFEPEKRFSGTIVGVQENKSSVWHDSEWRSLKVQWDEPSSVFRPERV
        ||   |    |           |     |           |         | 
--------MR---R----K-----------N-HT--H--Q-QD--I--DD---L-K--R-
SPWELEPL
        
---Q-N--
4ldx 1hlo   90  668  153  13.47
DALCRELWHACAGPLVTLPREGERVYYFPEGHMEQLEASMHQGLEQQMPSFNLPSKILCK
                                       |    |   |      |  | 
---------------------------------------M----E-K-P-Y----K--C-
VINIQRRAEPETDEVYAQITLLPELDQSEPTSPDAPVQEPEKCTVHSFCKTLTASDTSTH
                                       || |      |       |  
---------------------------------------PE-C---G--K-------S--
GGFSVLRRHADDCLPPLDMSQQPPWQELVATDLHNSEWHFRHIFRGQPRRHLLTTGWSVF
  |                                |          |             
--F--------------------------------S----------Q-------------
VSSKKLVAGDAFIFLRGENEELRVGVRRHMRQPSSVISSHSMHIGVLATAAHAITTGTIF
 ||               |  |      |  |                |  |   ||   
-SS---------------N--L----QKH--Q----------R-----T--H---TG---
SVFYKPRTSRSEFIVSVNRYLEAKTQKLSVGMRFKMRFEGKRFSGTIVGVQENKSSVWHD
    ||             |   |      |   |       ||      |   ||   |
E---KP-------------Y---KCPE--CG---K-----S-FS------Q---SS---D
SEWRSLKVQWDEPSSVFRPERVSPWELEPLNLSDALCRELWHACAGPLVTLPREGERVYY
     |  |                                |              |   
-----L--Q----------------------------K---H-------------QRT--
FPEGHMEQLEASMHQGLEQQMPSFNLPSKILCKVINIQRRAEPETDEVYAQITLLPELDQ
    |          | |   |      |  |                            
----H------T---G-E-K-P-Y----K--C----------------------------
SEPTSPDAPVQEPEKCTVHSFCKTLTASDTSTHGGFSVLRRHADDCLPPLDMSQQPPWQE
            || |      |       |    ||   |           |       
------------PE-C---G--K-------S----FS---R-----------S-------
LVATDLHNSEWHFRHIFRGQPRRHLLTTGWSVFVSSKKLVAGDAFIFLRGENEELRVGVR
    |                  | |         |                        
----D------------------H-L---------S------------------------
RHMRQQTNIPSSVISSHSMHIGVLATAAHAITTGTIFSVFYKPRTSRSEFIVSVNRYLEA
   |                        |                               
---R------------------------H-------------------------------
KTQKLSVGMRFKMRFEPEKRFSGTIVGVQENKSSVWHDSEWRSLKVQWDEPSSVFRPERV
  |                |   |            |         |             
--Q----------------R---T------------H---------Q-------------
SPWELEPL
        
--------
4ldx 1mey   65  668   84   9.73
DALCRELWHACAGPLVTLPREGERVYYFPEGHMEQLEASMHQGLEQQMPSFNLPSKILCK
           |           |              | |          |   |    
-TI-KDV----A-------K---R------ANVSTTTVS-H--V---I---N---K--TR
VINIQRRAEPET-DEVYAQITLLPELDQSEPTSPDAPVQEPEKCTVHSFCKTLTASDTST
       || ||   | | |    ||  | | |  | |    |   |   |      || 
-F-V---AE-ETRNAVWAAI---KELHYS-P-S--A-VARSLKVN-HT--KSIGLLATSS
HGGFSVLRRHADDCLPPLDMSQQPPWQELVATDLHNSEWHFRHIFRGQPRRHLLTTGWSV
                     |      |    | |  |        | |   |    | 
EAAY--F-AEIIEAVEK-NCFQK-GY-TLI---LGNA-WN--NLEK-Q-RAY-L----SM
FVSSKKLVAGDAFIFLRGENEELRVGVRRHMRQPSSVISSHSMHIGVLATAAHAITTGTI
    |  |  |    |      | |        |        |    |    | |     
-MAQKR-V--DG---L------L-VMCSEY-PEP--LL---AM----LEEYRH-IPM-VV
FSVFYKPRTSRSEFIVSVNRYLEAKTQKLSVGMRFKMRFEGKRFSGTIVGVQENKSSVWH
                  |   |        |    |   | |         |      |
MD-WGEAKADFTDAVID-NAF-E------G-G--Y-M--AG-RY---L--I-E-R-G--H
DSEWRSLKVQWDEPSSVFRPERVSPWELEPLNLSDALCRELWHACAGPLVTLPREGERVY
    |           |  |    |  ||  |   |  | |    |         |    
----R--EI------GVI-P---GP--LE-RN-TGA-GR-L----A---------G----
YFPEGHMEQLEASMHQGLEQQMPSFNLPSKILCKVINIQRRAEPETDEVYAQITLLPELD
 |    ||  || |        |     |      |  |   |||    |          
-FMKA-ME--EA-M---I--KVP--E--S---W--I-VQGDFEPESG--Y-R-A-M-Q--
QSEPTSPDAPVQEPEKCTVHSFCKTLTASDTSTHGGFSVLRRHADDCLPPLDMSQQPPWQ
|    |   |   |   |   ||           ||       |        |       
QI--LS-Q-P-HRP---TA-VFC-----------GG-DIM---A--------MG------
ELVATDLHNSEWHFRHIFRGQPRRHLLTTGWSVFVSSKKLVAGDAFIFLRGENEELRVGV
 | | |    |   |      |            | |  |  |         |   |   
ALCAAD----EMGLR-V----P-Q-------D--V-S--LI-G----Y---DN--VR-NA
RRHMRQQTNIPSSVISSHSMHIGVLATAAHAITTGTIFSVFYKPRTSRSEFIVSVNRYLE
 |     |  |                   |  | ||      |  |  |     |  | 
-RYF---T--P-------------------AL-T-TI----HQPKDSLGE--TAFNMLLD
AKTQKLSVGMRFKMRFEPEKRFSGTIVGVQENKSSVWHDSEWRSLKVQWDEPSSVFRPER
       |    | | ||    |  |    |    | |    | |     |  ||     
----RI-V--N-K-REEPQ---S--I----E----V-H--P-R-L-I---ERRSV--AD-
VSPWELEPL
  |      
-GPFR-DYR
4ldx 1pnr  130  668  338  19.46
-DA-LC--RE----L---W----H-A---------C----A--G--PL--VT---LPR--
     |            |    |           |       |   |   |   |    
MKRYICSFADCGAAYNKNWKLQAHLSKHTGEKPFPCKEEGCEKGFTSLHHLTRHSLTHTG
E--------G-E-R------V------Y-------Y---FPE-G-----------HM---
|        |   |                     |   |   |           |    
EKNFTCDSDGCDLRFTTKANMKKHFNRFHNIKMKRYICSFADCGAAYNKNWKLQAHLSKH
---------EQ-LE----A-------SM-H--Q--------G--LE---Q-QM-P--S-F
         |   |            |  |           |  |       |      |
TGEKPFPCKEEGCEKGFTSLHHLTRHSLTHTGEKNFTCDSDGCDLRFTTKANMKKHFNRF
-NLPSK--I--L--C-KVI--N--IQ----RR-AE---P--ETD-EV-Y-A--QIT---L
 |   |  |     |      |   |        |   |  |   |         |   |
HNIKMKRYICSFADCGAAYNKNWKLQAHLSKHTGEKPFPCKEEGCEKGFTSLHHLTRHSL
L-P-E--L--D-QS-E---PT---------------------S-PD---A-----PVQ--
    |     |         |                     |  |   |       |  
THTGEKNFTCDSDGCDLRFTTKANMKKHFNRFHNIKMKRYICSFADCGAAYNKNWKLQAH
------E---P--EK-C----T----V--HSF--C--KTLTA-S---D----T-ST---H
      |   |  |  |    |       ||      |  |  |   |    |      |
LSKHTGEKPFPCKEEGCEKGFTSLHHLTRHSLTHTGEKNFTCDSDGCDLRFTTKANMKKH
-GGF-SV-LRRH-AD--DC---L-P--PLD--MS----QQP-PW--Q--E--LVA----T
   |      |      ||         |    |      | |      |         |
FNRFHNIKMKRYICSFADCGAAYNKNWKLQAHLSKHTGEKPFPCKEEGCEKGFTSLHHLT
--DL-H----N----S---E--W--------HF-R-H-------I--F------------
   | |    |    |               || | |       |  |            
RHSLTHTGEKNFTCDSDGCDLRFTTKANMKKHFNRFHNIKMKRYICSFADCGAAYNKNWK
------R--GQ---P-R-----R------HL----LT-TG---W---S----V-F-V-SS
         |    |              ||    || ||       |      |     
LQAHLSKHTGEKPFPCKEEGCEKGFTSLHHLTRHSLTHTGEKNFTCDSDGCDLRFTTKAN
--K--------KL---V---A--G-----D----A----------F------I---F---
  |        |        |  |          |          |          |   
MKKHFNRFHNIKMKRYICSFADCGAAYNKNWKLQAHLSKHTGEKPFPCKEEGCEKGFTSL
--L-R------GE-N-----E--ELR----VGV-R---R-H---M-RQ-PS-----SV--
  | |      || |         ||            | |   | |   |         
HHLTRHSLTHTGEKNFTCDSDGCDLRFTTKANMKKHFNRFHNIKMKRYICSFADCGAAYN
----ISSH-SMH-----I-----GV-LA-TA----A-HAIT-TG----T-------I---
       | | |           |     |       |  | ||    |           
KNWKLQAHLSKHTGEKPFPCKEEGCEKGFTSLHHLTRHSLTHTGEKNFTCDSDGCDLRFT
-----------F-S------V--F------Y----------------K--P-------R-
           |           |      |                |  |         
TKANMKKHFNRFHNIKMKRYICSFADCGAAYNKNWKLQAHLSKHTGEKPFPCKEEGCEKG
-TS-----R-S-----E--F--------I-----VSV--------N----RYL----E--
 ||     | |     |  |                         |    ||        
FTSLHHLTRHSLTHTGEKNFTCDSDGCDLRFTTKANMKKHFNRFHNIKMKRYICSFADCG
-A--KT---Q-KLS--VGMR-F--------K-------M-R--F-E-G-KRF---S-G--
 |  |    |  ||   |   |        |         |      | | |   | |  
AAYNKNWKLQAHLSKHTGEKPFPCKEEGCEKGFTSLHHLTRHSLTHTGEKNFTCDSDGCD
---TI-VGVQE------N---K----S-----SV----W--------H----------DS
   |             |   |    |           |        |            
LRFTTKANMKKHFNRFHNIKMKRYICSFADCGAAYNKNWKLQAHLSKHTGEKPFPCKEEG
-E--W-------R-SL-----K--V-QWD--E-----PSSV---F-R----P-ER-V-S-
 |          | ||     |      |               | |       |   | 
CEKGFTSLHHLTRHSLTHTGEKNFTCDSDGCDLRFTTKANMKKHFNRFHNIKMKRYICSF
--------P-WELEP-L--NLSD-AL-CR----E--------LW-HA----------C-A
          | |   |          |     |        |  |           |  
ADCGAAYNKNWKLQAHLSKHTGEKPFPCKEEGCEKGFTSLHHLTRHSLTHTGEKNFTCDS
-G-PL--VT---L-P---R-EG---ER-V--Y------Y------------------FP-
 |  |   |         |       |           |                  || 
DGCDLRFTTKANMKKHFNRFHNIKMKRYICSFADCGAAYNKNWKLQAHLSKHTGEKPFPC
--EG-H-----MEQL-EASM-H--Q--------G--LE---Q-QM-P--S-F-NLPSK--
  ||          |   |  |           |  |       |      | |   |  
KEEGCEKGFTSLHHLTRHSLTHTGEKNFTCDSDGCDLRFTTKANMKKHFNRFHNIKMKRY
I--L--C-KVI--N--IQ----RR-AE---P--ETD-EV-Y-A--QIT---LL-P-E--L
|     |      |   |        |   |  |   |         |   |    |   
ICSFADCGAAYNKNWKLQAHLSKHTGEKPFPCKEEGCEKGFTSLHHLTRHSLTHTGEKNF
--D-QS-E---PT---------------------S-PD---A-----PVQ--------E-
  |         |                     |  |   |       |        | 
TCDSDGCDLRFTTKANMKKHFNRFHNIKMKRYICSFADCGAAYNKNWKLQAHLSKHTGEK
--P--EK-C----T----V--HSF--C--KTLTA-S---D----T-ST---H-GGF-SV-
  |  |  |    |       ||      |  |  |   |    |      |   |    
PFPCKEEGCEKGFTSLHHLTRHSLTHTGEKNFTCDSDGCDLRFTTKANMKKHFNRFHNIK
LRRH-AD--DC---L-P--PLD--MS----QQP-PW--Q--E--LVA----T--DL-H--
  |      ||         |    |      | |      |         |   | |  
MKRYICSFADCGAAYNKNWKLQAHLSKHTGEKPFPCKEEGCEKGFTSLHHLTRHSLTHTG
--N----S---E--W--------HF-R-H-------I--F------------------R-
  |    |               || | |       |  |                    
EKNFTCDSDGCDLRFTTKANMKKHFNRFHNIKMKRYICSFADCGAAYNKNWKLQAHLSKH
-GQ---P-R-----R------HL----LT-TG---W---S----V-F-V-SS--K-----
 |    |              ||    || ||       |      |       |     
TGEKPFPCKEEGCEKGFTSLHHLTRHSLTHTGEKNFTCDSDGCDLRFTTKANMKKHFNRF
---KL---V---A--G-----D----A----------F------I---F-----L-R---
   |        |  |          |          |          |     | |   
HNIKMKRYICSFADCGAAYNKNWKLQAHLSKHTGEKPFPCKEEGCEKGFTSLHHLTRHSL
---GE-N-----E--ELR----VGV-R---R-H---M-R------------------Q--
   || |         ||            | |   | |                  |  
THTGEKNFTCDSDGCDLRFTTKANMKKHFNRFHNIKMKRYICSFADCGAAYNKNWKLQAH
--Q-T--N-IP----------SSV--ISSHSM-H-----I-----GV-L--AT-A-----
    |     |           |      ||  |           |  |   | |     
LSKHTGEKPFPCKEEGCEKGFTSLHHLTRHSLTHTGEKNFTCDSDGCDLRFTTKANMKKH
--A-H-----A-I-T-T--GTIF--S--V---F--Y---K--P-------R--TS-----
    |       |      |                   |  |          ||     
FNRFHNIKMKRYICSFADCGAAYNKNWKLQAHLSKHTGEKPFPCKEEGCEKGFTSLHHLT
R-S-----E--F--------I-----VSV--------N----RYL----E---A--KT--
| |     |  |                         |    ||         |  |   
RHSLTHTGEKNFTCDSDGCDLRFTTKANMKKHFNRFHNIKMKRYICSFADCGAAYNKNWK
-Q-KLS--VGMR-F--------K-------M-R--F-EP-EKRF---S-G-----TI-VG
 |  ||   |   |        |         |       || |   | |     |    
LQAHLSKHTGEKPFPCKEEGCEKGFTSLHHLTRHSLTHTGEKNFTCDSDGCDLRFTTKAN
VQE------N-K-SS-V--WHD-----SE-WR--S-L-K-V-Q--W----D--EP--SSV
         | |         |        |     | |              |    | 
MKKHFNRFHNIKMKRYICSFADCGAAYNKNWKLQAHLSKHTGEKPFPCKEEGCEKGFTSL
--F-R-----P-ER--V--S---P--W--E--LEP-------L-
    |       |      |                        
HHLTRHSLTHTGEKNFTCDSDGCDLRFTTKANMKKHFNRFHNIK
4ldx 1tf3  314  668 2024  15.51
DALCRELWHACAGPLVTLPREGERVYYFPEGHMEQLEASMHQGLEQQMPSFNLPSKILCK
    |             |       |          |                    | 
----R-------------P-------Y----------A--------------------C-
VINIQRRAEPETDEVYAQITLLPELDQSEPTSPDAPVQEPEKCTVHSFCKTLTASDTSTH
                                   ||   |     | |      |    
-----------------------------------PV---E-----S-C------D----
GGFSVLRRHADDCLPPLDMSQQPPWQELVATDLHNSEWHFRHIFRGQPRRHLLTTGWSVF
       |                                |  |     |          
-------R--------------------------------R--F--S--R----------
VSSKKLVAGDAFIFLRGENEELRVGVRRHMRQPSSVISSHSMHIGVLATAAHAITTGTIF
  |      |          ||     || |            |       |        
--S------D----------EL---T-RHIR------------I-------H--------
SVFYKPRTSRSEFIVSVNRYLEAKTQKLSVGMRFKMRFEGKRFSGTIVGVQENKSSVWHD
                                             |  | |         
---------------------------------------------T--G-Q---------
SEWRSLKVQWDEPSSVFRPERVSPWELEPLNLSDALCRELWHACAGPLVTLPREGERVYY
      |     |   |                   ||     |            |   
------K-----P---F----------Q--------CR-I---C------M-----R---
FPEGHMEQLEASMHQGLEQQMPSFNLPSKILCKVINIQRRAEPETDEVYAQITLLPELDQ
                       |   |           |                    
----------------------NF---S-----------R--------------------
SEPTSPDAPVQEPEKCTVHSFCKTLTASDTSTHGGFSVLRRHADDCLPPLDMSQQPPWQE
    | |           |     |    | ||       |                   
----S-D-----------H-----L----T-TH----I--R-------------------
LVATDLHNSEWHFRHIFRGQPRRHLLTTGWSVFVSSKKLVAGDAFIFLRGENEELRVGVR
   |  |  |          |           |       | |  |           |  
---T--HTGE-------K--P-----------F-------ACD--I----------CG--
RHMRQQTNIPSSVISSHSMHIGVLATAAHAITTGTIFSVFYKPRTSRSEFIVSVNRYLEA
|                                      |      ||          | 
R--K-----------------------------------F-----ARSD---------E-
KTQKLSVGMRFKMRFEPEKRFSGTIVGVQENKSSVWHDSEWRSLKVQWDEPSSVFRPERV
         | | |         |       |    |      |              | 
---------R-K-R-----H---T-------K--I-H------L--------------R-
SPWELEPL
        
--------
4ldx 1aay   67  668   85  10.03
DALCRELWHACAGPLVTLPREGERVYYFPEGHMEQLEASMHQGLEQQMPSFNLPSKILCK
            |           |   |     ||     |         ||     ||
-----------SG--I--------V---P-----QL-----QNI---VSTVNL-G---CK
VINIQRRAEPETDEVYAQITLLPELDQSEPTSPDAPVQEPEKCTVHSFCKTLTASDTSTH
           |    |       |         |    | |     |     |      
-LDL--K----T--I-A-------L-RAR----NAE-YNP-K---R-F-----A------
GGFSVLRRHADDCLPPLDMSQQPPWQELVATDLHNSEWHFRHIFRGQPRRHLLTTGWSVF
         |        |                     | | |  | |   ||    |
---------A---V--I-M---------------------R-I-R-EP-R---TTA-LIF
VSSKKLVAGDAFIFLRGENEELRVGVRRHMRQPSSVISSHSMHIGVLATAAHAITTGTIF
 || | |   |        ||                   |     |  ||         
-SSGKMVCTGA----K--SEE------------------NS-R---L--AAR--------
SVFYKPRTSRSEFIVSVNRYLEAKTQKLSVGMRFKMRFEGKRFSGTIVGVQENKSSVWHD
   |     |    | |        |||  |      |  | |                |
K--Y----AR----V-V--------QKL--G------FPAK-F---L------------D
SEWRSLKVQWDEPSSVFRPERVSPWELEPLNLSDALCRELWHACAGPLVTLPREGERVYY
      | |            |          |   |           |           
--F---KIQ-----NM-----V--------G-S---C-D---------V-------K---
FPEGHMEQLEASMHQGLEQQMPSFNLPSKILCKVINIQRRAEPETDEVYAQITLLPELDQ
||      ||     |         |    |             |     |         
FP---I-RLE-----G---------L---VL-------------T---H-Q-----QF--
SEPTSPDAPVQEPEKCTVHSFCKTLTASDTSTHGGFSVLRRHADDCLPPLDMSQQPPWQE
|   |      |||          |          |            |           
S---S-----YEPE----------L----------F------------P---G-------
LVATDLHNSEWHFRHIFRGQPRRHLLTTGWSVFVSSKKLVAGDAFIFLRGENEELRVGVR
|            | |    | |          |    |      ||          |  
LI----------YRMI-K--P-R--------I-V----LL-----IFV---S-----G--
RHMRQQTNIPSSVISSHSMHIGVLATAAHAITTGTIFSVFYKPRTSRSEFIVSVNRYLEA
            |         ||        ||       |    | | |     | ||
---K--------V---------VL--------TG---A---K--V-RAE-I-----Y-EA
KTQKLSVGMRFKMRFEPEKRFSGTIVGVQENKSSVWHDSEWRSLKVQWDEPSSVFRPERV
                    |        ||            ||         ||    
--------------------F--------EN---I-Y--P--ILK-------G-FR--K-
SPWELEPL
        
--------
4ldx 1cdw  103  668  179  15.42
DALCRELWHACAGPLVTLPREGERVYYFPEGHMEQLEASMHQGLEQQMPSFNLPSKILCK
    |      ||   |       |                                 | 
-K--R------AG---T-------V---------------------------------CS
VINIQRRAEPETDEVYAQITLLPELDQSEPTSPDAPVQEPEKCTVHSFCKTLTASDTSTH
  |                                             |   | | | | 
--N---------------------------------------------CQ--T-S-T-T-
GGFSVLRRHADDCLPPLDMSQQPPWQELVATDLHNSEWHFRHIFRGQPRRHLLTTGWSVF
                              |                     |   |   
------------------------------T---------------------L---W---
VSSKKLVAGDAFIFLRGENEELRVGVRRHMRQPSSVISSHSMHIGVLATAAHAITTGTIF
                           |  |                             
---------------------------R--R-----------------------------
SVFYKPRTSRSEFIVSVNRYLEAKTQKLSVGMRFKMRFEGKRFSGTIVGVQENKSSVWHD
|    |                             |            |           
S----P-----------------------------M------------G-----------
SEWRSLKVQWDEPSSVFRPERVSPWELEPLNLSDALCRELWHACAGPLVTLPREGERVYY
          |       |  |              |     || |    |       ||
----------D-------P--V--------------C----NAC-G----L-------YY
FPEGHMEQLEASMHQGLEQQMPSFNLPSKILCKVINIQRRAEPETDEVYAQITLLPELDQ
        |    |     |             | |   |                    
-------KL----H-----Q-------------V-N---R--------------------
SEPTSPDAPVQEPEKCTVHSFCKTLTASDTSTHGGFSVLRRHADDCLPPLDMSQQPPWQE
            |           |      |                   |        
------------P-----------L------T-------------------M--------
LVATDLHNSEWHFRHIFRGQPRRHLLTTGWSVFVSSKKLVAGDAFIFLRGENEELRVGVR
                      |              |    |              |  
----------------------R--------------K----D--------------GI-
RHMRQQTNIPSSVISSHSMHIGVLATAAHAITTGTIFSVFYKPRTSRSEFIVSVNRYLEA
     |                                                      
-----Q------------------------------------------------------
KTQKLSVGMRFKMRFEPEKRFSGTIVGVQENKSSVWHDSEWRSLKVQWDEPSSVFRPERV
 |                 |          |          |  ||      |       
-T-----------------R----------N----------R--KV------S-------
SPWELEPL
|       
S-------
4ldx 1gat   54  668   60   8.08
DALCRELWHACAGPLVTLPREGERVYYFPEGHMEQLEASMHQGLEQQMPSFNLPSKILCK
|   |          |       |    |                  |            
D---R----------V---K---R----P------------------M------------
VINIQRRAEPETDEVYAQITLLPELDQSEPTSPDAPVQEPEKCTVHSFCKTLTASDTSTH
  |                               |            |            
--N-------------------------------A------------F---I--------
GGFSVLRRHADDCLPPLDMSQQPPWQELVATDLHNSEWHFRHIFRGQPRRHLLTTGWSVF
    |                   |          |        | | ||          
----V-------------------W----------S--------RDQ-RR----------
VSSKKLVAGDAFIFLRGENEELRVGVRRHMRQPSSVISSHSMHIGVLATAAHAITTGTIF
    |     |   |  ||             |        |                  
----KM----A---L--EN-------------P------R-M------------------
SVFYKPRTSRSEFIVSVNRYLEAKTQKLSVGMRFKMRFEGKRFSGTIVGVQENKSSVWHD
      |   || | |       | | |           |          |         
------R-N-SE-I-S-------K-Q-L-----------G--Y-------Q---------
SEWRSLKVQWDEPSSVFRPERVSPWELEPLNLSDALCRELWHACAGPLVTLPREGERVYY
  |   |                                        | |          
--W---K--------------------------------M-------L-T----------
FPEGHMEQLEASMHQGLEQQMPSFNLPSKILCKVINIQRRAEPETDEVYAQITLLPELDQ
         ||      |              |                           
---------EA------E--------------K---------------W-----------
SEPTSPDAPVQEPEKCTVHSFCKTLTASDTSTHGGFSVLRRHADDCLPPLDMSQQPPWQE
            |       |              |                      ||
------------P-------F--------------F----------------------QE
LVATDLHNSEWHFRHIFRGQPRRHLLTTGWSVFVSSKKLVAGDAFIFLRGENEELRVGVR
  |                |                 |                |     
--A----------------Q-----------------K----------------L-----
RHMRQQTNIPSSVISSHSMHIGVLATAAHAITTGTIFSVFYKPRTSRSEFIVSVNRYLEA
     |            |         |                 | |       |   
-----Q-----------AM---------H-----------------R-E------KY---
KTQKLSVGMRFKMRFEPEKRFSGTIVGVQENKSSVWHDSEWRSLKVQWDEPSSVFRPERV
                |             |             |             | 
----------------P-------------N---------Y---K---------Y---R-
SPWELEPL
        
--------
4ldx 1hry   60  668   73   8.98
DALCRELWHACAGPLVTLPREGERVYYFPEGHMEQLEASMHQGLEQQMPSFNLPSKILCK
             | |       |           |      |            |   |
-------------PIV---K---R-----------L---L--G-------W----K---K
VINIQRRAEPETDEVYAQITLLPELDQSEPTSPDAPVQEPEKCTVHSFCKTLTASDTSTH
                            |        |                      
---------------------------GE--------Q---------------------N
GGFSVLRRHADDCLPPLDMSQQPPWQELVATDLHNSEWHFRHIFRGQPRRHLLTTGWSVF
 |                       ||         |                   |   
-G-----------------------QE---------E------------K------W---
VSSKKLVAGDAFIFLRGENEELRVGVRRHMRQPSSVISSHSMHIGVLATAAHAITTGTIF
                    |                               |       
----------C---------E---------K---------------------A-------
SVFYKPRTSRSEFIVSVNRYLEAKTQKLSVGMRFKMRFEGKRFSGTIVGVQENKSSVWHD
 |  |     |     |      |  ||      |     |    |  | |         
-V--K-----S--L--V------K--KL------K-----K----T--G-Q---------
SEWRSLKVQWDEPSSVFRPERVSPWELEPLNLSDALCRELWHACAGPLVTLPREGERVYY
     |    |              |||                |    |          
-----L----D--------------ELE---------K------A---IT----------
FPEGHMEQLEASMHQGLEQQMPSFNLPSKILCKVINIQRRAEPETDEVYAQITLLPELDQ
                  |     |   |  |    |       |      |        
-----------T------QNV---N--TK--C----I-------T------I--------
SEPTSPDAPVQEPEKCTVHSFCKTLTASDTSTHGGFSVLRRHADDCLPPLDMSQQPPWQE
            |      |    |   |     |     |        |        | 
------------P-R----S----L---D-----G-----R--------L--------Q-
LVATDLHNSEWHFRHIFRGQPRRHLLTTGWSVFVSSKKLVAGDAFIFLRGENEELRVGVR
 |      |  | |    | |  |               |     |  |     |     
-V------S--H-R---KGLP--H---------------V-----IYCR-----L-----
RHMRQQTNIPSSVISSHSMHIGVLATAAHAITTGTIFSVFYKPRTSRSEFIVSVNRYLEA
   |     |      || |        |              |    |          |
--WR--W--P-D-L--HS-H--------H--------EL----R-A-ME-L--C-EF--A
KTQKLSVGMRFKMRFEPEKRFSGTIVGVQENKSSVWHDSEWRSLKVQWDEPSSVFRPERV
        |  |     |         |  |     |         |           ||
----FN--M--K-K-D-E------VC-V--N--P-YH---Y-----Q-----------RV
SPWELEPL
     |  
-----E-T
4ldx 1mhd   80  668  123  11.98
DALCRELWHACAGPLVTLPREGERVYYFPEGHMEQLEASMHQGLEQQMPSFNLPSKILCK
                       |  |                   |   | |    |  
----K----------I-------RL-Y-------------------Q---F-L----L--
VINIQRRAEPETDEVYAQITLLPELDQSEPTSPDAPVQEPEKCTVHSFCKTLTASDTSTH
            |        |  |                                |  
------------D--------L--L------------------------R-------S--
GGFSVLRRHADDCLPPLDMSQQPPWQELVATDLHNSEWHFRHIFRGQPRRHLLTTGWSVF
 |         |     | |                 |                  |   
-G---------D-M-K-D-S--------I--------W------------------W---
VSSKKLVAGDAFIFLRGENEELRVGVRRHMRQPSSVISSHSMHIGVLATAAHAITTGTIF
|   |    |                                              |   
V-D-K----D--------------------K-------------------------G---
SVFYKPRTSRSEFIVSVNRYLEAKTQKLSVGMRFKMRFEGKRFSGTIVGVQENKSSVWHD
       |    |            |                ||         |    | 
-------T----F------------Q----------------FS--------SK----H-
SEWRSLKVQWDEPSSVFRPERVSPWELEPLNLSDALCRELWHACAGPLVTLPREGERVYY
      |            |           |  |      |              |   
------K------------E--A--------L--A------H--------------R--W
FPEGHMEQLEASMHQGLEQQMPSFNLPSKILCKVINIQRRAEPETDEVYAQITLLPELDQ
   |   |       |        |   |   |           |   |           
---G-I-Q------KG--------N--RK---K---M-------T---Y-----------
SEPTSPDAPVQEPEKCTVHSFCKTLTASDTSTHGGFSVLRRHADDCLPPLDMSQQPPWQE
             |        |   |             | |      |          
-------------E--------K-M-A-------------R-A------L--------R-
LVATDLHNSEWHFRHIFRGQPRRHLLTTGWSVFVSSKKLVAGDAFIFLRGENEELRVGVR
       |          |        ||    |  ||                    | 
-------N--------Y-G---K----TG-E--V--KK--------------------VK
RHMRQQTNIPSSVISSHSMHIGVLATAAHAITTGTIFSVFYKPRTSRSEFIVSVNRYLEA
                       |                    |           |   
K--K-------------------L--------------------T-----------Y---
KTQKLSVGMRFKMRFEPEKRFSGTIVGVQENKSSVWHDSEWRSLKVQWDEPSSVFRPERV
  |                 ||    |                              | |
--Q-----------------FS----G------------------------------E-V
SPWELEPL
       |
-------L
4ldx 1pue   65  668   89   9.73
DALCRELWHACAGPLVTLPREGERVYYFPEGHMEQLEASMHQGLEQQMPSFNLPSKILCK
         | |        | ||       |  | |      |      |      | |
-S---P-YSA-A--M-A---E-ER-------H--Q-E--W---L--R---F-V-D-LL-K
VINIQRRAEPETDEVYAQITLLPELDQSEPTSPDAPVQEPEKCTVHSFCKTLTASDTSTH
  |    |    |       ||  |     | ||    | |          |      | 
--N----AY-QND-LH--LPLL-NL-ML--T-PD----ERE-----A----L-----GTR
GGFSVLRRHADDCLPPLDMSQQPPWQELVATDLHNSEWHFRHIFRGQPRRHLLTTGWSVF
    |  |                  ||    |           ||              
----V--R--------I-V------EEL----L-----------RGE-----M-------
VSSKKLVAGDAFIFLRGENEELRVGVRRHMRQPSSVISSHSMHIGVLATAAHAITTGTIF
  |           |   | ||  |                   |       |    || 
--SQR----E----LK--N-EL--G---------------A---GI------A----TI-
SVFYKPRTSRSEFIVSVNRYLEAKTQKLSVGMRFKMRFEGKRFSGTIVGVQENKSSVWHD
       | |     | |          |           |               |   
-------T-RG----S-N----------S------L----K--A----------APV---
SEWRSLKVQWDEPSSVFRPERVSPWELEPLNLSDALCRELWHACAGPLVTLPREGERVYY
 |   |  ||         | |    |  |  |||         |        | ||   
-E---LR-QW-----L---EEV----L--LK-SDA----M----A--------E-ER---
FPEGHMEQLEASMHQGLEQQMPSFNLPSKILCKVINIQRRAEPETDEVYAQITLLPELDQ
    |  | |      |      |      | |  |    |       |          |
----H--Q-E--W---L--R---F-V-D-LL-K--N----A-------Y----------Q
SEPTSPDAPVQEPEKCTVHSFCKTLTASDTSTHGGFSVLRRHADDCLPPLDMSQQPPWQE
      |           |     |             |       | | |        |
----N-D----------LH-----L-----------PLL--NL--MLTP-D---E---RE
LVATDLHNSEWHFRHIFRGQPRRHLLTTGWSVFVSSKKLVAGDAFIFLRGENEELRVGVR
  |  |       |        |          |    |        |||   |      
--A--L-GT----R-V------R--------I-V--EEL--------LRG---EM--S-Q
RHMRQQTNIPSSVISSHSMHIGVLATAAHAITTGTIFSVFYKPRTSRSEFIVSVNRYLEA
|      |             |     |  |   ||        | |     | |     
RELK---N-----------ELG-----A-GI--ATI--------T-RG----S-N-----
KTQKLSVGMRFKMRFEPEKRFSGTIVGVQENKSSVWHDSEWRSLKVQWDEPSSVFRPERV
     |     |    |          | |          |  |     |   |      
-----S--L--K-A-AP----------V-E----L-R--QW--L----EE---VL--LK-
SPWELEPL
|       
S----D--
4ldx 1tro  114  668  203  17.07
DALCRELWHACAGPLVTLPREGERVYYFPEGHMEQLEASMHQGLEQQMPSFNLPSKILCK
               |        |  |              | |              |
--------------MV-------KV-KF--------K---YKG-E-E------------K
VINIQRRAEPETDEVYAQITLLPELDQSEPTSPDAPVQEPEKCTVHSFCKTLTASDTSTH
             ||          |    ||         |       |          
-------------EV----------D----TS---------K--I----K----------
GGFSVLRRHADDCLPPLDMSQQPPWQELVATDLHNSEWHFRHIFRGQPRRHLLTTGWSVF
                            |        |  |              |    
-------K--------------------V--------W--R-V------------G----
VSSKKLVAGDAFIFLRGENEELRVGVRRHMRQPSSVISSHSMHIGVLATAAHAITTGTIF
    |                                    |   |              
----K------------------------------------M---V--------------
SVFYKPRTSRSEFIVSVNRYLEAKTQKLSVGMRFKMRFEGKRFSGTIVGVQENKSSVWHD
| |    |           |                                       |
S-F----T-----------Y---------------------------------------D
SEWRSLKVQWDEPSSVFRPERVSPWELEPLNLSDALCRELWHACAGPLVTLPREGERVYY
          |                   |              |   |    | |   
----------D-------------------N--------------GK--T----G-R---
FPEGHMEQLEASMHQGLEQQMPSFNLPSKILCKVINIQRRAEPETDEVYAQITLLPELDQ
               |                        |      |            
---------------G------------------------A------V------------
SEPTSPDAPVQEPEKCTVHSFCKTLTASDTSTHGGFSVLRRHADDCLPPLDMSQQPPWQE
    |        |        |     |             |             |   
----S--------E--------K-----D-------------A-------------P--K
LVATDLHNSEWHFRHIFRGQPRRHLLTTGWSVFVSSKKLVAGDAFIFLRGENEELRVGVR
         |               |            |   |                 
---------E---------------L------------L---D-----------------
RHMRQQTNIPSSVISSHSMHIGVLATAAHAITTGTIFSVFYKPRTSRSEFIVSVNRYLEA
                  |    |     |                         |   |
------------------M----L-----A-------------------------R---A
KTQKLSVGMRFKMRFEPEKRFSGTIVGVQENKSSVWHDSEWRSLKVQWDEPSSVFRPERV
                 | |         | |            |               
-----------------E-R---------E-K------------K---------------
SPWELEPL
        
--------
4ldx 1azq   54  668   66   8.08
DALCRELWHACAGPLVTLPREGERVYYFPEGHMEQLEASMHQGLEQQMPSFNLPSKILCK
    |   |             |               |   ||        |       
-S--R---H-------------EK--------------SL--GL--------L-T-----
VINIQRRAEPETDEVYAQITLLPELDQSEPTSPDAPVQEPEKCTVHSFCKTLTASDTSTH
           |         |  | | |     |              |     |    
-----------T-K-F--VS-L--L-Q-E-----A--------------K-----D----
GGFSVLRRHADDCLPPLDMSQQPPWQELVATDLHNSEWHFRHIFRGQPRRHLLTTGWSVF
 |  ||     |    |          | | |                      |     
-G--VL-----D----L---------KL-AAD----------------------T-----
VSSKKLVAGDAFIFLRGENEELRVGVRRHMRQPSSVISSHSMHIGVLATAAHAITTGTIF
     |    |              |    ||                            
-----L----A--------------V----RQ----------------------------
SVFYKPRTSRSEFIVSVNRYLEAKTQKLSVGMRFKMRFEGKRFSGTIVGVQENKSSVWHD
    | |  |   |     |    |    |        |     | | |           
----K-R--R---I-----Y-DI-T---NV-----L--E-----G-I-GL------I---
SEWRSLKVQWDEPSSVFRPERVSPWELEPLNLSDALCRELWHACAGPLVTLPREGERVYY
 |    |       |               | |       |             |     
-E-K--K-------S-----K---------N-S--I--Q-W-----------K-G-K---
FPEGHMEQLEASMHQGLEQQMPSFNLPSKILCKVINIQRRAEPETDEVYAQITLLPELDQ
   |    |    |         |    |  |     ||     |   |         | 
---G----LR---H---------FSM--KV-CE--KVQRKG---TTS-YNEVA-----D-
SEPTSPDAPVQEPEKCTVHSFCKTLTASDTSTHGGFSVLRRHADDCLPPLDMSQQPPWQE
 |       |   |      |  |   |    |     |   |       | |       
-E-----L-V-S-E------F--T-N-SN-N-H-----L---A--A----D-S-------
LVATDLHNSEWHFRHIFRGQPRRHLLTTGWSVFVSSKKLVAGDAFIFLRGENEELRVGVR
  | |          | |   ||        |          ||   |   |    |   
--AYD----Q---KNI-R---RR--------VY---------DA---L---N----V-L-
RHMRQQTNIPSSVISSHSMHIGVLATAAHAITTGTIFSVFYKPRTSRSEFIVSVNRYLEA
  |               |           |    | |   |                | 
--M--------------AM---------N-I----I-S---K----------------E-
KTQKLSVGMRFKMRFEPEKRFSGTIVGVQENKSSVWHDSEWRSLKVQWDEPSSVFRPERV
   |       |     |      |                   |  |            
---K-------K-----E------I-------------------K--W-----------I
SPWELEPL
    | | 
G---L-P-
4ldx 1cf7   96  668  149  14.37
DALCRELWHACAGPLVTLPREGERVYYFPEGHMEQLEASMHQGLEQQMPSFNLPSKILCK
                                                            
------------------------------------------------------------
VINIQRRAEPETDEVYAQITLLPELDQSEPTSPDAPVQEPEKCTVHSFCKTLTASDTSTH
    |||                                       |         | | 
----QRR---------------------------------------S--R------T-T-
GGFSVLRRHADDCLPPLDMSQQPPWQELVATDLHNSEWHFRHIFRGQPRRHLLTTGWSVF
  |                |         |     |          |             
--F----------------S---------A-----S----------Q-------------
VSSKKLVAGDAFIFLRGENEELRVGVRRHMRQPSSVISSHSMHIGVLATAAHAITTGTIF
     |   |          |                         |             
-----L---D----------E-------------------------L-------------
SVFYKPRTSRSEFIVSVNRYLEAKTQKLSVGMRFKMRFEGKRFSGTIVGVQENKSSVWHD
           |      |   |              ||  |   |              
-----------E------R---A--------------FE--R---T--------------
SEWRSLKVQWDEPSSVFRPERVSPWELEPLNLSDALCRELWHACAGPLVTLPREGERVYY
        |                   |    |               |      |   
--------Q-------Y-----------P----D-----I-Y-------T------R---
FPEGHMEQLEASMHQGLEQQMPSFNLPSKILCKVINIQRRAEPETDEVYAQITLLPELDQ
  |   | | |                          | |    |            |  
--E---E-L-A--------------------------Q-R----TN-----------L--
SEPTSPDAPVQEPEKCTVHSFCKTLTASDTSTHGGFSVLRRHADDCLPPLDMSQQPPWQE
   |         |            |             |                 | 
---T---------E------------A-------------R--------I--------Q-
LVATDLHNSEWHFRHIFRGQPRRHLLTTGWSVFVSSKKLVAGDAFIFLRGENEELRVGVR
 |        |     |  |                               |        
-V--------W-----F--Q-------------------------------N--------
RHMRQQTNIPSSVISSHSMHIGVLATAAHAITTGTIFSVFYKPRTSRSEFIVSVNRYLEA
|  |                         |                         |    
R--R-------------------------A-------------------------R----
KTQKLSVGMRFKMRFEPEKRFSGTIVGVQENKSSVWHDSEWRSLKVQWDEPSSVFRPERV
    |        |    |         |       |               |      |
----L--------R----K---------Q-------H--------------TS------V
SPWELEPL
|       
S-------
4ldx 1fjl   57  668   64   8.53
DALCRELWHACAGPLVTLPREGERVYYFPEGHMEQLEASMHQGLEQQMPSFNLPSKILCK
      |   |     |  |    |          |    |    ||          || 
-RI--PL--SC-----TICRK-RKV----K--CDKLR-P-H--C-QQCTKTGV-AH-LCH
VINIQRRAEPETDEVYAQITLLPELDQSEPTSPDAPVQEPEKCTVHSFCKTLTASDTSTH
    |  || |  |      ||   |  |           |   |    | |      | 
YME-QTWAE-EA-E--KE--LL-K-D-NE-LK---KLR--ER--V----KSL---E-KT-
GGFSVLRRHADDCLPPLDMSQQPPWQELVATDLHNSEWHFRHIFRGQPRRHLLTTGWSVF
     ||        ||  |          |           | |   |           
-----LRKR-NR-I-PL--S---------CT-----------ICR-K-RK----------
VSSKKLVAGDAFIFLRGENEELRVGVRRHMRQPSSVISSHSMHIGVLATAAHAITTGTIF
|   |    |           |    | |  |            ||    ||        
V---K--C-D-----K-----L----RPHCQQ----CTK-T---GV----AH------L-
SVFYKPRTSRSEFIVSVNRYLEAKTQKLSVGMRFKMRFEGKRFSGTIVGVQENKSSVWHD
   |   |   |        |  |   |      | | |  |       |   | |    
-CHYMEQT-WAE---EAEKEL-LKDNEL----K-KLR-E--R-------V---K-SL---
SEWRSLKVQWDEPSSVFRPERVSPWELEPLNLSDALCRELWHACAGPLVTLPREGERVYY
 |   |           |  |            | | |   | |     |    |  |  
-E-KTLRIPL-S-CTICR-KR----KVK----CDKL-RP--H-CQ-Q-CT--KTG--V--
FPEGHMEQLEASMHQGLEQQMPSFNLPSKILCKVINIQRRAEPETDEVYAQITLLPELDQ
    |   |    |   | |                    || |  |      ||   | 
---AH---L-C--HY-ME-Q--TW----------------AE-EA-E--KE--LL-K-D-
SEPTSPDAPVQEPEKCTVHSFCKTLTASDTSTHGGFSVLRRHADDCLPPLDMSQQPPWQE
 |           |   |    | |      |      | |       ||  |       
NE-LK---KLR--ER--V----KSL---E-KT------LKRNR---I-PL--S-------
LVATDLHNSEWHFRHIFRGQPRRHLLTTGWSVFVSSKKLVAGDAFIFLRGENEELRVGVR
   |           | |   |           |   |    |           |    |
--CT-----------ICR-K-RK----------V---K--C-D-----K-----L----R
RHMRQQTNIPSSVISSHSMHIGVLATAAHAITTGTIFSVFYKPRTSRSEFIVSVNRYLEA
 |  ||               ||    ||                           | | 
PHC-QQ-------CTK-T---GV----AH------L--C-H---------------YME-
KTQKLSVGMRFKMRFEPEKRFSGTIVGVQENKSSVWHDSEWRSLKVQWDEPSSVFRPERV
  |            | ||            |     | |   ||          | |||
--Q--T----W-AE-EAEK--E--L--L---K-----DNE---LK----K---L-R-ERV
SPWELEPL
   |   |
KSLE-KTL
4ldx 1hwt  126  668  287  18.86
DALCRELWHACAGPLVTLPREGERVYYFPEGHMEQLEASMHQGLEQQMPSFNLPSKILCK
     |              |          |        | |       | | |  |  
Q---KER-RK-I-EIKFI--E-NKT----RRHV-TFSKRKH-GI-MK-KAFEL-S-VL--
VINIQRRAEPETDEVYAQITLLPELDQSEPTSPDAPVQEPEKCTVHSFCKTLTASDTSTH
           |     |  ||  |  || |     |      |   |        |   
--T----G---T-----QV-LL--LVVSE-TG--L-VY-TFS-T-PKF-EPI-V--TQQE
GGFSVLRRHADDCLPPLDMSQQPPWQELVATDLHNSEWHFRHIFRGQPRRHLLTTGWSVF
|        |  |   |      |       |    |  |  |     |||   |    |
GR-NLI-Q-A--C---LN-A---P--D----DRRKIEIKF--I-ENKTRRH-V-T----F
VSSKKLVAGDAFIFLRGENEELRVGVRRHMRQPSSVISSHSMHIGVLATAAHAITTGTIF
 |  |   |   |       || |       |   |         |         ||   
-SKRK--HG---I-MK-KAFELSV-L-TG-TQ---VL----L-L-VV---SE---TG-L-
SVFYKPRTSRSEFIVSVNRYLEAKTQKLSVGMRFKMRFEGKRFSGTIVGVQENKSSVWHD
 | |   |    |  |     |       |        || |        |         
-V-Y---T----F--STPKF-E----PI-V--T-Q-Q-EG-R-N--L--IQ---------
SEWRSLKVQWDEPSSVFRPERVSPWELEPLNLSDALCRELWHACAGPLVTLPREGERVYY
     |    |    ||    |        | |             |     | | |   
A---CLNAP-D--GLVFN-V-VTQ-DM--INKS-T--K--------P---Y-R-GHR---
FPEGHMEQLEASMHQGLEQQMPSFNLPSKILCKVINIQRRAEPETDEVYAQITLLPELDQ
|     |         ||    |         |  ||     |     |        || 
FTK---ENVR--I---LE----SW-F-A----K--NIE---NP-----Y--------LD-
SEPTSPDAPVQEPEKCTVHSFCKTLTASDTSTHGGFSVLRRHADDCLPPLDMSQQPPWQE
   |         |        |      ||     |   |                |  
---TK--G-L---E--NL--M-K-----NTS----LS---R--------IQI-KN--W--
LVATDLHNSEWHFRHIFRGQPRRHLLTTGWSVFVSSKKLVAGDAFIFLRGENEELRVGVR
 |     |     |   |   |     ||  ||      |  |  |         | |  
-V-S---N-----R---R---RKE--KTG-LVF--N--VVTQD-MI-NK-STKPYR-G--
RHMRQQTNIPSSVISSHSMHIGVLATAAHAITTGTIFSVFYKPRTSRSEFIVSVNRYLEA
 | |  |     |       |  |             |            |   | ||  
-H-R-FTK--ENV------RI--L----E--------S-WF----AKN--I-E-NPYLD-
KTQKLSVGMRFKMRFEPEKRFSGTIVGVQENKSSVWHDSEWRSLKVQWDEPSSVFRPERV
 | |   |         |            |  |    |     |  |   |   |  | 
-T-K---G----L----E---N--L--M-KN-TSL---SRIQ-IK-NW--VSN--R-RR-
SPWELEPL
   |    
K--E-K-T
4ldx 1mnm  127  668  320  19.01
DALCRELWHACAGPLVTLPREGERVYYFPEGHMEQLEASMHQGLEQQMPSFNLPSKILCK
        |    |   |    |     |  |  | |    |          |  |    
-S------H----P--DLNKLLE-L-W-P--HI-Q-E---YQ--D--L-A--L--K---H
VINIQRRAEPETDEVYAQITLLPELDQSEPTSPDAPVQEPEKCTVHSFCKTLTASDTSTH
 ||         |    |       |           |      |      |      | 
GIN---------D-IF-Q-------DNG---G-KL-LQ------V--L---L----I-T-
GGFSVLRRHADDCLPPLDMSQQPPWQELVATDLHNSEWHFRHIFRGQPRRHLLTTGWSVF
 |  |        | |             | |  |          ||     |    |  
-GLTV--------L-P---GRE--GND--AVD--NA---------GQ--EYEL-K--S--
VSSKKLVAGDAFIFLRGENEELRVGVRRHMRQPSSVISSHSMHIGVLATAAHAITTGTIF
         |      |           ||  |  ||      |   |          ||
I-N---I--D--L-TKG----F--STHHHM-NP--VI------I---A-KYRQV-P-WIF
SVFYKPRTSRSEFIVSVNRYLEAKTQKLSVGMRFKMRFEGKRFSGTIVGVQENKSSVWHD
   |  |      |    | || |   |     |      |          | |   |  
AI-Y--R-GIA--IEAIYR-LEPK-D-L----EF-Y-YD-K-W--------ERK---WY-
SEWRSLKVQWDEPSSVFRPERVSPWELEPLNLSDALCRELWHACAGPLVTLPREGERVYY
|     |   |            |    |         |  |   |   |         |
SDGH--K---D----I----N-NP-KI-PVKY--VM--E--H---G---T------KI-Y
FPEGHMEQLEASMHQGLEQQMPSFNLPSKILCKVINIQRRAEPETDEVYAQITLLPELDQ
           | |       |   |  | |           |   | | |      |  
-----------S-H-------P--DL-NKLL-E---LW----PHIQE-Y-Q-----DL--
SEPTSPDAPVQEPEKCTVHSFCKTLTASDTSTHGGFSVLRRHADDCLPPLDMSQQPPWQE
       |      |   |         |    ||           |  |    |     
-------A-L----K---HGI-NDI-FQD---NGG-----K-----L--L----Q-V-L-
LVATDLHNSEWHFRHIFRGQPRRHLLTTGWSVFVSSKKLVAGDAFIFLRGENEELRVGVR
|  | |              | |     |    |      ||     |   |  |  |  
LI-TGL--T------VL---PGRE----G-NDAVDN----AGQEY-ELKSINIDLTKGFS
RHMRQQTNIPSSVISSHSMHIGVLATAAHAITTGTIFSVFYKPRTSRSEFIVSVNRYLEA
 |     | |  ||      |   |          ||   |  |      |    | || 
TH-HHM-N-P--VI------I---A-KYRQV-P-WIFAI-Y--R-GIA--IEAIYR-LEP
KTQKLSVGMRFKMRFEPEKRFSGTIVGVQENKSSVWHDSEWRSLKVQWDEPSSVFRPERV
|   |          |  |  |    |    |             |       |   |  
K-D-LE--FYYD-KWE-RKWYS-D--G---HK-DI--NNP-K-IPVKY-----VM--EH-
SPWELEPL
        
GT-KI--Y
4ldx 1pvi  123  668  312  18.41
DALCRELWHACAGPLVTLPREGERVYYFPEGHMEQLEASMHQGLEQQMPSFNLPSKILCK
               |  |       |   |       |   |       | | |    |
-----------S---V--P--SQKT-Y--QG-------S-Y-GF--RL-GF-LHSG-TAK
VINIQRRAEPETDEVYAQITLLPELDQSEPTSPDAPVQEPEKCTVHSFCKTLTASDTSTH
           |   |               || |      |     ||  | |    | 
--SV--TC---T---Y---------------SP-A-L---NK--M--FCQ-L-A---KT-
GGFSVLRRHADDCLPPLDMSQQPPWQELVATDLHNSEWHFRHIFRGQPRRHLLTTGWSVF
            |  |    |   |   |  |   |           |       |    
------------C--P--V-QL--W---V--D---S----------TP-----PPG----
VSSKKLVAGDAFIFLRGENEELRVGVRRHMRQPSSVISSHSMHIGVLATAAHAITTGTIF
                      |  |    |          |          |     | 
--T-------------------R--V----R---------AM----------A-----I-
SVFYKPRTSRSEFIVSVNRYLEAKTQKLSVGMRFKMRFEGKRFSGTIVGVQENKSSVWHD
   ||          |        |    |      |    |                | 
---YK------Q---S--QHM---TE---V-----VR----R-------C-PH-----H-
SEWRSLKVQWDEPSSVFRPERVSPWELEPLNLSDALCRELWHACAGPLVTLPREGERVYY
 | |      |   |        |    |            |     |        ||  
-E-R---CS-D---S----DGLAP----P---------Q--H-----LI-------RV--
FPEGHMEQLEASMHQGLEQQMPSFNLPSKILCKVINIQRRAEPETDEVYAQITLLPELDQ
  ||     |      |      |   |     |        |     |           
--EGNL-RVE---Y--LDDR-NTFR-HS-----VV-V-----P-----Y-----------
SEPTSPDAPVQEPEKCTVHSFCKTLTASDTSTHGGFSVLRRHADDCLPPLDMSQQPPWQE
 ||  |   |     ||      |        |            |      |       
-EP--PE--VGS-D-CT------TI-------H--YN----YM--C----N-S------S
LVATDLHNSEWHFRHIFRGQPRRHLLTTGWSVFVSSKKLVAGDAFIFLRGENEELRVGVR
       |     |   |  |    | |          |   |      | |  |  |  
CMG-GM-N-----R---R--P---IL-T---I-I-T--L-E-DS----SG-N--L-LG--
RHMRQQTNIPSSVISSHSMHIGVLATAAHAITTGTIFSVFYKPRTSRSEFIVSVNRYLEA
   |   |                             | |        |    | |    
---R---N-----------------------------S-F--------E----V-R----
KTQKLSVGMRFKMRFEPEKRFSGTIVGVQENKSSVWHDSEWRSLKVQWDEPSSVFRPERV
      |         |         |          |   |             | |  
------V-C--AC---P---------G----R-----D---R-------------RTE--
SPWELEPL
   | | |
---E-ENL
4ldx 1tsr  102  668  194  15.27
DALCRELWHACAGPLVTLPREGERVYYFPEGHMEQLEASMHQGLEQQMPSFNLPSKILCK
            |        |     |  |         | |  |   | | | |    
----K-------G--------G----WF--G-----K---HRG--QG-GS-N-P-K-F-E
VINIQRRAEPETDEVYAQITLLPELDQSEPTSPDAPVQEPEKCTVHSFCKTLTASDTSTH
  ||   |  |     |    |  |      |    |   |         | |  |    
--NI---A--E-G-LRA----L--L--AR--S-H--V---E--------RT-T--D---E
GGFSVLRRHADDCLPPLDMSQQPPWQELVATDLHNSEWHFRHIFRGQPRRHLLTTGWSVF
 |                      |   ||         |     |        |  |  
-G-----------------T----W---VA-GV------F--VYGGS--K----T--SLY
VSSKKLVAGDAFIFLRGENEELRVGVRRHMRQPSSVISSHSMHIGVLATAAHAITTGTIF
        | |                |    |     |     |    |      |   
-NLRR---GTA-LAI----PQ----C-R-L-TP---L-SR-LPFG-M--AP-G--PG---
SVFYKPRTSRSEFIVSVNRYLEAKTQKLSVGMRFKMRFEGKRFSGTIVGVQENKSSVWHD
     |   | | ||    |         |   |        |    |     |     |
P---QPGPLR-ESIV-C--YF------M-V---F-L--QTHIFA-E-V-L---KDAI-KD
SEWRSLKVQWDEPSSVFRPERVSPWELEPLNLSDALCRELWHACAGPLVTLPREGERVYY
     | |          |    |      |     |        |  | ||  |     
-----L-VM-----T--KP---AP----TCNIRVTVC-S-FD--DG--VDLPK-G-G--W
FPEGHMEQLEASMHQGLEQQMPSFNLPSKILCKVINIQRRAEPETDEVYAQITLLPELDQ
|  |         | |  |   | | | |      ||   |  |     |   ||     
F--G-----K---HRG--QG-GS-N-P-K-F-E--NI---A--E-G-LRA---LLAR-SH
SEPTSPDAPVQEPEKCTVHSFCKTLTASDTSTHGGFSVLRRHADDCLPPLDMSQQPPWQE
 | |  |    |        |      | ||       |||     |        |    
VERTT-D----E-GTWVAGVF--VYGGSKTSL---YN-LRR-G-TAL-AI-----PQCR-
LVATDLHNSEWHFRHIFRGQPRRHLLTTGWSVFVSSKKLVAGDAFIFLRGENEELRVGVR
|  | |  |    |      |           |        |       |       |  
L--TPL--S----R-L----P-----------F--G--MAPG-P-----GP-QP---G--
RHMRQQTNIPSSVISSHSMHIGVLATAAHAITTGTIFSVFYKPRTSRSEFIVSVNRYLEA
   |       |      |    | |  |      |   |        |  |       |
-PLR-E-----SIV-CYFM-V-FLQT--H------I---F-------AE--V-L-K--DA
KTQKLSVGMRFKMRFEPEKRFSGTIVGVQENKSSVWHDSEWRSLKVQWDEPSSVFRPERV
    | | |  |    |      |      |          |   |      | |    |
-IKDL-V-MT-K----P----APT---C--N---I------R-VTV-----CS-F-DDGV
SPWELEPL
    | | 
---DL-P-
4ldx 1b3t  127  668  294  19.01
-------D----A------LCR---ELWH--A-------CA-GPLVTLP-R---E--G-E
       |    |        |      |  |        |   |   | |      |  
MKPVTLYDVAEYAGVSYQTVSRVVNQASHVSAKTREKVEAAMAELNYIPNRVAQQLAGKQ
---R-V--Y----Y----F---P----E-GHM-----EQLEASM----H------QGL--
     |  |    |                |      |  || |           | |  
SLMKPVTLYDVAEYAGVSYQTVSRVVNQASHVSAKTREKVEAAMAELNYIPNRVAQQLAG
EQQ-M-P-S-FNL---P--S-KILCKVIN----I--Q-R-RAEPETDEV-Y-----A-QI
 |  | |            |      | |         |   |    |  |     | | 
KQSLMKPVTLYDVAEYAGVSYQTVSRVVNQASHVSAKTREKVEAAMAELNYIPNRVAQQL
----TLL-P-EL-D--Q----SEPT-S--PD-AP-V----QEP-E----KCT-V-H--S-
     |  |  | |       |  | |     |  |     |  |               
AGKQSLMKPVTLYDVAEYAGVSYQTVSRVVNQASHVSAKTREKVEAAMAELNYIPNRVAQ
-FC-K-TL----TASDTSTH-G-GF---S-VLRR--H--A---D--D-CLPPL----D-M
    |  |    |  |     |      | |     |  |            |       
QLAGKQSLMKPVTLYDVAEYAGVSYQTVSRVVNQASHVSAKTREKVEAAMAELNYIPNRV
SQQ-PPWQELV-ATDLHN-SEW---HF----R------HI---FR-------GQ----P-
 ||    | |     |    |          |      |     |             | 
AQQLAGKQSLMKPVTLYDVAEYAGVSYQTVSRVVNQASHVSAKTREKVEAAMAELNYIPN
R--RHL-----L---TTGWSV--F--VSSKKL--VAGDA-FIFLR-GEN-E----ELR-V
|    |     |    |   |     ||      |   |        |  |    ||   
RVAQQLAGKQSLMKPVTLYDVAEYAGVSYQTVSRVVNQASHVSAKTREKVEAAMAELNYI
-G-VRRHM--RQ----PSSV--ISSHS-M-H--IG-VLATAAH--AITTGTI-FSV--F-
   |       |    |                   |   | |  | |            
PNRVAQQLAGKQSLMKPVTLYDVAEYAGVSYQTVSRVVNQASHVSAKTREKVEAAMAELN
YKP-R-----T---S--R-------SEF--I----VS--VNR--YLEAKT-QKLSVGM-R
| | |         |           |        ||  ||      |||  |    |  
YIPNRVAQQLAGKQSLMKPVTLYDVAEYAGVSYQTVSRVVNQASHVSAKTREKVEAAMAE
FK-M--RF--E--GKR--FSG-TI--V----GV--Q---E--NKSS-V---W-H--D---
      |      ||       |   |    ||  |      |  | |            
LNYIPNRVAQQLAGKQSLMKPVTLYDVAEYAGVSYQTVSRVVNQASHVSAKTREKVEAAM
SE--W---R---------SL-K-VQ-WD--EPSSV-FRP-ER-VS-PWELE-PLNLS-DA
 |      |         || | |   |  |   |      | |               |
AELNYIPNRVAQQLAGKQSLMKPVTLYDVAEYAGVSYQTVSRVVNQASHVSAKTREKVEA
LCREL-W--H--A--CAG--PL---VTL-P-RE--G---ERV-YYFPE-GHM-----EQL
   ||       |   ||   |   |||    |  |     |        |      |  
AMAELNYIPNRVAQQLAGKQSLMKPVTLYDVAEYAGVSYQTVSRVVNQASHVSAKTREKV
EASM----H------QGL--EQQ-M-P-S-FNL---P--S-KILCKVIN----I--Q-R-
|| |           | |   |  | |            |      | |         | 
EAAMAELNYIPNRVAQQLAGKQSLMKPVTLYDVAEYAGVSYQTVSRVVNQASHVSAKTRE
RAEPETDEV-Y-----A-QI----TLL-P-EL-D--Q----SEPT-S--PD-AP-V----
  |    |  |     | |      |  |  | |       |  | |     |  |    
KVEAAMAELNYIPNRVAQQLAGKQSLMKPVTLYDVAEYAGVSYQTVSRVVNQASHVSAKT
QEP-E----KCT-V-H--S--FC-K-TL----TASDTSTH-G-GF---S-VLRR--H--A
 |  |                   |  |    |  |     |      | |     |  |
REKVEAAMAELNYIPNRVAQQLAGKQSLMKPVTLYDVAEYAGVSYQTVSRVVNQASHVSA
---D--D-CLPPL----D-MSQQ-PPWQELV-ATDLHN-SEW---HF----R------HI
            |        ||    | |     |    |          |      | 
KTREKVEAAMAELNYIPNRVAQQLAGKQSLMKPVTLYDVAEYAGVSYQTVSRVVNQASHV
---FR-------GQ----P-R--RHL-----L----T-------TG--W---S--V----
    |             | |    |     |    |        |      |  |    
SAKTREKVEAAMAELNYIPNRVAQQLAGKQSLMKPVTLYDVAEYAGVSYQTVSRVVNQAS
FVSSK---KL-VA-GDA-FI---F---LRG-EN--E--EL-RV----G-----V-R---R
 || |   |   |      |       | |         |  |    |     | |    
HVSAKTREKVEAAMAELNYIPNRVAQQLAGKQSLMKPVTLYDVAEYAGVSYQTVSRVVNQ
--HM----RQ--Q---T--N-IPSSV---IS-SHS-M-----H-I----GV-LAT-----
  |     |          | ||  |        | |            ||   |     
ASHVSAKTREKVEAAMAELNYIPNRVAQQLAGKQSLMKPVTLYDVAEYAGVSYQTVSRVV
--AAH--AITTGTI-FSV--F-YKP-R-----T---S--R-------SEF--I----VS-
  | |  | |            | | |         |           |        || 
NQASHVSAKTREKVEAAMAELNYIPNRVAQQLAGKQSLMKPVTLYDVAEYAGVSYQTVSR
-VNR--YLEAKT-QKLSVGM-RFK-M--RF-EP-E-KR--FSG-TI--V----GV--Q--
 ||      |||  |    |        |       |       |   |    ||  |  
VVNQASHVSAKTREKVEAAMAELNYIPNRVAQQLAGKQSLMKPVTLYDVAEYAGVSYQTV
-E--NKSS-V---W-H--D---SE--W---R---------SL-K-VQ-WD--E-P--S--
    |  | |             |      |         || | |   |  |    |  
SRVVNQASHVSAKTREKVEAAMAELNYIPNRVAQQLAGKQSLMKPVTLYDVAEYAGVSYQ
--S--V-----F--RP-ERV-SPW-ELE--P------------L
  |  |           | |     ||   |            |
TVSRVVNQASHVSAKTREKVEAAMAELNYIPNRVAQQLAGKQSL
4ldx 1cjg  259  668 1364  18.99
DALCRELWHACAGPLVTLPREGERVYYFPEGHMEQLEASMHQGLEQQMPSFNLPSKILCK
        |                 |                                 
----K---H-----------------Y---------------------------------
VINIQRRAEPETDEVYAQITLLPELDQSEPTSPDAPVQEPEKCTVHSFCKTLTASDTSTH
      |                                                     
------R-----------------------------------------------------
GGFSVLRRHADDCLPPLDMSQQPPWQELVATDLHNSEWHFRHIFRGQPRRHLLTTGWSVF
 |  |  |            |  |             |       |             |
-G--V--R------------QR-P-------------W-------G---K---------F
VSSKKLVAGDAFIFLRGENEELRVGVRRHMRQPSSVISSHSMHIGVLATAAHAITTGTIF
       |  |         |         | |                   |       
-------A--A---------E----I----RDP-------------------A-------
SVFYKPRTSRSEFIVSVNRYLEAKTQKLSVGMRFKMRFEGKRFSGTIVGVQENKSSVWHD
    |            |                              |           
----K------------N------------------------------G-----------
SEWRSLKVQWDEPSSVFRPERVSPWELEPLNLSDALCRELWHACAGPLVTLPREGERVYY
                    ||  |              |     |   |          
--------------A-----RV--W--------------L-----G---T----------
FPEGHMEQLEASMHQGLEQQMPSFNLPSKILCKVINIQRRAEPETDEVYAQITLLPELDQ
                       |                   ||    |          
-----------------------F-------------------ET----A----------
SEPTSPDAPVQEPEKCTVHSFCKTLTASDTSTHGGFSVLRRHADDCLPPLDMSQQPPWQE
 |    ||                  |           |   |                 
-E----DA------------------A-----------L---A--------------Y--
LVATDLHNSEWHFRHIFRGQPRRHLLTTGWSVFVSSKKLVAGDAFIFLRGENEELRVGVR
    |                 |                 |  |  |             
----D-----------------R-----------------A--A--F-------------
RHMRQQTNIPSSVISSHSMHIGVLATAAHAITTGTIFSVFYKPRTSRSEFIVSVNRYLEA
| ||                             |                  |  |   |
R-MR-----------------------------G------------------S--R---A
KTQKLSVGMRFKMRFEPEKRFSGTIVGVQENKSSVWHDSEWRSLKVQWDEPSSVFRPERV
    |         | |                          |              ||
----L-------LNF-P--------------------------L--------------RV
SPWELEPL
        
--------
4ldx 1gcc   54  668   63   8.08
DALCRELWHACAGPLVTLPREGERVYYFPEGHMEQLEASMHQGLEQQMPSFNLPSKILCK
    |  |         |           |  | |   |  |      |   |   |   
-RM-RP-W---------L-----------E--M-QIN-S-NQ-I----P--GL---I-W-
VINIQRRAEPETDEVYAQITLLPELDQSEPTSPDAPVQEPEKCTVHSFCKTLTASDTSTH
 ||     | |      ||                |     |   |   |         |
-IN---K-E-EM--IF-QI----------------P-W---K---HA-AK---------H
GGFSVLRRHADDCLPPLDMSQQPPWQELVATDLHNSEWHFRHIFRGQPRRHLLTTGWSVF
 |        | ||     |    |    |            |       |   ||    
-GWDI-NK--DACL--F-RS----W----A------------I-------H---TG-R-Y
VSSKKLVAGDAFIFLRGENEELRVGVRRHMRQPSSVISSHSMHIGVLATAAHAITTGTIF
    |     |     ||  |           |                           
----K-----A-----GE-KE-----------P---------------------------
SVFYKPRTSRSEFIVSVNRYLEAKTQKLSVGMRFKMRFEGKRFSGTIVGVQENKSSVWHD
     | |    |     |   |            |       |       |    |  |
D----PKTWKANF-----R-C-A------------M-----N-S--LPDIEE----V-KD
SEWRSLKVQWDEPSSVFRPERVSPWELEPLNLSDALCRELWHACAGPLVTLPREGERVYY
   |  |      | |    ||               |  |         |         
QS-RN-K---GS-SAV----RV--Y-----RM---M-RP-W---------L---------
FPEGHMEQLEASMHQGLEQQMPSFNLPSKILCKVINIQRRAEPETDEVYAQITLLPELDQ
  |  | |   |  |      |   |   |    ||     | |      ||        
--E--M-QIN-S-NQ-I----P--GL---I-W--IN---K-E-EM--IF-QI--------
SEPTSPDAPVQEPEKCTVHSFCKTLTASDTSTHGGFSVLRRHADDCLPPLDMSQQPPWQE
        |     |   |   |         | |        | ||     |    |  
--------P-W---K---HA-AK---------H-GWDI-NK--DACL--F-RS----W--
LVATDLHNSEWHFRHIFRGQPRRHLLTTGWSVFVSSKKLVAGDAFIFLRGENEELRVGVR
  |            |       |   ||        |     |     ||  |      
--A------------I-------H---TG-R-Y----K-----A-----GE-KE------
RHMRQQTNIPSSVISSHSMHIGVLATAAHAITTGTIFSVFYKPRTSRSEFIVSVNRYLEA
         |                                | |    |     |   |
---------P---------------------------D----PKTWKANF-----R-C-A
KTQKLSVGMRFKMRFEPEKRFSGTIVGVQENKSSVWHDSEWRSLKVQWDEPSSVFRPERV
        |       |       |    |    |  |   |  |      | |    ||
--------MN-SL---PD------I---EE----V-KDQS-RN-K---GS-SAV----RV
SPWELEPL
        
--Y--R-M
4ldx 1if1  111  668  209  16.62
DALCRELWHACAGPLVTLPREGERVYYFPEGHMEQLEASMHQGLEQQMPSFNLPSKILCK
                                |  |      |     |          |
--------------------------------M--L---I-KG-----P-W---T----K
VINIQRRAEPETDEVYAQITLLPELDQSEPTSPDAPVQEPEKCTVHSFCKTLTASDTSTH
        | | |    |                  |            | |        
--------E-E-D----Q--------R---------V-------I----K-L--------
GGFSVLRRHADDCLPPLDMSQQPPWQELVATDLHNSEWHFRHIFRGQPRRHLLTTGWSVF
    |                    |                   | | |      ||  
----V--------------------Q--------------K--Y-G-PKR------WS--
VSSKKLVAGDAFIFLRGENEELRVGVRRHMRQPSSVISSHSMHIGVLATAAHAITTGTIF
|         |                                        |        
V-----I---A-------------------K--------------------H--------
SVFYKPRTSRSEFIVSVNRYLEAKTQKLSVGMRFKMRFEGKRFSGTIVGVQENKSSVWHD
                           |      |    | |    | |           
---------------------------L------K----G-R----I-G-----------
SEWRSLKVQWDEPSSVFRPERVSPWELEPLNLSDALCRELWHACAGPLVTLPREGERVYY
      | |                           ||| |                   
------K-Q---------------------------CRERW-------------------
FPEGHMEQLEASMHQGLEQQMPSFNLPSKILCKVINIQRRAEPETDEVYAQITLLPELDQ
    |        |  |       | |     |           |       |       
----H------N-H--L-------N-P-EV--K------K----T-S-W---T-------
SEPTSPDAPVQEPEKCTVHSFCKTLTASDTSTHGGFSVLRRHADDCLPPLDMSQQPPWQE
 |         | |              |           |                 | 
-E---------E-E--------------D-----------R-----I--I-------YQ-
LVATDLHNSEWHFRHIFRGQPRRHLLTTGWSVFVSSKKLVAGDAFIFLRGENEELRVGVR
  |   |      |    |   |      |             |         |      
--A---H--K---R-L--G--NR------W-------------A---------E--I-A-
RHMRQQTNIPSSVISSHSMHIGVLATAAHAITTGTIFSVFYKPRTSRSEFIVSVNRYLEA
         |                       |         ||         |    |
K-L-----LP-----------------------G---------RT---D-----N----A
KTQKLSVGMRFKMRFEPEKRFSGTIVGVQENKSSVWHDSEWRSLKVQWDEPSSVFRPERV
                  |           |     |          |   |   |  | 
------I-----------K-----------N-----H----------WN--STM-R--R-
SPWELEPL
        
-----K-V
4ldx 1mse   69  668  105  10.33
DALCRELWHACAGPLVTLPREGERVYYFPEGHMEQLEASMHQGLEQQMPSFNLPSKILCK
    |    ||            |                 |  |     |  ||   ||
-S--R-T--AC--------K---RC------RLKKIKCD--Q--E-----F--PS---CK
VINIQRRAEPETDEVYAQITLLPELDQSEPTSPDAPVQEPEKCTVHSFCKTLTASDTSTH
      |         |       |   |       |  |  | | |    |   |  | 
------RC--------A------KL---E-------V--P--C-V-S----L---DPAT-
GGFSVLRRHADDCLPPLDMSQQPPWQELVATDLHNSEWHFRHIFRGQPRRHLLTTGWSVF
 |               |          |                  | |       |  
-G-----K---------D----------V------------------P-R-------S-Y
VSSKKLVAGDAFIFLRGENEELRVGVRRHMRQPSSVISSHSMHIGVLATAAHAITTGTIF
      |    | ||    |  |  |   |           |   ||             
------V----F-FL----ED-RLAV---M-----------MR--VL-------------
SVFYKPRTSRSEFIVSVNRYLEAKTQKLSVGMRFKMRFEGKRFSGTIVGVQENKSSVWHD
    |      |    |       | |         |  |      |        |   |
----K------EY--GV----D-PT-K--I------R--G---N--I----P-ATS---D
SEWRSLKVQWDEPSSVFRPERVSPWELEPLNLSDALCRELWHACAGPLVTLPREGERVYY
          |||   |         |       | |      |            |   
----------DEP---F--------DLK--SRT-A-CK---R-C------------R---
FPEGHMEQLEASMHQGLEQQMPSFNLPSKILCKVINIQRRAEPETDEVYAQITLLPELDQ
              |  |     |  ||   ||      |         |       |  
-----LKKIKCD--Q--E-----F--PS---CK------RC--------A------KL--
SEPTSPDAPVQEPEKCTVHSFCKTLTASDTSTHGGFSVLRRHADDCLPPLDMSQQPPWQE
 |       |  |  | | |    |   |  |  |               |         
-E-------V--P--C-V-S----L---DPAT--G-----K---------D---------
LVATDLHNSEWHFRHIFRGQPRRHLLTTGWSVFVSSKKLVAGDAFIFLRGENEELRVGVR
 |                  | |       |        |    | ||    |  |  | 
-V------------------P-R-------S-Y------V----F-FL----ED-RLAV-
RHMRQQTNIPSSVISSHSMHIGVLATAAHAITTGTIFSVFYKPRTSRSEFIVSVNRYLEA
  |               |                           |      |      
--M---------------M---------------------------R------V------
KTQKLSVGMRFKMRFEPEKRFSGTIVGVQENKSSVWHDSEWRSLKVQWDEPSSVFRPERV
    |      |     |        |                  |  |       |   
----L------K-----E--Y-----G------------------V--D-------P---
SPWELEPL
        
T-------
4ldx 1pyi  102  668  158  15.27
DALCRELWHACAGPLVTLPREGERVYYFPEGHMEQLEASMHQGLEQQMPSFNLPSKILCK
         ||                 |           | |               | 
-T----I--AC-----------------P-----------HKG---------------C-
VINIQRRAEPETDEVYAQITLLPELDQSEPTSPDAPVQEPEKCTVHSFCKTLTASDTSTH
                              |          |     |       |    
------------------------------T----------K--M--F-R-----D---N
GGFSVLRRHADDCLPPLDMSQQPPWQELVATDLHNSEWHFRHIFRGQPRRHLLTTGWSVF
   |  | |                       ||       |   | || |         
---SAMRKH-----------------------LH-T-----H---G-PRVH---------
VSSKKLVAGDAFIFLRGENEELRVGVRRHMRQPSSVISSHSMHIGVLATAAHAITTGTIF
|       | ||     |   |     ||  |             |     |   ||   
VCA-E--CGKAFV----ESSKL----KRH--Q-----------L-V-----H---TG---
SVFYKPRTSRSEFIVSVNRYLEAKTQKLSVGMRFKMRFEGKRFSGTIVGVQENKSSVWHD
    ||      |           |            ||     |   |    |      
E---KP------F--------QC-T------------FE-----G--CG----K------
SEWRSLKVQWDEPSSVFRPERVSPWELEPLNLSDALCRELWHACAGPLVTLPREGERVYY
   |            |     |   |   |    | |   |      |       |   
---R------------F-----S---LD-FN----L-R-T-H------V-------RI--
FPEGHMEQLEASMHQGLEQQMPSFNLPSKILCKVINIQRRAEPETDEVYAQITLLPELDQ
    |          |                       |  |     |           
----H------T---G-D---------------------R--P-----Y-----------
SEPTSPDAPVQEPEKCTVHSFCKTLTASDTSTHGGFSVLRRHADDCLPPLDMSQQPPWQE
         |     |    |       |     |          |              
---------V-----C---PF-------D-----G----------C--------------
LVATDLHNSEWHFRHIFRGQPRRHLLTTGWSVFVSSKKLVAGDAFIFLRGENEELRVGVR
       |                            ||        |             
-------N----------------------------KK--------F-----------A-
RHMRQQTNIPSSVISSHSMHIGVLATAAHAITTGTIFSVFYKPRTSRSEFIVSVNRYLEA
    | ||         | ||  | |  |                              |
----QSTN-----L-K-S-HI--L-T--H------------------------------A
KTQKLSVGMRFKMRFEPEKRFSGTIVGVQENKSSVWHDSEWRSLKVQWDEPSSVFRPERV
                                                            
------------------------------------------------------------
SPWELEPL
        
--------
4ldx 1ubd   77  668  114  11.53
DALCRELWHACAGPLVTLPREGERVYYFPEGHMEQLEASMHQGLEQQMPSFNLPSKILCK
             |  ||    |    |       |  | |                 | 
-------------P--TL----E---WF-------L--S-H-----------------C-
VINIQRRAEPETDEVYAQITLLPELDQSEPTSPDAPVQEPEKCTVHSFCKTLTASDTSTH
   |           |             | |         |    |   ||       |
--HI-HK--------Y-------------P-S---------K----S---TL------IH
GGFSVLRRHADDCLPPLDMSQQPPWQELVATDLHNSEWHFRHIFRGQPRRHLLTTGWSVF
 |       |                |   | |         |            | || 
QG----EK-A----------------E---T-L------Y-YIV-----K-----G-SVA
VSSKKLVAGDAFIFLRGENEELRVGVRRHMRQPSSVISSHSMHIGVLATAAHAITTGTIF
|    |      |      ||   |                | |  |             
V----L------I--K-D-EE---G-----KE---------M-I--L-------------
SVFYKPRTSRSEFIVSVNRYLEAKTQKLSVGMRFKMRFEGKRFSGTIVGVQENKSSVWHD
|  |        ||       |     |  |      ||         | |         
S--Y---LNQGDFI---G---E-----L--G----L-FE-E-------G-Q---------
SEWRSLKVQWDEPSSVFRPERVSPWELEPLNLSDALCRELWHACAGPLVTLPREGERVYY
 | ||    |     |    |             | | |     |          |   |
-E-RS--A-W-----V----R-A----K----T-A-C-EV----A----------E-ISY
FPEGHMEQLEASMHQGLEQQMPSFNLPSKILCKVINIQRRAEPETDEVYAQITLLPELDQ
       ||          |    | |  ||      |  |         | |       
--K-KFRQL-------I--QV---N-PD-ILMR-LSAQ-MA--R--RL--QVT-------
SEPTSPDAPVQEPEKCTVHSFCKTLTASDTSTHGGFSVLRRHADDCLPPLDMSQQPPWQE
||       |          |   |   |  |  |     | |   |  |    | |   
SE--K----V----G-NL-AF---L---DV-T--G-----RIA-QTL--LNLAKQ-P--D
LVATDLHNSEWHFRHIFRGQPRRHLLTTGWSVFVSSKKLVAGDAFIFLRGENEELRVGVR
  |           |     |       |        |       |  |    |   |  
--A--M--T-----H-----P------DGMQ--I---K-------I-TR---QE--IG--
RHMRQQTNIPSSVISSHSMHIGVLATAAHAITTGTIFSVFYKPRTSRSEFIVSVNRYLEA
     |  |   |        |                       || |    | |    
-----Q--I---V--------G-------C---------------SR-E---TVGR-I--
KTQKLSVGMRFKMRFEPEKRFSGTIVGVQENKSSVWHDSEWRSLKVQWDEPSSVFRPERV
    |      ||  |                |   |        |       |      
----L------KM-LE-D-Q-N--L--I----SA--H-G--KTI-V-------VY-----
SPWELEPL
        
G-------
4ldx 1ber  110  668  199  16.47
DALCRELWHACAGPLVTLPREGERVYYFPEGHMEQLEASMHQGLEQQMPSFNLPSKILCK
 |   | |    |     |       |  | |      |     | |        |   |
-A---E-W---SGEYIS-P-------Y-AE-H-GK-K-S-----E-Q-----V--K---K
VINIQRRAEPETDEVYAQITLLPELDQSEPTSPDAPVQEPEKCTVHSFCKTLTASDTSTH
   |       |  |   |   | |                |  |    | ||  |  | 
---I-------T--V-S-I---P-L----------------K--V--L-KILT--DERT-
GGFSVLRRHADDCLPPLDMSQQPPWQELVATDLHNSEWHFRHIFRGQPRRHLLTTGWSVF
      ||                 |  |     |              ||   |     
------RR-----------------Q--V-----N------NL------RH--AT-----
VSSKKLVAGDAFIFLRGENEELRVGVRRHMRQPSSVISSHSMHIGVLATAAHAITTGTIF
  |  |    |  ||         |      ||             |     |       
-NS-ELLC-EA--FL---H-AF-TG------QP-------------LPD--DA----DL-
SVFYKPRTSRSEFIVSVNRYLEAKTQKLSVGMRFKMRFEGKRFSGTIVGVQENKSSVWHD
    | | |  | |       ||   |    ||  |        | |     |    |  
R---KER-S-DE-I-P-----EA-A-K-EI-MR-EM--------G-I-----NPET-W--
SEWRSLKVQWDEPSSVFRPERVSPWELEPLNLSDALCRELWHACAGPLVTLPREGERVYY
 |       |   |     |  ||          |   |  |   |         | |  
-EY-A---EW---SG----EYISPY---------A---E--H---G------KKSEQV--
FPEGHMEQLEASMHQGLEQQMPSFNLPSKILCKVINIQRRAEPETDEVYAQITLLPELDQ
           |         |   |  | | | |         |||     |       
------KKITVS----I----P---L--KVL-K-I-L-------TDE---R-T------R
SEPTSPDAPVQEPEKCTVHSFCKTLTASDTSTHGGFSVLRRHADDCLPPLDMSQQPPWQE
          |      |                    | |||         |      |
-R--------Q------V--------------N---N-L-RHA------TN-S------E
LVATDLHNSEWHFRHIFRGQPRRHLLTTGWSVFVSSKKLVAGDAFIFLRGENEELRVGVR
|    |   |  | | | |||    |              | |    ||    |      
L----L--CE-AFLHAFTGQP----L----P---DD----A-D----LR---KE------
RHMRQQTNIPSSVISSHSMHIGVLATAAHAITTGTIFSVFYKPRTSRSEFIVSVNRYLEA
   |           |                   |      |     |          |
---R-----------S-D----------E------I------P-----E---A------A
KTQKLSVGMRFKMRFEPEKRFSGTIVGVQENKSSVWHDSEWRSLKVQWDEPSSVFRPERV
|       ||  |         | |     |                         ||  
K-E---I-MR-EM---------G-I-----N-------------------------PE--
SPWELEPL
  |  |  
T-W--E-Y
4ldx 1cma  122  668  208  18.26
DALCRELWHACAGPLVTLPREGERVYYFPEGHMEQLEASMHQGLEQQMPSFNLPSKILCK
    | |    |   |                                 |    |    |
--M-R-LF-GYA--RVSTSQQSLDI-QV-RA-LKDAGVKANR-IFTDKAS-G-SSSDR-K
VINIQR-RAEPETDEVYAQITLLPELDQ-SEPTSPDAPVQEPEKCTVHSFCKTLTASDTS
     |   | | | |   | |   ||     |  |   |         |       |  
GLDLLRMKVE-EGD-V---I-LVKKLDRLGRDTA-DM-IQ-----LIKEF-------D-A
THGGFSVLRRHADDCLPPLDMSQQPPWQELVATDLHNSEWHFRHIFRGQPRRHLLTTGWS
   | |   |  ||     |          | | |  |            |   |     
-Q-GVSI--RFIDDGI-STD-GEM---GKMVVTIL--S----A-VAQAE-RQRILER-TN
VFVSSKKLVAGDAFIFLRGENEELRVGVRRHMRQPSSVISSHSMHIGVLATAAHAITTGT
         |     |  |     |    |       |        | |  | | |   |
--EGRQEAMA-KGVVF--G-----R---KRKIDR-DAVLNMW-QQ-G-LG-ASH-ISK-T
IFSVFYKPRTSRSEFIVSVNRYLEAKTQKLSVGMRFKMRFEGKRFSGTIVGVQENKSSVW
        | |     |  |   |      |  ||    | |         |    |   
M-NI---AR-S-TVYKV-IN---E------S-NMR--L-F-G--YA-R---V----ST--
HDSEWRSLKVQWDEPSSVFRPERVSPWELEPLNLSDALCRELWHACAGPLVTLPREGERV
  |   ||  |      |    |             ||        ||  |       | 
--SQ-QSLDIQ------V----R-------------AL-KD-----AG--V---K-ANRI
YYFPEGHMEQLEASMHQGLEQQMPSFNLPSKILCKVINIQRRAEPETDEVYAQITLLPEL
  |          |   ||        |      ||       | | | |   | |   |
--FTD-KASG-SSSDRKGLD--L----L--R-M-KV-------E-EGD-V---I-LVKKL
DQ-SEPTSPDAPVQEPEKCTVHSFCKTLTASDTSTHGGFSVLRRHADDCLPPLDMSQQPP
|     |  |   |         |       |     | |   |   |     |      
DRLGRDTA-DM-IQ-----LIKEF-------D-A-Q-GVSI--RFI-D-----D-G----
WQELVATDLHNSEWHFRHIFRGQPRRHLLTTGWSVFVSSKKLVAGDAFIFLRGENEELRV
      ||    |        |        |      |    ||  |      |    | 
----ISTD---GE-----M--G---K-MVVT---I-LSA---VA-QA------E-RQ-RI
GVRRHMRQQTNIPSSVISSHSMHIGVLATAAHAITTGTIFSVFYKPRTSRSEFIVSVNRY
      |  ||             |       |   |    ||   |  |   |    | 
-L--E-R--TN-----------E-G----RQEAMAKG-V--VF--GR-KR-K-I---DR-
LEAKTQKLSVGMRFKMRFEPEKRFSGTIVGVQENKSSVWHDSEWRSLKVQWDEPSSVFRP
  |      |     |         |   |      |  | |            | |   
-DA------V-L--NM-WQ-Q----G-L-G-----AS--HIS--KTMNIA--R-STVYK-
ERVSPWELEPL
      |    
V-IN--E-SN-
4ldx 1gdt  128  668  366  19.16
DALCRELWHACAGPLVTLPREGERVYYFPEGHMEQLEASMHQGLEQQMPSFNLPSKILCK
         |      |            |   |          |     |     ||  
----K----A-S--F-T-----D------E---E--D-------E-----F-----IL-D
VINIQRRAEPETDEVYAQITLLPELDQSEPTSPDAPVQEPEKCTVHSFCKTLTASDTSTH
|    |   | |                  |            | |    ||        
V--V-RK-NP-T-----R--------R---T------------T-H----TL--------
GGFSVLRRHADDCLPPLDMSQQPPWQELVATDLHNSEWHFRHIFRGQPRRHLLTTGWSVF
                 |        |        |  |        |  |   |     
--Y--------------D--------E-I------S--HY--V----P-NH---T-----
VSSKKLVAGDAFIFLRGENEELRVGVRRHMRQPSSVISSHSMHIGVLATAAHAITTGTIF
                | |        || |              |              
----------------G-N-----SI-RH-R----------FR--V-----Y------L-
SVFYKPRTSRSEFIVSVNRYLEAKTQKLSVGMRFKMRFEGKRFSGTIVGVQENKSSVWHD
|   | |    |    |  | |       |          | |     |    |      
S---K-RL---EY---V--Y-E-------V--------D-K-F-----G----K------
SEWRSLKVQWDEPSSVFRPERVSPWELEPLNLSDALCRELWHACAGPLVTLPREGERVYY
     | |  |                   ||                 |       |  
-----L-VR-DD-------D--G-------NL---I-K-----------T------KV--
FPEGHMEQLEASMHQGLEQQMPSFNLPSKILCKVINIQRRAEPETDEVYAQITLLPELDQ
 |                   ||     |   |       |  | |  |   | |     
LP-------------------PS--I--K-R-K-FS----AD-E-D--Y---T-L-AI--
SEPTSPDAPVQEPEKCTVHSFCKTLTASDTSTHGGFSVLRRHADDCLPPLDMSQQPPWQE
       | |    |     |       |      |        |   | |         
-------A-V---KK----QFYR-----D--L---FQI------D---P-D-T----GRS
LVATDLHNSEWHFRHIFRGQPRRHLLTTGWSVFVSSKKLVAGDAFIFLRGENEELRVGVR
|  |    |    |   || |                       | |             
LIRT---QS----R---RG-P------------I-A-R----E-F-F-------------
RHMRQQTNIPSSVISSHSMHIGVLATAAHAITTGTIFSVFYKPRTSRSEFIVSVNRYLEA
 |                 |      |||   |          |  |  |       |  
KHFAEE-------------H------AAH---T-E--NA-W--R-DR--F----RKFL--
KTQKLSVGMRFKMRFEPEKRFSGTIVGVQENKSSVWHDSEWRSLKVQWDEPSSVFRPERV
    |  |                |        |     |    |     |     |   
----LAYG----I--D-D--Y---I--------S-YYEAE-EPMK-NL-TP-T---P-G-
SPWELEPL
        
N-YN-S--
4ldx 1ign   96  668  189  14.37
DALCRELWHACAGPLVTLPREGERVYYFPEGHMEQLEASMHQGLEQQMPSFNLPSKILCK
|                |               |  |      || |   |    |   |
D----------------L---------------E--E------LE-Q---F---AKTF-K
VINIQRRAEPETDEVYAQITLLPELDQSEPTSPDAPVQEPEKCTVHSFCKTLTASDTSTH
    |||           |                              | |        
----QRR-----------I------------------------------K-L--------
GGFSVLRRHADDCLPPLDMSQQPPWQELVATDLHNSEWHFRHIFRGQPRRHLLTTGWSVF
 ||                      |     |             |      |  |    
-GF----------------T-----Q---G-D----------V--G------LAMG----
VSSKKLVAGDAFIFLRGENEELRVGVRRHMRQPSSVISSHSMHIGVLATAAHAITTGTIF
    ||          | |            |                       | || 
----KL-------Y--G-N-DF--S------Q-----------------------T-TI-
SVFYKPRTSRSEFIVSVNRYLEAKTQKLSVGMRFKMRFEGKRFSGTIVGVQENKSSVWHD
        ||  |        ||    |         |  |           |       
--------SR--F--------EA----LN--L--S--F--K-----------N---M---
SEWRSLKVQWDEPSSVFRPERVSPWELEPLNLSDALCRELWHACAGPLVTLPREGERVYY
     ||     |      |    |    ||  ||   |             |   |   
C--K-LK-----P--LL--EK---W----LN--DA---E-------------RK-KR---
FPEGHMEQLEASMHQGLEQQMPSFNLPSKILCKVINIQRRAEPETDEVYAQITLLPELDQ
           |     |      |    |   |       |            | |  |
----------TS----IE----T-N----I--RVA-L----E-KS---F-----L-E-NQ
SEPTSPDAPVQEPEKCTVHSFCKTLTASDTSTHGGFSVLRRHADDCLPPLDMSQQPPWQE
  |||      | |         |                  |       |       | 
-KPTS------E-E---I-----TM------------I----A-------D-------Q-
LVATDLHNSEWHFRHIFRGQPRRHLLTTGWSVFVSSKKLVAGDAFIFLRGENEELRVGVR
     | | |                           |               |  |   
-----L-NME---------------------------K---------------E--V-I-
RHMRQQTNIPSSVISSHSMHIGVLATAAHAITTGTIFSVFYKPRTSRSEFIVSVNRYLEA
   |                                  |          |    ||    
---R----------------------------------V-W--------F---CNR----
KTQKLSVGMRFKMRFEPEKRFSGTIVGVQENKSSVWHDSEWRSLKVQWDEPSSVFRPERV
  |        |     |||    |     |                             
R-Q--------K-----EKR----I-----N-----------------------------
SPWELEPL
      | 
------P-
4ldx 1oct   89  668  131  13.32
DALCRELWHACAGPLVTLPREGERVYYFPEGHMEQLEASMHQGLEQQMPSFNLPSKILCK
                  |    |          |   |    |        | |     
----------------S-P----RI-------V-Q---S-ND-L-TE-AAYSL-S----R
VINIQRRAEPETDEVYAQITLLPELDQSEPTSPDAPVQEPEKCTVHSFCKTLTASDTSTH
    | |        |    |    ||              |   |         |    
--D-QKR----M--LY----LF--VDQ---------IR---K-S-H---------D----
GGFSVLRRHADDCLPPLDMSQQPPWQELVATDLHNSEWHFRHIFRGQPRRHLLTTGWSVF
 |          |                       |     |       |         
-G--I-------C-----------------------E-----I-------H---------
VSSKKLVAGDAFIFLRGENEELRVGVRRHMRQPSSVISSHSMHIGVLATAAHAITTGTIF
|   |  |    ||                              | | | | |       
V-A-K-YA-E--IF------------------------------G-L-TSAEA-------
SVFYKPRTSRSEFIVSVNRYLEAKTQKLSVGMRFKMRFEGKRFSGTIVGVQENKSSVWHD
|   |        |    |   |    |      |       |     |    |      
S---K------D-I----R--QA----L------K-----S-FA----G----K------
SEWRSLKVQWDEPSSVFRPERVSPWELEPLNLSDALCRELWHACAGPLVTLPREGERVYY
 |     |   |  | |      ||   |     |      |    |     | |    |
-E---V-VFY-E--S-F------PWFIKP-----A------H--S-P--S--R-G--L-Y
FPEGHMEQLEASMHQGLEQQMPSFNLPSKILCKVINIQRRAEPETDEVYAQITLLPELDQ
           | |       |    |       |  | |    |         | |   
-----------SVH--I--N-P-YLIP--FF---IGLQNRF---T-Q-F-R---LSE-TK
SEPTSPDAPVQEPEKCTVHSFCKTLTASDTSTHGGFSVLRRHADDCLPPLDMSQQPPWQE
 | | | |           | |      | |   |           |   |      |  
-EITNPYA-M----R-LYESLCQ-YRKPDGS---G--IV---S---L-KID------W--
LVATDLHNSEWHFRHIFRGQPRRHLLTTGWSVFVSSKKLVAGDAFIFLRGENEELRVGVR
         |   |     |     |    |           |   |        |   |
-I---I---E---R--Y--Q-----LPQ--S-Y---QRM-P-D---F--------R---R
RHMRQQTNIPSSVISSHSMHIGVLATAAHAITTGTIFSVFYKPRTSRSEFIVSVNRYLEA
|    |      |       |             |       |   |     |   | | 
RFL--Q--V--CV----N-EI-------N--SR-T-------P--MR---L-S---YIE-
KTQKLSVGMRFKMRFEPEKRFSGTIVGVQENKSSVWHDSEWRSLKVQWDEPSSVFRPERV
|  |   |     |         |            |        |      | ||    
K-KK---G-----R---Q-----T---------T--H------I-V-F----S-FR-D-I
SPWELEPL
        
T-------
4ldx 1rep  106  668  214  15.87
DALCRELWHACAGPLVTLPREGERVYYFPEGHMEQLEASMHQGLEQQMPSFNLPSKILCK
     |           |      |             |    ||               
-----E-----------L-----KV-------------S----LE---------------
VINIQRRAEPETDEVYAQITLLPELDQSEPTSPDAPVQEPEKCTVHSFCKTLTASDTSTH
      |     |                 |                | |          
----E-R-----D-LW--------------T----------R-----F-K----------
GGFSVLRRHADDCLPPLDMSQQPPWQELVATDLHNSEWHFRHIFRGQPRRHLLTTGWSVF
                          ||  |   | |                       
--------------------------EL--T---N-E---------------M-----I-
VSSKKLVAGDAFIFLRGENEELRVGVRRHMRQPSSVISSHSMHIGVLATAAHAITTGTIF
|   |             |     | || |  |  |    ||              |   
V-T-K-------------N-----G-RR-M-FP--VLKV-SM-------------SG-L-
SVFYKPRTSRSEFIVSVNRYLEAKTQKLSVGMRFKMRFEGKRFSGTIVGVQENKSSVWHD
     |             |    |    |            |    |    |     | 
D----P----N----AM--Y----T----V-L---L--D---F----VAA-DN-----H-
SEWRSLKVQWDEPSSVFRPERVSPWELEPLNLSDALCRELWHACAGPLVTLPREGERVYY
   |     |           |        |       | |       |  |  |     
---R-----W-K----Y----V--------N---G---E-W-------V--P--GGK---
FPEGHMEQLEASMHQGLEQQMPSFNLPSKILCKVINIQRRAEPETDEVYAQITLLPELDQ
 ||    |  |               ||   | |  |     |  |         |    
-PE---PQ--A---------------PS---C-VY-I----HP--D------S--PNFG-
SEPTSPDAPVQEPEKCTVHSFCKTLTASDTSTHGGFSVLRRHADDCLPPLDMSQQPPWQE
      | ||    |  |    | ||       ||                       | 
AH-WMKD-PVSF-SK--V----K-LT--N-KMNGG-----------------G-----Q-
LVATDLHNSEWHFRHIFRGQPRRHLLTTGWSVFVSSKKLVAGDAFIFLRGENEELRVGVR
     | ||  |        || |         |     | |       |          
IM---L-NS-LH-K--Y--EPRIH-------I-V---R-V-G-------G-T-Q------
RHMRQQTNIPSSVISSHSMHIGVLATAAHAITTGTIFSVFYKPRTSRSEFIVSVNRYLEA
   |              | |    |  |        | |  | |    ||  |  |   
---R--------------M-I----T-SH--------S-F--PET---QFI-AVTAY-Q-
KTQKLSVGMRFKMRFEPEKRFSGTIVGVQENKSSVWHDSEWRSLKVQWDEPSSVFRPERV
           |    |   |          |           |    |        || 
-NEEIT-AL--KIKHNP---FA---------K------A-F--L----D---A--K-ER-
SPWELEPL
        
N-------
4ldx 1xbr  100  668  184  14.97
-DALCRELWHACAGPLVTLPREGERVYYFPEGHMEQLEASMHQGLEQQMPSFNLPSKILC
 |    ||                 |    | | |    |    | |         |  |
LDKQ-KEL-D--S-KVRNV-K--DKVMCI-E-H-E-IK-SL-EDL-QD--EYDF--K--C
KVINIQRRAEPETDEVYAQITLLPELDQSEPTSPDAPVQE-PEKCTVHSFCKTLTASDTS
|    | | |           |   ||          |    |   |          |  
K--TLQNR-E-HL--LLKKMYLM--LD-NK-RK-EV-VHKIIELLNVTELTQNALINDEL
THGGFSVLRRHADDCL--PP-LDMSQQPPWQELVATDLHNSEWHFRHIFRGQPRRHLLTT
        ||    |   ||     |   |   ||  |                    | 
VE--WK--RRQQSACIGGPPNACLDQLQNWFTIVAESLQQVRQQLKKL-EELEQKY--TY
GWSVFVSSKKLVAGD-AF-IFLRGENEELRVGVRRHMRQPSSVISSHSMHIGVLATAAHA
         | |  |  |  |         | |    |||      |     || |    
EHDP-ITKNKQVLWDRTFSLFQQLIQSSF-V-V--E-RQP--CMPTHPQRPLVLKTGVQ-
ITTGTIFSVFYKPRTSRSEFIVSVNRYLEAKTQKLSV-GMRFKMRFEGKRFSGTIVGVQE
 |         |         | |            | | | |    |           |
FTV-KL-RLLVKLQELNYNLKVKV-LFDKDVNERNTVKGFR-KFNILGTH-T-KVMNMEE
NKSSVWHDSEWRSLKVQWDEPSSVFRPERVSPWELEPLNLSDALCRELWHACAGPLVTLP
         | | |     |        |    |  ||        || |        | 
STNGSL-AAEFRHLQLK--EQKNA--GTRTN--E-GPL-I---VTEEL-HSLSFE-TQLC
REGERVYYFPEGHMEQLEASMHQGLEQQMPSFNLPSKILCKVINIQRRAEPETDEVYAQI
  |  |    |     |          | ||    | ||    |    |||         
QPG-LVIDL-E--TTSLPVVVISNV-SQLPS-GWAS-ILW--YNML-VAEPRNLSFF--L
TLLPELDQSEPTSPDAPVQEPEKCTVHSFCKTLTASDTSTHGGFSVLRRHAD-DCLPPLD
|  |        |    |       |      |   |     |   |   |  | | |  
T--PPCARWAQLS-E--VLSWQFSSV-T-KRGLNV-DQLNMLGEKLLGPNASPDGLIP--
MSQQPPWQELVATDLHNSEW-HFRHIFRGQPRRHLLTTGWSVFVSSKKLVAGDAFIFLRG
        |    |     |     |       |||   |           |  ||    
WTRF--CKENI-NDKNFPFWLWIESILE-LIKKHLLPL-WN---DG--CIMG--FI-SK-
ENEELRVGVRRHMRQQTNIPSSVISSHSMHIGVLATAAHAITTGTIFSVFYKPRTSRSEF
|  | |         |   |       |           |||  |   |          |
E-RE-R-AL---LKDQ-Q-PGTFLLRFS-E-S--SREG-AITF-T-W-VERSQNGGEPDF
IVSVNRYLEAKTQKLSVGMRFKMRFEPEKRFSGTIVGVQENKSSVWHDSEWRSLKVQWDE
   |  |   |   ||    |                  ||                 | 
-HAVEPY--TK-KELS-AVTFP---DIIRNYK--VMAA-ENIPE--NPLKYLYPNIDKDH
PSSVFRPERVSPWELEPL-
             ||    
AFGKYYSRGIKT-ELISVS
4ldx 1bf5  131  668  544  19.61
DALCREL-WHACAGPLVTLPREGERVYYFPEGHMEQLEASMHQGLEQQMPSFNLPSKILC
  |   | | | || |     |     |          |    |          | | | 
--LSGRLNWQALAG-LKASGAE-QNL-Y----NV--FNA-VFEGTKYVL--YEKP-KHL-
KVINIQRRAEPETDEVYAQITLLPELDQSEPTSPDAPVQEPEKCTVHSFCKTLTASDTST
|  |            |||   ||  |       |      |      |   |   | ||
K--NL-----------YAQV-VLP--D-------DV-I-K-E---I--F-NPL-I-DLST
HGGFSVLRRHADDCLPPLDMSQQPPWQELVATDLHNSEWHFRHIFRGQPRRHLLTTGWSV
                    |  |      |    | | |    | |   |     ||  
----T---QWG--------VS--PAF----A--IENTETH-KILF-GEIKRQ---DGW--
FVSSKKLVAGDAFIFLRGENEELRVGVRRHMRQPSSVISSHSMHIGVLATAAHAITTGTI
 |  |   ||      ||   | |         |          ||        |     
-VEGKDPSAG------RGNAHE-R-SC-K-LFTP-GLLKAYRT-IGGI-N-DEEI-L-P-
FSVFYKPRTSRSEFIVSVNRYLEAKTQKLSVGMRFKMRFEGKRFSGTIVGVQENKSSVWH
| |           |    |    |     |  |    |            | |    | 
FWVVFE-----GD-I-T--R--DPK--R--V--R-EITF-W--YD----HYQDN-YFMWR
DSEWRSLKVQWDEPSSVFRPERVSPWELEPLNLSDALCRELWHACAGPLVTLPREGERVY
  |    |         |  |      |    ||  |    | | || |     |     
PNE-SGEKLV--Q--H-FN-EKLKKY-LDKSELSGRL--N-WQALAG-LKASGAE-QNL-
YFPEGHMEQLEASMHQGLEQQMPSFNLPSKILCKVINIQRRAEPETDEVYAQITLLPELD
|          |    |          | | | |  |            |||   ||  |
Y----NV--FNA-VFEGTKYVL--YEKP-KHL-K--NL-----------YAQV-VLP--D
QSEPTSPDAPVQEPEKCTVHSFCKTLTASDTSTHGGFSVLRRHADDCLPPLDMSQQPPWQ
       |      |      |   |   | ||                    |  |   
-------DV-I-K-E---I--F-NPL-I-DLST----T---QWG--------VS--PAF-
ELVATDLHNSEWHFRHIFRGQPRRHLLTTGWSVFVSSKKLVAGDAFIFLRGENEELRVGV
   |    | | |    | |   |     ||   |  |   ||      ||   | |   
---A--IENTETH-KILF-GEIKRQ---DGW---VEGKDPSAG------RGNAHE-R-SC
RRHMRQQTNIPSSVISSHSMHIGVLATAAHAITTGTIFSVFYKPRTSRSEFIVSVNRYLE
       |  |          ||        |     | |           |    |   
-K-L--FT--P-GLLKAYRT-IGGI-N-DEEI-L-P-FWVVFE-----GD-I-T--R--D
AKTQKLSVGMRFKMRFEPEKRFSGTIVGVQENKSSVWHDSEWRSLKVQWDEPSSVFRPER
 |     |  |    |             | |    |   |    |         |  | 
PK--R--V--R-EITFWYD-HY-------QDN-YFMWRPNE-SGEKLV--Q--H-FN-EK
VSPWELEPL
     |   
LKKY-LD--
4ldx 1d02  138  668  397  20.66
DALCRELWHACAGPLVTLPREGERVYYFPEGHMEQLEASMHQGLEQQMPSFNLPSKILCK
     |    ||   |          |   |         | |      |        ||
--M-KETRY-CA---V-C---ND---Y-ASGY--------HYGV---W-S--CEG---CK
VINIQRRAEPETDEVYAQITLLPELDQSEPTSPDAPVQEPEKCTVHSFCKTLTASDTSTH
     |      |  |      |   |   |  |       |    | |    |      
AF-FKRSIQGHND--Y----MCPATNQC--TI-D---KNRRK----S-CQ---A----CR
GGFSVLRRHADDCLPPLDMSQQPPWQELVATDLHNSEWHFRHIFRGQPRRHLLTTGWSVF
     ||     |     |         |  |   |     |   |          ||  
-----LRK----CY-EVGM-MKTRYC-AVCND-YAS--GY-H-Y-G------V---WS--
VSSKKLVAGDAFIFLRGENEELRVGVRRHMRQPSSVISSHSMHIGVLATAAHAITTGTIF
    |     || | |        |   |            |     ||        || 
CEGCK-----AF-FKR--S--IQ-G---H--------NDY-M-C-P-AT--N--QC-TI-
SVFYKPRTSRSEFIVSVNRYLEAKTQKLSVGMRFKMRFEGKRFSGTIVGVQENKSSVWHD
    | |  |        | |  |     |||  ||  |  |     |    |      |
D---KNR--RKS-CQAC-R-LR-KCYE--VGM-MKMK-E-TRYC-A-V-C--N------D
SEWRSLKVQWDEPSSVFRPERVSPWELEPLNLSDALCRELWHACAGPLVTLPREGERVYY
             |       |  |       |   | |    |                
--Y-A--------SG-YH-YGV--W-------S---C-E---GC------------KA-F
FPEGHMEQLEASMHQGLEQQMPSFNLPSKILCKVINIQRRAEPETDEVYAQITLLPELDQ
|          |  ||        |      |          | |     | |     | 
F-----KR---SI-QG---H----N--D-YMC----------PATN----QCT----IDK
SEPTSPDAPVQEPEKCTVHSFCKTLTASDTSTHGGFSVLRRHADDCLPPLDMSQQPPWQE
    |     |    |     |            |          |              
NRRKS--C--Q---ACRLRK-C--Y---E--V--G--MMKKETRYC------A-------
LVATDLHNSEWHFRHIFRGQPRRHLLTTGWSVFVSSKKLVAGDAFIFLRGENEELRVGVR
 |  |   |     |   |          ||      |     || | |        |  
-VCND-YAS--GY-H-Y-G------V---WS--CEGCK-----AF-FKR--S--IQ-G--
RHMRQQTNIPSSVISSHSMHIGVLATAAHAITTGTIFSVFYKPRTSRSEFIVSVNRYLEA
  |      |              ||        ||     | |  |     |      |
DYM-----CP--------------AT--N--QC-TI-D---KNR--R-K---S----CQA
KTQKLSVGMRFKMRFEPEKRFSGTIVGVQENKSSVWHDSEWRSLKVQWDEPSSVFRPERV
    |    | |     |       ||                 |               
-C-RL----R-KC-Y--E-------VG-------M--------MK---------------
SPWELEPL
        
--------
4ldx 1hcq  116  668  290  17.37
DALCRELWHACAGPLVTLPREGERVYYFPEGHMEQLEASMHQGLEQQMPSFNLPSKILCK
 ||        |          |  | |       |      |         | |    |
-ALTK------A-EM-S-----E--YLF-----DKL------G---------L-S----K
VINIQRRAEPETDEVYAQITLLPELDQSEPTSPDAPVQEPEKCTVHSFCKTLTASDTSTH
      |     |   |      ||           |   |      |            
------R-----D---AK-----EL-----------V---E---L--F------------
GGFSVLRRHADDCLPPLDMSQQPPWQELVATDLHNSEWHFRHIFRGQPRRHLLTTGWSVF
  |   || |      |         |       | |               |  |   |
--FEEIRR-A------L---------E-------NGE---Q-V------K--L-SG---F
VSSKKLVAGDAFIFLRGENEELRVGVRRHMRQPSSVISSHSMHIGVLATAAHAITTGTIF
        |  |  ||  |   | |  |    |                      ||   
--------GN-F-DLRDKN-Q-RPG--RN---P-------K--------------TGE--
SVFYKPRTSRSEFIVSVNRYLEAKTQKLSVGMRFKMRFEGKRFSGTIVGVQENKSSVWHD
     | | |    | |       |            |   |      | |  |      
DI---PITAR-R--V-V-------T------------F---R---P--G-Q--K------
SEWRSLKVQWDEPSSVFRPERVSPWELEPLNLSDALCRELWHACAGPLVTLPREGERVYY
     ||       |     ||     |  |           |   |  |     |    
-----LK-------S-----RV-----E--N-----------A-S-PKMT--K-SE-L--
FPEGHMEQLEASMHQGLEQQMPSFNLPSKILCKVINIQRRAEPETDEVYAQITLLPELDQ
      | | |       ||  |   |     |          | |   |      |   
-----IERL-AT------QQ--S-HIPA----K--TV------E-D---A-V---KEM--
SEPTSPDAPVQEPEKCTVHSFCKTLTASDTSTHGGFSVLRRHADDCLPPLDMSQQPPWQE
             |    |       |   ||      |   |           |    |
---------L---E----H-----M-A---ST------L---A-----------Q---GE
LVATDLHNSEWHFRHIFRGQPRRHLLTTGWSVFVSSKKLVAGDAFIFLRGENEELRVGVR
         |     | ||         | | |  |  |         |      | |  
---R-I---E-----I-RG------F--G-S-F--S--L-----H-Y-RA---P-RTG--
RHMRQQTNIPSSVISSHSMHIGVLATAAHAITTGTIFSVFYKPRTSRSEFIVSVNRYLEA
   |   | |                      ||       |      |        || 
---R---N-P-------K--------------TG---D---K--V---E--------LE-
KTQKLSVGMRFKMRFEPEKRFSGTIVGVQENKSSVWHDSEWRSLKVQWDEPSSVFRPERV
       |   |    |   |     |    |       |   |    |           
-------G---K--YVP--HFK-P--G----K-------E---LR---DR-ANIY-----
SPWELEPL
        
G-------
4ldx 1ihf  114  668  190  17.07
DALCRELWHACAGPLVTLPREGERVYYFPEGHMEQLEASMHQGLEQQMPSFNLPSKILCK
                              | |     |        || ||     |  
-----------------M-----K------G-M-----S-------KMPQFN-----L--
VINIQRRAEPETDEVYAQITLLPELDQSEPTSPDAPVQEPEKCTVHSFCKTLTASDTSTH
      |                            |    |                   
------R--------W-------------------P-R--E-------------------
GGFSVLRRHADDCLPPLDMSQQPPWQELVATDLHNSEWHFRHIFRGQPRRHLLTTGWSVF
    |           ||         ||                    |          
----V-----------LD---------LV--------------------R----------
VSSKKLVAGDAFIFLRGENEELRVGVRRHMRQPSSVISSHSMHIGVLATAAHAITTGTIF
    | ||         ||     |     |   ||    |                 | 
----K-VA-E-------EN-----G-----R---SV---NS----------E------I-
SVFYKPRTSRSEFIVSVNRYLEAKTQKLSVGMRFKMRFEGKRFSGTIVGVQENKSSVWHD
   |     |      |    |      |    ||   || |    | |    |      
---Y--Q--R------V---ME------S----FK-K-EG-R----I-GM---K-GM---
SEWRSLKVQWDEPSSVFRPERVSPWELEPLNLSDALCRELWHACAGPLVTLPREGERVYY
    | |     |   |             |    | |  |          ||  | |  
----S-KM----P-Q-F-------------N----L-R--W----------PR--E-V--
FPEGHMEQLEASMHQGLEQQMPSFNLPSKILCKVINIQRRAEPETDEVYAQITLLPELDQ
                |             |  |    |        |            
----------------LD------------L--V----RK-------V------------
SEPTSPDAPVQEPEKCTVHSFCKTLTASDTSTHGGFSVLRRHADDCLPPLDMSQQPPWQE
       |   | |                    |     |           |       
-------A---E-E------------------N-G-----R-----------S-------
LVATDLHNSEWHFRHIFRGQPRRHLLTTGWSVFVSSKKLVAGDAFIFLRGENEELRVGVR
 |     |||     |   |                                   |  | 
-V-----NSE-----IY--Q-----------------------------------R--V-
RHMRQQTNIPSSVISSHSMHIGVLATAAHAITTGTIFSVFYKPRTSRSEFIVSVNRYLEA
  |                                  | | |                  
--M--E-------------------------------S-F-K------------------
KTQKLSVGMRFKMRFEPEKRFSGTIVGVQENKSSVWHDSEWRSLKVQWDEPSSVFRPERV
|      |           |    | |                                 
K-E----G-----------R----I-G---------------------------------
SPWELEPL
        
A-------
4ldx 1par   81  668  105  12.13
DALCRELWHACAGPLVTLPREGERVYYFPEGHMEQLEASMHQGLEQQMPSFNLPSKILCK
                |  | | ||              |    |     |    | |  
----------------T--R-G-RV---------KIK--M----E-----F-IDNK-L--
VINIQRRAEPETDEVYAQITLLPELDQSEPTSPDAPVQEPEKCTVHSFCKTLTASDTSTH
     ||        |              |            |   | |        | 
-----RR--------Y--------------T------------T---FSK------RKT-
GGFSVLRRHADDCLPPLDMSQQPPWQELVATDLHNSEWHFRHIFRGQPRRHLLTTGWSVF
 |       |                ||  | |            |        |     
-G--IMKK-A--------------Y-EL-ST-L--T---------G--------T--Q--
VSSKKLVAGDAFIFLRGENEELRVGVRRHMRQPSSVISSHSMHIGVLATAAHAITTGTIF
|    |        |      |             |  |     |      |        
V----L--------L------L-------------V-ASET---G------H--------
SVFYKPRTSRSEFIVSVNRYLEAKTQKLSVGMRFKMRFEGKRFSGTIVGVQENKSSVWHD
 | |   |    |         | | ||       |       | |  |    |      
-V-Y---T----F---------A-TRKL----Q-PM-I---T-SET--G----K------
SEWRSLKVQWDEPSSVFRPERVSPWELEPLNLSDALCRELWHACAGPLVTLPREGERVYY
     |  |                           |  |      |  |  | | ||  
----AL-IQ-----------------------T---C--L-N--S-P-DT--R-G-RV--
FPEGHMEQLEASMHQGLEQQMPSFNLPSKILCKVINIQRRAEPETDEVYAQITLLPELDQ
            |    |     |    | |       ||        |           
-------KIK--M----E-----F-IDNK-L-------RR--------Y-----------
SEPTSPDAPVQEPEKCTVHSFCKTLTASDTSTHGGFSVLRRHADDCLPPLDMSQQPPWQE
   |            |   | |        |  |       |                |
---T------------T---FSK------RKT--G--IMKK-A--------------Y-E
LVATDLHNSEWHFRHIFRGQPRRHLLTTGWSVFVSSKKLVAGDAFIFLRGENEELRVGVR
|  | |            |        |   |      ||   |         |      
L-ST-L--T---------G--------T--QVLL----LV---A-------S-E------
RHMRQQTNIPSSVISSHSMHIGVLATAAHAITTGTIFSVFYKPRTSRSEFIVSVNRYLEA
      |              |      |         | |   |    |         |
------T--------------G------H---------V-Y---T----F---------A
KTQKLSVGMRFKMRFEPEKRFSGTIVGVQENKSSVWHDSEWRSLKVQWDEPSSVFRPERV
 | ||       |    |     |  |    |           |  |             
-TRKL----Q-PM-ITSE-----T--G----K----------AL-IQ-------------
SPWELEPL
       |
T---C--L
4ldx 1srs  102  668  164  15.27
DALCRELWHACAGPLVTLPREGERVYYFPEGHMEQLEASMHQGLEQQMPSFNLPSKILCK
                                                            
------------------------------------------------------------
VINIQRRAEPETDEVYAQITLLPELDQSEPTSPDAPVQEPEKCTVHSFCKTLTASDTSTH
                  |                                         
------------------I-----------------------------------------
GGFSVLRRHADDCLPPLDMSQQPPWQELVATDLHNSEWHFRHIFRGQPRRHLLTTGWSVF
                   |   | |   |                   |          
-------------------S---P-Q---A-------------------R----------
VSSKKLVAGDAFIFLRGENEELRVGVRRHMRQPSSVISSHSMHIGVLATAAHAITTGTIF
          |  ||     |          |                            
----------A--FL-----E----------Q----------------------------
SVFYKPRTSRSEFIVSVNRYLEAKTQKLSVGMRFKMRFEGKRFSGTIVGVQENKSSVWHD
 ||      |        |    | |                 |        |       
-VF------R--------R----K-Q-----------------S--L-----N-------
SEWRSLKVQWDEPSSVFRPERVSPWELEPLNLSDALCRELWHACAGPLVTLPREGERVYY
    | |                               |              | | |  
----S-K-------------------------------E-------------KE-E-V--
FPEGHMEQLEASMHQGLEQQMPSFNLPSKILCKVINIQRRAEPETDEVYAQITLLPELDQ
          |                     |                           
----------A---------------------K---------------------------
SEPTSPDAPVQEPEKCTVHSFCKTLTASDTSTHGGFSVLRRHADDCLPPLDMSQQPPWQE
              |      |            |             ||        | 
--------------K------C------------G--I----T-----PL--------Q-
LVATDLHNSEWHFRHIFRGQPRRHLLTTGWSVFVSSKKLVAGDAFIFLRGENEELRVGVR
 |           |               |                              
-V-----------R-V-------------W------------------------------
RHMRQQTNIPSSVISSHSMHIGVLATAAHAITTGTIFSVFYKPRTSRSEFIVSVNRYLEA
                                                 ||   |     
-------------------------------------------------FI---N-----
KTQKLSVGMRFKMRFEPEKRFSGTIVGVQENKSSVWHDSEWRSLKVQWDEPSSVFRPERV
   |     |  |                                             | 
---K-----R--M---------------------------------------------R-
SPWELEPL
|       
S-------
4ldx 1yrn   44  668   49   6.59
DALCRELWHACAGPLVTLPREGERVYYFPEGHMEQLEASMHQGLEQQMPSFNLPSKILCK
     |         |    | |    |        ||      |       | ||   |
--M--E---------V----EKE----F----ITD-EA---K--E--L----L-SK--DK
VINIQRRAEPETDEVYAQITLLPELDQSEPTSPDAPVQEPEKCTVHSFCKTLTASDTSTH
   ||  |     ||    |           |   |   |   |  |  || |     | 
-L-IQ-QA---YNEV--K-T---SI-----CS---PIW-P--AT--S--KTFTI-N-NT-
GGFSVLRRHADDCLPPLDMSQQPPWQELVATDLHNSEWHFRHIFRGQPRRHLLTTGWSVF
               |           |   |  |  |  |      |            
------EKNCNGVV-PI---KELCY-TLL-EDTYN--W-YRE--K--P------------
VSSKKLVAGDAFIFLRGENEELRVGVRRHMRQPSSVISSHSMHIGVLATAAHAITTGTIF
     |   |  | |      |                      |           | | 
-----L---D--I-LK-----LE---KK--K-------------G-----------GPI-
SVFYKPRTSRSEFIVSVNRYLEAKTQKLSVGMRFKMRFEGKRFSGTIVGVQENKSSVWHD
 | ||      |||   |   | |     |||     ||      |  |   | ||  | 
DV-YK------EFI-E-NS--ELK--R--VGM--E--FE------T--G---NISSA-H-
SEWRSLKVQWDEPSSVFRPERVSPWELEPLNLSDALCRELWHACAGPLVTLPREGERVYY
   ||                     |  | |   |     |            ||    
---RSM--------N-----K-----L--L-L--GL-K---H------------GE-I--
FPEGHMEQLEASMHQGLEQQMPSFNLPSKILCKVINIQRRAEPETDEVYAQITLLPELDQ
        | |     |   |     |  |  |    |  |       |        |  
------D-L-AII---L---M-----P--I--K----Q-LA-------Y-----Y--L--
SEPTSPDAPVQEPEKCTVHSFCKTLTASDTSTHGGFSVLRRHADDCLPPLDMSQQPPWQE
   |  |          |             |   |             |      |  |
---T--D-------R--V-------------TN--F-------EE----L----E-PYFE
LVATDLHNSEWHFRHIFRGQPRRHLLTTGWSVFVSSKKLVAGDAFIFLRGENEELRVGVR
|  |     |        |||           |        |    |    | |      
L--T-----E--------GQP--------F-IF------I-G----F----NAE----A-
RHMRQQTNIPSSVISSHSMHIGVLATAAHAITTGTIFSVFYKPRTSRSEFIVSVNRYLEA
       |         |                    |   |                 
-Y-----N---------S-------------------NV---P-----------------
KTQKLSVGMRFKMRFEPEKRFSGTIVGVQENKSSVWHDSEWRSLKVQWDEPSSVFRPERV
    |           | |       |               |     |           
----L-I---------P-K-------G---------------S-----D-----------
SPWELEPL
        
G------M
4ldx 1bhm  111  668  198  16.62
DALCRELWHACAGPLVTLPREGERVYYFPEGHMEQLEASMHQGLEQQMPSFNLPSKILCK
   |      |            |                   |        |  |  | 
EQAC-DI---C------------R-------------------L-KK-----L--K--C-
VINIQRRAEPETDEVYAQITLLPELDQSEPTSPDAPVQEPEKCTVHSFCKTLTASDTSTH
                            |          | |      |    |      
--S---K---------------------E---------KP-K------C----A------
GGFSVLRRHADDCLPPLDMSQQPPWQELVATDLHNSEWHFRHIFRGQPRRHLLTTGWSVF
            |   |                 |  |  |      |      |     
-------K----C---L---------K-------NN-WECR--Y--SP-K----T-----
VSSKKLVAGDAFIFLRGENEELRVGVRRHMRQPSSVISSHSMHIGVLATAAHAITTGTIF
    |          |                |             | | ||        
----K----------R--S-------------P-------------L-TRAH--------
SVFYKPRTSRSEFIVSVNRYLEAKTQKLSVGMRFKMRFEGKRFSGTIVGVQENKSSVWHD
                    |   |             |          | |        
--------------------L---T-------------E----------V-E--------
SEWRSLKVQWDEPSSVFRPERVSPWELEPLNLSDALCRELWHACAGPLVTLPREGERVYY
|  | |             ||     ||      | |      |            |   
S--R-L-------------ER-----LE-----QA-C-DI---C------------R---
FPEGHMEQLEASMHQGLEQQMPSFNLPSKILCKVINIQRRAEPETDEVYAQITLLPELDQ
                |        |  |  |                            
----------------L-KK-----L--K--C---S---K--------------------
SEPTSPDAPVQEPEKCTVHSFCKTLTASDTSTHGGFSVLRRHADDCLPPLDMSQQPPWQE
 |          | |      |    |                  |   |          
-E---------KP-K------C----A-------------K----C---L---------K
LVATDLHNSEWHFRHIFRGQPRRHLLTTGWSVFVSSKKLVAGDAFIFLRGENEELRVGVR
       |  |  |      |      |         |                      
-------NN-WECR--Y--SP-K----T---------K----------------------
RHMRQQTNIPSSVISSHSMHIGVLATAAHAITTGTIFSVFYKPRTSRSEFIVSVNRYLEA
   |     |             | | ||                            |  
---R---S-P-------------L-TRAH----------------------------L--
KTQKLSVGMRFKMRFEPEKRFSGTIVGVQENKSSVWHDSEWRSLKVQWDEPSSVFRPERV
 |               |         | |        |  | |             || 
-T---------------E---------V-E--------S--R-L-------------ER-
SPWELEPL
       |
-------L
4ldx 1d66   76  668  114  11.38
DALCRELWHACAGPLVTLPREGERVYYFPEGHMEQLEASMHQGLEQQMPSFNLPSKILCK
                     | |    |        |                      
---------------------G-R----P-----R--A----------------------
VINIQRRAEPETDEVYAQITLLPELDQSEPTSPDAPVQEPEKCTVHSFCKTLTASDTSTH
 ||                                              |          
-IN----------------------------------------------K----------
GGFSVLRRHADDCLPPLDMSQQPPWQELVATDLHNSEWHFRHIFRGQPRRHLLTTGWSVF
                                 |  |         |             
---------------------------------H--E---------Q-------------
VSSKKLVAGDAFIFLRGENEELRVGVRRHMRQPSSVISSHSMHIGVLATAAHAITTGTIF
                    |          |                            
--------------------E----------Q----------------------------
SVFYKPRTSRSEFIVSVNRYLEAKTQKLSVGMRFKMRFEGKRFSGTIVGVQENKSSVWHD
             | |  | |      |          | |       |         | 
-------------I-S--R-L------L----------E-K-------G---------H-
SEWRSLKVQWDEPSSVFRPERVSPWELEPLNLSDALCRELWHACAGPLVTLPREGERVYY
                  | |                  |    |               
------------------P-R------Q----------QL----A---I--------I--
FPEGHMEQLEASMHQGLEQQMPSFNLPSKILCKVINIQRRAEPETDEVYAQITLLPELDQ
|              |                                   |        
F--------------G-----------------------------------I--------
SEPTSPDAPVQEPEKCTVHSFCKTLTASDTSTHGGFSVLRRHADDCLPPLDMSQQPPWQE
                                  |  |              |       
----------------------------------G--V--------------S-------
LVATDLHNSEWHFRHIFRGQPRRHLLTTGWSVFVSSKKLVAGDAFIFLRGENEELRVGVR
   | |                |                       |             
---T-L----------Y-----R---------------------Y-F-------------
RHMRQQTNIPSSVISSHSMHIGVLATAAHAITTGTIFSVFYKPRTSRSEFIVSVNRYLEA
         |                   |               | |  |         
---------P-------------------A---------------S-S--I---------
KTQKLSVGMRFKMRFEPEKRFSGTIVGVQENKSSVWHDSEWRSLKVQWDEPSSVFRPERV
|  |     |  |                 |                             
K--K-----R--M-----------------N-----------------------------
SPWELEPL
        
--------
4ldx 1hcr   45  668   52   6.74
DALCRELWHACAGPLVTLPREGERVYYFPEGHMEQLEASMHQGLEQQMPSFNLPSKILCK
                |                                      |   |
-----------S----T--------------------------------------K---K
VINIQRRAEPETDEVYAQITLLPELDQSEPTSPDAPVQEPEKCTVHSFCKTLTASDTSTH
         |         |      | |        |             |   |    
------K--P--------LT------Q-E--------Q-------------L--ED----
GGFSVLRRHADDCLPPLDMSQQPPWQELVATDLHNSEWHFRHIFRGQPRRHLLTTGWSVF
      ||        |            |            |                 
---A--RR--------L---------K--A------------IY--E-------------
VSSKKLVAGDAFIFLRGENEELRVGVRRHMRQPSSVISSHSMHIGVLATAAHAITTGTIF
   ||             | ||                      | |             
---KK----------K--N-EL----------------------G-L-------------
SVFYKPRTSRSEFIVSVNRYLEAKTQKLSVGMRFKMRFEGKRFSGTIVGVQENKSSVWHD
        |  |   ||     |   |   |    |   |   ||  ||           
--------SQ-E---SV-----A--DKM--G----M---G-Q-SG--VG-----------
SEWRSLKVQWDEPSSVFRPERVSPWELEPLNLSDALCRELWHACAGPLVTLPREGERVYY
     |          |             |                       |     
----AL----------F-------------N-----------------------G--I--
FPEGHMEQLEASMHQGLEQQMPSFNLPSKILCKVINIQRRAEPETDEVYAQITLLPELDQ
                        |     |    |    |       |           
------------------------N--A--L----N----A-------Y-----------
SEPTSPDAPVQEPEKCTVHSFCKTLTASDTSTHGGFSVLRRHADDCLPPLDMSQQPPWQE
                          |               |      |          
-------------------N------A---------------A------L----------
LVATDLHNSEWHFRHIFRGQPRRHLLTTGWSVFVSSKKLVAGDAFIFLRGENEELRVGVR
| |            |         |           | |            ||      
L-A----------K-I---------L-----------K-V---S-V------EE------
RHMRQQTNIPSSVISSHSMHIGVLATAAHAITTGTIFSVFYKPRTSRSEFIVSVNRYLEA
                                    ||    |    |  |        |
------------------------------------FS----P----S--I--------A
KTQKLSVGMRFKMRFEPEKRFSGTIVGVQENKSSVWHDSEWRSLKVQWDEPSSVFRPERV
             |   |      |              |         |         |
-------------R---E------I-----------Y--E---M---Y-E--A------V
SPWELEPL
|       
S-------
4ldx 1lmb   68  668   92  10.18
DALCRELWHACAGPLVTLPREGERVYYFPEGHMEQLEASMHQGLEQQMPSFNLPSKILCK
    |       |        |  |  |              |     |   ||      
QG--R-V-NQ-LG--------G--V--F-------I----N-G---R-P---LPN-----
VINIQRRAEPETDEVYAQITLLPELDQSEPTSPDAPVQEPEKCTVHSFCKTLTASDTSTH
  ||  |              |              |   |            | |    
--NI--R--------------L-KI-----------V---E----------M-AAD----
GGFSVLRRHADDCLPPLDMSQQPPWQELVATDLHNSEWHFRHIFRGQPRRHLLTTGWSVF
 |     |    |               |      |        | |             
-G--I--R---PC---------------V---I--S--------R-Q-------------
VSSKKLVAGDAFIFLRGENEELRVGVRRHMRQPSSVISSHSMHIGVLATAAHAITTGTIF
                     |        |    |    | | |               
---------------------L--------R----V----S-H-G-------C-----V-
SVFYKPRTSRSEFIVSVNRYLEAKTQKLSVGMRFKMRFEGKRFSGTIVGVQENKSSVWHD
|   |        |   |||     |            |      |  |           
S---K--------I--LNRY-----Q------------E------T--G-----------
SEWRSLKVQWDEPSSVFRPERVSPWELEPLNLSDALCRELWHACAGPLVTLPREGERVYY
              |     |       |                |  |           
--------------SI----R-------P----------------G--V--------I--
FPEGHMEQLEASMHQGLEQQMPSFNLPSKILCKVINIQRRAEPETDEVYAQITLLPELDQ
   |           |           |    |         |      |  |  ||   
---G-----------G-----------S----K---------P---RI-A--T--PEI--
SEPTSPDAPVQEPEKCTVHSFCKTLTASDTSTHGGFSVLRRHADDCLPPLDMSQQPPWQE
 |         | |        |    |  |  | |                |    |  
-E----NR-I-E-E------Y-K---RS--SP-GMF----------------S----W--
LVATDLHNSEWHFRHIFRGQPRRHLLTTGWSVFVSSKKLVAGDAFIFLRGENEELRVGVR
         |     | |                   ||      |  |    |   || 
---------E-----I-R-E-----------------KL------I--R----E---GV-
RHMRQQTNIPSSVISSHSMHIGVLATAAHAITTGTIFSVFYKPRTSRSEFIVSVNRYLEA
   |             |       |   |            |    |   ||      |
CD-R-------------S-------T---A------------P----S---VS------A
KTQKLSVGMRFKMRFEPEKRFSGTIVGVQENKSSVWHDSEWRSLKVQWDEPSSVFRPERV
                        |             |  | |               |
------------------------I-------------S--R-L---------------V
SPWELEPL
        
--------
4ldx 1pdn   88  668  123  13.17
DALCRELWHACAGPLVTLPREGERVYYFPEGHMEQLEASMHQGLEQQMPSFNLPSKILCK
  |          |     | | |  |  ||       | | ||    |     |    |
PYL--QILE--Q-P--K-QR-GFRFRYVAEG------PS-HGGL----PGAS--SE---K
VINIQRRAEPETDEVYAQITLLPELDQSEPTSPDAPVQEPEKCTVHSFCKTLTASDTSTH
  |            |      |   |         |    |      |           
--N--KK----S---Y------P---Q---------V----K--I---C----------N
GGFSVLRRHADDCLPPLDMSQQPPWQELVATDLHNSEWHFRHIFRGQPRRHLLTTGWSVF
    |          |            |                 |    | | |    
--Y-V----G-----P---A------K-V---I---------V---Q----LVTNG----
VSSKKLVAGDAFIFLRGENEELRVGVRRHMRQPSSVISSHSMHIGVLATAAHAITTGTIF
    |       | |      | ||   |               |   |     | |   
----K----N--IHLHA-H-SL-VG--KHC-E--------D---GI-CT----VTAG---
SVFYKPRTSRSEFIVSVNRYLEAKTQKLSVGMRFKMRFEGKRFSGTIVGVQENKSSVWHD
     |          |            |         |  |     |         | 
-----P---K-D--M-V------------V---------G--FA-NL-GI------L-H-
SEWRSLKVQWDEPSSVFRPERVSPWELEPLNLSDALCRELWHACAGPLVTLPREGERVYY
      |        ||  |      ||      | |        |     |  |  |  
-V--T-K-K--K---VF--E--T---LE-ARMTEA-C--I-R---G--YN-P--GLLV-H
FPEGHMEQLEASMHQGLEQQMPSFNLPSKILCKVINIQRRAEPETDEVYAQITLLPELDQ
 |      | |    |   |        |       | | |         | |   | | 
-PD--LAYLQAE-GGG-DRQL-G-D-REK---E-L-I-RQA---A--L-QQ-T--KEMD-
SEPTSPDAPVQEPEKCTVHSFCKTLTASDTSTHGGFSVLRRHADDCLPPLDMSQQPPWQE
    |    |      |   |   |   | || | |   ||     | |   |       
---LS--V-VR--LMFT--AF---L--PD-ST-GSFT--RR-----LEPV-VS-DAIY-D
LVATDLHNSEWHFRHIFRGQPRRHLLTTGWSVFVSSKKLVAGDAFIFLRGENEELRVGVR
  |    |       | |    |   | |    |       |   | |      |     
SKA-P--NAS-NLK-IVR-MD-R---TAG--C-V-T----GGEE-IYL------L-CD--
RHMRQQTNIPSSVISSHSMHIGVLATAAHAITTGTIFSVFYKPRTSRSEFIVSVNRYLEA
    |   |            |           |  |  |  | |        | |    
K-V-QKDDIQIRFYEEEE-N-G-------GVWEG--FGDF-SP-T---D----VHR----
KTQKLSVGMRFKMRFEPEKRFSGTIVGVQENKSSVWHDSEWRSLKVQWDEPSSVFRPERV
  |       ||    | |     |        ||      |  |   |   |   |   
--Q-FAI-V-FK---TP-K-YK-DI-NITK-PASVF--VQLRR-K-S-DLETS--EP-K-
SPWELEPL
 |    | 
-PFLYYPE
4ldx 1svc  124  668  311  18.56
DALCRELWHACAGPLVTLPREGERVYYFPEGHMEQLEASMHQGLEQQMPSFNLPSKILCK
             |   | |   |            ||           |         |
----KD-------P-AALKR-A-R-------N---TEAA------RR--S-R--AR---K
VINIQRRAEPETDEVYAQITLLPELDQSEPTSPDAPVQEPEKCTVHSFCKTLTASDTSTH
    | |          |   | | |          | | |          |  |     
---LQ-R-------M-KQ---L-E-D--K-------V-E-E---L------L--S--K-N
GGFSVLRRHADDCLPPLDMSQQPPWQELVATDLHNSEWHFRHIFRGQPRRHLLTTGWSVF
        |       |         |       | |            |  |       
--Y-----H-------L---------E-------N-E-----V--A---R--L-------
VSSKKLVAGDAFIFLRGENEELRVGVRRHMRQPSSVISSHSMHIGVLATAAHAITTGTIF
   ||||         |   |      | |  |                 | |       
---KKLV---------G---E------R-MKDP-----------------A-A-----L-
SVFYKPRTSRSEFIVSVNRYLEAKTQKLSVGMRFKMRFEGKRFSGTIVGVQENKSSVWHD
    | |  |       |                           |              
----K-R-AR-------N---------------------------T--------------
SEWRSLKVQWDEPSSVFRPERVSPWELEPLNLSDALCRELWHACAGPLVTLPREGERVYY
           |     |  |           |    |      |       |       
-----------E-AA--R--R-----------S----R------A-------R---K---
FPEGHMEQLEASMHQGLEQQMPSFNLPSKILCKVINIQRRAEPETDEVYAQITLLPELDQ
                | | |           |                 |   | | | 
----------------L-QRM-----------K-----------------Q---L-E-D-
SEPTSPDAPVQEPEKCTVHSFCKTLTASDTSTHGGFSVLRRHADDCLPPLDMSQQPPWQE
         | | |                                |  |  |       
-K-------V-E-E--------------------------------L--L--S------K
LVATDLHNSEWHFRHIFRGQPRRHLLTTGWSVFVSSKKLVAGDAFIFLRGENEELRVGVR
       |               |                       |  || |      
-------N--------Y------H-----------------------L--EN-E------
RHMRQQTNIPSSVISSHSMHIGVLATAAHAITTGTIFSVFYKPRTSRSEFIVSVNRYLEA
                      |      |                         | |  
----------------------V------A-------------------------R-L--
KTQKLSVGMRFKMRFEPEKRFSGTIVGVQENKSSVWHDSEWRSLKVQWDEPSSVFRPERV
|  ||                    ||                                 
K--KL--------------------VG---------------------------------
SPWELEPL
     |  
-----E--
4ldx 1ysa   79  668  114  11.83
DALCRELWHACAGPLVTLPREGERVYYFPEGHMEQLEASMHQGLEQQMPSFNLPSKILCK
                  |                  |                     |
------------------P----K-------------A---------------------K
VINIQRRAEPETDEVYAQITLLPELDQSEPTSPDAPVQEPEKCTVHSFCKTLTASDTSTH
      |                           |              |          
------R---------------------------A--------------K----------
GGFSVLRRHADDCLPPLDMSQQPPWQELVATDLHNSEWHFRHIFRGQPRRHLLTTGWSVF
        |             ||                     |        |     
--------H-------------PP---------------------G--------T-----
VSSKKLVAGDAFIFLRGENEELRVGVRRHMRQPSSVISSHSMHIGVLATAAHAITTGTIF
                    |                                       
--------------------E---------------------------------------
SVFYKPRTSRSEFIVSVNRYLEAKTQKLSVGMRFKMRFEGKRFSGTIVGVQENKSSVWHD
    ||            |         |            | |      |         
----KP------------R---------S------------R-S------Q---------
SEWRSLKVQWDEPSSVFRPERVSPWELEPLNLSDALCRELWHACAGPLVTLPREGERVYY
||      |                   |               |    |          
SE------Q-------------------P---------------A----T----------
FPEGHMEQLEASMHQGLEQQMPSFNLPSKILCKVINIQRRAEPETDEVYAQITLLPELDQ
                               |          |        |        
-------------------------------C----------P--------I--------
SEPTSPDAPVQEPEKCTVHSFCKTLTASDTSTHGGFSVLRRHADDCLPPLDMSQQPPWQE
               |          |          |  |                 | 
---------------C----Y-----A----------VI-R-----------------Q-
LVATDLHNSEWHFRHIFRGQPRRHLLTTGWSVFVSSKKLVAGDAFIFLRGENEELRVGVR
        |    |       |||                       |     ||     
--------S----RNL-----RRH-----------------------L-----EL-----
RHMRQQTNIPSSVISSHSMHIGVLATAAHAITTGTIFSVFYKPRTSRSEFIVSVNRYLEA
   |                        |                    |         |
---R------------------------H--------------------F---------A
KTQKLSVGMRFKMRFEPEKRFSGTIVGVQENKSSVWHDSEWRSLKVQWDEPSSVFRPERV
           |    |         |                                |
-----------K----P---------G--------------------------------V
SPWELEPL
        
--------
4ldx 1yui   49  668   54   7.34
DALCRELWHACAGPLVTLPREGERVYYFPEGHMEQLEASMHQGLEQQMPSFNLPSKILCK
   |       |     |                    |   |                 
-S-C---F---A-----L------I-------------S---G-----------------
VINIQRRAEPETDEVYAQITLLPELDQSEPTSPDAPVQEPEKCTVHSFCKTLTASDTSTH
           |    |                    |      |    |          
-----------T----A----------------N---Q------V----K----------
GGFSVLRRHADDCLPPLDMSQQPPWQELVATDLHNSEWHFRHIFRGQPRRHLLTTGWSVF
            |                           |  |     |          
------------C--------------------------YR--F-----R----------
VSSKKLVAGDAFIFLRGENEELRVGVRRHMRQPSSVISSHSMHIGVLATAAHAITTGTIF
|  ||             |         | |           |                 
V--KK-------------N---------H-R-----------H--------R--------
SVFYKPRTSRSEFIVSVNRYLEAKTQKLSVGMRFKMRFEGKRFSGTIVGVQENKSSVWHD
   |       |     |      |                    |              
---Y-------E-----N----C-T--------------------T--------------
SEWRSLKVQWDEPSSVFRPERVSPWELEPLNLSDALCRELWHACAGPLVTLPREGERVYY
         |      |    |        |              |         ||   
----T----W------F---TVA----D--N--------------G--------AER---
FPEGHMEQLEASMHQGLEQQMPSFNLPSKILCKVINIQRRAEPETDEVYAQITLLPELDQ
   |   |  |        |         ||     |       |               
--QG---Q--A--------Q---------IL-----I-------T---FG----------
SEPTSPDAPVQEPEKCTVHSFCKTLTASDTSTHGGFSVLRRHADDCLPPLDMSQQPPWQE
| | |     |                 |      |  |  |      ||      |   
S-P-S-----Q---R-------Q-----D------F--L-KH----V-PL------P---
LVATDLHNSEWHFRHIFRGQPRRHLLTTGWSVFVSSKKLVAGDAFIFLRGENEELRVGVR
                    |                                    |  
--------------------P------------------------------------G--
RHMRQQTNIPSSVISSHSMHIGVLATAAHAITTGTIFSVFYKPRTSRSEFIVSVNRYLEA
  |    |     |   |               |     |    |              |
--M----N-----I---S---------------G-----F----T--------------A
KTQKLSVGMRFKMRFEPEKRFSGTIVGVQENKSSVWHDSEWRSLKVQWDEPSSVFRPERV
                                          ||    |     |     
------------------------------------------SL----D-----F-----
SPWELEPL
        
--------
4ldx 2bop   66  668   85   9.88
DALCRELWHACAGPLVTLPREGERVYYFPEGHMEQLEASMHQGLEQQMPSFNLPSKILCK
                |            ||     |   |                   
-------F--------T------K-----EG-----E---H-------------------
VINIQRRAEPETDEVYAQITLLPELDQSEPTSPDAPVQEPEKCTVHSFCKTLTASDTSTH
           |   |                                ||          
-----------T---Y-------------------------R------CK----------
GGFSVLRRHADDCLPPLDMSQQPPWQELVATDLHNSEWHFRHIFRGQPRRHLLTTGWSVF
    |       |                      |             |          
----V-------C----------------------S-------------R----------
VSSKKLVAGDAFIFLRGENEELRVGVRRHMRQPSSVISSHSMHIGVLATAAHAITTGTIF
      |                                         |  |        
------V------Y----------------------------------T--H--------
SVFYKPRTSRSEFIVSVNRYLEAKTQKLSVGMRFKMRFEGKRFSGTIVGVQENKSSVWHD
             |                             |        |       
-------------I-----------------------------S--------N-------
SEWRSLKVQWDEPSSVFRPERVSPWELEPLNLSDALCRELWHACAGPLVTLPREGERVYY
                |                   ||   |                 |
----------------F-------------------CR---H-----------------Y
FPEGHMEQLEASMHQGLEQQMPSFNLPSKILCKVINIQRRAEPETDEVYAQITLLPELDQ
           | |              |      |           ||           
--------V-TS-H--------------K---R--NV--K-------VY-----------
SEPTSPDAPVQEPEKCTVHSFCKTLTASDTSTHGGFSVLRRHADDCLPPLDMSQQPPWQE
            |  |    ||             |                        
------------P--C---PFC-------------F----K-------------------
LVATDLHNSEWHFRHIFRGQPRRHLLTTGWSVFVSSKKLVAGDAFIFLRGENEELRVGVR
         |      |          |         |    |                 
---------E------F----------T--------RK----D-----------------
RHMRQQTNIPSSVISSHSMHIGVLATAAHAITTGTIFSVFYKPRTSRSEFIVSVNRYLEA
       |          |      | ||         |  |        |         
-------N----------M------T-AH---------V--K--------I---------
KTQKLSVGMRFKMRFEPEKRFSGTIVGVQENKSSVWHDSEWRSLKVQWDEPSSVFRPERV
                        |           |       |               
------------------------I-----------H-------K---------------
SPWELEPL
        
--------
4ldx 2drp   51  668   63   7.63
----D-------A----------L---C----------RE-L--W-----H--A---C-A
            |          |   |          ||    |     |      |  
KPPYSYIALITMAILQSPQKKLTLSGICEFISNRFPYYREKFPAWQNSIRHNLSLNDCFV
------G-P-L--V-TL-PR-E-----G------ERV---Y-Y--------F--PE----
      | |      || |  |     |       ||   | |           |     
KIPREPGNPGKGNYWTLDPQSEDMFDNGSFLRRRKRVKPPYSYIALITMAILQSPQKKLT
--G--H-M-EQL----E---A---SM-H-------------Q------G----LE-Q-Q-
  |             |   |   |  |                    |    |  |   
LSGICEFISNRFPYYREKFPAWQNSIRHNLSLNDCFVKIPREPGNPGKGNYWTLDPQSED
M---------------P-SF----N---L--P-SKI-L---CKVI-N--------I---Q
|               | |         |  |  |  |   |  | |            |
MFDNGSFLRRRKRVKPPYSYIALITMAILQSPQKKLTLSGICEFISNRFPYYREKFPAWQ
---R-R-A--E-----P-E----------T-D---E--------------V-----Y-AQ
   |            | |          | |   |              |     | | 
NSIRHNLSLNDCFVKIPREPGNPGKGNYWTLDPQSEDMFDNGSFLRRRKRVKPPYSYIAL
IT--LL--PE----LD---Q--S-------E--P----T-----S-PD--APV-QEP-E-
||   |  |     |       |       |  |          |  |       ||   
ITMAILQSPQKKLTLSGICEFISNRFPYYREKFPAWQNSIRHNLSLNDCFVKIPREPGNP
-K---CT-------V--H-SF------CK---T---L-T-A---S-DTS-T-HG--GF-S
 |    |            ||       |       | | |   |     |  |   | |
GKGNYWTLDPQSEDMFDNGSFLRRRKRVKPPYSYIALITMAILQSPQKKLTLSGICEFIS
----VLR----------RH--A-DDC---L---P--P-------L-----DM----S---
      |          ||     ||       |  |       |     ||    |   
NRFPYYREKFPAWQNSIRHNLSLNDCFVKIPREPGNPGKGNYWTLDPQSEDMFDNGSFLR
---Q-QPPWQ--ELV--A---------T-----D-LHN-----SE----W-H-FRH---I
      ||     |   |         |         |      |    |    ||    
RRKRVKPPYSYIALITMAILQSPQKKLTLSGICEFISNRFPYYREKFPAWQNSIRHNLSL
---F----R--GQP-R-RH--L------L-TTG------------WS-V-FV--S---S-
   |    |  | |       |          |             |           | 
NDCFVKIPREPGNPGKGNYWTLDPQSEDMFDNGSFLRRRKRVKPPYSYIALITMAILQSP
-KKL-VAG--D--A---------F------I---------F--L-R-----GE-N-----
 |||   |               |      |         |    |     |  |     
QKKLTLSGICEFISNRFPYYREKFPAWQNSIRHNLSLNDCFVKIPREPGNPGKGNYWTLD
---EEL-RVG--V--R-R------H-----MR--Q-P----S-S-V---IS---------
   |     |     | |            |   | |      |     ||         
PQSEDMFDNGSFLRRRKRVKPPYSYIALITMAILQSPQKKLTLSGICEFISNRFPYYREK
------S--H--SMH-----I-------------------------G--------V----
      |  |  |       |                         |        |    
FPAWQNSIRHNLSLNDCFVKIPREPGNPGKGNYWTLDPQSEDMFDNGSFLRRRKRVKPPY
--LA--T-A---A-H-AIT-TGTI-F-S-VF--Y--K-P--RTS-R---S--E-FI-V--
   |  | |         |  |   | |  |  |  | |    | |   |    |     
SYIALITMAILQSPQKKLTLSGICEFISNRFPYYREKFPAWQNSIRHNLSLNDCFVKIPR
SV-N--R--Y--L----E------A--------K---------T-------Q-KLSV-G-
   |     |  |    |               |         |       | ||   | 
EPGNPGKGNYWTLDPQSEDMFDNGSFLRRRKRVKPPYSYIALITMAILQSPQKKLTLSGI
---M--RFK-MR--F---EGK-R--FS-G-TIVGV-QE--N--KSSVWH-D--SE--W-R
      ||   |  |       |   |     |    |  |  |   |  |  ||     
CEFISNRFPYYREKFPAWQNSIRHNLSLNDCFVKIPREPGNPGKGNYWTLDPQSEDMFDN
-S-L---K-VQ--WD----------E-P----S-S-V--F---R-P-ERVS-P-WE--L-
 | |   | |                 |      |    |   | |  |   | |     
GSFLRRRKRVKPPYSYIALITMAILQSPQKKLTLSGICEFISNRFPYYREKFPAWQNSIR
EPLNLSDA-L-C-RE--------LW----HA--C--AG-----------P-----LVT--
  | | |      ||         |            |           |     | |  
HNLSLNDCFVKIPREPGNPGKGNYWTLDPQSEDMFDNGSFLRRRKRVKPPYSYIALITMA
-L--P-RE----G--E----RV-YY---FP--E-G--H---M---------E-----Q--
 |  |       |  |    |  ||   ||       |             |        
ILQSPQKKLTLSGICEFISNRFPYYREKFPAWQNSIRHNLSLNDCFVKIPREPGNPGKGN
---LE-AS--M-HQG--L--EQQM--P-SF----N---L--P-SKI-L---CKVI-N---
   |   |  |   |  |        | |         |  |  |  |   |  | |   
YWTLDPQSEDMFDNGSFLRRRKRVKPPYSYIALITMAILQSPQKKLTLSGICEFISNRFP
-----I---Q---R-R-A--E-----P-E----------T-D---E--------------
         |   |            | |          | |   |              
YYREKFPAWQNSIRHNLSLNDCFVKIPREPGNPGKGNYWTLDPQSEDMFDNGSFLRRRKR
V-----Y-AQIT--LL--PE----LD---Q--S-------E--P----T-----S-PD--
|     | | ||   |  |     |       |       |  |          |  |  
VKPPYSYIALITMAILQSPQKKLTLSGICEFISNRFPYYREKFPAWQNSIRHNLSLNDCF
APV-QEP-E--K---CT-------V--H-SF------CK---T---L-T-A---S-DTS-
     ||    |    |            ||       |       | | |   |     
VKIPREPGNPGKGNYWTLDPQSEDMFDNGSFLRRRKRVKPPYSYIALITMAILQSPQKKL
T-HG--GF-S----VLR----------RH--A-DDC---L---P--P-------L-----
|  |   | |      |          ||     ||       |  |       |     
TLSGICEFISNRFPYYREKFPAWQNSIRHNLSLNDCFVKIPREPGNPGKGNYWTLDPQSE
DM----S------Q-QPPWQ--ELV--A---------T-----D-LHN-----SE----W
||    |         ||     |   |         |         |      |    |
DMFDNGSFLRRRKRVKPPYSYIALITMAILQSPQKKLTLSGICEFISNRFPYYREKFPAW
-H-FRH---I---F----R--GQP-R-RH--L------L-TTG------------WS-V-
    ||       |    |  | |       |          |             |   
QNSIRHNLSLNDCFVKIPREPGNPGKGNYWTLDPQSEDMFDNGSFLRRRKRVKPPYSYIA
FV--S---S--KKL-VAGDA-FI---F--LR----G-EN---EELRVG---VR--RHM-R
        |  |||   |   ||   |   |       |     |      |   |    
LITMAILQSPQKKLTLSGICEFISNRFPYYREKFPAWQNSIRHNLSLNDCFVKIPREPGN
Q-QTN---I-P-S-SVISSHS-M----HI----G-V-LAT-A---A-H-AIT-TGTI-F-
    |     | |       |                | | |         |  |   | 
PGKGNYWTLDPQSEDMFDNGSFLRRRKRVKPPYSYIALITMAILQSPQKKLTLSGICEFI
S-VF--Y--K-P--RTS-R---S--E-FI-V--SV-N--R--Y--L----E------A--
|  |  |  | |    | |   |    |        |     |  |    |         
SNRFPYYREKFPAWQNSIRHNLSLNDCFVKIPREPGNPGKGNYWTLDPQSEDMFDNGSFL
------K---------T-------Q-KLSV-GM-RF-KMRF----E--P--E-K-R--FS
      |         |       | ||   |   |   ||    |  |      |   |
RRRKRVKPPYSYIALITMAILQSPQKKLTLSGICEFISNRFPYYREKFPAWQNSIRHNLS
-G-TIVGV-QE--N--KSSVWH-D--SE--W-R-S-L---K-VQ--WD----------E-
     |    |  |  |   |  |  ||      | |   | |                 
LNDCFVKIPREPGNPGKGNYWTLDPQSEDMFDNGSFLRRRKRVKPPYSYIALITMAILQS
P----S-S-V--F---R-P---E---------R---------V-------SP-----WEL
|      |    |   | |   |         |         |        |     | |
PQKKLTLSGICEFISNRFPYYREKFPAWQNSIRHNLSLNDCFVKIPREPGNPGKGNYWTL
EP-----------L-----
 |           |     
DPQSEDMFDNGSFLRRRKR
4ldx 2hdc  351  668 1939  18.10
DALCRELWHACAGPLVTLPREGERVYYFPEGHMEQLEASMHQGLEQQMPSFNLPSKILCK
   ||  |  |           |    |     |||    |                   
ETDCR--WDGC-----S---Q-E----F-DS-QEQL---VH----------H--------
VINIQRRAEPETDEVYAQITLLPELDQSEPTSPDAPVQEPEKCTVHSFCKTLTASDTSTH
 ||       |            |    |       |     |  |              
-IN----S--E--HIHG------E--RKE-----F-V-----C--H-W------------
GGFSVLRRHADDCLPPLDMSQQPPWQELVATDLHNSEWHFRHIFRGQPRRHLLTTGWSVF
||          |      |      |     |           |  |           |
GG----------C------S-----RE-----L-----------R--P-----------F
VSSKKLVAGDAFIFLRGENEELRVGVRRHMRQPSSVISSHSMHIGVLATAAHAITTGTIF
    |  |             | | |  |||                    |   ||   
----K--A-Q---YM------L-V-V--HMRR-------------------H---TG---
SVFYKPRTSRSEFIVSVNRYLEAKTQKLSVGMRFKMRFEGKRFSGTIVGVQENKSSVWHD
    ||                  |            ||| |           |      
E---KP-------------H-KC-T------------FEGCR-----------K------
SEWRSLKVQWDEPSSVFRPERVSPWELEPLNLSDALCRELWHACAGPLVTLPREGERVYY
    |         |     |     ||  |    |             |          
----S----Y----S-----R-----LE--N----L-K-----------T----------
FPEGHMEQLEASMHQGLEQQMPSFNLPSKILCKVINIQRRAEPETDEVYAQITLLPELDQ
    |   |  | | | |   |         |              |             
----H---LR-S-HTG-E-K-P-Y------MC--------------E-H-----------
SEPTSPDAPVQEPEKCTVHSFCKTLTASDTSTHGGFSVLRRHADDCLPPLDMSQQPPWQE
 |             |   |  |   |        ||     |         |       
-E-----G-------C---S--K---A--------FS----NA---------S-------
LVATDLHNSEWHFRHIFRGQPRRHLLTTGWSVFVSSKKLVAGDAFIFLRGENEELRVGVR
    |         |    | | |          |  |                |     
----D--RA----KH----QNRTH----------SNEK-----PYV-CK-----L-----
RHMRQQTNIPSSVISSHSMHIGVLATAAHAITTGTIFSVFYKPRTSRSEFIVSVNRYLEA
         |           |            |      |             ||   
---------P-----------G-------C----T------K-------------RY---
KTQKLSVGMRFKMRFEPEKRFSGTIVGVQENKSSVWHDSEWRSLKVQWDEPSSVFRPERV
 |              |    |         |    |       |        |      
-T-------------DP----S-SL---R--K----H------VK-------TV----H-
SPWELEPL
        
G-------
4ldx 2gli   93  668  155  13.92
DALCRELWHACAGPLVTLPREGERVYYFPEGHMEQLEASMHQGLEQQMPSFNLPSKILCK
                |                  |  |     |       |  |   |
--M--Q----------T------------------L--S-----E-R-----L--K---K
VINIQRRAEPETDEVYAQITLLPELDQSEPTSPDAPVQEPEKCTVHSFCKTLTASDTSTH
     ||         |       |                        |          
-----RR-------I-A-------L------------------------K----------
GGFSVLRRHADDCLPPLDMSQQPPWQELVATDLHNSEWHFRHIFRGQPRRHLLTTGWSVF
                  |           |               |       |     
------------------M-----------T---------------Q-------T-----
VSSKKLVAGDAFIFLRGENEELRVGVRRHMRQPSSVISSHSMHIGVLATAAHAITTGTIF
                    |                         |     |    |  
--------------------E-------------------------L-----A----T--
SVFYKPRTSRSEFIVSVNRYLEAKTQKLSVGMRFKMRFEGKRFSGTIVGVQENKSSVWHD
    |                 |                         |       |   
----K-----------------A-------------------------G-------V---
SEWRSLKVQWDEPSSVFRPERVSPWELEPLNLSDALCRELWHACAGPLVTLPREGERVYY
      | |     |                |      |     ||  ||      |   
------K-Q--Q--S------I-----Q---L---I--E-----AG--VT--K---R---
FPEGHMEQLEASMHQGLEQQMPSFNLPSKILCKVINIQRRAEPETDEVYAQITLLPELDQ
 |                     |      |                         |   
-P-----------------R---F------L-----------------F-------EI--
SEPTSPDAPVQEPEKCTVHSFCKTLTASDTSTHGGFSVLRRHADDCLPPLDMSQQPPWQE
       |                  |           |      |    |     |   
-------A----------------M-A-----------L-----NC----D-----P---
LVATDLHNSEWHFRHIFRGQPRRHLLTTGWSVFVSSKKLVAGDAFIFLRGENEELRVGVR
 |                           |                        |     
-V---------------------------W------------------------L-----
RHMRQQTNIPSSVISSHSMHIGVLATAAHAITTGTIFSVFYKPRTSRSEFIVSVNRYLEA
     |                                                  |   
-----Q--------------------------------------------------Y---
KTQKLSVGMRFKMRFEPEKRFSGTIVGVQENKSSVWHDSEWRSLKVQWDEPSSVFRPERV
                      ||                    |               
----------------------GT--------------------K---------------
SPWELEPL
        
--------
4ldx 3cro   52  668   66   7.78
PISPIETVPVKLKPGMDGPKVKQWPLTEEKIKALVEICTEMEKEGKISKIGPENPYNTPV
                       |||                     |  |    |    
-----------------------WPL------S-----S----Q---S--G--S-Y----
FAIKKKDSTKWRKLVDFRELNKRTQDFWEVQLGIPHPAGLKKKKSVTVLDVGDAYFSVPL
                  ||  |     |||   | |                |      
------------------EL--R---I-EVQ---PKP----HHR---------AHY----
DEDFRKYTAFTIPSINNETPGIRYQYNVLPQGWKGSPAIFQSSMTKILEPFKKQNPDIVI
 |        |      |  |             |  |              |  |    
-E--------T------E--G-----S------RG--A--------V-----KA-P----
YQYIDDLYVGSDLEIGQHRTKIEELRQHLLRWGLTTPDKKHQKEPPFLWMGYELHPDKWT
         |     | |        |      |      |         ||     |  
--------TG-----G-H--PV--V-Q------L------H---------GY-ME-NK--
VQPIVLPEKDSWTVNDIQKLVGKLNWASQIYPGIKVRQLSKLLRGTKALTEVIPLTEEAE
      |            | | |    ||   |          |          |  | 
------P------------L-G-L----QIF--I----------G----------T--A-
LELAENREILKEPVHGVYYDPSKDLIAEIQKQGQGQWTYQIYQEPFKNLKTGKYARMRGA
    | | ||| | |           |           ||          |||       
-D--E-R-ILK-P-H-----------A---------F-YQVH----R-I-TGK-------
HTNDVKQLTEAVQKITTESIVIWGKTPKFKLPIQKETWETWWTEYWQATWIPEWEFVNTP
 |  |   |    |     ||  | |   |             |      ||  |     
-T--V--TTTSYEK-----IV--GNT---KV-L----------E------IP-LE-----
PLVKLWYQLEKEPIVGAETFYVDGAANRETKLGKAGYVTNKGRQKVVPLTNTTNQKTELQ
|  |            | |   |           ||        |   |    |      
P--K--NNM-R-----A-T--ID--C--------AG-IL-----K---L-R--N--ADIE
AIYLALQDSGLEVNIVTDSQYALGIIQAQPDKSESELVNQIIEQLIKKEKVYLAWVPAHK
     |   | |    ||     |       |            |     |    |  | 
-----LR-KG-E----TD----IG----R--KN-T----R-V-RL-----VF-R-V--H-
GIGGNEQVDKLVSAGIRKPISPIETVPVKLKPGMDGPKVKQWPLTEEKIKALVEICTEME
 |   |      | | |   |   |                 |     |    | |    
-I--PE------SSG-R-IVS-LQT--A----S-N-------P-----I----E-CS---
KEGKISKIGPENPYNTPVFAIKKKDSTKWRKLVDFRELNKRTQDFWEVQLGIPHPAGLKK
     |    |     |            |   |       | |     |      |   
-Q-R-S--AHE----LPM--V---E----RQ--D-------T-D--SC-L-V-Y--G---
KKSVTVLDVGDAYFSVPLDEDFRKYTAFTIPSINNETPGIRYQYNVLPQGWKGSPAIFQS
         |                   |      | |   | |            |  
---------G---------Q---Q---M-I--L---T-G---Q-N------------F--
SMTKILEPFKKQNPDIVIYQYIDDLYVGSDLEIGQHRTKIEELRQHLLRWGLTTPDKKHQ
  |   |   |     |                    |   |          || |   |
--TS--E--SK-----V----V---F-----------T---E------K---TT-D--GQ
KEPPFLWMGYELHPDKWTVQPIVLPEKDSWTVNDIQKLVGKLNWASQIYPGIKVRQLSKL
      |   |              |    || |  |   |    ||  |          
-Q---IW---E------------M-E--A-TV-D--K--DK----SQ--P-------N-M
LRGTKALTEVIPLTEEAELELAENREILKEPVHGVYYDPSKDLIAEIQKQGQGQWTYQIY
|       | ||       |   |    |   |     |                 |   
L-----FVE-IP-------EY-RN----K---H-I-RTP----V-KV------NF-Y-V-
QEPFKNLKTGKYARMRGAHTNDVKQLTEAVQKITTESIVIWGKTPKFKLPIQKETWETWW
     |   ||    |       |            |            | |        
---I-N---GK----R-------K-------R----S----------Q-P-Q----H--F
TEYWQATWIPEWEFVNTPPLVKLWYQLEDIQMTQTTSSLSASLGDRVTISCSASQDISSY
| |      |    |            |            |           |    |  
T-Y-H----P----VRR---IR---R-E-----R--NKM-A-----------AAK--SR-
LNWYQQKPEGTVKLLIYYTSSLHSGVPSAFSGSGSGTDYSLTISNLEPEDFATYYCQQYS
 |      |            |              ||   |   |  |   |    |  
-N--RRR-E------------L--------------TD---T---LQAE---T---DQ--
KFPWTFGGGTKLEIKRADAAPTVSIFPPSSEQLTSGGASVVCFLNNFYPKDINVAWAIDG
           ||    |            |                  |          
-----------LE----D------------E------------------K----------
SAAANGVLNSWTDQDSKDSTYSMSSTLTLTADEYEAANSYTCAATHKTSTSPIVKSFNAN
|  |   |     |               |    | ||                |     
S--A---L-----Q---------------T----EIAN--------------LLK-----
ECQITLKESGPGIVQPSQPFRLTCTFSGFSLSTSGIGVTWIRQPSGKGLEWLATIWWDDD
|     ||            |                    |          |       
E-----KEK-----R--K--R---------M----------R--N-R----IAA------
NRYNPSLKSRLTVSKDTSNNQAFLNMMTVETADTAIYYCAQSAITSVTDSAMDHWGQGTS
     | |||    |        |     |     |   |                    
-----S-KSR----K----RK--L-----E----RI---AR--L----E---E---K---
VTVSSAATTPPSVYPLAPGSAAQTNSMVTLGCLVKGYFPEPVTVTWNSGSLSSGVHTFPA
  |     |      |     || ||             |          | |   |  |
--V-K---T------L---K-AQ-NS-------------E----------LAS---T--A
VLQSDLYTLSSSVTVPSSTWPSETVTCNVAHPASSTKVDKKI
        |             |     |   |         
----NM--L------------RE----QV---A-------QL
1j5o 1a02  218 1422  385  15.33
PISPIETVPVKLKPGMDGPKVKQWPLTEEKIKALVEICTEMEKEGKISKIGPENPYNTPV
                |                                           
----------------D-------------------------------------------
FAIKKKDSTKWRKLVDFRELNKRTQDFWEVQLGIPHPAGLKKKKSVTVLDVGDAYFSVPL
 ||                    |         | |                        
-AI--------------------T---------I-H------------------------
DEDFRKYTAFTIPSINNETPGIRYQYNVLPQGWKGSPAIFQSSMTKILEPFKKQNPDIVI
                                                            
------------------------------------------------------------
YQYIDDLYVGSDLEIGQHRTKIEELRQHLLRWGLTTPDKKHQKEPPFLWMGYELHPDKWT
          |          |                               |  | | 
----------S----------I-------------------------------L--D-W-
VQPIVLPEKDSWTVNDIQKLVGKLNWASQIYPGIKVRQLSKLLRGTKALTEVIPLTEEAE
   |   |       |                                            
---I---E-------D--------------------------------------------
LELAENREILKEPVHGVYYDPSKDLIAEIQKQGQGQWTYQIYQEPFKNLKTGKYARMRGA
     |   | |         |                      |               
-----N---L-E---------S----------------------P---------------
HTNDVKQLTEAVQKITTESIVIWGKTPKFKLPIQKETWETWWTEYWQATWIPEWEFVNTP
       |          |                                         
-------L----------S-----------------------------------------
PLVKLWYQLEKEPIVGAETFYVDGAANRETKLGKAGYVTNKGRQKVVPLTNTTNQKTELQ
        |||          |      |             |                 
--------LEK----------V----S-E-------------R-----------------
AIYLALQDSGLEVNIVTDSQYALGIIQAQPDKSESELVNQIIEQLIKKEKVYLAWVPAHK
        ||          |             |              |    |   | 
--------SG----------Y-------------S--------------K----W---H-
GIGGNEQVDKLVSAGIRKPISPIETVPVKLKPGMDGPKVKQWPLTEEKIKALVEICTEME
      |         |                                         | 
-L----Q---------R-----------------------------------------M-
KEGKISKIGPENPYNTPVFAIKKKDSTKWRKLVDFRELNKRTQDFWEVQLGIPHPAGLKK
                  |        |  |     |    |        |  |      
------------------F--------K--K-----E----T--------G--H------
KKSVTVLDVGDAYFSVPLDEDFRKYTAFTIPSINNETPGIRYQYNVLPQGWKGSPAIFQS
  |   |  |  |         |        |        |          |        
--S---L--GQ-Y--I------R--------S--------R----------K--------
SMTKILEPFKKQNPDIVIYQYIDDLYVGSDLEIGQHRTKIEELRQHLLRWGLTTPDKKHQ
 ||   |              |                                     |
-MT---E--------------I------A------------------------------Q
KEPPFLWMGYELHPDKWTVQPIVLPEKDSWTVNDIQKLVGKLNWASQIYPGIKVRQLSKL
|          |   |         |  |             |                 
K----------L---K---------E--S-------------N-----------------
LRGTKALTEVIPLTEEAELELAENREILKEPVHGVYYDPSKDLIAEIQKQGQGQWTYQIY
        |  |              ||        |     | ||             |
--------E--P--------------IL--------Y-----L-AE--R----------Y
QEPFKNLKTGKYARMRGAHTNDVKQLTEAVQKITTESIVIWGKTPKFKLPIQKETWETWW
         |                         ||              |        
---------G-F-----------------------ES--------------Q--------
TEYWQATWIPEWEFVNTPPLVKLWYQLEDIQMTQTTSSLSASLGDRVTISCSASQDISSY
    |           |         |        |         | |            
----Q-----------T---------L--------T---------R-T------------
LNWYQQKPEGTVKLLIYYTSSLHSGVPSAFSGSGSGTDYSLTISNLEPEDFATYYCQQYS
            |                               |             | 
---F--------K-------------------------------N-------------Y-
KFPWTFGGGTKLEIKRADAAPTVSIFPPSSEQLTSGGASVVCFLNNFYPKDINVAWAIDG
     |           |    |    |                    |           
-----F-----------D----V----P--------------------P-----------
SAAANGVLNSWTDQDSKDSTYSMSSTLTLTADEYEAANSYTCAATHKTSTSPIVKSFNAN
                                             |              
---------------------------------------------H--------------
ECQITLKESGPGIVQPSQPFRLTCTFSGFSLSTSGIGVTWIRQPSGKGLEWLATIWWDDD
                                              |             
----------------------------------------------K-------------
NRYNPSLKSRLTVSKDTSNNQAFLNMMTVETADTAIYYCAQSAITSVTDSAMDHWGQGTS
  |      |      |       |                          |    |   
--Y------RM-----T-------N--------------------------M----Q---
VTVSSAATTPPSVYPLAPGSAAQTNSMVTLGCLVKGYFPEPVTVTWNSGSLSSGVHTFPA
                  |      |           |            |    |  | 
------------------G---E--S--------R--F------------L----H--P-
VLQSDLYTLSSSVTVPSSTWPSETVTCNVAHPASSTKVDKKI
        |                                 
--------L---------------------------------
1j5o 1bl0  105 1422  116   7.38
PISPIETVPVKLKPGMDGPKVKQWPLTEEKIKALVEICTEMEKEGKISKIGPENPYNTPV
                                                            
------------------------------------------------------------
FAIKKKDSTKWRKLVDFRELNKRTQDFWEVQLGIPHPAGLKKKKSVTVLDVGDAYFSVPL
                      |                                   | 
----------------------R-----------------------------------P-
DEDFRKYTAFTIPSINNETPGIRYQYNVLPQGWKGSPAIFQSSMTKILEPFKKQNPDIVI
    |             |                  | | ||     |           
----R-------------T------------------A-F-SS-----E-----------
YQYIDDLYVGSDLEIGQHRTKIEELRQHLLRWGLTTPDKKHQKEPPFLWMGYELHPDKWT
 |    |                       |  |     |   |  |             
-Q----L---A-------------------R--L-----K--RE--F-------------
VQPIVLPEKDSWTVNDIQKLVGKLNWASQIYPGIKVRQLSKLLRGTKALTEVIPLTEEAE
                        |                                   
------------------------N-----------------------------------
LELAENREILKEPVHGVYYDPSKDLIAEIQKQGQGQWTYQIYQEPFKNLKTGKYARMRGA
    |||           |     |            |     |             |  
----ENR-----------Y-----L------------T-----E-------------R--
HTNDVKQLTEAVQKITTESIVIWGKTPKFKLPIQKETWETWWTEYWQATWIPEWEFVNTP
                                                            
------------------------------------------------------------
PLVKLWYQLEKEPIVGAETFYVDGAANRETKLGKAGYVTNKGRQKVVPLTNTTNQKTELQ
                           |              |                 
---------------------------R--------------R-----------------
AIYLALQDSGLEVNIVTDSQYALGIIQAQPDKSESELVNQIIEQLIKKEKVYLAWVPAHK
      |            |  |         | |             |   |       
------Q------------Q--L---------S-S-------------E---L-------
GIGGNEQVDKLVSAGIRKPISPIETVPVKLKPGMDGPKVKQWPLTEEKIKALVEICTEME
|   ||       |                          |                   
GL--NE-------A--------------------------Q-------------------
KEGKISKIGPENPYNTPVFAIKKKDSTKWRKLVDFRELNKRTQDFWEVQLGIPHPAGLKK
    | |             |       |     |   |||              |    
----I-K-------------I-------W-----F-Q-NKR--------------A----
KKSVTVLDVGDAYFSVPLDEDFRKYTAFTIPSINNETPGIRYQYNVLPQGWKGSPAIFQS
 |                     |       |        |      |       | | |
-K-------------I------KK-------S--------R------P---R-T-A-F-S
SMTKILEPFKKQNPDIVIYQYIDDLYVGSDLEIGQHRTKIEELRQHLLRWGLTTPDKKHQ
|     |            |    |                       |  |     |  
S-----E------------Q----L---A-------------------R--L-----K--
KEPPFLWMGYELHPDKWTVQPIVLPEKDSWTVNDIQKLVGKLNWASQIYPGIKVRQLSKL
 |  |                                     |                 
RE--F-------------------------------------N-----------------
LRGTKALTEVIPLTEEAELELAENREILKEPVHGVYYDPSKDLIAEIQKQGQGQWTYQIY
                      |||           |     |            |    
----------------------ENR-----------Y-----L------------T----
QEPFKNLKTGKYARMRGAHTNDVKQLTEAVQKITTESIVIWGKTPKFKLPIQKETWETWW
 |           | |                                            
-E-----------R-R--------------------------------------------
TEYWQATWIPEWEFVNTPPLVKLWYQLEDIQMTQTTSSLSASLGDRVTISCSASQDISSY
                              |  |        |              || 
---------------------R--------Q--Q--------L--------------SS-
LNWYQQKPEGTVKLLIYYTSSLHSGVPSAFSGSGSGTDYSLTISNLEPEDFATYYCQQYS
        |            |             |    |   |   |  |     |  
--------E------------L-------------G----L---N---E--A-----Q--
KFPWTFGGGTKLEIKRADAAPTVSIFPPSSEQLTSGGASVVCFLNNFYPKDINVAWAIDG
                        |                        |       |  
------------------------I------------------------K-------I--
SAAANGVLNSWTDQDSKDSTYSMSSTLTLTADEYEAANSYTCAATHKTSTSPIVKSFNAN
          |                                                 
----------W-------------------------------------------------
ECQITLKESGPGIVQPSQPFRLTCTFSGFSLSTSGIGVTWIRQPSGKGLEWLATIWWDDD
                            |             |                 
----------------------------F-------------Q-----------------
NRYNPSLKSRLTVSKDTSNNQAFLNMMTVETADTAIYYCAQSAITSVTDSAMDHWGQGTS
   |   | |                                                  
---N---K-R--------------------------------------------------
VTVSSAATTPPSVYPLAPGSAAQTNSMVTLGCLVKGYFPEPVTVTWNSGSLSSGVHTFPA
                     |            |                         
---------------------A------------K-------------------------
VLQSDLYTLSSSVTVPSSTWPSETVTCNVAHPASSTKVDKKI
                                    |  |  
----------------------------I-------K--KS-
1j5o 1hdd  101 1422  114   7.10
PISPIETVPVKLKPGMDGPKVKQWPLTEEKIKALVEICTEMEKEGKISKIGPENPYNTPV
                                        |                   
----------------------------------------M-------------------
FAIKKKDSTKWRKLVDFRELNKRTQDFWEVQLGIPHPAGLKKKKSVTVLDVGDAYFSVPL
                            |          |   |                
----------------------------E----------L---K----------------
DEDFRKYTAFTIPSINNETPGIRYQYNVLPQGWKGSPAIFQSSMTKILEPFKKQNPDIVI
    ||    |       |       |          |                      
----RK----T-------T-------N----------A----------------------
YQYIDDLYVGSDLEIGQHRTKIEELRQHLLRWGLTTPDKKHQKEPPFLWMGYELHPDKWT
           |             |    |                             
-----------D-------------R----R-----------------------------
VQPIVLPEKDSWTVNDIQKLVGKLNWASQIYPGIKVRQLSKLLRGTKALTEVIPLTEEAE
                      |   |                    |       |    
----------------------K---A--------------------A-------T----
LELAENREILKEPVHGVYYDPSKDLIAEIQKQGQGQWTYQIYQEPFKNLKTGKYARMRGA
      |                                    |           | |  
--M---R------------------------------------E-----------R-R--
HTNDVKQLTEAVQKITTESIVIWGKTPKFKLPIQKETWETWWTEYWQATWIPEWEFVNTP
       |          |               |                     ||  
-----R-L----------S---------------K---------------------VN--
PLVKLWYQLEKEPIVGAETFYVDGAANRETKLGKAGYVTNKGRQKVVPLTNTTNQKTELQ
           |    |  |        || |        | |                 
-----------E----A--F--------ET-L--------K-R-----------------
AIYLALQDSGLEVNIVTDSQYALGIIQAQPDKSESELVNQIIEQLIKKEKVYLAWVPAHK
        |       |               | |   |                 |   
--------S-------T---------------S-S---N-----------------P---
GIGGNEQVDKLVSAGIRKPISPIETVPVKLKPGMDGPKVKQWPLTEEKIKALVEICTEME
    | |         |            |            |      |  |       
----N-Q---------R------------L------------P------K--V-------
KEGKISKIGPENPYNTPVFAIKKKDSTKWRKLVDFRELNKRTQDFWEVQLGIPHPAGLKK
          |         |          |   |  |                     
----------E---------I----------L---R--N---------------------
KKSVTVLDVGDAYFSVPLDEDFRKYTAFTIPSINNETPGIRYQYNVLPQGWKGSPAIFQS
           |          | |       |  |  |       | |      |    
-----------A---I------R-Y-------I--E--G-------L-Q------A----
SMTKILEPFKKQNPDIVIYQYIDDLYVGSDLEIGQHRTKIEELRQHLLRWGLTTPDKKHQ
                                              |||           
----------------------------------------------LLR-----------
KEPPFLWMGYELHPDKWTVQPIVLPEKDSWTVNDIQKLVGKLNWASQIYPGIKVRQLSKL
              |  |            |           | |         |     
--------------D--T------------T-----------N-A-D-------R-----
LRGTKALTEVIPLTEEAELELAENREILKEPVHGVYYDPSKDLIAEIQKQGQGQWTYQIY
 |  ||       |          |                                   
-R--KA---A---T------M---R-----------------------------------
QEPFKNLKTGKYARMRGAHTNDVKQLTEAVQKITTESIVIWGKTPKFKLPIQKETWETWW
 |           | |         |          |                       
-E-----------R-R-------R-L----------S-----------------------
TEYWQATWIPEWEFVNTPPLVKLWYQLEDIQMTQTTSSLSASLGDRVTISCSASQDISSY
                     |                        |             
---------------------K------------------------V-------------
LNWYQQKPEGTVKLLIYYTSSLHSGVPSAFSGSGSGTDYSLTISNLEPEDFATYYCQQYS
 |      |                   ||                  |           
-N------E-------------------AF------------------E-----------
KFPWTFGGGTKLEIKRADAAPTVSIFPPSSEQLTSGGASVVCFLNNFYPKDINVAWAIDG
         | |  ||             |   ||   |      |  |           
---------T-L--KR-------------S---TS---S------N--P-----------
SAAANGVLNSWTDQDSKDSTYSMSSTLTLTADEYEAANSYTCAATHKTSTSPIVKSFNAN
        |    |              |                      |  |     
--------N----Q--R-----------L----------------------P--K-----
ECQITLKESGPGIVQPSQPFRLTCTFSGFSLSTSGIGVTWIRQPSGKGLEWLATIWWDDD
       |    |                 |          |          | |     
---V---E----I-----------------L----------R--N-------A-I-----
NRYNPSLKSRLTVSKDTSNNQAFLNMMTVETADTAIYYCAQSAITSVTDSAMDHWGQGTS
 ||                          |                           |  
-RY-------------------------IE---------------------------G--
VTVSSAATTPPSVYPLAPGSAAQTNSMVTLGCLVKGYFPEPVTVTWNSGSLSSGVHTFPA
               |      |                                    |
---------------L------Q------------------------------------A
VLQSDLYTLSSSVTVPSSTWPSETVTCNVAHPASSTKVDKKI
     |  |                             |   
-----L--L---------------------------R-D---
1j5o 1mdy  118 1422  130   8.30
PISPIETVPVKLKPGMDGPKVKQWPLTEEKIKALVEICTEMEKEGKISKIGPENPYNTPV
                                                            
------------------------------------------------------------
FAIKKKDSTKWRKLVDFRELNKRTQDFWEVQLGIPHPAGLKKKKSVTVLDVGDAYFSVPL
       |                         |                      |   
-------S-------------------------I----------------------S---
DEDFRKYTAFTIPSINNETPGIRYQYNVLPQGWKGSPAIFQSSMTKILEPFKKQNPDIVI
             |        |    |                        |       
-------------S--------R----V------------------------K-------
YQYIDDLYVGSDLEIGQHRTKIEELRQHLLRWGLTTPDKKHQKEPPFLWMGYELHPDKWT
          |         |         |                             
----------S---------K---------R-----------------------------
VQPIVLPEKDSWTVNDIQKLVGKLNWASQIYPGIKVRQLSKLLRGTKALTEVIPLTEEAE
                || | | ||            |                    | 
----------------IQ-L-G-LN------------Q--------------------A-
LELAENREILKEPVHGVYYDPSKDLIAEIQKQGQGQWTYQIYQEPFKNLKTGKYARMRGA
 |||      |     |                 |               |         
-ELA---Q--K-----V-----------------G---------------T---------
HTNDVKQLTEAVQKITTESIVIWGKTPKFKLPIQKETWETWWTEYWQATWIPEWEFVNTP
 |    |     |     |                               |   |     
-T----Q-----Q-----S-------------------------------I---E-----
PLVKLWYQLEKEPIVGAETFYVDGAANRETKLGKAGYVTNKGRQKVVPLTNTTNQKTELQ
       ||        |        |     ||    | | |    |            
-------QL--------E--------N-----GK----T-K-R----P-------R----
AIYLALQDSGLEVNIVTDSQYALGIIQAQPDKSESELVNQIIEQLIKKEKVYLAWVPAHK
                      |      |                  |   |    |  
--------------------F-L------P------------------E---L----A--
GIGGNEQVDKLVSAGIRKPISPIETVPVKLKPGMDGPKVKQWPLTEEKIKALVEICTEME
            ||               |     |                |       
------------SA---------------L-----G----------------V-------
KEGKISKIGPENPYNTPVFAIKKKDSTKWRKLVDFRELNKRTQDFWEVQLGIPHPAGLKK
     |           |      |   |  |     ||                 |   
-----S-----------V------D---W--L-----LN-----------------G---
KKSVTVLDVGDAYFSVPLDEDFRKYTAFTIPSINNETPGIRYQYNVLPQGWKGSPAIFQS
    |         |              | |        |    |              
----T---------S--------------I-S----S---R----V--------------
SMTKILEPFKKQNPDIVIYQYIDDLYVGSDLEIGQHRTKIEELRQHLLRWGLTTPDKKHQ
          |                 |         |         |           
----------K-----------------S---------K---------R-----------
KEPPFLWMGYELHPDKWTVQPIVLPEKDSWTVNDIQKLVGKLNWASQIYPGIKVRQLSKL
                                  || | | ||            |    
----------------------------------IQ-L-G-LN------------Q----
LRGTKALTEVIPLTEEAELELAENREILKEPVHGVYYDPSKDLIAEIQKQGQGQWTYQIY
                                            |               
--------------------------------------------A---------------
QEPFKNLKTGKYARMRGAHTNDVKQLTEAVQKITTESIVIWGKTPKFKLPIQKETWETWW
 |                       |  | ||      |  |                  
-E-----------------------L--A-QK------V--G------------------
TEYWQATWIPEWEFVNTPPLVKLWYQLEDIQMTQTTSSLSASLGDRVTISCSASQDISSY
                                   |           |            
-----------------------------------T-----------T------------
LNWYQQKPEGTVKLLIYYTSSLHSGVPSAFSGSGSGTDYSLTISNLEPEDFATYYCQQYS
    ||                                 |  |     |        |  
----QQ---------------------------------S--I-----E--------Q--
KFPWTFGGGTKLEIKRADAAPTVSIFPPSSEQLTSGGASVVCFLNNFYPKDINVAWAIDG
           |                  |                             
-----------L------------------E-----------------------------
SAAANGVLNSWTDQDSKDSTYSMSSTLTLTADEYEAANSYTCAATHKTSTSPIVKSFNAN
    ||                                        |  |    |     
----NG----------------------------------------K--T----K-----
ECQITLKESGPGIVQPSQPFRLTCTFSGFSLSTSGIGVTWIRQPSGKGLEWLATIWWDDD
                  | |       | |            |     | ||       
------R-----------P-R-------F-L------------P-----E-LA-------
NRYNPSLKSRLTVSKDTSNNQAFLNMMTVETADTAIYYCAQSAITSVTDSAMDHWGQGTS
                 |   | |    |                ||     | |     
-----------------S---A-LG---V----------------SV-----D-W-----
VTVSSAATTPPSVYPLAPGSAAQTNSMVTLGCLVKGYFPEPVTVTWNSGSLSSGVHTFPA
                             |  |             |      |      
-----------------------------L--L-------------N------G------
VLQSDLYTLSSSVTVPSSTWPSETVTCNVAHPASSTKVDKKI
                                   |      
-----------------------------------T------
1j5o 1per  120 1422  126   8.44
PISPIETVPVKLKPGMDGPKVKQWPLTEEKIKALVEICTEMEKEGKISKIGPENPYNTPV
                                                            
------------------------------------------------------------
FAIKKKDSTKWRKLVDFRELNKRTQDFWEVQLGIPHPAGLKKKKSVTVLDVGDAYFSVPL
                                                            
------------------------------------------------------------
DEDFRKYTAFTIPSINNETPGIRYQYNVLPQGWKGSPAIFQSSMTKILEPFKKQNPDIVI
                                                       |    
-------------------------------------------------------P----
YQYIDDLYVGSDLEIGQHRTKIEELRQHLLRWGLTTPDKKHQKEPPFLWMGYELHPDKWT
                              |                             
------------------------------R-----------------------------
VQPIVLPEKDSWTVNDIQKLVGKLNWASQIYPGIKVRQLSKLLRGTKALTEVIPLTEEAE
                                |      |                    
--------------------------------G------S--------------------
LELAENREILKEPVHGVYYDPSKDLIAEIQKQGQGQWTYQIYQEPFKNLKTGKYARMRGA
   |     |           |                                      
---A-----L-----------S--------------------------------------
HTNDVKQLTEAVQKITTESIVIWGKTPKFKLPIQKETWETWWTEYWQATWIPEWEFVNTP
   |                                                        
---D--------------------------------------------------------
PLVKLWYQLEKEPIVGAETFYVDGAANRETKLGKAGYVTNKGRQKVVPLTNTTNQKTELQ
                  |         |             |                 
------------------T---------E-------------R-----------------
AIYLALQDSGLEVNIVTDSQYALGIIQAQPDKSESELVNQIIEQLIKKEKVYLAWVPAHK
                                                         |  
---------------------------------------------------------A--
GIGGNEQVDKLVSAGIRKPISPIETVPVKLKPGMDGPKVKQWPLTEEKIKALVEICTEME
      |                      |    |                 |     | 
------Q----------------------L----D-----------------V-----M-
KEGKISKIGPENPYNTPVFAIKKKDSTKWRKLVDFRELNKRTQDFWEVQLGIPHPAGLKK
                                                            
------------------------------------------------------------
KKSVTVLDVGDAYFSVPLDEDFRKYTAFTIPSINNETPGIRYQYNVLPQGWKGSPAIFQS
                       |                      |             
-----------------------K----------------------L-------------
SMTKILEPFKKQNPDIVIYQYIDDLYVGSDLEIGQHRTKIEELRQHLLRWGLTTPDKKHQ
     |      |             | |                      |      | 
-----L------N-------------V-S----------------------L------H-
KEPPFLWMGYELHPDKWTVQPIVLPEKDSWTVNDIQKLVGKLNWASQIYPGIKVRQLSKL
 |     |                                                    
-E-----M----------------------------------------------------
LRGTKALTEVIPLTEEAELELAENREILKEPVHGVYYDPSKDLIAEIQKQGQGQWTYQIY
                                       |                    
---------------------------------------S--------------------
QEPFKNLKTGKYARMRGAHTNDVKQLTEAVQKITTESIVIWGKTPKFKLPIQKETWETWW
               |                                            
---------------R--------------------------------------------
TEYWQATWIPEWEFVNTPPLVKLWYQLEDIQMTQTTSSLSASLGDRVTISCSASQDISSY
                     |       |           |   |              
---------------------K-------I-----------S---R--------------
LNWYQQKPEGTVKLLIYYTSSLHSGVPSAFSGSGSGTDYSLTISNLEPEDFATYYCQQYS
                                                           |
-----------------------------------------------------------S
KFPWTFGGGTKLEIKRADAAPTVSIFPPSSEQLTSGGASVVCFLNNFYPKDINVAWAIDG
               |                                            
---------------R--------------------------------------------
SAAANGVLNSWTDQDSKDSTYSMSSTLTLTADEYEAANSYTCAATHKTSTSPIVKSFNAN
                                             |              
---------------------------------------------H--------------
ECQITLKESGPGIVQPSQPFRLTCTFSGFSLSTSGIGVTWIRQPSGKGLEWLATIWWDDD
 |          |       |                |                      
-C----------I-------R----------------V----------------------
NRYNPSLKSRLTVSKDTSNNQAFLNMMTVETADTAIYYCAQSAITSVTDSAMDHWGQGTS
  |       |   |                                     |       
--Y-------L---K-------------------------------------D-------
VTVSSAATTPPSVYPLAPGSAAQTNSMVTLGCLVKGYFPEPVTVTWNSGSLSSGVHTFPA
          | |            |          |                |      
----------P-V------------S----------Y----------------G------
VLQSDLYTLSSSVTVPSSTWPSETVTCNVAHPASSTKVDKKI
                         |        |       
-------------------------T--------S-------
1j5o 1tc3   51 1422   51   3.59
PISPIETVPVKLKPGMDGPKVKQWPLTEEKIKALVEICTEMEKEGKISKIGPENPYNTPV
                         ||     |   |                      |
--A----------------------LT----NA--QI---------LA-----------V
FAIKKKDSTKWRKLVDFRELNKRTQDFWEVQLGIPHPAGLKKKKSVTVLDVGDAYFSVPL
  |   ||  |       |         |                 |   ||   |  | 
--I---DS--W-------E---------E-----------------T---VGQ--F--P-
DEDFRKYTAFTIPSINNETPGIRYQYNVLPQGWKGSPAIFQSSMTKILEPFKKQNPDIVI
              |   |        | | |  |                         
-----------V--I---T----H-H-V-PLG--G-------------------------
YQYIDDLYVGSDLEIGQHRTKIEELRQHLLRWGLTTPDKKHQKEPPFLWMGYELHPDKWT
         |  |  |   |             |      |          ||       
---------G--LQ-G---T-------------L------H--------C-YE-------
VQPIVLPEKDSWTVNDIQKLVGKLNWASQIYPGIKVRQLSKLLRGTKALTEVIPLTEEAE
   |  |                |  |   | |  |        |               
---I--P----------------L--AAP-Y-G--V--------G---------------
LELAENREILKEPVHGVYYDPSKDLIAEIQKQGQGQWTYQIYQEPFKNLKTGKYARMRGA
   | |         |    |               |  | |    |   |         
--FAKN---------G----PT--------R-----W--Q-Y----K--RT-----I---
HTNDVKQLTEAVQKITTESIVIWGKTPKFKLPIQKETWETWWTEYWQATWIPEWEFVNTP
  |   |    |          ||                        |  |   |    
--N---QV---VHR--------WG------------------S-H---T-VP---F----
PLVKLWYQLEKEPIVGAETFYVDGAANRETKLGKAGYVTNKGRQKVVPLTNTTNQKTELQ
    |   |  ||         |   |            | |  |      |    |   
----L---L--EP---------D---N----------I-N-G--K------TC---T---
AIYLALQDSGLEVNIVTDSQYALGIIQAQPDKSESELVNQIIEQLIKKEKVYLAWVPAHK
|  |         |  |            |              |       | |     
ASHLC------H-N--T--R-C----H-NP--------------L------HLCW-----
GIGGNEQVDKLVSAGIRKPISPIETVPVKLKPGMDGPKVKQWPLTEEKIKALVEICTEME
     |  |                     |    |     |             |    
-----ESLD--------------D----N-K----G---RNW-------------C----
KEGKISKIGPENPYNTPVFAIKKKDSTKWRKLVDFRELNKRTQDFWEVQLGIPHPAGLKK
        || |     | |            |    |  |       | |   |     
------P-GP-NG-GC-VHAV-----------V-C--L--R-------Q-G---P-----
KKSVTVLDVGDAYFSVPLDEDFRKYTAFTIPSINNETPGIRYQYNVLPQGWKGSPAIFQS
      |     |   |         | |        |    |     |   ||   |  
------L-----Y-G-P---G-----A-TV-A--G--P----Q-----Q--RGS-H-FVV
SMTKILEPFKKQNPDIVIYQYIDDLYVGSDLEIGQHRTKIEELRQHLLRWGLTTPDKKHQ
  |         |      | |  |              |         |          
ALT---------N---A--Q-I--L---A---V------I-D--S----W---------E
KEPPFLWMGYELHPDKWTVQPIVLPEKDSWTVNDIQKLVGKLNWASQIYPGIKVRQLSKL
 |      |    |    |  |        |      | |          |    |    
-E---T-VG-QF-P----V--I--------T-HHV-PL-G-----G----GL---Q----
LRGTKALTEVIPLTEEAELELAENREILKEPVHGVYYDPSKDLIAEIQKQGQGQWTYQIY
  ||    | |||   |    |        |     |               |       
--GTLHCYE-IPL---A----A--------P-----Y---------------G-----V-
QEPFKNLKTGKYARMRGAHTNDVKQLTEAVQKITTESIVIWGKTPKFKLPIQKETWETWW
         |  |       |                    |       |    |    |
---------G-FA--K----N--------------------G-------P----T-R--W
TEYWQATWIPEWEFVNTPPLVKLWYQLEDIQMTQTTSSLSASLGDRVTISCSASQDISSY
  |                  |                       | |        |   
-QY------------------K-----------------------R-T--------I---
LNWYQQKPEGTVKLLIYYTSSLHSGVPSAFSGSGSGTDYSLTISNLEPEDFATYYCQQYS
 |   |     |          |                                     
-N---Q-----V---V------H-------------------------------------
KFPWTFGGGTKLEIKRADAAPTVSIFPPSSEQLTSGGASVVCFLNNFYPKDINVAWAIDG
   |  |  |          |    |      |          |    | | |    |  
R--W--GSHT---V------P----F------L----------L-E--P-D-N----I--
SAAANGVLNSWTDQDSKDSTYSMSSTLTLTADEYEAANSYTCAATHKTSTSPIVKSFNAN
    ||          |          | |      | |  |   |   |          
----NG----------K----------TCT------A-SHLC---H--NT----R-----
ECQITLKESGPGIVQPSQPFRLTCTFSGFSLSTSGIGVTWIRQPSGKGLEWLATIWWDDD
 |        |          | |               |    |      |      ||
-C-----HN-P-L-------HL-C---------------W--E-S------L------DD
NRYNPSLKSRLTVSKDTSNNQAFLNMMTVETADTAIYYCAQSAITSVTDSAMDHWGQGTS
   |   | |              |                             |     
---N---KGR--------------N-----------------------------W-----
VTVSSAATTPPSVYPLAPGSAAQTNSMVTLGCLVKGYFPEPVTVTWNSGSLSSGVHTFPA
              |  |      |     || |       | |      |  |    | 
------C-------P-GP------NG----GC-V--H---AV-V-----CLRQG----P-
VLQSDLYTLSSSVTVPSSTWPSETVTCNVAHPASSTKVDKKI
     ||      ||     |         |      |    
-----LY--GPGATV-AG--PQQ--R-G-SH----F-V---V
1j5o 1a74  199 1422  324  13.99
PISPIETVPVKLKPGMDGPKVKQWPLTEEKIKALVEICTEMEKEGKISKIGPENPYNTPV
            |   |                |                         |
------------K---D----------------L-------------------------V
FAIKKKDSTKWRKLVDFRELNKRTQDFWEVQLGIPHPAGLKKKKSVTVLDVGDAYFSVPL
      | |              |    |                         |    |
------D-T--------------T----E-------------------M-----Y----L
DEDFRKYTAFTIPSINNETPGIRYQYNVLPQGWKGSPAIFQSSMTKILEPFKKQNPDIVI
    |             |  |   |                      |           
----R-------------T--I---Y----------------------E-----------
YQYIDDLYVGSDLEIGQHRTKIEELRQHLLRWGLTTPDKKHQKEPPFLWMGYELHPDKWT
            |         ||                   |      |         
------------L---------EE-------------------E------G---------
VQPIVLPEKDSWTVNDIQKLVGKLNWASQIYPGIKVRQLSKLLRGTKALTEVIPLTEEAE
    |       |                  |          ||                
----V-------T------------------P----------LR----------------
LELAENREILKEPVHGVYYDPSKDLIAEIQKQGQGQWTYQIYQEPFKNLKTGKYARMRGA
   |  |                  ||                |             |  
---A--R------------------IA----------------E-------------R--
HTNDVKQLTEAVQKITTESIVIWGKTPKFKLPIQKETWETWWTEYWQATWIPEWEFVNTP
       | |  |     |    |       |                |       |   
-------L-E--Q-----S----G-------P----------------T-------V-S-
PLVKLWYQLEKEPIVGAETFYVDGAANRETKLGKAGYVTNKGRQKVVPLTNTTNQKTELQ
       |          |  |            |       |              |  
-------Q----------T--V------------A-------R-----M--------E--
AIYLALQDSGLEVNIVTDSQYALGIIQAQPDKSESELVNQIIEQLIKKEKVYLAWVPAHK
       | || |  |           |      |                         
------RD-GL-V--V---------V-A------S-------------------------
GIGGNEQVDKLVSAGIRKPISPIETVPVKLKPGMDGPKVKQWPLTEEKIKALVEICTEME
        |       |   |        |          |                 | 
--------D-------R---S--------L----------Q-----------------M-
KEGKISKIGPENPYNTPVFAIKKKDSTKWRKLVDFRELNKRTQDFWEVQLGIPHPAGLKK
               ||                        |              |   
---------------TP------------------------T--------------G---
KKSVTVLDVGDAYFSVPLDEDFRKYTAFTIPSINNETPGIRYQYNVLPQGWKGSPAIFQS
    | |    |             ||                  |              
-R--T-L----A-------------TA------------------V--------------
SMTKILEPFKKQNPDIVIYQYIDDLYVGSDLEIGQHRTKIEELRQHLLRWGLTTPDKKHQ
 |                                  | |      |  |           
-M----------------------------------R-K------H--R-----------
KEPPFLWMGYELHPDKWTVQPIVLPEKDSWTVNDIQKLVGKLNWASQIYPGIKVRQLSKL
     |    |            |      |  |             |   |        
-----L--A-E----R-----L-L------T--D-------------I---I--------
LRGTKALTEVIPLTEEAELELAENREILKEPVHGVYYDPSKDLIAEIQKQGQGQWTYQIY
  |   |   |            |    |  ||    |      |         |     
--G---L-D-I------------N----K--VH----D---E--A-C-R-----W-----
QEPFKNLKTGKYARMRGAHTNDVKQLTEAVQKITTESIVIWGKTPKFKLPIQKETWETWW
 |            |      |     | |     |            |   |       
-E---------HV-M-----SD-----E-V-----E---------R-RL-V-K-------
TEYWQATWIPEWEFVNTPPLVKLWYQLEDIQMTQTTSSLSASLGDRVTISCSASQDISSY
              |    | |      |            |   |              
--------------V----L-K------DV-----------S---R--------------
LNWYQQKPEGTVKLLIYYTSSLHSGVPSAFSGSGSGTDYSLTISNLEPEDFATYYCQQYS
                       |  |  |     |        |  |            
-----------------------S--P--F-----G--------N--P------------
KFPWTFGGGTKLEIKRADAAPTVSIFPPSSEQLTSGGASVVCFLNNFYPKDINVAWAIDG
  |     |  |     |            | |   |                |   |  
-IP-----G--L-----D------------E-L---G----------------V---I--
SAAANGVLNSWTDQDSKDSTYSMSSTLTLTADEYEAANSYTCAATHKTSTSPIVKSFNAN
      |      |                                      |      |
------V------Q--------------------------------------I------N
ECQITLKESGPGIVQPSQPFRLTCTFSGFSLSTSGIGVTWIRQPSGKGLEWLATIWWDDD
       |    |               |             |      |          
-------E----I---------------F-------------Q-----VE----------
NRYNPSLKSRLTVSKDTSNNQAFLNMMTVETADTAIYYCAQSAITSVTDSAMDHWGQGTS
           |   |    | |          |      |           |       
-----------T---D----Q-F----------T------Q--L-------LD-------
VTVSSAATTPPSVYPLAPGSAAQTNSMVTLGCLVKGYFPEPVTVTWNSGSLSSGVHTFPA
                     |           |     |          |         
---------------------A-----------V-----E----------L---------
VLQSDLYTLSSSVTVPSSTWPSETVTCNVAHPASSTKVDKKI
 |  |   |                    ||    |     |
-L-DD---L--------------------AH----T-I--RI
1j5o 1c0w  146 1422  173  10.27
PISPIETVPVKLKPGMDGPKVKQWPLTEEKIKALVEICTEMEKEGKISKIGPENPYNTPV
           |    |         |             || |     |          
-----D-----L---VD--RL-N---T--TFR-------QMEQE--LA-I----------
FAIKKKDSTKWRKLVDFRELNKRTQDFWEVQLGIPHPAGLKKKKSVTVLDVGDAYFSVPL
||                 |        | |    |       |    | |  |      
FA-----A----------HL--------E-Q----H-------K---LL-V--A------
DEDFRKYTAFTIPSINNETPGIRYQYNVLPQGWKGSPAIFQSSMTKILEPFKKQNPDIVI
    |    |   |     |       |     |           |  |     ||    
----R---VF---SL----P----E--V-----K-----------K--E--DEHNP----
YQYIDDLYVGSDLEIGQHRTKIEELRQHLLRWGLTTPDKKHQKEPPFLWMGYELHPDKWT
            |     |  | |  |             |      |  |         
------------L----NR--I-EVKQ-------------H------L--G---------
VQPIVLPEKDSWTVNDIQKLVGKLNWASQIYPGIKVRQLSKLLRGTKALTEVIPLTEEAE
              ||          |          | |              |   | 
--------------ND----------A----------Q-S--------------L---A-
LELAENREILKEPVHGVYYDPSKDLIAEIQKQGQGQWTYQIYQEPFKNLKTGKYARMRGA
  |   |       |         |   |  | | |       |   |         |  
--L---R-------H---F---RHLF--I--Q-Q-Q-S-----E---N---------R--
HTNDVKQLTEAVQKITTESIVIWGKTPKFKLPIQKETWETWWTEYWQATWIPEWEFVNTP
     |    |                                    |            
-SS--K----A------------------------------------A------------
PLVKLWYQLEKEPIVGAETFYVDGAANRETKLGKAGYVTNKGRQKVVPLTNTTNQKTELQ
  |     |   |  |     |         |    |      |  |             
--VR----L---P--G-----V---------L--C-Y------Q--V-------------
AIYLALQDSGLEVNIVTDSQYALGIIQAQPDKSESELVNQIIEQLIKKEKVYLAWVPAHK
       |     |    || |     |        ||   | |              | 
-------D-----NL---SQ-A-----A--------LVSH-I-Q--------------H-
GIGGNEQVDKLVSAGIRKPISPIETVPVKLKPGMDGPKVKQWPLTEEKIKALVEICTEME
 |  |    ||      |      |                    |  |   |   |   
-I--N----KL------K--T---T----------------F---EH-I---V---T-V-
KEGKISKIGPENPYNTPVFAIKKKDSTKWRKLVDFRELNKRTQDFWEVQLGIPHPAGLKK
 |   |      |  |   |         |    | |        | |     |      
-E---SEL----P--T---A-----A---R----F-E--------W-V-----H------
KKSVTVLDVGDAYFSVPLDEDFRKYTAFTIPSINNETPGIRYQYNVLPQGWKGSPAIFQS
                      |              ||       |         |   
----------------------R-H-------L----PG-------L---------I---
SMTKILEPFKKQNPDIVIYQYIDDLYVGSDLEIGQHRTKIEELRQHLLRWGLTTPDKKHQ
  |  |      |            |          ||             | |      
--T--L------N---A--------Y----------RT-------------L-T------
KEPPFLWMGYELHPDKWTVQPIVLPEKDSWTVNDIQKLVGKLNWASQIYPGIKVRQLSKL
           || |         |     |        |   ||      |        
-------V---LH-D---------P---A-T---L-RF-G---WANK-H--I-I------
LRGTKALTEVIPLTEEAELELAENREILKEPVHGVYYDPSKDLIAEIQKQGQGQWTYQIY
    |                  |   |    |        |   |              
----K------------------N---L----H-------RD---E------------V-
QEPFKNLKTGKYARMRGAHTNDVKQLTEAVQKITTESIVIWGKTPKFKLPIQKETWETWW
      |          |      || |   |    |     | |    |     | |  
------L----------A------QL-E---K----S--L--KSPRSVAP-----W-T--
TEYWQATWIPEWEFVNTPPLVKLWYQLEDIQMTQTTSSLSASLGDRVTISCSASQDISSY
 |        ||         |    ||                 |              
RE--------EWQ--R-----K----LE-----------------R---------E----
LNWYQQKPEGTVKLLIYYTSSLHSGVPSAFSGSGSGTDYSLTISNLEPEDFATYYCQQYS
   | |         |            |                | |   |        
---Y-Q--D------I------------A--------------A-L-PQN-A--------
KFPWTFGGGTKLEIKRADAAPTVSIFPPSSEQLTSGGASVVCFLNNFYPKDINVAWAIDG
          || |||    | |    |         |               | |    
----------KLKIKR----P-VKV-QP----I----A-----------R---V-W-Y--
SAAANGVLNSWTDQDSKDSTYSMSSTLTLTADEYEAANSYTCAATHKTSTSPIVKSFNAN
     |      ||  |                   |    |       | |      | 
----KG------DQ--K-------Q---V---QH--A----C------PT-PLI----A-
ECQITLKESGPGIVQPSQPFRLTCTFSGFSLSTSGIGVTWIRQPSGKGLEWLATIWWDDD
     |      |       |      |        ||     |   | | |        
-----L------I---N---R---D-NG-----A--GV-----PD-VG-E-L--L-----
NRYNPSLKSRLTVSKDTSNNQAFLNMMTVETADTAIYYCAQSAITSVTDSAMDHWGQGTS
| |            |               ||       |            |      
N-Y------------D---------------ADN-V----Q------------H--R---
VTVSSAATTPPSVYPLAPGSAAQTNSMVTLGCLVKGYFPEPVTVTWNSGSLSSGVHTFPA
             |   |   ||      |          |         |    |    
-------------Y--KP-Q-AQ--PL-RL--II------P-----R---L----H----
VLQSDLYTLSSSVTVPSSTWPSETVTCNVAHPASSTKVDKKI
     ||                     |   |     |   
-----LY---------------------V---A-----D---
1j5o 1ecr  201 1422  305  14.14
PISPIETVPVKLKPGMDGPKVKQWPLTEEKIKALVEICTEMEKEGKISKIGPENPYNTPV
                                                        |   
--------------------------------------------------------N---
FAIKKKDSTKWRKLVDFRELNKRTQDFWEVQLGIPHPAGLKKKKSVTVLDVGDAYFSVPL
      |        |            ||              |       ||      
------D--------D---I--------EVE-------------S-------DA------
DEDFRKYTAFTIPSINNETPGIRYQYNVLPQGWKGSPAIFQSSMTKILEPFKKQNPDIVI
|   |   |                 |          |                      
DK--R---A--------------H-HN----------A----------------------
YQYIDDLYVGSDLEIGQHRTKIEELRQHLLRWGLTTPDKKHQKEPPFLWMGYELHPDKWT
            ||    | |    |    |      |                |     
------------LE----R-K----R----R------D----------------H-----
VQPIVLPEKDSWTVNDIQKLVGKLNWASQIYPGIKVRQLSKLLRGTKALTEVIPLTEEAE
   |    |      |           |           |  ||                
---I----K------D-----------S--F------H-S--LR----------------
LELAENREILKEPVHGVYYDPSKDLIAEIQKQGQGQWTYQIYQEPFKNLKTGKYARMRGA
                |   ||  |        ||        |        | |  |  
----DS----------V---PS--L--------QG--------E--------K-A-SR--
HTNDVKQLTEAVQKITTESIVIWGKTPKFKLPIQKETWETWWTEYWQATWIPEWEFVNTP
          | |        |        |   |            ||     |     
----------A-Q--------I--------L--DK------------AT-----E-----
PLVKLWYQLEKEPIVGAETFYVDGAANRETKLGKAGYVTNKGRQKVVPLTNTTNQKTELQ
      |      |      |      |              | |        |      
------Y------I---Q--YM-----R--------------R-K--------N------
AIYLALQDSGLEVNIVTDSQYALGIIQAQPDKSESELVNQIIEQLIKKEKVYLAWVPAHK
                |                                         | 
--H-------------T-----------------------------------------H-
GIGGNEQVDKLVSAGIRKPISPIETVPVKLKPGMDGPKVKQWPLTEEKIKALVEICTEME
      |                           |                         
------Q----------------Q----------D-------------------------
KEGKISKIGPENPYNTPVFAIKKKDSTKWRKLVDFRELNKRTQDFWEVQLGIPHPAGLKK
                    |   |        |   | ||       |           
--------------------I---D--------D---L-KR-------Q----N------
KKSVTVLDVGDAYFSVPLDEDFRKYTAFTIPSINNETPGIRYQYNVLPQGWKGSPAIFQS
  |       ||      |   |   |                 |          |    
--S-------DA------DK--R---A--------------H-HN----------A----
SMTKILEPFKKQNPDIVIYQYIDDLYVGSDLEIGQHRTKIEELRQHLLRWGLTTPDKKHQ
                              ||    | |    |    |      |    
------------------------------LE----R-K----R----R------D----
KEPPFLWMGYELHPDKWTVQPIVLPEKDSWTVNDIQKLVGKLNWASQIYPGIKVRQLSKL
            |        |    |      |           |              
------------H--------I----K------D-----------S--F-----------
LRGTKALTEVIPLTEEAELELAENREILKEPVHGVYYDPSKDLIAEIQKQGQGQWTYQIY
                                |      |                    
--------------------------------H------S--------------------
QEPFKNLKTGKYARMRGAHTNDVKQLTEAVQKITTESIVIWGKTPKFKLPIQKETWETWW
      |        |     |              | |     |   |           
------L--------R-----D--------------S-V-----P--SL-----------
TEYWQATWIPEWEFVNTPPLVKLWYQLEDIQMTQTTSSLSASLGDRVTISCSASQDISSY
    |       |        |                  ||   |      |       
----QG------E--------K------------------AS---R------A-------
LNWYQQKPEGTVKLLIYYTSSLHSGVPSAFSGSGSGTDYSLTISNLEPEDFATYYCQQYS
     |                                    |  |   |          
-----Q------------------------------------I--L---D----------
KFPWTFGGGTKLEIKRADAAPTVSIFPPSSEQLTSGGASVVCFLNNFYPKDINVAWAIDG
              |    | |        |                |         |  
--------------K----A-T--------E----------------Y---------I--
SAAANGVLNSWTDQDSKDSTYSMSSTLTLTADEYEAANSYTCAATHKTSTSPIVKSFNAN
             |      | |                                     
-------------Q------Y-M-------------------------------------
ECQITLKESGPGIVQPSQPFRLTCTFSGFSLSTSGIGVTWIRQPSGKGLEWLATIWWDDD
                    |                    |    |             
--------------------R--------------------R----K-------------
NRYNPSLKSRLTVSKDTSNNQAFLNMMTVETADTAIYYCAQSAITSVTDSAMDHWGQGTS
|               |   |           |          |    |   |       
N-H-------------T--HQ--------Q--D----------I----D---D-------
VTVSSAATTPPSVYPLAPGSAAQTNSMVTLGCLVKGYFPEPVTVTWNSGSLSSGVHTFPA
                                | |                         
--------------------------------L-K--------------------R----
VLQSDLYTLSSSVTVPSSTWPSETVTCNVAHPASSTKVDKKI
  |                        |              
--Q------------------------N--------------
1j5o 1hlo  127 1422  153   8.93
PISPIETVPVKLKPGMDGPKVKQWPLTEEKIKALVEICTEMEKEGKISKIGPENPYNTPV
     |      |     |            |     |                    | 
----ME------K-----P----Y-------K-----C--------------------P-
FAIKKKDSTKWRKLVDFRELNKRTQDFWEVQLGIPHPAGLKKKKSVTVLDVGDAYFSVPL
                            |         |    |            |   
----------------------------E--------CG----K------------S---
DEDFRKYTAFTIPSINNETPGIRYQYNVLPQGWKGSPAIFQSSMTKILEPFKKQNPDIVI
         |                         |    |||           |     
---------F-------------------------S----QSS-----------N-----
YQYIDDLYVGSDLEIGQHRTKIEELRQHLLRWGLTTPDKKHQKEPPFLWMGYELHPDKWT
                                 |       ||           |     
---------------------------------L-------QK-----------H-----
VQPIVLPEKDSWTVNDIQKLVGKLNWASQIYPGIKVRQLSKLLRGTKALTEVIPLTEEAE
                                     |                      
-------------------------------------Q----------------------
LELAENREILKEPVHGVYYDPSKDLIAEIQKQGQGQWTYQIYQEPFKNLKTGKYARMRGA
      |                                           |         
------R-------------------------------------------T---------
HTNDVKQLTEAVQKITTESIVIWGKTPKFKLPIQKETWETWWTEYWQATWIPEWEFVNTP
|                                                           
H-----------------------------------------------------------
PLVKLWYQLEKEPIVGAETFYVDGAANRETKLGKAGYVTNKGRQKVVPLTNTTNQKTELQ
                  |    |    |                          |    
------------------T----G----E--------------------------K----
AIYLALQDSGLEVNIVTDSQYALGIIQAQPDKSESELVNQIIEQLIKKEKVYLAWVPAHK
                             |                     |        
-----------------------------P---------------------Y--------
GIGGNEQVDKLVSAGIRKPISPIETVPVKLKPGMDGPKVKQWPLTEEKIKALVEICTEME
                                                 |     |    
-------------------------------------------------K-----C----
KEGKISKIGPENPYNTPVFAIKKKDSTKWRKLVDFRELNKRTQDFWEVQLGIPHPAGLKK
                |                             |         |   
----------------P-----------------------------E--------CG---
KKSVTVLDVGDAYFSVPLDEDFRKYTAFTIPSINNETPGIRYQYNVLPQGWKGSPAIFQS
 |            |            |                         |    | 
-K------------S------------F-------------------------S----Q-
SMTKILEPFKKQNPDIVIYQYIDDLYVGSDLEIGQHRTKIEELRQHLLRWGLTTPDKKHQ
|                           ||                     |       |
S---------------------------SD---------------------L-------Q
KEPPFLWMGYELHPDKWTVQPIVLPEKDSWTVNDIQKLVGKLNWASQIYPGIKVRQLSKL
|           |                                          |    
K-----------H------------------------------------------Q----
LRGTKALTEVIPLTEEAELELAENREILKEPVHGVYYDPSKDLIAEIQKQGQGQWTYQIY
 |           |                  |                           
-R-----------T------------------H---------------------------
QEPFKNLKTGKYARMRGAHTNDVKQLTEAVQKITTESIVIWGKTPKFKLPIQKETWETWW
        |       |                  |           | |          
--------T-------G------------------E-----------K-P----------
TEYWQATWIPEWEFVNTPPLVKLWYQLEDIQMTQTTSSLSASLGDRVTISCSASQDISSY
  |                  |                            |         
--Y------------------K----------------------------C---------
LNWYQQKPEGTVKLLIYYTSSLHSGVPSAFSGSGSGTDYSLTISNLEPEDFATYYCQQYS
                                               ||      |    
-----------------------------------------------PE------C----
KFPWTFGGGTKLEIKRADAAPTVSIFPPSSEQLTSGGASVVCFLNNFYPKDINVAWAIDG
        |     |                       |       |             
--------G-----K-----------------------S-------F-------------
SAAANGVLNSWTDQDSKDSTYSMSSTLTLTADEYEAANSYTCAATHKTSTSPIVKSFNAN
               |        |      |             |              
---------------SR-------S------D-------------H--------------
ECQITLKESGPGIVQPSQPFRLTCTFSGFSLSTSGIGVTWIRQPSGKGLEWLATIWWDDD
                                                            
------------------------------------------------------------
NRYNPSLKSRLTVSKDTSNNQAFLNMMTVETADTAIYYCAQSAITSVTDSAMDHWGQGTS
      | ||                                           |      
------L-SR-------------------------------------------H------
VTVSSAATTPPSVYPLAPGSAAQTNSMVTLGCLVKGYFPEPVTVTWNSGSLSSGVHTFPA
                      |                     |          |    
----------------------Q-----------R---------T----------H----
VLQSDLYTLSSSVTVPSSTWPSETVTCNVAHPASSTKVDKKI
  |                                       
--Q---------------------------------------
1j5o 1mey   78 1422   84   5.49
PISPIETVPVKLKPGMDGPKVKQWPLTEEKIKALVEICTEMEKEGKISKIGPENPYNTPV
      |     |   |   |           |         |             |  |
------T--I--K---D---V-----------A---------K--R-A--------N--V
FAIKKKDSTKWRKLVDFRELNKRTQDFWEVQLGIPHPAGLKKKKSVTVLDVGDAYFSVPL
       ||              |     |     |              |         
-------ST-----------T--T-----V--S--H--------------V------I--
DEDFRKYTAFTIPSINNETPGIRYQYNVLPQGWKGSPAIFQSSMTKILEPFKKQNPDIVI
     | | |       ||   |   |     |    ||      |  |           
--N--K-TRF-V-A--EET---R---NAV---W--A-AI------K--E----------L
YQYIDDLYVGSDLEIGQHRTKIEELRQHLLRWGLTTPDKKHQKEPPFLWMGYELHPDKWT
  |       |       |              |        |           |     
H-Y-SP----S--AVA--RS-------------L--------K------V--N-H-----
VQPIVLPEKDSWTVNDIQKLVGKLNWASQIYPGIKVRQLSKLLRGTKALTEVIPLTEEAE
            |         |    | |  |        ||    | |       || 
------------T---------K----S-I--G--------LL----A-T-----SSEA-
LELAENREILKEPVHGVYYDPSKDLIAEIQKQGQGQWTYQIYQEPFKNLKTGKYARMRGA
   |             |       | |               |  ||          | 
---A-------------YF--A-EII-E---------A--V--E--KN--C--F-Q-KG-
HTNDVKQLTEAVQKITTESIVIWGKTPKFKLPIQKETWETWWTEYWQATWIPEWEFVNTP
 |     |           |   |                       |     |   |  
YT-----L-----------I-L-G----------------------NA-----W---N--
PLVKLWYQLEKEPIVGAETFYVDGAANRETKLGKAGYVTNKGRQKVVPLTNTTNQKTELQ
        |||                |      | |                 ||    
-------NLEK------Q---------R------A-YL-S------M-M---A-QK---R
AIYLALQDSGLEVNIVTDSQYALGIIQAQPDKSESELVNQIIEQLIKKEKVYLAWVPAHK
       | ||       | |        |   |  |     |     |  |      | 
-V-----D-GL-L-VMC-SEY--------P---E-PLL-AMLE-----E--Y-----RH-
GIGGNEQVDKLVSAGIRKPISPIETVPVKLKPGMDGPKVKQWPLTEEKIKALVEICTEME
                   | |   | |     ||      |                  
-------------------I-PM--V-V-----MD------W------------------
KEGKISKIGPENPYNTPVFAIKKKDSTKWRKLVDFRELNKRTQDFWEVQLGIPHPAGLKK
        | |        |   |         ||      | |           |    
--------G-E--------A---K-A-------DF------T-D-----------A----
KKSVTVLDVGDAYFSVPLDEDFRKYTAFTIPSINNETPGIRYQYNVLPQGWKGSPAIFQS
   |   |   | |     |    | |           | |  |  |             
---V-I-D--NA-F-----EG--GYMA-----------G-R--Y--L-------------
SMTKILEPFKKQNPDIVIYQYIDDLYVGSDLEIGQHRTKIEELRQHLLRWGLTTPDKKHQ
    | |                          | ||    |        |         
----I-E---R----------------------G-HR----E-----I--GV-I------
KEPPFLWMGYELHPDKWTVQPIVLPEKDSWTVNDIQKLVGKLNWASQIYPGIKVRQLSKL
   |    |           |  | |      |      |    |     |   | |   
---P----G-----------P--L-ER-----N-----TG----A-----G---R-LAGF
LRGTKALTEVIPLTEEAELELAENREILKEPVHGVYYDPSKDLIAEIQKQGQGQWTYQIY
    ||        |||         | |     |   |      |        |   | 
M---KA------M-EEA---M-----I-K-----V---P------E-------SW---IV
QEPFKNLKTGKYARMRGAHTNDVKQLTEAVQKITTESIVIWGKTPKFKLPIQKETWETWW
|               |    |     |       ||    |                  
Q---------------G----D---F-E------PES----G------------------
TEYWQATWIPEWEFVNTPPLVKLWYQLEDIQMTQTTSSLSASLGDRVTISCSASQDISSY
  |  |                         | |                    | |   
--Y-RA-------------------------M-Q--------------------Q-I---
LNWYQQKPEGTVKLLIYYTSSLHSGVPSAFSGSGSGTDYSLTISNLEPEDFATYYCQQYS
|    | |              |   |         |             |    |    
LS---Q-P--------------HR--P---------T--A--V-------F----C----
KFPWTFGGGTKLEIKRADAAPTVSIFPPSSEQLTSGGASVVCFLNNFYPKDINVAWAIDG
       ||        |      |           ||   |            | | | 
-------GG--------D------IM---A--M---GA--LC------------A-A-D-
SAAANGVLNSWTDQDSKDSTYSMSSTLTLTADEYEAANSYTCAATHKTSTSPIVKSFNAN
     | |     |   |      | |      |   |               |   || 
E--M-G-LR--VPQ---D----V-S-L-I-G--YD--N---------------VR--NA-
ECQITLKESGPGIVQPSQPFRLTCTFSGFSLSTSGIGVTWIRQPSGKGLEWLATIWWDDD
                   |    |     | |     | | ||  |            |
------R----------Y-F----T-P--AL-T-----T-IHQP--K------------D
NRYNPSLKSRLTVSKDTSNNQAFLNMMTVETADTAIYYCAQSAITSVTDSAMDHWGQGTS
        | |     |    || ||      |          |  |             
--------S-L--G-ET----AF-NML-L---D-------R--I--V-NK-RE---E---
VTVSSAATTPPSVYPLAPGSAAQTNSMVTLGCLVKGYFPEPVTVTWNSGSLSSGVHTFPA
                 |    |  |             |              ||  | 
-----------------P----Q--S-------I-----E--------------VH--P-
VLQSDLYTLSSSVTVPSSTWPSETVTCNVAHPASSTKVDKKI
        |            |  |      |      |   
--R-----L-----I-ERR--S--V-AD-G-P---FR-DYR-
1j5o 1pnr  209 1422  338  14.70
-P--I-SPIET-VPV----KLKPGMD-GPKVKQWPLTEEKI-KALVEI--CT--EMEKEG
    | |            ||          |  |  ||   |        |       |
MKRYICSFADCGAAYNKNWKLQAHLSKHTGEKPFPCKEEGCEKGFTSLHHLTRHSLTHTG
-K-IS--KIGPENPYNTPVFAIKK---K-DSTKWRKLV-DFRELNKRTQDFWEVQ--L--
 |       |      |     ||        |       |          |  |  |  
EKNFTCDSDGCDLRFTTKA-NMKKHFNRFHNIKMKRYICSFADCGAAYNKNWKLQAHLSK
--G-IPHPA---GLKKK-KS---VT--VL-DVGDAYFSVPLDE-DFRKYTAFTIPS-INN
  |  | |    |  |   |    |   |   |   |    |  | |  |        | 
HTGEKPFPCKEEGCEKGFTSLHHLTRHSLTHTGEKNFTCDSDGCDLRFTTKANMKKHFNR
-ETPGI-RYQYNVLPQGWK-GSPAIFQSSMTKIL-E-PF--KKQNPD--IV-IYQYI-DD
       ||       |         |    |   | ||  |                  
FHNIKMKRYICSFADCGAAYNKNWKLQAHLSKHTGEKPFPCKEEGCEKGFTSLHHLTRHS
L-YVG-SDL--EI-G-QHR--TK--IEE-L-RQH-L-L-RW-------GLT-TPD-K-K-
|   |         |   |  ||        | |     |        |       |   
LTHTGEKNFTCDSDGCDLRFTTKANMKKHFNRFHNIKMKRYICSFADCGAAYNKNWKLQA
H-QK---EPPF-L-WMGYE--LHP-DKWTVQPIV-LPEKDSWTV-ND-IQ-KLVGKLNWA
|  |   | ||     | |         |        ||   |   |        | |  
HLSKHTGEKPFPCKEEGCEKGFTSLHHLTRHSLTHTGEK-NFTCDSDGCDLRFTTKANMK
SQI--YPGIKV-RQLSKLLR-G-----T-K--A-L---T-E-VIPLTEE-AELELAENRE
        ||  |        |       |  | |   | |   |  ||  |        
KHFNRFHNIKMKRYICSFADCGAAYNKNWKLQAHLSKHTGEKPFPCKEEGCEKGFTSLHH
ILKEPV-H-G-V-Y-YDPSK-DL-I---AEIQKQ-GQ--G----QW--TY-Q---IYQEP
       | |      |    ||     |   |                       |   
LTRHSLTHTGEKNFTCDSDGCDLRFTTKANMKKHFNRFHNIKMKRYICSFADCGAAYNKN
FK---NL-K-TG-K-Y-ARMRGAH---T--NDV-K-QLTEAVQK-ITTES--IVI-W-GK
 |    | | || |       |     |         ||    |  |  |         |
WKLQAHLSKHTGEKPFPCKEEGCEKGFTSLHHLTRHSLTHTGEKNFTCDSDGCDLRFTTK
-T-PK-F-KL-PIQ-KE---TW-E--TWWTEYW--QA-----TW---IP---E-WE--FV
    | |     |  |                |  ||     |     |   |  |  | 
ANMKKHFNRFHNIKMKRYICSFADCGAAYNKNWKLQAHLSKHTGEKPFPCKEEGCEKGFT
NTPPLVK--LWYQLEKE-PI-V-GAE----T----------F-------YV----D-GAA
    |    |    ||       |      |          |       |     | |||
SLHHLTRHSLTHTGEKNFTCDSDGCDLRFTTKANMKKHFNRFHNIKMKRYICSFADCGAA
-NRETK----LGK-AG---Y-VTNKGRQK--V-V-PLT--N-T-TNQK--T-ELQAIYLA
 |   |    | |  |         |  |       ||    | |  |  |       | 
YNKNWKLQAHLSKHTGEKPFPCKEEGCEKGFTSLHHLTRHSLTHTGEKNFTCDSDGCDLR
L-QDSGL-E-VN-I--VTDSQYALGIIQ---A-QPD-KSESELVNQIIEQ-L-IK-K--E
           |         |         |     |    |     |     |    |
FTTKANMKKHFNRFHNIKMKRYICSFADCGAAYNKNWKLQAHLSKHTGEKPFPCKEEGCE
KVY--LAWVPAHK--GIG-GN---E-Q-VD-KLVS-AGIRKPISPIETVPVK--LKPGMD
|    |     |     |  |        |      |   |          |       |
KGFTSLHHLTRHSLTHTGEKNFTCDSDGCDLRFTTKANMKKHFNRFHNIKMKRYICSFAD
-GPKV-KQWPLTEEKIKALVE--I-C-TE-MEK--EG--KISK--I---GPEN-PYNT--
 |    | | |     |   |    |  |  ||                |  |       
CGAAYNKNWKLQAHLSKHTGEKPFPCKEEGCEKGFTSLHHLTRHSLTHTGEKNFTCDSDG
-PV-F---A-IKK---K-DSTKWRKLV-DFRELNKRTQDFWEVQ--L----G-IPHPA--
    |   |  ||        |       |          |  |  |    |  | |   
CDLRFTTKANMKKHFNRFHNIKMKRYICSFADCGAAYNKNWKLQAHLSKHTGEKPFPCKE
-GLKKK-KS---VT--VL-DVGDAYFSVPLDE-DFRKYTAFTIPS-INN-ETPGI-RYQY
 |  |   |    |   |   |   |    |  | |  |        |        ||  
EGCEKGFTSLHHLTRHSLTHTGEKNFTCDSDGCDLRFTTKANMKKHFNRFHNIKMKRYIC
NVLPQGWK-GSPAIFQSSMTKIL-E-PF--KKQNPD--IV-IYQYI-DDL-YVG-SDL--
     |         |    |   | ||  |                  |   |      
SFADCGAAYNKNWKLQAHLSKHTGEKPFPCKEEGCEKGFTSLHHLTRHSLTHTGEKNFTC
EI-G-QHR--TK--IEE-L-RQH-L-L-RW-------GLT-TPD-K-K-H-QK---EPPF
   |   |  ||        | |     |        |       |   |  |   | ||
DSDGCDLRFTTKANMKKHFNRFHNIKMKRYICSFADCGAAYNKNWKLQAHLSKHTGEKPF
-L-WMGYE--LHP-DKWTVQPIV-LPEKDSWTV-ND-IQ-KLVGKLNWASQI--YPGIKV
     | |         |        ||   |   |        | |          || 
PCKEEGCEKGFTSLHHLTRHSLTHTGEK-NFTCDSDGCDLRFTTKANMKKHFNRFHNIKM
-RQLSKLLR-G-----T-K--A-L---T-E-VIPLTEE-AELELAENREILKEPV-H-G-
 |        |       |  | |   | |   |  ||  |               | | 
KRYICSFADCGAAYNKNWKLQAHLSKHTGEKPFPCKEEGCEKGFTSLHHLTRHSLTHTGE
V-Y-YDPSK-DL-I---AEIQKQ-GQ--G----QW--TY-Q---IYQEPFK---NL-K-T
     |    ||     |   |                       |    |    | | |
KNFTCDSDGCDLRFTTKANMKKHFNRFHNIKMKRYICSFADCGAAYNKNWKLQAHLSKHT
G-K-Y-ARMRGAH---T--NDV-K-QLTEAVQK-ITTES--IVI-W-GK-T-PK-F-KL-
| |       |     |         ||    |  |  |         |    | |    
GEKPFPCKEEGCEKGFTSLHHLTRHSLTHTGEKNFTCDSDGCDLRFTTKANMKKHFNRFH
PIQ-KE---TW-E--TWWTEYW--QA-----TW---IP---E-WE--FVNTPPLVK--LW
 |  |                |  ||     |     |   |  |  |     |    | 
NIKMKRYICSFADCGAAYNKNWKLQAHLSKHTGEKPFPCKEEGCEKGFTSLHHLTRHSLT
Y--Q--L--E-D-IQMTQTT-SSL----SA--SLG-DR-V-TIS-C-SA-SQD--ISSYL
           |      ||                 |       |  |          |
HTGEKNFTCDSDGCDLRFTTKANMKKHFNRFHNIKMKRYICSFADCGAAYNKNWKLQAHL
NWYQ-QK--P---EGTVK-LL-IYY-T-SSL-HSGVPSAFSGSGSGTDYSLTI-SNLEPE
      |  |   ||  |        |  || | |    |     | |   |   |    
SKHTGEKPFPCKEEGCEKGFTSLHHLTRHSLTHTGEKN-FTCDSDGCDLRFTTKANMK-K
DFATYYCQQYSKFPWTFG--GGT-KLEIK-RADAAP-T-VSIFPPSSEQLTSGGASV--V
 |              |   |       |  |     |    ||   |    |  |    
HFNRFHNIKMKRYICSFADCGAAYNKNWKLQAHLSKHTGEKPFPCKEEGCEKGFTSLHHL
C-F-L-N----NF-YPKD-INVAWAIDGSAAA--N---GV-L-N---SWTDQDSK-DSTY
    |      ||    |                |            |  |         
TRHSLTHTGEKNFTCDSDGCDLRFTTKANMKKHFNRFHNIKMKRYICSFADCGAAYNKNW
SMSSTLTL-TADE-Y----EAA-NSYTCAATHKT--S-TSPIVKSFNA-NE-CQI--TLK
     |   |         |      |    | |  | |    | |      |    | |
KLQAHLSKHTGEKPFPCKEEGCEKGFT-SLHHLTRHSLTHTGEKNFTCDSDGCDLRFTTK
ES-GPGIVQ-PS-QPFRLTCTFS--G--FSLS--TSG-IGV-TWIRQ-P---SG--KG--
                |  | |   |                |     |    |  ||  
ANMKKHFNRFHNIKMKRYICSFADCGAAYNKNWKLQAHLSKHTGEKPFPCKEEGCEKGFT
-LEWLA--TIWWDDDNRYN-PS--LKSRLTVSKDTSNN-QAFLNM-M-T-V-ETADT-AI
 |  |                |     | |           | |  |       ||  | 
SLHHLTRHSLTHTGEKNFTCDSDGCDLRFTTKANMKKHFNRFHNIKMKRYICSFADCGAA
Y---YCAQSAITSVT-DSAM--DHWG-Q-G-TSV-TVS-SAAT-TPPSVYPL-APG-SAA
|      |      |          |   | ||         | |          |    
YNKNWKLQAHLSKHTGEKPFPCKEEGCEKGFTSLHHLTRHSLTHTGEKNFTCDSDGCDLR
-QTN-SMVT-LG-C--L-VKGY---FPE--PV-TVTWN-SGSLS--SGVHTFPAVLQS-D
  |   |            | |   |          |     ||   |   ||       
FTTKANMKKHFNRFHNIKMKRYICSFADCGAAYNKNWKLQAHLSKHTGEKPFPCKEEGCE
L-YTLSSSVTVPSSTWPSE-TVTCNV-AHPAS-STKVD-KK-------I-
   |     |  | |   |   ||          ||   ||       | 
KGFTSLHHLTRHSLTHTGEKNFTCDSDGCDLRFTTKANMKKHFNRFHNIK
1j5o 1tf3  386 1422 2024  19.07
PISPIETVPVKLKPGMDGPKVKQWPLTEEKIKALVEICTEMEKEGKISKIGPENPYNTPV
                  |             |    |                    | 
------------R-----P----Y--------A----C--------------------P-
FAIKKKDSTKWRKLVDFRELNKRTQDFWEVQLGIPHPAGLKKKKSVTVLDVGDAYFSVPL
              |             |               |               
--------------V-------------E---------------S--------C------
DEDFRKYTAFTIPSINNETPGIRYQYNVLPQGWKGSPAIFQSSMTKILEPFKKQNPDIVI
  | |                 |                           |         
--D-R-----------------R---------------------------F---------
YQYIDDLYVGSDLEIGQHRTKIEELRQHLLRWGLTTPDKKHQKEPPFLWMGYELHPDKWT
          |                   |                             
----------S-------------------R-----------------------------
VQPIVLPEKDSWTVNDIQKLVGKLNWASQIYPGIKVRQLSKLLRGTKALTEVIPLTEEAE
          |    |                                  |   ||    
----------S----D----------------------------------E---LT----
LELAENREILKEPVHGVYYDPSKDLIAEIQKQGQGQWTYQIYQEPFKNLKTGKYARMRGA
      |       |                         |              |    
------R-------H-------------------------I--------------RI---
HTNDVKQLTEAVQKITTESIVIWGKTPKFKLPIQKETWETWWTEYWQATWIPEWEFVNTP
|               |      |                                    
H---------------T------G------------------------------------
PLVKLWYQLEKEPIVGAETFYVDGAANRETKLGKAGYVTNKGRQKVVPLTNTTNQKTELQ
       |  | |      |                                        
-------Q--K-P------F----------------------------------------
AIYLALQDSGLEVNIVTDSQYALGIIQAQPDKSESELVNQIIEQLIKKEKVYLAWVPAHK
                                                            
------------------------------------------------------------
GIGGNEQVDKLVSAGIRKPISPIETVPVKLKPGMDGPKVKQWPLTEEKIKALVEICTEME
      |         |                                     ||  | 
------Q------C--R-------------------------------------IC--M-
KEGKISKIGPENPYNTPVFAIKKKDSTKWRKLVDFRELNKRTQDFWEVQLGIPHPAGLKK
                                   |  |                     
-----------------------------------R--N---------------------
KKSVTVLDVGDAYFSVPLDEDFRKYTAFTIPSINNETPGIRYQYNVLPQGWKGSPAIFQS
                           |   |        |                   
---------------------------F---S--------R-------------------
SMTKILEPFKKQNPDIVIYQYIDDLYVGSDLEIGQHRTKIEELRQHLLRWGLTTPDKKHQ
                            ||               |     |||      
----------------------------SD---------------H-----LTT------
KEPPFLWMGYELHPDKWTVQPIVLPEKDSWTVNDIQKLVGKLNWASQIYPGIKVRQLSKL
            |                                      |        
------------H--------------------------------------I--------
LRGTKALTEVIPLTEEAELELAENREILKEPVHGVYYDPSKDLIAEIQKQGQGQWTYQIY
 |           |                  |                           
-R-----------T------------------H---------------------------
QEPFKNLKTGKYARMRGAHTNDVKQLTEAVQKITTESIVIWGKTPKFKLPIQKETWETWW
        |       |                  |                |       
--------T-------G------------------E----------------K-------
TEYWQATWIPEWEFVNTPPLVKLWYQLEDIQMTQTTSSLSASLGDRVTISCSASQDISSY
         |   |                          |         |         
---------P---F--------------------------A---------C---------
LNWYQQKPEGTVKLLIYYTSSLHSGVPSAFSGSGSGTDYSLTISNLEPEDFATYYCQQYS
                                     |    |            |    
-------------------------------------D----I------------C----
KFPWTFGGGTKLEIKRADAAPTVSIFPPSSEQLTSGGASVVCFLNNFYPKDINVAWAIDG
        |      |                                            
--------G------R--------------------------------------------
SAAANGVLNSWTDQDSKDSTYSMSSTLTLTADEYEAANSYTCAATHKTSTSPIVKSFNAN
                                                      | | | 
------------------------------------------------------K-F-A-
ECQITLKESGPGIVQPSQPFRLTCTFSGFSLSTSGIGVTWIRQPSGKGLEWLATIWWDDD
                                         |  |             | 
-----------------------------------------R--S-------------DE
NRYNPSLKSRLTVSKDTSNNQAFLNMMTVETADTAIYYCAQSAITSVTDSAMDHWGQGTS
 |     | |                                           |      
-R-----K-R-------------------------------------------H------
VTVSSAATTPPSVYPLAPGSAAQTNSMVTLGCLVKGYFPEPVTVTWNSGSLSSGVHTFPA
                            |     |                    |    
----------------------------T-----K-------------------IH----
VLQSDLYTLSSSVTVPSSTWPSETVTCNVAHPASSTKVDKKI
        |                                 
--------L-------------------------------R-
1j5o 1aay   77 1422   85   5.41
PISPIETVPVKLKPGMDGPKVKQWPLTEEKIKALVEICTEMEKEGKISKIGPENPYNTPV
  |           |     |   |        |                      |   
--S-----------GI----V---P---Q----L------------------Q---N--I
FAIKKKDSTKWRKLVDFRELNKRTQDFWEVQLGIPHPAGLKKKKSVTVLDVGDAYFSVPL
       ||     |     |          ||          |    |   |      |
--V----ST-----V-----N----------LG----C-----K----L---D------L
DEDFRKYTAFTIPSINNETPGIRYQYNVLPQGWKGSPAIFQSSMTKILEPFKKQNPDIVI
     |    ||          |   |          |          |     ||    
-----K----TI-AL--R--A-R---N----------A----------E-Y---NP----
YQYIDDLYVGSDLEIGQHRTKIEELRQHLLRWGLTTPDKKHQKEPPFLWMGYELHPDKWT
                    |         |               |             
--------------------K---------R---------------F-------------
VQPIVLPEKDSWTVNDIQKLVGKLNWASQIYPGIKVRQLSKLLRGTKALTEVIPLTEEAE
                          |                    |   ||       
--------------------------A--------------------A---VI-------
LELAENREILKEPVHGVYYDPSKDLIAEIQKQGQGQWTYQIYQEPFKNLKTGKYARMRGA
      |                     |              ||            |  
--M---R---------------------I-R------------EP------------R--
HTNDVKQLTEAVQKITTESIVIWGKTPKFKLPIQKETWETWWTEYWQATWIPEWEFVNTP
 |      | |                   |                   |    |    
-T------T-A-------------------L-------------------I----F----
PLVKLWYQLEKEPIVGAETFYVDGAANRETKLGKAGYVTNKGRQKVVPLTNTTNQKTELQ
                       |      |               |             
----------------S-S----G------KM--------------V-------------
AIYLALQDSGLEVNIVTDSQYALGIIQAQPDKSESELVNQIIEQLIKKEKVYLAWVPAHK
                |      |   |   ||| |  |             ||   |  
----C-----------T------G---A---KSE-E--N---------SR--LA---A-R
GIGGNEQVDKLVSAGIRKPISPIETVPVKLKPGMDGPKVKQWPLTEEKIKALVEICTEME
         |   |  |          |          | |        | |        
---------K-Y-A--R----------V----------V-Q--------K-L--------
KEGKISKIGPENPYNTPVFAIKKKDSTKWRKLVDFRELNKRTQDFWEVQLGIPHPAGLKK
        |                                   |         ||    
--------G-----------------------------------F---------PA----
KKSVTVLDVGDAYFSVPLDEDFRKYTAFTIPSINNETPGIRYQYNVLPQGWKGSPAIFQS
 |           |   |  || |               |  | |       ||      
-K-----------F---L--DF-K---------------I--Q-NMV-----GS-C----
SMTKILEPFKKQNPDIVIYQYIDDLYVGSDLEIGQHRTKIEELRQHLLRWGLTTPDKKHQ
   |    |    |   |            || |            |    | |    ||
DV-K----F----P---I-R----------LE-G------------LV---L-T----HQ
KEPPFLWMGYELHPDKWTVQPIVLPEKDSWTVNDIQKLVGKLNWASQIYPGIKVRQLSKL
    |                       |                |  |           
-Q--F-----------------------S----------------S--Y-----------
LRGTKALTEVIPLTEEAELELAENREILKEPVHGVYYDPSKDLIAEIQKQGQGQWTYQIY
        |  |       ||         |  |        |               | 
--------E--P-------EL------F--P--G--------L---------------I-
QEPFKNLKTGKYARMRGAHTNDVKQLTEAVQKITTESIVIWGKTPKFKLPIQKETWETWW
           | ||                                   | |       
-----------Y-RM-----------------------------------I-K-------
TEYWQATWIPEWEFVNTPPLVKLWYQLEDIQMTQTTSSLSASLGDRVTISCSASQDISSY
                  |                          |          |   
------------------P--------------------------R----------I---
LNWYQQKPEGTVKLLIYYTSSLHSGVPSAFSGSGSGTDYSLTISNLEPEDFATYYCQQYS
           | |||             |                             |
-----------V-LLI-------------F------------V----------------S
KFPWTFGGGTKLEIKRADAAPTVSIFPPSSEQLTSGGASVVCFLNNFYPKDINVAWAIDG
        |     |       |         ||  ||           |          
--------G-----K-------V-V-------LT--GA-----------K----------
SAAANGVLNSWTDQDSKDSTYSMSSTLTLTADEYEAANSYTCAATHKTSTSPIVKSFNAN
      |                       |   |                 |       
------V---------R-------------A---E-----------------I---Y---
ECQITLKESGPGIVQPSQPFRLTCTFSGFSLSTSGIGVTWIRQPSGKGLEWLATIWWDDD
       |                    |                    |          
-------E------------------A-F--------------------E----------
NRYNPSLKSRLTVSKDTSNNQAFLNMMTVETADTAIYYCAQSAITSVTDSAMDHWGQGTS
                        |                  |                
------------------------N------------------I----------------
VTVSSAATTPPSVYPLAPGSAAQTNSMVTLGCLVKGYFPEPVTVTWNSGSLSSGVHTFPA
             |   |              | |                  |   |  
-------------Y---P---------I----L-K------------------G---F--
VLQSDLYTLSSSVTVPSSTWPSETVTCNVAHPASSTKVDKKI
                                        | 
---------------------------------------RK-
1j5o 1cdw  142 1422  179   9.99
PISPIETVPVKLKPGMDGPKVKQWPLTEEKIKALVEICTEMEKEGKISKIGPENPYNTPV
          |      |        |       |  |                      
----------K-R-A--G--------T-------V--C----------------------
FAIKKKDSTKWRKLVDFRELNKRTQDFWEVQLGIPHPAGLKKKKSVTVLDVGDAYFSVPL
                                                            
------------------------------------------------------------
DEDFRKYTAFTIPSINNETPGIRYQYNVLPQGWKGSPAIFQSSMTKILEPFKKQNPDIVI
             |            |             |   |               
-------------S------------N----------C--Q---T---------------
YQYIDDLYVGSDLEIGQHRTKIEELRQHLLRWGLTTPDKKHQKEPPFLWMGYELHPDKWT
          |                        |                       |
----------S------------------------T-----------------------T
VQPIVLPEKDSWTVNDIQKLVGKLNWASQIYPGIKVRQLSKLLRGTKALTEVIPLTEEAE
            |          | |                 |                
------------T----------L-W-----------------R----------------
LELAENREILKEPVHGVYYDPSKDLIAEIQKQGQGQWTYQIYQEPFKNLKTGKYARMRGA
      |              |                      |           |   
------R--------------S----------------------P-----------M---
HTNDVKQLTEAVQKITTESIVIWGKTPKFKLPIQKETWETWWTEYWQATWIPEWEFVNTP
                                                            
------------------------------------------------------------
PLVKLWYQLEKEPIVGAETFYVDGAANRETKLGKAGYVTNKGRQKVVPLTNTTNQKTELQ
                                                            
------------------------------------------------------------
AIYLALQDSGLEVNIVTDSQYALGIIQAQPDKSESELVNQIIEQLIKKEKVYLAWVPAHK
                                                            
------------------------------------------------------------
GIGGNEQVDKLVSAGIRKPISPIETVPVKLKPGMDGPKVKQWPLTEEKIKALVEICTEME
                                | |       |         |  |    
--------------------------------G-D-------P---------V--C----
KEGKISKIGPENPYNTPVFAIKKKDSTKWRKLVDFRELNKRTQDFWEVQLGIPHPAGLKK
                                      |                     
--------------------------------------N---------------------
KKSVTVLDVGDAYFSVPLDEDFRKYTAFTIPSINNETPGIRYQYNVLPQGWKGSPAIFQS
           |                                        |       
-----------A--------------C-------------------------G-------
SMTKILEPFKKQNPDIVIYQYIDDLYVGSDLEIGQHRTKIEELRQHLLRWGLTTPDKKHQ
     |              |    |                                  
-----L--------------Y----Y----------------------------------
KEPPFLWMGYELHPDKWTVQPIVLPEKDSWTVNDIQKLVGKLNWASQIYPGIKVRQLSKL
|          ||                                          |    
K----------LH------------------------------------------Q----
LRGTKALTEVIPLTEEAELELAENREILKEPVHGVYYDPSKDLIAEIQKQGQGQWTYQIY
                                  |                         
----------------------------------V-------------------------
QEPFKNLKTGKYARMRGAHTNDVKQLTEAVQKITTESIVIWGKTPKFKLPIQKETWETWW
     |         |                            |   |           
-----N---------R----------------------------P---L-----------
TEYWQATWIPEWEFVNTPPLVKLWYQLEDIQMTQTTSSLSASLGDRVTISCSASQDISSY
                |              |                            
----------------T--------------M----------------------------
LNWYQQKPEGTVKLLIYYTSSLHSGVPSAFSGSGSGTDYSLTISNLEPEDFATYYCQQYS
                                                            
------------------------------------------------------------
KFPWTFGGGTKLEIKRADAAPTVSIFPPSSEQLTSGGASVVCFLNNFYPKDINVAWAIDG
               |                                            
---------------R--------------------------------------------
SAAANGVLNSWTDQDSKDSTYSMSSTLTLTADEYEAANSYTCAATHKTSTSPIVKSFNAN
                |              |                            
----------------K--------------D----------------------------
ECQITLKESGPGIVQPSQPFRLTCTFSGFSLSTSGIGVTWIRQPSGKGLEWLATIWWDDD
                                    |   | |          |      
------------------------------------G---I-Q----------T------
NRYNPSLKSRLTVSKDTSNNQAFLNMMTVETADTAIYYCAQSAITSVTDSAMDHWGQGTS
 | |     |                                                  
-R-N-----R--------------------------------------------------
VTVSSAATTPPSVYPLAPGSAAQTNSMVTLGCLVKGYFPEPVTVTWNSGSLSSGVHTFPA
                                  |                         
----------------------------------K-------------------------
VLQSDLYTLSSSVTVPSSTWPSETVTCNVAHPASSTKVDKKI
                            |    ||       
----------------------------V----SS-------
1j5o 1gat   56 1422   60   3.94
PISPIETVPVKLKPGMDGPKVKQWPLTEEKIKALVEICTEMEKEGKISKIGPENPYNTPV
                |   ||  |               |                   
----------------D--RVKR-P---------------M-------------------
FAIKKKDSTKWRKLVDFRELNKRTQDFWEVQLGIPHPAGLKKKKSVTVLDVGDAYFSVPL
                    |                                       
--------------------N---------------------------------------
DEDFRKYTAFTIPSINNETPGIRYQYNVLPQGWKGSPAIFQSSMTKILEPFKKQNPDIVI
        ||           |     |    |                           
--------AF-----------I-----V----W---------------------------
YQYIDDLYVGSDLEIGQHRTKIEELRQHLLRWGLTTPDKKHQKEPPFLWMGYELHPDKWT
          |                   |                             
----------S-------------------R-----------------------------
VQPIVLPEKDSWTVNDIQKLVGKLNWASQIYPGIKVRQLSKLLRGTKALTEVIPLTEEAE
               |            |       |      |  |           | 
---------------D------------Q-------R------R--K-------M---A-
LELAENREILKEPVHGVYYDPSKDLIAEIQKQGQGQWTYQIYQEPFKNLKTGKYARMRGA
  | ||                                      |          |||  
--L-EN--------------------------------------P----------RMR--
HTNDVKQLTEAVQKITTESIVIWGKTPKFKLPIQKETWETWWTEYWQATWIPEWEFVNTP
  |               |                                         
--N---------------S-----------------------------------------
PLVKLWYQLEKEPIVGAETFYVDGAANRETKLGKAGYVTNKGRQKVVPLTNTTNQKTELQ
           | |                                         |    
-----------E-I---------------------------------------S-K----
AIYLALQDSGLEVNIVTDSQYALGIIQAQPDKSESELVNQIIEQLIKKEKVYLAWVPAHK
                   |  ||                           |        
-------------------Q--LG---------------------------Y--------
GIGGNEQVDKLVSAGIRKPISPIETVPVKLKPGMDGPKVKQWPLTEEKIKALVEICTEME
                                        ||       |        | 
----------------------------------------QW-------K--------M-
KEGKISKIGPENPYNTPVFAIKKKDSTKWRKLVDFRELNKRTQDFWEVQLGIPHPAGLKK
                                     |   |    |             
-------------------------------------L---T----E-------------
KKSVTVLDVGDAYFSVPLDEDFRKYTAFTIPSINNETPGIRYQYNVLPQGWKGSPAIFQS
           |       |   |                          |         
-----------A-------E---K--------------------------W---------
SMTKILEPFKKQNPDIVIYQYIDDLYVGSDLEIGQHRTKIEELRQHLLRWGLTTPDKKHQ
       ||                                                   
-------PF---------------------------------------------------
KEPPFLWMGYELHPDKWTVQPIVLPEKDSWTVNDIQKLVGKLNWASQIYPGIKVRQLSKL
    |              |     |                  |          |    
----F--------------Q-----E------------------A----------Q----
LRGTKALTEVIPLTEEAELELAENREILKEPVHGVYYDPSKDLIAEIQKQGQGQWTYQIY
                                        | |                 
----------------------------------------K-L-----------------
QEPFKNLKTGKYARMRGAHTNDVKQLTEAVQKITTESIVIWGKTPKFKLPIQKETWETWW
|           | |   |                                         
Q-----------A-M---H-----------------------------------------
TEYWQATWIPEWEFVNTPPLVKLWYQLEDIQMTQTTSSLSASLGDRVTISCSASQDISSY
                                             |              
---------------------------------------------R--------------
LNWYQQKPEGTVKLLIYYTSSLHSGVPSAFSGSGSGTDYSLTISNLEPEDFATYYCQQYS
                                                            
------------------------------------------------------------
KFPWTFGGGTKLEIKRADAAPTVSIFPPSSEQLTSGGASVVCFLNNFYPKDINVAWAIDG
            | |                                ||           
------------E-K--------------------------------YP-----------
SAAANGVLNSWTDQDSKDSTYSMSSTLTLTADEYEAANSYTCAATHKTSTSPIVKSFNAN
                                     | |                    
-------------------------------------N-Y--------------------
ECQITLKESGPGIVQPSQPFRLTCTFSGFSLSTSGIGVTWIRQPSGKGLEWLATIWWDDD
                                              |             
----------------------------------------------K-------------
NRYNPSLKSRLTVSKDTSNNQAFLNMMTVETADTAIYYCAQSAITSVTDSAMDHWGQGTS
  |      |                                                  
--Y------R--------------------------------------------------
VTVSSAATTPPSVYPLAPGSAAQTNSMVTLGCLVKGYFPEPVTVTWNSGSLSSGVHTFPA
                                                            
------------------------------------------------------------
VLQSDLYTLSSSVTVPSSTWPSETVTCNVAHPASSTKVDKKI
                                          
------------------------------------------
1j5o 1hry   69 1422   73   4.85
PISPIETVPVKLKPGMDGPKVKQWPLTEEKIKALVEICTEMEKEGKISKIGPENPYNTPV
   ||    |         |     |       |                |         
---PI----V---------K-R---L-------L----------------G---------
FAIKKKDSTKWRKLVDFRELNKRTQDFWEVQLGIPHPAGLKKKKSVTVLDVGDAYFSVPL
                           |                                
---------------------------W--------------------------------
DEDFRKYTAFTIPSINNETPGIRYQYNVLPQGWKGSPAIFQSSMTKILEPFKKQNPDIVI
     |                           ||             |    ||     
-----K---------------------------KG-------------E----QN-----
YQYIDDLYVGSDLEIGQHRTKIEELRQHLLRWGLTTPDKKHQKEPPFLWMGYELHPDKWT
               ||     ||                  |     |   |    |  
---------------GQ-----EE------------------K-----WC--E----K--
VQPIVLPEKDSWTVNDIQKLVGKLNWASQIYPGIKVRQLSKLLRGTKALTEVIPLTEEAE
    |   | |        || |           |   | |     |        |    
A---V---K-S--------LV-K-----------K---L-K-----K--------T----
LELAENREILKEPVHGVYYDPSKDLIAEIQKQGQGQWTYQIYQEPFKNLKTGKYARMRGA
                                  |       |     |           
----------------------------------G-------Q-----L-----------
HTNDVKQLTEAVQKITTESIVIWGKTPKFKLPIQKETWETWWTEYWQATWIPEWEFVNTP
   |     |       |                |            |  |       | 
---D-----E----L--E----------------K------------A--I-------T-
PLVKLWYQLEKEPIVGAETFYVDGAANRETKLGKAGYVTNKGRQKVVPLTNTTNQKTELQ
                  |                    |      |   | |  |    
------------------T---------Q----------N------V---N-T--K----
AIYLALQDSGLEVNIVTDSQYALGIIQAQPDKSESELVNQIIEQLIKKEKVYLAWVPAHK
              | |        |   |    |                 |       
----C---------I-T--------I---P-R--S-----------------L-------
GIGGNEQVDKLVSAGIRKPISPIETVPVKLKPGMDGPKVKQWPLTEEKIKALVEICTEME
        |     | |            |          |           |       
--------D-----G-R------------L----------Q-----------V-------
KEGKISKIGPENPYNTPVFAIKKKDSTKWRKLVDFRELNKRTQDFWEVQLGIPHPAGLKK
     |                             |   |          | ||      
-----S-------H---------------------R---K----------GLPH------
KKSVTVLDVGDAYFSVPLDEDFRKYTAFTIPSINNETPGIRYQYNVLPQGWKGSPAIFQS
        |               |               |     |   |         
--------V------I--------Y-C-------------R-----L---W---------
SMTKILEPFKKQNPDIVIYQYIDDLYVGSDLEIGQHRTKIEELRQHLLRWGLTTPDKKHQ
                                                ||    ||    
------------------------------------------------RW----PD----
KEPPFLWMGYELHPDKWTVQPIVLPEKDSWTVNDIQKLVGKLNWASQIYPGIKVRQLSKL
           ||                                            |  
-----------LH--------------------------------------------S--
LRGTKALTEVIPLTEEAELELAENREILKEPVHGVYYDPSKDLIAEIQKQGQGQWTYQIY
                                |                           
--------------------------------H---------------------------
QEPFKNLKTGKYARMRGAHTNDVKQLTEAVQKITTESIVIWGKTPKFKLPIQKETWETWW
                  |                                         
------------------H-----------------------------------------
TEYWQATWIPEWEFVNTPPLVKLWYQLEDIQMTQTTSSLSASLGDRVTISCSASQDISSY
                           |              |  |      |       
---------------------------E--------------L--R------A-------
LNWYQQKPEGTVKLLIYYTSSLHSGVPSAFSGSGSGTDYSLTISNLEPEDFATYYCQQYS
        |                                    |         |    
M-------E------------------------------------L---------C----
KFPWTFGGGTKLEIKRADAAPTVSIFPPSSEQLTSGGASVVCFLNNFYPKDINVAWAIDG
            |            |           |        |             
------------E------------F-----------A--------F-------------
SAAANGVLNSWTDQDSKDSTYSMSSTLTLTADEYEAANSYTCAATHKTSTSPIVKSFNAN
        |             |                       |       |     
--------N-------------M-----------------------K-------K-----
ECQITLKESGPGIVQPSQPFRLTCTFSGFSLSTSGIGVTWIRQPSGKGLEWLATIWWDDD
       |     |         |             |                      
D------E-----V---------C-------------V----------------------
NRYNPSLKSRLTVSKDTSNNQAFLNMMTVETADTAIYYCAQSAITSVTDSAMDHWGQGTS
   ||                                |               |      
---NP--------------------------------Y---------------H------
VTVSSAATTPPSVYPLAPGSAAQTNSMVTLGCLVKGYFPEPVTVTWNSGSLSSGVHTFPA
             |        |                                     
-------------Y--------Q-----------R-------------------------
VLQSDLYTLSSSVTVPSSTWPSETVTCNVAHPASSTKVDKKI
              |       |            |      
--------------V-------E------------T------
1j5o 1mhd  109 1422  123   7.67
PISPIETVPVKLKPGMDGPKVKQWPLTEEKIKALVEICTEMEKEGKISKIGPENPYNTPV
                                                |           
------------------------------------------------K-----------
FAIKKKDSTKWRKLVDFRELNKRTQDFWEVQLGIPHPAGLKKKKSVTVLDVGDAYFSVPL
  |                   |                                    |
--I-------------------R------------------------------------L
DEDFRKYTAFTIPSINNETPGIRYQYNVLPQGWKGSPAIFQSSMTKILEPFKKQNPDIVI
                         |    |        |       |            
-------------------------Y----Q--------F-------L------------
YQYIDDLYVGSDLEIGQHRTKIEELRQHLLRWGLTTPDKKHQKEPPFLWMGYELHPDKWT
      |    ||           ||      |    |           |          
------L----DL-----------LRS-----G----D-----------M----------
VQPIVLPEKDSWTVNDIQKLVGKLNWASQIYPGIKVRQLSKLLRGTKALTEVIPLTEEAE
        |||     |        |                                  
--------KDS-----I--------W----------------------------------
LELAENREILKEPVHGVYYDPSKDLIAEIQKQGQGQWTYQIYQEPFKNLKTGKYARMRGA
                                    |                       
------------------------------------W---V-------------------
HTNDVKQLTEAVQKITTESIVIWGKTPKFKLPIQKETWETWWTEYWQATWIPEWEFVNTP
   | |       |         |                        |      |    
---D-K---D---K---------G------------------------T------F----
PLVKLWYQLEKEPIVGAETFYVDGAANRETKLGKAGYVTNKGRQKVVPLTNTTNQKTELQ
       |           |                                        
-------Q-----------F----------------------------------------
AIYLALQDSGLEVNIVTDSQYALGIIQAQPDKSESELVNQIIEQLIKKEKVYLAWVPAHK
                                                            
------------------------------------------------------------
GIGGNEQVDKLVSAGIRKPISPIETVPVKLKPGMDGPKVKQWPLTEEKIKALVEICTEME
                                                            
------------------------------------------------------------
KEGKISKIGPENPYNTPVFAIKKKDSTKWRKLVDFRELNKRTQDFWEVQLGIPHPAGLKK
     |                   |             |             |      
-----S-------------------S-------------K-------------H------
KKSVTVLDVGDAYFSVPLDEDFRKYTAFTIPSINNETPGIRYQYNVLPQGWKGSPAIFQS
 |                 |      |                   |        |    
-K-----------------E------A-------------------L--------A----
SMTKILEPFKKQNPDIVIYQYIDDLYVGSDLEIGQHRTKIEELRQHLLRWGLTTPDKKHQ
                                             |  |           
---------------------------------------------H--R-----------
KEPPFLWMGYELHPDKWTVQPIVLPEKDSWTVNDIQKLVGKLNWASQIYPGIKVRQLSKL
                                           |      ||   |  | 
-------------------------------------------W------GI---Q--K-
LRGTKALTEVIPLTEEAELELAENREILKEPVHGVYYDPSKDLIAEIQKQGQGQWTYQIY
  |                    ||                                   
--G--------------------NR-----------------------------------
QEPFKNLKTGKYARMRGAHTNDVKQLTEAVQKITTESIVIWGKTPKFKLPIQKETWETWW
       |  |   |                                             
-------K--K---M---------------------------------------------
TEYWQATWIPEWEFVNTPPLVKLWYQLEDIQMTQTTSSLSASLGDRVTISCSASQDISSY
| |         |        |         |        |    |      |       
T-Y---------E--------K---------M--------A----R------A-------
LNWYQQKPEGTVKLLIYYTSSLHSGVPSAFSGSGSGTDYSLTISNLEPEDFATYYCQQYS
|                                           |             | 
L-----------R-------------------------------N-------------Y-
KFPWTFGGGTKLEIKRADAAPTVSIFPPSSEQLTSGGASVVCFLNNFYPKDINVAWAIDG
        |     |                  |                          
--------G-----K------------------T--------------------------
SAAANGVLNSWTDQDSKDSTYSMSSTLTLTADEYEAANSYTCAATHKTSTSPIVKSFNAN
     |                            |                  ||     
-----G----------------------------E------------------VK-----
ECQITLKESGPGIVQPSQPFRLTCTFSGFSLSTSGIGVTWIRQPSGKGLEWLATIWWDDD
      |                              |        |             
------K------------------------------V--------K-------------
NRYNPSLKSRLTVSKDTSNNQAFLNMMTVETADTAIYYCAQSAITSVTDSAMDHWGQGTS
       |      |        |                                    
-------K------K--------L------------------------------------
VTVSSAATTPPSVYPLAPGSAAQTNSMVTLGCLVKGYFPEPVTVTWNSGSLSSGVHTFPA
        |    |        |              |              ||      
--------T----Y--------Q--------------F--------------SG------
VLQSDLYTLSSSVTVPSSTWPSETVTCNVAHPASSTKVDKKI
                      |              |    
----------------------E--------------V---L
1j5o 1pue   84 1422   89   5.91
PISPIETVPVKLKPGMDGPKVKQWPLTEEKIKALVEICTEMEKEGKISKIGPENPYNTPV
                                                            
------------------------------------------------------------
FAIKKKDSTKWRKLVDFRELNKRTQDFWEVQLGIPHPAGLKKKKSVTVLDVGDAYFSVPL
       |                            |                 | |   
-------S----------------------------P-----------------Y-S---
DEDFRKYTAFTIPSINNETPGIRYQYNVLPQGWKGSPAIFQSSMTKILEPFKKQNPDIVI
        |                            |     |                
--------A----------------------------A-----M----------------
YQYIDDLYVGSDLEIGQHRTKIEELRQHLLRWGLTTPDKKHQKEPPFLWMGYELHPDKWT
                      ||      |         ||          |     | 
----------A-----------EE------R---------HQ----------E-----W-
VQPIVLPEKDSWTVNDIQKLVGKLNWASQIYPGIKVRQLSKLLRGTKALTEVIPLTEEAE
     |       | |   |  | | |   |      |                      
-----L--R--F-V-DL--L--K-N-A---Y------Q----------------------
LELAENREILKEPVHGVYYDPSKDLIAEIQKQGQGQWTYQIYQEPFKNLKTGKYARMRGA
     |   |    |     |   |                      ||       |   
-----N-D-L----H-L---P---L---------------L------NL-------M---
HTNDVKQLTEAVQKITTESIVIWGKTPKFKLPIQKETWETWWTEYWQATWIPEWEFVNTP
       |                 |     |      |    |   |            
-------L-----------------T-----P---D--E---RE---A------------
PLVKLWYQLEKEPIVGAETFYVDGAANRETKLGKAGYVTNKGRQKVVPLTNTTNQKTELQ
        |      |  |        |         |    |   |          |  
--------L------G--T--------R---------V----R--IV----------E-E
AIYLALQDSGLEVNIVTDSQYALGIIQAQPDKSESELVNQIIEQLIKKEKVYLAWVPAHK
   | |   | |                      |        |    |   |      |
---L-LR--G-E----------M-----------S--------Q---RE---L------K
GIGGNEQVDKLVSAGIRKPISPIETVPVKLKPGMDGPKVKQWPLTEEKIKALVEICTEME
    ||    |   |                    |            | |   | |   
----NE----L---G-----A--------------G------------I-A-T-I-T---
KEGKISKIGPENPYNTPVFAIKKKDSTKWRKLVDFRELNKRTQDFWEVQLGIPHPAGLKK
  |  |        |          |                               |  
R-G--S--------N----------S-------------------------------L--
KKSVTVLDVGDAYFSVPLDEDFRKYTAFTIPSINNETPGIRYQYNVLPQGWKGSPAIFQS
 |         |              |   |    |    |       | |         
-K---------A--------------A---P-V--E---LR-------Q-W---------
SMTKILEPFKKQNPDIVIYQYIDDLYVGSDLEIGQHRTKIEELRQHLLRWGLTTPDKKHQ
     ||         |       |   ||          ||      |         ||
-----LE-------E-V----L--L--KSD---AM--A--EE------R---------HQ
KEPPFLWMGYELHPDKWTVQPIVLPEKDSWTVNDIQKLVGKLNWASQIYPGIKVRQLSKL
          |     |      |       | |   |  | | |   |      |    
----------E-----W------L--R--F-V-DL--L--K-N-A---Y------Q----
LRGTKALTEVIPLTEEAELELAENREILKEPVHGVYYDPSKDLIAEIQKQGQGQWTYQIY
                       |   |    |     |   |                 
-----------------------N-D-L----H-L---P---L---------------L-
QEPFKNLKTGKYARMRGAHTNDVKQLTEAVQKITTESIVIWGKTPKFKLPIQKETWETWW
     ||       |                                 |           
-----NL-------M---------------------------------L-----------
TEYWQATWIPEWEFVNTPPLVKLWYQLEDIQMTQTTSSLSASLGDRVTISCSASQDISSY
      |  |  |              |            | ||   |            
------T--PD-E--------R-----E------------A-LG---T------------
LNWYQQKPEGTVKLLIYYTSSLHSGVPSAFSGSGSGTDYSLTISNLEPEDFATYYCQQYS
           |   |         |                    | |           
------R----VR--I---------V--------------------E-E-----------
KFPWTFGGGTKLEIKRADAAPTVSIFPPSSEQLTSGGASVVCFLNNFYPKDINVAWAIDG
           |   |                    |                       
-----------L-L-R--------------------G---------------------E-
SAAANGVLNSWTDQDSKDSTYSMSSTLTLTADEYEAANSYTCAATHKTSTSPIVKSFNAN
         |   |                    |                   |    |
-------M-S---Q--R-----------------E-----------------L-K----N
ECQITLKESGPGIVQPSQPFRLTCTFSGFSLSTSGIGVTWIRQPSGKGLEWLATIWWDDD
|    |     |               |    |  |  |  |     |            
E----L-----G--------------AG--IAT--I--T--R-----G------------
NRYNPSLKSRLTVSKDTSNNQAFLNMMTVETADTAIYYCAQSAITSVTDSAMDHWGQGTS
   |    | |   |                                             
S--N----S-L---K---------------------------------------------
VTVSSAATTPPSVYPLAPGSAAQTNSMVTLGCLVKGYFPEPVTVTWNSGSLSSGVHTFPA
     ||   | |                   |            |    |         
-----AA---P-V---------E---------L-R----Q-----W----L-E--E----
VLQSDLYTLSSSVTVPSSTWPSETVTCNVAHPASSTKVDKKI
|    |  |                         |   |   
V----L--L-------------K-----------S---D---
1j5o 1tro  153 1422  203  10.76
PISPIETVPVKLKPGMDGPKVKQWPLTEEKIKALVEICTEMEKEGKISKIGPENPYNTPV
                                                            
------------------------------------------------------------
FAIKKKDSTKWRKLVDFRELNKRTQDFWEVQLGIPHPAGLKKKKSVTVLDVGDAYFSVPL
                                                            
------------------------------------------------------------
DEDFRKYTAFTIPSINNETPGIRYQYNVLPQGWKGSPAIFQSSMTKILEPFKKQNPDIVI
                                                            
------------------------------------------------------------
YQYIDDLYVGSDLEIGQHRTKIEELRQHLLRWGLTTPDKKHQKEPPFLWMGYELHPDKWT
                                                 |          
-------------------------------------------------M----------
VQPIVLPEKDSWTVNDIQKLVGKLNWASQIYPGIKVRQLSKLLRGTKALTEVIPLTEEAE
                                                   |        
---------------------------------------------------V--------
LELAENREILKEPVHGVYYDPSKDLIAEIQKQGQGQWTYQIYQEPFKNLKTGKYARMRGA
          |     |             |              |      ||      
----------K-----V-------------K--------------F------KY------
HTNDVKQLTEAVQKITTESIVIWGKTPKFKLPIQKETWETWWTEYWQATWIPEWEFVNTP
             |         |                              |     
-------------K---------G------------------------------E-----
PLVKLWYQLEKEPIVGAETFYVDGAANRETKLGKAGYVTNKGRQKVVPLTNTTNQKTELQ
         ||                 |                 |             
---------EK-----------------E-----------------V-------------
AIYLALQDSGLEVNIVTDSQYALGIIQAQPDKSESELVNQIIEQLIKKEKVYLAWVPAHK
       |        | |            |             | | ||   |     
-------D--------T-S------------K-------------I-K-KV---W-----
GIGGNEQVDKLVSAGIRKPISPIETVPVKLKPGMDGPKVKQWPLTEEKIKALVEICTEME
                |          |       |             |        | 
----------------R----------V-------G-------------K--------M-
KEGKISKIGPENPYNTPVFAIKKKDSTKWRKLVDFRELNKRTQDFWEVQLGIPHPAGLKK
                 |       |                  |               
-----------------V-------S------------------F---------------
KKSVTVLDVGDAYFSVPLDEDFRKYTAFTIPSINNETPGIRYQYNVLPQGWKGSPAIFQS
    |       |     | |                                       
----T-------Y-----D-D---------------------------------------
SMTKILEPFKKQNPDIVIYQYIDDLYVGSDLEIGQHRTKIEELRQHLLRWGLTTPDKKHQ
            |                                               
------------N-----------------------------------------------
KEPPFLWMGYELHPDKWTVQPIVLPEKDSWTVNDIQKLVGKLNWASQIYPGIKVRQLSKL
        |                 |   |                   |         
--------G-----------------K---T-------------------G---------
LRGTKALTEVIPLTEEAELELAENREILKEPVHGVYYDPSKDLIAEIQKQGQGQWTYQIY
 ||                  |            |    |                    
-RG------------------A------------V----S--------------------
QEPFKNLKTGKYARMRGAHTNDVKQLTEAVQKITTESIVIWGKTPKFKLPIQKETWETWW
 |        |          |      |                    |  |       
-E--------K----------D------A--------------------P--K-------
TEYWQATWIPEWEFVNTPPLVKLWYQLEDIQMTQTTSSLSASLGDRVTISCSASQDISSY
            |         |   | |  |                            
------------E---------L---L-D--M----------------------------
LNWYQQKPEGTVKLLIYYTSSLHSGVPSAFSGSGSGTDYSLTISNLEPEDFATYYCQQYS
                                             |     |        
---------------------------------------------L-----A--------
KFPWTFGGGTKLEIKRADAAPTVSIFPPSSEQLTSGGASVVCFLNNFYPKDINVAWAIDG
               |                                            
---------------R--------------------------------------------
SAAANGVLNSWTDQDSKDSTYSMSSTLTLTADEYEAANSYTCAATHKTSTSPIVKSFNAN
                                                          | 
----------------------------------------------------------A-
ECQITLKESGPGIVQPSQPFRLTCTFSGFSLSTSGIGVTWIRQPSGKGLEWLATIWWDDD
                                                 |          
-------------------------------------------------E----------
NRYNPSLKSRLTVSKDTSNNQAFLNMMTVETADTAIYYCAQSAITSVTDSAMDHWGQGTS
         |                                                  
---------R--------------------------------------------------
VTVSSAATTPPSVYPLAPGSAAQTNSMVTLGCLVKGYFPEPVTVTWNSGSLSSGVHTFPA
                                                            
------------------------------------------------------------
VLQSDLYTLSSSVTVPSSTWPSETVTCNVAHPASSTKVDKKI
                      |                || 
----------------------E----------------KK-
1j5o 1azq   66 1422   66   4.64
PISPIETVPVKLKPGMDGPKVKQWPLTEEKIKALVEICTEMEKEGKISKIGPENPYNTPV
                                                            
------------------------------------------------------------
FAIKKKDSTKWRKLVDFRELNKRTQDFWEVQLGIPHPAGLKKKKSVTVLDVGDAYFSVPL
       |              |            |                        
-------S--------------R------------H------------------------
DEDFRKYTAFTIPSINNETPGIRYQYNVLPQGWKGSPAIFQSSMTKILEPFKKQNPDIVI
                                                |   |       
------------------------------------------------E---K-------
YQYIDDLYVGSDLEIGQHRTKIEELRQHLLRWGLTTPDKKHQKEPPFLWMGYELHPDKWT
          | |  |             |   |||      |   |             
----------S-L--G-------------L---LTT------K---F-------------
VQPIVLPEKDSWTVNDIQKLVGKLNWASQIYPGIKVRQLSKLLRGTKALTEVIPLTEEAE
    |     |        |   |             |                      
----V-----S--------L---L-------------Q----------------------
LELAENREILKEPVHGVYYDPSKDLIAEIQKQGQGQWTYQIYQEPFKNLKTGKYARMRGA
 | |                  ||          |             |           
-E-A------------------KD----------G-----V-------L-----------
HTNDVKQLTEAVQKITTESIVIWGKTPKFKLPIQKETWETWWTEYWQATWIPEWEFVNTP
   |   |                     ||                |            
---D---L---------------------KL----------------A------------
PLVKLWYQLEKEPIVGAETFYVDGAANRETKLGKAGYVTNKGRQKVVPLTNTTNQKTELQ
                |     |      | |  |  |    |||               
----------------A-----D------T-L--A--V----RQK----------R---R
AIYLALQDSGLEVNIVTDSQYALGIIQAQPDKSESELVNQIIEQLIKKEKVYLAWVPAHK
 ||    |      | |                     |           | |       
-IY----D------I-T---------------------N-----------V-L-------
GIGGNEQVDKLVSAGIRKPISPIETVPVKLKPGMDGPKVKQWPLTEEKIKALVEICTEME
     |        |       |            |               |  |    |
-----E--------G-------I------------G---------------L--I----E
KEGKISKIGPENPYNTPVFAIKKKDSTKWRKLVDFRELNKRTQDFWEVQLGIPHPAGLKK
|  | ||       |          |                |  |              
K--K-SK-------N----------S------I---------Q--W--------------
KKSVTVLDVGDAYFSVPLDEDFRKYTAFTIPSINNETPGIRYQYNVLPQGWKGSPAIFQS
 |       |             |              | |                |  
-K-------G-------------K--------------GLR--H-------------F--
SMTKILEPFKKQNPDIVIYQYIDDLYVGSDLEIGQHRTKIEELRQHLLRWGLTTPDKKHQ
|| |  |   |               |       | | |           | ||      
SM-KVCE---K---------------V-------Q-R-K-----------G-TT------
KEPPFLWMGYELHPDKWTVQPIVLPEKDSWTVNDIQKLVGKLNWASQIYPGIKVRQLSKL
         |                                |                 
--------SY--------------------------------N-----------------
LRGTKALTEVIPLTEEAELELAENREILKEPVHGVYYDPSKDLIAEIQKQGQGQWTYQIY
        ||           |   | |      |    |                    
--------EV-----------AD--E-L------V----S--------------------
QEPFKNLKTGKYARMRGAHTNDVKQLTEAVQKITTESIVIWGKTPKFKLPIQKETWETWW
 | |               ||               |                       
-E-F---------------TN---------------S-----------------------
TEYWQATWIPEWEFVNTPPLVKLWYQLEDIQMTQTTSSLSASLGDRVTISCSASQDISSY
               |                                            
---------------N--------------------------------------------
LNWYQQKPEGTVKLLIYYTSSLHSGVPSAFSGSGSGTDYSLTISNLEPEDFATYYCQQYS
 |                    |     |        |     |       |  |  |  
-N--------------------H--L--A-----A--D-----S-------A--Y-DQ--
KFPWTFGGGTKLEIKRADAAPTVSIFPPSSEQLTSGGASVVCFLNNFYPKDINVAWAIDG
          |  | |                        |      |  |     |   
----------K-NIRR---------------R--------V------Y--D-----AL--
SAAANGVLNSWTDQDSKDSTYSMSSTLTLTADEYEAANSYTCAATHKTSTSPIVKSFNAN
    | ||              |                    |               |
----N-VL--------------M--------------------A---------M-----N
ECQITLKESGPGIVQPSQPFRLTCTFSGFSLSTSGIGVTWIRQPSGKGLEWLATIWWDDD
                                   |    |   | |  |          
-----------------------------------I----I---S-K--E----------
NRYNPSLKSRLTVSKDTSNNQAFLNMMTVETADTAIYYCAQSAITSVTDSAMDHWGQGTS
       |      |              |             |                
-------K------K--------------E-------------I----------------
VTVSSAATTPPSVYPLAPGSAAQTNSMVTLGCLVKGYFPEPVTVTWNSGSLSSGVHTFPA
                                  |          |       |      
----------------------------------K----------W----I--G------
VLQSDLYTLSSSVTVPSSTWPSETVTCNVAHPASSTKVDKKI
        |                      |          
--------L----------------------P----------
1j5o 1cf7  130 1422  149   9.14
PISPIETVPVKLKPGMDGPKVKQWPLTEEKIKALVEICTEMEKEGKISKIGPENPYNTPV
                                                            
------------------------------------------------------------
FAIKKKDSTKWRKLVDFRELNKRTQDFWEVQLGIPHPAGLKKKKSVTVLDVGDAYFSVPL
                                                            
------------------------------------------------------------
DEDFRKYTAFTIPSINNETPGIRYQYNVLPQGWKGSPAIFQSSMTKILEPFKKQNPDIVI
                                                            
------------------------------------------------------------
YQYIDDLYVGSDLEIGQHRTKIEELRQHLLRWGLTTPDKKHQKEPPFLWMGYELHPDKWT
                                                            
------------------------------------------------------------
VQPIVLPEKDSWTVNDIQKLVGKLNWASQIYPGIKVRQLSKLLRGTKALTEVIPLTEEAE
                                     |     |                
-------------------------------------Q-----R----------------
LELAENREILKEPVHGVYYDPSKDLIAEIQKQGQGQWTYQIYQEPFKNLKTGKYARMRGA
      |              |                                   |  
------R--------------S-----------------------------------R--
HTNDVKQLTEAVQKITTESIVIWGKTPKFKLPIQKETWETWWTEYWQATWIPEWEFVNTP
                                                          | 
----------------------------------------------------------T-
PLVKLWYQLEKEPIVGAETFYVDGAANRETKLGKAGYVTNKGRQKVVPLTNTTNQKTELQ
                  ||                                        
------------------TF----------------------------------------
AIYLALQDSGLEVNIVTDSQYALGIIQAQPDKSESELVNQIIEQLIKKEKVYLAWVPAHK
                                                            
------------------------------------------------------------
GIGGNEQVDKLVSAGIRKPISPIETVPVKLKPGMDGPKVKQWPLTEEKIKALVEICTEME
            ||      |                   |                   
------------SA------S-------------------Q-------------------
KEGKISKIGPENPYNTPVFAIKKKDSTKWRKLVDFRELNKRTQDFWEVQLGIPHPAGLKK
                                     |     |  |             
-------------------------------------L-----D--E-------------
KKSVTVLDVGDAYFSVPLDEDFRKYTAFTIPSINNETPGIRYQYNVLPQGWKGSPAIFQS
                 |                 |    |              |    
-----------------L-----------------E----R--------------A----
SMTKILEPFKKQNPDIVIYQYIDDLYVGSDLEIGQHRTKIEELRQHLLRWGLTTPDKKHQ
        |                                |      |    |     |
--------F--------------------------------E------R----T-----Q
KEPPFLWMGYELHPDKWTVQPIVLPEKDSWTVNDIQKLVGKLNWASQIYPGIKVRQLSKL
         |              |        |             ||           
---------Y--------------P--------D-------------IY-----------
LRGTKALTEVIPLTEEAELELAENREILKEPVHGVYYDPSKDLIAEIQKQGQGQWTYQIY
             |          ||   |            | |               
-------------T----------RE---E------------L-A---------------
QEPFKNLKTGKYARMRGAHTNDVKQLTEAVQKITTESIVIWGKTPKFKLPIQKETWETWW
|              |   ||                           |           
Q--------------R---TN---------------------------L-----------
TEYWQATWIPEWEFVNTPPLVKLWYQLEDIQMTQTTSSLSASLGDRVTISCSASQDISSY
                |          |            |    |          |   
----------------T----------E------------A----R----------I---
LNWYQQKPEGTVKLLIYYTSSLHSGVPSAFSGSGSGTDYSLTISNLEPEDFATYYCQQYS
     |                   |                                  
-----Q-------------------V----------------------------------
KFPWTFGGGTKLEIKRADAAPTVSIFPPSSEQLTSGGASVVCFLNNFYPKDINVAWAIDG
   |                                          |             
---W------------------------------------------F-------------
SAAANGVLNSWTDQDSKDSTYSMSSTLTLTADEYEAANSYTCAATHKTSTSPIVKSFNAN
             |                                             |
-------------Q---------------------------------------------N
ECQITLKESGPGIVQPSQPFRLTCTFSGFSLSTSGIGVTWIRQPSGKGLEWLATIWWDDD
                    |                    |          |       
--------------------R--------------------R----------A-------
NRYNPSLKSRLTVSKDTSNNQAFLNMMTVETADTAIYYCAQSAITSVTDSAMDHWGQGTS
 |    |  |    |                                             
-R----L--R----K---------------------------------------------
VTVSSAATTPPSVYPLAPGSAAQTNSMVTLGCLVKGYFPEPVTVTWNSGSLSSGVHTFPA
                      |                                |    
----------------------Q--------------------------------H----
VLQSDLYTLSSSVTVPSSTWPSETVTCNVAHPASSTKVDKKI
                  |  |      |     |       
------------------T--S------V-----S-------
1j5o 1fjl   64 1422   64   4.50
PISPIETVPVKLKPGMDGPKVKQWPLTEEKIKALVEICTEMEKEGKISKIGPENPYNTPV
 | |               |         | |     |       |        |     
RI-PL-SCTI-CR------K-R-------KVK-----C-----D-KL-R-----PH----
FAIKKKDSTKWRKLVDFRELNKRTQDFWEVQLGIPHPAGLKKKKSVTVLDVGDAYFSVPL
        |            | |        |  |            |           
-C--QQ-CT------------K-T--------GVAH------------L----CH-----
DEDFRKYTAFTIPSINNETPGIRYQYNVLPQGWKGSPAIFQSSMTKILEPFKKQNPDIVI
      |          |      |       |    |          |   |       
------Y-------M--E------Q--T----W----A--EEA-----E---K---EL-L
YQYIDDLYVGSDLEIGQHRTKIEELRQHLLRWGLTTPDKKHQKEPPFLWMGYELHPDKWT
     |       |      |   ||    |           |    |    |    | |
-K---D-----N-EL---K-K---LRE---R--V--------KS---L----E----K-T
VQPIVLPEKDSWTVNDIQKLVGKLNWASQIYPGIKVRQLSKLLRGTKALTEVIPLTEEAE
     |  |     |        |   |     |  |   |  |  |    |        
-----L-RK---R-N---R-I-PL---S-C-T-I-CR---K--R--K----V-----KCD
LELAENREILKEPVHGVYYDPSKDLIAEIQKQGQGQWTYQIYQEPFKNLKTGKYARMRGA
  |   |     | |                  | | |           |||       |
-KL---R-----P-H-----------C------Q-QCT-----------KTG----V--A
HTNDVKQLTEAVQKITTESIVIWGKTPKFKLPIQKETWETWWTEYWQATWIPEWEFVNTP
|      |                           |      |  | |            
H------L--C------H----------Y-M----E--Q---T--W-A------------
PLVKLWYQLEKEPIVGAETFYVDGAANRETKLGKAGYVTNKGRQKVVPLTNTTNQKTELQ
         | |    ||          |  |                |      |    
---------E-E----AE---------KE--L----------------L------K----
AIYLALQDSGLEVNIVTDSQYALGIIQAQPDKSESELVNQIIEQLIKKEKVYLAWVPAHK
                              |       |   | |  | |  |       
------------------------------D-------N---E-L--K-K--L------R
GIGGNEQVDKLVSAGIRKPISPIETVPVKLKPGMDGPKVKQWPLTEEKIKALVEICTEME
     | | |  |    |      |    |            ||           ||   
-----ERV-K--S--LEK------T----L-------RI---PL------S----CT---
KEGKISKIGPENPYNTPVFAIKKKDSTKWRKLVDFRELNKRTQDFWEVQLGIPHPAGLKK
       |                   | || |      |   |                
-------I-----------C---R---K-RK-V------K-C-D----------------
KKSVTVLDVGDAYFSVPLDEDFRKYTAFTIPSINNETPGIRYQYNVLPQGWKGSPAIFQS
 |               |    |              |          |         | 
-K---------------L----R--------------P-----H--C-Q---------Q-
SMTKILEPFKKQNPDIVIYQYIDDLYVGSDLEIGQHRTKIEELRQHLLRWGLTTPDKKHQ
  |       |                      |           |     |      | 
-CT-------K-----------------T----G-----V----AH-----L-C----H-
KEPPFLWMGYELHPDKWTVQPIVLPEKDSWTVNDIQKLVGKLNWASQIYPGIKVRQLSKL
       |  |        |          |            |                
----Y--M--E--------Q----------T------------W----------------
LRGTKALTEVIPLTEEAELELAENREILKEPVHGVYYDPSKDLIAEIQKQGQGQWTYQIY
                || | ||  | ||        |       |  |           
----------------AE-E-AE-KELLK--------D---N---EL-K-----------
QEPFKNLKTGKYARMRGAHTNDVKQLTEAVQKITTESIVIWGKTPKFKLPIQKETWETWW
    | |      | |      || | |   |  |          |              
----K-L------RER------VKSL-E---K--T----L-----K-R---NR-------
TEYWQATWIPEWEFVNTPPLVKLWYQLEDIQMTQTTSSLSASLGDRVTISCSASQDISSY
        |         |                   ||       || |         
--------I---------P-------------------LSC------TI-C---R-----
LNWYQQKPEGTVKLLIYYTSSLHSGVPSAFSGSGSGTDYSLTISNLEPEDFATYYCQQYS
      |    ||                        |       | |       |||  
----KRK----VK---------------C--------D------KLRP------HCQQCT
KFPWTFGGGTKLEIKRADAAPTVSIFPPSSEQLTSGGASVVCFLNNFYPKDINVAWAIDG
|   |   |          |            |        |     |            
K---T---G----V-----A-----------HL--------C---H-Y------------
SAAANGVLNSWTDQDSKDSTYSMSSTLTLTADEYEAANSYTCAATHKTSTSPIVKSFNAN
             |     |          | | |                       | 
-------M----EQ-----TW---------A-E-E-----------------------A-
ECQITLKESGPGIVQPSQPFRLTCTFSGFSLSTSGIGVTWIRQPSGKGLEWLATIWWDDD
|     ||             |        |               |            |
E-----KE-------------L--------L---------------K------------D
NRYNPSLKSRLTVSKDTSNNQAFLNMMTVETADTAIYYCAQSAITSVTDSAMDHWGQGTS
   |  ||      |        |     |                              
---N-ELK------K--------LR----E------------------------------
VTVSSAATTPPSVYPLAPGSAAQTNSMVTLGCLVKGYFPEPVTVTWNSGSLSSGVHTFPA
                                 ||                         
----------------------R----------VK-------------------------
VLQSDLYTLSSSVTVPSSTWPSETVTCNVAHPASSTKVDKKI
   |    |             |             |     
---S----L-------------E-------------KT---L
1j5o 1hwt  180 1422  287  12.66
PISPIETVPVKLKPGMDGPKVKQWPLTEEKIKALVEICTEMEKEGKISKIGPENPYNTPV
                     |     |   |   ||        |   |  |   |   
-----Q---------------K-----ERR-K--IEI--------KF--I--E---N---
FAIKKKDSTKWRKLVDFRELNKRTQDFWEVQLGIPHPAGLKKKKSVTVLDVGDAYFSVPL
     |  |  |  | |    ||            |  |   ||         | |    
-----K--TR-RH-VTF---SKR-------K----H--GI-MKK---------A-F----
DEDFRKYTAFTIPSINNETPGIRYQYNVLPQGWKGSPAIFQSSMTKILEPFKKQNPDIVI
 |           |    | |   |  ||                  |          | 
-E---------L-SV--LT-G-T-Q--VL------------------L---------LV-
YQYIDDLYVGSDLEIGQHRTKIEELRQHLLRWGLTTPDKKHQKEPPFLWMGYELHPDKWT
         |  |      |               ||     |   |     |       
---VSE--TG--L-V--Y-T-----------F--STP-----K---F-----E-------
VQPIVLPEKDSWTVNDIQKLVGKLNWASQIYPGIKVRQLSKLLRGTKALTEVIPLTEEAE
  |||       |    |   |  |        |   |    |    |     |      
--PIV-------T--Q-QE--GR-N----L---I---Q-A-CL---NA-----P------
LELAENREILKEPVHGVYYDPSKDLIAEIQKQGQGQWTYQIYQEPFKNLKTGKYARMRGA
      |               |  | || |         |  |   | ||    | |  
-D--D-R---R-----------K--I-EI-K-------F-I--E---N-KT----R-R--
HTNDVKQLTEAVQKITTESIVIWGKTPKFKLPIQKETWETWWTEYWQATWIPEWEFVNTP
|   |   |         |        |      |               |         
H---V---T-----F---S--------K-R----K---------H--G--I---------
PLVKLWYQLEKEPIVGAETFYVDGAANRETKLGKAGYVTNKGRQKVVPLTNTTNQKTELQ
   |      |     |  |        |  |              | |   |   |  |
-M-K------K-----A--F--------E--L-------S------V-L---TG--T--Q
AIYLALQDSGLEVNIVTDSQYALGIIQAQPDKSESELVNQIIEQLIKKEKVYLAWVPAHK
   | |    | |  |  |    |            ||                  |  |
-V-L-L----L-V--V--SE-T-G------------LV-------Y----TF-S-TP--K
GIGGNEQVDKLVSAGIRKPISPIETVPVKLKPGMDGPKVKQWPLTEEKIKALVEICTEME
     |            ||    |          |       |    | |    |    
-F---E------------PI--V-T---Q-Q---EG---RN--L----IQA----C----
KEGKISKIGPENPYNTPVFAIKKKDSTKWRKLVDFRELNKRTQDFWEVQLGIPHPAGLKK
              | |       |      || |   |        |            
-------L------NAP-------DG-----LV-F---N--------V------------
KKSVTVLDVGDAYFSVPLDEDFRKYTAFTIPSINNETPGIRYQYNVLPQGWKGSPAIFQS
   ||               |                  |    |      |        
---VT--------------QD-----------M------I----N------K--------
SMTKILEPFKKQNPDIVIYQYIDDLYVGSDLEIGQHRTKIEELRQHLLRWGLTTPDKKHQ
| |       |  |    |              |           |  |    |      
S-T-------K--P----YR-------------G-----------H--RF---T------
KEPPFLWMGYELHPDKWTVQPIVLPEKDSWTVNDIQKLVGKLNWASQIYPGIKVRQLSKL
|         |       |  | | |  ||              |               
K---------E---N---VR-I-L-E--SW-------------FA---------------
LRGTKALTEVIPLTEEAELELAENREILKEPVHGVYYDPSKDLIAEIQKQGQGQWTYQIY
    |                  |  |  |        |                    |
----K------------------N--I--E-------NP--------------------Y
QEPFKNLKTGKYARMRGAHTNDVKQLTEAVQKITTESIVIWGKTPKFKLPIQKETWETWW
      |              |    |    |         |      |           
------L--------------D----T----K---------G------L-----------
TEYWQATWIPEWEFVNTPPLVKLWYQLEDIQMTQTTSSLSASLGDRVTISCSASQDISSY
            |  |   | |             | ||  |   |  |     | |   
------------E--N---LMK------N------T-SL--S---R--I-----Q-I-K-
LNWYQQKPEGTVKLLIYYTSSLHSGVPSAFSGSGSGTDYSLTISNLEPEDFATYYCQQYS
 ||                      |                 ||               
-NW----------------------V-----------------SN-----------RR--
KFPWTFGGGTKLEIKRADAAPTVSIFPPSSEQLTSGGASVVCFLNNFYPKDINVAWAIDG
          | | |                  |  |   |     |     ||      
R---------K-E-K------------------T--G--LV-----F-----NV------
SAAANGVLNSWTDQDSKDSTYSMSSTLTLTADEYEAANSYTCAATHKTSTSPIVKSFNAN
      |    | |   |    |              |        | || |        
------V----T-Q---D----M-----I--------N--------K-STKP----YRGH
ECQITLKESGPGIVQPSQPFRLTCTFSGFSLSTSGIGVTWIRQPSGKGLEWLATIWWDDD
    | ||     |      |         |  |     |      |  |          
--RFT-KEN----V------RI--------LE-S-----WF---A-KNIE----------
NRYNPSLKSRLTVSKDTSNNQAFLNMMTVETADTAIYYCAQSAITSVTDSAMDHWGQGTS
   ||                  |        |              |         |  
---NP-----------------YL--------D--------------T--------KG--
VTVSSAATTPPSVYPLAPGSAAQTNSMVTLGCLVKGYFPEPVTVTWNSGSLSSGVHTFPA
               |        |    |    |           |  || |       
---------------L------E-N----L--M-K-----------NT-SL-S--R----
VLQSDLYTLSSSVTVPSSTWPSETVTCNVAHPASSTKVDKKI
  |                |    |  |        |   | 
I-Q-----------I-KN-W----VS-N--R---RRK-E-KT
1j5o 1mnm  212 1422  320  14.91
PISPIETVPVKLKPGMDGPKVKQWPLTEEKIKALVEICTEMEKEGKISKIGPENPYNTPV
  |          |  |                |                      |   
--S--H-------P--D----------------L----------------------N---
FAIKKKDSTKWRKLVDFRELNKRTQDFWEVQLGIPHPAGLKKKKSVTVLDVGDAYFSVPL
            ||    ||       |      ||                  |     
------------KLL---EL-------W------PH-----------I-Q--E-Y-----
DEDFRKYTAFTIPSINNETPGIRYQYNVLPQGWKGSPAIFQSSMTKILEPFKKQNPDIVI
  |     |                         |           |       | |  |
-QDL----A------------LK--H--------G-----------I-------N-D--I
YQYIDDLYVGSDLEIGQHRTKIEELRQHLLRWGLTTPDKKHQKEPPFLWMGYELHPDKWT
 |  |    |     |    |   | |  |   | |              |         
FQ--DN---G-----G----KL--L-Q-VL---LIT--------------G---------
VQPIVLPEKDSWTVNDIQKLVGKLNWASQIYPGIKVRQLSKLLRGTKALTEVIPLTEEAE
     |      |       |  |       ||   |       |               
-----L------T-------V--L-------PG---RE------G---------------
LELAENREILKEPVHGVYYDPSKDLIAEIQKQGQGQWTYQIYQEPFKNLKTGKYARMRGA
     |          |  |      |       ||     | |    |   |       
-----N-----D---AV--D---N--A-------GQ---E-Y-E----L---K-S-I---
HTNDVKQLTEAVQKITTESIVIWGKTPKFKLPIQKETWETWWTEYWQATWIPEWEFVNTP
  |    ||    |         |    |             |              |  
--N-I-DLT----K---------G----F----------S--T-H-------H-H-MN--
PLVKLWYQLEKEPIVGAETFYVDGAANRETKLGKAGYVTNKGRQKVVPLTNTTNQKTELQ
| |          |           |       |  |     ||  ||            
P-V----------I-------I---A-------K--Y-----RQ--VP-----------W
AIYLALQDSGLEVNIVTDSQYALGIIQAQPDKSESELVNQIIEQLIKKEKVYLAWVPAHK
 |  |         |     |  | | |             ||  |     |        
-IF-A---------I-----YR-G-I-A-------------IE-AI-----Y--------
GIGGNEQVDKLVSAGIRKPISPIETVPVKLKPGMDGPKVKQWPLTEEKIKALVEICTEME
                |      |  |   |   |                |        
----------------R-----LE--P---K---D----------------L--------
KEGKISKIGPENPYNTPVFAIKKKDSTKWRKLVDFRELNKRTQDFWEVQLGIPHPAGLKK
 |           |          |  ||      |   |     |              
-E-----F-----Y----Y-----D--KW----E-R---K-----W-------Y------
KKSVTVLDVGDAYFSVPLDEDFRKYTAFTIPSINNETPGIRYQYNVLPQGWKGSPAIFQS
  |    | |          |           | |         |         |     
--S----D-G--H------KD-----------I-N---------N---------P-----
SMTKILEPFKKQNPDIVIYQYIDDLYVGSDLEIGQHRTKIEELRQHLLRWGLTTPDKKHQ
   ||        |  |        ||              |   |    |  |      
---KI--------P--V--K-----YV---M----------E---H----G--T------
KEPPFLWMGYELHPDKWTVQPIVLPEKDSWTVNDIQKLVGKLNWASQIYPGIKVRQLSKL
|        |  |||        |        |   ||   | |     |     |    
K----I---YS-HPD--------L--------N---KLL-EL-W-----P--HI-Q----
LRGTKALTEVIPLTEEAELELAENREILKEPVHGVYYDPSKDLIAEIQKQGQGQWTYQIY
        |           ||     ||   ||       |                | 
--------E---Y----Q-DLA-----LK---HGI----N-D----------------IF
QEPFKNLKTGKYARMRGAHTNDVKQLTEAVQKITTESIVIWGKTPKFKLPIQKETWETWW
|    |   |      |      | |                      |           
QD---N---G------G------K-L----------------------L-----------
TEYWQATWIPEWEFVNTPPLVKLWYQLEDIQMTQTTSSLSASLGDRVTISCSASQDISSY
    |               | |   |  |     |       |                
----Q---------------V-L---L--I-----T-------G----------------
LNWYQQKPEGTVKLLIYYTSSLHSGVPSAFSGSGSGTDYSLTISNLEPEDFATYYCQQYS
|         ||         |    |    |   | |      |      |        
L---------TV---------L----P----GR-EGND-A--VDN------A--------
KFPWTFGGGTKLEIKRADAAPTVSIFPPSSEQLTSGGASVVCFLNNFYPKDINVAWAIDG
        |   |                 |            |     | ||    || 
--------G-Q-E------------Y----E------------L-----KSIN----ID-
SAAANGVLNSWTDQDSKDSTYSMSSTLTLTADEYEAANSYTCAATHKTSTSPIVKSFNAN
       |   |    |       |    |               |     |      | 
-------L---T----K-G-F---S----T---H-----H-----H---MNPVI--I-A-
ECQITLKESGPGIVQPSQPFRLTCTFSGFSLSTSGIGVTWIRQPSGKGLEWLATIWWDDD
             |    |         |      |     |   |   |  | |     
--K--YRQ-----V----PW-I------F----A-I---Y-R---GIAIE--A-I-----
NRYNPSLKSRLTVSKDTSNNQAFLNMMTVETADTAIYYCAQSAITSVTDSAMDHWGQGTS
  |      ||   ||       |     |      ||          |     |     
--Y------RLE-PKD-------L-----E-----FYY----------DK----W-E---
VTVSSAATTPPSVYPLAPGSAAQTNSMVTLGCLVKGYFPEPVTVTWNSGSLSSGVHTFPA
             |     |          |   |           |           | 
---RK---W----Y-----S----D-----G--HK----D---I--N--N-PK-I---P-
VLQSDLYTLSSSVTVPSSTWPSETVTCNVAHPASSTKVDKKI
|     |     |         |       |    ||     
V-K---Y-----V-M-------E-------H---GTKI---Y
1j5o 1pvi  206 1422  312  14.49
PISPIETVPVKLKPGMDGPKVKQWPLTEEKIKALVEICTEMEKEGKISKIGPENPYNTPV
  |      |        |   |        |      |                |    
--S------V--------P--SQ--------K------T----------------Y----
FAIKKKDSTKWRKLVDFRELNKRTQDFWEVQLGIPHPAGLKKKKSVTVLDVGDAYFSVPL
                              |                    |        
------------------------------Q--------------------G--------
DEDFRKYTAFTIPSINNETPGIRYQYNVLPQGWKGSPAIFQSSMTKILEPFKKQNPDIVI
             |           |        |               |         
-------------S-----------Y--------G---------------F---------
YQYIDDLYVGSDLEIGQHRTKIEELRQHLLRWGLTTPDKKHQKEPPFLWMGYELHPDKWT
                         |   |  |             |      ||     
-------------------------R---L--G-------------F------LH-----
VQPIVLPEKDSWTVNDIQKLVGKLNWASQIYPGIKVRQLSKLLRGTKALTEVIPLTEEAE
          |          |    |       |    |     |         |    
----------S----------G--T-A-------K----S--V--T-C-------T----
LELAENREILKEPVHGVYYDPSKDLIAEIQKQGQGQWTYQIYQEPFKNLKTGKYARMRGA
                  | |     |                    |    |   |   
------------------YSP-----A-------------L------N----K---M---
HTNDVKQLTEAVQKITTESIVIWGKTPKFKLPIQKETWETWWTEYWQATWIPEWEFVNTP
      ||  |             ||     |              |  |        ||
F---C-QL--A-------------KT----CPV-------------Q-LWV---D--STP
PLVKLWYQLEKEPIVGAETFYVDGAANRETKLGKAGYVTNKGRQKVVPLTNTTNQKTELQ
|           |  |  |        |         |    |                 
P-----------P--G--T--------R---------V----R-----------------
AIYLALQDSGLEVNIVTDSQYALGIIQAQPDKSESELVNQIIEQLIKKEKVYLAWVPAHK
|   |         |     |          |  |        |              | 
A--MA---------I-----Y----------K-QS--------Q--------------H-
GIGGNEQVDKLVSAGIRKPISPIETVPVKLKPGMDGPKVKQWPLTEEKIKALVEICTEME
     | |   |    |                                      |    
-M--TE-V---V----R--------------------------------R-----C----
KEGKISKIGPENPYNTPVFAIKKKDSTKWRKLVDFRELNKRTQDFWEVQLGIPHPAGLKK
            |                       |   |                   
------------PHH---------------------E---R--------------C----
KKSVTVLDVGDAYFSVPLDEDFRKYTAFTIPSINNETPGIRYQYNVLPQGWKGSPAIFQS
  |       |   |     |                 |       |        |    
--S-------D---S-----D-----------------G-------L--------A----
SMTKILEPFKKQNPDIVIYQYIDDLYVGSDLEIGQHRTKIEELRQHLLRWGLTTPDKKHQ
       |     |                              ||| |           
-------P-----P------------------------------QHLIR-----------
KEPPFLWMGYELHPDKWTVQPIVLPEKDSWTVNDIQKLVGKLNWASQIYPGIKVRQLSKL
                      |  |             |  |                 
----------------------V--E-------------G--N-----------------
LRGTKALTEVIPLTEEAELELAENREILKEPVHGVYYDPSKDLIAEIQKQGQGQWTYQIY
||       |                   |     | |   |                  
LR-------V-------------------E-----YLD---D------------------
QEPFKNLKTGKYARMRGAHTNDVKQLTEAVQKITTESIVIWGKTPKFKLPIQKETWETWW
     |  |      |  |                 | |          |          
----RN--T--F---R--H-----------------SVVV---------P----------
TEYWQATWIPEWEFVNTPPLVKLWYQLEDIQMTQTTSSLSASLGDRVTISCSASQDISSY
  |         |    ||        |             |  |     |         
--Y---------E----PP--------E-V----------GS--D-----C---------
LNWYQQKPEGTVKLLIYYTSSLHSGVPSAFSGSGSGTDYSLTISNLEPEDFATYYCQQYS
          |       |   |               |     |        | |    
----------T-------T--IH---------------Y-----N--------YMC----
KFPWTFGGGTKLEIKRADAAPTVSIFPPSSEQLTSGGASVVCFLNNFYPKDINVAWAIDG
                                  |   |  |                 |
-----------------------------N----S---S--C-M---------------G
SAAANGVLNSWTDQDSKDSTYSMSSTLTLTADEYEAANSYTCAATHKTSTSPIVKSFNAN
     |                |              |             ||       
-----G----------------M--------------N-------RR----PIL-TI---
ECQITLKESGPGIVQPSQPFRLTCTFSGFSLSTSGIGVTWIRQPSGKGLEWLATIWWDDD
   ||| |        |         ||  |                |            
---ITL-E------D-S---------SG-NL---------L------G------------
NRYNPSLKSRLTVSKDTSNNQAFLNMMTVETADTAIYYCAQSAITSVTDSAMDHWGQGTS
 | |             |    |      |        |                     
-R-N-------------S----F------E---VRV--C---------------------
VTVSSAATTPPSVYPLAPGSAAQTNSMVTLGCLVKGYFPEPVTVTWNSGSLSSGVHTFPA
                     |         |        |            |      
---------------------A---------C--------P------------G------
VLQSDLYTLSSSVTVPSSTWPSETVTCNVAHPASSTKVDKKI
    |        |        |    |              
--R-D-----RR-T---E---EE----N-------------L
1j5o 1tsr  143 1422  194  10.06
PISPIETVPVKLKPGMDGPKVKQWPLTEEKIKALVEICTEMEKEGKISKIGPENPYNTPV
            | |  |     |       |            |     |     | | 
------------K-G--G-----W-F---G-K---------HR-GQ-G--G--S--N-P-
FAIKKKDSTKWRKLVDFRELNKRTQDFWEVQLGIPHPAGLKKKKSVTVLDVGDAYFSVPL
            |   | | |       |   |    | |        |    |  |   
------------K---F-E-N--IA---E---GL-R-A-L--------L----AR-S-HV
DEDFRKYTAFTIPSINNETPGIRYQYNVLPQGWKGSPAIFQSSMTKILEPFKKQNPDIVI
 |  |  |  |      |  |           |                 |       | 
-E--R--T--T-----DE--G------T----W-----V--AG---V---F-------V-
YQYIDDLYVGSDLEIGQHRTKIEELRQHLLRWGLTTPDKKHQKEPPFLWMGYELHPDKWT
       | |     |    |             |            |   |        
-------Y-G-----G---SK-------------TS-----------L---Y--------
VQPIVLPEKDSWTVNDIQKLVGKLNWASQIYPGIKVRQLSKLLRGTKALTEVIPLTEEAE
              |        |            |      ||| ||   ||      
--------------N--------L------------R------RGT-AL--AIP------
LELAENREILKEPVHGVYYDPSKDLIAEIQKQGQGQWTYQIYQEPFKNLKTGKYARMRGA
      |  |  |        |  |                   ||     |    |   
-Q-C--R--L-TP---L----SR-L-------------------PF-----G----M---
HTNDVKQLTEAVQKITTESIVIWGKTPKFKLPIQKETWETWWTEYWQATWIPEWEFVNTP
          |            |  |    |              |    |        
----------A-------P----G--P--G-P--------------Q----P-----G--
PLVKLWYQLEKEPIVGAETFYVDGAANRETKLGKAGYVTNKGRQKVVPLTNTTNQKTELQ
||       |   ||     |                                       
PL-R-----E-S-IV-C---Y---------------F---------------------M-
AIYLALQDSGLEVNIVTDSQYALGIIQAQPDKSESELVNQIIEQLIKKEKVYLAWVPAHK
     ||         |       |  |       | |      |  |     |     |
-VF--LQ---------T---H---IF-A-------E-V------L--KD----A-I---K
GIGGNEQVDKLVSAGIRKPISPIETVPVKLKPGMDGPKVKQWPLTEEKIKALVEICTEME
        | ||            |     |     |     | |          |    
--------D-LV----------M-T-----K-----P-A---P-T----------C----
KEGKISKIGPENPYNTPVFAIKKKDSTKWRKLVDFRELNKRTQDFWEVQLGIPHPAGLKK
    |          | |       |        |        |                
---NI-RV-------T-V-C-----S--------F--------D----------------
KKSVTVLDVGDAYFSVPLDEDFRKYTAFTIPSINNETPGIRYQYNVLPQGWKGSPAIFQS
       | |     |    |         |       |          ||         
-------D-G-----V----D--------LP----K--G----------GW---------
SMTKILEPFKKQNPDIVIYQYIDDLYVGSDLEIGQHRTKIEELRQHLLRWGLTTPDKKHQ
        |                        |    |      |  | |        |
--------F------------------------G----K------H--R-G--------Q
KEPPFLWMGYELHPDKWTVQPIVLPEKDSWTVNDIQKLVGKLNWASQIYPGIKVRQLSKL
        |    | |         |      | |         |     |         
------G-G-S-NP-KF--------E------N-I---------A-E---G---------
LRGTKALTEVIPLTEEAELELAENREILKEPVHGVYYDPSKDLIAEIQKQGQGQWTYQIY
||              | | ||  |       | |                         
LR--------------A-L-LA--R----S--H-V-------------------------
QEPFKNLKTGKYARMRGAHTNDVKQLTEAVQKITTESIVIWGKTPKFKLPIQKETWETWW
 |      |          | |             |     |               | |
-E-----RT----------T-D-------------E-----G---------------T-W
TEYWQATWIPEWEFVNTPPLVKLWYQLEDIQMTQTTSSLSASLGDRVTISCSASQDISSY
     |       |      |   |                  |   |     |     |
V----A-GV----F------V---Y----------------G-GSK-T-----S--L--Y
LNWYQQKPEGTVKLLIYYTSSLHSGVPSAFSGSGSGTDYSLTISNLEPEDFATYYCQQYS
 |       |        |  |      |             |    |       |    
-N-L-RR--G--------T-AL------A-------------I----PQ------C----
KFPWTFGGGTKLEIKRADAAPTVSIFPPSSEQLTSGGASVVCFLNNFYPKDINVAWAIDG
           |         |     |    | |        |    |           
----------RL---------T-----P----L-S---R----L----P------F----
SAAANGVLNSWTDQDSKDSTYSMSSTLTLTADEYEAANSYTCAATHKTSTSPIVKSFNAN
     |                |                    |       |        
-----G----------------M--------------------A-------P--------
ECQITLKESGPGIVQPSQPFRLTCTFSGFSLSTSGIGVTWIRQPSGKGLEWLATIWWDDD
         |||   | ||        |  |          |  |               
---------GPG---P-QP--------G-PL----------RE-S------I--V-C---
NRYNPSLKSRLTVSKDTSNNQAFLNMMTVETADTAIYYCAQSAITSVTDSAMDHWGQGTS
  |         |         ||      |    |   |        | |         
--Y---F---M-V---------FL-----QT-H--I-F-AE--V--LKD-AI----K--D
VTVSSAATTPPSVYPLAPGSAAQTNSMVTLGCLVKGYFPEPVTVTWNSGSLSSGVHTFPA
  |     |     | ||          |  |         |||     |   |      
L-V----MT--K--P-AP----------T--CNIR------VTV---C-SFDDG------
VLQSDLYTLSSSVTVPSSTWPSETVTCNVAHPASSTKVDKKI
|   |   |                      |          
V---D---L----------------------P----------
1j5o 1b3t  195 1422  294  13.71
PISPIETVPVKLKPGM--DG-PK-VKQWP-L---TEEKIK-ALVE---ICTEM-EK-EGK
   |     |    |         | |       | ||   |  |   |         ||
-MKPVTLYDVAEYAGVSYQTVSRVVNQASHVSAKTREKVEAAMAELNYIPNRVAQQLAGK
ISKIGPENPYNTPVFAIKKKDSTKWRKLVDFRELNKRTQDFWE--V-QLG-IPH-PA-GL
 |   |   |     |      |  |           |    |     |  ||   |  |
QSLMKPVTLYDVAEYA-GVSYQTVSRVVNQASHVSAKTREKVEAAMAELNYIPNRVAQQL
--KKK--KSVTVLDVGDAYFSVPLDEDFRKYT-AFTIPSINNE-TPGIRYQYNVLPQGWK
  |    | ||  ||   |  |      |    |        |         |  |    
AGKQSLMKPVTLYDVAE-YAGVSYQTVSRVVNQASHVSAKTREKVEAAMAELNYIPNRVA
GSPAIFQSSMTKILEPFKKQNPDIVIYQYIDDLYVGSDLEI-GQHRTKIE-ELRQ-HLL-
   |  || | |            | ||      |          | | |          
QQLAGKQSLM-KPVTLYDVAEYAGVSYQTVSRV-VNQASHVSAKTREKVEAAMAELNYIP
-RWGLTTPDKKHQKEPPFLWMGYELHPDKW-TVQPIVLPEKDSWTVNDIQKLVGKLNWAS
 |       |     |  |    |       ||   |             |         
NRVAQQLAGKQSLMKPVTLYDVAEYAGVSYQTVSRVV-NQASHVSAKTREKVEAAMAELN
QIYPGIKVRQLSKLLRGTKALTEVIPLTEEAELELAENREILKEPVHGVYYDPSKDLIAE
 | |   | |    | |   |     |   ||             |        |     
YI-PN-RVAQ--Q-LAGKQSLMKPVTLYDVAEY-AGVSYQTVSRVVNQASHVSAKTR-EK
IQKQGQGQWTYQIYQEPFKNLKTGKYARMRGAHTNDVKQLTEAVQKITTESIVIWGKTPK
          | |       |  ||   |      ||      |    | | |       
VE-AAMAELNY-IPNRVAQQL-AGKQSLMKPVTLYDVAEYA-GV-SYQTVSRVV-NQASH
FKLPIQKETWETWWTEYWQATWIPEWEFVNTPPLVKLWYQLEKEPIVGAETF-YVDGAAN
       |  |    |      ||    |    |      | | |        |  |   
VSAK-TREKVEAAMAE---LNYIPN-R-V-AQQLAGK-QSLMK-PVTLYDVAEYA-GVSY
RE-TK-LGKAGYVTNKGRQKVVPLTNTTNQKTELQAIYLALQDSGLE-VNIVTDSQYALG
         |  |  | | ||       |      |  ||   |    |       || |
QTVSRVVNQASHVSAKTREKVEAAMAELNYIPNRVAQQLAGKQSLMKPVTLYDVAEYA-G
IIQAQPDKSESELVNQIIEQLIK-KEKVYLAWVPAHKGIGGNEQVDKLV-SAGIRKPIS-
    |     |  |||      |  |||  |       |  |     |       ||   
-VSYQ---TVSRVVNQASHVSAKTREKVEAAMAELNY-I-PNRVAQQLAGKQSLMKPVTL
-PI-ETVPVKLKP-GMDGPKVKQWPL-TEEKIK-ALVE---ICTEM-EK-EGKISKIGPE
    |   |                  | ||   |  |   |         || |   | 
YDVAEYAGVSYQTVSRVVNQASHVSAKTREKVEAAMAELNYIPNRVAQQLAGKQSLMKPV
NPYNTPVFAIKKKDSTKWRKLVDFRELNKRTQDFWE--V-QLG-IPH-PA-GL--KKK--
  |     |      |  |           |    |     |  ||   |  |  |    
TLYDVAEYA-GVSYQTVSRVVNQASHVSAKTREKVEAAMAELNYIPNRVAQQLAGKQSLM
KSVTVLDVGDAYFSVPLDEDFRKYT-AFTIPSINNE-TPGIRYQYNVLPQGWKGSPAIFQ
| ||  ||   |  |      |    |        |         |  |       |  |
KPVTLYDVAE-YAGVSYQTVSRVVNQASHVSAKTREKVEAAMAELNYIPNRVAQQLAGKQ
SSMTKILEPFKKQNPDIVIYQYIDDLYVGSDLEI-GQHRTKIEELRQHLLRWGLTTPDKK
| | |            | ||      |          | | |      |      |   
SLM-KPVTLYDVAEYAGVSYQTVSRV-VNQASHVSAKTREKVEAAMAE-LNY-I--PNRV
HQKEPPFLWMGYELHPDKWTVQPIVLPEKDSWT-VNDIQKLVGK-LNWASQIYPGIKVRQ
 |     |  |           |  |        |   |  |    | ||      | | 
AQ-Q---L-AG-K---QS-LMKPVTLYDVAEYAGVS-YQ-TVSRVVNQASHV--SAKTRE
LSKLLRGTKALTEVIPLTEEAELELAENREILKEPVHGVYYDPSKDLIAEIQKQGQGQWT
  |      |    ||    |   ||      | ||    ||      |    |      
--K-VEAAMAELNYIP-NRVAQ-QLAGKQSLMK-PV--TLYDVA-E-YAGVSYQTVSR-V
YQIYQEPFKNLKTGKYARMRGAHTNDVKQLTEAVQKITTESIVIWGKTPKFKLPIQ-KET
    |      ||        |       |               ||    | |      
--VNQASHVSAKT-R-EKVE-A-A--MAELNYIPNRV-AQQLA--GKQSLMK-PVTLYDV
WETWWTEYWQATWIPEWEFVNTPPLVKLWYQLEDIQMTQTTSSLSASLGDRVTISCSASQ
 |     | | |       ||    |      |          |      ||       |
AEYAGVSY-Q-T-V-S-RVVNQASHVSAKTR-EKVE-A-AMAELN-YIPNRVAQQLAGKQ
DISSYLNWYQQKPEGTVKLLIYYTSSLHSGVPSAFSG-SGSGTDYSLTISNLEPEDFATY
        |    |       | | |      |  |              |  |   |  
SLMKPVTLY-DVAE-YAG-VSYQTVSRVVNQASHVSAKTREKVEAAMAELNYIPNRVAQQ
YCQQYSKF-PWTFGGGTKLEIKRADAAPTVS-IFPPSSEQLTSGGASV-VCFLN-NFYPK
     |   | |       |        |||      |         |       |  | 
LAGKQSLMKPVTL-YDV-AEYAGV-SYQTVSRVVNQASHVSAKTREKVEAAMAELNYIP-
DINVAWAIDGSAAANGVLNSWTDQDSKDSTYSMSSTLTLTADEYEAANSYTCAATHKTST
   ||    |           |  |     |   |  |        | |   | |     
N-RVAQQLAGK---QSLMKPVTLYDVAE--YAGVSYQTVSR-VVNQA-SHVSAKT-REKV
SPIVKSFNANECQITLKESG-PGIVQPSQPFRLTCTFSGFSLST-SGIGVTWIRQPSGKG
       |           |      |           | |  | |   |      | | 
EAAMAELNYIPNRVAQQLAGKQSLMKPVTLYDV-AEYAGVSYQTVSRV-VNQASHVSAKT
LEWLATIWWDDDNRYNPSLKSRLTVSKDTSNNQAFLNMMTV-ETADTA-IYYCAQSAITS
 |          | | |    |  |       |      |    |  |   |  |     
REKVEAA-MAELN-YIP---NR--VAQQLAGKQSLMKPVTLYDVAEYAGVSY--QT-VSR
VTDSAMDHWGQGTSVTVSSAATTPPSVYPLAPGSAAQTNSMVTLGCLVKGYFPEPVTVTW
|   |  |    |   |  ||      |   |   ||       |   |     |||   
VVNQA-SHVSAKTREKV-EAAMAELN-Y-I-PNRVAQ--QL-A-G---KQSLMKPVTL-Y
NSGSLSSGVHTFPAVLQSDLYTLSSSVTVPS-STWPSETVTCN-VAHPASSTKVDKK-I
       ||     |  |      | |               |            |   
DVAEY-AGV-SYQTV--SRVVNQASHVSAKTREKVEAAMAELNYIPNRVAQQLAGKQSL
1j5o 1cjg  303 1422 1364  21.31
PISPIETVPVKLKPGMDGPKVKQWPLTEEKIKALVEICTEMEKEGKISKIGPENPYNTPV
                                                            
------------------------------------------------------------
FAIKKKDSTKWRKLVDFRELNKRTQDFWEVQLGIPHPAGLKKKKSVTVLDVGDAYFSVPL
                     |             |                        
---------------------K-------------H------------------------
DEDFRKYTAFTIPSINNETPGIRYQYNVLPQGWKGSPAIFQSSMTKILEPFKKQNPDIVI
                                                            
------------------------------------------------------------
YQYIDDLYVGSDLEIGQHRTKIEELRQHLLRWGLTTPDKKHQKEPPFLWMGYELHPDKWT
       |                      |                             
-------Y----------------------R-----------------------------
VQPIVLPEKDSWTVNDIQKLVGKLNWASQIYPGIKVRQLSKLLRGTKALTEVIPLTEEAE
                                |  |||                      
--------------------------------G--VRQ----------------------
LELAENREILKEPVHGVYYDPSKDLIAEIQKQGQGQWTYQIYQEPFKNLKTGKYARMRGA
      |                                     |               
------R-------------------------------------P---------------
HTNDVKQLTEAVQKITTESIVIWGKTPKFKLPIQKETWETWWTEYWQATWIPEWEFVNTP
                      ||                                    
----------------------WG------------------------------------
PLVKLWYQLEKEPIVGAETFYVDGAANRETKLGKAGYVTNKGRQKVVPLTNTTNQKTELQ
          |        |                                        
----------K--------F----------------------------------------
AIYLALQDSGLEVNIVTDSQYALGIIQAQPDKSESELVNQIIEQLIKKEKVYLAWVPAHK
                                                     |   |  
-----------------------------------------------------A---A--
GIGGNEQVDKLVSAGIRKPISPIETVPVKLKPGMDGPKVKQWPLTEEKIKALVEICTEME
     |         ||                 |                         
-----E---------IR-----------------D-------------------------
KEGKISKIGPENPYNTPVFAIKKKDSTKWRKLVDFRELNKRTQDFWEVQLGIPHPAGLKK
                |  |          |       |                     
----------------P--A----------K-------N---------------------
KKSVTVLDVGDAYFSVPLDEDFRKYTAFTIPSINNETPGIRYQYNVLPQGWKGSPAIFQS
         |                |             |    |    |         
---------G----------------A-------------R----V----W---------
SMTKILEPFKKQNPDIVIYQYIDDLYVGSDLEIGQHRTKIEELRQHLLRWGLTTPDKKHQ
                                               |  |  |      
-----------------------------------------------L--G--T------
KEPPFLWMGYELHPDKWTVQPIVLPEKDSWTVNDIQKLVGKLNWASQIYPGIKVRQLSKL
    |                                                       
----F-------------------------------------------------------
LRGTKALTEVIPLTEEAELELAENREILKEPVHGVYYDPSKDLIAEIQKQGQGQWTYQIY
        |    |       |       |           |                  
--------E----T-------A-------E-----------D------------------
QEPFKNLKTGKYARMRGAHTNDVKQLTEAVQKITTESIVIWGKTPKFKLPIQKETWETWW
                 |          |                   |           
-----------------A----------A-------------------L-----------
TEYWQATWIPEWEFVNTPPLVKLWYQLEDIQMTQTTSSLSASLGDRVTISCSASQDISSY
     |                  |                   ||              
-----A------------------Y-------------------DR--------------
LNWYQQKPEGTVKLLIYYTSSLHSGVPSAFSGSGSGTDYSLTISNLEPEDFATYYCQQYS
                            |                      |        
----------------------------A----------------------A--------
KFPWTFGGGTKLEIKRADAAPTVSIFPPSSEQLTSGGASVVCFLNNFYPKDINVAWAIDG
     |         |                                            
-----F---------R--------------------------------------------
SAAANGVLNSWTDQDSKDSTYSMSSTLTLTADEYEAANSYTCAATHKTSTSPIVKSFNAN
                      |                                     
----------------------M-------------------------------------
ECQITLKESGPGIVQPSQPFRLTCTFSGFSLSTSGIGVTWIRQPSGKGLEWLATIWWDDD
                                         |     |            
-----------------------------------------R-----G------------
NRYNPSLKSRLTVSKDTSNNQAFLNMMTVETADTAIYYCAQSAITSVTDSAMDHWGQGTS
        ||                                                  
--------SR--------------------------------------------------
VTVSSAATTPPSVYPLAPGSAAQTNSMVTLGCLVKGYFPEPVTVTWNSGSLSSGVHTFPA
                     |       |  |             |          || 
---------------------A-------L--L-------------N----------FP-
VLQSDLYTLSSSVTVPSSTWPSETVTCNVAHPASSTKVDKKI
        |                            |    
--------L---------------------------RV----
1j5o 1gcc   62 1422   63   4.36
PISPIETVPVKLKPGMDGPKVKQWPLTEEKIKALVEICTEMEKEGKISKIGPENPYNTPV
                  |    |         |     ||        |      |   
----------RMR-----P----W---------L-----EM--Q-----I------N---
FAIKKKDSTKWRKLVDFRELNKRTQDFWEVQLGIPHPAGLKKKKSVTVLDVGDAYFSVPL
       |            |         |  |  |              |       |
-------S------------N---------Q--I--P--------------G-------L
DEDFRKYTAFTIPSINNETPGIRYQYNVLPQGWKGSPAIFQSSMTKILEPFKKQNPDIVI
                     |          |             |       |     
---------------------I----------W-------------I-------N-----
YQYIDDLYVGSDLEIGQHRTKIEELRQHLLRWGLTTPDKKHQKEPPFLWMGYELHPDKWT
                    | ||                      |             
--------------------K-EE-----M---I------------F-------------
VQPIVLPEKDSWTVNDIQKLVGKLNWASQIYPGIKVRQLSKLLRGTKALTEVIPLTEEAE
 | |  |    |          |                                   | 
-Q-I--P----W----------K-------H---------------------------A-
LELAENREILKEPVHGVYYDPSKDLIAEIQKQGQGQWTYQIYQEPFKNLKTGKYARMRGA
   |      |   |                   | |   |      |    |       
---A------K---H-------------------G-W--DI------N----K-------
HTNDVKQLTEAVQKITTESIVIWGKTPKFKLPIQKETWETWWTEYWQATWIPEWEFVNTP
   |      |                 |                | |  |         
---D------A---------CL------F-----R-------S--W-A--I---------
PLVKLWYQLEKEPIVGAETFYVDGAANRETKLGKAGYVTNKGRQKVVPLTNTTNQKTELQ
                  |    |   |        |                  |    
------H-----------T----G---R--------Y------------------K----
AIYLALQDSGLEVNIVTDSQYALGIIQAQPDKSESELVNQIIEQLIKKEKVYLAWVPAHK
                     | |                  |    ||       |   
---------------------A-G------------------E----KE-------P---
GIGGNEQVDKLVSAGIRKPISPIETVPVKLKPGMDGPKVKQWPLTEEKIKALVEICTEME
        |            |  |                |       ||         
--------D------------P-KT----------------W-------KA---------
KEGKISKIGPENPYNTPVFAIKKKDSTKWRKLVDFRELNKRTQDFWEVQLGIPHPAGLKK
              |   |          |        |          |    |     
--------------N---F----------R-CA----MN--S-------L----P-----
KKSVTVLDVGDAYFSVPLDEDFRKYTAFTIPSINNETPGIRYQYNVLPQGWKGSPAIFQS
       |       |    |          |        |   |      |||     |
-------DI-E---EV---KD--Q-------S--------R---N------KGS-----S
SMTKILEPFKKQNPDIVIYQYIDDLYVGSDLEIGQHRTKIEELRQHLLRWGLTTPDKKHQ
                |        |                 |    |           
A---V-----R-----V--------Y-----------------R--MMR-----------
KEPPFLWMGYELHPDKWTVQPIVLPEKDSWTVNDIQKLVGKLNWASQIYPGIKVRQLSKL
             |  |      | |         |      |              |  
-------------P--W------L-E--------MQ--I---N--------------S--
LRGTKALTEVIPLTEEAELELAENREILKEPVHGVYYDPSKDLIAEIQKQGQGQWTYQIY
                       |  |   |  |        |   |       |   | 
-----------------------N-QI---P--G--------L---I-------W---I-
QEPFKNLKTGKYARMRGAHTNDVKQLTEAVQKITTESIVIWGKTPKFKLPIQKETWETWW
                    |  |   |       |   |      |             
--------------------N--K---E-------E--MI------F-------------
TEYWQATWIPEWEFVNTPPLVKLWYQLEDIQMTQTTSSLSASLGDRVTISCSASQDISSY
    |   || |         |                  |           |       
----Q---IP-W---------K--H---------------A-----------A-------
LNWYQQKPEGTVKLLIYYTSSLHSGVPSAFSGSGSGTDYSLTISNLEPEDFATYYCQQYS
            |         | |            |    | |               
------------K---------H-G----W-------D----I-N---------------
KFPWTFGGGTKLEIKRADAAPTVSIFPPSSEQLTSGGASVVCFLNNFYPKDINVAWAIDG
              |  |                   |   | |  |        |||  
--------------K--D-------------------A---C-L--F--R----SWAI--
SAAANGVLNSWTDQDSKDSTYSMSSTLTLTADEYEAANSYTCAATHKTSTSPIVKSFNAN
           |                           |              |   | 
--------H--T---GR----------------------Y--------------K---AG
ECQITLKESGPGIVQPSQPFRLTCTFSGFSLSTSGIGVTWIRQPSGKGLEWLATIWWDDD
|     ||       |  |                   ||      |     |       
E-----KE-------P-DP-K-----------------TW------K-----A-------
NRYNPSLKSRLTVSKDTSNNQAFLNMMTVETADTAIYYCAQSAITSVTDSAMDHWGQGTS
|        |           |  |       |  |          |     |   |   
N-F------R-------C---A-MN--SL--PD--I----E----EV--K--D---Q---
VTVSSAATTPPSVYPLAPGSAAQTNSMVTLGCLVKGYFPEPVTVTWNSGSLSSGVHTFPA
                   |    |         |             |  ||      |
-------------------S--R-N---------K-------------G--SS------A
VLQSDLYTLSSSVTVPSSTWPSETVTCNVAHPASSTKVDKKI
|     |                                   
V-R--VY---------------------------------RM
1j5o 1if1  153 1422  209  10.76
PISPIETVPVKLKPGMDGPKVKQWPLTEEKIKALVEICTEMEKEGKISKIGPENPYNTPV
               |                 |            | | |       | 
---------------M-----------------L------------I-K-G-------P-
FAIKKKDSTKWRKLVDFRELNKRTQDFWEVQLGIPHPAGLKKKKSVTVLDVGDAYFSVPL
                           |                  |             
---------------------------W------------------T-------------
DEDFRKYTAFTIPSINNETPGIRYQYNVLPQGWKGSPAIFQSSMTKILEPFKKQNPDIVI
     |           |                              |           
-----K-----------E------------------------------E-----------
YQYIDDLYVGSDLEIGQHRTKIEELRQHLLRWGLTTPDKKHQKEPPFLWMGYELHPDKWT
           |              |   |                             
-----------D--------------Q---R-----------------------------
VQPIVLPEKDSWTVNDIQKLVGKLNWASQIYPGIKVRQLSKLLRGTKALTEVIPLTEEAE
             |  |     ||           | |                      
-------------V--I-----KL-----------V-Q----------------------
LELAENREILKEPVHGVYYDPSKDLIAEIQKQGQGQWTYQIYQEPFKNLKTGKYARMRGA
          |       |               |         |       |    |  
----------K-------Y---------------G---------P-------K----R--
HTNDVKQLTEAVQKITTESIVIWGKTPKFKLPIQKETWETWWTEYWQATWIPEWEFVNTP
                                                            
------------------------------------------------------------
PLVKLWYQLEKEPIVGAETFYVDGAANRETKLGKAGYVTNKGRQKVVPLTNTTNQKTELQ
     |                                                      
-----W------------------------------------------------------
AIYLALQDSGLEVNIVTDSQYALGIIQAQPDKSESELVNQIIEQLIKKEKVYLAWVPAHK
        |      |         | |                     |        | 
--------S------V---------I-A---------------------K--------H-
GIGGNEQVDKLVSAGIRKPISPIETVPVKLKPGMDGPKVKQWPLTEEKIKALVEICTEME
         |    | |     |            |   ||              |    
-L-------K----G-R-----I------------G---KQ--------------C----
KEGKISKIGPENPYNTPVFAIKKKDSTKWRKLVDFRELNKRTQDFWEVQLGIPHPAGLKK
                                   ||   |    |       |      
-----------------------------------RE---R----W-------H------
KKSVTVLDVGDAYFSVPLDEDFRKYTAFTIPSINNETPGIRYQYNVLPQGWKGSPAIFQS
                                                            
------------------------------------------------------------
SMTKILEPFKKQNPDIVIYQYIDDLYVGSDLEIGQHRTKIEELRQHLLRWGLTTPDKKHQ
            |                                               
------------N-----------------------------------------------
KEPPFLWMGYELHPDKWTVQPIVLPEKDSWTVNDIQKLVGKLNWASQIYPGIKVRQLSKL
            |                                               
------------H-----------------------------------------------
LRGTKALTEVIPLTEEAELELAENREILKEPVHGVYYDPSKDLIAEIQKQGQGQWTYQIY
                    |  |              |                     
--------------------L--N--------------P---------------------
QEPFKNLKTGKYARMRGAHTNDVKQLTEAVQKITTESIVIWGKTPKFKLPIQKETWETWW
 |                    ||       |  | |                       
-E--------------------VK-------K--T-S-----------------------
TEYWQATWIPEWEFVNTPPLVKLWYQLEDIQMTQTTSSLSASLGDRVTISCSASQDISSY
   |  |   | |              |                ||  |       |   
---W--T---E-E--------------E----------------DR--I-------I---
LNWYQQKPEGTVKLLIYYTSSLHSGVPSAFSGSGSGTDYSLTISNLEPEDFATYYCQQYS
   | |                |                                     
---Y-Q--------------A-H-------------------------------------
KFPWTFGGGTKLEIKRADAAPTVSIFPPSSEQLTSGGASVVCFLNNFYPKDINVAWAIDG
              ||                |   |        |              
--------------KR----------------L---G--------N---R----------
SAAANGVLNSWTDQDSKDSTYSMSSTLTLTADEYEAANSYTCAATHKTSTSPIVKSFNAN
          |                   |   |                 |     | 
----------W-------------------A---E-----------------I-----A-
ECQITLKESGPGIVQPSQPFRLTCTFSGFSLSTSGIGVTWIRQPSGKGLEWLATIWWDDD
      |              |        |            |   |            
------K--------------L--------L------------P---G------------
NRYNPSLKSRLTVSKDTSNNQAFLNMMTVETADTAIYYCAQSAITSVTDSAMDHWGQGTS
         | |   |        |                 ||                
---------R-T---D--------N-----------------AI----------------
VTVSSAATTPPSVYPLAPGSAAQTNSMVTLGCLVKGYFPEPVTVTWNSGSLSSGVHTFPA
                                  |           |        |    
----------------------------------K-----------N--------H----
VLQSDLYTLSSSVTVPSSTWPSETVTCNVAHPASSTKVDKKI
                   |       |      ||    | 
-------------------W-------N------ST-MRRKV
1j5o 1mse   98 1422  105   6.89
PISPIETVPVKLKPGMDGPKVKQWPLTEEKIKALVEICTEMEKEGKISKIGPENPYNTPV
  |                       |     |    |                      
--S------------------R----T-----A----C----------------------
FAIKKKDSTKWRKLVDFRELNKRTQDFWEVQLGIPHPAGLKKKKSVTVLDVGDAYFSVPL
         | |     | | |           |         |                
---------K-R--C--R-L-KK----------I---------K---------C------
DEDFRKYTAFTIPSINNETPGIRYQYNVLPQGWKGSPAIFQSSMTKILEPFKKQNPDIVI
  |                                     |       | |    |    
--D-------------------------------------Q-------E-F----P----
YQYIDDLYVGSDLEIGQHRTKIEELRQHLLRWGLTTPDKKHQKEPPFLWMGYELHPDKWT
          |         |         |           |    |    |       
----------S--------CK---------R---CA------K----L----E-------
VQPIVLPEKDSWTVNDIQKLVGKLNWASQIYPGIKVRQLSKLLRGTKALTEVIPLTEEAE
| | |     |    |               |               |       |    
V-PCV-----S--L-D---------------P---------------A-------T----
LELAENREILKEPVHGVYYDPSKDLIAEIQKQGQGQWTYQIYQEPFKNLKTGKYARMRGA
               |      ||                    |            |  
---------------G------KD----------------V---P------------R--
HTNDVKQLTEAVQKITTESIVIWGKTPKFKLPIQKETWETWWTEYWQATWIPEWEFVNTP
                  |                         |          |    
------------------S-------------------------Y-----V----F----
PLVKLWYQLEKEPIVGAETFYVDGAANRETKLGKAGYVTNKGRQKVVPLTNTTNQKTELQ
        |        |    |    |   |  |           |             
------F-L--------E----D----R---L--A-----------V-------------
AIYLALQDSGLEVNIVTDSQYALGIIQAQPDKSESELVNQIIEQLIKKEKVYLAWVPAHK
                                     |      |  ||  |        
----------M-----------M--------R-----V------L--KE--Y--------
GIGGNEQVDKLVSAGIRKPISPIETVPVKLKPGMDGPKVKQWPLTEEKIKALVEICTEME
              |            |      |       |             |   
--------------G------------V------D-------P-------------T---
KEGKISKIGPENPYNTPVFAIKKKDSTKWRKLVDFRELNKRTQDFWEVQLGIPHPAGLKK
      |             |                   |                   
------K-------------I-------------------R-------------------
KKSVTVLDVGDAYFSVPLDEDFRKYTAFTIPSINNETPGIRYQYNVLPQGWKGSPAIFQS
         |                        |    |              ||    
---------G------------------------N----I--------------PA----
SMTKILEPFKKQNPDIVIYQYIDDLYVGSDLEIGQHRTKIEELRQHLLRWGLTTPDKKHQ
  |                         ||                         |    
--T-------------------------SD-------------------------D----
KEPPFLWMGYELHPDKWTVQPIVLPEKDSWTVNDIQKLVGKLNWASQIYPGIKVRQLSKL
 | ||                            |       |          |    |  
-E-PF----------------------------D-------L----------K----S--
LRGTKALTEVIPLTEEAELELAENREILKEPVHGVYYDPSKDLIAEIQKQGQGQWTYQIY
 |           |       |                                      
-R-----------T-------A----------------------C---------------
QEPFKNLKTGKYARMRGAHTNDVKQLTEAVQKITTESIVIWGKTPKFKLPIQKETWETWW
          |  | |         |                   | |  | |       
----------K--RCR---------L-------------------K-K--I-K-------
TEYWQATWIPEWEFVNTPPLVKLWYQLEDIQMTQTTSSLSASLGDRVTISCSASQDISSY
    |       ||    |                    |     |    | |       
CD--Q-------EF----P--------------------SCK---R----C-A-------
LNWYQQKPEGTVKLLIYYTSSLHSGVPSAFSGSGSGTDYSLTISNLEPEDFATYYCQQYS
            |        |                         |       |   |
------------K--------L---------------E----V----P-------C--VS
KFPWTFGGGTKLEIKRADAAPTVSIFPPSSEQLTSGGASVVCFLNNFYPKDINVAWAIDG
           |     |         |     |  |            |        | 
-----------L-----D---------P-A---T--G------------K--------D-
SAAANGVLNSWTDQDSKDSTYSMSSTLTLTADEYEAANSYTCAATHKTSTSPIVKSFNAN
      |                                            |   |    
------V--------------------------------------------P--RSY---
ECQITLKESGPGIVQPSQPFRLTCTFSGFSLSTSGIGVTWIRQPSGKGLEWLATIWWDDD
             |           |  |                   ||         |
-------------V-----------F--F-------------------LE---------D
NRYNPSLKSRLTVSKDTSNNQAFLNMMTVETADTAIYYCAQSAITSVTDSAMDHWGQGTS
         |             |                  |   |    |        
---------R-------------L------------------A---V----M--------
VTVSSAATTPPSVYPLAPGSAAQTNSMVTLGCLVKGYFPEPVTVTWNSGSLSSGVHTFPA
                           |    | |    |             |      
---------------M------R----V----L-K----E-----Y-------G------
VLQSDLYTLSSSVTVPSSTWPSETVTCNVAHPASSTKVDKKI
|   |                          |   |      
V---D--------------------------P---T------
1j5o 1pyi  128 1422  158   9.00
PISPIETVPVKLKPGMDGPKVKQWPLTEEKIKALVEICTEMEKEGKISKIGPENPYNTPV
                          |   | |    |                      
--------------------------T---I-A----C----------------------
FAIKKKDSTKWRKLVDFRELNKRTQDFWEVQLGIPHPAGLKKKKSVTVLDVGDAYFSVPL
                                  ||       |       |        
----------------------------------PH-------K-------G--------
DEDFRKYTAFTIPSINNETPGIRYQYNVLPQGWKGSPAIFQSSMTKILEPFKKQNPDIVI
                  |              |         |      |         
--------C---------T--------------K---------M------F---------
YQYIDDLYVGSDLEIGQHRTKIEELRQHLLRWGLTTPDKKHQKEPPFLWMGYELHPDKWT
                              |                             
------------------------------R-----------------------------
VQPIVLPEKDSWTVNDIQKLVGKLNWASQIYPGIKVRQLSKLLRGTKALTEVIPLTEEAE
               |        |              |                  | 
---------------D--------N--------------S------------------A-
LELAENREILKEPVHGVYYDPSKDLIAEIQKQGQGQWTYQIYQEPFKNLKTGKYARMRGA
      |   |   |         |                         |         
--M---R---K---H---------L----------------H--------T---------
HTNDVKQLTEAVQKITTESIVIWGKTPKFKLPIQKETWETWWTEYWQATWIPEWEFVNTP
|                      |                                    
H----------------------G------------------------------------
PLVKLWYQLEKEPIVGAETFYVDGAANRETKLGKAGYVTNKGRQKVVPLTNTTNQKTELQ
            |                             |                 
------------P-----------------------------R-----------------
AIYLALQDSGLEVNIVTDSQYALGIIQAQPDKSESELVNQIIEQLIKKEKVYLAWVPAHK
                                                       |  | 
-------------------------------------------------------V--H-
GIGGNEQVDKLVSAGIRKPISPIETVPVKLKPGMDGPKVKQWPLTEEKIKALVEICTEME
           |                                      |  | |    
-----------V-C------------------------------------A--E-C----
KEGKISKIGPENPYNTPVFAIKKKDSTKWRKLVDFRELNKRTQDFWEVQLGIPHPAGLKK
  ||              |      |    |      | ||       ||   |      
--GK-A------------F-V---ESS---K------L-KR-----H-QL-V-H------
KKSVTVLDVGDAYFSVPLDEDFRKYTAFTIPSINNETPGIRYQYNVLPQGWKGSPAIFQS
    |    |                         |               |  |  || 
----T----G-------------------------E---------------K--P--FQ-
SMTKILEPFKKQNPDIVIYQYIDDLYVGSDLEIGQHRTKIEELRQHLLRWGLTTPDKKHQ
  |     |                      | |                |      |  
-CT-----F----------------------E-G-------------C--G------K--
KEPPFLWMGYELHPDKWTVQPIVLPEKDSWTVNDIQKLVGKLNWASQIYPGIKVRQLSKL
    |                                                    |  
R---F----------------------------------------------------S--
LRGTKALTEVIPLTEEAELELAENREILKEPVHGVYYDPSKDLIAEIQKQGQGQWTYQIY
                           |             |                  
---------------------------L-------------D------------------
QEPFKNLKTGKYARMRGAHTNDVKQLTEAVQKITTESIVIWGKTPKFKLPIQKETWETWW
   | || |         |                                         
---F-NLRT---------H-----------------------------------------
TEYWQATWIPEWEFVNTPPLVKLWYQLEDIQMTQTTSSLSASLGDRVTISCSASQDISSY
                    |                        |              
--------------------V------------------------R--------------
LNWYQQKPEGTVKLLIYYTSSLHSGVPSAFSGSGSGTDYSLTISNLEPEDFATYYCQQYS
               |      |                                     
---------------I------H-------------------------------------
KFPWTFGGGTKLEIKRADAAPTVSIFPPSSEQLTSGGASVVCFLNNFYPKDINVAWAIDG
    |   |      |           |                   |            
----T---G---D--R-----------P-------------------Y------------
SAAANGVLNSWTDQDSKDSTYSMSSTLTLTADEYEAANSYTCAATHKTSTSPIVKSFNAN
      |                                  |         |    |   
------V----------------------------------C---------P----F---
ECQITLKESGPGIVQPSQPFRLTCTFSGFSLSTSGIGVTWIRQPSGKGLEWLATIWWDDD
           |           |                                    
-------D---G-----------C------------------------------------
NRYNPSLKSRLTVSKDTSNNQAFLNMMTVETADTAIYYCAQSAITSVTDSAMDHWGQGTS
   |   |      |       |                           |     |   
---N---K------K-------F---------------------------A-----Q---
VTVSSAATTPPSVYPLAPGSAAQTNSMVTLGCLVKGYFPEPVTVTWNSGSLSSGVHTFPA
                   |   ||       | |                 |  |    
-------------------S---TN-------L-K-----------------S--H----
VLQSDLYTLSSSVTVPSSTWPSETVTCNVAHPASSTKVDKKI
        |                |    | |         
I-------L----------------T----H-A---------
1j5o 1ubd   97 1422  114   6.82
PISPIETVPVKLKPGMDGPKVKQWPLTEEKIKALVEICTEMEKEGKISKIGPENPYNTPV
                        | |      |                  |       
------------------------P-T------L------------------E-------
FAIKKKDSTKWRKLVDFRELNKRTQDFWEVQLGIPHPAGLKKKKSVTVLDVGDAYFSVPL
          |     |  |               |                        
----------W-----F--L---S-----------H-----------------CH--I--
DEDFRKYTAFTIPSINNETPGIRYQYNVLPQGWKGSPAIFQSSMTKILEPFKKQNPDIVI
     ||     ||                   |        | |               
----HKY-----PS-------------------K--------S-T---------------
YQYIDDLYVGSDLEIGQHRTKIEELRQHLLRWGLTTPDKKHQKEPPFLWMGYELHPDKWT
            |        |                  ||        | |    |  
------------L--------I------------------HQ--------G-E----K--
VQPIVLPEKDSWTVNDIQKLVGKLNWASQIYPGIKVRQLSKLLRGTKALTEVIPLTEEAE
       |    |          |      |  | |    |   |      |        
----A--E----T----------L-Y----Y--I-V----K---G----S-V--------
LELAENREILKEPVHGVYYDPSKDLIAEIQKQGQGQWTYQIYQEPFKNLKTGKYARMRGA
   |     |            ||   |               |       ||   |   
---A----VL------I-----KD---E---------------E-------GK--EM---
HTNDVKQLTEAVQKITTESIVIWGKTPKFKLPIQKETWETWWTEYWQATWIPEWEFVNTP
       |          |                         |            |  
----I--L----------S-------------------------Y-----L------N--
PLVKLWYQLEKEPIVGAETFYVDGAANRETKLGKAGYVTNKGRQKVVPLTNTTNQKTELQ
       |       |   |   |    |  |         |                | 
-------Q-------G-D-F-I-G----E--L---------G----------------L-
AIYLALQDSGLEVNIVTDSQYALGIIQAQPDKSESELVNQIIEQLIKKEKVYLAWVPAHK
           |           |    |     |                  ||     
--F--------E-------E---G----Q-ER--S------------------AW-----
GIGGNEQVDKLVSAGIRKPISPIETVPVKLKPGMDGPKVKQWPLTEEKIKALVEICTEME
           |    |                      |    |     |    |    
-----------V----R---A------------------K----T-----A----C----
KEGKISKIGPENPYNTPVFAIKKKDSTKWRKLVDFRELNKRTQDFWEVQLGIPHPAGLKK
          |      | |                          |    |        
----------E------V-A--------------------------E----I--------
KKSVTVLDVGDAYFSVPLDEDFRKYTAFTIPSINNETPGIRYQYNVLPQGWKGSPAIFQS
  |         |          |   |            | |   |         | | 
--S---------Y---------KK---F------------R-Q---L---------I-Q-
SMTKILEPFKKQNPDIVIYQYIDDLYVGSDLEIGQHRTKIEELRQHLLRWGLTTPDKKHQ
            ||               |         |                    
----V-------NP---------------D---------I--------------------
KEPPFLWMGYELHPDKWTVQPIVLPEKDSWTVNDIQKLVGKLNWASQIYPGIKVRQLSKL
     | |               |    |      |        |         |     
-----L-M-------R-------L----S--A---Q-----M--A---------R-----
LRGTKALTEVIPLTEEAELELAENREILKEPVHGVYYDPSKDLIAEIQKQGQGQWTYQIY
 |    |  |   |                         |     |  |           
-R----L-QV---T-------------------------S-----E--K---------V-
QEPFKNLKTGKYARMRGAHTNDVKQLTEAVQKITTESIVIWGKTPKFKLPIQKETWETWW
                |   |                           |           
----------------G---N---------------------------L-----------
TEYWQATWIPEWEFVNTPPLVKLWYQLEDIQMTQTTSSLSASLGDRVTISCSASQDISSY
     |       |            | |      |       | |  |   |       
-----A-------F------------L-DV-----T-------G-R--I---A-------
LNWYQQKPEGTVKLLIYYTSSLHSGVPSAFSGSGSGTDYSLTISNLEPEDFATYYCQQYS
     |            |  |                  |   ||     |     |  
-----Q------------T--L------------------L---NL-----A----KQ--
KFPWTFGGGTKLEIKRADAAPTVSIFPPSSEQLTSGGASVVCFLNNFYPKDINVAWAIDG
  |              | |             |              |         | 
--P--------------D-A------------MT-------------HP---------D-
SAAANGVLNSWTDQDSKDSTYSMSSTLTLTADEYEAANSYTCAATHKTSTSPIVKSFNAN
     |       |  |            |    |                 |       
-----G-M-----Q-IK-----------ITR-Q-E-----------------I------G
ECQITLKESGPGIVQPSQPFRLTCTFSGFSLSTSGIGVTWIRQPSGKGLEWLATIWWDDD
  ||       |           |         |       |       |   |      
--QI-V-----G-----------C---------S-------R-------E---TV-----
NRYNPSLKSRLTVSKDTSNNQAFLNMMTVETADTAIYYCAQSAITSVTDSAMDHWGQGTS
 |        |   |          |   |  |       |        ||  | |    
GR----I---L---K----------ML--E--D-------QN-L--I--SA--H-GK---
VTVSSAATTPPSVYPLAPGSAAQTNSMVTLGCLVKGYFPEPVTVTWNSGSLSSGVHTFPA
        |                  |     |  |                |      
--------T---I--------------V-----V--Y----------------G------
VLQSDLYTLSSSVTVPSSTWPSETVTCNVAHPASSTKVDKKI
                                          
------------------------------------------
1j5o 1ber  152 1422  199  10.69
PISPIETVPVKLKPGMDGPKVKQWPLTEEKIKALVEICTEMEKEGKISKIGPENPYNTPV
     |                 |                       |  | |  |  | 
--A--E-----------------W-----------------------S--G-E--YISP-
FAIKKKDSTKWRKLVDFRELNKRTQDFWEVQLGIPHPAGLKKKKSVTVLDVGDAYFSVPL
 |                          |      |  |   |||            |  
YA--------------------------E------H--G---KKS-------E---QV--
DEDFRKYTAFTIPSINNETPGIRYQYNVLPQGWKGSPAIFQSSMTKILEPFKKQNPDIVI
     |    |  ||    |        |                | |    |       
----KK---ITV-SI----P--------L----------------KVL----K-------
YQYIDDLYVGSDLEIGQHRTKIEELRQHLLRWGLTTPDKKHQKEPPFLWMGYELHPDKWT
   |  |    | |    ||     |    |                             
---I--L---TD-E----RT-----R----R-----------------------------
VQPIVLPEKDSWTVNDIQKLVGKLNWASQIYPGIKVRQLSKLLRGTKALTEVIPLTEEAE
 |           ||         |                 ||   |       |    
-Q-----------VN---------N-----------------LR--HA-------T----
LELAENREILKEPVHGVYYDPSKDLIAEIQKQGQGQWTYQIYQEPFKNLKTGKYARMRGA
     |               |  |  |                 |  |           
-----N---------------S-ELLCE---------A-------F--L-----------
HTNDVKQLTEAVQKITTESIVIWGKTPKFKLPIQKETWETWWTEYWQATWIPEWEFVNTP
|         |     |      |                      |             
H---------A---F-T------G----------------------Q-------------
PLVKLWYQLEKEPIVGAETFYVDGAANRETKLGKAGYVTNKGRQKVVPLTNTTNQKTELQ
|       |   |         |  |     |          |            | |  
P-------L---P----D----D--A--D--L----------R------------K-E--
AIYLALQDSGLEVNIVTDSQYALGIIQAQPDKSESELVNQIIEQLIKKEKVYLAWVPAHK
        |        |       |   |                  |    |   | |
------R-S--------D-E-----I---P------------------E----A---A-K
GIGGNEQVDKLVSAGIRKPISPIETVPVKLKPGMDGPKVKQWPLTEEKIKALVEICTEME
     |                |          |                       || 
-----E----------------I----------M---------------R-------EM-
KEGKISKIGPENPYNTPVFAIKKKDSTKWRKLVDFRELNKRTQDFWEVQLGIPHPAGLKK
  |    |      | |         | |       |        |              
--G----I------N-P-------E-T-W----EYAE--------W--------------
KKSVTVLDVGDAYFSVPLDEDFRKYTAFTIPSINNETPGIRYQYNVLPQGWKGSPAIFQS
  |      |         |    |    | |     |     |           |    
--S------G---------E----Y----I-S-----P-----Y-----------A----
SMTKILEPFKKQNPDIVIYQYIDDLYVGSDLEIGQHRTKIEELRQHLLRWGLTTPDKKHQ
                                         |   |    |      |  
-----------------------------------------E---H----G------K--
KEPPFLWMGYELHPDKWTVQPIVLPEKDSWTVNDIQKLVGKLNWASQIYPGIKVRQLSKL
|         |        |  |   |         |        | | |  ||      
K-------S-E--------Q--V---K---------K-I---T-VS-I-P-LKV------
LRGTKALTEVIPLTEEAELELAENREILKEPVHGVYYDPSKDLIAEIQKQGQGQWTYQIY
|   |     | ||        | |                                |  
L---K-----I-LT-----D--E-R--------------TR-------R--------QV-
QEPFKNLKTGKYARMRGAHTNDVKQLTEAVQKITTESIVIWGKTPKFKLPIQKETWETWW
     ||        |  |                                         
----NNL--------R--H-----------------------------------------
TEYWQATWIPEWEFVNTPPLVKLWYQLEDIQMTQTTSSLSASLGDRVTISCSASQDISSY
     ||        |           |          |   |       |         
-----AT--------NS----------E----------L---L-------C---------
LNWYQQKPEGTVKLLIYYTSSLHSGVPSAFSGSGSGTDYSLTISNLEPEDFATYYCQQYS
        |                   ||          |          |        
--------E-------------------AF----------L---H------A--------
KFPWTFGGGTKLEIKRADAAPTVSIFPPSSEQLTSGGASVVCFLNNFYPKDINVAWAIDG
 |  |   |                  |               |    | |       | 
-F--T---G---Q--------------P---------------L----P-D-------D-
SAAANGVLNSWTDQDSKDSTYSMSSTLTLTADEYEAANSYTCAATHKTSTSPIVKSFNAN
   |             |          |                               
---A-------------D----------L-------------------------R-----
ECQITLKESGPGIVQPSQPFRLTCTFSGFSLSTSGIGVTWIRQPSGKGLEWLATIWWDDD
      ||            |        |          |  |     |  |       
------KE------------R--------S-D-E------I--P-----E--A-------
NRYNPSLKSRLTVSKDTSNNQAFLNMMTVETADTAIYYCAQSAITSVTDSAMDHWGQGTS
              |           |  |                     |     |  
-------------AK-----E--I--MR-E---------------------M-----G--
VTVSSAATTPPSVYPLAPGSAAQTNSMVTLGCLVKGYFPEPVTVTWNSGSLSSGVHTFPA
                        |             ||    ||              
------------I-----------N-------------PE----TW--------------
VLQSDLYTLSSSVTVPSSTWPSETVTCNVAHPASSTKVDKKI
      |                                   
----E-Y-----------------------------------
1j5o 1cma  159 1422  208  11.18
PISPIETVPVKLKPGMDGPKVKQWPLTEEKIKALVEICTEMEKEGKISKIGPENPYNTPV
           |     |              |              |         |  
---------MRL---F-G-----Y--------A------------RVS---------T--
FAIKKKDSTKWRKLVDFRELNKRTQDFWEVQLGIPHPAGLKKKKSVTVLDVGDAYFSVPL
       |     | |        |    |       | |   |     | |     |  
-S--QQ-S-----L-D---I----Q----VR------A-L---K-----DAG-----V--
DEDFRKYTAFTIPSINNETPGIRYQYNVLPQGWKGSPAIFQSSMTKILEPFKKQNPDIVI
     |  |       |     |               ||    |           |   
-----K--A-------N-----R---------------IF----T-----------D---
YQYIDDLYVGSDLEIGQHRTKIEELRQHLLRWGLTTPDKKHQKEPPFLWMGYELHPDKWT
          |    |         |      ||   |         |         |  
-K-------AS----G---SS-SD-R----K-GL---D---------L-L--RM---K--
VQPIVLPEKDSWTVNDIQKLVGKLNWASQIYPGIKVRQLSKLLRGTKALTEVIPLTEEAE
|      | |   |  |  || |           |   |   | |          |  | 
VE-----EGD---V--I--LV-K-----------K---LDR-L-G-R---D----T--A-
LELAENREILKEPVHGVYYDPSKDLIAEIQKQGQGQWTYQIYQEPFKNLKTGKYARMRGA
        |               |   | |            | |              
-DM-----I--Q------------L---I-K------------E-F--------------
HTNDVKQLTEAVQKITTESIVIWGKTPKFKLPIQKETWETWWTEYWQATWIPEWEFVNTP
   |      | |          |                          |    |    
---D------A-Q----------G--------V---------------S-I---RF----
PLVKLWYQLEKEPIVGAETFYVDGAANRETKLGKAGYVTNKGRQKVVPLTNTTNQKTELQ
               |  |   ||    |   ||           ||         |   
--I------D-D---GIST---DG----E--MGK---M-------VV---------T---
AIYLALQDSGLEVNIVTDSQYALGIIQAQPDKSESELVNQIIEQLIKKEKVYLAWVPAHK
 |        |       |  |     ||      |       |        |       
-I--------L-------S--A---V-AQ-----AE---R---Q-----RI-L-------
GIGGNEQVDKLVSAGIRKPISPIETVPVKLKPGMDGPKVKQWPLTEEKIKALVEICTEME
     |          |       |          |    |     |   |       | 
-----E----------R-------T-------N-EG---RQ-----E---A-------MA
KEGKISKIGPENPYNTPVFAIKKKDSTKWRKLVDFRELNKRTQDFWEVQLGIPHPAGLKK
| |              ||        | ||  | |         |  |       |   
K-G----V---------VFG---R---K-RK-ID-RD---AVLNMWQ-Q-------G---
KKSVTVLDVGDAYFSVPLDEDFRKYTAFTIPSINNETPGIRYQYNVLPQGWKGSPAIFQS
      |  | |  |              | |    |       |          |    
------L--G-A--S---------H----I-S---KT--M----NI---------A--R-
SMTKILEPFKKQNPDIVIYQYIDDLYVGSDLEIGQHRTKIEELRQHLLRWGLTTPDKKHQ
| |             | |       |     |        |      |  |        
S-T-------------V-YK------V-----I--N-----E--SN-MR--L--------
KEPPFLWMGYELHPDKWTVQPIVLPEKDSWTVNDIQKLVGKLNWASQIYPGIKVRQLSKL
    |   ||            |     | |              ||        | |  
----F---GY--------AR--V-----S-T--------------SQ--------Q-S--
LRGTKALTEVIPLTEEAELELAENREILKEPVHGVYYDPSKDLIAEIQKQGQGQWTYQIY
      |   |             |  ||    ||     |   |             | 
------L-D-I--------QV---R-ALKD-A-GV-----K---A--NR---------I-
QEPFKNLKTGKYARMRGAHTNDVKQLTEAVQKITTESIVIWGKTPKFKLPIQKETWETWW
   |    | | |   |    |                         |     |  |   
---F----TDK-A--SGS-SSD-R---KG---L--D-L-L-----RMK--V--E--E---
TEYWQATWIPEWEFVNTPPLVKLWYQLEDIQMTQTTSSLSASLGDRVTISCSASQDISSY
                   |||    | |             || |         |    
GD------V-----I----LVK---KL-D----R--------LG-R---------D----
LNWYQQKPEGTVKLLIYYTSSLHSGVPSAFSGSGSGTDYSLTISNLEPEDFATYYCQQYS
                  |         |        |    |              |  
------------------T---------A--------D--M-I--------------Q--
KFPWTFGGGTKLEIKRADAAPTVSIFPPSSEQLTSGGASVVCFLNNFYPKDINVAWAIDG
           | ||          |     |    | |       |          || 
-----------L-IK--E-------F--DA-Q----GVS-I----RF----------ID-
SAAANGVLNSWTDQDSKDSTYSMSSTLTLTADEYEAANSYTCAATHKTSTSPIVKSFNAN
     |   | |  |       |  |  | |     |      |        |       
----DGI--S-T--DG-EMG-KMVVTI-LSA----VA-Q----A-ER-Q-R-IL------
ECQITLKESGPGIVQPSQPFRLTCTFSGFSLSTSGIGVTWIRQPSGKGLEWLATIWWDDD
|   |  |   |     |                |  |         |            
E-R-T-NE---G--R--Q--------E--AMA-KGV-V-F-------G------------
NRYNPSLKSRLTVSKDTSNNQAFLNMMTVETADTAIYYCAQSAITSVTDSAMDHWGQGTS
 |     | |    |                 | |                |  | ||  
-R-----K-R----K-------------ID-RD-AV-------L-----N-M--WQQG--
VTVSSAATTPPSVYPLAPGSAAQTNSMVTLGCLVKGYFPEPVTVTWNSGSLSSGVHTFPA
               |  |  |   |        |       |   |            |
---------------L--G--A---SHIS-----K-------TM--N-------I----A
VLQSDLYTLSSSVTVPSSTWPSETVTCNVAHPASSTKVDKKI
   |  |     |         |    |              
--RSTVY----KV-I------NE--S-N--------------
1j5o 1gdt  210 1422  366  14.77
PISPIETVPVKLKPGMDGPKVKQWPLTEEKIKALVEICTEMEKEGKISKIGPENPYNTPV
                               ||              |            
-------------------------------KA--------------S------------
FAIKKKDSTKWRKLVDFRELNKRTQDFWEVQLGIPHPAGLKKKKSVTVLDVGDAYFSVPL
|       |      |  |         |                    |     |   |
F-------T------D--E---------E--------------------D--E--F-I-L
DEDFRKYTAFTIPSINNETPGIRYQYNVLPQGWKGSPAIFQSSMTKILEPFKKQNPDIVI
  |                   |                             | ||    
--D-----------V------VR-----------------------------K-NP----
YQYIDDLYVGSDLEIGQHRTKIEELRQHLLRWGLTTPDKKHQKEPPFLWMGYELHPDKWT
                   |     |    |   ||    |      |   |    |   
-------------------T-----R----R---TT----H----T-L---Y----D---
VQPIVLPEKDSWTVNDIQKLVGKLNWASQIYPGIKVRQLSKLLRGTKALTEVIPLTEEAE
       |                         |     |                    
-------E-------------------------I-----S--------------------
LELAENREILKEPVHGVYYDPSKDLIAEIQKQGQGQWTYQIYQEPFKNLKTGKYARMRGA
              |                       |     |  |            
--------------H-----------------------Y-V---P--N------------
HTNDVKQLTEAVQKITTESIVIWGKTPKFKLPIQKETWETWWTEYWQATWIPEWEFVNTP
|               |      |                                 |  
H---------------T------G---------------------------------NS-
PLVKLWYQLEKEPIVGAETFYVDGAANRETKLGKAGYVTNKGRQKVVPLTNTTNQKTELQ
                   |       |        |   | |     |        |  
--IR--H---R--------F-------R---V----YL-SK-R-----L--------E--
AIYLALQDSGLEVNIVTDSQYALGIIQAQPDKSESELVNQIIEQLIKKEKVYLAWVPAHK
  |            |    |              | |           |          
--Y------------V----Y--------------E-V----------DK-F--------
GIGGNEQVDKLVSAGIRKPISPIETVPVKLKPGMDGPKVKQWPLTEEKIKALVEICTEME
   |     |||    |                 ||       |    ||      |   
---G-----KLV----R---D--D----------DG----N--L----IK------T---
KEGKISKIGPENPYNTPVFAIKKKDSTKWRKLVDFRELNKRTQDFWEVQLGIPHPAGLKK
   |        |   |   |         |    |   |    |               
---KV--L----P---P--SI---------K----R---K----F---------------
KKSVTVLDVGDAYFSVPLDEDFRKYTAFTIPSINNETPGIRYQYNVLPQGWKGSPAIFQS
  |        |      |||   |           |         |        ||   
--S--------A------DED---Y-----------T---------L--------AI---
SMTKILEPFKKQNPDIVIYQYIDDLYVGSDLEIGQHRTKIEELRQHLLRWGLTTPDKKHQ
         ||        |     |                      |      |    
A---V----KK--------QF----Y----------------------R------D----
KEPPFLWMGYELHPDKWTVQPIVLPEKDSWTVNDIQKLVGKLNWASQIYPGIKVRQLSKL
     |        |         |  |  |        |     |     |   | |  
-----L---FQI--D---------P--D--T--------GR----S-L---IRT-Q-SR-
LRGTKALTEVIPLTEEAELELAENREILKEPVHGVYYDPSKDLIAEIQKQGQGQWTYQIY
 ||        |         |  ||  |   |           ||              
-RG--------P--------IA--REFFK---H---F-------AE--------------
QEPFKNLKTGKYARMRGAHTNDVKQLTEAVQKITTESIVIWGKTPKFKLPIQKETWETWW
 |          |    ||                                         
-E---------HA----AH-----------------------------------------
TEYWQATWIPEWEFVNTPPLVKLWYQLEDIQMTQTTSSLSASLGDRVTISCSASQDISSY
      |     |  |       |                    ||              
------T-----E--N----A--W---------R----------DR--------------
LNWYQQKPEGTVKLLIYYTSSLHSGVPSAFSGSGSGTDYSLTISNLEPEDFATYYCQQYS
            |                |          |    |     |      | 
---F--R-----K----------------F----------L----L-----A------Y-
KFPWTFGGGTKLEIKRADAAPTVSIFPPSSEQLTSGGASVVCFLNNFYPKDINVAWAIDG
        |    |   |                             |         |  
--------G----I---D------------D----------------Y---------I--
SAAANGVLNSWTDQDSKDSTYSMSSTLTLTADEYEAANSYTCAATHKTSTSPIVKSFNAN
                  | |            ||                       | 
------------------S-Y------------YE-----------------------A-
ECQITLKESGPGIVQPSQPFRLTCTFSGFSLSTSGIGVTWIRQPSGKGLEWLATIWWDDD
       |                                         |          
-------E-----------------------------------------E----------
NRYNPSLKSRLTVSKDTSNNQAFLNMMTVETADTAIYYCAQSAITSVTDSAMDHWGQGTS
    |         |    |   |                                    
----P-----M---K----N---L------------------------------------
VTVSSAATTPPSVYPLAPGSAAQTNSMVTLGCLVKGYFPEPVTVTWNSGSLSSGVHTFPA
        | |      |                 |          |             
--------T-PT-----P-----------------G----------N-------------
VLQSDLYTLSSSVTVPSSTWPSETVTCNVAHPASSTKVDKKI
      |                    |      |       
------Y--------------------N------S-------
1j5o 1ign  144 1422  189  10.13
PISPIETVPVKLKPGMDGPKVKQWPLTEEKIKALVEICTEMEKEGKISKIGPENPYNTPV
                |        | ||    |         |                
----------------D--------L-EE----L---------E--------Q-------
FAIKKKDSTKWRKLVDFRELNKRTQDFWEVQLGIPHPAGLKKKKSVTVLDVGDAYFSVPL
||   |  |       |    |        |                             
FA---K--T-------F----K--------Q-----------------------------
DEDFRKYTAFTIPSINNETPGIRYQYNVLPQGWKGSPAIFQSSMTKILEPFKKQNPDIVI
    |                 |                                     
----R-----------------R-------------------------------------
YQYIDDLYVGSDLEIGQHRTKIEELRQHLLRWGLTTPDKKHQKEPPFLWMGYELHPDKWT
              |     |        |  |             |             
--------------I-----K--------L--G-------------F-------------
VQPIVLPEKDSWTVNDIQKLVGKLNWASQIYPGIKVRQLSKLLRGTKALTEVIPLTEEAE
            |                        |      |               
------------T------------------------Q------G---------------
LELAENREILKEPVHGVYYDPSKDLIAEIQKQGQGQWTYQIYQEPFKNLKTGKYARMRGA
             | |        | |       |           | |    |    | 
-----------D-V-G--------L-A-M-----G-----------K-L----Y----G-
HTNDVKQLTEAVQKITTESIVIWGKTPKFKLPIQKETWETWWTEYWQATWIPEWEFVNTP
  ||                        |                 | |         | 
--ND------------------------F-------------S---Q-T---------T-
PLVKLWYQLEKEPIVGAETFYVDGAANRETKLGKAGYVTNKGRQKVVPLTNTTNQKTELQ
             |             |                             |  
-------------I------------SR--------F--------------------E--
AIYLALQDSGLEVNIVTDSQYALGIIQAQPDKSESELVNQIIEQLIKKEKVYLAWVPAHK
    |     |  |        |           |                        |
----A-----L--N--------L-----------S----------------F-------K
GIGGNEQVDKLVSAGIRKPISPIETVPVKLKPGMDGPKVKQWPLTEEKIKALVEICTEME
    |                            |                     |    
----N----------------------------M---------------------C----
KEGKISKIGPENPYNTPVFAIKKKDSTKWRKLVDFRELNKRTQDFWEVQLGIPHPAGLKK
                              |      | |              |     
------------------------------K------L-K--------------P-----
KKSVTVLDVGDAYFSVPLDEDFRKYTAFTIPSINNETPGIRYQYNVLPQGWKGSPAIFQS
      |          | |   |                          |         
------L----------L-E---K--------------------------W---------
SMTKILEPFKKQNPDIVIYQYIDDLYVGSDLEIGQHRTKIEELRQHLLRWGLTTPDKKHQ
     |      |          |       |    | |         |    |      
-----L------N----------D----A--E----R-K----K----R----T------
KEPPFLWMGYELHPDKWTVQPIVLPEKDSWTVNDIQKLVGKLNWASQIYPGIKVRQLSKL
                     |   |    |           |        |        
-----------------S---I---E----T-----------N--------I--------
LRGTKALTEVIPLTEEAELELAENREILKEPVHGVYYDPSKDLIAEIQKQGQGQWTYQIY
 |       |      |   |    |  |          |                    
-R-------V------A---L----E--K----------S--------------------
QEPFKNLKTGKYARMRGAHTNDVKQLTEAVQKITTESIVIWGKTPKFKLPIQKETWETWW
   |  |             |         |                | |          
---F--L---E---------N---------Q----------------K-P----------
TEYWQATWIPEWEFVNTPPLVKLWYQLEDIQMTQTTSSLSASLGDRVTISCSASQDISSY
|         | |   |              |                |   |  |    
T-----S---E-E-I-T--------------M----------------I---A--D----
LNWYQQKPEGTVKLLIYYTSSLHSGVPSAFSGSGSGTDYSLTISNLEPEDFATYYCQQYS
     |                                  |   |   |           
-----Q----------------------------------L---NM--E-----------
KFPWTFGGGTKLEIKRADAAPTVSIFPPSSEQLTSGGASVVCFLNNFYPKDINVAWAIDG
          | |         | |                                   
----------K-E---------V-I------------------------R----------
SAAANGVLNSWTDQDSKDSTYSMSSTLTLTADEYEAANSYTCAATHKTSTSPIVKSFNAN
      |   |                              |                 |
------V---W----------------------------F-C-----------------N
ECQITLKESGPGIVQPSQPFRLTCTFSGFSLSTSGIGVTWIRQPSGKGLEWLATIWWDDD
                    |                    ||   |  |          
--------------------R--------------------RQ---K--E----------
NRYNPSLKSRLTVSKDTSNNQAFLNMMTVETADTAIYYCAQSAITSVTDSAMDHWGQGTS
       | |                                 |                
-------K-R---------------------------------I----------------
VTVSSAATTPPSVYPLAPGSAAQTNSMVTLGCLVKGYFPEPVTVTWNSGSLSSGVHTFPA
                                                            
------------------------------------------------------------
VLQSDLYTLSSSVTVPSSTWPSETVTCNVAHPASSTKVDKKI
                           |   |          
---------------------------N---P----------
1j5o 1oct  115 1422  131   8.09
PISPIETVPVKLKPGMDGPKVKQWPLTEEKIKALVEICTEMEKEGKISKIGPENPYNTPV
  |     |           | |                        |        |   
--S-----P-RI--------V-Q------------------------S--------N---
FAIKKKDSTKWRKLVDFRELNKRTQDFWEVQLGIPHPAGLKKKKSVTVLDVGDAYFSVPL
               |   |   |    |        |               || |  |
---------------D---L---T----E--------A---------------AY-S--L
DEDFRKYTAFTIPSINNETPGIRYQYNVLPQGWKGSPAIFQSSMTKILEPFKKQNPDIVI
             |        |       |  |         |   |            
-------------S--------R---D---Q--K------R--M---L------------
YQYIDDLYVGSDLEIGQHRTKIEELRQHLLRWGLTTPDKKHQKEPPFLWMGYELHPDKWT
  |   | |  |  |   | |      |         |            |         
--Y---LFV--D-QI---R-K-----SH---------D------------G---------
VQPIVLPEKDSWTVNDIQKLVGKLNWASQIYPGIKVRQLSKLLRGTKALTEVIPLTEEAE
   |   |        |   | |   |  |              |   ||        | 
---I-C-E--------IH--VAK--YA-EIF-------------G---LT-----S--A-
LELAENREILKEPVHGVYYDPSKDLIAEIQKQGQGQWTYQIYQEPFKNLKTGKYARMRGA
 | |                 |||    |      |            ||    |   | 
-E-A-----------------SKD----I-R----Q-A----------LKS--FA---G-
HTNDVKQLTEAVQKITTESIVIWGKTPKFKLPIQKETWETWWTEYWQATWIPEWEFVNTP
     |   | |        |       |               |       |  |    
-----K---E-V--------V-------F---------------Y-------E-SF----
PLVKLWYQLEKEPIVGAETFYVDGAANRETKLGKAGYVTNKGRQKVVPLTNTTNQKTELQ
|    |    | |                     |            |            
P----WF-I-K-P---------------------A-H--S-------P-----S-R----
AIYLALQDSGLEVNIVTDSQYALGIIQAQPDKSESELVNQIIEQLIKKEKVYLAWVPAHK
         ||         |             |                    |  | 
---------GL---------Y-------------S--------------------V--H-
GIGGNEQVDKLVSAGIRKPISPIETVPVKLKPGMDGPKVKQWPLTEEKIKALVEICTEME
 |  |                               |              |        
-I--N-------------------------------P----Y---------L--------
KEGKISKIGPENPYNTPVFAIKKKDSTKWRKLVDFRELNKRTQDFWEVQLGIPHPAGLKK
       |    |     | |          |      | |   |               
-------I----PF----F-I----G-----L----Q-N-R---F---------------
KKSVTVLDVGDAYFSVPLDEDFRKYTAFTIPSINNETPGIRYQYNVLPQGWKGSPAIFQS
    |                ||        |   ||              |    |   
----T--------------Q-FR------L-S---ET--------------K-E--I---
SMTKILEPFKKQNPDIVIYQYIDDLYVGSDLEIGQHRTKIEELRQHLLRWGLTTPDKKHQ
  |         ||           |                      |           
--T---------NP-----------Y--A------------------MR-----------
KEPPFLWMGYELHPDKWTVQPIVLPEKDSWTVNDIQKLVGKLNWASQIYPGIKVRQLSKL
     |   |               |  |            |    | |           
-----L---Y---------------E--S------------L--C-Q-Y-----------
LRGTKALTEVIPLTEEAELELAENREILKEPVHGVYYDPSKDLIAEIQKQGQGQWTYQIY
                        |   |         |  |        | |     | 
------------------------R---K---------P--D--------GSG-----I-
QEPFKNLKTGKYARMRGAHTNDVKQLTEAVQKITTESIVIWGKTPKFKLPIQKETWETWW
                      |  |     ||       |         |     |   
----------------------V-SL-----KI--D----W-------I-I-----E---
TEYWQATWIPEWEFVNTPPLVKLWYQLEDIQMTQTTSSLSASLGDRVTISCSASQDISSY
  | |             |                                   |   | 
-RY-Q---L---------P-----------------------------------Q---S-
LNWYQQKPEGTVKLLIYYTSSLHSGVPSAFSGSGSGTDYSLTISNLEPEDFATYYCQQYS
   | |                                         | |          
---Y-Q------R--------------------------------M-P-D----------
KFPWTFGGGTKLEIKRADAAPTVSIFPPSSEQLTSGGASVVCFLNNFYPKDINVAWAIDG
     |         |         |      |       ||          |       
-----F----R---RR---------F------L-----Q-VC---------VN-----E-
SAAANGVLNSWTDQDSKDSTYSMSSTLTLTADEYEAANSYTCAATHKTSTSPIVKSFNAN
        |      |   |  |     |         ||            |       
------I-N------SR--T-PM----RL---------SY------------I-------
ECQITLKESGPGIVQPSQPFRLTCTFSGFSLSTSGIGVTWIRQPSGKGLEWLATIWWDDD
|     |                                       ||            
E-----K----------------------------------K----KG------------
NRYNPSLKSRLTVSKDTSNNQAFLNMMTVETADTAIYYCAQSAITSVTDSAMDHWGQGTS
         |                              |   |  |     |      
---------R------------------------------Q---T--T-----H------
VTVSSAATTPPSVYPLAPGSAAQTNSMVTLGCLVKGYFPEPVTVTWNSGSLSSGVHTFPA
                                 |   |              |    |  
---------------------------I-----V---F--------------S----F--
VLQSDLYTLSSSVTVPSSTWPSETVTCNVAHPASSTKVDKKI
    |                              |      
--R-D-----------------------I------T------
1j5o 1rep  158 1422  214  11.11
PISPIETVPVKLKPGMDGPKVKQWPLTEEKIKALVEICTEMEKEGKISKIGPENPYNTPV
     |     |       ||            |         |        |       
-----E-----L-------KV-----------SL---------E--------E-------
FAIKKKDSTKWRKLVDFRELNKRTQDFWEVQLGIPHPAGLKKKKSVTVLDVGDAYFSVPL
           |   |   |       |                                
-----------R---D---L-------W--------------------------------
DEDFRKYTAFTIPSINNETPGIRYQYNVLPQGWKGSPAIFQSSMTKILEPFKKQNPDIVI
                  |   |                           |         
------------------T---R---------------------------F---------
YQYIDDLYVGSDLEIGQHRTKIEELRQHLLRWGLTTPDKKHQKEPPFLWMGYELHPDKWT
                    |  |         | |       |     |          
--------------------K--E---------L-T----N--E-----M----------
VQPIVLPEKDSWTVNDIQKLVGKLNWASQIYPGIKVRQLSKLLRGTKALTEVIPLTEEAE
   ||       |         | |       |   |      |         |      
---IV-------T---------K-N-------G---R------R----M---FP------
LELAENREILKEPVHGVYYDPSKDLIAEIQKQGQGQWTYQIYQEPFKNLKTGKYARMRGA
         ||     |    |            |         |  |      | |   
--------VLK-----V----S--M-S-------G-----L--DP--N------A-M---
HTNDVKQLTEAVQKITTESIVIWGKTPKFKLPIQKETWETWWTEYWQATWIPEWEFVNTP
                                            |             | 
--------------------------------------------Y-------------T-
PLVKLWYQLEKEPIVGAETFYVDGAANRETKLGKAGYVTNKGRQKVVPLTNTTNQKTELQ
  | |   |          | |  ||             |  |            |    
--V-L---L--------D-F-V--AA--D----------NH-R-----------WK----
AIYLALQDSGLEVNIVTDSQYALGIIQAQPDKSESELVNQIIEQLIKKEKVYLAWVPAHK
  |         ||         |                        |     |||   
--Y---------VN---------G------------------------E-----WVP---
GIGGNEQVDKLVSAGIRKPISPIETVPVKLKPGMDGPKVKQWPLTEEKIKALVEICTEME
   |          |  |   | |            |   | |            |    
---G----------G--K---P-E------------P---QAP-------S----C----
KEGKISKIGPENPYNTPVFAIKKKDSTKWRKLVDFRELNKRTQDFWEVQLGIPHPAGLKK
             |                                     | ||     
-------V-----Y-------------------------------------I-HP-----
KKSVTVLDVGDAYFSVPLDEDFRKYTAFTIPSINNETPGIRYQYNVLPQGWKGSPAIFQS
          |   | |          |          |           |         
----------D---S-P---N------F----------G---AH------W---------
SMTKILEPFKKQNPDIVIYQYIDDLYVGSDLEIGQHRTKIEELRQHLLRWGLTTPDKKHQ
 | |         |  |           |         |            | |      
-M-K--D------P--V------S-F--S---------KV--------K--L-T----N-
KEPPFLWMGYELHPDKWTVQPIVLPEKDSWTVNDIQKLVGKLNWASQIYPGIKVRQLSKL
|      |                        |      |          |         
K------M------------------------N------G----------G---------
LRGTKALTEVIPLTEEAELELAENREILKEPVHGVYYDPSKDLIAEIQKQGQGQWTYQIY
  |       |         |  |   |    |               |          |
--G-----Q-I-------M-L--N-S-L----H---------------K----------Y
QEPFKNLKTGKYARMRGAHTNDVKQLTEAVQKITTESIVIWGKTPKFKLPIQKETWETWW
 ||          |    |          |        |  |                  
-EP----------RI---H---I------V-R------V--G------------------
TEYWQATWIPEWEFVNTPPLVKLWYQLEDIQMTQTTSSLSASLGDRVTISCSASQDISSY
                                           |   |            
-------------------------------------------G---T------------
LNWYQQKPEGTVKLLIYYTSSLHSGVPSAFSGSGSGTDYSLTISNLEPEDFATYYCQQYS
     |         |  | | |    | |                 ||   |    |  
-----Q------R-MI--T-S-H----S-F-----------------PE---T----Q--
KFPWTFGGGTKLEIKRADAAPTVSIFPPSSEQLTSGGASVVCFLNNFYPKDINVAWAIDG
     |       |     |  |          |   |         |            
-----F-------I-----A--V----------T---A---------Y------------
SAAANGVLNSWTDQDSKDSTYSMSSTLTLTADEYEAANSYTCAATHKTSTSPIVKSFNAN
             |                                             |
-------------Q---------------------------------------------N
ECQITLKESGPGIVQPSQPFRLTCTFSGFSLSTSGIGVTWIRQPSGKGLEWLATIWWDDD
|      |                           |  |             |       
E------E---------------------------I--T-------------A-------
NRYNPSLKSRLTVSKDTSNNQAFLNMMTVETADTAIYYCAQSAITSVTDSAMDHWGQGTS
      ||      |                                      |      
------LK----I-K--------------------------------------H------
VTVSSAATTPPSVYPLAPGSAAQTNSMVTLGCLVKGYFPEPVTVTWNSGSLSSGVHTFPA
          |          |            |                      |  
----N-----P--F-------A------------K-----------------A----F--
VLQSDLYTLSSSVTVPSSTWPSETVTCNVAHPASSTKVDKKI
 |  |                           |   |     
-L--D---------------------------A---K-ERN-
1j5o 1xbr  144 1422  184  10.13
PISPIETVPVKLKPGMDGPKVKQWPLTEEKIKALVEICTEMEKEGKISKIGPENPYNTPV
          | |   |  ||          |  |  |   | | | |    |       
----LD----KQKE-LDS-KVRN--V-KD--K--V-MC--IEHEIK-S-L--E---D---
FAIKKKDSTKWRKLVDFRELNKRTQDFWEVQLGIPHPAGLKKKKSVTVLDVGDAYFSVPL
      |        ||    | |      |    |   |  ||          |    |
--L--QD--EY----DFK-C-K-T-----LQ-NREH-L-L-LKK----M-----YL-M-L
DEDFRKYTAFTIPSINNETPGIRYQYNVLPQGWKGSPAIFQSSMTKILEPFKKQNPDIVI
|   ||           |                          |   |    ||     
DNK-RK-----------EV--V-HK--II-E-------LL--NVT---E-L-TQN---A-
YQYIDDLYVGSDLEIGQHRTKIEELRQHLLRWGLTTPDKKHQKEPPFLWMGYELHPDKWT
      |    | |         |       |      |  |        |         
------L-I-ND-EL------V-E-------W------KRRQ-QSA-C-IG-----G---
VQPIVLPEKDSWTVNDIQKLVGKLNWASQIYPGIKVRQLSKLLRGTKALTEVIPLTEEAE
  |   |        | | |    ||       | |   |  |        |        
--P---P--NA-CL-D-Q-L--Q-NW----FT-I-VAE-S--L---Q---QV-----R-Q
LELAENREILKEPVHGVYYDPSKDLIAEIQKQGQGQWTYQIYQEPFKNLKTGKYARMRGA
  |      | |            |  | ||      ||     |     | |       
-QL---KK-L-E-----------EL--E-QK-----YTYE-H-DP---I-T-K-------
HTNDVKQLTEAVQKITTESIVIWGKTPKFKLPIQKETWETWWTEYWQATWIPEWEFVNTP
  |  |      |       | |  |  | |  |            |   |    ||   
--N--K------Q-------VLWDRT--FSL-FQ------------Q-L-I-QSSFV---
PLVKLWYQLEKEPIVGAETFYVDGAANRETKLGKAGYVTNKGRQKVVPLTNTTNQKTELQ
  |      |  |     |        |   | | | |     |       |   |  | 
--V------ERQPCM--PT-H----PQRPLVL-KTG-V-----Q----F--TV--K--LR
AIYLALQDSGLEVNIVTDSQYALGIIQAQPDKSESELVNQIIEQLIKKEKVYLAWVPAHK
     |    |    |      |     |      || |     |  | || |      |
-----L----L----V---K--L-----Q------EL-N--Y-NL--KVKV-L-F---DK
GIGGNEQVDKLVSAGIRKPISPIETVPVKLKPGMDGPKVKQWPLTEEKIKALVEICTEME
    ||     |  | ||      |   |    |         |  |    |     |  
DV--NER-N-TVK-GFRK-FNILGT-HTKVM-NME-EST-NGSLAAE-FRHL-QL-KEQK
KEGKISKIGPENPYNTPVFAIKKKDSTKWRKLVDFRELNKRTQDFWEVQLGIPHPAGLKK
  |       | |             |         ||      | | ||    | ||  
NAG--TRTN-EGP--L-I--V-----T------E--ELH--SLSF-ETQL-C-QP-GL--
KKSVTVLDVGDAYFSVPLDEDFRKYTAFTIPSINNETPGIRYQYNVLPQGWKGSPAIFQS
   |   |      | |               | |       |   || ||    |    
---V-I-DL-ET-TSLPV----------VV--ISN----VS-Q---LPSGW----A----
SMTKILEPFKKQNPDIVIYQYIDDLYVGSDLEIGQHRTKIEELRQHLLRWGLTTPDKKHQ
|   ||            |     | |    |    |     |        | |      
S---IL--W---------YN-M--L-V-A--E--P-R----NL-S--F-F-L-T------
KEPPFLWMGYELHPDKWTVQPIVLPEKDSWTVNDIQKLVGKLNWASQIYPGIKVRQLSKL
  ||            |  |   |    |         |  | |  |      |    | 
--PP---CA------RW-AQ---L----S------E--V--LSW--Q-F-S-SV---TK-
LRGTKALTEVIPLTEEAELELAENREILKEPVHGVYYDPSKDLIAEIQKQGQGQWTYQIY
 ||   |  |          |  |   |     |      | |         |       
-RG---L-NV-------D-QL--N--ML-----G---E--K-L---L-----G-------
QEPFKNLKTGKYARMRGAHTNDVKQLTEAVQKITTESIVIWGKTPKFKLPIQKETWETWW
  |  |      |        |   |      |       |  |  |     ||      
--P--N------A----S-P-D--GL------I---P---W--T-RF---C-KE--NI--
TEYWQATWIPEWEFVNTPPLVKLWYQLEDIQMTQTTSSLSASLGDRVTISCSASQDISSY
         | |          ||   |         |    |     |           
ND--K-NF-PFW----------LW--IE---------SI---L-E-L-I----KKHLLP-
LNWYQQKPEGTVKLLIYYTSSLHSGVPSAFSGSGSGTDYSLTISNLEPEDFATYYCQQYS
| |      |     |        |    |  |       |    |   |      ||  
L-W---N-DG----CI-----M--G----FI-S-KERERAL----L--KD------QQ--
KFPWTFGGGTKLEIKRADAAPTVSIFPPSSEQLTSGGASVVCFLNNFYPKDINVAWAIDG
  | ||     |   |         |  ||      ||        |        |    
--PGTF-----L-L-R---------FSESSRE----GA--I----TF-------TW-VER
SAAANGVLNSWTDQDSKDSTYSMSSTLTLTADEYEAANSYTCAATHKTSTSPIVKSFNAN
|   ||           |            |   |    |    | |       |   | 
S--QNG---G----E-PD--F---H-----A--VE---PY----T-K-------KELSA-
ECQITLKESGPGIVQPSQPFRLTCTFSGFSLSTSGIGVTWIRQPSGKGLEWLATIWWDDD
    |     | |                           |  |     |          
---VTF----PDIIR-N--YKV--------MAAE----N-I--P-----E----------
NRYNPSLKSRLTVSKDTSNNQAFLNMMTVETADTAIYYCAQSAITSVTDSAMDHWGQGTS
   ||     |   |        |             |     |    |   ||      
---NP-----L---K-------YL-------------Y--PN-I----DK--DH------
VTVSSAATTPPSVYPLAPGSAAQTNSMVTLGCLVKGYFPEPVTVTWNSGSLSSGVHTFPA
      |                       |   | |              | |  |   
------A------F----------------G---K-YY-------------SRGIKT---
VLQSDLYTLSSSVTVPSSTWPSETVTCNVAHPASSTKVDKKI
        |            |      |     |       
----E---L-----I------S------V-----S-------
1j5o 1bf5  258 1422  544  18.14
PISPIETVPVKLKPGMDGPKVKQWPLTEEKIKALVEICTEMEKEGKISKIGPENPYNTPV
                                 |             |  |         
---------------------------------L-------------S--G---------
FAIKKKDSTKWRKLVDFRELNKRTQDFWEVQLGIPHPAGLKKKKSVTVLDVGDAYFSVPL
                 | ||      |  |      |||  | |      | |      
-----------------R-LN------W--Q-AL---AGL--KAS------G-A------
DEDFRKYTAFTIPSINNETPGIRYQYNVLPQGWKGSPAIFQSSMTKILEPFKKQNPDIVI
 |              |        |||         | |    |       |       
-E---Q----------N----L---YNV----F--N-AVFE-G-T-------K-------
YQYIDDLYVGSDLEIGQHRTKIEELRQHLLRWGLTTPDKKHQKEPPFLWMGYELHPDKWT
  |   ||     |      |               |  || |    |   |        
--YV--LY-----E------K---------------P--KHLKN---L---Y--------
VQPIVLPEKDSWTVNDIQKLVGKLNWASQIYPGIKVRQLSKLLRGTKALTEVIPLTEEAE
 |  |||  |   |  | |     |      |      ||         |     |    
AQ-VVLPD-D---V--I-KEI--FN------P-L-I-DLS---------T-----T----
LELAENREILKEPVHGVYYDPSKDLIAEIQKQGQGQWTYQIYQEPFKNLKTGKYARMRGA
               ||   |     |             |  |   |  |         
-----------Q--WGV--SP-----A-----------FAI--E---N--T-E------T
HTNDVKQLTEAVQKITTESIVIWGKTPKFKLPIQKETWETWWTEYWQATWIPEWEFVNTP
|            |     |   |        | |              |    |     
H------------K-----I-LFG-----E--I-KR--Q----D---G-WV---E--G--
PLVKLWYQLEKEPIVGAETFYVDGAANRETKLGKAGYVTNKGRQKVVPLTNTTNQKTELQ
          | |   |      |   |    | |       |            |  | 
----------KDP--SA------G---R----GNA-H---E-R--------SC--K--L-
AIYLALQDSGLEVNIVTDSQYALGIIQAQPDKSESELVNQIIEQLIKKEKVYLAWVPAHK
                |            |      |       |    | |        
--F-------------T------------P----G-L-------L----KAYRT-I-G--
GIGGNEQVDKLVSAGIRKPISPIETVPVKLKPGMDGPKVKQWPLTEEKIKALVEICTEME
||  |   |              |     | |         |          |       
GI--N---D--------E-----E---I-L-P-F-------W----------V-V---F-
KEGKISKIGPENPYNTPVFAIKKKDSTKWRKLVDFRELNKRTQDFWEVQLGIPHPAGLKK
 ||    |       |        |  | |  |  ||    |  ||              
-EG--D-I-------T-------RD-PK-R--V--REI---T--FW-------Y------
KKSVTVLDVGDAYFSVPLDEDFRKYTAFTIPSINNETPGIRYQYNVLPQGWKGSPAIFQS
       |    |       |             |      |        |   |    |
-------D--H-Y------QD-------------N------Y-F--M---WR--PN--ES
SMTKILEPFKKQNPDIVIYQYIDDLYVGSDLEIGQHRTKIEELRQHLLRWGLTTPDKKHQ
      |   |             | |       ||     |         |     |  
G-----E---K-------------L-V-------QH---FNE------K--L-----K--
KEPPFLWMGYELHPDKWTVQPIVLPEKDSWTVNDIQKLVGKLNWASQIYPGIKVRQLSKL
|        | |  ||       |    |          | |||  |   | |    |  
K--------Y-L--DK-S-E---L----S----------GRLNW--QALAGLKA---S--
LRGTKALTEVIPLTEEAELELAENREILKEPVHGVYYDPSKDLIAEIQKQGQGQWTYQIY
  |             |  |   |   |      |          |    |     |  |
--G-------------A--E--QN---L----YNV-FN-A---VFE----GT-K--YVLY
QEPFKNLKTGKYARMRGAHTNDVKQLTEAVQKITTESIVIWGKTPKFKLPIQKETWETWW
  | | |   |         |    |  | |       |     |     | |       
EKP-KHL---K---------N----L-YA-Q------VVL----PD-DV-I-K-------
TEYWQATWIPEWEFVNTPPLVKLWYQLEDIQMTQTTSSLSASLGDRVTISCSASQDISSY
 |      |    | |  ||        |         |  |     |      |     
-E------I----F-N--PLI-------D---------L--S-----T-----TQ-----
LNWYQQKPEGTVKLLIYYTSSLHSGVPSAFSGSGSGTDYSLTISNLEPEDFATYYCQQYS
  |      | |           |  | ||            | |   |   |       
--W------G-V-----------S--P-AF---------A--IEN--TE---T-----H-
KFPWTFGGGTKLEIKRADAAPTVSIFPPSSEQLTSGGASVVCFLNNFYPKDINVAWAIDG
|    |  |   |||| |    |       |     |            ||     |  |
KI--LF--G---EIKRQD-G-WV-------E-----G------------KD--PS-A--G
SAAANGVLNSWTDQDSKDSTYSMSSTLTLTADEYEAANSYTCAATHKTSTSPIVKSFNAN
     |  |                     |   |   |  |    |         |   
----RG--N---------------------A--HE--RS--C----K-----L---F---
ECQITLKESGPGIVQPSQPFRLTCTFSGFSLSTSGIGVTWIRQPSGKGLEWLATIWWDDD
    |     ||        |   |  |       |       |      |       | 
----T-----PGLLK-A--YR---TI-G-GINDEEI----L--P----F-WV--VFEGDI
NRYNPSLKSRLTVSKDTSNNQAFLNMMTVETADTAIYYCAQSAITSVTDSAMDHWGQGTS
 |  |  | |  |                    |   |              ||      
TR-DP--K-R--V-R-----E-------I----T-FWY--------------DH------
VTVSSAATTPPSVYPLAPGSAAQTNSMVTLGCLVKGYFPEPVTVTWNSGSLSSGVHTFPA
             |        | |           ||       |      ||      
-------------Y--------QDN-----------YF-----M-WRP-N-ESG-EKL--
VLQSDLYTLSSSVTVPSSTWPSETVTCNVAHPASSTKVDKKI
| |                   |               |   
V-Q---H------------F-NEKL--K-KY------LD---
1j5o 1d02  233 1422  397  16.39
PISPIETVPVKLKPGMDGPKVKQWPLTEEKIKALVEICTEMEKEGKISKIGPENPYNTPV
               |               |   |  |                |    
---------------M---------------K---E--T---------R------Y---C
FAIKKKDSTKWRKLVDFRELNKRTQDFWEVQLGIPHPAGLKKKKSVTVLDVGDAYFSVPL
 |            |     |    |           |      |      |  |     
-A------------V----CN----DY----------A------S------G--Y-----
DEDFRKYTAFTIPSINNETPGIRYQYNVLPQGWKGSPAIFQSSMTKILEPFKKQNPDIVI
      |             |          | |   | |          ||       |
----H-Y-------------GV---WS-C-EGCK---A-F----------FKR-S----I
YQYIDDLYVGSDLEIGQHRTKIEELRQHLLRWGLTTPDKKHQKEPPFLWMGYELHPDKWT
 |             | |                   |           |     |   |
-Q-------------G-H---------N---------D--------Y--M---C-P-A-T
VQPIVLPEKDSWTVNDIQKLVGKLNWASQIYPGIKVRQLSKLLRGTKALTEVIPLTEEAE
            |  |      | |           |      |  |           | 
-N-----Q--C-TI-D------K-N-----------R------R--K--S-----C-QA-
LELAENREILKEPVHGVYYDPSKDLIAEIQKQGQGQWTYQIYQEPFKNLKTGKYARMRGA
  |   |   |       |        |      |              ||  |     |
CRL---R---K-----C-Y--------EV-----G-----M-------MKT-RYC----A
HTNDVKQLTEAVQKITTESIVIWGKTPKFKLPIQKETWETWWTEYWQATWIPEWEFVNTP
  ||      |       |    |                    |               
VCND---Y--A-------S----G--------------------Y---------HY-G--
PLVKLWYQLEKEPIVGAETFYVDGAANRETKLGKAGYVTNKGRQKVVPLTNTTNQKTELQ
  |  |           |     |         ||     | |                 
--V--W---------SCE-----G-C-------KA-FF--K-R-----------------
AIYLALQDSGLEVNIVTDSQYALGIIQAQPDKSESELVNQIIEQLIKKEKVYLAWVPAHK
 |    |  |   |   |  |        |        ||     |             |
SI----Q--G-H-N---D--Y-M----C-P--A-T---NQ-C--TI--D----------K
GIGGNEQVDKLVSAGIRKPISPIETVPVKLKPGMDGPKVKQWPLTEEKIKALVEICTEME
    |           ||  |                   |         |    |    
----N----R------RK--S-----------------C-Q---------A----C----
KEGKISKIGPENPYNTPVFAIKKKDSTKWRKLVDFRELNKRTQDFWEVQLGIPHPAGLKK
                             | |   |   |      ||  |       | 
-----------------------------R-L---R---K-C--Y-EV--GM-----MKM
KKSVTVLDVGDAYFSVPLDEDFRKYTAFTIPSINNETPGIRYQYNVLPQGWKGSPAIFQS
|   |       |  |    |   | |    |      |  | | |    |  |      
KE--T------RYCAV-CN-D---Y-A----S------G--YHYGV----W--S-C--E-
SMTKILEPFKKQNPDIVIYQYIDDLYVGSDLEIGQHRTKIEELRQHLLRWGLTTPDKKHQ
   |    ||       | |             | |                   |    
G-CKAF--FKR-S----I-Q-------------G-H---------N---------D----
KEPPFLWMGYELHPDKWTVQPIVLPEKDSWTVNDIQKLVGKLNWASQIYPGIKVRQLSKL
       |     |   |            |  |      | |           |     
----Y--M---C-P-A-T-N-----Q--C-TI-D------K-N-----------R-----
LRGTKALTEVIPLTEEAELELAENREILKEPVHGVYYDPSKDLIAEIQKQGQGQWTYQIY
 |  |           |       |  |            |                  |
-R--K--S-----C-QA----C--R--LR-----------K---C--------------Y
QEPFKNLKTGKYARMRGAHTNDVKQLTEAVQKITTESIVIWGKTPKFKLPIQKETWETWW
 |       |    |                                |    |       
-E----V--G----M----------M---------------------K----K-------
TEYWQATWIPEWEFVNTPPLVKLWYQLEDIQMTQTTSSLSASLGDRVTISCSASQDISSY
            |   |       |               |     |   |    |   |
------------E---T----R--Y--------------CA-----V---C--N-D---Y
LNWYQQKPEGTVKLLIYYTSSLHSGVPSAFSGSGSGTDYSLTISNLEPEDFATYYCQQYS
         |       |    |            |       |    |      |    
AS-------G-------Y----H------Y-----GV-W----S-C--E--G---C-K-A
KFPWTFGGGTKLEIKRADAAPTVSIFPPSSEQLTSGGASVVCFLNNFYPKDINVAWAIDG
 |   |        ||       ||      |                            
-F---F--------KR-------SI------Q----------------------------
SAAANGVLNSWTDQDSKDSTYSMSSTLTLTADEYEAANSYTCAATHKTSTSPIVKSFNAN
     |           |  | |                  |         |      | 
-----G-----------D--Y-M------------------C---------P------A-
ECQITLKESGPGIVQPSQPFRLTCTFSGFSLSTSGIGVTWIRQPSGKGLEWLATIWWDDD
    |            |     |                             ||    |
----T-----------NQ-----C-----------------------------TI----D
NRYNPSLKSRLTVSKDTSNNQAFLNMMTVETADTAIYYCAQSAITSVTDSAMDHWGQGTS
   |     |    |  |                    | | |                 
-K-N---R-R----K--S--------------------C-Q-A-------C-----R---
VTVSSAATTPPSVYPLAPGSAAQTNSMVTLGCLVKGYFPEPVTVTWNSGSLSSGVHTFPA
               |               |    |  |   |         |      
---------------L------R--K-----C----Y--E---V---------G------
VLQSDLYTLSSSVTVPSSTWPSETVTCNVAHPASSTKVDKKI
                                        | 
-----M--M-------------------------------K-
1j5o 1hcq  178 1422  290  12.52
PISPIETVPVKLKPGMDGPKVKQWPLTEEKIKALVEICTEMEKEGKISKIGPENPYNTPV
                         ||    ||      ||      |    |  |    
--A----------------------LT----KA------EM------S----E--Y---L
FAIKKKDSTKWRKLVDFRELNKRTQDFWEVQLGIPHPAGLKKKKSVTVLDVGDAYFSVPL
|     |     ||     | ||  |           |    |     | |        |
F-----D-----KL-G---LSKR--D-----------A----KE----L-V-E------L
DEDFRKYTAFTIPSINNETPGIRYQYNVLPQGWKGSPAIFQSSMTKILEPFKKQNPDIVI
   |     |       |   ||              |         ||     |     
---F-----F------EE---IR----------R---A---------LE-----N-----
YQYIDDLYVGSDLEIGQHRTKIEELRQHLLRWGLTTPDKKHQKEPPFLWMGYELHPDKWT
         |   |  |                                        |  
---------G---E--Q----V-----------------------------------K--
VQPIVLPEKDSWTVNDIQKLVGKLNWASQIYPGIKVRQLSKLLRGTKALTEVIPLTEEAE
     |    |          |                      |               
-----L----S----------G--------F-------------G---------------
LELAENREILKEPVHGVYYDPSKDLIAEIQKQGQGQWTYQIYQEPFKNLKTGKYARMRGA
     |                 |                        |        |  
-----N------------F----D------------------------L--------R--
HTNDVKQLTEAVQKITTESIVIWGKTPKFKLPIQKETWETWWTEYWQATWIPEWEFVNTP
   |                              |                      |  
---D------------------------------K----------------------N--
PLVKLWYQLEKEPIVGAETFYVDGAANRETKLGKAGYVTNKGRQKVVPLTNTTNQKTELQ
       |    |          |   |           |       |       ||   
-------Q--R-P----------G---R-----------N-------P-------KT---
AIYLALQDSGLEVNIVTDSQYALGIIQAQPDKSESELVNQIIEQLIKKEKVYLAWVPAHK
         | |                  |              |          |   
---------G-E------------------D--------------I----------P---
GIGGNEQVDKLVSAGIRKPISPIETVPVKLKPGMDGPKVKQWPLTEEKIKALVEICTEME
 |           |  |       |      |   |    |        | |        
-I----------TA--RR-V--V-T----FRP---G----Q--------K-L--------
KEGKISKIGPENPYNTPVFAIKKKDSTKWRKLVDFRELNKRTQDFWEVQLGIPHPAGLKK
   | |    |   |    |     |                            |     
---K-SRV--E---N----A-----S----------------------------P-----
KKSVTVLDVGDAYFSVPLDEDFRKYTAFTIPSINNETPGIRYQYNVLPQGWKGSPAIFQS
 |  |         |    |            |  |    |     |        |    
-K-MT------K--S----E---------L--I--E----R-----L--------A----
SMTKILEPFKKQNPDIVIYQYIDDLYVGSDLEIGQHRTKIEELRQHLLRWGLTTPDKKHQ
  |        |       |        |      |   |                    
--T--------Q-------Q--------S------H---I--------------------
KEPPFLWMGYELHPDKWTVQPIVLPEKDSWTVNDIQKLVGKLNWASQIYPGIKVRQLSKL
   |           | |    |  |       |          |        |      
---P----A------K-T----V--E-------D----------A--------V------
LRGTKALTEVIPLTEEAELELAENREILKEPVHGVYYDPSKDLIAEIQKQGQGQWTYQIY
    |              |       | |  |                           
----K--------------EM------L-E--H---------------------------
QEPFKNLKTGKYARMRGAHTNDVKQLTEAVQKITTESIVIWGKTPKFKLPIQKETWETWW
              |             |       |      |    |           
--------------M-------------A-------S------T----L-----------
TEYWQATWIPEWEFVNTPPLVKLWYQLEDIQMTQTTSSLSASLGDRVTISCSASQDISSY
     |                           |         | |          |   
-----A---------------------------Q---------GER----------I---
LNWYQQKPEGTVKLLIYYTSSLHSGVPSAFSGSGSGTDYSLTISNLEPEDFATYYCQQYS
        |               |    |   ||        | |            | 
--------E--IR-----------G----F---GS---F----S-L--------H---Y-
KFPWTFGGGTKLEIKRADAAPTVSIFPPSSEQLTSGGASVVCFLNNFYPKDINVAWAIDG
               |   |       |     |  |        |  ||          
---------------R---A-------P---R-T--G-------RN--PK----------
SAAANGVLNSWTDQDSKDSTYSMSSTLTLTADEYEAANSYTCAATHKTSTSPIVKSFNAN
     |                         |              |      |      
T----G-------------------------D--------------K------V------
ECQITLKESGPGIVQPSQPFRLTCTFSGFSLSTSGIGVTWIRQPSGKGLEWLATIWWDDD
|    | | |   |    |         |              | ||  |          
E----L-E-GK-YV----P-H-------F------------K-P-GK--E----------
NRYNPSLKSRLTVSKDTSNNQAFLNMMTVETADTAIYYCAQSAITSVTDSAMDHWGQGTS
      |  |     |     |  |                  |                
------L--R-----D----RA--N------------------I----------------
VTVSSAATTPPSVYPLAPGSAAQTNSMVTLGCLVKGYFPEPVTVTWNSGSLSSGVHTFPA
                                    |                |      
------------------------------------Y----------------G------
VLQSDLYTLSSSVTVPSSTWPSETVTCNVAHPASSTKVDKKI
                                          
------------------------------------------
1j5o 1ihf  152 1422  190  10.69
PISPIETVPVKLKPGMDGPKVKQWPLTEEKIKALVEICTEMEKEGKISKIGPENPYNTPV
                                        |                   
----------------------------------------M-------------------
[truncated: 30,147,212 more chars]
